# Supplementary material for: Current treatments in diabetic macular oedema: systematic review and meta-analysis
Source: PubMed Central journal article supplement — BMJ Open. 2013 Mar 1;3(3):e002269. doi: 10.1136/bmjopen-2012-002269 (PMC3612765; doi:10.1136/bmjopen-2012-002269), 2013-03-01
Supplement: bmjopen-2012-002269.draft_revisions.pdf [file bmjopen-2012-002269.draft_revisions.pdf]

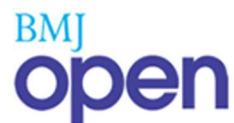

**Current treatments in Diabetic Macular Oedema: systematic review and meta-analysis**

|                                 |                                                                                                                                                                                                                                                                                                                                         |
|---------------------------------|-----------------------------------------------------------------------------------------------------------------------------------------------------------------------------------------------------------------------------------------------------------------------------------------------------------------------------------------|
| Journal:                        | <i>BMJ Open</i>                                                                                                                                                                                                                                                                                                                         |
| Manuscript ID:                  | bmjopen-2012-002269                                                                                                                                                                                                                                                                                                                     |
| Article Type:                   | Research                                                                                                                                                                                                                                                                                                                                |
| Date Submitted by the Author:   | 26-Oct-2012                                                                                                                                                                                                                                                                                                                             |
| Complete List of Authors:       | Ford, John; University of East Anglia, Public Health<br>Lois, Noemi; NHS Grampian,<br>Royle, Pamela; Warwick Medical School, Warwick Evidence<br>Clar, Christine<br>Shyangdan, Deepson; Warwick Medical School, Warwick Evidence<br>Waugh, Norman; University of Warwick, Warwick Evidence; Warwick<br>Medical School, Warwick Evidence |
| <b>Primary Subject Heading</b>: | Ophthalmology                                                                                                                                                                                                                                                                                                                           |
| Secondary Subject Heading:      | Ophthalmology                                                                                                                                                                                                                                                                                                                           |
| Keywords:                       | Diabetic retinopathy < DIABETES & ENDOCRINOLOGY, OPHTHALMOLOGY,<br>Clinical trials < THERAPEUTICS                                                                                                                                                                                                                                       |
|                                 |                                                                                                                                                                                                                                                                                                                                         |

SCHOLARONE™  
Manuscripts

1  
2  
3 Title:

4  
5 *Current treatments in Diabetic Macular Oedema: systematic review and meta-analysis*

6  
7 Authors: *John A. Ford*<sup>1</sup>, *Noemi Lois*<sup>2</sup>, *Pamela Royle*<sup>3</sup>, *Christine Clar*<sup>4</sup>, *Deepson Shyangdan*<sup>3</sup>, *Norman*  
8 *Waugh*<sup>3</sup>  
9

10 <sup>1</sup> Health Technology Assessment Group, University of Aberdeen ,UK

11 <sup>2</sup> Department of Ophthalmology, NHS Grampian, Aberdeen, UK

12 <sup>3</sup> Warwick Evidence, Division of Health Sciences, Warwick Medical School, Coventry, UK

13 <sup>4</sup> Researcher in systematic reviews, Berlin, Germany  
14  
15

16  
17 Corresponding author

18 Dr. John Ford

19 HTA Group

20 University of Aberdeen

21 Polwarth Building

22 Foresterhill

23 Aberdeen

24 AB25 2ZD

25 [john.ford@abdn.ac.uk](mailto:john.ford@abdn.ac.uk)

26 [Tel: 01224 559441](tel:01224559441)

27 Fax: 01224 550925  
28  
29

30 Funding: None

31 Conflicts of interest: None

32 Key words: anti-VEGF, steroid, diabetic macular oedema, ranibizumab, bevacizumab, pegaptanib,  
33 aflibercept, dexamethasone, fluocinolone, triamcinolone  
34

35 Protocol: This review was built upon several technology appraisals for NICE and therefore no  
36 protocol exists.  
37

### 38 Disclosure

39  
40 The authors report no proprietary or commercial interest in any product mentioned or concept  
41 discussed in this article.  
42

43 No additional data available.  
44  
45  
46  
47  
48  
49  
50  
51  
52  
53  
54  
55  
56  
57  
58  
59  
60

**Abstract (300 words max)**

Objectives: The aim of this systematic review is to appraise the evidence for the use of anti-VEGF drugs and steroids in diabetic macular oedema (DMO) as assessed by change in best corrected visual acuity (BCVA), central macular thickness and adverse events

Data source: MEDLINE, Embase, Web of Science with Conference Proceedings and the Cochrane Library (inception to July 2012). Certain conference abstracts and drug regulatory websites were also searched.

Study eligibility criteria, participants and interventions: Randomised controlled trials were used to assess clinical effectiveness and observational trials were used for safety. Trials which assessed triamcinolone, dexamethasone, fluocinolone, bevacizumab, ranibizumab, pegaptanib or aflibercept in patients with DMO were included.

Study appraisal and synthesis methods: Risk of bias was assessed using the cochrane risk of bias tool. Study results are narratively described and, where appropriate, data was pooled using random effects meta-analysis.

Results: Anti-VEGF drugs are effective compared to both laser and placebo and seem to be more effective than steroids in improving BCVA. They have been shown to be safe in the short-term but require frequent injections. Studies assessing steroids (triamcinolone, dexamethasone, fluocinolone) have reported mixed results when compared with laser or placebo. Steroids have been associated with increased incidence of cataracts and intra-ocular pressure rise but require fewer injections, especially when steroid implants are used.

Limitations: The quality of included studies varied considerably. Five out of fourteen meta-analyses had moderate or high statistical heterogeneity.

Conclusions and implications of key findings: The anti-VEGFs, ranibizumab and bevacizumab, have consistently shown good clinical effectiveness without major unwanted side effects. Steroids results have been mixed and are usually associated with cataract formation and IOP increase.

Despite the current wider spectrum of treatments for DMO, only a small proportion of patients recover good vision ( $\geq 20/40$ ) and, thus, the search for new therapies needs to continue.

## Article focus

- To review the evidence for triamcinolone, dexamethasone, fluocinolone, bevacizumab, ranibizumab, pegaptanib and aflibercept in the treatment of diabetic macular oedema

## Key messages

- The anti-VEGFs ranibizumab and bevacizumab, have consistently shown good clinical effectiveness in the short-term without major unwanted side effects
- Steroids results have been mixed and are usually associated with cataract formation and IOP increase

## Strengthens and limitations

- A robust, detailed review of the literature has been undertaken and, when appropriate, data has been combined in meta-analysis
- The quality of studies included varied considerably.

## I - Introduction

Diabetic macular oedema (DMO) is a complication of diabetic retinopathy and a leading cause of blindness. The prevalence of DMO is likely to increase with more people suffering from diabetes.[1] Increasing DMO has significant implications for patients, healthcare providers and wider society. Laser has been the mainstay of treatment, but recently anti-vascular endothelial growth factor (anti-VEGF) drugs and steroids have been introduced as potential alternatives to laser photocoagulation.

### a. Burden of disease

Diabetic retinopathy is present at the time of diagnosis of diabetes mellitus in 0-30% of individuals.[2] The incidence is estimated to be 2.3/100 person-years for the overall diabetic population and 4.5 for patients on insulin therapy.[3] There is good evidence that progression to DMO is associated with duration of disease[4-7], poor glycaemic control [8], and in type 2 diabetes, the need for insulin[9], though the need for insulin therapy is more a marker for duration, and poor control.

The number of people with DMO is likely to increase as diabetes becomes more common. Some reports have suggested a decrease in progression to severe visual loss between 1975-1985 and 1986-2008 in a combined population of type 1 and 2.[10] Regular screening for retinopathy and better glycaemic control are thought to have reduced the progression to severe visual loss. Diabetic retinopathy is associated with a reduced quality of life. Compared with all diabetic complications, blindness was perceived to be the third worst health state after a major stroke and amputation.[11]

In the US, the presence of DMO at diagnosis is associated with 29% additional costs within the first three years compared with individuals without retinopathy at diagnosis.[12] In 2010 the estimated healthcare costs for DMO in England were £92 million, with £65.6 million being spent on hospital treatment and related costs.[13]

Visual impairment results in increased welfare costs, early retirement, and costs of home help and carers.[14] In England in 2010 (total population 52.23 million) the estimated population with diabetes was 2.34 million; the above social costs were estimated to be £11.6 million for DMO.[13]

### b. Overview of pathophysiology

DMO is caused mainly by disruption of the blood-retinal barrier. The complex pathway that leads to this disruption has been previously described in this journal.[15] Sustained hyperglycaemia causes a multi-factorial cascade of physiological processes, involving increased permeability, cytokine activation, altered blood flow, hypoxia and inflammation. Vascular endothelial growth factor-A (VEGF-A) is a major contributor to the inflammatory process and, in particular, to angiogenesis and permeability.[16] Hypoxia caused by microvascular disease stimulates release of VEGF-A to aid perfusion. There are six major isoforms of VEGF-A: 121, 145, 165, 183, 189 and 206. In addition to causing widespread microvascular injury, there is now evidence that hyperglycaemia results in preceding neuronal dysfunction, which may contribute to visual loss.[17]

### c. Overview of current treatments

Laser photocoagulation has been the mainstay of treatment for DMO. The landmark Diabetic Retinopathy Study[18] and the Early Treatment Diabetic Retinopathy Study (ETDRS)[19,20] demonstrated its clinical effectiveness. However, although laser photocoagulation was clearly effective in preserving vision, it was less successful in restoring it, once lost. Furthermore, patients with perifoveal ischaemia are not amenable to this form of therapy. In EDTRS, although laser was shown to reduce the risk of moderate visual loss (a loss of 3 ETDRS lines) by 50%, visual acuity improved in only 3% of patients.[20] However in some recent trials, laser has improved the proportion of patients with more than or equal to 10 letters by 7-31%.[21-24] In addition, laser is not without side effects. Foveal burns, visual field defects, retinal fibrosis and laser scars have been reported.[25] Over the following decade it became apparent that certain patients suffered severe visual loss despite aggressive treatment.[26]

Steroids and anti-VEGF drugs are newer treatments in DMO. Intravitreal corticosteroids have potent anti-inflammatory effects. Triamcinolone (Kenalog) is not licensed for eye use but has been used to treat DMO for over ten years. Triamcinolone (Trivaris), more recently, was licensed for eye use. The development of intravitreal implants has allowed sustained release formulations. Fluocinolone acetonide (Iluvien, Alimera Sciences) and dexamethasone (Ozudex, Allergan) are implants that have been introduced recently.

Anti-VEGF agents have shown efficacy compared with laser. Bevacizumab (Avastin, Genentech/Roche) is a monoclonal antibody that targets all VEGF isoforms. Although being developed for colorectal cancer, it is widely used off-label, as an intravitreal treatment for macular oedema of different aetiologies. Ranibizumab (Lucentis, Genentech/Roche) is a fragment of the bevacizumab antibody (molecular weight of ranibizumab 48.4 KDa compared with 149 KDa for bevacizumab). It was designed specifically for use in the eye. Ranibizumab is considerably more expensive than bevacizumab (the estimated cost of ranibizumab is \$2,000 per dose compared with \$50 for bevacizumab).[27] Pegaptanib (Macugen, Eyetech Pharmaceuticals/Pfizer) is a PEGylated aptamer, with a high affinity to the VEGF isoform 165 and was approved for the treatment of exudative AMD in 2004. Aflibercept (Regeneron/Bayer HealthCare) is a recent addition to the anti-VEGF class that targets all forms of VEGF-A and placental growth factor.

### d. Aim of the review

The aim of this review is to provide clinicians with an up-to-date overview of current treatments for DMO. It is hoped that the information contained herein will assist clinicians to present their patients with the best evidence supporting each treatment, including possible complications. In addition, this review may be helpful to policy makers. The review focuses on the current evidence for the use of anti-VEGF drugs and steroids to treat DMO, as assessed by change in best corrected visual acuity (BCVA) (mean and proportion with more than two lines improvement), central macular thickness (CMT), as determined by optical coherence tomography (OCT), and their adverse events.

## II - Evidence acquisition

A systematic literature search was performed. The databases searched included MEDLINE, Embase, Web of Science with Conference Proceedings and the Cochrane Library. The dates searched were from the inception of each database until July 2012

The search terms combined the following key words:

ranibizumab or lucentis or bevacizumab or avastin or pegaptanib or macugen or aflibercept or vegf trap-eye or steroid\* or corticosteroid\* or dexamethasone or fluocinolone or triamcinolone or anti-VEGF\* or anti-vascular endothelial growth factor\*

AND

diabetic macular oedema or diabetic macular oedema or diabetic retinopathy or diabetic maculopathy

AND

(masked or sham or placebo OR control group or random\*) OR (systematic review or meta-analysis) OR (risk or safety or adverse or harm or pharmacovigilance or side-effect\* or precaution\* or warning\* or contraindication\* or contra-indication\* or tolerability or toxic)

The meeting abstracts of the Association for Research in Vision and Ophthalmology, the American Diabetes Association (2002-2012) and the European Association for the Study of Diabetes were searched from 2002-2012.

In addition the web sites of the European Medicines Agency and the US Food and Drug Association were searched for data on registration status and safety. Clinicaltrials.gov and the EU Clinical Trials Register were searched in July 2012 for data on ongoing research.

Full details of the searches are shown in appendix 1.

Randomised controlled trials (RCT) were used to evaluate clinical effectiveness. Safety was assessed through both RCTs and observational studies.

RCTs were included provided that they 1) addressed the use of triamcinolone, dexamethasone, fluocinolone, bevacizumab, ranibizumab, pegaptanib or aflibercept in patients with DMO, 2) had a minimum follow-up of six months, and 3) had a minimum of 25 eyes per study arm. Studies were excluded if they 1) evaluated laser only, 2) assessed the effect of the above mentioned treatments in macular oedema due to other retinal diseases (instead of DMO), 3) used only a single dose, 4) were combined with a surgical intervention or 5) published studies in languages other than English. There were no exclusions based on drug dose.

Search results were screened by two independent authors (JF and PR/DS). Data were extracted by one author (CC) and checked by a second (JF). Data extracted included inclusion/exclusion criteria, baseline demographics, BCVA expressed as a change in logMAR/ETDRS letters or proportion of participants with more than 2 or 3 lines BCVA improvement, CMT and adverse events. Risk of bias was assessed using the cochrane risk of bias tool.

1  
2  
3 Studies were assessed for similarity in study population, interventions (dose and frequency),  
4 outcomes and time to follow up, with a view to including similar studies in a meta-analysis. Only full  
5 text articles were included in the meta-analysis. A difference of six months was allowed between  
6 study follow-ups. If salient data were not reported, such as standard deviations, data were sought  
7 by personal communication with authors. Data were analysed using Review Manager software. If  
8 data from multiple time points were available, the primary end point data was used. Data were  
9 entered by one author (JF) and double-checked by a second (DS). Mean difference and odds ratios,  
10 with 95% confidence intervals were calculated. Statistical heterogeneity was measured through  $I^2$   
11 scores. A score of less than 30% was considered low heterogeneity, a score of more than 70% was  
12 considered high heterogeneity and scores between 30% and 70% were considered moderate. A  
13 random effects model was used throughout.  
14  
15  
16  
17  
18  
19  
20  
21  
22  
23  
24  
25  
26  
27  
28  
29  
30  
31  
32  
33  
34  
35  
36  
37  
38  
39  
40  
41  
42  
43  
44  
45  
46  
47  
48  
49  
50  
51  
52  
53  
54  
55  
56  
57  
58  
59  
60



### III - Results

The literature search identified 430 unique articles for possible inclusion, as shown in figure 1. 328 articles were excluded on the basis of title and abstract, leaving 102 full papers to be read. Fifty-one of these articles were excluded; the reasons for their exclusion are summarised in table 1. Fifty-one articles from 29 studies met the inclusion criteria and were included in the review; these are described in tables 2 to 15. Seven studies were suitable for meta-analysis.

#### a. Study quality

The quality of the included studies was, in general, good as is shown in table 16. (Note that the meeting abstracts were not quality assessed, due to lack of details reported on the methods). Most studies adequately described sequence generation, except in three studies where it was unclear.[28-30] However allocation concealment was poorly described throughout, with only eight reports addressing this issue appropriately. [31-38] Reporting of masking also varied. A number of studies masked patients using sham injection or sham laser.[21,24,29,31,33,36,39,40] [38]. Various studies reported that masking of patients was impossible. Assessors, where reported, were masked. In two studies incomplete outcomes were not addressed.[31,41] Baseline characteristics were consistent within study treatment arms. Administration of laser followed the ETDRS protocol, or a modified version, in all studies that described laser administration.[21-24,28,30,33,34,42,43] Two studies, both available only as meeting abstracts, did not report the laser administration details. [44,45]

#### b. Intravitreal anti-VEGFs

The characteristics of all published studies including design, inclusion/exclusion criteria, intervention, outcomes and their timing are shown in tables 2 to 7. Safety data for each drug is shown in tables 8 to 15.

##### 1. Ranibizumab

Nine RCTs have evaluated ranibizumab as a potential new treatment for patients with DMO (table 2 and 7); seven were sponsored by industry, and two were an independent investigators-led.) [21,46](table 7). READ-2 was the first large RCT (n=126).[28,47] It compared ranibizumab (0.5 mg) alone, ranibizumab in combination with laser and laser alone. At six months BCVA had improved significantly in the ranibizumab alone group compared with laser alone or ranibizumab plus laser. Addition of laser to ranibizumab did not provide additional BCVA gain. REVEAL (n=396) compared ranibizumab (0.5mg) with ranibizumab plus laser and laser alone.[48] At 12 months both ranibizumab arms resulted in a statistically significantly better improvement in BCVA compared to laser alone. The addition of laser did not confer further benefit.

Within the past two years the results of RESOLVE[36], RESTORE[24], and RISE and RIDE[38] have been published in peer-reviewed journals. RESTORE (n=345) randomised similar groups as the READ-2 study (ranibizumab (0.5 mg) alone, laser alone and ranibizumab plus laser); outcomes were evaluated at 12 months. Ranibizumab improved mean BCVA, with laser providing no additional

1  
2  
3 benefit. Two year extended follow-up suggested that these results continued.[49] RESOLVE (n=151)  
4 compared two doses of ranibizumab (0.3 mg and 0.5 mg) with sham injection. The greatest  
5 improvement in BCVA at 12 months was in the 0.3 mg group (11.8 letter gain) compared to the 0.5  
6 mg group (8.8 letters gain) or sham injection (1.4 letter loss). In this study, rescue laser was allowed  
7 after three months of treatment, if BCVA had decreased by 10 letters or more, or if the investigator  
8 considered the macula not to be flat as assessed by OCT. Only 4.9% of the ranibizumab group  
9 required rescue laser, compared with 34.7% in the sham injection group.  
10  
11

12 READ-2 and RESTORE were suitable for pooling through meta-analysis and, when doing so, it was  
13 found that ranibizumab statistically significantly improved mean BCVA compared with laser (figure  
14 2). In regards to the proportion of patients gaining more than or equal to 15 letters, individual trials  
15 showed a statistically significant difference between laser and ranibizumab but when these two  
16 trials were pooled using a random effects model the result was no longer statistically significant.  
17 When a fixed effects model was used the result was statistically significant (figure not shown). The  
18 random effects model assumes variability between studies and therefore models uncertainty into  
19 the meta-analysis. Fixed assumes no variability. Generally speaking the random effects model results  
20 in wider confidence intervals. Adding laser to ranibizumab did not add any significant benefit (figure  
21 3). In fact the mean change in BCVA and the proportion of patients with more than 15-letter gain  
22 favoured, although not statistically significantly so, ranibizumab alone compared with ranibizumab  
23 plus laser. This was probably a chance effect.  
24  
25  
26  
27

28 RISE (n=377) and RIDE (n=382) were identical in design. The study arms are similar to those in the  
29 RESOLVE study; 0.3 mg or 0.5 mg ranibizumab compared with sham. In the RISE study the  
30 proportion of patients with 15 or more letter gain was greatest in the 0.3 mg group at 24 months,  
31 whereas in the RIDE study this was greatest in the 0.5 mg group. In the DRCRN trial (n = 854), Elman  
32 and colleagues compared ranibizumab (0.5 mg) plus prompt (within 3-10 days post ranibizumab) or  
33 deferred ( $\geq 24$  weeks) laser with sham injection plus prompt laser, or triamcinolone (4m g, Trivaris)  
34 plus prompt laser (table 7). At one year both ranibizumab groups reported greater gains in mean  
35 BCVA change than triamcinolone or laser alone. Interestingly at 2 years (n= 628), the proportion of  
36 patients with 10 or more letter gain was not statistically significantly different between ranibizumab  
37 plus prompt laser and laser alone groups, but was statistically significant in the ranibizumab plus  
38 deferred laser compared with laser alone comparison. The reason for this is not clear.  
39  
40  
41  
42

43 READ-3 (n=152) has been published in abstract form and compared monthly injections of intravitreal  
44 ranibizumab high dose (2.0 mg) and low dose (0.5 mg).[50] At six months there was not a statistically  
45 significant difference in BCVA between groups.  
46

47 One study (n=63), published in abstract form, was identified which directly compared monthly  
48 injections of ranibizumab (0.5 mg) with bevacizumab (1.5 mg).[51] At 48 weeks the authors found no  
49 statistically significant difference between bevacizumab and ranibizumab.  
50  
51

52 RESTORE, READ-2 and DRCRN (12 month data used) were suitable for pooling through meta-analysis  
53 to compare ranibizumab plus laser and laser alone (figure 4). Ranibizumab plus laser resulted in a  
54 statistically significantly greater change in mean BCVA, proportion of patients with more than 15  
55 letter gain and CMT reduction versus laser alone.  
56  
57  
58  
59  
60

1  
2  
3 Adverse events are shown in tables 8 and 15. Conjunctival hemorrhages were higher in the  
4 ranibizumab arms compared with laser (RESTORE) or no treatment (RESOLVE). In the RESOLVE, RISE  
5 and RIDE studies a considerably higher incidence of intra-ocular pressure (IOP) increase was  
6 reported in the ranibizumab arm compared to control. This increase in IOP was not demonstrated in  
7 the RESTORE study. There were no consistent differences in systemic adverse events between  
8 ranibizumab and laser or placebo.  
9

## 10 11 2. Bevacizumab

12  
13 Eight RCTs investigating the use of bevacizumab in DMO were identified (table 3 and 7). One RCT,  
14 the BOLT study (n=80), randomised patients to laser therapy or 1.25 mg intravitreal  
15 bevacizumab.[23,52] At 24 months, the mean change in BCVA and the proportion of patients who  
16 gained 10 ETDRS letters or more was statistically significantly higher in the bevacizumab arm than in  
17 the laser arm. Faghihi and colleagues (n=80), compared 1.25 mg bevacizumab (average 2.23  
18 injections per patient) with 1.25 mg bevacizumab plus a single laser treatment (average 2.49  
19 injections per patient).[53] After six months, the authors found both treatments to be effective at  
20 improving BCVA but neither treatment was found to result in a greater benefit.  
21  
22

23  
24 Lam and colleagues (n=52) compared two doses of bevacizumab (1.25 mg and 2.5 mg) in patients  
25 with diffuse DMO.[35] Patients with focal DMO associated with localised retinal thickening were  
26 excluded. At 6 months, following 3 initial monthly injections (no treatment in the remaining 3  
27 months), both groups showed a statistically significant increased mean BCVA compared with  
28 baseline vision, but there was no difference between doses.  
29

30  
31 Four trials have investigated the combination of bevacizumab and triamcinolone. Ahmadieh and  
32 colleagues (n=115), compared combined bevacizumab (three 1.25 mg injections at six week  
33 intervals) plus triamcinolone (2 mg baseline injection only, Triamhexal) with bevacizumab alone  
34 (three 1.25 mg at six week intervals) and sham injection in patients who had DMO unresponsive  
35 (definition not reported) to previous laser (last session more than three months prior).[31] The  
36 combination arm and bevacizumab alone arm improved mean BCVA more than sham injection. For  
37 BCVA the combination of bevacizumab plus triamcinolone was non-statistically significantly better  
38 than bevacizumab alone.  
39

40  
41 Soheilian and colleagues (n=150) compared combined bevacizumab (1.25 mg) plus triamcinolone (2  
42 mg) with bevacizumab alone and laser alone in patients who were laser naïve.[37,41] At 36 weeks,  
43 bevacizumab alone improved BCVA more than either combination therapy or laser, although the  
44 difference was not statistically significant. Extended follow up at 24 months showed that there was  
45 no statistically significant difference between groups for BCVA, however the direction of effect  
46 favour the bevacizumab and combination arms more than the laser[54]  
47  
48

49  
50 Lim and colleagues (n=111) also evaluated the combination of bevacizumab plus triamcinolone  
51 when compared with bevacizumab alone or triamcinolone alone.[55] At 12 months the authors  
52 found no statistically significant difference between groups for BCVA or CMT.  
53

54  
55 The Efficacy Study of Triamcinolone and Bevacizumab Intravitreal for Treatment of Diabetic Macular  
56 Oedema (ATEMD) study, currently only published in abstract form, compared combined therapy  
57 with bevacizumab (1.25 mg) and triamcinolone (4 mg) with each of these alone.[56] At six months  
58  
59

1  
2  
3 they found no statistically significant difference between groups. One study comparing bevacizumab  
4 with ranibizumab is discussed above.[51] No bevacizumab trials were suitable for meta-analysis  
5 because treatment arms were not comparable among included studies.  
6

7  
8 Adverse events are shown in tables 9 and 15. There was a low frequency of adverse events reported  
9 in the included trials. A higher incidence of mild anterior chamber reaction was reported in  
10 bevacizumab groups compared with controls. The incidence of IOP increase was comparable  
11 between bevacizumab and laser. Soheilian and colleagues, were the only authors to report the  
12 incidence of lens opacity.[37,41] No patients in the bevacizumab alone group were found to have  
13 lens opacities but in four patients (8%) in the bevacizumab plus triamcinolone group this finding was  
14 observed over the 36 week follow-up period.  
15

### 16 17 3. Pegaptanib

18  
19 Two studies have evaluated pegaptanib in DMO and both compared it with sham injection (table 4).  
20 Cunningham and colleagues compare three doses of pegaptanib (0.3 mg, 1 mg and 3 mg) and sham  
21 injection in laser naive patients (n=172).[39,57] At six months patients in the 0.3 mg and 1 mg  
22 groups performed statistically significantly better than those in either 3mg or sham groups. Six  
23 injections (median) were administered in the 0.3 mg and 1 mg group, whereas only five (median)  
24 injections were administered in the 3 mg group.  
25

26  
27 The second trial (n=260), reported by Sultan and colleagues in 2011, compared pegaptanib (0.3 mg)  
28 and sham injection. At two years, the pegaptanib group showed a statistically significantly greater  
29 improvement in mean BCVA compared with sham.[40] However there was no statistically significant  
30 difference in the proportion of patients with an improvement of 10 letters or more. Patients were  
31 allowed rescue laser at the assessors' discretion (25.2% of patients in the pegaptanib group and 45%  
32 of patients in the sham group received rescue treatment). In regards to meta-analysis, data were  
33 only available to combine these trials for proportion of patients with more than 15 letter gain.  
34 Although individually neither trial demonstrated a statistically significant difference favouring  
35 pegaptanib over sham (figure 5), when pooled together in meta-analysis a statistically significant  
36 difference in favour of pegaptanib was found (OR 1.94, 95%CI 1.01 to 3.71).  
37  
38

39  
40 Adverse events for pegaptanib are shown in table 10. There was a higher incidence of eye pain  
41 compared to control (31% versus 17%). [39,57] Cataract formation was similar between pegaptanib  
42 and control groups. There was a higher incidence of IOP increase in the pegaptanib arm compared to  
43 control (17.4% versus 6.3%).[40]  
44  
45

### 46 47 4. Other anti-VEGF

48  
49 Aflibercept has been evaluated in the Da Vinci study (n=219)[30,58] (table 4). Four regimens of  
50 aflibercept (0.5 mg 4 weekly, 2 mg 4 weekly, 2 mg monthly for three months then every 8 weeks,  
51 and 2 mg monthly for three months followed by treatment as required) were compared with laser.  
52 At six months, all aflibercept arms had a statistically better BCVA and CMT change than the laser  
53 arm. The regimen that resulted in greatest BCVA gain and CMT reduction was 2 mg every 4 weeks,  
54 however statistical significance between aflibercept arms was not reported. One year extended  
55 follow-up showed that all aflibercept arms were found to have a statistically significantly better  
56 BCVA compared to laser.[58]  
57  
58

1  
2  
3 Adverse events are shown in table 11. There was a higher incidence of IOP increase and eye pain in  
4 the aflibercept group compared with laser. Other adverse events were too infrequent to draw  
5 meaningful conclusions. The incidence of cataracts was not reported.  
6  
7  
8

9  
10 c. Steroids

11 1. Dexamethasone

12  
13 Two included trials assessed the use of dexamethasone to treat DMO (table 5); Haller 2010 (full text  
14 available)[59] and Callanan (available to date only in an abstract form).[44] Haller 2010 (n=171)  
15 compared two doses of dexamethasone, administered as an intravitreal implant (350 µm and 700  
16 µm) through a 20-gauge transscleral incision, with no treatment. At 90 days only the 700 µm group  
17 showed a statistically significant higher proportion of patients with 10 or more letter gain compared  
18 to no treatment (33% compared with 12%, p = 0.007). The 350 µm group showed a non-statistically  
19 significant improvement compared with laser alone (21% compared with 12%). At 180 days there  
20 was no statistically significant difference between either the dexamethasone group and no  
21 treatment group. The treatment effect appeared to peak at three months.  
22  
23

24  
25 The second trial, by Callanan and colleagues (n=253), compared dexamethasone (dose not reported)  
26 plus laser with laser alone. Although a greater improvement in mean BCVA was seen at 1-9 months  
27 in the dexamethasone plus laser group compared with laser alone, there was no statistically  
28 significant difference at 12 months. A mean of 1.6 implants were used over the 12 month period.  
29  
30

31 These trials were not suitable for meta-analysis since one study is only available in abstract form.  
32

33 Adverse events are shown in table 12. In the 350 µm and 700 µm groups compared with no  
34 treatment, there was a higher incidence of anterior chamber cells (29.1/26.4% compared with 1.8%),  
35 anterior chamber flare (27.3/20.8% compared with 8.8%), vitreous hemorrhage (20/22.6%  
36 compared with 5.3%) and increased IOP (14.5/9.4% compared with 0%). However there was no  
37 statistically significant difference in the cataract formation between the groups at 12 months. [59]  
38 Callanan and colleagues reported an increase in IOP in the dexamethasone plus laser group  
39 compared with laser alone (20% compared with 1.6%).[44]  
40  
41  
42

43 2. Fluocinolone

44  
45 Two trials assessed fluocinolone implant for DMO (table 5). The FAME study (n=956) compared two  
46 doses of fluocinolone (0.2 µg/day and 0.5 µg/day) with sham injection in patients with at least one  
47 prior laser treatment.[29] Approximately 25% of patients in each group had more than one prior  
48 laser treatment. At 24 months both doses of fluocinolone showed a statistically significant  
49 improvement in mean BCVA compared to sham. There was a modest difference between  
50 fluocinolone groups. Rescue laser was given after the first six weeks for persistent oedema and was  
51 allowed every three months. 35-37% of patients in the fluocinolone group and 59% in the sham  
52 injection group required rescue laser. Extended follow-up at 36 months showed that the both  
53 fluocinolone arms continued to result in a statistically significant benefit compared with sham.[60]  
54  
55  
56  
57  
58  
59  
60

1  
2  
3 Pearson and colleagues (n=196) compared fluocinolone (0.59 mg) with standard of care, either laser  
4 or no treatment.[43] At three years there was no statistically significant difference in the proportion  
5 of patients with 15 letters gain or more (31% fluocinolone compared with 20% standard of care)  
6 between groups and proportion of patients losing 15 letters or more in the fluocinolone group (17%  
7 compared with 14%). Increased incidence of cataracts may have contributed to this difference.  
8  
9

10 These trials were not suitable for meta-analysis.

11  
12 Adverse events are shown in table 13. Pearson and colleagues reported a higher incidence of  
13 cataracts at three years in the fluocinolone group compared with standard of care (55.9% compared  
14 with 21.7%). In the extended report of the FAME study there was a considerably higher incidence of  
15 cataract surgery in phakic eyes in the 0.2 µg/day and 0.5µg/day fluocinolone groups (80.0% and  
16 87.2% compared with 27.3%) and increased IOP at any point (37% and 46% compared with 12%).  
17  
18

19 Following the demonstration in the FAME trial that a lower dose was about as good as higher ones,  
20 the higher doses are unlikely to be used.  
21

### 22 3. Triamcinolone 23

24 Ten trials evaluating triamcinolone were identified (table 6 and 7). All trials evaluated intravitreal  
25 administration of triamcinolone, there were no trials evaluating posterior or anterior sub-tenon  
26 injections. Two trials used Trivaris[21,61], two trials used Kenacort [32,33], one trial used  
27 Kenalog[62], one trial used Trimahexal [31] and four trials did not report the type of triamcinolone  
28 used.[34,37].[45,56] Three doses were assessed in the included studies (1 mg, 4 mg and 8 mg) and  
29 triamcinolone has been combined with laser or bevacizumab.  
30  
31

32  
33 Ip and colleagues (n=840) were the only authors to evaluate triamcinolone 1mg  
34 (Trivaris).[22,61,63,64] They found a statistically significant improvement in mean BCVA at two  
35 years in the laser group compared with the triamcinolone group and no significant difference  
36 between 1 mg compared with 4 mg.  
37

38 Several trials compared 4 mg intravitreal triamcinolone. Ip and colleagues (n=840) found that laser  
39 therapy resulted in a greater improvement in mean BCVA at two years compared to 4 mg  
40 triamcinolone (Trivaris). [22,61,63,64] Lam and colleagues (n=111), found no statistically significant  
41 difference between laser and triamcinolone at six months (triamcinolone type not reported).[34]  
42 When these two trials were pooled through meta-analysis, the treatment effect favoured laser but  
43 differences were not statistically significant (figure 6). Ockrim and colleagues (n=88) compared 4 mg  
44 intravitreal triamcinolone (Kenalog) with laser alone.[62] At 12 months they found no statistically  
45 significant BCVA improvement between the triamcinolone and laser groups. Gillies and colleagues  
46 (n=69) compared 4 mg of triamcinolone (Kenacort) with sham injection.[32] Mean BCVA improved  
47 statistically significantly with triamcinolone at 24 months compared with sham injection (3.1 letters  
48 gain compared with 2.9 letters loss, p = 0.01).  
49  
50  
51  
52

53 Lam and colleagues (n=111) compared triamcinolone 4 mg alone with 4 mg of triamcinolone plus  
54 laser or laser alone.[34] At six months the authors found no difference in BCVA between any of the  
55 groups. Elman and colleagues (n=854) compared 4 mg of triamcinolone (Trivaris) plus laser with  
56 ranibizumab plus prompt (within 3-10 days) or deferred (more than 24 week) laser and laser  
57 alone.[21] At two years they found a statistically significant difference in mean BCVA between  
58  
59  
60



1  
2  
3 ranibizumab plus prompt/deferred laser compared with laser alone (7 letters gain/9 letters gain  
4 compared with 3 letters gain), but no difference with triamcinolone plus laser compared with laser  
5 alone (2 letters gain compared with 3 letters gain). Oliveira-Neto and colleagues (n=120) compared 4  
6 mg triamcinolone alone (triamcinolone type not reported) with 4 mg plus 1.25 mg bevacizumab.[56]  
7 At six months they found no statistically significant difference between groups.  
8  
9

10 The Elman and Lam studies were suitable for meta-analysis, which showed non-statistically  
11 significant improvements in mean BCVA and the proportions of patients with more or equal than 15  
12 letter gain in the triamcinolone plus laser group compared with laser alone (figure 7).  
13

14 Adverse events are shown in table 14 and 15. Triamcinolone was associated with consistently higher  
15 incidences of IOP increase and cataracts. Gilles and colleagues reported a cataract rate of over 50%  
16 by three years in patients treated with triamcinolone.  
17  
18  
19

#### 20 21 d. Other pertinent studies 22

23 Only one study in abstract form directly compared bevacizumab with ranibizumab.[51]  
24 Bevacizumab and ranibizumab have been compared through indirect comparison of five trials.[65]  
25 There was no evidence of a difference between the drugs, however wide credible intervals meant  
26 that superiority of either drug could not be excluded.  
27  
28

29 Two-year results of the CATT (Comparison of AMD Treatment Trials) and one year results of the  
30 IVAN (Inhibit VEGF in Age-related choroidal Neovascularisation), recently published, have  
31 demonstrated a good safety profile of anti-VEGF therapies when used to treat patients with age-  
32 related macular degeneration.[66,67] The CATT study randomised 1208 patients with AMD to  
33 monthly or as required injection of either ranibizumab or bevacizumab. At 1 year the mean BCVA  
34 was similar in both groups (8.0 letter gain in bevacizumab and 8.5 in ranibizumab). Over two years,  
35 the rates of deaths, myocardial infarction and stroke did not differ between ranibizumab and  
36 bevacizumab treatment groups. However, there was a higher rate of serious adverse events in the  
37 bevacizumab compared with the ranibizumab group. This increased event rate was driven mainly  
38 by hospitalisations, (RR 1.29, 95%CI 1.01 to 1.66). However the hospitalisations were not caused by  
39 known adverse events of bevacizumab. Arterio-thrombotic events and heart failure occurred in less  
40 than 2% of participants in the IVAN, and there were more often observed in the ranibizumab group  
41 than in the bevacizumab group (p = 0.03). Further data from other ongoing clinical trials may  
42 provide more insight on the safety or anti-VEGF treatment and possible differences on this respect  
43 among available drugs.  
44  
45  
46  
47

48 Campbell and colleagues conducted a population based nested case-control study of 91,378 older  
49 adults with a history of physician diagnosed retinal disease.[68] The authors found that neither  
50 ranibizumab nor bevacizumab were associated with significant risks of ischaemic stroke, acute  
51 myocardial infarction, congestive heart failure, or venous thromboembolism.”  
52  
53

54 A recent systematic review specifically assessing adverse events in anti-VEGF drugs found a low  
55 incidence of serious (below 1 in 100) and non-serious ocular events (below 1 in 500) from  
56 ranibizumab, bevacizumab and pegaptanib.[69]  
57  
58  
59  
60

1  
2  
3 Fung and colleagues used an internet-based survey of clinicians to assess the safety of  
4 bevacizumab.[70] The survey covered over 5000 patients and found that bevacizumab was  
5 associated with an infrequent incidence of adverse events (all less than 0.21%).  
6

7  
8 One study which assessed diclofenac did not meet the inclusion criteria (follow-up for only 12  
9 weeks).[71] The authors randomised 32 patients to either intravitreal diclofenac or triamcinolone  
10 and found that both diclofenac and triamcinolone reduced CMT, but a statistically significant visual  
11 improvement was observed only in the triamcinolone group.  
12

13 Sfikakis and colleagues undertook a 30-week randomised crossover trial comparing infliximab and  
14 placebo.[72] The study failed to meet our inclusion criteria (only 11 patients included). The authors  
15 found that infliximab resulted in a 28.6% improvement in vision compared with 4.3% with placebo.  
16 The improvement seen with placebo could be due to a “carry over effect”, seen in cross over trials.  
17  
18

19 The Fenofibrate Intervention and Event Lowering in Diabetes (FIELD) trial was primarily a study to  
20 see if the lipid-lowering agent fenofibrate, could reduce macrovascular and microvascular events in  
21 type 2 diabetes.[73] However a substudy within FIELD recruited 1012 patients to a retinopathy  
22 study. The primary outcome in the main study was need for laser therapy (3.4% on fenofibrate  
23 versus 4.9% on placebo) but the substudy used retinal photography to assess progression of  
24 retinopathy or development of macular oedema. The hazard ratio at six years for DMO was 0.69  
25 (95%CI 0.54 to 0.87) in the fenofibrate group compared to placebo.  
26  
27

28 Ruboxistaurin is another oral agent which has been assessed for the treatment of DMO. Aiello and  
29 colleagues randomised 686 patients to receive placebo or one of three doses of ruboxistaurin.  
30 [74,75] There was no statistically significant difference in delay to sight-threatening DMO in any  
31 ruboxistaurin group compared to placebo. The authors suggest that differences in laser treatment  
32 between groups may have contributed to the non-significant finding.  
33  
34

#### 35 36 37 38 e. Assessment of heterogeneity within meta-analysis

39 Heterogeneity was assessed methodologically and statistically. Methodological heterogeneity was  
40 assessed by comparing study population, interventions, outcome measures and follow-up. Studies  
41 that were not methodologically comparable were excluded from the meta-analysis. For example  
42 bevacizumab trials were not pooled because Soheilian and colleagues included patients who were  
43 laser naïve[37] and Ahmadiéh and colleagues included patients who were unresponsive to laser.[31]  
44 Some analyses were also excluded because sufficient details were not reported in the studies. For  
45 example several studies failed to report standard deviations.[35,39]  
46  
47  
48

49 Statistical heterogeneity was assessed through  $I^2$  scores. High statistical heterogeneity was found in  
50 two analyses (2.3, 4.3). Therefore these results should be interpreted with due caution. Moderate  
51 heterogeneity was found in three analyses (2.2, 3.1, 3.2). Low heterogeneity was found in the  
52 remaining eight analyses.  
53  
54  
55

#### 56 57 f. Ongoing trials



1  
2  
3 There are numerous on-going studies listed in appendix 2. The most salient studies include a study  
4 to compare ranibizumab and bevacizumab (Schmidt-Erfurth), a study investigating rescue  
5 ranibizumab treatment for patients who have failed on bevacizumab (Chaudhry), a study evaluating  
6 two algorithms for ranibizumab, 'treat and extend' and 'as required' (RETAIN), further studies of  
7 Trap-eye (VIVID and VISTA) and trials which are examining the use of NSAIDs, such as diclofenac and  
8 nepafenac (NEVANAC and Soheilian).  
9  
10  
11  
12  
13  
14  
15  
16  
17  
18  
19  
20  
21  
22  
23  
24  
25  
26  
27  
28  
29  
30  
31  
32  
33  
34  
35  
36  
37  
38  
39  
40  
41  
42  
43  
44  
45  
46  
47  
48  
49  
50  
51  
52  
53  
54  
55  
56  
57  
58  
59  
60

For peer review only

#### IV – Discussion

It appears that anti-VEGF treatment is effective in DMO, especially ranibizumab and bevacizumab. Meta-analysis of available short-term data (up to 2 years) suggests that ranibizumab is superior to laser and that adding laser to ranibizumab treatment does not confer additional benefit. Steroid treatment has demonstrated mixed success and, almost uniformly, increased incidence of cataracts and increased IOP. The licence for fluocinolone takes note of this and it is positioned as a treatment when others have failed.

##### a. Strengths and limitations of the review

There are a number of strengths of this review. A robust systematic review methodology was used. Reliability was improved by excluding trials with small sample sizes or short follow up. Since a number of trials included similar intervention arms, consistent treatment effects further improve reliability. Validity was improved by assessing the quality of trials using the Cochrane risk of bias tables. Including abstracts from ARVO provided up to date results. Pooling results through meta-analysis provided further evidence. The random effects model was used throughout to allow for heterogeneity among studies.

This review, however, has limitations. Although the inclusion of abstracts provides a more up to date results, the studies contained in these abstracts could not be assessed for risk of bias and should therefore be interpreted with caution. In addition, reporting of quality assessment criteria was variable. Allocation concealment was especially poorly reported. There was only one study which compared different anti-VEGFs<sup>[51]</sup> and none that compared steroids (fluocinolone vs dexamethasone vs. triamcinolone). Therefore it is difficult to assess the effectiveness within drug classes. As with any meta-analysis questions of heterogeneity arise. Follow-up periods varied among studies. A difference of six months was allowed for studies to be pooled for meta-analysis but this could have still resulted in heterogeneity. High statistical heterogeneity was found in a quarter of analyses. Furthermore because of the low number of trials included, publication bias could not be assessed by funnel plot analysis. The manufacturers funded most of the trials for ranibizumab, pegaptanib, dexamethasone and fluocinolone, whereas trials for bevacizumab and triamcinolone were generally funded by non-pharmaceutical organisations. Generally, the non-commercial studies had smaller numbers, perhaps because of funding restraints.

It is important to note that there may be differences in laser treatment protocol between studies. This applies to trials which combine drug treatments with laser or include laser as a comparator. All studies referred to the ETDRS protocol [19,20] or a modified version of it. In the ETDRS, once the diagnosis of clinically significant macular oedema was made, an angiogram was obtained to identify "treatable lesions". "Treatable lesions" included discrete points of retinal hyperfluorescence or leakage (most of these are often microaneurisms), areas of diffuse leakage within the retina related to microaneurisms, intraretinal microvascular abnormalities, diffusely leaking retinal capillary bed and retinal avascular zones. In the ETDRS protocol, treatment of lesions closer than 500 microns from the centre of the macula was not required initially; however if vision was less than 20/40 and the oedema and leakage persisted, treatment up to 300 microns from the

1  
2  
3 centre of the macula was recommended unless there was capillary dropout; in the latter case  
4 treatment was not recommended as it may lead to further loss of perifoveal capillaries  
5

6  
7 However in routine clinical practice clinicians generally use lighter and less intense treatment than  
8 specified in the ETDRS protocol.[76] In addition, some centres do not use fluorescein angiography  
9 (unlike the ETDRS study[19]) to guide treatment. The exact adherence to the ETDRS protocol within  
10 studies is unclear. For example, in the BOLT study a modified ETDRS protocol was used. One of the  
11 aims of the protocol was “not darkening/whitening of microaneuysms”, which is not consistent with  
12 the ETDRS protocol.  
13

#### 14 15 16 17 b. Interpretation of the results

18  
19 The anti-VEGF drugs appear to be clinically effective in treating DMO in short-term studies (up to 2  
20 years). Ranibizumab has the most robust evidence base and has shown superiority compared to  
21 laser and sham injection in all trials and meta-analyses, except for the proportion of patients with 10  
22 or more letter gain in the DRCR.net study published by Elman and colleagues at two years follow  
23 up.[46] Adding laser to ranibizumab conferred no benefit. Bevacizumab has also been shown to be  
24 superior to laser. Three doses have been used (1.25 mg, 1.5 mg and 2.5 mg). The higher dose does  
25 not appear to add further benefit, and most studies in the literature use 1.25 mg. Addition of  
26 triamcinolone to bevacizumab did not provide further benefits. Pegaptanib has only been compared  
27 to sham injection. Mean change in BCVA favoured pegaptanib, but only through meta-analysis did  
28 the proportion of patients with more than 15 letter gain favour pegaptanib. Further published data  
29 are required before drawing conclusions on aflibercept. However although the anti-VEGF drugs are a  
30 significant advance, they fail to improve BCVA by 10 or more letters in half or more patients, and so  
31 they do not provide a complete answer to DMO.  
32  
33  
34

35  
36 Steroid treatments have inconsistent results and are undoubtedly associated with increased IOP and  
37 cataract. The effects of dexamethasone appear to peak at three months. At six months there was no  
38 significant difference compared with laser. This might imply that earlier re-treatment is needed if  
39 the beneficial effect is to be maintained, but increasing the number of treatments would likely  
40 increase the associated complications, especially with the relatively large needle size. The addition  
41 of laser did not appear to add further benefit. There was no significant difference in cataract  
42 formation at six months with dexamethasone compared to observation but it is likely that a higher  
43 incidence of cataracts would be seen with longer follow-up. Significantly more patients suffered  
44 increased IOP in the dexamethasone group compared with observation. Fluocinolone has been  
45 shown to be effective compared with sham injection (FAME)[29,60], however when compared to  
46 standard of care (laser or observation at clinician’s discretion) there was no significant difference in  
47 the proportion of patients with a 15 letter or more gain. Both studies reported higher incidence of  
48 cataract formation in the fluocinolone group, over 80% at three years at the higher dose. Results for  
49 triamcinolone are inconsistent. Ip and colleagues found that laser was more effective[61], others  
50 have found no statistically significant difference. Triamcinolone combined with laser, however,  
51 seemed to have similar efficacy as ranibizumab combined with laser in pseudophakic eyes.[21,46]  
52 Triamcinolone is more effective than sham injection. Triamcinolone has consistently been associated  
53 with increased incidence of cataract and raised IOP.  
54  
55  
56  
57  
58  
59  
60

1  
2  
3 Steroids and laser therapy may affect CMT in a different manner from anti-VEGF drugs. For example,  
4 when ranibizumab alone is compared with ranibizumab plus laser, ranibizumab alone appears to be  
5 more effective in terms of mean change in BCVA and proportion of patients with more than 15  
6 letters gain. However ranibizumab plus laser is more effective at reducing CMT. Furthermore when  
7 triamcinolone plus laser is compared with ranibizumab plus laser, ranibizumab plus laser appears to  
8 be more effective in terms of change in BCVA and proportion of patients with more than 15 letters  
9 gain, but triamcinolone plus laser is more effective at reducing CMT. The reasons for this are  
10 unclear. There is a weak correlation between CMT and BCVA. However the long term benefits of  
11 reducing CMT are currently unknown.  
12  
13

14  
15 No large observational studies were identified that compared anti-VEGF drugs. Fung and colleagues,  
16 using an internet based survey, found the incidence of adverse events in bevacizumab to be low.[70]  
17 One small outbreak of sterile endophthalmitis was reported with a single batch of bevacizumab in  
18 Canada, emphasising the need for sterility when preparing aliquots.[77] Curtis and colleagues  
19 carried out a very large retrospective cohort study in 146,942 patients aged 65 and over with age-  
20 related macular degeneration (AMD).[78] Their aim was to examine the cardiovascular outcomes in  
21 patients treated with the four options: photodynamic therapy (PDT), pegaptanib, bevacizumab and  
22 ranibizumab. The authors reported that one of their comparisons showed an increase in overall  
23 mortality and stroke risk with bevacizumab compared to ranibizumab, with hazard ratios 0.86  
24 (95%CI 0.75 to 0.98) and 0.78 (0.64 to 0.96) respectively. However because of the very large cost  
25 differences between bevacizumab and ranibizumab, the authors noted that selection bias might be  
26 operating, with poorer people (with poorer health) more likely to be treated with bevacizumab.  
27 They therefore carried out another analysis using only ophthalmological clinics which used only one  
28 drug, to avoid selection bias. This analysis showed no significant difference: overall mortality hazard  
29 ratio for ranibizumab 1.10 (95%CI 0.85 to 1.141); MI 0.87 (0.53 to 1.14); stroke 0.87 (0.61 to 1.24).  
30  
31  
32  
33

34  
35 Gower and colleagues analysed 77,886 anti-VEGF injections from Medicare data (46% ranibizumab  
36 and 54% bevacizumab).[79] Results have only been published in abstract form. The authors found an  
37 increased risk of overall mortality and cerebrovascular events in the bevacizumab group (HR 1.11  
38 99%CI 1.01 to 1.23 and 1.57, 1.04 to 2.37 respectively). There was no statistically significant  
39 increased risk in the ranibizumab group. The authors acknowledge that a limitation of the study is a  
40 failure to adjust for important confounding factors (such as smoking, hypertension and  
41 hyperlipidaemia). Considering the cost difference, it is likely that patients treated with bevacizumab  
42 would have been in a lower socio-economic class and therefore would be at high risk of mortality  
43 and vascular disease.  
44  
45  
46  
47

#### 48 49 c. Implications for clinicians

50  
51 The anti-VEGF drugs appear to be a significant advance in the treatment of DMO and are regarded  
52 now as the treatment of choice for patients affected by this condition. Studies assessing the  
53 effectiveness of steroids have reported mixed results. The high rates of cataract and increased IOP  
54 are a drawback. Triamcinolone combined with laser may be a good option for pseudophakic patients  
55 and may be more cost-effective than treatment with ranibizumab. However the need for fewer  
56 administrations, potentially one every three years with fluocinolone, is advantageous. From an  
57 administration perspective, some patients might prefer infrequent steroid injections with a sizeable  
58  
59  
60

1  
2  
3 risk of cataract, and a small, but existent, risk of glaucoma, to frequent anti-VEGF injections, even if  
4 the potential gain may not be fully comparable. Steroids may be also considered for patients that do  
5 not adequately respond to anti-VEGFs. Currently, the role of laser in the treatment of DMO is  
6 debatable. Short term data from available trials have demonstrated the superiority of anti-VEGF  
7 with regards to laser treatment and have failed to demonstrate a benefit of combining both  
8 treatment approaches. It is possible that some ophthalmologists may still opt to offer laser  
9 treatment to patients with very focal areas of leakage.  
10  
11

12  
13 Currently there is more evidence for the effectiveness of ranibizumab and bevacizumab than for  
14 pegaptanib and VEGF-trap eye. The results of direct head to head trials of ranibizumab and  
15 bevacizumab are awaited. Bevacizumab is not licensed for intraocular use but costs considerably  
16 less than other forms of therapy. Ranibizumab is licensed and more expensive, but its use is  
17 supported by large manufacturer funded trials demonstrating its clinical effectiveness. In the UK,  
18 the General Medical Council recommends that unlicensed medications should only be prescribed if  
19 “an alternative, licensed medicine would not meet the patient’s needs” and there is “a sufficient  
20 evidence base and/or experience of using the medication to demonstrate its safety and  
21 efficacy”.<sup>[80]</sup> The FDA says that when using a drug “off-label” clinicians “have the responsibility to  
22 be well informed about the product, to base its use on firm scientific rationale and on sounded  
23 medical evidence, and to maintain records of the product's use and effects”.<sup>[81]</sup> Patients should be  
24 fully aware of the use of any unlicensed medication and consent to any safety or efficacy  
25 uncertainties.  
26  
27  
28

29  
30 The place of intravitreal steroids needs consideration now that we have the anti-VEGFs drugs, as  
31 does the role of laser. The anti-VEGFs drugs may now be the first-line treatment in place of laser,  
32 with laser being used selectively for focal lesions, and in sequence after anti-VEGF therapy once the  
33 retinal thickness has been reduced. However it should be noted that about half of patients do not  
34 get good results with anti-VEGFs. In RESTORE, only 50% of patients had gains in VA of 10 or more  
35 letters. So the anti-VEGFs are “game-changers” but their impact should not be over-estimated.  
36  
37

38  
39 In those who do not respond to anti-VEGFs or laser, there remains a place for steroids, despite their  
40 high adverse effect rates. The European licence for fluocinolone recognises this, by stating that it  
41 should be used when other therapies have not had sufficient effect.<sup>[82]</sup> The commonest adverse  
42 effect is cataract, but that is very common in people with diabetes, and many are already  
43 pseudophakic when treatment of DMO is required.  
44  
45

#### 46 47 d. Implications for policy makers

48  
49 In the UK, the National Institute of Health and Clinical Excellence (NICE) has recently made the  
50 decision not to recommend ranibizumab for the treatment of DMO.<sup>[83]</sup> NICE concluded that  
51 ranibizumab, although clinically effective, was not cost-effective compared to laser therapy.  
52 Bevacizumab is less than a tenth of the cost of ranibizumab. Bevacizumab is unlikely to be licensed.  
53 This beckons the question as to whether policy makers should recommend cheaper unlicensed  
54 medications over a more expensive licensed alternative when efficacy and side effects appear  
55 similar.  
56  
57  
58  
59  
60

e. Unanswered questions

Several unanswered questions remain. Studies evaluating the effectiveness of ranibizumab compared with bevacizumab are needed. Although the anti-VEGFs are clinically effective and a major step forward in the management of DMO, it has to be noted that they have little effect in a large number of patients. Generally speaking, the proportion of patients who have demonstrated 10 or more letter gain using anti-VEGFs is between 30-50% in the trials that demonstrate greatest effectiveness. Most of these patients would not achieve the 20/40 visual acuity required for driving. More effective treatments, or combinations of treatments, are required.

There is a lack of specific evidence for the use of anti-VEGF drugs or steroids in patients with macular ischemia secondary to DMO. A number of trials excluded patients with macular ischemia.[23,34,35,40,53,62] The RESTORE trial included patients with macular ischemia and undertook a subgroup analysis.[24] The authors compared patients with (n=34) and without (n=35) macular ischemia at baseline. They found that those without macular ischemia responded better to ranibizumab (mean average change in BCVA at 12 months 7.2 letters gain compared with 6.3 letters). Larger trials are needed to assess the use of anti-VEGF drugs and steroids in patients with macular ischemia.

The duration of treatment is as yet uncertain. Most of the included studies use a retreatment protocol based on clinical need or OCT results. For example, in the BOLT study patients received a median of 9 injections of bevacizumab over 24 months.[23,84] However, it is not yet known how frequent long-term maintenance injections will be needed for and whether laser treatment in sequence could potentially reduce the number of anti-VEGF injections required. Other treatment strategies to apply laser, such as using laser power at sub-threshold levels, may prove more effective.[85] Future trials should use active comparators which are used in routine clinical practice and avoid placebo controlled trials.

## V - Conclusion

This review evaluated current treatments for DMO. Undoubtedly, the use of anti-VEGFs heralds a new era for patients who suffer from DMO. Currently, the anti-VEGFs ranibizumab and bevacizumab, have consistently shown good clinical effectiveness without major unwanted side effects. Steroids results have been mixed and are usually associated with cataract formation and IOP increase. Based on the short term data available, adding laser therapy to anti-VEGFs does not appear to confer additional benefit.

Despite the current wider spectrum of treatments for DMO, only a small proportion of patients recover good vision ( $\geq 20/40$ ) and, thus, the search for new therapies to prevent and manage DMO needs to continue.

## Contribution of authors

JF screened titles, checked data extraction, performed the meta-analysis and drafted manuscript. NL conceived the idea, interpreted the results and provided clinical expertise throughout. PR performed the literature search, updated the searches, screened titles and managed the references. CC extracted data from the studies. DS screened titles and checked the meta-analysis. NW designed the review and supervised the running of the study. All authors contributed to the final draft.

## Data Sharing Statement

No additional data available.

## Funding

None

## Competing Interests

None

## Reference List

1. Holman N, Forouhi NG, Goyder E, et al. The Association of Public Health Observatories (APHO) Diabetes Prevalence Model: estimates of total diabetes prevalence for England, 2010-2030. *Diabet Med* 2011;28:575-82.
2. Williams R, Airey M, Baxter H, et al. Epidemiology of diabetic retinopathy and macular oedema: a systematic review. *Eye (Lond)* 2004;18:963-83.
3. Henricsson M, Sellman A, Tyrberg M, et al. Progression to proliferative retinopathy and macular oedema requiring treatment. Assessment of the alternative classification of the Wisconsin Study. *Acta Ophthalmol Scand* 1999;77:218-23.
4. Chen E, Looman M, Laouri M, et al. Burden of illness of diabetic macular edema: literature review. *Curr Med Res Opin* 2010;26:1587-97.
5. Hirai FE, Knudtson MD, Klein BE, et al. Clinically significant macular edema and survival in type 1 and type 2 diabetes. *Am J Ophthalmol* 2008;145:700-6.
6. Klein R, Klein BE, Moss SE, et al. The Wisconsin Epidemiologic Study of Diabetic Retinopathy: XVII. The 14-year incidence and progression of diabetic retinopathy and associated risk factors in type 1 diabetes. *Ophthalmology* 1998;105:1801-15.
7. Klein R, Knudtson MD, Lee KE, et al. The Wisconsin Epidemiologic Study of Diabetic Retinopathy XXIII: the twenty-five-year incidence of macular edema in persons with type 1 diabetes. *Ophthalmology* 2009;116:497-503.
8. Knudsen LL, Lervang HH, Lundbye-Christensen S, et al. The North Jutland County Diabetic Retinopathy Study (NCDRS) 2. Non-ophthalmic parameters and clinically significant macular oedema. *Br J Ophthalmol* 2007;91:1593-5.
9. Thomas RL, Dunstan F, Luzio SD, et al. Incidence of diabetic retinopathy in people with type 2 diabetes mellitus attending the Diabetic Retinopathy Screening Service for Wales: retrospective analysis. *BMJ* 2012;344:e874.



10. Wong TY, Mwamburi M, Klein R, et al. Rates of progression in diabetic retinopathy during different time periods: a systematic review and meta-analysis. *Diabetes Care* 2009;32:2307-13.
11. Huang ES, Brown SE, Ewigman BG, et al. Patient perceptions of quality of life with diabetes-related complications and treatments. *Diabetes Care* 2007;30:2478-83.
12. Shea AM, Curtis LH, Hammill BG, et al. Resource use and costs associated with diabetic macular edema in elderly persons. *Arch Ophthalmol* 2008;126:1748-54.
13. Minassian DC, Owens DR, Reidy A. Prevalence of diabetic macular oedema and related health and social care resource use in England. *Br J Ophthalmol* 2012;96:345-9.
14. Happich M, Reitberger U, Breitscheidel L, et al. The economic burden of diabetic retinopathy in Germany in 2002. *Graefes Arch Clin Exp Ophthalmol* 2008;246:151-9.
15. Bhagat N, Grigorian RA, Tutela A, et al. Diabetic macular edema: pathogenesis and treatment. *Surv Ophthalmol* 2009;54:1-32.
16. Murata T, Ishibashi T, Khalil A, et al. Vascular endothelial growth factor plays a role in hyperpermeability of diabetic retinal vessels. *Ophthalmic Res* 1995;27:48-52.
17. Barile GR, Pachydaki SI, Tari SR, et al. The RAGE axis in early diabetic retinopathy. *Invest Ophthalmol Vis Sci* 2005;46:2916-24.
18. The Diabetic Retinopathy Study Research Group. Preliminary report on effects of photocoagulation therapy. *Am J Ophthalmol* 1976;81:383-96.
19. Early Treatment Diabetic Retinopathy Study research group. Photocoagulation for diabetic macular edema. Early Treatment Diabetic Retinopathy Study report number 1. *Arch Ophthalmol* 1985;103:1796-806.
20. Early Treatment Diabetic Retinopathy Study research group. Treatment techniques and clinical guidelines for photocoagulation of diabetic macular edema. Early Treatment Diabetic Retinopathy Study Report Number 2. *Ophthalmology* 1987;94:761-74.
21. Elman MJ, Aiello LP, Beck RW, et al. Randomized trial evaluating ranibizumab plus prompt or deferred laser or triamcinolone plus prompt laser for diabetic macular edema. *Ophthalmology* 2010;117:1064-77.
22. Ip MS, Bressler SB, Antoszyk AN, et al. A randomized trial comparing intravitreal triamcinolone and focal/grid photocoagulation for diabetic macular edema: baseline features. *Retina* 2008;28:919-30.
23. Michaelides M, Kaines A, Hamilton RD, et al. A prospective randomized trial of intravitreal bevacizumab or laser therapy in the management of diabetic macular edema (BOLT study) 12-month data: report 2. *Ophthalmology* 2010;117:1078-86.
24. Mitchell P, Bandello F, Schmidt-Erfurth U, et al. The RESTORE study: ranibizumab monotherapy or combined with laser versus laser monotherapy for diabetic macular edema. *Ophthalmology* 2011;118:615-25.

- 1
- 2
- 3 25. Lovestam-Adrian M, Agardh E. Photocoagulation of diabetic macular oedema--complications
- 4 and visual outcome. *Acta Ophthalmol Scand* 2000;78:667-71.
- 5
- 6 26. Lee CM, Olk RJ. Modified grid laser photocoagulation for diffuse diabetic macular edema.
- 7 Long-term visual results. *Ophthalmology* 1991;98:1594-602.
- 8
- 9 27. Nwanze CC, Akinwale A, Adelman RA. Bevacizumab vs. Ranibizumab in Preserving or
- 10 Improving Vision in Patients with Wet, Age-Related Macular Degeneration: A Cost-
- 11 effectiveness Review. *Clinical Medicine Insights: Therapeutics* 2012;4:29-38.
- 12
- 13 28. Nguyen QD, Shah SM, Khwaja AA, et al. Two-year outcomes of the ranibizumab for edema of
- 14 the mAcula in diabetes (READ-2) study. *Ophthalmology* 2010;117:2146-51.
- 15
- 16 29. Campochiaro PA, Brown DM, Pearson A, et al. Long-term benefit of sustained-delivery
- 17 fluocinolone acetonide vitreous inserts for diabetic macular edema. *Ophthalmology*
- 18 2011;118:626-35.
- 19
- 20 30. Do DV, Schmidt-Erfurth U, Gonzalez VH, et al. The DA VINCI Study: phase 2 primary results of
- 21 VEGF Trap-Eye in patients with diabetic macular edema. *Ophthalmology* 2011;118:1819-26.
- 22
- 23 31. Ahmadi H, Ramezani A, Shoeibi N, et al. Intravitreal bevacizumab with or without
- 24 triamcinolone for refractory diabetic macular edema; a placebo-controlled, randomized
- 25 clinical trial. *Graefes Arch Clin Exp Ophthalmol* 2008;246:483-9.
- 26
- 27 32. Gillies MC, Sutter FK, Simpson JM, et al. Intravitreal triamcinolone for refractory diabetic
- 28 macular edema: two-year results of a double-masked, placebo-controlled, randomized
- 29 clinical trial. *Ophthalmology* 2006;113:1533-8.
- 30
- 31 33. Gillies MC, McAllister IL, Zhu M, et al. Intravitreal triamcinolone prior to laser treatment of
- 32 diabetic macular edema: 24-month results of a randomized controlled trial. *Ophthalmology*
- 33 2011;118:866-72.
- 34
- 35 34. Lam DS, Chan CK, Mohamed S, et al. Intravitreal triamcinolone plus sequential grid laser
- 36 versus triamcinolone or laser alone for treating diabetic macular edema: six-month
- 37 outcomes. *Ophthalmology* 2007;114:2162-7.
- 38
- 39 35. Lam DS, Lai TY, Lee VY, et al. Efficacy of 1.25 MG versus 2.5 MG intravitreal bevacizumab for
- 40 diabetic macular edema: six-month results of a randomized controlled trial. *Retina*
- 41 2009;29:292-9.
- 42
- 43 36. Massin P, Bandello F, Garweg JG, et al. Safety and efficacy of ranibizumab in diabetic
- 44 macular edema (RESOLVE Study): a 12-month, randomized, controlled, double-masked,
- 45 multicenter phase II study. *Diabetes Care* 2010;33:2399-405.
- 46
- 47 37. Soheilian M, Ramezani A, Bijanzadeh B, et al. Intravitreal bevacizumab (avastin) injection
- 48 alone or combined with triamcinolone versus macular photocoagulation as primary
- 49 treatment of diabetic macular edema. *Retina* 2007;27:1187-95.
- 50
- 51 38. Nguyen QD, Brown DM, Marcus DM, et al. Ranibizumab for diabetic macular edema: results
- 52 from 2 phase III randomized trials: RISE and RIDE. *Ophthalmology* 2012;119:789-801.
- 53
- 54
- 55
- 56
- 57
- 58
- 59
- 60

- 1  
2  
3 39. Cunningham ET, Jr., Adamis AP, Altaweel M, et al. A phase II randomized double-masked  
4 trial of pegaptanib, an anti-vascular endothelial growth factor aptamer, for diabetic macular  
5 edema. *Ophthalmology* 2005;112:1747-57.  
6  
7 40. Sultan MB, Zhou D, Loftus J, et al. A phase 2/3, multicenter, randomized, double-masked, 2-  
8 year trial of pegaptanib sodium for the treatment of diabetic macular edema.  
9 *Ophthalmology* 2011;118:1107-18.  
10  
11 41. Soheilian M, Ramezani A, Obudi A, et al. Randomized trial of intravitreal bevacizumab alone  
12 or combined with triamcinolone versus macular photocoagulation in diabetic macular  
13 edema. *Ophthalmology* 2009;116:1142-50.  
14  
15 42. Sivaprasad S, Ockrim Z, Massaoutis P, et al. Posterior hyaloid changes following intravitreal  
16 triamcinolone and macular laser for diffuse diabetic macular edema. *Retina* 2008;28:1435-  
17 42.  
18  
19 43. Pearson PA, Comstock TL, Ip M, et al. Fluocinolone acetonide intravitreal implant for diabetic  
20 macular edema: a 3-year multicenter, randomized, controlled clinical trial. *Ophthalmology*  
21 2011;118:1580-7.  
22  
23 44. Callanan D, Gupta S, Ciulla TA, et al. Efficacy and safety of combination therapy with  
24 dexamethasone intravitreal implant (DEX Implant) plus laser photocoagulation versus  
25 monotherapy with laser for treatment of diffuse diabetic macular edema (DDME) [abstract].  
26 *Invest Ophthalmol Vis Sci* 22-4-2011;52:E-Abstract 3968.  
27  
28 45. Kim Y, Kang S, Yi CH. Three-year follow-up of intravitreal triamcinolone acetonide injection  
29 and macular laser photocoagulation for diffuse diabetic macular edema [abstract]. *Invest*  
30 *Ophthalmol Vis Sci* 11-4-2010;51:E-Abstract 4260.  
31  
32 46. Elman MJ, Bressler NM, Qin H, et al. Expanded 2-year follow-up of ranibizumab plus prompt  
33 or deferred laser or triamcinolone plus prompt laser for diabetic macular edema.  
34 *Ophthalmology* 2011;118:609-14.  
35  
36 47. Nguyen QD, Shah SM, Heier JS, et al. Primary End Point (Six Months) Results of the  
37 Ranibizumab for Edema of the mAcula in diabetes (READ-2) study. *Ophthalmology*  
38 2009;116:2175-81.  
39  
40 48. Ohji M, Ishibashi T, Sr., REVEAL study group. Efficacy and safety of ranibizumab 0.5 Mg as  
41 monotherapy or adjunctive to laser versus laser monotherapy in Asian patients with visual  
42 impairment due to diabetic macular edema: 12-month results of the REVEAL Study  
43 [abstract]. *Invest Ophthalmol Vis Sci* 26-3-2012;53:E-Abstract 4664.  
44  
45 49. Mitchell P, RESTORE extension study group. 2-year safety and efficacy outcome of  
46 ranibizumab 0.5 mg in patients with visual impairment due to diabetic macular edema  
47 (DME): an interim analysis of the RESTORE extension study [abstract]. *Invest Ophthalmol Vis*  
48 *Sci* 26-3-2012;53:E-Abstract 4667.  
49  
50 50. Do DV, Campochiaro PA, Boyer DS, et al. 6 month results of the READ 3 Study: Ranibizumab  
51 for Edema of the mAcula in Diabetes [abstract]. *Invest Ophthalmol Vis Sci* 26-3-2012;53:E-  
52 Abstract 5282.  
53  
54  
55  
56  
57  
58  
59  
60

- 1
  - 2
  - 3
  - 4
  - 5
  - 6
  - 7
  - 8
  - 9
  - 10
  - 11
  - 12
  - 13
  - 14
  - 15
  - 16
  - 17
  - 18
  - 19
  - 20
  - 21
  - 22
  - 23
  - 24
  - 25
  - 26
  - 27
  - 28
  - 29
  - 30
  - 31
  - 32
  - 33
  - 34
  - 35
  - 36
  - 37
  - 38
  - 39
  - 40
  - 41
  - 42
  - 43
  - 44
  - 45
  - 46
  - 47
  - 48
  - 49
  - 50
  - 51
  - 52
  - 53
  - 54
  - 55
  - 56
  - 57
  - 58
  - 59
  - 60
51. Jorge R, Nepomuceno AB, Takaki E, et al. A prospective randomized trial of intravitreal bevacizumab versus ranibizumab for the management of refractory diabetic macular edema [abstract]. *Invest Ophthalmol Vis Sci* 26-3-2012;53:E-Abstract 347.
52. Michaelides M, Fraser-Bell S, Hamilton R, et al. Macular perfusion determined by fundus fluorescein angiography at the 4-month time point in a prospective randomized trial of intravitreal bevacizumab or laser therapy in the management of diabetic macular edema (Bolt Study): Report 1. *Retina* 2010;30:781-6.
53. Faghihi H, Esfahani MR, Harandi ZA, et al. Intravitreal bevacizumab vs. combination of intravitreal bevacizumab plus macular photocoagulation in clinically significant diabetic macular edema: 6 months results of a randomized clinical trial. *Iranian J of Ophthalmol* 2010;22:21-6.
54. Soheilian M, Garfami KH, Ramezani A, et al. Two-year results of a randomized trial of intravitreal bevacizumab alone or combined with triamcinolone versus laser in diabetic macular edema. *Retina* 2012;32:314-21.
55. Lim JW, Lee HK, Shin MC. Comparison of intravitreal bevacizumab alone or combined with triamcinolone versus triamcinolone in diabetic macular edema: a randomized clinical trial. *Ophthalmologica* 2012;227:100-6.
56. Oliveira Neto HL, Andrade RE, Casella M, et al. A randomized clinical trial to compare the efficacy and safety of isolated or combined intravitreal injection of triamcinolone acetonide and bevacizumab for diabetic macular edema ATEMED protocol - A Brazilian clinical trial [abstract]. *Invest Ophthalmol Vis Sci* 22-4-2011;52:E-Abstract 5331.
57. Adamis AP, Altaweel M, Bressler NM, et al. Changes in retinal neovascularization after pegaptanib (Macugen) therapy in diabetic individuals. *Ophthalmology* 2006;113:23-8.
58. Do DV, Nguyen QD, Boyer D, et al. One-year outcomes of the DA VINCI Study of VEGF Trap-Eye in eyes with diabetic macular edema. *Ophthalmology* 24-4-2012.
59. Haller JA, Kuppermann BD, Blumenkranz MS, et al. Randomized controlled trial of an intravitreal dexamethasone drug delivery system in patients with diabetic macular edema. *Arch Ophthalmol* 2010;128:289-96.
60. Campochiaro PA, Brown DM, Pearson A, et al. Sustained delivery fluocinolone acetonide vitreous inserts provide benefit for at least 3 Years in patients with diabetic macular edema. *Ophthalmology* 21-6-2012.
61. Diabetic Retinopathy Clinical Research Network (DRCR.net), Beck RW, Edwards AR, et al. Three-year follow-up of a randomized trial comparing focal/grid photocoagulation and intravitreal triamcinolone for diabetic macular edema. *Arch Ophthalmol* 2009;127:245-51.
62. Ockrim ZK, Sivaprasad S, Falk S, et al. Intravitreal triamcinolone versus laser photocoagulation for persistent diabetic macular oedema. *Br J Ophthalmol* 2008;92:795-9.
63. Bressler NM, Edwards AR, Beck RW, et al. Exploratory analysis of diabetic retinopathy progression through 3 years in a randomized clinical trial that compares intravitreal triamcinolone acetonide with focal/grid photocoagulation. *Arch Ophthalmol* 2009;127:1566-71.

- 1  
2  
3 64. Diabetic Retinopathy Clinical Research Network. A randomized trial comparing intravitreal  
4 triamcinolone acetonide and focal/grid photocoagulation for diabetic macular edema.  
5 *Ophthalmology* 2008;115:1447-9.  
6  
7 65. Ford J, Elders A, Shyangdan D, et al. The relative clinical effectiveness of ranibizumab and  
8 bevacizumab in diabetic macular oedema: an indirect comparison. *BMJ* 2012;in press.  
9  
10 66. Chakravarthy U, Harding SP, Rogers CA, et al. Ranibizumab versus bevacizumab to treat  
11 neovascular age-related macular degeneration: one-year findings from the IVAN randomized  
12 trial. *Ophthalmology* 2012;119:1399-411.  
13  
14 67. Martin DF, Maguire MG, Fine SL, et al. Ranibizumab and bevacizumab for treatment of  
15 neovascular age-related macular degeneration: two-year results. *Ophthalmology*  
16 2012;119:1388-98.  
17  
18 68. Campbell RJ, Gill SS, Bronskill SE, et al. Adverse events with intravitreal injection of vascular  
19 endothelial growth factor inhibitors: nested case-control study. *BMJ* 2012;345:e4203.  
20  
21 69. Van der Reis MI, La Heij EC, De Jong-Hesse Y, et al. A systematic review of the adverse events  
22 of intravitreal anti-vascular endothelial growth factor injections. *Retina-the Journal of*  
23 *Retinal and Vitreous Diseases* 2011;31:1449-69.  
24  
25 70. Fung AE, Rosenfeld PJ, Reichel E. The International Intravitreal Bevacizumab Safety Survey:  
26 using the internet to assess drug safety worldwide. *Br J Ophthalmol* 2006;90:1344-9.  
27  
28 71. Elbendary AM, Shahin MM. Intravitreal diclofenac versus intravitreal triamcinolone  
29 acetamide in the treatment of diabetic macular edema. *Retina* 2011;31:2058-64.  
30  
31 72. Sfikakis PP, Grigoropoulos V, Emfietzoglou I, et al. Infliximab for diabetic macular edema  
32 refractory to laser photocoagulation: a randomized, double-blind, placebo-controlled,  
33 crossover, 32-week study. *Diabetes Care* 2010;33:1523-8.  
34  
35 73. Keech AC, Mitchell P, Summanen PA, et al. Effect of fenofibrate on the need for laser  
36 treatment for diabetic retinopathy (FIELD study): a randomised controlled trial. *Lancet* 17-  
37 11-2007;370:1687-97.  
38  
39 74. PKC-DMES Study Group. Effect of ruboxistaurin in patients with diabetic macular edema:  
40 thirty-month results of the randomized PKC-DMES clinical trial. *Arch Ophthalmol*  
41 2007;125:318-24.  
42  
43 75. PKC-DMES Study Group. Effect of ruboxistaurin on visual loss in patients with diabetic  
44 retinopathy. *Ophthalmology* 2006;113:2221-30.  
45  
46 76. Fong DS, Strauber SF, Aiello LP, et al. Comparison of the modified Early Treatment Diabetic  
47 Retinopathy Study and mild macular grid laser photocoagulation strategies for diabetic  
48 macular edema. *Arch Ophthalmol* 2007;125:469-80.  
49  
50 77. Health Canada. Reports of eye inflammation, endophthalmitis, and Toxic Anterior Segment  
51 Syndrome (TASS) following off-label intravitreal use of Avastin (bevacizumab). 2008 [cited  
52 2012 Oct 24];Available from: URL: [http://www.hc-sc.gc.ca/dhp-mps/medeff/advisories-  
53 avis/prof/2008/avastin\\_4\\_hpc-cps-eng.php](http://www.hc-sc.gc.ca/dhp-mps/medeff/advisories-avis/prof/2008/avastin_4_hpc-cps-eng.php)  
54  
55  
56  
57  
58  
59  
60

- 1  
2  
3 78. Curtis LH, Hammill BG, Schulman KA, et al. Risks of mortality, myocardial infarction,  
4 bleeding, and stroke associated with therapies for age-related macular degeneration. *Arch*  
5 *Ophthalmol* 2010;128:1273-9.  
6  
7 79. Gower EW, Cassard S, Chu L, et al. Adverse event rates following intravitreal injection of  
8 Avastin or Lucentis for treating age-related macular degeneration [abstract]. *Invest*  
9 *Ophthalmol Vis Sci* 22-4-2011;52:E-Abstract 6644.  
10  
11 80. General Medical Council. Prescribing medicines for use outside the terms of their licence  
12 (off-label). 2012 [cited 2012 Oct 24];Available from: URL: [http://www.gmc-](http://www.gmc-uk.org/guidance/ethical_guidance/prescriptions_faqs.asp#10)  
13 [uk.org/guidance/ethical\\_guidance/prescriptions\\_faqs.asp#10](http://www.gmc-uk.org/guidance/ethical_guidance/prescriptions_faqs.asp#10)  
14  
15 81. U.S.Food and Drug Administration. Off-Label" and investigational use of marketed drugs,  
16 biologics, and medical devices - Information Sheet. 2011 [cited 2012 Oct 24];Available from:  
17 URL: <http://www.fda.gov/RegulatoryInformation/Guidances/ucm126486.htm>  
18  
19 82. Alimera Sciences. Alimera Sciences' ILUVIEN® Receives Marketing Authorization in France for  
20 the Treatment of Chronic Diabetic Macular Edema. 2012 [cited 2012 Oct 24];Available from:  
21 URL: <http://investor.alimerasciences.com/releasedetail.cfm?ReleaseID=692876>  
22  
23 83. National Institute for Health and Clinical Excellence. Ranibizumab for the treatment of  
24 diabetic macular oedema:TA237. 2011 [cited 2012 Oct 24];Available from: URL:  
25 [http://publications.nice.org.uk/ranibizumab-for-the-treatment-of-diabetic-macular-](http://publications.nice.org.uk/ranibizumab-for-the-treatment-of-diabetic-macular-oedema-ta237)  
26 [oedema-ta237](http://publications.nice.org.uk/ranibizumab-for-the-treatment-of-diabetic-macular-oedema-ta237)  
27  
28 84. Rajendram R, Fraser-Bell S, Kaines A, et al. A 2-Year Prospective Randomized Controlled Trial  
29 of Intravitreal Bevacizumab or Laser Therapy (BOLT) in the Management of Diabetic Macular  
30 Edema: 24-Month Data: Report 3. *Arch Ophthalmol* 9-4-2012.  
31  
32 85. Sivaprasad S, Dorin G. Subthreshold diode laser micropulse photocoagulation for the  
33 treatment of diabetic macular edema. *Expert Review of Medical Devices* 2012;9:189-97.  
34  
35 86. Cho WB, Moon JW, Kim HC. Intravitreal triamcinolone and bevacizumab as adjunctive  
36 treatments to panretinal photocoagulation in diabetic retinopathy. *Br J Ophthalmol*  
37 2010;94:858-63.  
38  
39 87. Googe J, Brucker AJ, Bressler NM, et al. Randomized trial evaluating short-term effects of  
40 intravitreal ranibizumab or triamcinolone acetonide on macular edema after focal/grid laser  
41 for diabetic macular edema in eyes also receiving panretinal photocoagulation. *Retina*  
42 2011;31:1009-27.  
43  
44 88. Faghihi H, Roohipoor R, Mohammadi SF, et al. Intravitreal bevacizumab versus combined  
45 bevacizumab-triamcinolone versus macular laser photocoagulation in diabetic macular  
46 edema. *Eur J Ophthalmol* 2008;18:941-8.  
47  
48 89. Figueroa MS, Contreras I, Noval S. Surgical and anatomical outcomes of pars plana  
49 vitrectomy for diffuse nontractional diabetic macular edema. *Retina* 2008;28:420-6.  
50  
51 90. Isaac DL, Abud MB, Frantz KA, et al. Comparing intravitreal triamcinolone acetonide and  
52 bevacizumab injections for the treatment of diabetic macular oedema: a randomized  
53 double-blind study. *Acta Ophthalmol* 2012;90:56-60.  
54  
55  
56  
57  
58  
59  
60



- 1  
2  
3 91. Paccola L, Costa RA, Folgosa MS, et al. Intravitreal triamcinolone versus bevacizumab for  
4 treatment of refractory diabetic macular oedema (IBEME study). *Br J Ophthalmol*  
5 2008;92:76-80.  
6
- 7 92. Prager SG, Kriechbaum K, Mylonas G, et al. Comparison of intravitreally applied bevacizumab  
8 and triamcinolone on diabetic macular edema [abstract]. *Invest Ophthalmol Vis Sci* 11-4-  
9 2010;51:E-Abstract 4262.  
10
- 11 93. Ozturk BT, Kerimoglu H, Bozkurt B, et al. Comparison of intravitreal bevacizumab and  
12 ranibizumab treatment for diabetic macular edema. *J Ocul Pharmacol Ther* 2011;27:373-7.  
13
- 14 94. Marey HM, Ellakwa AF. Intravitreal bevacizumab alone or combined with triamcinolone  
15 acetate as the primary treatment for diabetic macular edema. *Clin Ophthalmol*  
16 2011;5:1011-6.  
17
- 18 95. Shahin MM, El-Lakkany RS. A prospective, randomized comparison of intravitreal  
19 triamcinolone acetate versus intravitreal bevacizumab (avastin) in diffuse diabetic  
20 macular edema. *Middle East Afr J Ophthalmol* 2010;17:250-3.  
21
- 22 96. Loftus JV, Sultan MB, Pleil AM, et al. Changes in vision- and health-related quality of life in  
23 patients with diabetic macular edema treated with pegaptanib sodium or sham.  
24 *Investigative Ophthalmology & Visual Science* 2011;52:7498-505.  
25
- 26 97. Ferrone PJ, Jonisch J. Ranibizumab dose comparison for the treatment of diabetic macular  
27 edema [abstract]. *Invest Ophthalmol Vis Sci* 2011;52:E-Abstract 5333.  
28
- 29 98. Solaiman KA, Diab MM, Abo-Elenin M. Intravitreal bevacizumab and/or macular  
30 photocoagulation as a primary treatment for diffuse diabetic macular edema. *Retina*  
31 2010;30:1638-45.  
32
- 33 99. Diabetic Retinopathy Clinical Research Network, Scott IU, Edwards AR, et al. A phase II  
34 randomized clinical trial of intravitreal bevacizumab for diabetic macular edema.  
35 *Ophthalmology* 2007;114:1860-7.  
36
- 37 100. Lee SJ, Kim ET, Moon YS. Intravitreal bevacizumab alone versus combined with macular  
38 photocoagulation in diabetic macular edema. *Korean J Ophthalmol* 2011;25:299-304.  
39
- 40 101. Audren F, Lecleire-Collet A, Erginay A, et al. Intravitreal triamcinolone acetate for diffuse  
41 diabetic macular edema: phase 2 trial comparing 4 mg vs 2 mg. *Am J Ophthalmol*  
42 2006;142:794-9.  
43
- 44 102. Audren F, Erginay A, Haouchine B, et al. Intravitreal triamcinolone acetate for diffuse  
45 diabetic macular oedema: 6-month results of a prospective controlled trial. *Acta Ophthalmol*  
46 *Scand* 2006;84:624-30.  
47
- 48 103. Avitabile T, Longo A, Reibaldi A. Intravitreal triamcinolone compared with macular laser grid  
49 photocoagulation for the treatment of cystoid macular edema. *Am J Ophthalmol*  
50 2005;140:695-702.  
51
- 52 104. Bandello F, Pognuz DR, Pirracchio A, et al. Intravitreal triamcinolone acetate for florid  
53 proliferative diabetic retinopathy. *Graefes Arch Clin Exp Ophthalmol* 2004;42:1024-7.  
54  
55  
56  
57  
58  
59  
60

- 1  
2  
3 105. Bonini MA, Jorge R, Barbosa JC, et al. Intravitreal injection versus sub-Tenon's infusion of  
4 triamcinolone acetate for refractory diabetic macular edema: A randomized clinical trial.  
5 *Invest Ophthalmol Vis Sci* 2005;46:3845-9.  
6  
7 106. Cellini M, Pazzaglia A, Zamparini E, et al. Intravitreal vs. subtenon triamcinolone acetate  
8 for the treatment of diabetic cystoid macular edema. *BMC Ophthalmol* 2008;8:5TN.  
9  
10 107. Cardillo JA, Melo LA, Jr., Costa RA, et al. Comparison of intravitreal versus posterior sub-  
11 Tenon's capsule injection of triamcinolone acetate for diffuse diabetic macular edema.  
12 *Ophthalmology* 2005;112:1557-63.  
13  
14 108. Chung EJ, Freeman WR, Azen SP, et al. Comparison of combination posterior sub-tenon  
15 triamcinolone and modified grid laser treatment with intravitreal triamcinolone treatment in  
16 patients with diffuse diabetic macular edema. *Yonsei Med J* 31-12-2008;49:955-64.  
17  
18 109. Dehghan MH, Ahmadi H, Ramezani A, et al. A randomized, placebo-controlled clinical trial  
19 of intravitreal triamcinolone for refractory diabetic macular edema. *Int Ophthalmol*  
20 2008;28:7-17.  
21  
22 110. Diabetic Retinopathy Clinical Research Network, Chew E, Strauber S, et al. Randomized trial  
23 of peribulbar triamcinolone acetate with and without focal photocoagulation for mild  
24 diabetic macular edema: a pilot study. *Ophthalmology* 2007;114:1190-6.  
25  
26 111. Gil AL, Azevedo MJ, Tomasetto GG, et al. Treatment of diffuse diabetic maculopathy with  
27 intravitreal triamcinolone and laser photocoagulation: randomized clinical trial with  
28 morphological and functional evaluation. *Arquivos Brasileiros de Oftalmologia* 2011;74:343-  
29 7.  
30  
31 112. Entezari M, Ahmadi H, Dehghan MH, et al. Posterior sub-tenon triamcinolone for  
32 refractory diabetic macular edema: a randomized clinical trial. *Eur J Ophthalmol*  
33 2005;15:746-50.  
34  
35 113. Hauser D, Bukelman A, Pokroy R, et al. Intravitreal triamcinolone for diabetic macular  
36 edema: comparison of 1, 2, and 4 mg. *Retina* 2008;28:825-30.  
37  
38 114. Jonas JB, Kampeter BA, Harder B, et al. Intravitreal triamcinolone acetate for diabetic  
39 macular edema: A prospective, randomized study. *J Ocul Pharmacol Ther* 2006;22:200-7.  
40  
41 115. Jousseaume AM, Weiss C, Bauer D, et al. Triamcinolone versus inner-limiting membrane peeling  
42 in persistent diabetic macular edema (TIME study): design issues and implications. *Graefes*  
43 *Arch Clin Exp Ophthalmol* 2007;245:1781-7.  
44  
45 116. Kaderli B, Avci R. Comparison of topical and subconjunctival anesthesia in intravitreal  
46 injection administrations. *Eur J Ophthalmol* 2006;16:718-21.  
47  
48 117. Kang SW, Sa HS, Cho HY, et al. Macular grid photocoagulation after intravitreal  
49 triamcinolone acetate for diffuse diabetic macular edema. *Arch Ophthalmol*  
50 2006;124:653-8.  
51  
52 118. Kim JE, Pollack JS, Miller DG, et al. ISIS-DME: a prospective, randomized, dose-escalation  
53 intravitreal steroid injection study for refractory diabetic macular edema. *Retina*  
54 2008;28:735-40.  
55  
56  
57  
58  
59  
60



- 1  
2  
3 119. Lam DS, Chan CK, Mohamed S, et al. A prospective randomised trial of different doses of  
4 intravitreal triamcinolone for diabetic macular oedema. *Br J Ophthalmol* 2007;91:199-203.  
5  
6 120. Lee HY, Lee SY, Park JS. Comparison of photocoagulation with combined intravitreal  
7 triamcinolone for diabetic macular edema. *Korean J Ophthalmol* 2009;23:153-8.  
8  
9 121. Maia OO, Jr., Takahashi BS, Costa RA, et al. Combined laser and intravitreal triamcinolone for  
10 proliferative diabetic retinopathy and macular edema: one-year results of a randomized  
11 clinical trial. *Am J Ophthalmol* 2009;147:291-7.  
12  
13 122. Massin P, Audren F, Haouchine B, et al. Intravitreal triamcinolone acetonide for diabetic  
14 diffuse macular edema: preliminary results of a prospective controlled trial. *Ophthalmology*  
15 2004;111:218-24.  
16  
17 123. Mohamed S, Leung GM, Chan CK, et al. Factors associated with variability in response of  
18 diabetic macular oedema after intravitreal triamcinolone. *Clin Experiment Ophthalmol*  
19 2009;37:602-8.  
20  
21 124. Nakamura A, Shimada Y, Horio N, et al. Vitrectomy for diabetic macular edema with  
22 posterior subtenon injection of triamcinolone acetonide. [Japanese]. *Folia Ophthalmol*  
23 *Japonica* 2004;55:958-62.  
24  
25 125. Spandau UH, Derse M, Schmitz-Valckenberg P, et al. Dosage dependency of intravitreal  
26 triamcinolone acetonide as treatment for diabetic macular oedema. *Br J Ophthalmol*  
27 2005;89:999-1003.  
28  
29 126. Tunc M, Onder HI, Kaya M. Posterior sub-Tenon's capsule triamcinolone injection combined  
30 with focal laser photocoagulation for diabetic macular edema. *Ophthalmology*  
31 2005;112:1086-91.  
32  
33 127. Verma LK, Vivek MB, Kumar A, et al. A prospective controlled trial to evaluate the adjunctive  
34 role of posterior subtenon triamcinolone in the treatment of diffuse diabetic macular  
35 edema. *J Ocul Pharmacol Ther* 2004;20:277-84.  
36  
37 128. Wickremasinghe SS, Rogers SL, Gillies MC, et al. Retinal vascular caliber changes after  
38 intravitreal triamcinolone treatment for diabetic macular edema. *Invest Ophthalmol Vis Sci*  
39 2008;49:4707-11.  
40  
41 129. Yalcinbayir O, Gelisken O, Kaderli B, et al. Intravitreal versus sub-Tenon posterior  
42 triamcinolone injection in bilateral diffuse diabetic macular edema. *Ophthalmologica*  
43 2011;225:222-7.  
44  
45 130. Haller JA, Bandello F, Belfort R, Jr., et al. Randomized, sham-controlled trial of  
46 dexamethasone intravitreal implant in patients with macular edema due to retinal vein  
47 occlusion. *Ophthalmology* 2010;117:1134-46.  
48  
49 131. Haller JA, Dugel P, Weinberg DV, et al. Evaluation of the safety and performance of an  
50 applicator for a novel intravitreal dexamethasone drug delivery system for the treatment of  
51 macular edema. *Retina* 2009;29:46-51.  
52  
53 132. Kuppermann BD, Blumenkranz MS, Haller JA, et al. Randomized controlled study of an  
54 intravitreal dexamethasone drug delivery system in patients with persistent macular  
55 edema. *Arch Ophthalmol* 2007;125:309-17.  
56  
57  
58  
59  
60

- 1  
2  
3 133. Boyer DS, Faber D, Gupta S, et al. Dexamethasone intravitreal implant for treatment of  
4 diabetic macular edema in vitrectomized patients. *Retina* 2011;31:915-23.  
5  
6 134. Campochiaro PA, Hafiz G, Shah SM, et al. Sustained ocular delivery of fluocinolone acetonide  
7 by an intravitreal insert. *Ophthalmology* 2010;117:1393-9.  
8  
9 135. Brown DM, Nguyen QD, Rubio RG, et al. Ranibizumab for Diabetic Macular Edema (DME):  
10 24-Month Efficacy and Safety Results of RISE - a Phase 3 Randomized Controlled Trial  
11 [abstract]. *Invest Ophthalmol Vis Sci* 22-4-2011;52:E-Abstract 6647.  
12  
13 136. Boyer D, Sy J, Rundle AC, et al. Ranibizumab (Anti-VEGF) for vision loss due to diabetic  
14 macular edema - results of two phase III randomized trials [abstract]. *71st Scientific Sessions*  
15 *June 24 - 28, 2011, San Diego Convention Center - San Diego, California* 2011;Abstract No,  
16 133-LBOR.  
17  
18 137. Gillies MC, Islam FM, Zhu M, et al. Efficacy and safety of multiple intravitreal triamcinolone  
19 injections for refractory diabetic macular oedema. *Br J Ophthalmol* 2007;91:1323-6.  
20  
21 138. Gillies MC, Simpson JM, Gaston C, et al. Five-year results of a randomized trial with open-  
22 label extension of triamcinolone acetonide for refractory diabetic macular edema.  
23 *Ophthalmology* 2009;116:2182-7.  
24  
25 139. Sutter FK, Simpson JM, Gillies MC. Intravitreal triamcinolone for diabetic macular edema  
26 that persists after laser treatment: three-month efficacy and safety results of a prospective,  
27 randomized, double-masked, placebo-controlled clinical trial. *Ophthalmology*  
28 2004;111:2044-9.  
29  
30 140. Soheilian M, Ramezani A, Yaseri M, et al. Initial macular thickness and response to treatment  
31 in diabetic macular edema. *Retina* 2011;31:1564-73.  
32  
33  
34  
35  
36  
37  
38  
39  
40  
41  
42  
43  
44  
45  
46  
47  
48  
49  
50  
51  
52  
53  
54  
55  
56  
57  
58  
59  
60

## Appendix 1: Methods of the literature search

### Searches for clinical trials

*Ovid MEDLINE 1948-July week 2, 2012 and Ovid MEDLINE(R) In-Process & Other Non-Indexed Citations July 11, 2012*

1. Diabetic Retinopathy/dt [Drug Therapy]
2. Macular Edema/dt [Drug Therapy]
3. (diabet\* adj2 macular adj (edema or oedema)).tw.
4. (diabet\* adj2 maculopathy).tw.
5. (diabet\* adj2 retinopathy).tw.
6. 1 or 2 or 3 or 4 or 5
7. (ranibizumab or lucentis or bevacizumab or avastin or pegaptanib or macugen or aflibercept or vegf trap-eye or steroid\* or corticosteroid\* or dexamethasone or fluocinolone or triamcinolone or anti-VEGF\* or anti-vascular endothelial growth factor\*).tw.
8. exp Vascular Endothelial Growth Factor A/
9. exp Fluocinolone Acetonide/
10. exp Triamcinolone/
11. 7 or 8 or 9 or 10
12. 6 and 11
13. randomized controlled trial.pt.
14. controlled clinical trial.pt.
15. (masked or sham or placebo or control group or random\*).tw.
16. 13 or 14 or 15
17. 12 and 16
18. (case reports or editorial or letter or review).pt.
19. 17 not 18
20. limit 19 to humans

*Embase 1947 to 2012 Week 27*

1. (ranibizumab or lucentis or bevacizumab or avastin or pegaptanib or macugen or aflibercept or vegf trap-eye or dexamethasone or fluocinolone or triamcinolone or anti-VEGF\* or anti-vascular endothelial growth factor\*).m\_titl.
2. (diabetic macular edema or diabetic macular oedema or diabetic retinopathy or diabetic maculopathy).m\_titl.
3. 1 and 2
4. random\*.tw.
5. 3 and 4

34

1  
2  
3  
4  
5 *Cochrane Central Register of Controlled Trials, Issue 7 of 12, July 2012*

6  
7 ranibizumab or lucentis or bevacizumab or avastin or pegaptanib or macugen or aflibercept or vegf  
8 trap-eye or steroid\* or corticosteroid\* or dexamethasone or fluocinolone or triamcinolone or anti-  
9 VEGF\* or anti-vascular endothelial growth factor\* in Record Title and diabetic macular edema or  
10 diabetic macular oedema or diabetic retinopathy or diabetic maculopathy in Record Title

11  
12  
13 *Web of Science® – with Conference Proceedings (updated 2012-07-12)*

14  
15 Title=(ranibizumab or lucentis or bevacizumab or avastin or pegaptanib or macugen or aflibercept or  
16 vegf trap-eye or steroid\* or corticosteroid\* or dexamethasone or fluocinolone or triamcinolone or  
17 anti-VEGF\* or anti-vascular endothelial growth factor\*) AND Title=(diabetic macular edema or  
18 diabetic macular oedema or diabetic retinopathy or diabetic maculopathy) AND Title=(random\*)

19  
20  
21  
22 **Searches for systematic reviews**

23  
24  
25 *Ovid MEDLINE(R) Daily Update July 11, 2012, Ovid MEDLINE(R) In-Process & Other Non-*  
26 *Indexed Citations July 11, 2012*

- 27  
28 1. Diabetic Retinopathy/dt [Drug Therapy]  
29 2. Macular Edema/dt [Drug Therapy]  
30 3. (diabet\* adj2 macular adj (edema or oedema)).tw.  
31 4. (diabet\* adj2 maculopathy).tw.  
32 5. (diabet\* adj2 retinopathy).tw.  
33 6. 1 or 2 or 3 or 4 or 5  
34 7. (ranibizumab or lucentis or bevacizumab or avastin or pegaptanib or macugen or aflibercept or  
35 vegf trap-eye or steroid\* or corticosteroid\* or dexamethasone or fluocinolone or triamcinolone or  
36 anti-VEGF\* or anti-vascular endothelial growth factor\*).tw.  
37 8. exp Vascular Endothelial Growth Factor A/  
38 9. exp Fluocinolone Acetonide/  
39 10. exp Triamcinolone/  
40 11. 7 or 8 or 9 or 10  
41 12. 6 and 11  
42 13. (systematic review or meta-analysis or pubmed or medline).tw.  
43 14. meta-analysis.pt.  
44 15. cochrane.af.  
45 16. 13 or 14 or 15  
46 17. 12 and 16  
47  
48  
49  
50  
51  
52  
53  
54  
55  
56  
57  
58  
59  
60

1  
2  
3 *Cochrane Database of Systematic Reviews and Technology Assessments Database, Cochrane Library*  
4 *July Issue, 2012*

5  
6 "ranibizumab or lucentis or bevacizumab or avastin or pegaptanib or macugen or aflibercept or vegf  
7 trap-eye or steroid\* or corticosteroid\* or dexamethasone or fluocinolone or triamcinolone or anti-  
8 VEGF\* or anti-vascular endothelial growth factor\* in Record Title and diabetic macular edema or  
9 diabetic macular oedema or diabetic retinopathy or diabetic maculopathy in Record Title

#### 14 **Searches for safety and adverse events**

15  
16 *Ovid MEDLINE(R) Daily Update July 11, 2012, Ovid MEDLINE(R) In-Process & Other Non-*  
17 *Indexed Citations July 11, 2012 ; Embase 1980to 2012 week 27*

- 18  
19  
20 1. (ranibizumab or lucentis or bevacizumab or avastin or pegaptanib or aflibercept or vegf trap-eye  
21 or macugen or dexamethasone or fluocinolone or triamcinolone or anti-VEGF\* or anti-vascular  
22 endothelial growth factor\*).m\_titl.
- 23  
24 2. (diabetic macular edema or diabetic macular oedema or diabetic retinopathy or diabetic  
25 maculopathy).m\_titl.
- 26  
27 3. 1 and 2
- 28  
29 4. (risk or safety or adverse or harm or pharmacovigilance).tw.
- 30  
31 5. (side-effect\* or precaution\* or warning\* or contraindication\$ or contra-indication\* or tolerability  
32 or toxic\*).tw.
- 33  
34 6. 4 or 5
- 35  
36 7. 3 and 6

#### 37 **Searches of the annual meeting abstracts (for trials, reviews and safety studies)**

- 38  
39 • ARVO (Association for Research in Vision and Ophthalmology) (2002 to 2012)
- 40  
41 • ADA (American Diabetes Association) (2002-2012)
- 42  
43 • EASD (European Association for the Study of Diabetes) (2002-2012)
- 44  
45

#### 46 **Other searches**

47  
48 *Web sites of the following*

- 49  
50 • Drugs@FDA: FDA Approved Drug Products
- 51  
52 • European Medicines Association
- 53  
54 • ClinicalTrials.gov
- 55  
56 • EU Clinical Trials Register

57 National Institute for Health and Clinical Excellence

**Appendix 2: Ongoing Trials in ClinicalTrials.gov**

- Schmidt-Erfurth and colleagues are comparing ranibizumab and bevacizumab in DME (NCT00545870)
- TRIASTIN study is comparing ranibizumab, triamcinolone and sham injection (NCT00682539)
- Maturi and colleagues are comparing bevacizumab plus dexamethasone with bevacizumab alone (NCT01309451)
- IBeTA study (Jorge and colleagues) is comparing bevacizumab (1.5mg) plus laser, triamcinolone (4mg) plus laser with laser alone (NCT00997191)
- Chaudhry and colleagues are evaluating ranibizumab in patients who have failed with 3-6 injections of bevacizumab (NCT01253694)
- MIDME study (Pfizer) is comparing pegaptanib 0.3mg with sham injection. NCT01175070
- Figueira and colleagues are comparing pegaptanib plus laser with laser alone (NCT01281098)
- RESPOND (Novartis) is comparing ranibizumab (0.5mg) alone with ranibizumab plus laser or laser alone (NCT01135914)
- RETAIN (Novartis) study is comparing two different ranibizumab algorithms; “treat and extend” versus as needed (NCT01171976)
- RED-ES (Novartis) is comparing ranibizumab with laser in patients with visual impairment due to DME (NCT00901186)
- READ 3 study (Do and colleagues) are comparing two doses of ranibizumab 0.5 mg and 2 mg (NCT01077401)
- VIVID-DME and VISTA DME studies (Bayer) are comparing aflibercept with laser. (NCT01331681 and NCT01363440)
- Gillies and colleagues are comparing bevacizumab with dexamethasone (NCT01298076)
- Soheilian and colleagues are performing a phase I study looking at the use of diclofenac compared with bevacizumab in DME (NCT00999791)
- López-Miranda and colleagues are comparing the use of bevacizumab before and after laser therapy (NCT00804206)
- NEVANAC study is comparing triamcinolone alone with triamcinolone plus nepafenac (NSAID) (NCT00780780)
- Elman and colleagues are comparing laser alone, laser combined with an intravitreal injection of triamcinolone, laser combined with an intravitreal injection of ranibizumab, or intravitreal injection of ranibizumab alone (NCT00444600)
- BRDME (Schlingemann and colleagues) study is comparing the use of bevacizumab and ranibizumab in the treatment of patients with DME (OCT central area thickness > 275 µm) (NCT01635790)
- Wiley and colleagues are comparing bevacizumab and ranibizumab in patients with DME in at least one eye (NCT01610557)
- Protocol T study (Wells and colleagues) is comparing effectiveness of aflibercept, bevacizumab, and ranibizumab for DME (NCT01627249)
- Allergan funded study comparing safety and efficacy of 700 µg dexamethasone implant against 0.5 mg ranibizumab in patients with DME (NCT01492400)
- Pfizer funded study comparing effectiveness of 0.3 mg pegaptanib against sham injection (NCT01100307)

- 1
  - 2
  - 3
  - 4
  - 5
  - 6
  - 7
  - 8
  - 9
  - 10
  - 11
  - 12
  - 13
  - 14
  - 15
  - 16
  - 17
  - 18
  - 19
  - 20
  - 21
  - 22
  - 23
  - 24
  - 25
  - 26
  - 27
  - 28
  - 29
  - 30
  - 31
  - 32
  - 33
  - 34
  - 35
  - 36
  - 37
  - 38
  - 39
  - 40
  - 41
  - 42
  - 43
  - 44
  - 45
  - 46
  - 47
  - 48
  - 49
  - 50
  - 51
  - 52
  - 53
  - 54
  - 55
  - 56
  - 57
  - 58
  - 59
  - 60
- Allergan funded study comparing safety and efficacy of an intravitreal dexamethasone implant (700 µg and 350 µg) against sham in patients with DME (NCT00168389)
  - Allergan funded study comparing safety and efficacy of an intravitreal dexamethasone implant (700 µg and 350 µg) against sham in patients with DME (NCT00168337)

For peer review only

1  
2  
3  
4  
5  
6  
7  
8  
9  
10  
11  
12  
13  
14  
15  
16  
17  
18  
19  
20  
21  
22  
23  
24  
25  
26  
27  
28  
29  
30  
31  
32  
33  
34  
35  
36  
37  
38  
39  
40  
41  
42  
43  
44  
45  
46  
47  
48  
49  
50  
51  
52  
53  
54  
55  
56  
57  
58  
59  
60

Figure 1 - PRISMA

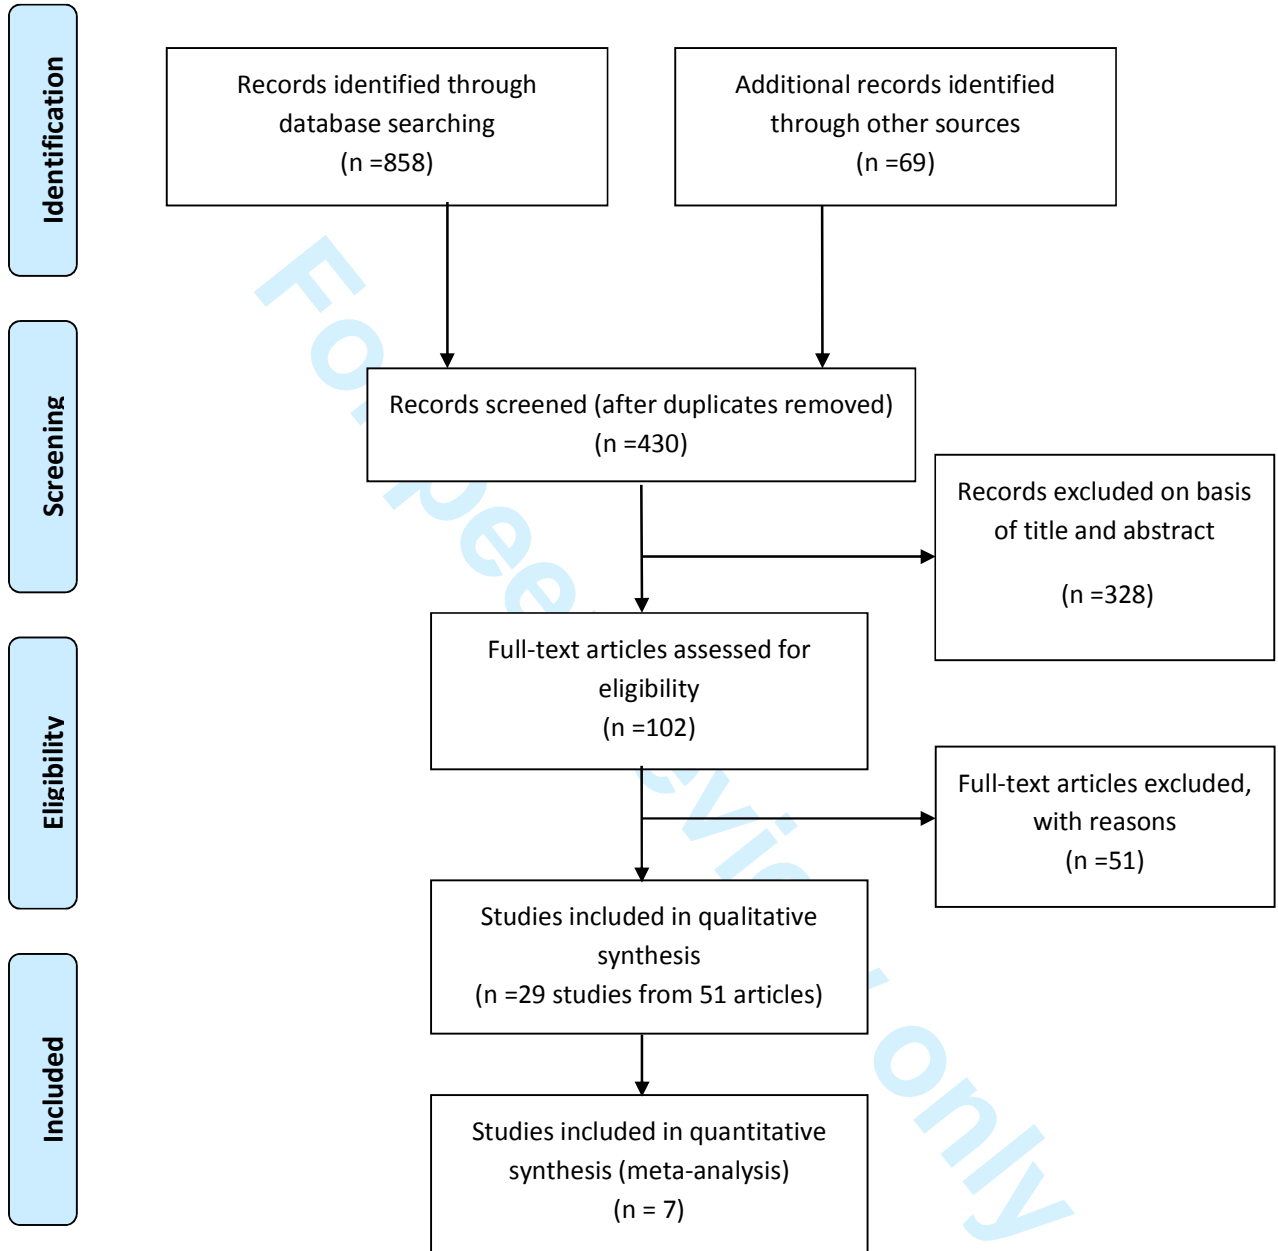



Figure 2 Ranibizumab 0.5mg alone versus laser alone

2.1 Mean change in BCVA

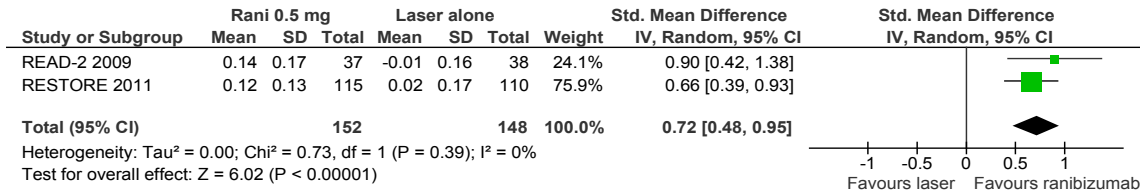

2.2 Proportion with >15 letter gain

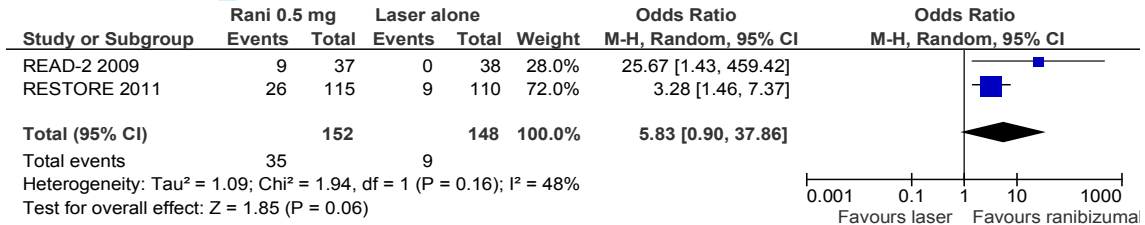

2.3 CMT

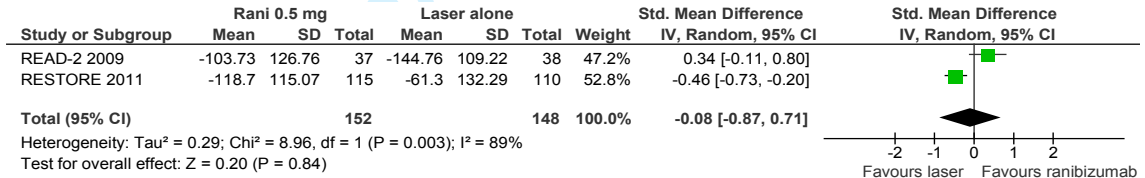

Figure 3 Ranibizumab 0.5mg plus laser versus ranibizumab 0.5mg alone

3.1 Mean change in BCVA

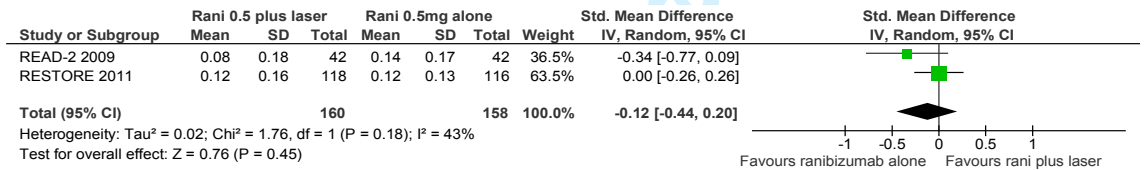

3.2 Proportion with >15 letter gain

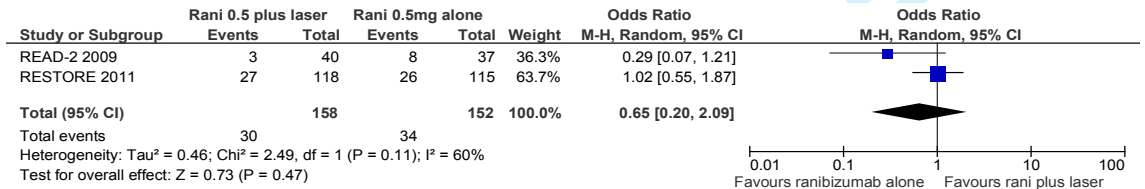

3.3 CMT

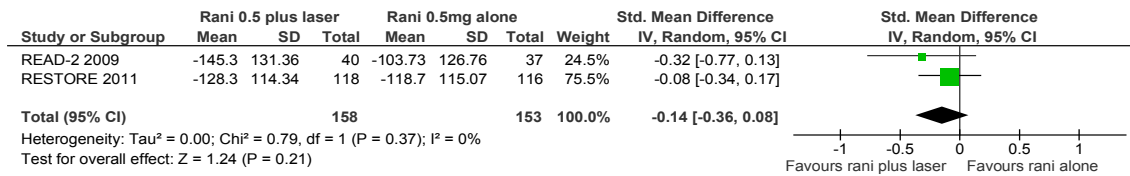

Figure 4 Ranibizumab 0.5mg plus laser versus laser alone

4.1 Mean change in BCVA

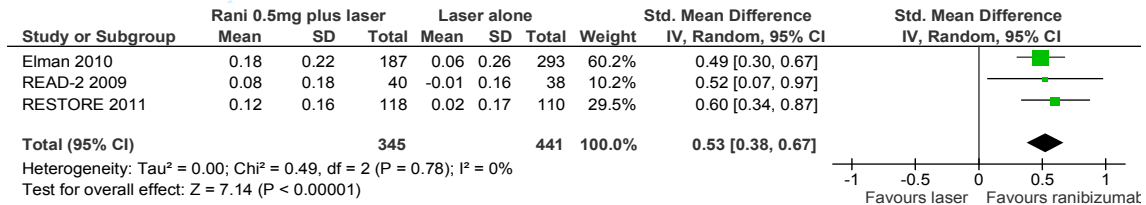

4.2 Proportion with >15 letter gain

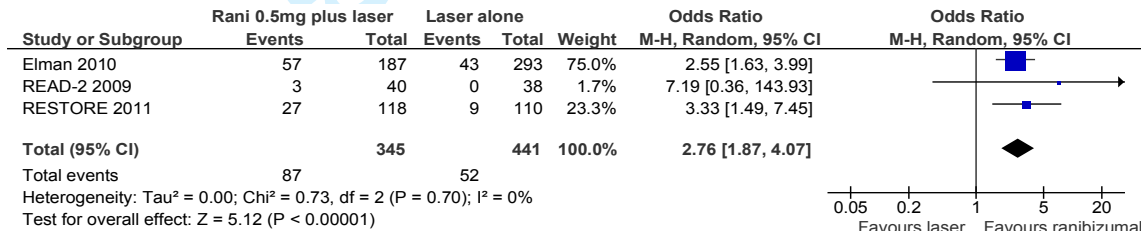

4.3 CMT

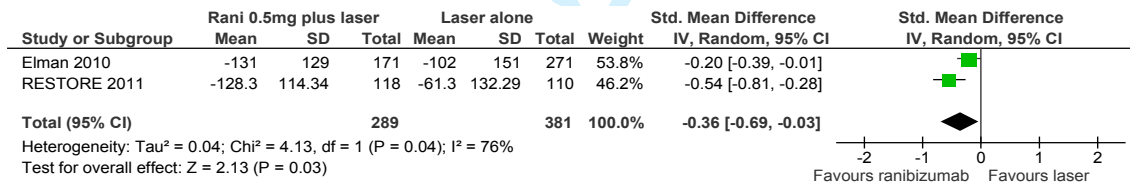

Figure 5 Pegaptanib 0.3mg versus sham injection

5.1 Proportion with >15 letter gain

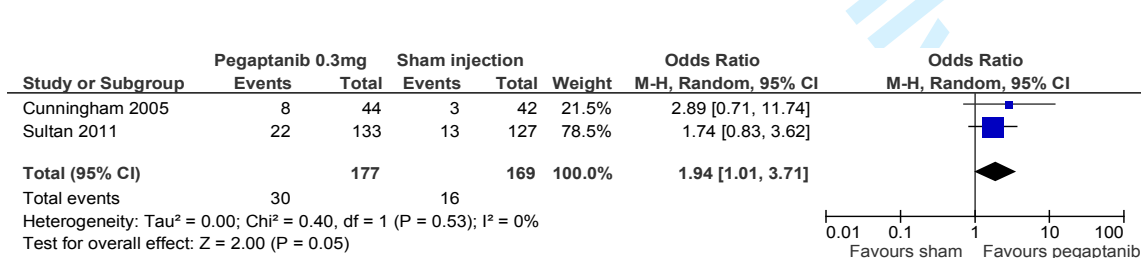

Figure 6 Triamcinolone 4mg versus laser alone

6.1 Mean change in BCVA

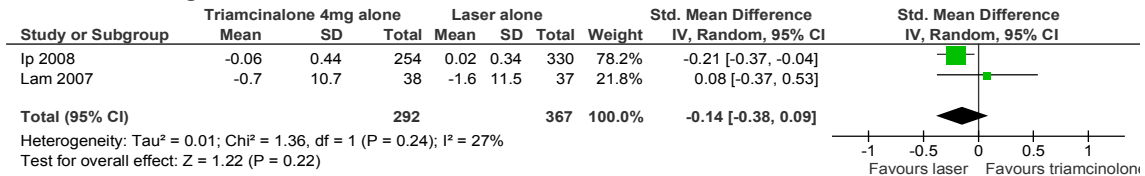

6.2 Proportion with >15 letter gain

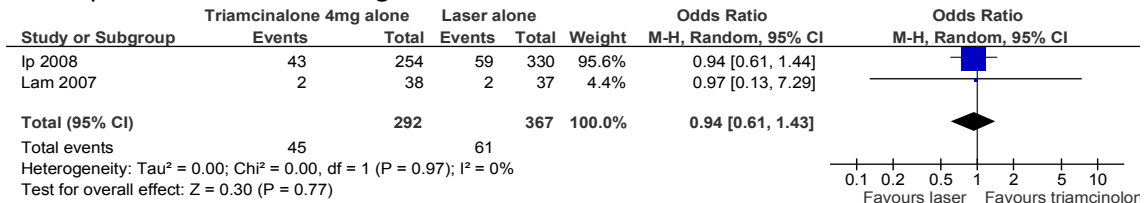

Figure 7 Triamcinolone 4mg plus laser versus laser alone

7.1 Mean change in BCVA

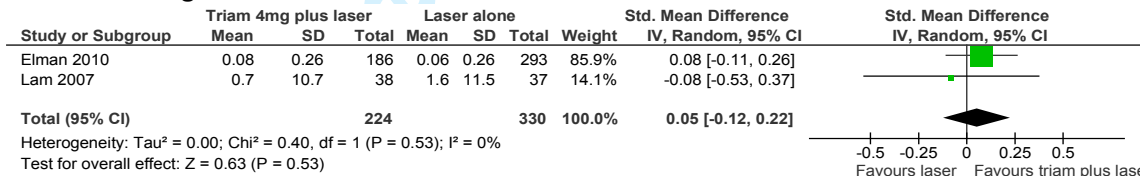

7.2 Proportion with >15 letter gain

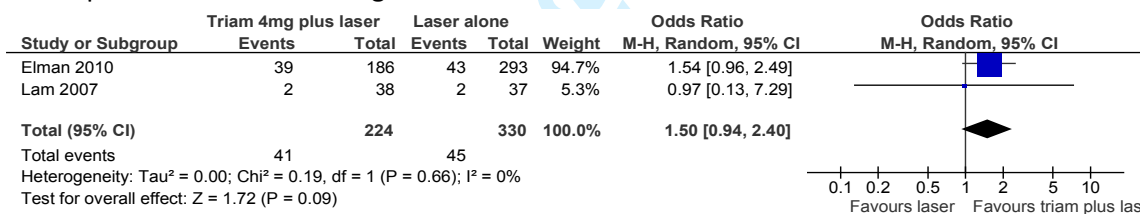

**Table 1: List of excluded studies**

| Study                           | Reason                          |
|---------------------------------|---------------------------------|
| <b>Active comparator trials</b> |                                 |
| Cho 2010[86]                    | Single dose                     |
| DRCRN 2010 (Googe 2010)[87]     | <6 mths f/u                     |
| Faghihi 2008[88]                | Single dose                     |
| Figueroa 2008[89]               | Single dose                     |
| Isaac 2012[90]                  | Single dose                     |
| Paccola 2008[91]                | Single dose                     |
| Prager 2011[92]                 | <25 pts per arm                 |
| Ozturk 2011[93]                 | Non-RCT                         |
| Marey 2011[94]                  | <6 mths                         |
| Shahin 2010[95]                 | Single dose                     |
| <b>Pegaptanib</b>               |                                 |
| Loftus 2011[96]                 | Quality of life data.           |
| <b>Ranibizumab</b>              |                                 |
| Ferrone 2011[97]                | <25 pts per arm                 |
| <b>Bevacizumab</b>              |                                 |
| Solaiman 2010[98]               | Single dose                     |
| DRCRN –Scott 2007[99]           | <25 pts per arm                 |
| Lee 2011[100]                   | Non-RCT                         |
| Isaac 2012[90]                  | Single dose                     |
| <b>Trimacinolone</b>            |                                 |
| Audren 2006a[101]               | Single dose (dosing study)      |
| Audren 2006b[102]               | Single dose                     |
| Avitabile 2005[103]             | Mixed RVO and DMO               |
| Bandello 2004[104]              | Case report + PDR               |
| Bonini 2005[105]                | Single dose injection technique |
| Cellini 2008[106]               | Single injection PSTI           |
| Cardillo 2005[107]              | Single injection PSTI           |
| Chung 2008[108]                 | Single injection PSTI           |
| Dehghan 2008[109]               | Single dose                     |
| DRCRN -Chew 2007[110]           | <25 pts per arm                 |
| Gil 2011[111]                   | <25 pts per arm                 |
| Entezari 2005[112]              | <6 months                       |
| Hauser 2008[113]                | Single dose                     |
| Jonas 2006[114]                 | Single dose                     |
| Joussen 2007[115]               | Study protocol                  |
| Avci 2006[116]                  | Anaesthetic technique           |
| Kang 2006[117]                  | Single dose                     |
| Kim 2008[118]                   | Single injection and CME        |
| Lam 2007b[119]                  | Single injection                |
| Lee 2009[120]                   | Single injection                |
| Maia 2009[121]                  | Single dose                     |
| Massin 2004[122]                | Single dose                     |
| Mohamed 2009[123]               | Post-hoc analysis               |
| Nakamura 2004[124]              | Single dose                     |
| Spandau 2005[125]               | Single dose                     |
| Tunc 2005[126]                  | <6 months                       |

|                          |                                  |
|--------------------------|----------------------------------|
| Verma 2004[127]          | Single dose                      |
| Wickremasinghe 2008[128] | Single dose                      |
| Yalcinbayir 2011[129]    | Single dose                      |
| <b>Dexamethasone</b>     |                                  |
| Haller 2010[130]         | <6 months                        |
| Haller 2009[131]         | <25pts per arm                   |
| Kuppermann 2007 [132]    | Mixture of macular oedema causes |
| Boyer 2011[133]          | Non-randomised                   |
| <b>Fluocinolone</b>      |                                  |
| Campochiaro 2010[134]    | <25pts per arm                   |
| <b>Diclofenac</b>        |                                  |
| Elbendary 2011 [71]      | <35pts per arm                   |

Table 2: Ranibizumab trials

| Study                                                                                                                                                                                                                                                                        | Participants and baseline values                                                                                                                                                                                                                                                                                                                                                                                                                                                                                                                                                                                                                                                                                                                                                                                                                                                    | Intervention                                                                                                                                                                                                                                                                                                                                                                                                                                                                                                                                                                                                                                                                                      | Outcome (change from baseline at study end)                                                                                                                                                                                                                                                                                                                                                                                                                                                                                                                                                                                                                                                                                                                                                                                                                                                                                                                                                                                                                                                                                                                  |  |                        |   |               |       |             |               |       |    |             |               |                |               |                       |    |               |                       |            |          |   |  |             |    |  |  |                       |   |            |        |                                                                                                 |          |       |  |             |        |  |
|------------------------------------------------------------------------------------------------------------------------------------------------------------------------------------------------------------------------------------------------------------------------------|-------------------------------------------------------------------------------------------------------------------------------------------------------------------------------------------------------------------------------------------------------------------------------------------------------------------------------------------------------------------------------------------------------------------------------------------------------------------------------------------------------------------------------------------------------------------------------------------------------------------------------------------------------------------------------------------------------------------------------------------------------------------------------------------------------------------------------------------------------------------------------------|---------------------------------------------------------------------------------------------------------------------------------------------------------------------------------------------------------------------------------------------------------------------------------------------------------------------------------------------------------------------------------------------------------------------------------------------------------------------------------------------------------------------------------------------------------------------------------------------------------------------------------------------------------------------------------------------------|--------------------------------------------------------------------------------------------------------------------------------------------------------------------------------------------------------------------------------------------------------------------------------------------------------------------------------------------------------------------------------------------------------------------------------------------------------------------------------------------------------------------------------------------------------------------------------------------------------------------------------------------------------------------------------------------------------------------------------------------------------------------------------------------------------------------------------------------------------------------------------------------------------------------------------------------------------------------------------------------------------------------------------------------------------------------------------------------------------------------------------------------------------------|--|------------------------|---|---------------|-------|-------------|---------------|-------|----|-------------|---------------|----------------|---------------|-----------------------|----|---------------|-----------------------|------------|----------|---|--|-------------|----|--|--|-----------------------|---|------------|--------|-------------------------------------------------------------------------------------------------|----------|-------|--|-------------|--------|--|
| <p><b>READ-2 Study (Nguyen 2009 / Nguyen 2010)</b>[28,47]<br/>USA<br/>Multicenter</p> <p><b>Design:</b> 3-arm RCT<br/><b>Follow-up:</b> 6 months, 2 year extension [no relevant outcomes as IVR received by all groups by that time, no safety outcomes for 2 year data]</p> | <p><b>N:</b> 126 eyes of 126 patients<br/><b>Inclusion criteria:</b> <math>\geq 18</math> years, type 1 or 2 DM, DMO, BCVA 20/40 to 20/320, CMT <math>\geq 250</math> <math>\mu\text{m}</math>, HbA1c <math>\geq 6\%</math> within 12 months before randomization; expectation that scatter laser photocoagulation not required for 6 months<br/><b>Exclusion criteria:</b> contributing causes to reduced BCVA other than DMO, focal/grid laser within 3 months, intraocular steroid within 3 months, intraocular VEGF antagonist within 2 months<br/><b>Age:</b> 62 years<br/><b>Sex:</b> 52 to 69% female<br/><b>Diabetes type:</b> not reported<br/><b>HbA1c:</b> 7.39 to 7.77%<br/><b>Baseline VA:</b> ETDRS letter score 24.85 to 28.35<br/><b>Baseline CMT:</b> excess foveal thickness 198.75 to 262.52 <math>\mu\text{m}</math><br/><b>Comorbidities:</b> not reported</p> | <p><b>Group 1 (IVR, n=42 eyes):</b> IV injections of 0.5 mg ranibizumab at baseline, 1, 3, and 5 months<br/><b>Group 2 (L, n=42 eyes):</b> focal/grid laser at baseline and 3 months if CMT <math>\geq 250</math> <math>\mu\text{m}</math><br/><b>Group 3 (IVRL, n=42 eyes):</b> IV injections of 0.5 mg ranibizumab at baseline and 3 months, followed by focal/grid laser treatment 1 week later<br/><b>Regimen for all groups:</b> after 6 months, patients could receive IV injections of ranibizumab no more than every 2 months or focal/grid laser no more than every 3 months if CMT <math>\geq 250</math> <math>\mu\text{m}</math><br/><b>Laser Modified ETDRS protocol</b> was used</p> | <p><b>At 6 months</b><br/><b>BCVA (ETDRS):</b></p> <table border="1"> <thead> <tr> <th></th> <th>BCVA (letters)</th> <th>p</th> </tr> </thead> <tbody> <tr> <td><b>IVR</b></td> <td>+7.24</td> <td>0.0003 vs L</td> </tr> <tr> <td><b>L</b></td> <td>-0.43</td> <td></td> </tr> <tr> <td><b>IVRL</b></td> <td>+3.80</td> <td>NS vs IVR or L</td> </tr> </tbody> </table> <p><b>plus <math>\geq 3</math> lines</b></p> <table border="1"> <thead> <tr> <th></th> <th></th> <th></th> </tr> </thead> <tbody> <tr> <td><b>IVR</b></td> <td>22%</td> <td>&lt;0.05 vs L</td> </tr> <tr> <td><b>L</b></td> <td>0</td> <td></td> </tr> <tr> <td><b>IVRL</b></td> <td>8%</td> <td></td> </tr> </tbody> </table> <p><b>CMT (OCT):</b></p> <table border="1"> <thead> <tr> <th></th> <th>CMT (<math>\mu\text{m}</math>)</th> <th>p</th> </tr> </thead> <tbody> <tr> <td><b>IVR</b></td> <td>-106.3</td> <td>all &lt;0.01 vs baseline, NS for elimination of <math>\geq 50\%</math> excess foveal thickness between groups</td> </tr> <tr> <td><b>L</b></td> <td>-82.8</td> <td></td> </tr> <tr> <td><b>IVRL</b></td> <td>-117.2</td> <td></td> </tr> </tbody> </table> |  | BCVA (letters)         | p | <b>IVR</b>    | +7.24 | 0.0003 vs L | <b>L</b>      | -0.43 |    | <b>IVRL</b> | +3.80         | NS vs IVR or L |               |                       |    | <b>IVR</b>    | 22%                   | <0.05 vs L | <b>L</b> | 0 |  | <b>IVRL</b> | 8% |  |  | CMT ( $\mu\text{m}$ ) | p | <b>IVR</b> | -106.3 | all <0.01 vs baseline, NS for elimination of $\geq 50\%$ excess foveal thickness between groups | <b>L</b> | -82.8 |  | <b>IVRL</b> | -117.2 |  |
|                                                                                                                                                                                                                                                                              | BCVA (letters)                                                                                                                                                                                                                                                                                                                                                                                                                                                                                                                                                                                                                                                                                                                                                                                                                                                                      | p                                                                                                                                                                                                                                                                                                                                                                                                                                                                                                                                                                                                                                                                                                 |                                                                                                                                                                                                                                                                                                                                                                                                                                                                                                                                                                                                                                                                                                                                                                                                                                                                                                                                                                                                                                                                                                                                                              |  |                        |   |               |       |             |               |       |    |             |               |                |               |                       |    |               |                       |            |          |   |  |             |    |  |  |                       |   |            |        |                                                                                                 |          |       |  |             |        |  |
| <b>IVR</b>                                                                                                                                                                                                                                                                   | +7.24                                                                                                                                                                                                                                                                                                                                                                                                                                                                                                                                                                                                                                                                                                                                                                                                                                                                               | 0.0003 vs L                                                                                                                                                                                                                                                                                                                                                                                                                                                                                                                                                                                                                                                                                       |                                                                                                                                                                                                                                                                                                                                                                                                                                                                                                                                                                                                                                                                                                                                                                                                                                                                                                                                                                                                                                                                                                                                                              |  |                        |   |               |       |             |               |       |    |             |               |                |               |                       |    |               |                       |            |          |   |  |             |    |  |  |                       |   |            |        |                                                                                                 |          |       |  |             |        |  |
| <b>L</b>                                                                                                                                                                                                                                                                     | -0.43                                                                                                                                                                                                                                                                                                                                                                                                                                                                                                                                                                                                                                                                                                                                                                                                                                                                               |                                                                                                                                                                                                                                                                                                                                                                                                                                                                                                                                                                                                                                                                                                   |                                                                                                                                                                                                                                                                                                                                                                                                                                                                                                                                                                                                                                                                                                                                                                                                                                                                                                                                                                                                                                                                                                                                                              |  |                        |   |               |       |             |               |       |    |             |               |                |               |                       |    |               |                       |            |          |   |  |             |    |  |  |                       |   |            |        |                                                                                                 |          |       |  |             |        |  |
| <b>IVRL</b>                                                                                                                                                                                                                                                                  | +3.80                                                                                                                                                                                                                                                                                                                                                                                                                                                                                                                                                                                                                                                                                                                                                                                                                                                                               | NS vs IVR or L                                                                                                                                                                                                                                                                                                                                                                                                                                                                                                                                                                                                                                                                                    |                                                                                                                                                                                                                                                                                                                                                                                                                                                                                                                                                                                                                                                                                                                                                                                                                                                                                                                                                                                                                                                                                                                                                              |  |                        |   |               |       |             |               |       |    |             |               |                |               |                       |    |               |                       |            |          |   |  |             |    |  |  |                       |   |            |        |                                                                                                 |          |       |  |             |        |  |
|                                                                                                                                                                                                                                                                              |                                                                                                                                                                                                                                                                                                                                                                                                                                                                                                                                                                                                                                                                                                                                                                                                                                                                                     |                                                                                                                                                                                                                                                                                                                                                                                                                                                                                                                                                                                                                                                                                                   |                                                                                                                                                                                                                                                                                                                                                                                                                                                                                                                                                                                                                                                                                                                                                                                                                                                                                                                                                                                                                                                                                                                                                              |  |                        |   |               |       |             |               |       |    |             |               |                |               |                       |    |               |                       |            |          |   |  |             |    |  |  |                       |   |            |        |                                                                                                 |          |       |  |             |        |  |
| <b>IVR</b>                                                                                                                                                                                                                                                                   | 22%                                                                                                                                                                                                                                                                                                                                                                                                                                                                                                                                                                                                                                                                                                                                                                                                                                                                                 | <0.05 vs L                                                                                                                                                                                                                                                                                                                                                                                                                                                                                                                                                                                                                                                                                        |                                                                                                                                                                                                                                                                                                                                                                                                                                                                                                                                                                                                                                                                                                                                                                                                                                                                                                                                                                                                                                                                                                                                                              |  |                        |   |               |       |             |               |       |    |             |               |                |               |                       |    |               |                       |            |          |   |  |             |    |  |  |                       |   |            |        |                                                                                                 |          |       |  |             |        |  |
| <b>L</b>                                                                                                                                                                                                                                                                     | 0                                                                                                                                                                                                                                                                                                                                                                                                                                                                                                                                                                                                                                                                                                                                                                                                                                                                                   |                                                                                                                                                                                                                                                                                                                                                                                                                                                                                                                                                                                                                                                                                                   |                                                                                                                                                                                                                                                                                                                                                                                                                                                                                                                                                                                                                                                                                                                                                                                                                                                                                                                                                                                                                                                                                                                                                              |  |                        |   |               |       |             |               |       |    |             |               |                |               |                       |    |               |                       |            |          |   |  |             |    |  |  |                       |   |            |        |                                                                                                 |          |       |  |             |        |  |
| <b>IVRL</b>                                                                                                                                                                                                                                                                  | 8%                                                                                                                                                                                                                                                                                                                                                                                                                                                                                                                                                                                                                                                                                                                                                                                                                                                                                  |                                                                                                                                                                                                                                                                                                                                                                                                                                                                                                                                                                                                                                                                                                   |                                                                                                                                                                                                                                                                                                                                                                                                                                                                                                                                                                                                                                                                                                                                                                                                                                                                                                                                                                                                                                                                                                                                                              |  |                        |   |               |       |             |               |       |    |             |               |                |               |                       |    |               |                       |            |          |   |  |             |    |  |  |                       |   |            |        |                                                                                                 |          |       |  |             |        |  |
|                                                                                                                                                                                                                                                                              | CMT ( $\mu\text{m}$ )                                                                                                                                                                                                                                                                                                                                                                                                                                                                                                                                                                                                                                                                                                                                                                                                                                                               | p                                                                                                                                                                                                                                                                                                                                                                                                                                                                                                                                                                                                                                                                                                 |                                                                                                                                                                                                                                                                                                                                                                                                                                                                                                                                                                                                                                                                                                                                                                                                                                                                                                                                                                                                                                                                                                                                                              |  |                        |   |               |       |             |               |       |    |             |               |                |               |                       |    |               |                       |            |          |   |  |             |    |  |  |                       |   |            |        |                                                                                                 |          |       |  |             |        |  |
| <b>IVR</b>                                                                                                                                                                                                                                                                   | -106.3                                                                                                                                                                                                                                                                                                                                                                                                                                                                                                                                                                                                                                                                                                                                                                                                                                                                              | all <0.01 vs baseline, NS for elimination of $\geq 50\%$ excess foveal thickness between groups                                                                                                                                                                                                                                                                                                                                                                                                                                                                                                                                                                                                   |                                                                                                                                                                                                                                                                                                                                                                                                                                                                                                                                                                                                                                                                                                                                                                                                                                                                                                                                                                                                                                                                                                                                                              |  |                        |   |               |       |             |               |       |    |             |               |                |               |                       |    |               |                       |            |          |   |  |             |    |  |  |                       |   |            |        |                                                                                                 |          |       |  |             |        |  |
| <b>L</b>                                                                                                                                                                                                                                                                     | -82.8                                                                                                                                                                                                                                                                                                                                                                                                                                                                                                                                                                                                                                                                                                                                                                                                                                                                               |                                                                                                                                                                                                                                                                                                                                                                                                                                                                                                                                                                                                                                                                                                   |                                                                                                                                                                                                                                                                                                                                                                                                                                                                                                                                                                                                                                                                                                                                                                                                                                                                                                                                                                                                                                                                                                                                                              |  |                        |   |               |       |             |               |       |    |             |               |                |               |                       |    |               |                       |            |          |   |  |             |    |  |  |                       |   |            |        |                                                                                                 |          |       |  |             |        |  |
| <b>IVRL</b>                                                                                                                                                                                                                                                                  | -117.2                                                                                                                                                                                                                                                                                                                                                                                                                                                                                                                                                                                                                                                                                                                                                                                                                                                                              |                                                                                                                                                                                                                                                                                                                                                                                                                                                                                                                                                                                                                                                                                                   |                                                                                                                                                                                                                                                                                                                                                                                                                                                                                                                                                                                                                                                                                                                                                                                                                                                                                                                                                                                                                                                                                                                                                              |  |                        |   |               |       |             |               |       |    |             |               |                |               |                       |    |               |                       |            |          |   |  |             |    |  |  |                       |   |            |        |                                                                                                 |          |       |  |             |        |  |
| <p><b>READ-3 Study (Do 2012)</b><br/>USA[50]</p> <p><b>Design:</b> phase 2, 2-arm RCT<br/><b>Follow-up:</b> 6 months</p>                                                                                                                                                     | <p><b>N:</b> 152 eyes<br/><b>Inclusion criteria:</b> NR<br/><b>Exclusion criteria:</b> NR<br/><b>Age:</b> NR<br/><b>Sex:</b> NR<br/><b>Diabetes type:</b> NR<br/><b>HbA1c:</b> NR<br/><b>Baseline VA:</b> Mean BCVA Snellen equivalent 20/63 in the 2.0 mg group and 20/80 in the 0.5 mg group<br/><b>Baseline CST (central subfield thickness):</b> 432 <math>\mu\text{m}</math> in the 2.0 mg group and 441 <math>\mu\text{m}</math> in the 0.5 mg group<br/><b>Comorbidities:</b> NR</p>                                                                                                                                                                                                                                                                                                                                                                                         | <p><b>Group 1 (IVR2.0, n=NR):</b> monthly injections<br/><b>Group 2 (IVR0.5, n=NR):</b> monthly injections</p> <p>After month 6, eyes evaluated and additional ranibizumab injections given on an as needed basis if DMO still present on OCT.</p>                                                                                                                                                                                                                                                                                                                                                                                                                                                | <p><b>At 6 months:</b><br/><b>BCVA</b></p> <table border="1"> <thead> <tr> <th></th> <th>Mean BCVA letters gain</th> <th>p</th> </tr> </thead> <tbody> <tr> <td><b>IVR2.0</b></td> <td>+7.46</td> <td>NR</td> </tr> <tr> <td><b>IVR0.5</b></td> <td>+8.69</td> <td>NR</td> </tr> </tbody> </table> <p><b>CST</b></p> <table border="1"> <thead> <tr> <th></th> <th>CST reduction</th> <th></th> </tr> </thead> <tbody> <tr> <td><b>IVR2.0</b></td> <td>-163.86 <math>\mu\text{m}</math></td> <td>NR</td> </tr> <tr> <td><b>IVR0.5</b></td> <td>-169.27 <math>\mu\text{m}</math></td> <td>NR</td> </tr> </tbody> </table>                                                                                                                                                                                                                                                                                                                                                                                                                                                                                                                                     |  | Mean BCVA letters gain | p | <b>IVR2.0</b> | +7.46 | NR          | <b>IVR0.5</b> | +8.69 | NR |             | CST reduction |                | <b>IVR2.0</b> | -163.86 $\mu\text{m}$ | NR | <b>IVR0.5</b> | -169.27 $\mu\text{m}$ | NR         |          |   |  |             |    |  |  |                       |   |            |        |                                                                                                 |          |       |  |             |        |  |
|                                                                                                                                                                                                                                                                              | Mean BCVA letters gain                                                                                                                                                                                                                                                                                                                                                                                                                                                                                                                                                                                                                                                                                                                                                                                                                                                              | p                                                                                                                                                                                                                                                                                                                                                                                                                                                                                                                                                                                                                                                                                                 |                                                                                                                                                                                                                                                                                                                                                                                                                                                                                                                                                                                                                                                                                                                                                                                                                                                                                                                                                                                                                                                                                                                                                              |  |                        |   |               |       |             |               |       |    |             |               |                |               |                       |    |               |                       |            |          |   |  |             |    |  |  |                       |   |            |        |                                                                                                 |          |       |  |             |        |  |
| <b>IVR2.0</b>                                                                                                                                                                                                                                                                | +7.46                                                                                                                                                                                                                                                                                                                                                                                                                                                                                                                                                                                                                                                                                                                                                                                                                                                                               | NR                                                                                                                                                                                                                                                                                                                                                                                                                                                                                                                                                                                                                                                                                                |                                                                                                                                                                                                                                                                                                                                                                                                                                                                                                                                                                                                                                                                                                                                                                                                                                                                                                                                                                                                                                                                                                                                                              |  |                        |   |               |       |             |               |       |    |             |               |                |               |                       |    |               |                       |            |          |   |  |             |    |  |  |                       |   |            |        |                                                                                                 |          |       |  |             |        |  |
| <b>IVR0.5</b>                                                                                                                                                                                                                                                                | +8.69                                                                                                                                                                                                                                                                                                                                                                                                                                                                                                                                                                                                                                                                                                                                                                                                                                                                               | NR                                                                                                                                                                                                                                                                                                                                                                                                                                                                                                                                                                                                                                                                                                |                                                                                                                                                                                                                                                                                                                                                                                                                                                                                                                                                                                                                                                                                                                                                                                                                                                                                                                                                                                                                                                                                                                                                              |  |                        |   |               |       |             |               |       |    |             |               |                |               |                       |    |               |                       |            |          |   |  |             |    |  |  |                       |   |            |        |                                                                                                 |          |       |  |             |        |  |
|                                                                                                                                                                                                                                                                              | CST reduction                                                                                                                                                                                                                                                                                                                                                                                                                                                                                                                                                                                                                                                                                                                                                                                                                                                                       |                                                                                                                                                                                                                                                                                                                                                                                                                                                                                                                                                                                                                                                                                                   |                                                                                                                                                                                                                                                                                                                                                                                                                                                                                                                                                                                                                                                                                                                                                                                                                                                                                                                                                                                                                                                                                                                                                              |  |                        |   |               |       |             |               |       |    |             |               |                |               |                       |    |               |                       |            |          |   |  |             |    |  |  |                       |   |            |        |                                                                                                 |          |       |  |             |        |  |
| <b>IVR2.0</b>                                                                                                                                                                                                                                                                | -163.86 $\mu\text{m}$                                                                                                                                                                                                                                                                                                                                                                                                                                                                                                                                                                                                                                                                                                                                                                                                                                                               | NR                                                                                                                                                                                                                                                                                                                                                                                                                                                                                                                                                                                                                                                                                                |                                                                                                                                                                                                                                                                                                                                                                                                                                                                                                                                                                                                                                                                                                                                                                                                                                                                                                                                                                                                                                                                                                                                                              |  |                        |   |               |       |             |               |       |    |             |               |                |               |                       |    |               |                       |            |          |   |  |             |    |  |  |                       |   |            |        |                                                                                                 |          |       |  |             |        |  |
| <b>IVR0.5</b>                                                                                                                                                                                                                                                                | -169.27 $\mu\text{m}$                                                                                                                                                                                                                                                                                                                                                                                                                                                                                                                                                                                                                                                                                                                                                                                                                                                               | NR                                                                                                                                                                                                                                                                                                                                                                                                                                                                                                                                                                                                                                                                                                |                                                                                                                                                                                                                                                                                                                                                                                                                                                                                                                                                                                                                                                                                                                                                                                                                                                                                                                                                                                                                                                                                                                                                              |  |                        |   |               |       |             |               |       |    |             |               |                |               |                       |    |               |                       |            |          |   |  |             |    |  |  |                       |   |            |        |                                                                                                 |          |       |  |             |        |  |

| Study                                                                                                                                                           | Participants and baseline values                                                                                                                                                                                                                                                                                                                                                                                                                                                                                                                                                                                                                                                                                                                                                                                                                                                                                                                                                                                         | Intervention                                                                                                                                                                                                                                                                                                                                                                                                                                                                                                                                                                                                                                                                                                                                                                                                                                                       | Outcome (change from baseline at study end)                                                                                                                                                                                                                                                                                                                                                                                                                                                                                                                                                                                                                                                                                                                                                                                                                                                                                                                                                                                                                                                                       |  |                |   |               |             |              |               |             |              |          |             |  |               |                                   |              |               |                                   |              |          |                                    |  |  |          |   |               |                |              |               |                |              |          |               |  |
|-----------------------------------------------------------------------------------------------------------------------------------------------------------------|--------------------------------------------------------------------------------------------------------------------------------------------------------------------------------------------------------------------------------------------------------------------------------------------------------------------------------------------------------------------------------------------------------------------------------------------------------------------------------------------------------------------------------------------------------------------------------------------------------------------------------------------------------------------------------------------------------------------------------------------------------------------------------------------------------------------------------------------------------------------------------------------------------------------------------------------------------------------------------------------------------------------------|--------------------------------------------------------------------------------------------------------------------------------------------------------------------------------------------------------------------------------------------------------------------------------------------------------------------------------------------------------------------------------------------------------------------------------------------------------------------------------------------------------------------------------------------------------------------------------------------------------------------------------------------------------------------------------------------------------------------------------------------------------------------------------------------------------------------------------------------------------------------|-------------------------------------------------------------------------------------------------------------------------------------------------------------------------------------------------------------------------------------------------------------------------------------------------------------------------------------------------------------------------------------------------------------------------------------------------------------------------------------------------------------------------------------------------------------------------------------------------------------------------------------------------------------------------------------------------------------------------------------------------------------------------------------------------------------------------------------------------------------------------------------------------------------------------------------------------------------------------------------------------------------------------------------------------------------------------------------------------------------------|--|----------------|---|---------------|-------------|--------------|---------------|-------------|--------------|----------|-------------|--|---------------|-----------------------------------|--------------|---------------|-----------------------------------|--------------|----------|------------------------------------|--|--|----------|---|---------------|----------------|--------------|---------------|----------------|--------------|----------|---------------|--|
| <p><b>RESOLVE Study (Massin 2010)</b>[36]<br/>Multicenter international</p> <p><b>Design:</b> 3-arm placebo-controlled RCT<br/><b>Follow-up:</b> 12 months</p>  | <p><b>N:</b> 151 eyes of 151 patients<br/><b>Inclusion criteria:</b> &gt;18 years, type 1 or 2 DM, clinically significant DMO, BCVA 20/40 to 20/160, HbA1c &lt;12%, decreased vision attributed to foveal thickening from DMO, laser photocoagulation could be safely withheld in the study eye for at least 3 months after randomization<br/><b>Exclusion criteria:</b> unstable medical status, panretinal laser photocoagulation performed within 6 months before study entry, previous grid/laser photocoagulation except patients with only mild laser burns at least 1000 µm from the centre of the fovea performed &gt;6 months previously<br/><b>Age:</b> 63 to 65 (range 32 to 85) years<br/><b>Sex:</b> 43.1 to 49.0% female<br/><b>Diabetes type:</b> 96.1 to 98.0% type 2 DM<br/><b>HbA1c:</b> 7.3 to 7.6 (range 5.3 to 11.1) %<br/><b>Baseline VA:</b> ETDRS letter score 59.2 to 61.2 SD9.0 to 10.2<br/><b>Baseline CMT:</b> 448.9 to 459.5 SD102.8 to 120.1 µm<br/><b>Comorbidities:</b> not reported</p> | <p><b>Group 1 (IVR0.3, n=51 eyes):</b> 0.3 mg (0.05 ml) IV ranibizumab, 3 monthly injections (dose up to 0.6 mg, see below)<br/><b>Group 2 (IVR0.5, n=51 eyes):</b> 0.5 mg IV (0.05 ml) ranibizumab, 3 monthly injections (dose up to 1.0 mg, see below)<br/><b>Group 3 (C, n=49 eyes):</b> sham treatment, 3 monthly injections<br/><b>Regimen for all groups:</b> after month 1, the injection dose could be doubled if CMT remained &gt;300 µm or was &gt;225 µm and reduction in retinal oedema from previous assessment was &lt;50 µm; once injection volume was 0.1 ml it remained that for subsequent injections; if treatment had been withheld for &gt;45 days, subsequent injections restarted at 0.05 ml; 68.6% of dose doubling with ranibizumab, 91.8% with sham; 34.7% of rescue laser photocoagulation in sham group, 4.9% in ranibizumab group</p> | <p><b>At 12 months BCVA (ETDRS):</b></p> <table border="1"> <thead> <tr> <th></th> <th>BCVA (letters)</th> <th>p</th> </tr> </thead> <tbody> <tr> <td><i>IVR0.3</i></td> <td>+11.8 SD6.6</td> <td>&lt;0.0001 vs C</td> </tr> <tr> <td><i>IVR0.5</i></td> <td>+8.8 SD11.0</td> <td>&lt;0.0001 vs C</td> </tr> <tr> <td><i>C</i></td> <td>-1.4 SD14.2</td> <td></td> </tr> </tbody> </table> <p><b>change ≥10 letters</b></p> <table border="1"> <tbody> <tr> <td><i>IVR0.3</i></td> <td>gain 72.5%<br/>loss 0</td> <td>&lt;0.0001 vs C</td> </tr> <tr> <td><i>IVR0.5</i></td> <td>gain 49.0%<br/>loss 9.8%</td> <td>0.001 vs C</td> </tr> <tr> <td><i>C</i></td> <td>gain 18.4%<br/>loss 24.5%</td> <td></td> </tr> </tbody> </table> <p><b>CMT (OCT):</b></p> <table border="1"> <thead> <tr> <th></th> <th>CMT (µm)</th> <th>p</th> </tr> </thead> <tbody> <tr> <td><i>IVR0.3</i></td> <td>-200.7 SD122.2</td> <td>&lt;0.0001 vs C</td> </tr> <tr> <td><i>IVR0.5</i></td> <td>-187.6 SD147.8</td> <td>&lt;0.0001 vs C</td> </tr> <tr> <td><i>C</i></td> <td>-48.4 SD153.4</td> <td></td> </tr> </tbody> </table> |  | BCVA (letters) | p | <i>IVR0.3</i> | +11.8 SD6.6 | <0.0001 vs C | <i>IVR0.5</i> | +8.8 SD11.0 | <0.0001 vs C | <i>C</i> | -1.4 SD14.2 |  | <i>IVR0.3</i> | gain 72.5%<br>loss 0              | <0.0001 vs C | <i>IVR0.5</i> | gain 49.0%<br>loss 9.8%           | 0.001 vs C   | <i>C</i> | gain 18.4%<br>loss 24.5%           |  |  | CMT (µm) | p | <i>IVR0.3</i> | -200.7 SD122.2 | <0.0001 vs C | <i>IVR0.5</i> | -187.6 SD147.8 | <0.0001 vs C | <i>C</i> | -48.4 SD153.4 |  |
|                                                                                                                                                                 | BCVA (letters)                                                                                                                                                                                                                                                                                                                                                                                                                                                                                                                                                                                                                                                                                                                                                                                                                                                                                                                                                                                                           | p                                                                                                                                                                                                                                                                                                                                                                                                                                                                                                                                                                                                                                                                                                                                                                                                                                                                  |                                                                                                                                                                                                                                                                                                                                                                                                                                                                                                                                                                                                                                                                                                                                                                                                                                                                                                                                                                                                                                                                                                                   |  |                |   |               |             |              |               |             |              |          |             |  |               |                                   |              |               |                                   |              |          |                                    |  |  |          |   |               |                |              |               |                |              |          |               |  |
| <i>IVR0.3</i>                                                                                                                                                   | +11.8 SD6.6                                                                                                                                                                                                                                                                                                                                                                                                                                                                                                                                                                                                                                                                                                                                                                                                                                                                                                                                                                                                              | <0.0001 vs C                                                                                                                                                                                                                                                                                                                                                                                                                                                                                                                                                                                                                                                                                                                                                                                                                                                       |                                                                                                                                                                                                                                                                                                                                                                                                                                                                                                                                                                                                                                                                                                                                                                                                                                                                                                                                                                                                                                                                                                                   |  |                |   |               |             |              |               |             |              |          |             |  |               |                                   |              |               |                                   |              |          |                                    |  |  |          |   |               |                |              |               |                |              |          |               |  |
| <i>IVR0.5</i>                                                                                                                                                   | +8.8 SD11.0                                                                                                                                                                                                                                                                                                                                                                                                                                                                                                                                                                                                                                                                                                                                                                                                                                                                                                                                                                                                              | <0.0001 vs C                                                                                                                                                                                                                                                                                                                                                                                                                                                                                                                                                                                                                                                                                                                                                                                                                                                       |                                                                                                                                                                                                                                                                                                                                                                                                                                                                                                                                                                                                                                                                                                                                                                                                                                                                                                                                                                                                                                                                                                                   |  |                |   |               |             |              |               |             |              |          |             |  |               |                                   |              |               |                                   |              |          |                                    |  |  |          |   |               |                |              |               |                |              |          |               |  |
| <i>C</i>                                                                                                                                                        | -1.4 SD14.2                                                                                                                                                                                                                                                                                                                                                                                                                                                                                                                                                                                                                                                                                                                                                                                                                                                                                                                                                                                                              |                                                                                                                                                                                                                                                                                                                                                                                                                                                                                                                                                                                                                                                                                                                                                                                                                                                                    |                                                                                                                                                                                                                                                                                                                                                                                                                                                                                                                                                                                                                                                                                                                                                                                                                                                                                                                                                                                                                                                                                                                   |  |                |   |               |             |              |               |             |              |          |             |  |               |                                   |              |               |                                   |              |          |                                    |  |  |          |   |               |                |              |               |                |              |          |               |  |
| <i>IVR0.3</i>                                                                                                                                                   | gain 72.5%<br>loss 0                                                                                                                                                                                                                                                                                                                                                                                                                                                                                                                                                                                                                                                                                                                                                                                                                                                                                                                                                                                                     | <0.0001 vs C                                                                                                                                                                                                                                                                                                                                                                                                                                                                                                                                                                                                                                                                                                                                                                                                                                                       |                                                                                                                                                                                                                                                                                                                                                                                                                                                                                                                                                                                                                                                                                                                                                                                                                                                                                                                                                                                                                                                                                                                   |  |                |   |               |             |              |               |             |              |          |             |  |               |                                   |              |               |                                   |              |          |                                    |  |  |          |   |               |                |              |               |                |              |          |               |  |
| <i>IVR0.5</i>                                                                                                                                                   | gain 49.0%<br>loss 9.8%                                                                                                                                                                                                                                                                                                                                                                                                                                                                                                                                                                                                                                                                                                                                                                                                                                                                                                                                                                                                  | 0.001 vs C                                                                                                                                                                                                                                                                                                                                                                                                                                                                                                                                                                                                                                                                                                                                                                                                                                                         |                                                                                                                                                                                                                                                                                                                                                                                                                                                                                                                                                                                                                                                                                                                                                                                                                                                                                                                                                                                                                                                                                                                   |  |                |   |               |             |              |               |             |              |          |             |  |               |                                   |              |               |                                   |              |          |                                    |  |  |          |   |               |                |              |               |                |              |          |               |  |
| <i>C</i>                                                                                                                                                        | gain 18.4%<br>loss 24.5%                                                                                                                                                                                                                                                                                                                                                                                                                                                                                                                                                                                                                                                                                                                                                                                                                                                                                                                                                                                                 |                                                                                                                                                                                                                                                                                                                                                                                                                                                                                                                                                                                                                                                                                                                                                                                                                                                                    |                                                                                                                                                                                                                                                                                                                                                                                                                                                                                                                                                                                                                                                                                                                                                                                                                                                                                                                                                                                                                                                                                                                   |  |                |   |               |             |              |               |             |              |          |             |  |               |                                   |              |               |                                   |              |          |                                    |  |  |          |   |               |                |              |               |                |              |          |               |  |
|                                                                                                                                                                 | CMT (µm)                                                                                                                                                                                                                                                                                                                                                                                                                                                                                                                                                                                                                                                                                                                                                                                                                                                                                                                                                                                                                 | p                                                                                                                                                                                                                                                                                                                                                                                                                                                                                                                                                                                                                                                                                                                                                                                                                                                                  |                                                                                                                                                                                                                                                                                                                                                                                                                                                                                                                                                                                                                                                                                                                                                                                                                                                                                                                                                                                                                                                                                                                   |  |                |   |               |             |              |               |             |              |          |             |  |               |                                   |              |               |                                   |              |          |                                    |  |  |          |   |               |                |              |               |                |              |          |               |  |
| <i>IVR0.3</i>                                                                                                                                                   | -200.7 SD122.2                                                                                                                                                                                                                                                                                                                                                                                                                                                                                                                                                                                                                                                                                                                                                                                                                                                                                                                                                                                                           | <0.0001 vs C                                                                                                                                                                                                                                                                                                                                                                                                                                                                                                                                                                                                                                                                                                                                                                                                                                                       |                                                                                                                                                                                                                                                                                                                                                                                                                                                                                                                                                                                                                                                                                                                                                                                                                                                                                                                                                                                                                                                                                                                   |  |                |   |               |             |              |               |             |              |          |             |  |               |                                   |              |               |                                   |              |          |                                    |  |  |          |   |               |                |              |               |                |              |          |               |  |
| <i>IVR0.5</i>                                                                                                                                                   | -187.6 SD147.8                                                                                                                                                                                                                                                                                                                                                                                                                                                                                                                                                                                                                                                                                                                                                                                                                                                                                                                                                                                                           | <0.0001 vs C                                                                                                                                                                                                                                                                                                                                                                                                                                                                                                                                                                                                                                                                                                                                                                                                                                                       |                                                                                                                                                                                                                                                                                                                                                                                                                                                                                                                                                                                                                                                                                                                                                                                                                                                                                                                                                                                                                                                                                                                   |  |                |   |               |             |              |               |             |              |          |             |  |               |                                   |              |               |                                   |              |          |                                    |  |  |          |   |               |                |              |               |                |              |          |               |  |
| <i>C</i>                                                                                                                                                        | -48.4 SD153.4                                                                                                                                                                                                                                                                                                                                                                                                                                                                                                                                                                                                                                                                                                                                                                                                                                                                                                                                                                                                            |                                                                                                                                                                                                                                                                                                                                                                                                                                                                                                                                                                                                                                                                                                                                                                                                                                                                    |                                                                                                                                                                                                                                                                                                                                                                                                                                                                                                                                                                                                                                                                                                                                                                                                                                                                                                                                                                                                                                                                                                                   |  |                |   |               |             |              |               |             |              |          |             |  |               |                                   |              |               |                                   |              |          |                                    |  |  |          |   |               |                |              |               |                |              |          |               |  |
| <p><b>RESTORE Study (Mitchell 2011/ Mitchell 2012)</b>[24,49]<br/>Multicenter international</p> <p><b>Design:</b> 3-arm RCT<br/><b>Follow-up:</b> 12 months</p> | <p><b>N:</b> 345 eyes of 345 patients<br/><b>Inclusion criteria:</b> ≥18 years, type 1 or 2 DM, HbA1c ≤10%, visual impairment due to DMO (eligible for laser treatment), stable medication for management of diabetes, BCVA ETDRS letter score 39 to 78<br/><b>Exclusion criteria:</b> concomitant eye conditions that could affect VA, active intraocular inflammation or infection, uncontrolled glaucoma in either eye, panretinal laser photocoagulation within 6 months or focal/grid laser photocoagulation within 3 months prior to study entry, history of stroke, hypertension.<br/><b>Age:</b> 62.9 to 64.0 SD8.15 to 9.29 years<br/><b>Sex:</b> 37.1 to 47.7% female<br/><b>Diabetes type:</b> 86.4 to 88.8% type 2 DM<br/><b>HbA1c:</b> not reported</p>                                                                                                                                                                                                                                                     | <p><b>Group 1 (IVR, n=116 eyes):</b> 0.5 mg IV ranibizumab plus sham laser (median injections 7 (range 1 to 12), median sham laser treatments 2 (range 1 to 5))<br/><b>Group 2 (IVRL, n=118 eyes):</b> 0.5 mg IV ranibizumab plus active laser (median injections 7 (range 2 to 12), median laser treatments 1 (range 1 to 5))<br/><b>Group 3 (L, n=111 eyes):</b> laser treatment plus sham injections (median sham injections 7 (range 1 to 12), median laser treatments 2 (range 1 to 4))<br/><b>Regimen for all groups:</b> 3 initial monthly injections, followed by retreatment schedule; 1 injection per month if stable VA not reached;</p>                                                                                                                                                                                                                | <p><b>At 12 months BCVA (ETDRS):</b></p> <table border="1"> <thead> <tr> <th></th> <th>BCVA (letters)</th> <th>p</th> </tr> </thead> <tbody> <tr> <td><i>IVR</i></td> <td>+6.1 SD6.43</td> <td>&lt;0.0001 vs L</td> </tr> <tr> <td><i>IVRL</i></td> <td>+5.9 SD7.92</td> <td>&lt;0.0001 vs L</td> </tr> <tr> <td><i>L</i></td> <td>+0.8 SD8.56</td> <td></td> </tr> </tbody> </table> <p><b>BCVA change categories</b></p> <table border="1"> <tbody> <tr> <td><i>IVR</i></td> <td>plus ≥10: 37.4%<br/>loss ≥10: 3.5%</td> <td>&lt;0.0001 vs L</td> </tr> <tr> <td><i>IVRL</i></td> <td>plus ≥10: 43.2%<br/>loss ≥10: 4.2%</td> <td>&lt;0.0001 vs L</td> </tr> <tr> <td><i>L</i></td> <td>plus ≥10: 15.5%<br/>loss ≥10: 12.7%</td> <td></td> </tr> </tbody> </table> <p><b>CMT (OCT):</b></p>                                                                                                                                                                                                                                                                                                                     |  | BCVA (letters) | p | <i>IVR</i>    | +6.1 SD6.43 | <0.0001 vs L | <i>IVRL</i>   | +5.9 SD7.92 | <0.0001 vs L | <i>L</i> | +0.8 SD8.56 |  | <i>IVR</i>    | plus ≥10: 37.4%<br>loss ≥10: 3.5% | <0.0001 vs L | <i>IVRL</i>   | plus ≥10: 43.2%<br>loss ≥10: 4.2% | <0.0001 vs L | <i>L</i> | plus ≥10: 15.5%<br>loss ≥10: 12.7% |  |  |          |   |               |                |              |               |                |              |          |               |  |
|                                                                                                                                                                 | BCVA (letters)                                                                                                                                                                                                                                                                                                                                                                                                                                                                                                                                                                                                                                                                                                                                                                                                                                                                                                                                                                                                           | p                                                                                                                                                                                                                                                                                                                                                                                                                                                                                                                                                                                                                                                                                                                                                                                                                                                                  |                                                                                                                                                                                                                                                                                                                                                                                                                                                                                                                                                                                                                                                                                                                                                                                                                                                                                                                                                                                                                                                                                                                   |  |                |   |               |             |              |               |             |              |          |             |  |               |                                   |              |               |                                   |              |          |                                    |  |  |          |   |               |                |              |               |                |              |          |               |  |
| <i>IVR</i>                                                                                                                                                      | +6.1 SD6.43                                                                                                                                                                                                                                                                                                                                                                                                                                                                                                                                                                                                                                                                                                                                                                                                                                                                                                                                                                                                              | <0.0001 vs L                                                                                                                                                                                                                                                                                                                                                                                                                                                                                                                                                                                                                                                                                                                                                                                                                                                       |                                                                                                                                                                                                                                                                                                                                                                                                                                                                                                                                                                                                                                                                                                                                                                                                                                                                                                                                                                                                                                                                                                                   |  |                |   |               |             |              |               |             |              |          |             |  |               |                                   |              |               |                                   |              |          |                                    |  |  |          |   |               |                |              |               |                |              |          |               |  |
| <i>IVRL</i>                                                                                                                                                     | +5.9 SD7.92                                                                                                                                                                                                                                                                                                                                                                                                                                                                                                                                                                                                                                                                                                                                                                                                                                                                                                                                                                                                              | <0.0001 vs L                                                                                                                                                                                                                                                                                                                                                                                                                                                                                                                                                                                                                                                                                                                                                                                                                                                       |                                                                                                                                                                                                                                                                                                                                                                                                                                                                                                                                                                                                                                                                                                                                                                                                                                                                                                                                                                                                                                                                                                                   |  |                |   |               |             |              |               |             |              |          |             |  |               |                                   |              |               |                                   |              |          |                                    |  |  |          |   |               |                |              |               |                |              |          |               |  |
| <i>L</i>                                                                                                                                                        | +0.8 SD8.56                                                                                                                                                                                                                                                                                                                                                                                                                                                                                                                                                                                                                                                                                                                                                                                                                                                                                                                                                                                                              |                                                                                                                                                                                                                                                                                                                                                                                                                                                                                                                                                                                                                                                                                                                                                                                                                                                                    |                                                                                                                                                                                                                                                                                                                                                                                                                                                                                                                                                                                                                                                                                                                                                                                                                                                                                                                                                                                                                                                                                                                   |  |                |   |               |             |              |               |             |              |          |             |  |               |                                   |              |               |                                   |              |          |                                    |  |  |          |   |               |                |              |               |                |              |          |               |  |
| <i>IVR</i>                                                                                                                                                      | plus ≥10: 37.4%<br>loss ≥10: 3.5%                                                                                                                                                                                                                                                                                                                                                                                                                                                                                                                                                                                                                                                                                                                                                                                                                                                                                                                                                                                        | <0.0001 vs L                                                                                                                                                                                                                                                                                                                                                                                                                                                                                                                                                                                                                                                                                                                                                                                                                                                       |                                                                                                                                                                                                                                                                                                                                                                                                                                                                                                                                                                                                                                                                                                                                                                                                                                                                                                                                                                                                                                                                                                                   |  |                |   |               |             |              |               |             |              |          |             |  |               |                                   |              |               |                                   |              |          |                                    |  |  |          |   |               |                |              |               |                |              |          |               |  |
| <i>IVRL</i>                                                                                                                                                     | plus ≥10: 43.2%<br>loss ≥10: 4.2%                                                                                                                                                                                                                                                                                                                                                                                                                                                                                                                                                                                                                                                                                                                                                                                                                                                                                                                                                                                        | <0.0001 vs L                                                                                                                                                                                                                                                                                                                                                                                                                                                                                                                                                                                                                                                                                                                                                                                                                                                       |                                                                                                                                                                                                                                                                                                                                                                                                                                                                                                                                                                                                                                                                                                                                                                                                                                                                                                                                                                                                                                                                                                                   |  |                |   |               |             |              |               |             |              |          |             |  |               |                                   |              |               |                                   |              |          |                                    |  |  |          |   |               |                |              |               |                |              |          |               |  |
| <i>L</i>                                                                                                                                                        | plus ≥10: 15.5%<br>loss ≥10: 12.7%                                                                                                                                                                                                                                                                                                                                                                                                                                                                                                                                                                                                                                                                                                                                                                                                                                                                                                                                                                                       |                                                                                                                                                                                                                                                                                                                                                                                                                                                                                                                                                                                                                                                                                                                                                                                                                                                                    |                                                                                                                                                                                                                                                                                                                                                                                                                                                                                                                                                                                                                                                                                                                                                                                                                                                                                                                                                                                                                                                                                                                   |  |                |   |               |             |              |               |             |              |          |             |  |               |                                   |              |               |                                   |              |          |                                    |  |  |          |   |               |                |              |               |                |              |          |               |  |



| Study                                                                                                                                                                   | Participants and baseline values                                                                                                                                                                                                                                                                                                                                                                                                                                                                                                                                                                                                           | Intervention                                                                                                                                                                                                                                                                                                                                                                                                                                              | Outcome (change from baseline at study end)                                                                                                                                                                                                                                                                                                                                                                                                                                                                                                                                                                                                                                                                                                                                                                                                                                                                                    |  |                                                    |   |                         |                 |                  |                    |                 |                  |                     |                |  |  |                                                       |  |                         |                            |              |                    |                            |              |                     |                           |  |
|-------------------------------------------------------------------------------------------------------------------------------------------------------------------------|--------------------------------------------------------------------------------------------------------------------------------------------------------------------------------------------------------------------------------------------------------------------------------------------------------------------------------------------------------------------------------------------------------------------------------------------------------------------------------------------------------------------------------------------------------------------------------------------------------------------------------------------|-----------------------------------------------------------------------------------------------------------------------------------------------------------------------------------------------------------------------------------------------------------------------------------------------------------------------------------------------------------------------------------------------------------------------------------------------------------|--------------------------------------------------------------------------------------------------------------------------------------------------------------------------------------------------------------------------------------------------------------------------------------------------------------------------------------------------------------------------------------------------------------------------------------------------------------------------------------------------------------------------------------------------------------------------------------------------------------------------------------------------------------------------------------------------------------------------------------------------------------------------------------------------------------------------------------------------------------------------------------------------------------------------------|--|----------------------------------------------------|---|-------------------------|-----------------|------------------|--------------------|-----------------|------------------|---------------------|----------------|--|--|-------------------------------------------------------|--|-------------------------|----------------------------|--------------|--------------------|----------------------------|--------------|---------------------|---------------------------|--|
|                                                                                                                                                                         | <b>Baseline VA:</b> ETDRS letter score 62.4 to 64.8 SD9.99 to 11.11<br><b>Baseline CMT:</b> 412.4 to 426.6 SD118.01 to 123.95<br><b>Comorbidities:</b> not reported                                                                                                                                                                                                                                                                                                                                                                                                                                                                        | <b>Laser</b> retreatments in accordance with ETDRS guidelines at intervals no shorter than 3 months from previous treatment                                                                                                                                                                                                                                                                                                                               | <table border="1"> <thead> <tr> <th></th> <th>CMT (<math>\mu\text{m}</math>)</th> <th>p</th> </tr> </thead> <tbody> <tr> <td><i>IVR</i></td> <td>-118.7 SD115.07</td> <td>0.0002 vs L</td> </tr> <tr> <td><i>IVRL</i></td> <td>-128.3 SD114.34</td> <td>&lt;0.0001 vs L</td> </tr> <tr> <td><i>L</i></td> <td>-61.3 SD132.29</td> <td></td> </tr> </tbody> </table>                                                                                                                                                                                                                                                                                                                                                                                                                                                                                                                                                            |  | CMT ( $\mu\text{m}$ )                              | p | <i>IVR</i>              | -118.7 SD115.07 | 0.0002 vs L      | <i>IVRL</i>        | -128.3 SD114.34 | <0.0001 vs L     | <i>L</i>            | -61.3 SD132.29 |  |  |                                                       |  |                         |                            |              |                    |                            |              |                     |                           |  |
|                                                                                                                                                                         | CMT ( $\mu\text{m}$ )                                                                                                                                                                                                                                                                                                                                                                                                                                                                                                                                                                                                                      | p                                                                                                                                                                                                                                                                                                                                                                                                                                                         |                                                                                                                                                                                                                                                                                                                                                                                                                                                                                                                                                                                                                                                                                                                                                                                                                                                                                                                                |  |                                                    |   |                         |                 |                  |                    |                 |                  |                     |                |  |  |                                                       |  |                         |                            |              |                    |                            |              |                     |                           |  |
| <i>IVR</i>                                                                                                                                                              | -118.7 SD115.07                                                                                                                                                                                                                                                                                                                                                                                                                                                                                                                                                                                                                            | 0.0002 vs L                                                                                                                                                                                                                                                                                                                                                                                                                                               |                                                                                                                                                                                                                                                                                                                                                                                                                                                                                                                                                                                                                                                                                                                                                                                                                                                                                                                                |  |                                                    |   |                         |                 |                  |                    |                 |                  |                     |                |  |  |                                                       |  |                         |                            |              |                    |                            |              |                     |                           |  |
| <i>IVRL</i>                                                                                                                                                             | -128.3 SD114.34                                                                                                                                                                                                                                                                                                                                                                                                                                                                                                                                                                                                                            | <0.0001 vs L                                                                                                                                                                                                                                                                                                                                                                                                                                              |                                                                                                                                                                                                                                                                                                                                                                                                                                                                                                                                                                                                                                                                                                                                                                                                                                                                                                                                |  |                                                    |   |                         |                 |                  |                    |                 |                  |                     |                |  |  |                                                       |  |                         |                            |              |                    |                            |              |                     |                           |  |
| <i>L</i>                                                                                                                                                                | -61.3 SD132.29                                                                                                                                                                                                                                                                                                                                                                                                                                                                                                                                                                                                                             |                                                                                                                                                                                                                                                                                                                                                                                                                                                           |                                                                                                                                                                                                                                                                                                                                                                                                                                                                                                                                                                                                                                                                                                                                                                                                                                                                                                                                |  |                                                    |   |                         |                 |                  |                    |                 |                  |                     |                |  |  |                                                       |  |                         |                            |              |                    |                            |              |                     |                           |  |
| <b>REVEAL Study (Ohji 2012)</b><br><b>Japan</b><br>Multicenter[48]<br><br><b>Design:</b> phase III double-masked RCT<br><b>Follow-up:</b> 12 months                     | <b>N:</b> 396 patients<br><b>Inclusion criteria:</b> NR<br><b>Exclusion criteria:</b> NR<br><b>Age:</b> 61.1 years<br><b>Sex:</b> NR<br><b>Diabetes type:</b> 98.7% with type 2 diabetes<br><b>HbA1c:</b> 7.5%<br><b>Baseline VA:</b> 58.6 letters<br><b>Baseline CMT:</b> 421.9 $\mu\text{m}$<br><b>Comorbidities:</b> NR                                                                                                                                                                                                                                                                                                                 | <b>Group 1 (IVR 0.5 + sham laser, n=133):</b> Day 1, month 1, 2 and pro-re-nata thereafter based on BCVA<br><b>Group 2 (IVR 0.5+ active laser, n=132):</b> Day 1, month 1, 2 and pro-re-nata thereafter based on BCVA<br><b>Group 3 (sham injection + active laser, n=131):</b> Day 1, month 1, 2 and pro-re-nata thereafter based on BCVA<br><br>Active/sham laser photocoagulation performed according to ETDRS guidelines at $\geq 3$ month intervals. | <b>At 12 months BCVA:</b> <table border="1"> <thead> <tr> <th></th> <th>Mean average change from baseline to month 1 to 12</th> <th>p</th> </tr> </thead> <tbody> <tr> <td><i>IVR + sham laser</i></td> <td>+5.9</td> <td>vs laser &lt;0.0001</td> </tr> <tr> <td><i>IVR + laser</i></td> <td>+5.7</td> <td>vs laser &lt;0.0001</td> </tr> <tr> <td><i>Laser + sham</i></td> <td>+1.4</td> <td></td> </tr> </tbody> </table><br><table border="1"> <thead> <tr> <th></th> <th>Mean change from baseline to month 12 in BCVA and CRT</th> <th></th> </tr> </thead> <tbody> <tr> <td><i>IVR + sham laser</i></td> <td>+6.6; -148.0 <math>\mu\text{m}</math></td> <td>vs C &lt;0.0001</td> </tr> <tr> <td><i>IVR + laser</i></td> <td>+6.4; -163.8 <math>\mu\text{m}</math></td> <td>vs C &lt;0.0001</td> </tr> <tr> <td><i>Laser + sham</i></td> <td>+1.8; -57.1 <math>\mu\text{m}</math></td> <td></td> </tr> </tbody> </table> |  | Mean average change from baseline to month 1 to 12 | p | <i>IVR + sham laser</i> | +5.9            | vs laser <0.0001 | <i>IVR + laser</i> | +5.7            | vs laser <0.0001 | <i>Laser + sham</i> | +1.4           |  |  | Mean change from baseline to month 12 in BCVA and CRT |  | <i>IVR + sham laser</i> | +6.6; -148.0 $\mu\text{m}$ | vs C <0.0001 | <i>IVR + laser</i> | +6.4; -163.8 $\mu\text{m}$ | vs C <0.0001 | <i>Laser + sham</i> | +1.8; -57.1 $\mu\text{m}$ |  |
|                                                                                                                                                                         | Mean average change from baseline to month 1 to 12                                                                                                                                                                                                                                                                                                                                                                                                                                                                                                                                                                                         | p                                                                                                                                                                                                                                                                                                                                                                                                                                                         |                                                                                                                                                                                                                                                                                                                                                                                                                                                                                                                                                                                                                                                                                                                                                                                                                                                                                                                                |  |                                                    |   |                         |                 |                  |                    |                 |                  |                     |                |  |  |                                                       |  |                         |                            |              |                    |                            |              |                     |                           |  |
| <i>IVR + sham laser</i>                                                                                                                                                 | +5.9                                                                                                                                                                                                                                                                                                                                                                                                                                                                                                                                                                                                                                       | vs laser <0.0001                                                                                                                                                                                                                                                                                                                                                                                                                                          |                                                                                                                                                                                                                                                                                                                                                                                                                                                                                                                                                                                                                                                                                                                                                                                                                                                                                                                                |  |                                                    |   |                         |                 |                  |                    |                 |                  |                     |                |  |  |                                                       |  |                         |                            |              |                    |                            |              |                     |                           |  |
| <i>IVR + laser</i>                                                                                                                                                      | +5.7                                                                                                                                                                                                                                                                                                                                                                                                                                                                                                                                                                                                                                       | vs laser <0.0001                                                                                                                                                                                                                                                                                                                                                                                                                                          |                                                                                                                                                                                                                                                                                                                                                                                                                                                                                                                                                                                                                                                                                                                                                                                                                                                                                                                                |  |                                                    |   |                         |                 |                  |                    |                 |                  |                     |                |  |  |                                                       |  |                         |                            |              |                    |                            |              |                     |                           |  |
| <i>Laser + sham</i>                                                                                                                                                     | +1.4                                                                                                                                                                                                                                                                                                                                                                                                                                                                                                                                                                                                                                       |                                                                                                                                                                                                                                                                                                                                                                                                                                                           |                                                                                                                                                                                                                                                                                                                                                                                                                                                                                                                                                                                                                                                                                                                                                                                                                                                                                                                                |  |                                                    |   |                         |                 |                  |                    |                 |                  |                     |                |  |  |                                                       |  |                         |                            |              |                    |                            |              |                     |                           |  |
|                                                                                                                                                                         | Mean change from baseline to month 12 in BCVA and CRT                                                                                                                                                                                                                                                                                                                                                                                                                                                                                                                                                                                      |                                                                                                                                                                                                                                                                                                                                                                                                                                                           |                                                                                                                                                                                                                                                                                                                                                                                                                                                                                                                                                                                                                                                                                                                                                                                                                                                                                                                                |  |                                                    |   |                         |                 |                  |                    |                 |                  |                     |                |  |  |                                                       |  |                         |                            |              |                    |                            |              |                     |                           |  |
| <i>IVR + sham laser</i>                                                                                                                                                 | +6.6; -148.0 $\mu\text{m}$                                                                                                                                                                                                                                                                                                                                                                                                                                                                                                                                                                                                                 | vs C <0.0001                                                                                                                                                                                                                                                                                                                                                                                                                                              |                                                                                                                                                                                                                                                                                                                                                                                                                                                                                                                                                                                                                                                                                                                                                                                                                                                                                                                                |  |                                                    |   |                         |                 |                  |                    |                 |                  |                     |                |  |  |                                                       |  |                         |                            |              |                    |                            |              |                     |                           |  |
| <i>IVR + laser</i>                                                                                                                                                      | +6.4; -163.8 $\mu\text{m}$                                                                                                                                                                                                                                                                                                                                                                                                                                                                                                                                                                                                                 | vs C <0.0001                                                                                                                                                                                                                                                                                                                                                                                                                                              |                                                                                                                                                                                                                                                                                                                                                                                                                                                                                                                                                                                                                                                                                                                                                                                                                                                                                                                                |  |                                                    |   |                         |                 |                  |                    |                 |                  |                     |                |  |  |                                                       |  |                         |                            |              |                    |                            |              |                     |                           |  |
| <i>Laser + sham</i>                                                                                                                                                     | +1.8; -57.1 $\mu\text{m}$                                                                                                                                                                                                                                                                                                                                                                                                                                                                                                                                                                                                                  |                                                                                                                                                                                                                                                                                                                                                                                                                                                           |                                                                                                                                                                                                                                                                                                                                                                                                                                                                                                                                                                                                                                                                                                                                                                                                                                                                                                                                |  |                                                    |   |                         |                 |                  |                    |                 |                  |                     |                |  |  |                                                       |  |                         |                            |              |                    |                            |              |                     |                           |  |
| <b>RISE Study (Brown 2011/Nguyen 2012)[38,135]</b><br><b>USA</b><br>Multicenter<br><b>Design:</b> 3-arm double-blind sham-controlled RCT<br><b>Follow-up:</b> 24 months | <b>N:</b> 377 eyes of 377 patients<br><b>Inclusion criteria:</b> $\geq 18$ years, type 1 or 2 diabetes, BCVA 20/40 to 20/320, DMO CMT $\geq 275$ $\mu\text{m}$<br><b>Exclusion criteria:</b> prior vitreoretinal surgery, recent history (within 3 months of screening) of panretinal or macular laser in the study eye, intraocular corticosteroids or antiangiogenic drugs, those with uncontrolled hypertension, uncontrolled diabetes (HbA1c $> 12\%$ ), recent (within 3 months) cerebrovascular accident or myocardial infarction<br><b>Age:</b> 61.7 to 62.8 SD8.9 to 10.0 (range 21 to 87) years<br><b>Sex:</b> 41.6 to 48% female | <b>Group 1 (IVR0.3, n=125 eyes):</b> 0.3 mg IV ranibizumab<br><b>Group 2 (IVR0.5, n=125 eyes):</b> 0.5 mg IV ranibizumab<br><b>Group 3 (C, n=127 eyes):</b> sham injection<br><b>Regimen for all groups:</b> monthly injections; need for macular rescue laser assessed monthly starting at month 3                                                                                                                                                       | <b>At 24 months BCVA:</b> <table border="1"> <thead> <tr> <th></th> <th>plus <math>\geq 15</math> letters</th> <th>p</th> </tr> </thead> <tbody> <tr> <td><i>IVR0.3</i></td> <td>44.8%</td> <td>&lt;0.0001 vs C</td> </tr> <tr> <td><i>IVR0.5</i></td> <td>39.2%</td> <td>=0.0002 vs C</td> </tr> <tr> <td><i>C</i></td> <td>18.1%</td> <td></td> </tr> </tbody> </table><br><table border="1"> <thead> <tr> <th></th> <th>Loss of <math>&lt; 15</math> letters</th> <th></th> </tr> </thead> <tbody> <tr> <td><i>IVR0.3</i></td> <td>97.6%</td> <td>=0.0086 vs C</td> </tr> <tr> <td><i>IVR0.5</i></td> <td>97.6%</td> <td>=0.0126 vs C</td> </tr> <tr> <td><i>C</i></td> <td>89.8%</td> <td></td> </tr> </tbody> </table>                                                                                                                                                                                                    |  | plus $\geq 15$ letters                             | p | <i>IVR0.3</i>           | 44.8%           | <0.0001 vs C     | <i>IVR0.5</i>      | 39.2%           | =0.0002 vs C     | <i>C</i>            | 18.1%          |  |  | Loss of $< 15$ letters                                |  | <i>IVR0.3</i>           | 97.6%                      | =0.0086 vs C | <i>IVR0.5</i>      | 97.6%                      | =0.0126 vs C | <i>C</i>            | 89.8%                     |  |
|                                                                                                                                                                         | plus $\geq 15$ letters                                                                                                                                                                                                                                                                                                                                                                                                                                                                                                                                                                                                                     | p                                                                                                                                                                                                                                                                                                                                                                                                                                                         |                                                                                                                                                                                                                                                                                                                                                                                                                                                                                                                                                                                                                                                                                                                                                                                                                                                                                                                                |  |                                                    |   |                         |                 |                  |                    |                 |                  |                     |                |  |  |                                                       |  |                         |                            |              |                    |                            |              |                     |                           |  |
| <i>IVR0.3</i>                                                                                                                                                           | 44.8%                                                                                                                                                                                                                                                                                                                                                                                                                                                                                                                                                                                                                                      | <0.0001 vs C                                                                                                                                                                                                                                                                                                                                                                                                                                              |                                                                                                                                                                                                                                                                                                                                                                                                                                                                                                                                                                                                                                                                                                                                                                                                                                                                                                                                |  |                                                    |   |                         |                 |                  |                    |                 |                  |                     |                |  |  |                                                       |  |                         |                            |              |                    |                            |              |                     |                           |  |
| <i>IVR0.5</i>                                                                                                                                                           | 39.2%                                                                                                                                                                                                                                                                                                                                                                                                                                                                                                                                                                                                                                      | =0.0002 vs C                                                                                                                                                                                                                                                                                                                                                                                                                                              |                                                                                                                                                                                                                                                                                                                                                                                                                                                                                                                                                                                                                                                                                                                                                                                                                                                                                                                                |  |                                                    |   |                         |                 |                  |                    |                 |                  |                     |                |  |  |                                                       |  |                         |                            |              |                    |                            |              |                     |                           |  |
| <i>C</i>                                                                                                                                                                | 18.1%                                                                                                                                                                                                                                                                                                                                                                                                                                                                                                                                                                                                                                      |                                                                                                                                                                                                                                                                                                                                                                                                                                                           |                                                                                                                                                                                                                                                                                                                                                                                                                                                                                                                                                                                                                                                                                                                                                                                                                                                                                                                                |  |                                                    |   |                         |                 |                  |                    |                 |                  |                     |                |  |  |                                                       |  |                         |                            |              |                    |                            |              |                     |                           |  |
|                                                                                                                                                                         | Loss of $< 15$ letters                                                                                                                                                                                                                                                                                                                                                                                                                                                                                                                                                                                                                     |                                                                                                                                                                                                                                                                                                                                                                                                                                                           |                                                                                                                                                                                                                                                                                                                                                                                                                                                                                                                                                                                                                                                                                                                                                                                                                                                                                                                                |  |                                                    |   |                         |                 |                  |                    |                 |                  |                     |                |  |  |                                                       |  |                         |                            |              |                    |                            |              |                     |                           |  |
| <i>IVR0.3</i>                                                                                                                                                           | 97.6%                                                                                                                                                                                                                                                                                                                                                                                                                                                                                                                                                                                                                                      | =0.0086 vs C                                                                                                                                                                                                                                                                                                                                                                                                                                              |                                                                                                                                                                                                                                                                                                                                                                                                                                                                                                                                                                                                                                                                                                                                                                                                                                                                                                                                |  |                                                    |   |                         |                 |                  |                    |                 |                  |                     |                |  |  |                                                       |  |                         |                            |              |                    |                            |              |                     |                           |  |
| <i>IVR0.5</i>                                                                                                                                                           | 97.6%                                                                                                                                                                                                                                                                                                                                                                                                                                                                                                                                                                                                                                      | =0.0126 vs C                                                                                                                                                                                                                                                                                                                                                                                                                                              |                                                                                                                                                                                                                                                                                                                                                                                                                                                                                                                                                                                                                                                                                                                                                                                                                                                                                                                                |  |                                                    |   |                         |                 |                  |                    |                 |                  |                     |                |  |  |                                                       |  |                         |                            |              |                    |                            |              |                     |                           |  |
| <i>C</i>                                                                                                                                                                | 89.8%                                                                                                                                                                                                                                                                                                                                                                                                                                                                                                                                                                                                                                      |                                                                                                                                                                                                                                                                                                                                                                                                                                                           |                                                                                                                                                                                                                                                                                                                                                                                                                                                                                                                                                                                                                                                                                                                                                                                                                                                                                                                                |  |                                                    |   |                         |                 |                  |                    |                 |                  |                     |                |  |  |                                                       |  |                         |                            |              |                    |                            |              |                     |                           |  |

| Study                                                                                                                                                                                  | Participants and baseline values                                                                                                                                                                                                                                                                                                                                                                                                                                                                                                                                                                                                                                                                                                                                                         | Intervention                                                                                                                                                                                                                                                                                  | Outcome (change from baseline at study end)                                                                                                                                                                                                                                                                                                                                                                                                                                                                                                                                                                                                                                                                                                                                                                                                                                                                                                                                         |               |                      |              |               |       |               |               |       |               |               |              |              |               |              |              |               |             |             |          |                           |   |               |                |              |               |                |              |          |                |  |
|----------------------------------------------------------------------------------------------------------------------------------------------------------------------------------------|------------------------------------------------------------------------------------------------------------------------------------------------------------------------------------------------------------------------------------------------------------------------------------------------------------------------------------------------------------------------------------------------------------------------------------------------------------------------------------------------------------------------------------------------------------------------------------------------------------------------------------------------------------------------------------------------------------------------------------------------------------------------------------------|-----------------------------------------------------------------------------------------------------------------------------------------------------------------------------------------------------------------------------------------------------------------------------------------------|-------------------------------------------------------------------------------------------------------------------------------------------------------------------------------------------------------------------------------------------------------------------------------------------------------------------------------------------------------------------------------------------------------------------------------------------------------------------------------------------------------------------------------------------------------------------------------------------------------------------------------------------------------------------------------------------------------------------------------------------------------------------------------------------------------------------------------------------------------------------------------------------------------------------------------------------------------------------------------------|---------------|----------------------|--------------|---------------|-------|---------------|---------------|-------|---------------|---------------|--------------|--------------|---------------|--------------|--------------|---------------|-------------|-------------|----------|---------------------------|---|---------------|----------------|--------------|---------------|----------------|--------------|----------|----------------|--|
|                                                                                                                                                                                        | <p><b>Diabetes type:</b> type 1 or 2<br/> <b>HbA1c:</b> 7.7% SD 1.4 to 1.5; ≤8% (65 to 68.3%); &gt;8% (31.7% to 35%)<br/> <b>Baseline VA:</b> Mean ETDRS letter score 54.7 to 57.2; ≤20/200 (7.9 to 13.6%); &gt;20/200 but &lt;20/40 (72.4 to 72.8%); ≥20/40 (13.6 to 19.7%)<br/> <b>Baseline CMT:</b> 463.8 to 474.5 μm<br/> <b>Comorbidities:</b> History of smoking 46.4 to 51.2%</p>                                                                                                                                                                                                                                                                                                                                                                                                 |                                                                                                                                                                                                                                                                                               | <p><b>Snellen equivalent of 20/40 or better</b></p> <table border="1"> <tr> <td><i>IVR0.3</i></td> <td>60.0%</td> <td>&lt;0.0001 vs C</td> </tr> <tr> <td><i>IVR0.5</i></td> <td>63.2%</td> <td>&lt;0.0001 vs C</td> </tr> <tr> <td><i>C</i></td> <td>37.8%</td> <td></td> </tr> </table> <p><b>Mean BCVA gain (letters)</b></p> <table border="1"> <tr> <td><i>IVR0.3</i></td> <td>+12.5 SD14.1</td> <td>&lt;0.0001 vs C</td> </tr> <tr> <td><i>IVR0.5</i></td> <td>+11.9 SD12.1</td> <td>&lt;0.0001 vs C</td> </tr> <tr> <td><i>C</i></td> <td>+2.6 SD13.9</td> <td></td> </tr> </table> <p><b>CFT:</b></p> <table border="1"> <thead> <tr> <th></th> <th>Mean change from baseline</th> <th>p</th> </tr> </thead> <tbody> <tr> <td><i>IVR0.3</i></td> <td>-250.6 SD212.2</td> <td>&lt;0.0001 vs C</td> </tr> <tr> <td><i>IVR0.5</i></td> <td>-253.1 SD183.7</td> <td>&lt;0.0001 vs C</td> </tr> <tr> <td><i>C</i></td> <td>-133.4 SD209.0</td> <td></td> </tr> </tbody> </table> | <i>IVR0.3</i> | 60.0%                | <0.0001 vs C | <i>IVR0.5</i> | 63.2% | <0.0001 vs C  | <i>C</i>      | 37.8% |               | <i>IVR0.3</i> | +12.5 SD14.1 | <0.0001 vs C | <i>IVR0.5</i> | +11.9 SD12.1 | <0.0001 vs C | <i>C</i>      | +2.6 SD13.9 |             |          | Mean change from baseline | p | <i>IVR0.3</i> | -250.6 SD212.2 | <0.0001 vs C | <i>IVR0.5</i> | -253.1 SD183.7 | <0.0001 vs C | <i>C</i> | -133.4 SD209.0 |  |
| <i>IVR0.3</i>                                                                                                                                                                          | 60.0%                                                                                                                                                                                                                                                                                                                                                                                                                                                                                                                                                                                                                                                                                                                                                                                    | <0.0001 vs C                                                                                                                                                                                                                                                                                  |                                                                                                                                                                                                                                                                                                                                                                                                                                                                                                                                                                                                                                                                                                                                                                                                                                                                                                                                                                                     |               |                      |              |               |       |               |               |       |               |               |              |              |               |              |              |               |             |             |          |                           |   |               |                |              |               |                |              |          |                |  |
| <i>IVR0.5</i>                                                                                                                                                                          | 63.2%                                                                                                                                                                                                                                                                                                                                                                                                                                                                                                                                                                                                                                                                                                                                                                                    | <0.0001 vs C                                                                                                                                                                                                                                                                                  |                                                                                                                                                                                                                                                                                                                                                                                                                                                                                                                                                                                                                                                                                                                                                                                                                                                                                                                                                                                     |               |                      |              |               |       |               |               |       |               |               |              |              |               |              |              |               |             |             |          |                           |   |               |                |              |               |                |              |          |                |  |
| <i>C</i>                                                                                                                                                                               | 37.8%                                                                                                                                                                                                                                                                                                                                                                                                                                                                                                                                                                                                                                                                                                                                                                                    |                                                                                                                                                                                                                                                                                               |                                                                                                                                                                                                                                                                                                                                                                                                                                                                                                                                                                                                                                                                                                                                                                                                                                                                                                                                                                                     |               |                      |              |               |       |               |               |       |               |               |              |              |               |              |              |               |             |             |          |                           |   |               |                |              |               |                |              |          |                |  |
| <i>IVR0.3</i>                                                                                                                                                                          | +12.5 SD14.1                                                                                                                                                                                                                                                                                                                                                                                                                                                                                                                                                                                                                                                                                                                                                                             | <0.0001 vs C                                                                                                                                                                                                                                                                                  |                                                                                                                                                                                                                                                                                                                                                                                                                                                                                                                                                                                                                                                                                                                                                                                                                                                                                                                                                                                     |               |                      |              |               |       |               |               |       |               |               |              |              |               |              |              |               |             |             |          |                           |   |               |                |              |               |                |              |          |                |  |
| <i>IVR0.5</i>                                                                                                                                                                          | +11.9 SD12.1                                                                                                                                                                                                                                                                                                                                                                                                                                                                                                                                                                                                                                                                                                                                                                             | <0.0001 vs C                                                                                                                                                                                                                                                                                  |                                                                                                                                                                                                                                                                                                                                                                                                                                                                                                                                                                                                                                                                                                                                                                                                                                                                                                                                                                                     |               |                      |              |               |       |               |               |       |               |               |              |              |               |              |              |               |             |             |          |                           |   |               |                |              |               |                |              |          |                |  |
| <i>C</i>                                                                                                                                                                               | +2.6 SD13.9                                                                                                                                                                                                                                                                                                                                                                                                                                                                                                                                                                                                                                                                                                                                                                              |                                                                                                                                                                                                                                                                                               |                                                                                                                                                                                                                                                                                                                                                                                                                                                                                                                                                                                                                                                                                                                                                                                                                                                                                                                                                                                     |               |                      |              |               |       |               |               |       |               |               |              |              |               |              |              |               |             |             |          |                           |   |               |                |              |               |                |              |          |                |  |
|                                                                                                                                                                                        | Mean change from baseline                                                                                                                                                                                                                                                                                                                                                                                                                                                                                                                                                                                                                                                                                                                                                                | p                                                                                                                                                                                                                                                                                             |                                                                                                                                                                                                                                                                                                                                                                                                                                                                                                                                                                                                                                                                                                                                                                                                                                                                                                                                                                                     |               |                      |              |               |       |               |               |       |               |               |              |              |               |              |              |               |             |             |          |                           |   |               |                |              |               |                |              |          |                |  |
| <i>IVR0.3</i>                                                                                                                                                                          | -250.6 SD212.2                                                                                                                                                                                                                                                                                                                                                                                                                                                                                                                                                                                                                                                                                                                                                                           | <0.0001 vs C                                                                                                                                                                                                                                                                                  |                                                                                                                                                                                                                                                                                                                                                                                                                                                                                                                                                                                                                                                                                                                                                                                                                                                                                                                                                                                     |               |                      |              |               |       |               |               |       |               |               |              |              |               |              |              |               |             |             |          |                           |   |               |                |              |               |                |              |          |                |  |
| <i>IVR0.5</i>                                                                                                                                                                          | -253.1 SD183.7                                                                                                                                                                                                                                                                                                                                                                                                                                                                                                                                                                                                                                                                                                                                                                           | <0.0001 vs C                                                                                                                                                                                                                                                                                  |                                                                                                                                                                                                                                                                                                                                                                                                                                                                                                                                                                                                                                                                                                                                                                                                                                                                                                                                                                                     |               |                      |              |               |       |               |               |       |               |               |              |              |               |              |              |               |             |             |          |                           |   |               |                |              |               |                |              |          |                |  |
| <i>C</i>                                                                                                                                                                               | -133.4 SD209.0                                                                                                                                                                                                                                                                                                                                                                                                                                                                                                                                                                                                                                                                                                                                                                           |                                                                                                                                                                                                                                                                                               |                                                                                                                                                                                                                                                                                                                                                                                                                                                                                                                                                                                                                                                                                                                                                                                                                                                                                                                                                                                     |               |                      |              |               |       |               |               |       |               |               |              |              |               |              |              |               |             |             |          |                           |   |               |                |              |               |                |              |          |                |  |
| <p><b>RIDE study (Boyer 2011/Nguyen 2012)[38,136] USA</b><br/>           Multicentre</p> <p><b>Design:</b> 3-arm double-blind sham-controlled RCT<br/> <b>Follow-up:</b> 24 months</p> | <p><b>N:</b> 382 eyes<br/> <b>Inclusion criteria:</b> ≥18 years, type 1 or 2 diabetes, BCVA 20/40-20/320 and DMO CMT ≥275 μm<br/> <b>Exclusion criteria:</b> prior vitreoretinal surgery, recent history (within 3 months of screening) of panretinal or macular laser in the study eye, intraocular corticosteroids or antiangiogenic drugs, those with uncontrolled hypertension, uncontrolled diabetes (HbA1c &gt;12%), recent (within 3 months) cerebrovascular accident or myocardial infarction<br/> <b>Age:</b> 61.8 to 63.5 (range 22 to 91) years<br/> <b>Sex:</b> 37 to 49.1% female<br/> <b>Diabetes type:</b> type 1 or 2<br/> <b>HbA1c:</b> 7.6 SD1.3 to 1.5; ≤8% (65.8 to 67.5%); &gt;8% (32.5 to 34.2%)<br/> <b>Baseline VA:</b> Mean ETDRS letter score 56.9 to 57.5</p> | <p><b>Group 1 (IVR0.3, n=125 eyes):</b> 0.3 mg IV ranibizumab<br/> <b>Group 2 (IVR0.5, n=127 eyes):</b> 0.5 mg IV ranibizumab<br/> <b>Group 3 (C, n=130 eyes):</b> sham injection<br/> <b>Regimen for all groups:</b> Patients were eligible for rescue macular laser starting at Month 3</p> | <p><b>At 24 months BCVA:</b></p> <table border="1"> <thead> <tr> <th></th> <th>More than 15 letters</th> <th>p</th> </tr> </thead> <tbody> <tr> <td><i>IVR0.3</i></td> <td>33.6%</td> <td>&lt;0.0001 vs. C</td> </tr> <tr> <td><i>IVR0.5</i></td> <td>45.7%</td> <td>&lt;0.0001 vs. C</td> </tr> <tr> <td><i>C</i></td> <td>12.3%</td> <td></td> </tr> </tbody> </table> <p><b>Less than 15 letters</b></p> <table border="1"> <tr> <td><i>IVR0.3</i></td> <td>1.6%</td> <td>&gt;0.05 vs C</td> </tr> <tr> <td><i>IVR0.5</i></td> <td>3.9%</td> <td>&lt;0.05 vs. C</td> </tr> <tr> <td><i>C</i></td> <td>8.5%</td> <td></td> </tr> </table> <p><b>Snellen equivalent of 20/40 or better</b></p> <table border="1"> <tr> <td><i>IVR0.3</i></td> <td>54.4%</td> <td>=0.0002 vs C</td> </tr> </table>                                                                                                                                                                                  |               | More than 15 letters | p            | <i>IVR0.3</i> | 33.6% | <0.0001 vs. C | <i>IVR0.5</i> | 45.7% | <0.0001 vs. C | <i>C</i>      | 12.3%        |              | <i>IVR0.3</i> | 1.6%         | >0.05 vs C   | <i>IVR0.5</i> | 3.9%        | <0.05 vs. C | <i>C</i> | 8.5%                      |   | <i>IVR0.3</i> | 54.4%          | =0.0002 vs C |               |                |              |          |                |  |
|                                                                                                                                                                                        | More than 15 letters                                                                                                                                                                                                                                                                                                                                                                                                                                                                                                                                                                                                                                                                                                                                                                     | p                                                                                                                                                                                                                                                                                             |                                                                                                                                                                                                                                                                                                                                                                                                                                                                                                                                                                                                                                                                                                                                                                                                                                                                                                                                                                                     |               |                      |              |               |       |               |               |       |               |               |              |              |               |              |              |               |             |             |          |                           |   |               |                |              |               |                |              |          |                |  |
| <i>IVR0.3</i>                                                                                                                                                                          | 33.6%                                                                                                                                                                                                                                                                                                                                                                                                                                                                                                                                                                                                                                                                                                                                                                                    | <0.0001 vs. C                                                                                                                                                                                                                                                                                 |                                                                                                                                                                                                                                                                                                                                                                                                                                                                                                                                                                                                                                                                                                                                                                                                                                                                                                                                                                                     |               |                      |              |               |       |               |               |       |               |               |              |              |               |              |              |               |             |             |          |                           |   |               |                |              |               |                |              |          |                |  |
| <i>IVR0.5</i>                                                                                                                                                                          | 45.7%                                                                                                                                                                                                                                                                                                                                                                                                                                                                                                                                                                                                                                                                                                                                                                                    | <0.0001 vs. C                                                                                                                                                                                                                                                                                 |                                                                                                                                                                                                                                                                                                                                                                                                                                                                                                                                                                                                                                                                                                                                                                                                                                                                                                                                                                                     |               |                      |              |               |       |               |               |       |               |               |              |              |               |              |              |               |             |             |          |                           |   |               |                |              |               |                |              |          |                |  |
| <i>C</i>                                                                                                                                                                               | 12.3%                                                                                                                                                                                                                                                                                                                                                                                                                                                                                                                                                                                                                                                                                                                                                                                    |                                                                                                                                                                                                                                                                                               |                                                                                                                                                                                                                                                                                                                                                                                                                                                                                                                                                                                                                                                                                                                                                                                                                                                                                                                                                                                     |               |                      |              |               |       |               |               |       |               |               |              |              |               |              |              |               |             |             |          |                           |   |               |                |              |               |                |              |          |                |  |
| <i>IVR0.3</i>                                                                                                                                                                          | 1.6%                                                                                                                                                                                                                                                                                                                                                                                                                                                                                                                                                                                                                                                                                                                                                                                     | >0.05 vs C                                                                                                                                                                                                                                                                                    |                                                                                                                                                                                                                                                                                                                                                                                                                                                                                                                                                                                                                                                                                                                                                                                                                                                                                                                                                                                     |               |                      |              |               |       |               |               |       |               |               |              |              |               |              |              |               |             |             |          |                           |   |               |                |              |               |                |              |          |                |  |
| <i>IVR0.5</i>                                                                                                                                                                          | 3.9%                                                                                                                                                                                                                                                                                                                                                                                                                                                                                                                                                                                                                                                                                                                                                                                     | <0.05 vs. C                                                                                                                                                                                                                                                                                   |                                                                                                                                                                                                                                                                                                                                                                                                                                                                                                                                                                                                                                                                                                                                                                                                                                                                                                                                                                                     |               |                      |              |               |       |               |               |       |               |               |              |              |               |              |              |               |             |             |          |                           |   |               |                |              |               |                |              |          |                |  |
| <i>C</i>                                                                                                                                                                               | 8.5%                                                                                                                                                                                                                                                                                                                                                                                                                                                                                                                                                                                                                                                                                                                                                                                     |                                                                                                                                                                                                                                                                                               |                                                                                                                                                                                                                                                                                                                                                                                                                                                                                                                                                                                                                                                                                                                                                                                                                                                                                                                                                                                     |               |                      |              |               |       |               |               |       |               |               |              |              |               |              |              |               |             |             |          |                           |   |               |                |              |               |                |              |          |                |  |
| <i>IVR0.3</i>                                                                                                                                                                          | 54.4%                                                                                                                                                                                                                                                                                                                                                                                                                                                                                                                                                                                                                                                                                                                                                                                    | =0.0002 vs C                                                                                                                                                                                                                                                                                  |                                                                                                                                                                                                                                                                                                                                                                                                                                                                                                                                                                                                                                                                                                                                                                                                                                                                                                                                                                                     |               |                      |              |               |       |               |               |       |               |               |              |              |               |              |              |               |             |             |          |                           |   |               |                |              |               |                |              |          |                |  |

1  
2  
3  
4  
5  
6  
7  
8  
9  
10  
11  
12  
13  
14  
15  
16  
17  
18  
19  
20  
21  
22  
23  
24  
25  
26  
27  
28  
29  
30  
31  
32  
33  
34  
35  
36  
37  
38  
39  
40  
41  
42  
43  
44  
45  
46  
47  
48  
49

| Study                           | Participants and baseline values                                                                 | Intervention | Outcome (change from baseline at study end)                                                                                                                                                                                                                                                                                                                                                                                                                                                                                                                                                                                                                                                                                                                                                                                 |               |       |              |          |       |  |                                 |  |  |               |              |              |               |              |              |          |             |  |             |  |  |  |                                  |          |               |                |              |               |                |              |          |                |  |
|---------------------------------|--------------------------------------------------------------------------------------------------|--------------|-----------------------------------------------------------------------------------------------------------------------------------------------------------------------------------------------------------------------------------------------------------------------------------------------------------------------------------------------------------------------------------------------------------------------------------------------------------------------------------------------------------------------------------------------------------------------------------------------------------------------------------------------------------------------------------------------------------------------------------------------------------------------------------------------------------------------------|---------------|-------|--------------|----------|-------|--|---------------------------------|--|--|---------------|--------------|--------------|---------------|--------------|--------------|----------|-------------|--|-------------|--|--|--|----------------------------------|----------|---------------|----------------|--------------|---------------|----------------|--------------|----------|----------------|--|
|                                 | <b>Baseline CMT:</b> 447.4 to 482.6 µm<br><b>Comorbidities:</b> history of smoking 33.6 to 51.6% |              | <table border="1"> <tr> <td><b>IVR0.5</b></td> <td>62.2%</td> <td>&lt;0.0001 vs C</td> </tr> <tr> <td><b>C</b></td> <td>34.6%</td> <td></td> </tr> <tr> <td colspan="3"><b>Mean BCVA gain (letters)</b></td> </tr> <tr> <td><b>IVR0.3</b></td> <td>+10.9 SD10.4</td> <td>&lt;0.0001 vs C</td> </tr> <tr> <td><b>IVR0.5</b></td> <td>+12.0 SD14.9</td> <td>&lt;0.0001 vs C</td> </tr> <tr> <td><b>C</b></td> <td>+2.3 SD14.2</td> <td></td> </tr> <tr> <td colspan="3"><b>CMT:</b></td> </tr> <tr> <td></td> <td><b>Mean change from baseline</b></td> <td><b>p</b></td> </tr> <tr> <td><b>IVR0.3</b></td> <td>-259.8 SD169.3</td> <td>&lt;0.0001 vs C</td> </tr> <tr> <td><b>IVR0.5</b></td> <td>-270.7 SD201.6</td> <td>&lt;0.0001 vs C</td> </tr> <tr> <td><b>C</b></td> <td>-125.8 SD198.3</td> <td></td> </tr> </table> | <b>IVR0.5</b> | 62.2% | <0.0001 vs C | <b>C</b> | 34.6% |  | <b>Mean BCVA gain (letters)</b> |  |  | <b>IVR0.3</b> | +10.9 SD10.4 | <0.0001 vs C | <b>IVR0.5</b> | +12.0 SD14.9 | <0.0001 vs C | <b>C</b> | +2.3 SD14.2 |  | <b>CMT:</b> |  |  |  | <b>Mean change from baseline</b> | <b>p</b> | <b>IVR0.3</b> | -259.8 SD169.3 | <0.0001 vs C | <b>IVR0.5</b> | -270.7 SD201.6 | <0.0001 vs C | <b>C</b> | -125.8 SD198.3 |  |
| <b>IVR0.5</b>                   | 62.2%                                                                                            | <0.0001 vs C |                                                                                                                                                                                                                                                                                                                                                                                                                                                                                                                                                                                                                                                                                                                                                                                                                             |               |       |              |          |       |  |                                 |  |  |               |              |              |               |              |              |          |             |  |             |  |  |  |                                  |          |               |                |              |               |                |              |          |                |  |
| <b>C</b>                        | 34.6%                                                                                            |              |                                                                                                                                                                                                                                                                                                                                                                                                                                                                                                                                                                                                                                                                                                                                                                                                                             |               |       |              |          |       |  |                                 |  |  |               |              |              |               |              |              |          |             |  |             |  |  |  |                                  |          |               |                |              |               |                |              |          |                |  |
| <b>Mean BCVA gain (letters)</b> |                                                                                                  |              |                                                                                                                                                                                                                                                                                                                                                                                                                                                                                                                                                                                                                                                                                                                                                                                                                             |               |       |              |          |       |  |                                 |  |  |               |              |              |               |              |              |          |             |  |             |  |  |  |                                  |          |               |                |              |               |                |              |          |                |  |
| <b>IVR0.3</b>                   | +10.9 SD10.4                                                                                     | <0.0001 vs C |                                                                                                                                                                                                                                                                                                                                                                                                                                                                                                                                                                                                                                                                                                                                                                                                                             |               |       |              |          |       |  |                                 |  |  |               |              |              |               |              |              |          |             |  |             |  |  |  |                                  |          |               |                |              |               |                |              |          |                |  |
| <b>IVR0.5</b>                   | +12.0 SD14.9                                                                                     | <0.0001 vs C |                                                                                                                                                                                                                                                                                                                                                                                                                                                                                                                                                                                                                                                                                                                                                                                                                             |               |       |              |          |       |  |                                 |  |  |               |              |              |               |              |              |          |             |  |             |  |  |  |                                  |          |               |                |              |               |                |              |          |                |  |
| <b>C</b>                        | +2.3 SD14.2                                                                                      |              |                                                                                                                                                                                                                                                                                                                                                                                                                                                                                                                                                                                                                                                                                                                                                                                                                             |               |       |              |          |       |  |                                 |  |  |               |              |              |               |              |              |          |             |  |             |  |  |  |                                  |          |               |                |              |               |                |              |          |                |  |
| <b>CMT:</b>                     |                                                                                                  |              |                                                                                                                                                                                                                                                                                                                                                                                                                                                                                                                                                                                                                                                                                                                                                                                                                             |               |       |              |          |       |  |                                 |  |  |               |              |              |               |              |              |          |             |  |             |  |  |  |                                  |          |               |                |              |               |                |              |          |                |  |
|                                 | <b>Mean change from baseline</b>                                                                 | <b>p</b>     |                                                                                                                                                                                                                                                                                                                                                                                                                                                                                                                                                                                                                                                                                                                                                                                                                             |               |       |              |          |       |  |                                 |  |  |               |              |              |               |              |              |          |             |  |             |  |  |  |                                  |          |               |                |              |               |                |              |          |                |  |
| <b>IVR0.3</b>                   | -259.8 SD169.3                                                                                   | <0.0001 vs C |                                                                                                                                                                                                                                                                                                                                                                                                                                                                                                                                                                                                                                                                                                                                                                                                                             |               |       |              |          |       |  |                                 |  |  |               |              |              |               |              |              |          |             |  |             |  |  |  |                                  |          |               |                |              |               |                |              |          |                |  |
| <b>IVR0.5</b>                   | -270.7 SD201.6                                                                                   | <0.0001 vs C |                                                                                                                                                                                                                                                                                                                                                                                                                                                                                                                                                                                                                                                                                                                                                                                                                             |               |       |              |          |       |  |                                 |  |  |               |              |              |               |              |              |          |             |  |             |  |  |  |                                  |          |               |                |              |               |                |              |          |                |  |
| <b>C</b>                        | -125.8 SD198.3                                                                                   |              |                                                                                                                                                                                                                                                                                                                                                                                                                                                                                                                                                                                                                                                                                                                                                                                                                             |               |       |              |          |       |  |                                 |  |  |               |              |              |               |              |              |          |             |  |             |  |  |  |                                  |          |               |                |              |               |                |              |          |                |  |

**Abbreviations:** BCVA – best corrected visual acuity, CMT – central macular thickness, DM – diabetes mellitus, DMO – diabetic macular oedema, DP – diastolic pressure, DR – diabetic retinopathy, HR QoL – health-related quality of life, IOP – intraocular pressure, IQR – interquartile range, IV – intravitreal, NEI VFQ-25 – National Eye Institute Visual Function Questionnaire-25, NPDR – nonproliferative diabetic retinopathy, NR – not reported, OCT – optical coherence tomography, PDR – proliferative diabetic retinopathy, PRP – panretinal photocoagulation, RCT – randomized controlled trial, SD – standard deviation, SP – systolic pressure, VA – visual acuity, VEGF – vascular endothelia growth factor, vs – versus, CSME – clinically significant macular oedema, MLT/MPC – macular laser therapy/macular photocoagulation, IVR – intravitreal ranibizumab, IVB – intravitreal bevacizumab, IVP – intravitreal pegaptanib, IVVTE – intravitreal VEGF Trap Eye, C - control, DIL - dexamethasone followed by laser, DDS - dexamethasone, SRFA – fluocinolone, SOC – standard of care, IVT - intravitreal triamcinolone, L – laser, IVTL intravitreal triamcinolone plus laser **Notes:** injections are intravitreal unless otherwise noted

Table 3: Bevacizumab studies

| Study                                                                                                                                   | Participants and baseline values                                                                                                                                                                                                                                                                                                                                                                                                                                                                                                                                                                                                                                                                                                                                                                                                                                                                                                                                                                                                                                                                                                                                                                                                                                                                                                                                                                                                                                                                                                                                                                                                                                                                                                                                                                            | Intervention                                                                                                                                                                                                                                                                                                                                                                                                                                                                                                         | Outcome (change from baseline at study end)                                                                                                                                                                                                                                                                                                                                                                                                                                                                                                                                                                                                                                                                                                                                                                                                                                                                                                                            |  |                |   |            |             |  |            |            |              |  |              |             |   |            |    |    |  |            |     |     |                              |  |                     |   |            |            |  |            |            |             |
|-----------------------------------------------------------------------------------------------------------------------------------------|-------------------------------------------------------------------------------------------------------------------------------------------------------------------------------------------------------------------------------------------------------------------------------------------------------------------------------------------------------------------------------------------------------------------------------------------------------------------------------------------------------------------------------------------------------------------------------------------------------------------------------------------------------------------------------------------------------------------------------------------------------------------------------------------------------------------------------------------------------------------------------------------------------------------------------------------------------------------------------------------------------------------------------------------------------------------------------------------------------------------------------------------------------------------------------------------------------------------------------------------------------------------------------------------------------------------------------------------------------------------------------------------------------------------------------------------------------------------------------------------------------------------------------------------------------------------------------------------------------------------------------------------------------------------------------------------------------------------------------------------------------------------------------------------------------------|----------------------------------------------------------------------------------------------------------------------------------------------------------------------------------------------------------------------------------------------------------------------------------------------------------------------------------------------------------------------------------------------------------------------------------------------------------------------------------------------------------------------|------------------------------------------------------------------------------------------------------------------------------------------------------------------------------------------------------------------------------------------------------------------------------------------------------------------------------------------------------------------------------------------------------------------------------------------------------------------------------------------------------------------------------------------------------------------------------------------------------------------------------------------------------------------------------------------------------------------------------------------------------------------------------------------------------------------------------------------------------------------------------------------------------------------------------------------------------------------------|--|----------------|---|------------|-------------|--|------------|------------|--------------|--|--------------|-------------|---|------------|----|----|--|------------|-----|-----|------------------------------|--|---------------------|---|------------|------------|--|------------|------------|-------------|
| <b>BOLT Study (Michaelides 2010/ Rajendram 2012)</b><br>[23,52,84]<br>UK<br><br><b>Design:</b> 2-arm RCT<br><b>Follow-up:</b> 12 months | <p><b>N:</b> 80 eyes of 80 patients</p> <p><b>Inclusion criteria:</b> ≥18 years, type 1 or 2 DM, BCVA in the study eye 35 to 69 ETDRS letters at 4 m (≥6/60 or ≤6/12), center-involving clinically significant DMO with CMT ≥270 μm; media clarity, papillary dilation and cooperation sufficient for adequate fundus imaging; a least 1 prior macular laser therapy; IOP &lt;30 mmHg; fellow eye BCVA ≥3/60; fellow eye received no anti-VEGF in past 3 months and no expectation of such therapy</p> <p><b>Exclusion criteria:</b> (ocular for study eye) macular ischemia, macular oedema due to causes other than DMO, coexistent ocular disease affecting VA or DMO, any treatment for DMO in prior 3 months, PRP within 3 months prior to randomization or anticipated, PDR, HbA1c &gt;11.0%, medical history of chronic renal failure; any thromboembolic event within 6 months prior to randomization, unstable angina, evidence of active ischemia on ECG; major surgery within 28 days of randomization or planned; participation in an investigational drug trial; systemic anti-VEGF or pro-VEGF treatment within 3 months of enrollment; pregnancy, lactation; intraocular surgery within 3 months of randomization; aphakia; uncontrolled glaucoma; significant external ocular disease</p> <p><b>Age:</b> 64.2 SD8.8 years<br/> <b>Sex:</b> 31% female<br/> <b>Diabetes type:</b> 90% type 2 DM, 10% type 1 DM<br/> <b>HbA1c:</b> 7.5 to 7.6 SD1.2 to 1.4%<br/> <b>Baseline VA:</b> ETDRS letter score 54.6 to 55.7 SD8.6 to 9.7<br/> <b>Baseline CMT:</b> 481 to 507 SD121 to 145 μm<br/> <b>Comorbidities:</b> 19% mild NPDR (level 35), 46% moderate NPDR (level 43), 19% moderately severe NPDR (level 47), 13% severe NPDR (level 53), 3% moderate PDR (level 65), 79 to 88% phakic</p> | <p><b>Group 1 (MLT, n=38 eyes):</b> modified ETDRS macular laser therapy; reviewed every 4 months up to 52 weeks; retreatment performed if clinically indicated by ETDRS guidelines (median 4 laser treatments)</p> <p><b>Group 2 (IVB, n=42 eyes):</b> 1.25 mg (0.05 ml) IV bevacizumab at baseline, 6 and 12 weeks; subsequent IVB injections (up to 52 weeks) guided by an OCT-based retreatment protocol (median 13 injections)</p> <p><b>Laser Modified ETDRS protocol, retreatment by ETDRS guidelines</b></p> | <p><b>At 24 months</b></p> <p><b>BCVA (ETDRS):</b></p> <table border="1"> <thead> <tr> <th></th> <th>BCVA.mean (SD)</th> <th>p</th> </tr> </thead> <tbody> <tr> <td><i>MLT</i></td> <td>-0.5 (10.6)</td> <td></td> </tr> <tr> <td><i>IVB</i></td> <td>+8.6 (9.1)</td> <td>0.005 vs MLT</td> </tr> </tbody> </table> <p><b>BCVA gain categories (letters)</b></p> <table border="1"> <thead> <tr> <th></th> <th>gaining ≥10:</th> <th>losing &gt;15:</th> <th>p</th> </tr> </thead> <tbody> <tr> <td><i>MLT</i></td> <td>7%</td> <td>4%</td> <td></td> </tr> <tr> <td><i>IVB</i></td> <td>49%</td> <td>32%</td> <td>0.001 vs MLT<br/>0.004 vs MLT</td> </tr> </tbody> </table> <p><b>CMT (OCT):</b></p> <table border="1"> <thead> <tr> <th></th> <th>CMT (μm, quartiles)</th> <th>p</th> </tr> </thead> <tbody> <tr> <td><i>MLT</i></td> <td>-118 SD171</td> <td></td> </tr> <tr> <td><i>IVB</i></td> <td>-146 SD122</td> <td>0.62 vs MLT</td> </tr> </tbody> </table> |  | BCVA.mean (SD) | p | <i>MLT</i> | -0.5 (10.6) |  | <i>IVB</i> | +8.6 (9.1) | 0.005 vs MLT |  | gaining ≥10: | losing >15: | p | <i>MLT</i> | 7% | 4% |  | <i>IVB</i> | 49% | 32% | 0.001 vs MLT<br>0.004 vs MLT |  | CMT (μm, quartiles) | p | <i>MLT</i> | -118 SD171 |  | <i>IVB</i> | -146 SD122 | 0.62 vs MLT |
|                                                                                                                                         | BCVA.mean (SD)                                                                                                                                                                                                                                                                                                                                                                                                                                                                                                                                                                                                                                                                                                                                                                                                                                                                                                                                                                                                                                                                                                                                                                                                                                                                                                                                                                                                                                                                                                                                                                                                                                                                                                                                                                                              | p                                                                                                                                                                                                                                                                                                                                                                                                                                                                                                                    |                                                                                                                                                                                                                                                                                                                                                                                                                                                                                                                                                                                                                                                                                                                                                                                                                                                                                                                                                                        |  |                |   |            |             |  |            |            |              |  |              |             |   |            |    |    |  |            |     |     |                              |  |                     |   |            |            |  |            |            |             |
| <i>MLT</i>                                                                                                                              | -0.5 (10.6)                                                                                                                                                                                                                                                                                                                                                                                                                                                                                                                                                                                                                                                                                                                                                                                                                                                                                                                                                                                                                                                                                                                                                                                                                                                                                                                                                                                                                                                                                                                                                                                                                                                                                                                                                                                                 |                                                                                                                                                                                                                                                                                                                                                                                                                                                                                                                      |                                                                                                                                                                                                                                                                                                                                                                                                                                                                                                                                                                                                                                                                                                                                                                                                                                                                                                                                                                        |  |                |   |            |             |  |            |            |              |  |              |             |   |            |    |    |  |            |     |     |                              |  |                     |   |            |            |  |            |            |             |
| <i>IVB</i>                                                                                                                              | +8.6 (9.1)                                                                                                                                                                                                                                                                                                                                                                                                                                                                                                                                                                                                                                                                                                                                                                                                                                                                                                                                                                                                                                                                                                                                                                                                                                                                                                                                                                                                                                                                                                                                                                                                                                                                                                                                                                                                  | 0.005 vs MLT                                                                                                                                                                                                                                                                                                                                                                                                                                                                                                         |                                                                                                                                                                                                                                                                                                                                                                                                                                                                                                                                                                                                                                                                                                                                                                                                                                                                                                                                                                        |  |                |   |            |             |  |            |            |              |  |              |             |   |            |    |    |  |            |     |     |                              |  |                     |   |            |            |  |            |            |             |
|                                                                                                                                         | gaining ≥10:                                                                                                                                                                                                                                                                                                                                                                                                                                                                                                                                                                                                                                                                                                                                                                                                                                                                                                                                                                                                                                                                                                                                                                                                                                                                                                                                                                                                                                                                                                                                                                                                                                                                                                                                                                                                | losing >15:                                                                                                                                                                                                                                                                                                                                                                                                                                                                                                          | p                                                                                                                                                                                                                                                                                                                                                                                                                                                                                                                                                                                                                                                                                                                                                                                                                                                                                                                                                                      |  |                |   |            |             |  |            |            |              |  |              |             |   |            |    |    |  |            |     |     |                              |  |                     |   |            |            |  |            |            |             |
| <i>MLT</i>                                                                                                                              | 7%                                                                                                                                                                                                                                                                                                                                                                                                                                                                                                                                                                                                                                                                                                                                                                                                                                                                                                                                                                                                                                                                                                                                                                                                                                                                                                                                                                                                                                                                                                                                                                                                                                                                                                                                                                                                          | 4%                                                                                                                                                                                                                                                                                                                                                                                                                                                                                                                   |                                                                                                                                                                                                                                                                                                                                                                                                                                                                                                                                                                                                                                                                                                                                                                                                                                                                                                                                                                        |  |                |   |            |             |  |            |            |              |  |              |             |   |            |    |    |  |            |     |     |                              |  |                     |   |            |            |  |            |            |             |
| <i>IVB</i>                                                                                                                              | 49%                                                                                                                                                                                                                                                                                                                                                                                                                                                                                                                                                                                                                                                                                                                                                                                                                                                                                                                                                                                                                                                                                                                                                                                                                                                                                                                                                                                                                                                                                                                                                                                                                                                                                                                                                                                                         | 32%                                                                                                                                                                                                                                                                                                                                                                                                                                                                                                                  | 0.001 vs MLT<br>0.004 vs MLT                                                                                                                                                                                                                                                                                                                                                                                                                                                                                                                                                                                                                                                                                                                                                                                                                                                                                                                                           |  |                |   |            |             |  |            |            |              |  |              |             |   |            |    |    |  |            |     |     |                              |  |                     |   |            |            |  |            |            |             |
|                                                                                                                                         | CMT (μm, quartiles)                                                                                                                                                                                                                                                                                                                                                                                                                                                                                                                                                                                                                                                                                                                                                                                                                                                                                                                                                                                                                                                                                                                                                                                                                                                                                                                                                                                                                                                                                                                                                                                                                                                                                                                                                                                         | p                                                                                                                                                                                                                                                                                                                                                                                                                                                                                                                    |                                                                                                                                                                                                                                                                                                                                                                                                                                                                                                                                                                                                                                                                                                                                                                                                                                                                                                                                                                        |  |                |   |            |             |  |            |            |              |  |              |             |   |            |    |    |  |            |     |     |                              |  |                     |   |            |            |  |            |            |             |
| <i>MLT</i>                                                                                                                              | -118 SD171                                                                                                                                                                                                                                                                                                                                                                                                                                                                                                                                                                                                                                                                                                                                                                                                                                                                                                                                                                                                                                                                                                                                                                                                                                                                                                                                                                                                                                                                                                                                                                                                                                                                                                                                                                                                  |                                                                                                                                                                                                                                                                                                                                                                                                                                                                                                                      |                                                                                                                                                                                                                                                                                                                                                                                                                                                                                                                                                                                                                                                                                                                                                                                                                                                                                                                                                                        |  |                |   |            |             |  |            |            |              |  |              |             |   |            |    |    |  |            |     |     |                              |  |                     |   |            |            |  |            |            |             |
| <i>IVB</i>                                                                                                                              | -146 SD122                                                                                                                                                                                                                                                                                                                                                                                                                                                                                                                                                                                                                                                                                                                                                                                                                                                                                                                                                                                                                                                                                                                                                                                                                                                                                                                                                                                                                                                                                                                                                                                                                                                                                                                                                                                                  | 0.62 vs MLT                                                                                                                                                                                                                                                                                                                                                                                                                                                                                                          |                                                                                                                                                                                                                                                                                                                                                                                                                                                                                                                                                                                                                                                                                                                                                                                                                                                                                                                                                                        |  |                |   |            |             |  |            |            |              |  |              |             |   |            |    |    |  |            |     |     |                              |  |                     |   |            |            |  |            |            |             |

| Study                                                                                                          | Participants and baseline values                                                                                                                                                                                                                                                                                                                                                                                                                                                                                                                                                                                                                                                                                                                                                                                                                                                                                                                                                                                                                                                                                                                                                            | Intervention                                                                                                                                                                                                                                                                                                                                                                      | Outcome (change from baseline at study end)                                                                                                                                                                                                                                                                                                                                                                                                                                                                                                                                                                                                                                                                                                                                                                                                                                                                                                                                                                                                                                                                                                             |  |               |   |                |                               |                                 |                |                               |                     |  |                       |   |                |     |                                 |                |     |                     |
|----------------------------------------------------------------------------------------------------------------|---------------------------------------------------------------------------------------------------------------------------------------------------------------------------------------------------------------------------------------------------------------------------------------------------------------------------------------------------------------------------------------------------------------------------------------------------------------------------------------------------------------------------------------------------------------------------------------------------------------------------------------------------------------------------------------------------------------------------------------------------------------------------------------------------------------------------------------------------------------------------------------------------------------------------------------------------------------------------------------------------------------------------------------------------------------------------------------------------------------------------------------------------------------------------------------------|-----------------------------------------------------------------------------------------------------------------------------------------------------------------------------------------------------------------------------------------------------------------------------------------------------------------------------------------------------------------------------------|---------------------------------------------------------------------------------------------------------------------------------------------------------------------------------------------------------------------------------------------------------------------------------------------------------------------------------------------------------------------------------------------------------------------------------------------------------------------------------------------------------------------------------------------------------------------------------------------------------------------------------------------------------------------------------------------------------------------------------------------------------------------------------------------------------------------------------------------------------------------------------------------------------------------------------------------------------------------------------------------------------------------------------------------------------------------------------------------------------------------------------------------------------|--|---------------|---|----------------|-------------------------------|---------------------------------|----------------|-------------------------------|---------------------|--|-----------------------|---|----------------|-----|---------------------------------|----------------|-----|---------------------|
| <p><b>Lam 2009</b>[35]<br/><b>Hong Kong</b></p> <p><b>Design:</b> 2-arm RCT<br/><b>Follow-up:</b> 6 months</p> | <p><b>N:</b> 52 eyes of 52 patients<br/><b>Inclusion criteria:</b> <math>\geq 18</math> years, type 1 or 2 DM, clinically significant DMO (slit-lamp biomicroscopy, ETDRS criteria; leakage confirmed by fluorescein angiography, CMT <math>\geq 250</math> <math>\mu\text{m}</math> on OCT), BCVA <math>\geq 1.3</math> ETDRS logMAR units; only patients with diffuse DMO recruited<br/><b>Exclusion criteria:</b> macular oedema due to reasons other than diabetes, significant media opacities, macular ischemia of <math>\geq 1</math> disk area, vitreomacular traction, PDR, aphakia, glaucoma or ocular hypertension, previous anti-VEGF treatment, intraocular surgery except uncomplicated cataract extraction (but <math>&gt; 6</math> months prior), focal DMO, any laser procedure within previous 4 months, subtenon or intravitreal triamcinolone injection within 6 months, pregnancy.<br/><b>Age:</b> 65.3 SD8.9 years<br/><b>Sex:</b> 46.2% female<br/><b>Diabetes type:</b> not reported<br/><b>HbA1c:</b> 7.5 SD1.0%<br/><b>Baseline VA:</b> 0.61 SD0.29 logMAR<br/><b>Baseline CMT:</b> 466 SD127 <math>\mu\text{m}</math><br/><b>Comorbidities:</b> not reported</p> | <p><b>Group 1 (IVB1.25, n=26 eyes):</b> 1.25 mg bevacizumab (0.05 ml)<br/><b>Group 2 (IVB2.5, n=26 eyes):</b> 2.5 mg bevacizumab (0.1 ml)<br/><b>Regimen for all groups:</b> 3 monthly IV injections, topical 0.5% levofloxacin 4x/day for up to 2 weeks after each injection</p>                                                                                                 | <p><b>At 6 months</b><br/><b>BCVA (ETDRS chart):</b></p> <table border="1"> <thead> <tr> <th></th> <th>BCVA (logMAR)</th> <th>p</th> </tr> </thead> <tbody> <tr> <td><b>IVB1.25</b></td> <td>0.11 SD0.31<br/>[+5.5 letters]</td> <td>0.018 vs baseline, NS vs IVB2.5</td> </tr> <tr> <td><b>IVB2.5</b></td> <td>0.13 SD0.26<br/>[+6.5 letters]</td> <td>0.003 vs baseline</td> </tr> </tbody> </table> <p><b>CMT (OCT):</b></p> <table border="1"> <thead> <tr> <th></th> <th>CMT (<math>\mu\text{m}</math>)</th> <th>p</th> </tr> </thead> <tbody> <tr> <td><b>IVB1.25</b></td> <td>96</td> <td>0.002 vs baseline, NS vs IVB2.5</td> </tr> <tr> <td><b>IVB2.5</b></td> <td>74</td> <td>0.013 vs baseline</td> </tr> </tbody> </table> <p>Subgroups:</p> <ul style="list-style-type: none"> <li>For patients with previous DMO treatment (mainly laser): no significant reduction in CMT at 6 months (452 <math>\mu\text{m}</math> at baseline to 416 <math>\mu\text{m}</math> at 6 months, <math>p=0.22</math>); no significant improvement in BCVA (0.66 logMAR at baseline to 0.56 logMAR at 6 months [+5 letters], <math>p=0.074</math>)</li> </ul> |  | BCVA (logMAR) | p | <b>IVB1.25</b> | 0.11 SD0.31<br>[+5.5 letters] | 0.018 vs baseline, NS vs IVB2.5 | <b>IVB2.5</b>  | 0.13 SD0.26<br>[+6.5 letters] | 0.003 vs baseline   |  | CMT ( $\mu\text{m}$ ) | p | <b>IVB1.25</b> | 96  | 0.002 vs baseline, NS vs IVB2.5 | <b>IVB2.5</b>  | 74  | 0.013 vs baseline   |
|                                                                                                                | BCVA (logMAR)                                                                                                                                                                                                                                                                                                                                                                                                                                                                                                                                                                                                                                                                                                                                                                                                                                                                                                                                                                                                                                                                                                                                                                               | p                                                                                                                                                                                                                                                                                                                                                                                 |                                                                                                                                                                                                                                                                                                                                                                                                                                                                                                                                                                                                                                                                                                                                                                                                                                                                                                                                                                                                                                                                                                                                                         |  |               |   |                |                               |                                 |                |                               |                     |  |                       |   |                |     |                                 |                |     |                     |
| <b>IVB1.25</b>                                                                                                 | 0.11 SD0.31<br>[+5.5 letters]                                                                                                                                                                                                                                                                                                                                                                                                                                                                                                                                                                                                                                                                                                                                                                                                                                                                                                                                                                                                                                                                                                                                                               | 0.018 vs baseline, NS vs IVB2.5                                                                                                                                                                                                                                                                                                                                                   |                                                                                                                                                                                                                                                                                                                                                                                                                                                                                                                                                                                                                                                                                                                                                                                                                                                                                                                                                                                                                                                                                                                                                         |  |               |   |                |                               |                                 |                |                               |                     |  |                       |   |                |     |                                 |                |     |                     |
| <b>IVB2.5</b>                                                                                                  | 0.13 SD0.26<br>[+6.5 letters]                                                                                                                                                                                                                                                                                                                                                                                                                                                                                                                                                                                                                                                                                                                                                                                                                                                                                                                                                                                                                                                                                                                                                               | 0.003 vs baseline                                                                                                                                                                                                                                                                                                                                                                 |                                                                                                                                                                                                                                                                                                                                                                                                                                                                                                                                                                                                                                                                                                                                                                                                                                                                                                                                                                                                                                                                                                                                                         |  |               |   |                |                               |                                 |                |                               |                     |  |                       |   |                |     |                                 |                |     |                     |
|                                                                                                                | CMT ( $\mu\text{m}$ )                                                                                                                                                                                                                                                                                                                                                                                                                                                                                                                                                                                                                                                                                                                                                                                                                                                                                                                                                                                                                                                                                                                                                                       | p                                                                                                                                                                                                                                                                                                                                                                                 |                                                                                                                                                                                                                                                                                                                                                                                                                                                                                                                                                                                                                                                                                                                                                                                                                                                                                                                                                                                                                                                                                                                                                         |  |               |   |                |                               |                                 |                |                               |                     |  |                       |   |                |     |                                 |                |     |                     |
| <b>IVB1.25</b>                                                                                                 | 96                                                                                                                                                                                                                                                                                                                                                                                                                                                                                                                                                                                                                                                                                                                                                                                                                                                                                                                                                                                                                                                                                                                                                                                          | 0.002 vs baseline, NS vs IVB2.5                                                                                                                                                                                                                                                                                                                                                   |                                                                                                                                                                                                                                                                                                                                                                                                                                                                                                                                                                                                                                                                                                                                                                                                                                                                                                                                                                                                                                                                                                                                                         |  |               |   |                |                               |                                 |                |                               |                     |  |                       |   |                |     |                                 |                |     |                     |
| <b>IVB2.5</b>                                                                                                  | 74                                                                                                                                                                                                                                                                                                                                                                                                                                                                                                                                                                                                                                                                                                                                                                                                                                                                                                                                                                                                                                                                                                                                                                                          | 0.013 vs baseline                                                                                                                                                                                                                                                                                                                                                                 |                                                                                                                                                                                                                                                                                                                                                                                                                                                                                                                                                                                                                                                                                                                                                                                                                                                                                                                                                                                                                                                                                                                                                         |  |               |   |                |                               |                                 |                |                               |                     |  |                       |   |                |     |                                 |                |     |                     |
| <p><b>Faghihi 2010</b>[53]<br/><b>Iran</b></p> <p><b>Design:</b> 2-arm RCT<br/><b>Follow-up:</b> 6 months</p>  | <p><b>N:</b> 80 eyes of 40 patients<br/><b>Inclusion criteria:</b> Bilateral non-tractional CSME, 10/10 <math>&gt; V.A \geq 1/10</math>, Controlled blood pressure.<br/><b>Exclusion criteria:</b> Advanced or advanced active PDR, Significant cataract, Glaucoma, History of recent vascular accident (e.g. MI, CVA), Previous treatment of CSME or PDR, or pharmacotherapy for CSME, macular ischemia and uncontrolled hypertension.<br/><b>Age:</b> 57.7<math>\pm</math>8 years.<br/><b>Sex:</b> 27.5% females<br/><b>Diabetes type:</b> NR<br/><b>HbA1c:</b> 8.42<math>\pm</math>1.82 g/dl<br/><b>Baseline VA:</b> 0.326 to 0.409 (SD 0.279 to 0.332)<br/><b>Baseline CMT:</b> 277 <math>\mu\text{m}</math> to 287 <math>\mu\text{m}</math> (SD 78 to 98)<br/><b>Comorbidities:</b> not reported</p>                                                                                                                                                                                                                                                                                                                                                                                   | <p><b>Group 1 (IVB, n= 40 eyes):</b> 1.25mg bevacizumab<br/><b>Group 2 (IVB+MPC, n= 40 eyes):</b> 1.25mg bevacizumab<br/><b>Regimen for all groups:</b> Eyes examined every two months and if evidence of CSME IVB was injected. mean of the number of IVB injections in IVB group and IVB+MPC group were 2.23<math>\pm</math>1.24 and 2.49<math>\pm</math>1.09 respectively.</p> | <p><b>At 6 months</b><br/><b>Mean change in BCVA (ETDRS chart):</b></p> <table border="1"> <thead> <tr> <th></th> <th>BCVA (logMAR)</th> <th>p</th> </tr> </thead> <tbody> <tr> <td><b>IVB</b></td> <td>0.138</td> <td><math>&lt;0.05</math> vs baseline</td> </tr> <tr> <td><b>IVB+MPC</b></td> <td>0.179</td> <td><math>&lt;0.05</math> vs baseline</td> </tr> </tbody> </table> <ul style="list-style-type: none"> <li>no statistically significant difference between the two groups</li> </ul> <p><b>CMT (OCT):</b></p> <table border="1"> <thead> <tr> <th></th> <th>CMT (<math>\mu\text{m}</math>)</th> <th>p</th> </tr> </thead> <tbody> <tr> <td><b>IVB</b></td> <td>-39</td> <td><math>&lt;0.05</math> vs baseline</td> </tr> <tr> <td><b>IVB+MPC</b></td> <td>-39</td> <td><math>&lt;0.05</math> vs baseline</td> </tr> </tbody> </table> <ul style="list-style-type: none"> <li>no statistically significant difference between the two groups</li> </ul>                                                                                                                                                                                   |  | BCVA (logMAR) | p | <b>IVB</b>     | 0.138                         | $<0.05$ vs baseline             | <b>IVB+MPC</b> | 0.179                         | $<0.05$ vs baseline |  | CMT ( $\mu\text{m}$ ) | p | <b>IVB</b>     | -39 | $<0.05$ vs baseline             | <b>IVB+MPC</b> | -39 | $<0.05$ vs baseline |
|                                                                                                                | BCVA (logMAR)                                                                                                                                                                                                                                                                                                                                                                                                                                                                                                                                                                                                                                                                                                                                                                                                                                                                                                                                                                                                                                                                                                                                                                               | p                                                                                                                                                                                                                                                                                                                                                                                 |                                                                                                                                                                                                                                                                                                                                                                                                                                                                                                                                                                                                                                                                                                                                                                                                                                                                                                                                                                                                                                                                                                                                                         |  |               |   |                |                               |                                 |                |                               |                     |  |                       |   |                |     |                                 |                |     |                     |
| <b>IVB</b>                                                                                                     | 0.138                                                                                                                                                                                                                                                                                                                                                                                                                                                                                                                                                                                                                                                                                                                                                                                                                                                                                                                                                                                                                                                                                                                                                                                       | $<0.05$ vs baseline                                                                                                                                                                                                                                                                                                                                                               |                                                                                                                                                                                                                                                                                                                                                                                                                                                                                                                                                                                                                                                                                                                                                                                                                                                                                                                                                                                                                                                                                                                                                         |  |               |   |                |                               |                                 |                |                               |                     |  |                       |   |                |     |                                 |                |     |                     |
| <b>IVB+MPC</b>                                                                                                 | 0.179                                                                                                                                                                                                                                                                                                                                                                                                                                                                                                                                                                                                                                                                                                                                                                                                                                                                                                                                                                                                                                                                                                                                                                                       | $<0.05$ vs baseline                                                                                                                                                                                                                                                                                                                                                               |                                                                                                                                                                                                                                                                                                                                                                                                                                                                                                                                                                                                                                                                                                                                                                                                                                                                                                                                                                                                                                                                                                                                                         |  |               |   |                |                               |                                 |                |                               |                     |  |                       |   |                |     |                                 |                |     |                     |
|                                                                                                                | CMT ( $\mu\text{m}$ )                                                                                                                                                                                                                                                                                                                                                                                                                                                                                                                                                                                                                                                                                                                                                                                                                                                                                                                                                                                                                                                                                                                                                                       | p                                                                                                                                                                                                                                                                                                                                                                                 |                                                                                                                                                                                                                                                                                                                                                                                                                                                                                                                                                                                                                                                                                                                                                                                                                                                                                                                                                                                                                                                                                                                                                         |  |               |   |                |                               |                                 |                |                               |                     |  |                       |   |                |     |                                 |                |     |                     |
| <b>IVB</b>                                                                                                     | -39                                                                                                                                                                                                                                                                                                                                                                                                                                                                                                                                                                                                                                                                                                                                                                                                                                                                                                                                                                                                                                                                                                                                                                                         | $<0.05$ vs baseline                                                                                                                                                                                                                                                                                                                                                               |                                                                                                                                                                                                                                                                                                                                                                                                                                                                                                                                                                                                                                                                                                                                                                                                                                                                                                                                                                                                                                                                                                                                                         |  |               |   |                |                               |                                 |                |                               |                     |  |                       |   |                |     |                                 |                |     |                     |
| <b>IVB+MPC</b>                                                                                                 | -39                                                                                                                                                                                                                                                                                                                                                                                                                                                                                                                                                                                                                                                                                                                                                                                                                                                                                                                                                                                                                                                                                                                                                                                         | $<0.05$ vs baseline                                                                                                                                                                                                                                                                                                                                                               |                                                                                                                                                                                                                                                                                                                                                                                                                                                                                                                                                                                                                                                                                                                                                                                                                                                                                                                                                                                                                                                                                                                                                         |  |               |   |                |                               |                                 |                |                               |                     |  |                       |   |                |     |                                 |                |     |                     |

Abbreviations: See table 2

Table 4: Pegaptanib and aflibercept studies

| Study                                                                                                                         | Participants and baseline values                                                                                                                                                                                                                                                                                                                                                                                                                                                                                                                                                                                                                                                                                                                                                                                                                                                                                                                                                                                                                                                                                                                                                                                                                                                                                                                                                                                                                                                                                                                                                                                            | Intervention                                                                                                                                                                                                                                                                                                                                                                                                                                                                                                                                                                                                                                                                                                                                                                                                      | Outcome (change from baseline at study end)                                                                                                                                                                                                                                                                                                                                                                                                                                                                                                                                                                                                                                                                                                                                                                                                                                                                                                                                                                                                                                                                                                                                                                                                                                                                                                           |  |                |   |               |      |            |             |      |           |             |      |         |          |      |  |               |     |            |             |     |  |             |     |  |          |     |  |  |                  |   |               |                         |           |             |                        |         |             |                       |         |          |      |  |
|-------------------------------------------------------------------------------------------------------------------------------|-----------------------------------------------------------------------------------------------------------------------------------------------------------------------------------------------------------------------------------------------------------------------------------------------------------------------------------------------------------------------------------------------------------------------------------------------------------------------------------------------------------------------------------------------------------------------------------------------------------------------------------------------------------------------------------------------------------------------------------------------------------------------------------------------------------------------------------------------------------------------------------------------------------------------------------------------------------------------------------------------------------------------------------------------------------------------------------------------------------------------------------------------------------------------------------------------------------------------------------------------------------------------------------------------------------------------------------------------------------------------------------------------------------------------------------------------------------------------------------------------------------------------------------------------------------------------------------------------------------------------------|-------------------------------------------------------------------------------------------------------------------------------------------------------------------------------------------------------------------------------------------------------------------------------------------------------------------------------------------------------------------------------------------------------------------------------------------------------------------------------------------------------------------------------------------------------------------------------------------------------------------------------------------------------------------------------------------------------------------------------------------------------------------------------------------------------------------|-------------------------------------------------------------------------------------------------------------------------------------------------------------------------------------------------------------------------------------------------------------------------------------------------------------------------------------------------------------------------------------------------------------------------------------------------------------------------------------------------------------------------------------------------------------------------------------------------------------------------------------------------------------------------------------------------------------------------------------------------------------------------------------------------------------------------------------------------------------------------------------------------------------------------------------------------------------------------------------------------------------------------------------------------------------------------------------------------------------------------------------------------------------------------------------------------------------------------------------------------------------------------------------------------------------------------------------------------------|--|----------------|---|---------------|------|------------|-------------|------|-----------|-------------|------|---------|----------|------|--|---------------|-----|------------|-------------|-----|--|-------------|-----|--|----------|-----|--|--|------------------|---|---------------|-------------------------|-----------|-------------|------------------------|---------|-------------|-----------------------|---------|----------|------|--|
| <i>Pegaptanib</i>                                                                                                             |                                                                                                                                                                                                                                                                                                                                                                                                                                                                                                                                                                                                                                                                                                                                                                                                                                                                                                                                                                                                                                                                                                                                                                                                                                                                                                                                                                                                                                                                                                                                                                                                                             |                                                                                                                                                                                                                                                                                                                                                                                                                                                                                                                                                                                                                                                                                                                                                                                                                   |                                                                                                                                                                                                                                                                                                                                                                                                                                                                                                                                                                                                                                                                                                                                                                                                                                                                                                                                                                                                                                                                                                                                                                                                                                                                                                                                                       |  |                |   |               |      |            |             |      |           |             |      |         |          |      |  |               |     |            |             |     |  |             |     |  |          |     |  |  |                  |   |               |                         |           |             |                        |         |             |                       |         |          |      |  |
| <b>Cunningham 2005 / Adamis 2006</b><br>[39,57]<br>USA<br><br><b>Design:</b> 4-arm phase II RCT<br><b>Follow-up:</b> 36 weeks | <b>N:</b> 172 eyes of 172 patients<br><b>Inclusion criteria:</b> ≥18 years, type 1 or 2 DM, DMO involving the center of the macula with corresponding leakage from microaneurysms, retinal telangiectasis, or both; clear ocular media, BCVA letter scores between 68 and 25 in the study eye and at least 35 in the fellow eye; IOP ≤23 mmHg, focal photocoagulation could be safely deferred for 16 weeks; no ECG abnormalities, no major serological abnormalities<br><b>Exclusion criteria:</b> history of panretinal or focal photocoagulation; neodymium:yttrium–aluminum–garnet laser or peripheral retinal cryoablation in previous 6 months; any ocular abnormality interfering with VA assessment or fundus photography; vitreoretinal traction; vitreous incarceration; retinal vein occlusion involving the macula; atrophy/scarring/fibrosis or hard exudates involving the center of the macula; history of intraocular surgery within previous 12 months, myopia of ≥8 diopters, axial length of ≥25mm, likelihood of requiring panretinal photocoagulation within following 9 months; cataract surgery within 12 months; active ocular or periocular infection; previous therapeutic radiation to the eye, head, or neck;; known serious allergies to fluorescein dye; HbA1c ≥13%, pregnancy<br><b>Age:</b> 61.3 to 64.0 SD9.3 to 10.1 years<br><b>Sex:</b> 45 to 55% female<br><b>Diabetes type:</b> 5 to 10% IDDM<br><b>HbA1c:</b> 7.1 to 7.7 SD1.2 to 1.6<br><b>Baseline VA:</b> letter score 55.0 to 57.1 SD9.1 to 11.5<br><b>Baseline CMT:</b> 423.2 to 476.0 μm<br><b>Comorbidities:</b> not reported | <b>Group 1 (IVP0.3, n=44 eyes):</b> 0.3 mg IV pegaptanib (90 μl) (median 5 injections (range 1 to 6))<br><b>Group 2 (IVP1, n=44 eyes):</b> 1 mg IV pegaptanib (90 μl) (median 6 injections (range 3 to 6))<br><b>Group 3 (IVP3, n=42 eyes):</b> 3 mg IV pegaptanib (90 μl) (median 6 injections (range 1 to 6))<br><b>Group 4 (C, n=42 eyes):</b> sham injection (median 5 injections (range 1 to 6))<br><b>Regimen for all groups:</b> injections at baseline, week 6 and week 12; thereafter, additional injections administered every 6 weeks at the discretion of the investigators if judged indicated (maximum of 6 injections up to week 30); laser photocoagulation allowed after week 13 if judged indicated by the study-masked ophthalmologist (25% for IVP0.3, 30% for IVP1, 40% for IVP3, 48% for C) | <b>At 36 weeks BCVA:</b><br><table border="1"><thead><tr><th></th><th>BCVA (letters)</th><th>p</th></tr></thead><tbody><tr><td><i>IVP0.3</i></td><td>+4.7</td><td>0.04 vs C</td></tr><tr><td><i>IVP1</i></td><td>+4.7</td><td>0.05 vs C</td></tr><tr><td><i>IVP3</i></td><td>+1.1</td><td>NS vs C</td></tr><tr><td><i>C</i></td><td>-0.4</td><td></td></tr></tbody></table><br><b>plus ≥10 letters</b><br><table border="1"><tbody><tr><td><i>IVP0.3</i></td><td>34%</td><td>0.003 vs C</td></tr><tr><td><i>IVP1</i></td><td>30%</td><td></td></tr><tr><td><i>IVP3</i></td><td>14%</td><td></td></tr><tr><td><i>C</i></td><td>10%</td><td></td></tr></tbody></table><br><b>CMT (OCT):</b><br><table border="1"><thead><tr><th></th><th>CMT (μm, 95% CI)</th><th>p</th></tr></thead><tbody><tr><td><i>IVP0.3</i></td><td>-68.0 (-118.9 to -9.88)</td><td>0.02 vs C</td></tr><tr><td><i>IVP1</i></td><td>-22.7 (-76.9 to +33.8)</td><td>NS vs C</td></tr><tr><td><i>IVP3</i></td><td>-5.3 (-63.0 to +49.5)</td><td>NS vs C</td></tr><tr><td><i>C</i></td><td>+3.7</td><td></td></tr></tbody></table><br>Subgroups: <ul style="list-style-type: none"><li>of 16 participants with retinal neovascularization at baseline, 8 of 13 (62%) in the pegaptanib groups and 0 of 3 in the sham group had regression of neovascularization at 36 weeks</li></ul> |  | BCVA (letters) | p | <i>IVP0.3</i> | +4.7 | 0.04 vs C  | <i>IVP1</i> | +4.7 | 0.05 vs C | <i>IVP3</i> | +1.1 | NS vs C | <i>C</i> | -0.4 |  | <i>IVP0.3</i> | 34% | 0.003 vs C | <i>IVP1</i> | 30% |  | <i>IVP3</i> | 14% |  | <i>C</i> | 10% |  |  | CMT (μm, 95% CI) | p | <i>IVP0.3</i> | -68.0 (-118.9 to -9.88) | 0.02 vs C | <i>IVP1</i> | -22.7 (-76.9 to +33.8) | NS vs C | <i>IVP3</i> | -5.3 (-63.0 to +49.5) | NS vs C | <i>C</i> | +3.7 |  |
|                                                                                                                               | BCVA (letters)                                                                                                                                                                                                                                                                                                                                                                                                                                                                                                                                                                                                                                                                                                                                                                                                                                                                                                                                                                                                                                                                                                                                                                                                                                                                                                                                                                                                                                                                                                                                                                                                              | p                                                                                                                                                                                                                                                                                                                                                                                                                                                                                                                                                                                                                                                                                                                                                                                                                 |                                                                                                                                                                                                                                                                                                                                                                                                                                                                                                                                                                                                                                                                                                                                                                                                                                                                                                                                                                                                                                                                                                                                                                                                                                                                                                                                                       |  |                |   |               |      |            |             |      |           |             |      |         |          |      |  |               |     |            |             |     |  |             |     |  |          |     |  |  |                  |   |               |                         |           |             |                        |         |             |                       |         |          |      |  |
| <i>IVP0.3</i>                                                                                                                 | +4.7                                                                                                                                                                                                                                                                                                                                                                                                                                                                                                                                                                                                                                                                                                                                                                                                                                                                                                                                                                                                                                                                                                                                                                                                                                                                                                                                                                                                                                                                                                                                                                                                                        | 0.04 vs C                                                                                                                                                                                                                                                                                                                                                                                                                                                                                                                                                                                                                                                                                                                                                                                                         |                                                                                                                                                                                                                                                                                                                                                                                                                                                                                                                                                                                                                                                                                                                                                                                                                                                                                                                                                                                                                                                                                                                                                                                                                                                                                                                                                       |  |                |   |               |      |            |             |      |           |             |      |         |          |      |  |               |     |            |             |     |  |             |     |  |          |     |  |  |                  |   |               |                         |           |             |                        |         |             |                       |         |          |      |  |
| <i>IVP1</i>                                                                                                                   | +4.7                                                                                                                                                                                                                                                                                                                                                                                                                                                                                                                                                                                                                                                                                                                                                                                                                                                                                                                                                                                                                                                                                                                                                                                                                                                                                                                                                                                                                                                                                                                                                                                                                        | 0.05 vs C                                                                                                                                                                                                                                                                                                                                                                                                                                                                                                                                                                                                                                                                                                                                                                                                         |                                                                                                                                                                                                                                                                                                                                                                                                                                                                                                                                                                                                                                                                                                                                                                                                                                                                                                                                                                                                                                                                                                                                                                                                                                                                                                                                                       |  |                |   |               |      |            |             |      |           |             |      |         |          |      |  |               |     |            |             |     |  |             |     |  |          |     |  |  |                  |   |               |                         |           |             |                        |         |             |                       |         |          |      |  |
| <i>IVP3</i>                                                                                                                   | +1.1                                                                                                                                                                                                                                                                                                                                                                                                                                                                                                                                                                                                                                                                                                                                                                                                                                                                                                                                                                                                                                                                                                                                                                                                                                                                                                                                                                                                                                                                                                                                                                                                                        | NS vs C                                                                                                                                                                                                                                                                                                                                                                                                                                                                                                                                                                                                                                                                                                                                                                                                           |                                                                                                                                                                                                                                                                                                                                                                                                                                                                                                                                                                                                                                                                                                                                                                                                                                                                                                                                                                                                                                                                                                                                                                                                                                                                                                                                                       |  |                |   |               |      |            |             |      |           |             |      |         |          |      |  |               |     |            |             |     |  |             |     |  |          |     |  |  |                  |   |               |                         |           |             |                        |         |             |                       |         |          |      |  |
| <i>C</i>                                                                                                                      | -0.4                                                                                                                                                                                                                                                                                                                                                                                                                                                                                                                                                                                                                                                                                                                                                                                                                                                                                                                                                                                                                                                                                                                                                                                                                                                                                                                                                                                                                                                                                                                                                                                                                        |                                                                                                                                                                                                                                                                                                                                                                                                                                                                                                                                                                                                                                                                                                                                                                                                                   |                                                                                                                                                                                                                                                                                                                                                                                                                                                                                                                                                                                                                                                                                                                                                                                                                                                                                                                                                                                                                                                                                                                                                                                                                                                                                                                                                       |  |                |   |               |      |            |             |      |           |             |      |         |          |      |  |               |     |            |             |     |  |             |     |  |          |     |  |  |                  |   |               |                         |           |             |                        |         |             |                       |         |          |      |  |
| <i>IVP0.3</i>                                                                                                                 | 34%                                                                                                                                                                                                                                                                                                                                                                                                                                                                                                                                                                                                                                                                                                                                                                                                                                                                                                                                                                                                                                                                                                                                                                                                                                                                                                                                                                                                                                                                                                                                                                                                                         | 0.003 vs C                                                                                                                                                                                                                                                                                                                                                                                                                                                                                                                                                                                                                                                                                                                                                                                                        |                                                                                                                                                                                                                                                                                                                                                                                                                                                                                                                                                                                                                                                                                                                                                                                                                                                                                                                                                                                                                                                                                                                                                                                                                                                                                                                                                       |  |                |   |               |      |            |             |      |           |             |      |         |          |      |  |               |     |            |             |     |  |             |     |  |          |     |  |  |                  |   |               |                         |           |             |                        |         |             |                       |         |          |      |  |
| <i>IVP1</i>                                                                                                                   | 30%                                                                                                                                                                                                                                                                                                                                                                                                                                                                                                                                                                                                                                                                                                                                                                                                                                                                                                                                                                                                                                                                                                                                                                                                                                                                                                                                                                                                                                                                                                                                                                                                                         |                                                                                                                                                                                                                                                                                                                                                                                                                                                                                                                                                                                                                                                                                                                                                                                                                   |                                                                                                                                                                                                                                                                                                                                                                                                                                                                                                                                                                                                                                                                                                                                                                                                                                                                                                                                                                                                                                                                                                                                                                                                                                                                                                                                                       |  |                |   |               |      |            |             |      |           |             |      |         |          |      |  |               |     |            |             |     |  |             |     |  |          |     |  |  |                  |   |               |                         |           |             |                        |         |             |                       |         |          |      |  |
| <i>IVP3</i>                                                                                                                   | 14%                                                                                                                                                                                                                                                                                                                                                                                                                                                                                                                                                                                                                                                                                                                                                                                                                                                                                                                                                                                                                                                                                                                                                                                                                                                                                                                                                                                                                                                                                                                                                                                                                         |                                                                                                                                                                                                                                                                                                                                                                                                                                                                                                                                                                                                                                                                                                                                                                                                                   |                                                                                                                                                                                                                                                                                                                                                                                                                                                                                                                                                                                                                                                                                                                                                                                                                                                                                                                                                                                                                                                                                                                                                                                                                                                                                                                                                       |  |                |   |               |      |            |             |      |           |             |      |         |          |      |  |               |     |            |             |     |  |             |     |  |          |     |  |  |                  |   |               |                         |           |             |                        |         |             |                       |         |          |      |  |
| <i>C</i>                                                                                                                      | 10%                                                                                                                                                                                                                                                                                                                                                                                                                                                                                                                                                                                                                                                                                                                                                                                                                                                                                                                                                                                                                                                                                                                                                                                                                                                                                                                                                                                                                                                                                                                                                                                                                         |                                                                                                                                                                                                                                                                                                                                                                                                                                                                                                                                                                                                                                                                                                                                                                                                                   |                                                                                                                                                                                                                                                                                                                                                                                                                                                                                                                                                                                                                                                                                                                                                                                                                                                                                                                                                                                                                                                                                                                                                                                                                                                                                                                                                       |  |                |   |               |      |            |             |      |           |             |      |         |          |      |  |               |     |            |             |     |  |             |     |  |          |     |  |  |                  |   |               |                         |           |             |                        |         |             |                       |         |          |      |  |
|                                                                                                                               | CMT (μm, 95% CI)                                                                                                                                                                                                                                                                                                                                                                                                                                                                                                                                                                                                                                                                                                                                                                                                                                                                                                                                                                                                                                                                                                                                                                                                                                                                                                                                                                                                                                                                                                                                                                                                            | p                                                                                                                                                                                                                                                                                                                                                                                                                                                                                                                                                                                                                                                                                                                                                                                                                 |                                                                                                                                                                                                                                                                                                                                                                                                                                                                                                                                                                                                                                                                                                                                                                                                                                                                                                                                                                                                                                                                                                                                                                                                                                                                                                                                                       |  |                |   |               |      |            |             |      |           |             |      |         |          |      |  |               |     |            |             |     |  |             |     |  |          |     |  |  |                  |   |               |                         |           |             |                        |         |             |                       |         |          |      |  |
| <i>IVP0.3</i>                                                                                                                 | -68.0 (-118.9 to -9.88)                                                                                                                                                                                                                                                                                                                                                                                                                                                                                                                                                                                                                                                                                                                                                                                                                                                                                                                                                                                                                                                                                                                                                                                                                                                                                                                                                                                                                                                                                                                                                                                                     | 0.02 vs C                                                                                                                                                                                                                                                                                                                                                                                                                                                                                                                                                                                                                                                                                                                                                                                                         |                                                                                                                                                                                                                                                                                                                                                                                                                                                                                                                                                                                                                                                                                                                                                                                                                                                                                                                                                                                                                                                                                                                                                                                                                                                                                                                                                       |  |                |   |               |      |            |             |      |           |             |      |         |          |      |  |               |     |            |             |     |  |             |     |  |          |     |  |  |                  |   |               |                         |           |             |                        |         |             |                       |         |          |      |  |
| <i>IVP1</i>                                                                                                                   | -22.7 (-76.9 to +33.8)                                                                                                                                                                                                                                                                                                                                                                                                                                                                                                                                                                                                                                                                                                                                                                                                                                                                                                                                                                                                                                                                                                                                                                                                                                                                                                                                                                                                                                                                                                                                                                                                      | NS vs C                                                                                                                                                                                                                                                                                                                                                                                                                                                                                                                                                                                                                                                                                                                                                                                                           |                                                                                                                                                                                                                                                                                                                                                                                                                                                                                                                                                                                                                                                                                                                                                                                                                                                                                                                                                                                                                                                                                                                                                                                                                                                                                                                                                       |  |                |   |               |      |            |             |      |           |             |      |         |          |      |  |               |     |            |             |     |  |             |     |  |          |     |  |  |                  |   |               |                         |           |             |                        |         |             |                       |         |          |      |  |
| <i>IVP3</i>                                                                                                                   | -5.3 (-63.0 to +49.5)                                                                                                                                                                                                                                                                                                                                                                                                                                                                                                                                                                                                                                                                                                                                                                                                                                                                                                                                                                                                                                                                                                                                                                                                                                                                                                                                                                                                                                                                                                                                                                                                       | NS vs C                                                                                                                                                                                                                                                                                                                                                                                                                                                                                                                                                                                                                                                                                                                                                                                                           |                                                                                                                                                                                                                                                                                                                                                                                                                                                                                                                                                                                                                                                                                                                                                                                                                                                                                                                                                                                                                                                                                                                                                                                                                                                                                                                                                       |  |                |   |               |      |            |             |      |           |             |      |         |          |      |  |               |     |            |             |     |  |             |     |  |          |     |  |  |                  |   |               |                         |           |             |                        |         |             |                       |         |          |      |  |
| <i>C</i>                                                                                                                      | +3.7                                                                                                                                                                                                                                                                                                                                                                                                                                                                                                                                                                                                                                                                                                                                                                                                                                                                                                                                                                                                                                                                                                                                                                                                                                                                                                                                                                                                                                                                                                                                                                                                                        |                                                                                                                                                                                                                                                                                                                                                                                                                                                                                                                                                                                                                                                                                                                                                                                                                   |                                                                                                                                                                                                                                                                                                                                                                                                                                                                                                                                                                                                                                                                                                                                                                                                                                                                                                                                                                                                                                                                                                                                                                                                                                                                                                                                                       |  |                |   |               |      |            |             |      |           |             |      |         |          |      |  |               |     |            |             |     |  |             |     |  |          |     |  |  |                  |   |               |                         |           |             |                        |         |             |                       |         |          |      |  |
| <b>Sultan 2011</b> [40]<br>Multicenter international<br><br><b>Design:</b> 2-arm placebo-controlled RCT                       | <b>N:</b> 260 eyes of 260 patients<br><b>Inclusion criteria:</b> ≥18 years, type 1 or 2 DM, DMO involving the center of the macula not associated with ischemia, CMT ≥250 μm, BCVA letter score 65 to 35, IOP ≤21 mmHg, clear ocular media<br><b>Exclusion criteria:</b> any abnormality other than DMO affecting VA assessment, vitreomacular traction; yttrium-aluminium-garnet laser, peripheral retinal cryoablation, laser retinopexy for retinal tears, focal or                                                                                                                                                                                                                                                                                                                                                                                                                                                                                                                                                                                                                                                                                                                                                                                                                                                                                                                                                                                                                                                                                                                                                      | <b>Group 1 (IVP, n=133 eyes):</b> 0.3 mg IV pegaptanib sodium (mean number of injections 12.7 SD4.6)<br><b>Group 2 (C, n=127 eyes):</b> sham injection (mean number of injections 12.9 SD4.4)                                                                                                                                                                                                                                                                                                                                                                                                                                                                                                                                                                                                                     | <b>At 1 year BCVA (ETDRS):</b><br><table border="1"><thead><tr><th></th><th>BCVA (letters)</th><th>p</th></tr></thead><tbody><tr><td><i>IVP</i></td><td>+5.2</td><td>&lt;0.05 vs C</td></tr><tr><td><i>C</i></td><td>+1.2</td><td></td></tr></tbody></table><br><b>plus ≥10</b>                                                                                                                                                                                                                                                                                                                                                                                                                                                                                                                                                                                                                                                                                                                                                                                                                                                                                                                                                                                                                                                                       |  | BCVA (letters) | p | <i>IVP</i>    | +5.2 | <0.05 vs C | <i>C</i>    | +1.2 |           |             |      |         |          |      |  |               |     |            |             |     |  |             |     |  |          |     |  |  |                  |   |               |                         |           |             |                        |         |             |                       |         |          |      |  |
|                                                                                                                               | BCVA (letters)                                                                                                                                                                                                                                                                                                                                                                                                                                                                                                                                                                                                                                                                                                                                                                                                                                                                                                                                                                                                                                                                                                                                                                                                                                                                                                                                                                                                                                                                                                                                                                                                              | p                                                                                                                                                                                                                                                                                                                                                                                                                                                                                                                                                                                                                                                                                                                                                                                                                 |                                                                                                                                                                                                                                                                                                                                                                                                                                                                                                                                                                                                                                                                                                                                                                                                                                                                                                                                                                                                                                                                                                                                                                                                                                                                                                                                                       |  |                |   |               |      |            |             |      |           |             |      |         |          |      |  |               |     |            |             |     |  |             |     |  |          |     |  |  |                  |   |               |                         |           |             |                        |         |             |                       |         |          |      |  |
| <i>IVP</i>                                                                                                                    | +5.2                                                                                                                                                                                                                                                                                                                                                                                                                                                                                                                                                                                                                                                                                                                                                                                                                                                                                                                                                                                                                                                                                                                                                                                                                                                                                                                                                                                                                                                                                                                                                                                                                        | <0.05 vs C                                                                                                                                                                                                                                                                                                                                                                                                                                                                                                                                                                                                                                                                                                                                                                                                        |                                                                                                                                                                                                                                                                                                                                                                                                                                                                                                                                                                                                                                                                                                                                                                                                                                                                                                                                                                                                                                                                                                                                                                                                                                                                                                                                                       |  |                |   |               |      |            |             |      |           |             |      |         |          |      |  |               |     |            |             |     |  |             |     |  |          |     |  |  |                  |   |               |                         |           |             |                        |         |             |                       |         |          |      |  |
| <i>C</i>                                                                                                                      | +1.2                                                                                                                                                                                                                                                                                                                                                                                                                                                                                                                                                                                                                                                                                                                                                                                                                                                                                                                                                                                                                                                                                                                                                                                                                                                                                                                                                                                                                                                                                                                                                                                                                        |                                                                                                                                                                                                                                                                                                                                                                                                                                                                                                                                                                                                                                                                                                                                                                                                                   |                                                                                                                                                                                                                                                                                                                                                                                                                                                                                                                                                                                                                                                                                                                                                                                                                                                                                                                                                                                                                                                                                                                                                                                                                                                                                                                                                       |  |                |   |               |      |            |             |      |           |             |      |         |          |      |  |               |     |            |             |     |  |             |     |  |          |     |  |  |                  |   |               |                         |           |             |                        |         |             |                       |         |          |      |  |

1  
2  
3  
4  
5  
6  
7  
8  
9  
10  
11  
12  
13  
14  
15  
16  
17  
18  
19  
20  
21  
22  
23  
24  
25  
26  
27  
28  
29  
30  
31  
32  
33  
34  
35  
36  
37  
38  
39  
40  
41  
42  
43  
44  
45  
46  
47  
48  
49

| Study                                                           | Participants and baseline values                                                                                                                                                                                                                                                                                                                                                                                                                                                                                                                                                                                                                                                                                                                                                                                                                                                                                                                                                                            | Intervention                                                                                                                                                                                                                                                                                                                                                                                     | Outcome (change from baseline at study end)                                                                                                                                                                                                                                                                                                                                                                                                                                                                                                                                                                                                                                                                                                                                                                                                                                                                                                                                                                                                                                                                                                                                                                                                                                                                                                                                                                                                                                                                                                                                                                                                                                                                                                                                                                                                                                                                                                                                                                                                                                                                                                                                                                                                                                                                                                                                                                                                                   |         |  |  |            |       |             |          |       |  |                                |  |  |            |      |            |          |       |  |                                |  |  |            |       |         |          |      |  |                 |  |  |            |             |         |  |             |  |          |             |  |  |             |  |  |                |   |            |      |            |          |      |  |                  |  |  |            |       |         |          |       |  |                                |  |  |            |      |         |          |       |  |                                |  |  |            |       |           |          |      |  |                 |  |  |            |             |         |  |             |  |
|-----------------------------------------------------------------|-------------------------------------------------------------------------------------------------------------------------------------------------------------------------------------------------------------------------------------------------------------------------------------------------------------------------------------------------------------------------------------------------------------------------------------------------------------------------------------------------------------------------------------------------------------------------------------------------------------------------------------------------------------------------------------------------------------------------------------------------------------------------------------------------------------------------------------------------------------------------------------------------------------------------------------------------------------------------------------------------------------|--------------------------------------------------------------------------------------------------------------------------------------------------------------------------------------------------------------------------------------------------------------------------------------------------------------------------------------------------------------------------------------------------|---------------------------------------------------------------------------------------------------------------------------------------------------------------------------------------------------------------------------------------------------------------------------------------------------------------------------------------------------------------------------------------------------------------------------------------------------------------------------------------------------------------------------------------------------------------------------------------------------------------------------------------------------------------------------------------------------------------------------------------------------------------------------------------------------------------------------------------------------------------------------------------------------------------------------------------------------------------------------------------------------------------------------------------------------------------------------------------------------------------------------------------------------------------------------------------------------------------------------------------------------------------------------------------------------------------------------------------------------------------------------------------------------------------------------------------------------------------------------------------------------------------------------------------------------------------------------------------------------------------------------------------------------------------------------------------------------------------------------------------------------------------------------------------------------------------------------------------------------------------------------------------------------------------------------------------------------------------------------------------------------------------------------------------------------------------------------------------------------------------------------------------------------------------------------------------------------------------------------------------------------------------------------------------------------------------------------------------------------------------------------------------------------------------------------------------------------------------|---------|--|--|------------|-------|-------------|----------|-------|--|--------------------------------|--|--|------------|------|------------|----------|-------|--|--------------------------------|--|--|------------|-------|---------|----------|------|--|-----------------|--|--|------------|-------------|---------|--|-------------|--|----------|-------------|--|--|-------------|--|--|----------------|---|------------|------|------------|----------|------|--|------------------|--|--|------------|-------|---------|----------|-------|--|--------------------------------|--|--|------------|------|---------|----------|-------|--|--------------------------------|--|--|------------|-------|-----------|----------|------|--|-----------------|--|--|------------|-------------|---------|--|-------------|--|
| <b>Follow-up:</b> 2 years (primary efficacy endpoint at 1 year) | grid photocoagulation within prior 16 weeks; panretinal photocoagulation <6 months before baseline or likely to be needed within 9 months; significant media opacities; intraocular surgery in prior 6 months; pathologic high myopia; prior radiation in region of study eye; history of severe cardiac or peripheral vascular disease, stroke in prior 12 months, major surgery in prior 1 month, treatment in prior 90 days with any investigational agent or with bevacizumab for any nonocular condition, HbA1c ≥10% or signs of uncontrolled diabetes, hypertension, known relevant allergies; pregnant or lactating<br><b>Age:</b> 62.3 to 62.5 SD9.3 to 10.2 years<br><b>Sex:</b> 39 to 46% female<br><b>Diabetes type:</b> 6.3 to 7.5% type 1 DM, 92.5 to 93.7% type 2 DM<br><b>HbA1c:</b> 42.5 to 45.9% <7.6%, 54.1 to 57.5% >7.6%<br><b>Baseline VA:</b> letter score 57.0 to 57.5 SD8.1 to 8.9<br><b>Baseline CMT:</b> 441.6 to 464.6 SD135.5 to 148.5 μm<br><b>Comorbidities:</b> not reported | <b>Regimen for all groups:</b> injections every 6 weeks up to week 48 (9 injections); at investigator determination (ETDRS criteria), laser photocoagulation could be performed at week 18, with possible repeat treatment at a minimum of 17 weeks later (maximum 3 treatments per year) (laser treatments in 25.2% of IVP group and 45% of C group); in year 2, injections as judged necessary | <table border="1"> <thead> <tr> <th colspan="3">letters</th> </tr> </thead> <tbody> <tr> <td><i>IVP</i></td> <td>36.8%</td> <td>0.0047 vs C</td> </tr> <tr> <td><i>C</i></td> <td>19.7%</td> <td></td> </tr> </tbody> </table><br><b>Retinopathy:</b> <table border="1"> <thead> <tr> <th colspan="3">increase in degree by ≥2 steps</th> </tr> </thead> <tbody> <tr> <td><i>IVP</i></td> <td>4.1%</td> <td>0.047 vs C</td> </tr> <tr> <td><i>C</i></td> <td>12.4%</td> <td></td> </tr> </tbody> </table> <table border="1"> <thead> <tr> <th colspan="3">decrease in degree by ≥2 steps</th> </tr> </thead> <tbody> <tr> <td><i>IVP</i></td> <td>10.2%</td> <td>NS vs C</td> </tr> <tr> <td><i>C</i></td> <td>3.1%</td> <td></td> </tr> </tbody> </table><br><b>CMT (OCT):</b> <table border="1"> <thead> <tr> <th colspan="3">decrease in CMT</th> </tr> </thead> <tbody> <tr> <td><i>IVP</i></td> <td>≥25%: 31.7%</td> <td>NS vs C</td> </tr> <tr> <td></td> <td>≥50%: 14.6%</td> <td></td> </tr> <tr> <td><i>C</i></td> <td>≥25%: 23.7%</td> <td></td> </tr> <tr> <td></td> <td>≥50%: 11.9%</td> <td></td> </tr> </tbody> </table><br><b>At 2 years</b><br><b>BCVA (ETDRS):</b> <table border="1"> <thead> <tr> <th></th> <th>BCVA (letters)</th> <th>p</th> </tr> </thead> <tbody> <tr> <td><i>IVP</i></td> <td>+6.1</td> <td>&lt;0.01 vs C</td> </tr> <tr> <td><i>C</i></td> <td>+1.3</td> <td></td> </tr> </tbody> </table> <table border="1"> <thead> <tr> <th colspan="3">plus ≥10 letters</th> </tr> </thead> <tbody> <tr> <td><i>IVP</i></td> <td>38.3%</td> <td>NS vs C</td> </tr> <tr> <td><i>C</i></td> <td>30.0%</td> <td></td> </tr> </tbody> </table><br><b>Retinopathy:</b> <table border="1"> <thead> <tr> <th colspan="3">increase in degree by ≥2 steps</th> </tr> </thead> <tbody> <tr> <td><i>IVP</i></td> <td>6.3%</td> <td>NS vs C</td> </tr> <tr> <td><i>C</i></td> <td>13.8%</td> <td></td> </tr> </tbody> </table> <table border="1"> <thead> <tr> <th colspan="3">decrease in degree by ≥2 steps</th> </tr> </thead> <tbody> <tr> <td><i>IVP</i></td> <td>16.3%</td> <td>0.03 vs C</td> </tr> <tr> <td><i>C</i></td> <td>3.8%</td> <td></td> </tr> </tbody> </table><br><b>CMT (OCT):</b> <table border="1"> <thead> <tr> <th colspan="3">decrease in CMT</th> </tr> </thead> <tbody> <tr> <td><i>IVP</i></td> <td>≥25%: 40.4%</td> <td>NS vs C</td> </tr> <tr> <td></td> <td>≥50%: 19.2%</td> <td></td> </tr> </tbody> </table> | letters |  |  | <i>IVP</i> | 36.8% | 0.0047 vs C | <i>C</i> | 19.7% |  | increase in degree by ≥2 steps |  |  | <i>IVP</i> | 4.1% | 0.047 vs C | <i>C</i> | 12.4% |  | decrease in degree by ≥2 steps |  |  | <i>IVP</i> | 10.2% | NS vs C | <i>C</i> | 3.1% |  | decrease in CMT |  |  | <i>IVP</i> | ≥25%: 31.7% | NS vs C |  | ≥50%: 14.6% |  | <i>C</i> | ≥25%: 23.7% |  |  | ≥50%: 11.9% |  |  | BCVA (letters) | p | <i>IVP</i> | +6.1 | <0.01 vs C | <i>C</i> | +1.3 |  | plus ≥10 letters |  |  | <i>IVP</i> | 38.3% | NS vs C | <i>C</i> | 30.0% |  | increase in degree by ≥2 steps |  |  | <i>IVP</i> | 6.3% | NS vs C | <i>C</i> | 13.8% |  | decrease in degree by ≥2 steps |  |  | <i>IVP</i> | 16.3% | 0.03 vs C | <i>C</i> | 3.8% |  | decrease in CMT |  |  | <i>IVP</i> | ≥25%: 40.4% | NS vs C |  | ≥50%: 19.2% |  |
| letters                                                         |                                                                                                                                                                                                                                                                                                                                                                                                                                                                                                                                                                                                                                                                                                                                                                                                                                                                                                                                                                                                             |                                                                                                                                                                                                                                                                                                                                                                                                  |                                                                                                                                                                                                                                                                                                                                                                                                                                                                                                                                                                                                                                                                                                                                                                                                                                                                                                                                                                                                                                                                                                                                                                                                                                                                                                                                                                                                                                                                                                                                                                                                                                                                                                                                                                                                                                                                                                                                                                                                                                                                                                                                                                                                                                                                                                                                                                                                                                                               |         |  |  |            |       |             |          |       |  |                                |  |  |            |      |            |          |       |  |                                |  |  |            |       |         |          |      |  |                 |  |  |            |             |         |  |             |  |          |             |  |  |             |  |  |                |   |            |      |            |          |      |  |                  |  |  |            |       |         |          |       |  |                                |  |  |            |      |         |          |       |  |                                |  |  |            |       |           |          |      |  |                 |  |  |            |             |         |  |             |  |
| <i>IVP</i>                                                      | 36.8%                                                                                                                                                                                                                                                                                                                                                                                                                                                                                                                                                                                                                                                                                                                                                                                                                                                                                                                                                                                                       | 0.0047 vs C                                                                                                                                                                                                                                                                                                                                                                                      |                                                                                                                                                                                                                                                                                                                                                                                                                                                                                                                                                                                                                                                                                                                                                                                                                                                                                                                                                                                                                                                                                                                                                                                                                                                                                                                                                                                                                                                                                                                                                                                                                                                                                                                                                                                                                                                                                                                                                                                                                                                                                                                                                                                                                                                                                                                                                                                                                                                               |         |  |  |            |       |             |          |       |  |                                |  |  |            |      |            |          |       |  |                                |  |  |            |       |         |          |      |  |                 |  |  |            |             |         |  |             |  |          |             |  |  |             |  |  |                |   |            |      |            |          |      |  |                  |  |  |            |       |         |          |       |  |                                |  |  |            |      |         |          |       |  |                                |  |  |            |       |           |          |      |  |                 |  |  |            |             |         |  |             |  |
| <i>C</i>                                                        | 19.7%                                                                                                                                                                                                                                                                                                                                                                                                                                                                                                                                                                                                                                                                                                                                                                                                                                                                                                                                                                                                       |                                                                                                                                                                                                                                                                                                                                                                                                  |                                                                                                                                                                                                                                                                                                                                                                                                                                                                                                                                                                                                                                                                                                                                                                                                                                                                                                                                                                                                                                                                                                                                                                                                                                                                                                                                                                                                                                                                                                                                                                                                                                                                                                                                                                                                                                                                                                                                                                                                                                                                                                                                                                                                                                                                                                                                                                                                                                                               |         |  |  |            |       |             |          |       |  |                                |  |  |            |      |            |          |       |  |                                |  |  |            |       |         |          |      |  |                 |  |  |            |             |         |  |             |  |          |             |  |  |             |  |  |                |   |            |      |            |          |      |  |                  |  |  |            |       |         |          |       |  |                                |  |  |            |      |         |          |       |  |                                |  |  |            |       |           |          |      |  |                 |  |  |            |             |         |  |             |  |
| increase in degree by ≥2 steps                                  |                                                                                                                                                                                                                                                                                                                                                                                                                                                                                                                                                                                                                                                                                                                                                                                                                                                                                                                                                                                                             |                                                                                                                                                                                                                                                                                                                                                                                                  |                                                                                                                                                                                                                                                                                                                                                                                                                                                                                                                                                                                                                                                                                                                                                                                                                                                                                                                                                                                                                                                                                                                                                                                                                                                                                                                                                                                                                                                                                                                                                                                                                                                                                                                                                                                                                                                                                                                                                                                                                                                                                                                                                                                                                                                                                                                                                                                                                                                               |         |  |  |            |       |             |          |       |  |                                |  |  |            |      |            |          |       |  |                                |  |  |            |       |         |          |      |  |                 |  |  |            |             |         |  |             |  |          |             |  |  |             |  |  |                |   |            |      |            |          |      |  |                  |  |  |            |       |         |          |       |  |                                |  |  |            |      |         |          |       |  |                                |  |  |            |       |           |          |      |  |                 |  |  |            |             |         |  |             |  |
| <i>IVP</i>                                                      | 4.1%                                                                                                                                                                                                                                                                                                                                                                                                                                                                                                                                                                                                                                                                                                                                                                                                                                                                                                                                                                                                        | 0.047 vs C                                                                                                                                                                                                                                                                                                                                                                                       |                                                                                                                                                                                                                                                                                                                                                                                                                                                                                                                                                                                                                                                                                                                                                                                                                                                                                                                                                                                                                                                                                                                                                                                                                                                                                                                                                                                                                                                                                                                                                                                                                                                                                                                                                                                                                                                                                                                                                                                                                                                                                                                                                                                                                                                                                                                                                                                                                                                               |         |  |  |            |       |             |          |       |  |                                |  |  |            |      |            |          |       |  |                                |  |  |            |       |         |          |      |  |                 |  |  |            |             |         |  |             |  |          |             |  |  |             |  |  |                |   |            |      |            |          |      |  |                  |  |  |            |       |         |          |       |  |                                |  |  |            |      |         |          |       |  |                                |  |  |            |       |           |          |      |  |                 |  |  |            |             |         |  |             |  |
| <i>C</i>                                                        | 12.4%                                                                                                                                                                                                                                                                                                                                                                                                                                                                                                                                                                                                                                                                                                                                                                                                                                                                                                                                                                                                       |                                                                                                                                                                                                                                                                                                                                                                                                  |                                                                                                                                                                                                                                                                                                                                                                                                                                                                                                                                                                                                                                                                                                                                                                                                                                                                                                                                                                                                                                                                                                                                                                                                                                                                                                                                                                                                                                                                                                                                                                                                                                                                                                                                                                                                                                                                                                                                                                                                                                                                                                                                                                                                                                                                                                                                                                                                                                                               |         |  |  |            |       |             |          |       |  |                                |  |  |            |      |            |          |       |  |                                |  |  |            |       |         |          |      |  |                 |  |  |            |             |         |  |             |  |          |             |  |  |             |  |  |                |   |            |      |            |          |      |  |                  |  |  |            |       |         |          |       |  |                                |  |  |            |      |         |          |       |  |                                |  |  |            |       |           |          |      |  |                 |  |  |            |             |         |  |             |  |
| decrease in degree by ≥2 steps                                  |                                                                                                                                                                                                                                                                                                                                                                                                                                                                                                                                                                                                                                                                                                                                                                                                                                                                                                                                                                                                             |                                                                                                                                                                                                                                                                                                                                                                                                  |                                                                                                                                                                                                                                                                                                                                                                                                                                                                                                                                                                                                                                                                                                                                                                                                                                                                                                                                                                                                                                                                                                                                                                                                                                                                                                                                                                                                                                                                                                                                                                                                                                                                                                                                                                                                                                                                                                                                                                                                                                                                                                                                                                                                                                                                                                                                                                                                                                                               |         |  |  |            |       |             |          |       |  |                                |  |  |            |      |            |          |       |  |                                |  |  |            |       |         |          |      |  |                 |  |  |            |             |         |  |             |  |          |             |  |  |             |  |  |                |   |            |      |            |          |      |  |                  |  |  |            |       |         |          |       |  |                                |  |  |            |      |         |          |       |  |                                |  |  |            |       |           |          |      |  |                 |  |  |            |             |         |  |             |  |
| <i>IVP</i>                                                      | 10.2%                                                                                                                                                                                                                                                                                                                                                                                                                                                                                                                                                                                                                                                                                                                                                                                                                                                                                                                                                                                                       | NS vs C                                                                                                                                                                                                                                                                                                                                                                                          |                                                                                                                                                                                                                                                                                                                                                                                                                                                                                                                                                                                                                                                                                                                                                                                                                                                                                                                                                                                                                                                                                                                                                                                                                                                                                                                                                                                                                                                                                                                                                                                                                                                                                                                                                                                                                                                                                                                                                                                                                                                                                                                                                                                                                                                                                                                                                                                                                                                               |         |  |  |            |       |             |          |       |  |                                |  |  |            |      |            |          |       |  |                                |  |  |            |       |         |          |      |  |                 |  |  |            |             |         |  |             |  |          |             |  |  |             |  |  |                |   |            |      |            |          |      |  |                  |  |  |            |       |         |          |       |  |                                |  |  |            |      |         |          |       |  |                                |  |  |            |       |           |          |      |  |                 |  |  |            |             |         |  |             |  |
| <i>C</i>                                                        | 3.1%                                                                                                                                                                                                                                                                                                                                                                                                                                                                                                                                                                                                                                                                                                                                                                                                                                                                                                                                                                                                        |                                                                                                                                                                                                                                                                                                                                                                                                  |                                                                                                                                                                                                                                                                                                                                                                                                                                                                                                                                                                                                                                                                                                                                                                                                                                                                                                                                                                                                                                                                                                                                                                                                                                                                                                                                                                                                                                                                                                                                                                                                                                                                                                                                                                                                                                                                                                                                                                                                                                                                                                                                                                                                                                                                                                                                                                                                                                                               |         |  |  |            |       |             |          |       |  |                                |  |  |            |      |            |          |       |  |                                |  |  |            |       |         |          |      |  |                 |  |  |            |             |         |  |             |  |          |             |  |  |             |  |  |                |   |            |      |            |          |      |  |                  |  |  |            |       |         |          |       |  |                                |  |  |            |      |         |          |       |  |                                |  |  |            |       |           |          |      |  |                 |  |  |            |             |         |  |             |  |
| decrease in CMT                                                 |                                                                                                                                                                                                                                                                                                                                                                                                                                                                                                                                                                                                                                                                                                                                                                                                                                                                                                                                                                                                             |                                                                                                                                                                                                                                                                                                                                                                                                  |                                                                                                                                                                                                                                                                                                                                                                                                                                                                                                                                                                                                                                                                                                                                                                                                                                                                                                                                                                                                                                                                                                                                                                                                                                                                                                                                                                                                                                                                                                                                                                                                                                                                                                                                                                                                                                                                                                                                                                                                                                                                                                                                                                                                                                                                                                                                                                                                                                                               |         |  |  |            |       |             |          |       |  |                                |  |  |            |      |            |          |       |  |                                |  |  |            |       |         |          |      |  |                 |  |  |            |             |         |  |             |  |          |             |  |  |             |  |  |                |   |            |      |            |          |      |  |                  |  |  |            |       |         |          |       |  |                                |  |  |            |      |         |          |       |  |                                |  |  |            |       |           |          |      |  |                 |  |  |            |             |         |  |             |  |
| <i>IVP</i>                                                      | ≥25%: 31.7%                                                                                                                                                                                                                                                                                                                                                                                                                                                                                                                                                                                                                                                                                                                                                                                                                                                                                                                                                                                                 | NS vs C                                                                                                                                                                                                                                                                                                                                                                                          |                                                                                                                                                                                                                                                                                                                                                                                                                                                                                                                                                                                                                                                                                                                                                                                                                                                                                                                                                                                                                                                                                                                                                                                                                                                                                                                                                                                                                                                                                                                                                                                                                                                                                                                                                                                                                                                                                                                                                                                                                                                                                                                                                                                                                                                                                                                                                                                                                                                               |         |  |  |            |       |             |          |       |  |                                |  |  |            |      |            |          |       |  |                                |  |  |            |       |         |          |      |  |                 |  |  |            |             |         |  |             |  |          |             |  |  |             |  |  |                |   |            |      |            |          |      |  |                  |  |  |            |       |         |          |       |  |                                |  |  |            |      |         |          |       |  |                                |  |  |            |       |           |          |      |  |                 |  |  |            |             |         |  |             |  |
|                                                                 | ≥50%: 14.6%                                                                                                                                                                                                                                                                                                                                                                                                                                                                                                                                                                                                                                                                                                                                                                                                                                                                                                                                                                                                 |                                                                                                                                                                                                                                                                                                                                                                                                  |                                                                                                                                                                                                                                                                                                                                                                                                                                                                                                                                                                                                                                                                                                                                                                                                                                                                                                                                                                                                                                                                                                                                                                                                                                                                                                                                                                                                                                                                                                                                                                                                                                                                                                                                                                                                                                                                                                                                                                                                                                                                                                                                                                                                                                                                                                                                                                                                                                                               |         |  |  |            |       |             |          |       |  |                                |  |  |            |      |            |          |       |  |                                |  |  |            |       |         |          |      |  |                 |  |  |            |             |         |  |             |  |          |             |  |  |             |  |  |                |   |            |      |            |          |      |  |                  |  |  |            |       |         |          |       |  |                                |  |  |            |      |         |          |       |  |                                |  |  |            |       |           |          |      |  |                 |  |  |            |             |         |  |             |  |
| <i>C</i>                                                        | ≥25%: 23.7%                                                                                                                                                                                                                                                                                                                                                                                                                                                                                                                                                                                                                                                                                                                                                                                                                                                                                                                                                                                                 |                                                                                                                                                                                                                                                                                                                                                                                                  |                                                                                                                                                                                                                                                                                                                                                                                                                                                                                                                                                                                                                                                                                                                                                                                                                                                                                                                                                                                                                                                                                                                                                                                                                                                                                                                                                                                                                                                                                                                                                                                                                                                                                                                                                                                                                                                                                                                                                                                                                                                                                                                                                                                                                                                                                                                                                                                                                                                               |         |  |  |            |       |             |          |       |  |                                |  |  |            |      |            |          |       |  |                                |  |  |            |       |         |          |      |  |                 |  |  |            |             |         |  |             |  |          |             |  |  |             |  |  |                |   |            |      |            |          |      |  |                  |  |  |            |       |         |          |       |  |                                |  |  |            |      |         |          |       |  |                                |  |  |            |       |           |          |      |  |                 |  |  |            |             |         |  |             |  |
|                                                                 | ≥50%: 11.9%                                                                                                                                                                                                                                                                                                                                                                                                                                                                                                                                                                                                                                                                                                                                                                                                                                                                                                                                                                                                 |                                                                                                                                                                                                                                                                                                                                                                                                  |                                                                                                                                                                                                                                                                                                                                                                                                                                                                                                                                                                                                                                                                                                                                                                                                                                                                                                                                                                                                                                                                                                                                                                                                                                                                                                                                                                                                                                                                                                                                                                                                                                                                                                                                                                                                                                                                                                                                                                                                                                                                                                                                                                                                                                                                                                                                                                                                                                                               |         |  |  |            |       |             |          |       |  |                                |  |  |            |      |            |          |       |  |                                |  |  |            |       |         |          |      |  |                 |  |  |            |             |         |  |             |  |          |             |  |  |             |  |  |                |   |            |      |            |          |      |  |                  |  |  |            |       |         |          |       |  |                                |  |  |            |      |         |          |       |  |                                |  |  |            |       |           |          |      |  |                 |  |  |            |             |         |  |             |  |
|                                                                 | BCVA (letters)                                                                                                                                                                                                                                                                                                                                                                                                                                                                                                                                                                                                                                                                                                                                                                                                                                                                                                                                                                                              | p                                                                                                                                                                                                                                                                                                                                                                                                |                                                                                                                                                                                                                                                                                                                                                                                                                                                                                                                                                                                                                                                                                                                                                                                                                                                                                                                                                                                                                                                                                                                                                                                                                                                                                                                                                                                                                                                                                                                                                                                                                                                                                                                                                                                                                                                                                                                                                                                                                                                                                                                                                                                                                                                                                                                                                                                                                                                               |         |  |  |            |       |             |          |       |  |                                |  |  |            |      |            |          |       |  |                                |  |  |            |       |         |          |      |  |                 |  |  |            |             |         |  |             |  |          |             |  |  |             |  |  |                |   |            |      |            |          |      |  |                  |  |  |            |       |         |          |       |  |                                |  |  |            |      |         |          |       |  |                                |  |  |            |       |           |          |      |  |                 |  |  |            |             |         |  |             |  |
| <i>IVP</i>                                                      | +6.1                                                                                                                                                                                                                                                                                                                                                                                                                                                                                                                                                                                                                                                                                                                                                                                                                                                                                                                                                                                                        | <0.01 vs C                                                                                                                                                                                                                                                                                                                                                                                       |                                                                                                                                                                                                                                                                                                                                                                                                                                                                                                                                                                                                                                                                                                                                                                                                                                                                                                                                                                                                                                                                                                                                                                                                                                                                                                                                                                                                                                                                                                                                                                                                                                                                                                                                                                                                                                                                                                                                                                                                                                                                                                                                                                                                                                                                                                                                                                                                                                                               |         |  |  |            |       |             |          |       |  |                                |  |  |            |      |            |          |       |  |                                |  |  |            |       |         |          |      |  |                 |  |  |            |             |         |  |             |  |          |             |  |  |             |  |  |                |   |            |      |            |          |      |  |                  |  |  |            |       |         |          |       |  |                                |  |  |            |      |         |          |       |  |                                |  |  |            |       |           |          |      |  |                 |  |  |            |             |         |  |             |  |
| <i>C</i>                                                        | +1.3                                                                                                                                                                                                                                                                                                                                                                                                                                                                                                                                                                                                                                                                                                                                                                                                                                                                                                                                                                                                        |                                                                                                                                                                                                                                                                                                                                                                                                  |                                                                                                                                                                                                                                                                                                                                                                                                                                                                                                                                                                                                                                                                                                                                                                                                                                                                                                                                                                                                                                                                                                                                                                                                                                                                                                                                                                                                                                                                                                                                                                                                                                                                                                                                                                                                                                                                                                                                                                                                                                                                                                                                                                                                                                                                                                                                                                                                                                                               |         |  |  |            |       |             |          |       |  |                                |  |  |            |      |            |          |       |  |                                |  |  |            |       |         |          |      |  |                 |  |  |            |             |         |  |             |  |          |             |  |  |             |  |  |                |   |            |      |            |          |      |  |                  |  |  |            |       |         |          |       |  |                                |  |  |            |      |         |          |       |  |                                |  |  |            |       |           |          |      |  |                 |  |  |            |             |         |  |             |  |
| plus ≥10 letters                                                |                                                                                                                                                                                                                                                                                                                                                                                                                                                                                                                                                                                                                                                                                                                                                                                                                                                                                                                                                                                                             |                                                                                                                                                                                                                                                                                                                                                                                                  |                                                                                                                                                                                                                                                                                                                                                                                                                                                                                                                                                                                                                                                                                                                                                                                                                                                                                                                                                                                                                                                                                                                                                                                                                                                                                                                                                                                                                                                                                                                                                                                                                                                                                                                                                                                                                                                                                                                                                                                                                                                                                                                                                                                                                                                                                                                                                                                                                                                               |         |  |  |            |       |             |          |       |  |                                |  |  |            |      |            |          |       |  |                                |  |  |            |       |         |          |      |  |                 |  |  |            |             |         |  |             |  |          |             |  |  |             |  |  |                |   |            |      |            |          |      |  |                  |  |  |            |       |         |          |       |  |                                |  |  |            |      |         |          |       |  |                                |  |  |            |       |           |          |      |  |                 |  |  |            |             |         |  |             |  |
| <i>IVP</i>                                                      | 38.3%                                                                                                                                                                                                                                                                                                                                                                                                                                                                                                                                                                                                                                                                                                                                                                                                                                                                                                                                                                                                       | NS vs C                                                                                                                                                                                                                                                                                                                                                                                          |                                                                                                                                                                                                                                                                                                                                                                                                                                                                                                                                                                                                                                                                                                                                                                                                                                                                                                                                                                                                                                                                                                                                                                                                                                                                                                                                                                                                                                                                                                                                                                                                                                                                                                                                                                                                                                                                                                                                                                                                                                                                                                                                                                                                                                                                                                                                                                                                                                                               |         |  |  |            |       |             |          |       |  |                                |  |  |            |      |            |          |       |  |                                |  |  |            |       |         |          |      |  |                 |  |  |            |             |         |  |             |  |          |             |  |  |             |  |  |                |   |            |      |            |          |      |  |                  |  |  |            |       |         |          |       |  |                                |  |  |            |      |         |          |       |  |                                |  |  |            |       |           |          |      |  |                 |  |  |            |             |         |  |             |  |
| <i>C</i>                                                        | 30.0%                                                                                                                                                                                                                                                                                                                                                                                                                                                                                                                                                                                                                                                                                                                                                                                                                                                                                                                                                                                                       |                                                                                                                                                                                                                                                                                                                                                                                                  |                                                                                                                                                                                                                                                                                                                                                                                                                                                                                                                                                                                                                                                                                                                                                                                                                                                                                                                                                                                                                                                                                                                                                                                                                                                                                                                                                                                                                                                                                                                                                                                                                                                                                                                                                                                                                                                                                                                                                                                                                                                                                                                                                                                                                                                                                                                                                                                                                                                               |         |  |  |            |       |             |          |       |  |                                |  |  |            |      |            |          |       |  |                                |  |  |            |       |         |          |      |  |                 |  |  |            |             |         |  |             |  |          |             |  |  |             |  |  |                |   |            |      |            |          |      |  |                  |  |  |            |       |         |          |       |  |                                |  |  |            |      |         |          |       |  |                                |  |  |            |       |           |          |      |  |                 |  |  |            |             |         |  |             |  |
| increase in degree by ≥2 steps                                  |                                                                                                                                                                                                                                                                                                                                                                                                                                                                                                                                                                                                                                                                                                                                                                                                                                                                                                                                                                                                             |                                                                                                                                                                                                                                                                                                                                                                                                  |                                                                                                                                                                                                                                                                                                                                                                                                                                                                                                                                                                                                                                                                                                                                                                                                                                                                                                                                                                                                                                                                                                                                                                                                                                                                                                                                                                                                                                                                                                                                                                                                                                                                                                                                                                                                                                                                                                                                                                                                                                                                                                                                                                                                                                                                                                                                                                                                                                                               |         |  |  |            |       |             |          |       |  |                                |  |  |            |      |            |          |       |  |                                |  |  |            |       |         |          |      |  |                 |  |  |            |             |         |  |             |  |          |             |  |  |             |  |  |                |   |            |      |            |          |      |  |                  |  |  |            |       |         |          |       |  |                                |  |  |            |      |         |          |       |  |                                |  |  |            |       |           |          |      |  |                 |  |  |            |             |         |  |             |  |
| <i>IVP</i>                                                      | 6.3%                                                                                                                                                                                                                                                                                                                                                                                                                                                                                                                                                                                                                                                                                                                                                                                                                                                                                                                                                                                                        | NS vs C                                                                                                                                                                                                                                                                                                                                                                                          |                                                                                                                                                                                                                                                                                                                                                                                                                                                                                                                                                                                                                                                                                                                                                                                                                                                                                                                                                                                                                                                                                                                                                                                                                                                                                                                                                                                                                                                                                                                                                                                                                                                                                                                                                                                                                                                                                                                                                                                                                                                                                                                                                                                                                                                                                                                                                                                                                                                               |         |  |  |            |       |             |          |       |  |                                |  |  |            |      |            |          |       |  |                                |  |  |            |       |         |          |      |  |                 |  |  |            |             |         |  |             |  |          |             |  |  |             |  |  |                |   |            |      |            |          |      |  |                  |  |  |            |       |         |          |       |  |                                |  |  |            |      |         |          |       |  |                                |  |  |            |       |           |          |      |  |                 |  |  |            |             |         |  |             |  |
| <i>C</i>                                                        | 13.8%                                                                                                                                                                                                                                                                                                                                                                                                                                                                                                                                                                                                                                                                                                                                                                                                                                                                                                                                                                                                       |                                                                                                                                                                                                                                                                                                                                                                                                  |                                                                                                                                                                                                                                                                                                                                                                                                                                                                                                                                                                                                                                                                                                                                                                                                                                                                                                                                                                                                                                                                                                                                                                                                                                                                                                                                                                                                                                                                                                                                                                                                                                                                                                                                                                                                                                                                                                                                                                                                                                                                                                                                                                                                                                                                                                                                                                                                                                                               |         |  |  |            |       |             |          |       |  |                                |  |  |            |      |            |          |       |  |                                |  |  |            |       |         |          |      |  |                 |  |  |            |             |         |  |             |  |          |             |  |  |             |  |  |                |   |            |      |            |          |      |  |                  |  |  |            |       |         |          |       |  |                                |  |  |            |      |         |          |       |  |                                |  |  |            |       |           |          |      |  |                 |  |  |            |             |         |  |             |  |
| decrease in degree by ≥2 steps                                  |                                                                                                                                                                                                                                                                                                                                                                                                                                                                                                                                                                                                                                                                                                                                                                                                                                                                                                                                                                                                             |                                                                                                                                                                                                                                                                                                                                                                                                  |                                                                                                                                                                                                                                                                                                                                                                                                                                                                                                                                                                                                                                                                                                                                                                                                                                                                                                                                                                                                                                                                                                                                                                                                                                                                                                                                                                                                                                                                                                                                                                                                                                                                                                                                                                                                                                                                                                                                                                                                                                                                                                                                                                                                                                                                                                                                                                                                                                                               |         |  |  |            |       |             |          |       |  |                                |  |  |            |      |            |          |       |  |                                |  |  |            |       |         |          |      |  |                 |  |  |            |             |         |  |             |  |          |             |  |  |             |  |  |                |   |            |      |            |          |      |  |                  |  |  |            |       |         |          |       |  |                                |  |  |            |      |         |          |       |  |                                |  |  |            |       |           |          |      |  |                 |  |  |            |             |         |  |             |  |
| <i>IVP</i>                                                      | 16.3%                                                                                                                                                                                                                                                                                                                                                                                                                                                                                                                                                                                                                                                                                                                                                                                                                                                                                                                                                                                                       | 0.03 vs C                                                                                                                                                                                                                                                                                                                                                                                        |                                                                                                                                                                                                                                                                                                                                                                                                                                                                                                                                                                                                                                                                                                                                                                                                                                                                                                                                                                                                                                                                                                                                                                                                                                                                                                                                                                                                                                                                                                                                                                                                                                                                                                                                                                                                                                                                                                                                                                                                                                                                                                                                                                                                                                                                                                                                                                                                                                                               |         |  |  |            |       |             |          |       |  |                                |  |  |            |      |            |          |       |  |                                |  |  |            |       |         |          |      |  |                 |  |  |            |             |         |  |             |  |          |             |  |  |             |  |  |                |   |            |      |            |          |      |  |                  |  |  |            |       |         |          |       |  |                                |  |  |            |      |         |          |       |  |                                |  |  |            |       |           |          |      |  |                 |  |  |            |             |         |  |             |  |
| <i>C</i>                                                        | 3.8%                                                                                                                                                                                                                                                                                                                                                                                                                                                                                                                                                                                                                                                                                                                                                                                                                                                                                                                                                                                                        |                                                                                                                                                                                                                                                                                                                                                                                                  |                                                                                                                                                                                                                                                                                                                                                                                                                                                                                                                                                                                                                                                                                                                                                                                                                                                                                                                                                                                                                                                                                                                                                                                                                                                                                                                                                                                                                                                                                                                                                                                                                                                                                                                                                                                                                                                                                                                                                                                                                                                                                                                                                                                                                                                                                                                                                                                                                                                               |         |  |  |            |       |             |          |       |  |                                |  |  |            |      |            |          |       |  |                                |  |  |            |       |         |          |      |  |                 |  |  |            |             |         |  |             |  |          |             |  |  |             |  |  |                |   |            |      |            |          |      |  |                  |  |  |            |       |         |          |       |  |                                |  |  |            |      |         |          |       |  |                                |  |  |            |       |           |          |      |  |                 |  |  |            |             |         |  |             |  |
| decrease in CMT                                                 |                                                                                                                                                                                                                                                                                                                                                                                                                                                                                                                                                                                                                                                                                                                                                                                                                                                                                                                                                                                                             |                                                                                                                                                                                                                                                                                                                                                                                                  |                                                                                                                                                                                                                                                                                                                                                                                                                                                                                                                                                                                                                                                                                                                                                                                                                                                                                                                                                                                                                                                                                                                                                                                                                                                                                                                                                                                                                                                                                                                                                                                                                                                                                                                                                                                                                                                                                                                                                                                                                                                                                                                                                                                                                                                                                                                                                                                                                                                               |         |  |  |            |       |             |          |       |  |                                |  |  |            |      |            |          |       |  |                                |  |  |            |       |         |          |      |  |                 |  |  |            |             |         |  |             |  |          |             |  |  |             |  |  |                |   |            |      |            |          |      |  |                  |  |  |            |       |         |          |       |  |                                |  |  |            |      |         |          |       |  |                                |  |  |            |       |           |          |      |  |                 |  |  |            |             |         |  |             |  |
| <i>IVP</i>                                                      | ≥25%: 40.4%                                                                                                                                                                                                                                                                                                                                                                                                                                                                                                                                                                                                                                                                                                                                                                                                                                                                                                                                                                                                 | NS vs C                                                                                                                                                                                                                                                                                                                                                                                          |                                                                                                                                                                                                                                                                                                                                                                                                                                                                                                                                                                                                                                                                                                                                                                                                                                                                                                                                                                                                                                                                                                                                                                                                                                                                                                                                                                                                                                                                                                                                                                                                                                                                                                                                                                                                                                                                                                                                                                                                                                                                                                                                                                                                                                                                                                                                                                                                                                                               |         |  |  |            |       |             |          |       |  |                                |  |  |            |      |            |          |       |  |                                |  |  |            |       |         |          |      |  |                 |  |  |            |             |         |  |             |  |          |             |  |  |             |  |  |                |   |            |      |            |          |      |  |                  |  |  |            |       |         |          |       |  |                                |  |  |            |      |         |          |       |  |                                |  |  |            |       |           |          |      |  |                 |  |  |            |             |         |  |             |  |
|                                                                 | ≥50%: 19.2%                                                                                                                                                                                                                                                                                                                                                                                                                                                                                                                                                                                                                                                                                                                                                                                                                                                                                                                                                                                                 |                                                                                                                                                                                                                                                                                                                                                                                                  |                                                                                                                                                                                                                                                                                                                                                                                                                                                                                                                                                                                                                                                                                                                                                                                                                                                                                                                                                                                                                                                                                                                                                                                                                                                                                                                                                                                                                                                                                                                                                                                                                                                                                                                                                                                                                                                                                                                                                                                                                                                                                                                                                                                                                                                                                                                                                                                                                                                               |         |  |  |            |       |             |          |       |  |                                |  |  |            |      |            |          |       |  |                                |  |  |            |       |         |          |      |  |                 |  |  |            |             |         |  |             |  |          |             |  |  |             |  |  |                |   |            |      |            |          |      |  |                  |  |  |            |       |         |          |       |  |                                |  |  |            |      |         |          |       |  |                                |  |  |            |       |           |          |      |  |                 |  |  |            |             |         |  |             |  |



1  
2  
3  
4  
5  
6  
7  
8  
9  
10  
11  
12  
13  
14  
15  
16  
17  
18  
19  
20  
21  
22  
23  
24  
25  
26  
27  
28  
29  
30  
31  
32  
33  
34  
35  
36  
37  
38  
39  
40  
41  
42  
43  
44  
45  
46  
47  
48  
49

| Study | Participants and baseline values | Intervention | Outcome (change from baseline at study end)                                                                                                                                                                                                                                                                                                                                                                                                                            |
|-------|----------------------------------|--------------|------------------------------------------------------------------------------------------------------------------------------------------------------------------------------------------------------------------------------------------------------------------------------------------------------------------------------------------------------------------------------------------------------------------------------------------------------------------------|
|       |                                  |              | <p><b>C</b></p> <p>≥25%: 44.6%</p> <hr/> <p>≥50%: 26.1%</p> <p><b>QoL:</b></p> <ul style="list-style-type: none"> <li>• NEI VFQ-25: between group differences not significant at 54 weeks; at 102 weeks, significantly greater improvement in composite score and subscales distance vision activities, social functioning and mental health with pegaptanib</li> <li>• EQ-5D: no significant differences between groups in EQ-5D scores at weeks 54 or 102</li> </ul> |

For peer review only

1  
2  
3  
4  
5  
6  
7  
8  
9  
10  
11  
12  
13  
14  
15  
16  
17  
18  
19  
20  
21  
22  
23  
24  
25  
26  
27  
28  
29  
30  
31  
32  
33  
34  
35  
36  
37  
38  
39  
40  
41  
42  
43  
44  
45  
46  
47  
48  
49

| Study                                                                                                                                                             | Participants and baseline values                                                                                                                                                                                                                                                                                                                                                                                                                                                                                                                                                                                                                                                                                                                                                                                                                                                                                                                                                                                                                                                                                                                                                                                                                                                                                                                                                                                                                                                                                                                                                                                                                                                                                                                                                                                                                                                                                                                                                                                                                                                                                                                                                                                                                                                                                                                                                                                                                                                                                                                                                                                                                                                                                           | Intervention                                                                                                                                                                                                                                                                                                                                                                                                                                                                                                            | Outcome (change from baseline at study end)                                                                                                                                                                                                                                                                                                                                                                                                                                                                                                                                                                                                                                                                                                                                                                                                                                                                                                                                                                                                                                                                                                                                                                                                                                                                                                                                                                                                                                                                                                                                                                                                                                                                                                                                                                                                                                                                                                                                                                                                                                                                                                                                                                                                                  |  |                |   |               |      |            |               |       |              |               |      |            |               |       |             |          |      |  |  |                         |  |               |     |    |               |     |    |               |     |    |               |     |    |          |     |    |  |         |  |               |        |             |               |        |              |               |        |            |               |        |              |          |       |  |  |                |   |               |       |              |               |       |              |               |      |              |               |       |              |          |      |  |  |                         |  |               |       |             |               |       |             |               |       |             |               |       |             |          |       |  |
|-------------------------------------------------------------------------------------------------------------------------------------------------------------------|----------------------------------------------------------------------------------------------------------------------------------------------------------------------------------------------------------------------------------------------------------------------------------------------------------------------------------------------------------------------------------------------------------------------------------------------------------------------------------------------------------------------------------------------------------------------------------------------------------------------------------------------------------------------------------------------------------------------------------------------------------------------------------------------------------------------------------------------------------------------------------------------------------------------------------------------------------------------------------------------------------------------------------------------------------------------------------------------------------------------------------------------------------------------------------------------------------------------------------------------------------------------------------------------------------------------------------------------------------------------------------------------------------------------------------------------------------------------------------------------------------------------------------------------------------------------------------------------------------------------------------------------------------------------------------------------------------------------------------------------------------------------------------------------------------------------------------------------------------------------------------------------------------------------------------------------------------------------------------------------------------------------------------------------------------------------------------------------------------------------------------------------------------------------------------------------------------------------------------------------------------------------------------------------------------------------------------------------------------------------------------------------------------------------------------------------------------------------------------------------------------------------------------------------------------------------------------------------------------------------------------------------------------------------------------------------------------------------------|-------------------------------------------------------------------------------------------------------------------------------------------------------------------------------------------------------------------------------------------------------------------------------------------------------------------------------------------------------------------------------------------------------------------------------------------------------------------------------------------------------------------------|--------------------------------------------------------------------------------------------------------------------------------------------------------------------------------------------------------------------------------------------------------------------------------------------------------------------------------------------------------------------------------------------------------------------------------------------------------------------------------------------------------------------------------------------------------------------------------------------------------------------------------------------------------------------------------------------------------------------------------------------------------------------------------------------------------------------------------------------------------------------------------------------------------------------------------------------------------------------------------------------------------------------------------------------------------------------------------------------------------------------------------------------------------------------------------------------------------------------------------------------------------------------------------------------------------------------------------------------------------------------------------------------------------------------------------------------------------------------------------------------------------------------------------------------------------------------------------------------------------------------------------------------------------------------------------------------------------------------------------------------------------------------------------------------------------------------------------------------------------------------------------------------------------------------------------------------------------------------------------------------------------------------------------------------------------------------------------------------------------------------------------------------------------------------------------------------------------------------------------------------------------------|--|----------------|---|---------------|------|------------|---------------|-------|--------------|---------------|------|------------|---------------|-------|-------------|----------|------|--|--|-------------------------|--|---------------|-----|----|---------------|-----|----|---------------|-----|----|---------------|-----|----|----------|-----|----|--|---------|--|---------------|--------|-------------|---------------|--------|--------------|---------------|--------|------------|---------------|--------|--------------|----------|-------|--|--|----------------|---|---------------|-------|--------------|---------------|-------|--------------|---------------|------|--------------|---------------|-------|--------------|----------|------|--|--|-------------------------|--|---------------|-------|-------------|---------------|-------|-------------|---------------|-------|-------------|---------------|-------|-------------|----------|-------|--|
| <p><i>Aflibercept</i></p> <p><b>DA VINCI 2010 (Do 2011)</b><br/>Multicenter[30,58]</p> <p><b>Design:</b> 5-arm phase II RCT</p> <p><b>Follow-up:</b> 24 weeks</p> | <p><b>N:</b> 221 eyes of 221 patients</p> <p><b>Inclusion criteria:</b> aged &gt;18 years and diagnosed with type 1 or 2 diabetes mellitus, with DMO involving the central macula defined as CRT (&gt;250 um in the central subfield. Participants were required to have BCVA letter score at 4 m of 73 to 24. Women of childbearing potential were included only if they were willing to not become pregnant and to use a reliable form of birth control during the study period.</p> <p><b>Exclusion criteria:</b> history of vitreoretinal surgery; panretinal or macular laser photocoagulation or use of intraocular or periocular corticosteroids or anti-angiogenic drugs within 3 months of screening; vision decrease due to causes other than DMO; proliferative diabetic retinopathy (unless regressed and currently inactive); ocular inflammation; cataract or other intraocular surgery within 3 months of screening, laser capsulotomy within 2 months of screening; aphakia; spherical equivalent of &gt;8 diopters; or any concurrent disease that would compromise visual acuity or require medical or surgical intervention during the study period: active iris neovascularization, vitreous hemorrhage, traction retinal detachment, or preretinal fibrosis involving the macula; visually significant vitreomacular traction or epiretinal membrane evident biomicroscopically or on OCT; history of idiopathic or autoimmune uveitis; structural damage to the center of the macula that is likely to preclude improvement in visual acuity after the resolution of macular oedema; uncontrolled glaucoma or previous filtration surgery; infectious blepharitis, keratitis, scleritis, or conjunctivitis; or current treatment for serious systemic infection: uncontrolled diabetes mellitus; uncontrolled hypertension; history of cerebral vascular accident or myocardial infarction within 6 months; renal failure requiring dialysis or renal transplant; pregnancy or lactation; history of allergy to fluorescein or povidone iodine; only 1 functional eye (even if the eye met all other entry criteria); or an ocular condition in the fellow eye with a poorer prognosis than the study eye</p> <p><b>Age:</b> 60.7 to 64.0 years (SD 8.1 to 11.5)</p> <p><b>Sex:</b> % female 35.6% to 47.6%</p> <p><b>Diabetes type:</b> % type 2, 88.6% to 97.7%</p> <p><b>HbA1c:</b> 7.85 to 8.10 (SD 1.71 to 1.94)</p> <p><b>Baseline VA:</b> 57.6 to 59.9 (SD 10.1 to 12.5)</p> <p><b>Baseline CMT:</b> 426.1 um to 456.6 um (SD 111.8 to 152.4)</p> <p><b>Co morbidities:</b> history of any cardiac disease was twice as common in the VEGF Trap-Eye groups compared with the laser group.</p> | <p>Trial of VEGF Trap-Eye (VTE), randomized on a 1:1:1:1:1 basis</p> <p><b>Group 1 (IVVTE1, n=44 eyes):</b> IV VTE, 0.5 mg every 4 weeks</p> <p><b>Group 2 (IVVTE2, n=44 eyes):</b> IV VTE, 2 mg every 4 weeks</p> <p><b>Group 3 (IVVTE3, n=42 eyes):</b> IV VTE, 2 mg for 3 initial months then every 8 weeks</p> <p><b>Group 4 (IVVTE4, n=45 eyes):</b> IV VTE, 2 mg for 3 initial months then as needed</p> <p><b>Group 5 (L, n=44 eyes):</b> laser photocoagulation</p> <p><b>Laser Modified ETDRS protocol</b></p> | <p><b>At 6 months</b></p> <table border="1"> <thead> <tr> <th></th> <th>BCVA (letters)</th> <th>p</th> </tr> </thead> <tbody> <tr> <td><i>IVVTE1</i></td> <td>+8.6</td> <td>0.005 vs L</td> </tr> <tr> <td><i>IVVTE2</i></td> <td>+11.4</td> <td>&lt;0.0001 vs L</td> </tr> <tr> <td><i>IVVTE3</i></td> <td>+8.5</td> <td>0.008 vs L</td> </tr> <tr> <td><i>IVVTE3</i></td> <td>+10.3</td> <td>0.0004 vs L</td> </tr> <tr> <td><i>L</i></td> <td>+2.5</td> <td></td> </tr> <tr> <td></td> <td><b>plus ≥10 letters</b></td> <td></td> </tr> <tr> <td><i>IVVTE1</i></td> <td>50%</td> <td>NR</td> </tr> <tr> <td><i>IVVTE2</i></td> <td>64%</td> <td>NR</td> </tr> <tr> <td><i>IVVTE3</i></td> <td>43%</td> <td>NR</td> </tr> <tr> <td><i>IVVTE3</i></td> <td>58%</td> <td>NR</td> </tr> <tr> <td><i>L</i></td> <td>32%</td> <td>NR</td> </tr> </tbody> </table><br><table border="1"> <thead> <tr> <th></th> <th colspan="2">CMT(um)</th> </tr> </thead> <tbody> <tr> <td><i>IVVTE1</i></td> <td>-144.6</td> <td>0.0002 vs L</td> </tr> <tr> <td><i>IVVTE2</i></td> <td>-194.5</td> <td>&lt;0.0001 vs L</td> </tr> <tr> <td><i>IVVTE3</i></td> <td>-127.3</td> <td>0.007 vs L</td> </tr> <tr> <td><i>IVVTE3</i></td> <td>-153.3</td> <td>&lt;0.0001 vs L</td> </tr> <tr> <td><i>L</i></td> <td>-67.9</td> <td></td> </tr> </tbody> </table><br><p><b>At 12 months</b></p> <table border="1"> <thead> <tr> <th></th> <th>BCVA (letters)</th> <th>p</th> </tr> </thead> <tbody> <tr> <td><i>IVVTE1</i></td> <td>+11.0</td> <td>≤0.0001 vs L</td> </tr> <tr> <td><i>IVVTE2</i></td> <td>+13.1</td> <td>≤0.0001 vs L</td> </tr> <tr> <td><i>IVVTE3</i></td> <td>+9.7</td> <td>≤0.0001 vs L</td> </tr> <tr> <td><i>IVVTE3</i></td> <td>+12.0</td> <td>≤0.0001 vs L</td> </tr> <tr> <td><i>L</i></td> <td>-1.3</td> <td></td> </tr> <tr> <td></td> <td><b>plus ≥15 letters</b></td> <td></td> </tr> <tr> <td><i>IVVTE1</i></td> <td>40.9%</td> <td>0.0031 vs L</td> </tr> <tr> <td><i>IVVTE2</i></td> <td>45.5%</td> <td>0.0007 vs L</td> </tr> <tr> <td><i>IVVTE3</i></td> <td>23.8%</td> <td>0.1608 vs L</td> </tr> <tr> <td><i>IVVTE3</i></td> <td>42.2%</td> <td>0.0016 vs L</td> </tr> <tr> <td><i>L</i></td> <td>11.4%</td> <td></td> </tr> </tbody> </table> |  | BCVA (letters) | p | <i>IVVTE1</i> | +8.6 | 0.005 vs L | <i>IVVTE2</i> | +11.4 | <0.0001 vs L | <i>IVVTE3</i> | +8.5 | 0.008 vs L | <i>IVVTE3</i> | +10.3 | 0.0004 vs L | <i>L</i> | +2.5 |  |  | <b>plus ≥10 letters</b> |  | <i>IVVTE1</i> | 50% | NR | <i>IVVTE2</i> | 64% | NR | <i>IVVTE3</i> | 43% | NR | <i>IVVTE3</i> | 58% | NR | <i>L</i> | 32% | NR |  | CMT(um) |  | <i>IVVTE1</i> | -144.6 | 0.0002 vs L | <i>IVVTE2</i> | -194.5 | <0.0001 vs L | <i>IVVTE3</i> | -127.3 | 0.007 vs L | <i>IVVTE3</i> | -153.3 | <0.0001 vs L | <i>L</i> | -67.9 |  |  | BCVA (letters) | p | <i>IVVTE1</i> | +11.0 | ≤0.0001 vs L | <i>IVVTE2</i> | +13.1 | ≤0.0001 vs L | <i>IVVTE3</i> | +9.7 | ≤0.0001 vs L | <i>IVVTE3</i> | +12.0 | ≤0.0001 vs L | <i>L</i> | -1.3 |  |  | <b>plus ≥15 letters</b> |  | <i>IVVTE1</i> | 40.9% | 0.0031 vs L | <i>IVVTE2</i> | 45.5% | 0.0007 vs L | <i>IVVTE3</i> | 23.8% | 0.1608 vs L | <i>IVVTE3</i> | 42.2% | 0.0016 vs L | <i>L</i> | 11.4% |  |
|                                                                                                                                                                   | BCVA (letters)                                                                                                                                                                                                                                                                                                                                                                                                                                                                                                                                                                                                                                                                                                                                                                                                                                                                                                                                                                                                                                                                                                                                                                                                                                                                                                                                                                                                                                                                                                                                                                                                                                                                                                                                                                                                                                                                                                                                                                                                                                                                                                                                                                                                                                                                                                                                                                                                                                                                                                                                                                                                                                                                                                             | p                                                                                                                                                                                                                                                                                                                                                                                                                                                                                                                       |                                                                                                                                                                                                                                                                                                                                                                                                                                                                                                                                                                                                                                                                                                                                                                                                                                                                                                                                                                                                                                                                                                                                                                                                                                                                                                                                                                                                                                                                                                                                                                                                                                                                                                                                                                                                                                                                                                                                                                                                                                                                                                                                                                                                                                                              |  |                |   |               |      |            |               |       |              |               |      |            |               |       |             |          |      |  |  |                         |  |               |     |    |               |     |    |               |     |    |               |     |    |          |     |    |  |         |  |               |        |             |               |        |              |               |        |            |               |        |              |          |       |  |  |                |   |               |       |              |               |       |              |               |      |              |               |       |              |          |      |  |  |                         |  |               |       |             |               |       |             |               |       |             |               |       |             |          |       |  |
| <i>IVVTE1</i>                                                                                                                                                     | +8.6                                                                                                                                                                                                                                                                                                                                                                                                                                                                                                                                                                                                                                                                                                                                                                                                                                                                                                                                                                                                                                                                                                                                                                                                                                                                                                                                                                                                                                                                                                                                                                                                                                                                                                                                                                                                                                                                                                                                                                                                                                                                                                                                                                                                                                                                                                                                                                                                                                                                                                                                                                                                                                                                                                                       | 0.005 vs L                                                                                                                                                                                                                                                                                                                                                                                                                                                                                                              |                                                                                                                                                                                                                                                                                                                                                                                                                                                                                                                                                                                                                                                                                                                                                                                                                                                                                                                                                                                                                                                                                                                                                                                                                                                                                                                                                                                                                                                                                                                                                                                                                                                                                                                                                                                                                                                                                                                                                                                                                                                                                                                                                                                                                                                              |  |                |   |               |      |            |               |       |              |               |      |            |               |       |             |          |      |  |  |                         |  |               |     |    |               |     |    |               |     |    |               |     |    |          |     |    |  |         |  |               |        |             |               |        |              |               |        |            |               |        |              |          |       |  |  |                |   |               |       |              |               |       |              |               |      |              |               |       |              |          |      |  |  |                         |  |               |       |             |               |       |             |               |       |             |               |       |             |          |       |  |
| <i>IVVTE2</i>                                                                                                                                                     | +11.4                                                                                                                                                                                                                                                                                                                                                                                                                                                                                                                                                                                                                                                                                                                                                                                                                                                                                                                                                                                                                                                                                                                                                                                                                                                                                                                                                                                                                                                                                                                                                                                                                                                                                                                                                                                                                                                                                                                                                                                                                                                                                                                                                                                                                                                                                                                                                                                                                                                                                                                                                                                                                                                                                                                      | <0.0001 vs L                                                                                                                                                                                                                                                                                                                                                                                                                                                                                                            |                                                                                                                                                                                                                                                                                                                                                                                                                                                                                                                                                                                                                                                                                                                                                                                                                                                                                                                                                                                                                                                                                                                                                                                                                                                                                                                                                                                                                                                                                                                                                                                                                                                                                                                                                                                                                                                                                                                                                                                                                                                                                                                                                                                                                                                              |  |                |   |               |      |            |               |       |              |               |      |            |               |       |             |          |      |  |  |                         |  |               |     |    |               |     |    |               |     |    |               |     |    |          |     |    |  |         |  |               |        |             |               |        |              |               |        |            |               |        |              |          |       |  |  |                |   |               |       |              |               |       |              |               |      |              |               |       |              |          |      |  |  |                         |  |               |       |             |               |       |             |               |       |             |               |       |             |          |       |  |
| <i>IVVTE3</i>                                                                                                                                                     | +8.5                                                                                                                                                                                                                                                                                                                                                                                                                                                                                                                                                                                                                                                                                                                                                                                                                                                                                                                                                                                                                                                                                                                                                                                                                                                                                                                                                                                                                                                                                                                                                                                                                                                                                                                                                                                                                                                                                                                                                                                                                                                                                                                                                                                                                                                                                                                                                                                                                                                                                                                                                                                                                                                                                                                       | 0.008 vs L                                                                                                                                                                                                                                                                                                                                                                                                                                                                                                              |                                                                                                                                                                                                                                                                                                                                                                                                                                                                                                                                                                                                                                                                                                                                                                                                                                                                                                                                                                                                                                                                                                                                                                                                                                                                                                                                                                                                                                                                                                                                                                                                                                                                                                                                                                                                                                                                                                                                                                                                                                                                                                                                                                                                                                                              |  |                |   |               |      |            |               |       |              |               |      |            |               |       |             |          |      |  |  |                         |  |               |     |    |               |     |    |               |     |    |               |     |    |          |     |    |  |         |  |               |        |             |               |        |              |               |        |            |               |        |              |          |       |  |  |                |   |               |       |              |               |       |              |               |      |              |               |       |              |          |      |  |  |                         |  |               |       |             |               |       |             |               |       |             |               |       |             |          |       |  |
| <i>IVVTE3</i>                                                                                                                                                     | +10.3                                                                                                                                                                                                                                                                                                                                                                                                                                                                                                                                                                                                                                                                                                                                                                                                                                                                                                                                                                                                                                                                                                                                                                                                                                                                                                                                                                                                                                                                                                                                                                                                                                                                                                                                                                                                                                                                                                                                                                                                                                                                                                                                                                                                                                                                                                                                                                                                                                                                                                                                                                                                                                                                                                                      | 0.0004 vs L                                                                                                                                                                                                                                                                                                                                                                                                                                                                                                             |                                                                                                                                                                                                                                                                                                                                                                                                                                                                                                                                                                                                                                                                                                                                                                                                                                                                                                                                                                                                                                                                                                                                                                                                                                                                                                                                                                                                                                                                                                                                                                                                                                                                                                                                                                                                                                                                                                                                                                                                                                                                                                                                                                                                                                                              |  |                |   |               |      |            |               |       |              |               |      |            |               |       |             |          |      |  |  |                         |  |               |     |    |               |     |    |               |     |    |               |     |    |          |     |    |  |         |  |               |        |             |               |        |              |               |        |            |               |        |              |          |       |  |  |                |   |               |       |              |               |       |              |               |      |              |               |       |              |          |      |  |  |                         |  |               |       |             |               |       |             |               |       |             |               |       |             |          |       |  |
| <i>L</i>                                                                                                                                                          | +2.5                                                                                                                                                                                                                                                                                                                                                                                                                                                                                                                                                                                                                                                                                                                                                                                                                                                                                                                                                                                                                                                                                                                                                                                                                                                                                                                                                                                                                                                                                                                                                                                                                                                                                                                                                                                                                                                                                                                                                                                                                                                                                                                                                                                                                                                                                                                                                                                                                                                                                                                                                                                                                                                                                                                       |                                                                                                                                                                                                                                                                                                                                                                                                                                                                                                                         |                                                                                                                                                                                                                                                                                                                                                                                                                                                                                                                                                                                                                                                                                                                                                                                                                                                                                                                                                                                                                                                                                                                                                                                                                                                                                                                                                                                                                                                                                                                                                                                                                                                                                                                                                                                                                                                                                                                                                                                                                                                                                                                                                                                                                                                              |  |                |   |               |      |            |               |       |              |               |      |            |               |       |             |          |      |  |  |                         |  |               |     |    |               |     |    |               |     |    |               |     |    |          |     |    |  |         |  |               |        |             |               |        |              |               |        |            |               |        |              |          |       |  |  |                |   |               |       |              |               |       |              |               |      |              |               |       |              |          |      |  |  |                         |  |               |       |             |               |       |             |               |       |             |               |       |             |          |       |  |
|                                                                                                                                                                   | <b>plus ≥10 letters</b>                                                                                                                                                                                                                                                                                                                                                                                                                                                                                                                                                                                                                                                                                                                                                                                                                                                                                                                                                                                                                                                                                                                                                                                                                                                                                                                                                                                                                                                                                                                                                                                                                                                                                                                                                                                                                                                                                                                                                                                                                                                                                                                                                                                                                                                                                                                                                                                                                                                                                                                                                                                                                                                                                                    |                                                                                                                                                                                                                                                                                                                                                                                                                                                                                                                         |                                                                                                                                                                                                                                                                                                                                                                                                                                                                                                                                                                                                                                                                                                                                                                                                                                                                                                                                                                                                                                                                                                                                                                                                                                                                                                                                                                                                                                                                                                                                                                                                                                                                                                                                                                                                                                                                                                                                                                                                                                                                                                                                                                                                                                                              |  |                |   |               |      |            |               |       |              |               |      |            |               |       |             |          |      |  |  |                         |  |               |     |    |               |     |    |               |     |    |               |     |    |          |     |    |  |         |  |               |        |             |               |        |              |               |        |            |               |        |              |          |       |  |  |                |   |               |       |              |               |       |              |               |      |              |               |       |              |          |      |  |  |                         |  |               |       |             |               |       |             |               |       |             |               |       |             |          |       |  |
| <i>IVVTE1</i>                                                                                                                                                     | 50%                                                                                                                                                                                                                                                                                                                                                                                                                                                                                                                                                                                                                                                                                                                                                                                                                                                                                                                                                                                                                                                                                                                                                                                                                                                                                                                                                                                                                                                                                                                                                                                                                                                                                                                                                                                                                                                                                                                                                                                                                                                                                                                                                                                                                                                                                                                                                                                                                                                                                                                                                                                                                                                                                                                        | NR                                                                                                                                                                                                                                                                                                                                                                                                                                                                                                                      |                                                                                                                                                                                                                                                                                                                                                                                                                                                                                                                                                                                                                                                                                                                                                                                                                                                                                                                                                                                                                                                                                                                                                                                                                                                                                                                                                                                                                                                                                                                                                                                                                                                                                                                                                                                                                                                                                                                                                                                                                                                                                                                                                                                                                                                              |  |                |   |               |      |            |               |       |              |               |      |            |               |       |             |          |      |  |  |                         |  |               |     |    |               |     |    |               |     |    |               |     |    |          |     |    |  |         |  |               |        |             |               |        |              |               |        |            |               |        |              |          |       |  |  |                |   |               |       |              |               |       |              |               |      |              |               |       |              |          |      |  |  |                         |  |               |       |             |               |       |             |               |       |             |               |       |             |          |       |  |
| <i>IVVTE2</i>                                                                                                                                                     | 64%                                                                                                                                                                                                                                                                                                                                                                                                                                                                                                                                                                                                                                                                                                                                                                                                                                                                                                                                                                                                                                                                                                                                                                                                                                                                                                                                                                                                                                                                                                                                                                                                                                                                                                                                                                                                                                                                                                                                                                                                                                                                                                                                                                                                                                                                                                                                                                                                                                                                                                                                                                                                                                                                                                                        | NR                                                                                                                                                                                                                                                                                                                                                                                                                                                                                                                      |                                                                                                                                                                                                                                                                                                                                                                                                                                                                                                                                                                                                                                                                                                                                                                                                                                                                                                                                                                                                                                                                                                                                                                                                                                                                                                                                                                                                                                                                                                                                                                                                                                                                                                                                                                                                                                                                                                                                                                                                                                                                                                                                                                                                                                                              |  |                |   |               |      |            |               |       |              |               |      |            |               |       |             |          |      |  |  |                         |  |               |     |    |               |     |    |               |     |    |               |     |    |          |     |    |  |         |  |               |        |             |               |        |              |               |        |            |               |        |              |          |       |  |  |                |   |               |       |              |               |       |              |               |      |              |               |       |              |          |      |  |  |                         |  |               |       |             |               |       |             |               |       |             |               |       |             |          |       |  |
| <i>IVVTE3</i>                                                                                                                                                     | 43%                                                                                                                                                                                                                                                                                                                                                                                                                                                                                                                                                                                                                                                                                                                                                                                                                                                                                                                                                                                                                                                                                                                                                                                                                                                                                                                                                                                                                                                                                                                                                                                                                                                                                                                                                                                                                                                                                                                                                                                                                                                                                                                                                                                                                                                                                                                                                                                                                                                                                                                                                                                                                                                                                                                        | NR                                                                                                                                                                                                                                                                                                                                                                                                                                                                                                                      |                                                                                                                                                                                                                                                                                                                                                                                                                                                                                                                                                                                                                                                                                                                                                                                                                                                                                                                                                                                                                                                                                                                                                                                                                                                                                                                                                                                                                                                                                                                                                                                                                                                                                                                                                                                                                                                                                                                                                                                                                                                                                                                                                                                                                                                              |  |                |   |               |      |            |               |       |              |               |      |            |               |       |             |          |      |  |  |                         |  |               |     |    |               |     |    |               |     |    |               |     |    |          |     |    |  |         |  |               |        |             |               |        |              |               |        |            |               |        |              |          |       |  |  |                |   |               |       |              |               |       |              |               |      |              |               |       |              |          |      |  |  |                         |  |               |       |             |               |       |             |               |       |             |               |       |             |          |       |  |
| <i>IVVTE3</i>                                                                                                                                                     | 58%                                                                                                                                                                                                                                                                                                                                                                                                                                                                                                                                                                                                                                                                                                                                                                                                                                                                                                                                                                                                                                                                                                                                                                                                                                                                                                                                                                                                                                                                                                                                                                                                                                                                                                                                                                                                                                                                                                                                                                                                                                                                                                                                                                                                                                                                                                                                                                                                                                                                                                                                                                                                                                                                                                                        | NR                                                                                                                                                                                                                                                                                                                                                                                                                                                                                                                      |                                                                                                                                                                                                                                                                                                                                                                                                                                                                                                                                                                                                                                                                                                                                                                                                                                                                                                                                                                                                                                                                                                                                                                                                                                                                                                                                                                                                                                                                                                                                                                                                                                                                                                                                                                                                                                                                                                                                                                                                                                                                                                                                                                                                                                                              |  |                |   |               |      |            |               |       |              |               |      |            |               |       |             |          |      |  |  |                         |  |               |     |    |               |     |    |               |     |    |               |     |    |          |     |    |  |         |  |               |        |             |               |        |              |               |        |            |               |        |              |          |       |  |  |                |   |               |       |              |               |       |              |               |      |              |               |       |              |          |      |  |  |                         |  |               |       |             |               |       |             |               |       |             |               |       |             |          |       |  |
| <i>L</i>                                                                                                                                                          | 32%                                                                                                                                                                                                                                                                                                                                                                                                                                                                                                                                                                                                                                                                                                                                                                                                                                                                                                                                                                                                                                                                                                                                                                                                                                                                                                                                                                                                                                                                                                                                                                                                                                                                                                                                                                                                                                                                                                                                                                                                                                                                                                                                                                                                                                                                                                                                                                                                                                                                                                                                                                                                                                                                                                                        | NR                                                                                                                                                                                                                                                                                                                                                                                                                                                                                                                      |                                                                                                                                                                                                                                                                                                                                                                                                                                                                                                                                                                                                                                                                                                                                                                                                                                                                                                                                                                                                                                                                                                                                                                                                                                                                                                                                                                                                                                                                                                                                                                                                                                                                                                                                                                                                                                                                                                                                                                                                                                                                                                                                                                                                                                                              |  |                |   |               |      |            |               |       |              |               |      |            |               |       |             |          |      |  |  |                         |  |               |     |    |               |     |    |               |     |    |               |     |    |          |     |    |  |         |  |               |        |             |               |        |              |               |        |            |               |        |              |          |       |  |  |                |   |               |       |              |               |       |              |               |      |              |               |       |              |          |      |  |  |                         |  |               |       |             |               |       |             |               |       |             |               |       |             |          |       |  |
|                                                                                                                                                                   | CMT(um)                                                                                                                                                                                                                                                                                                                                                                                                                                                                                                                                                                                                                                                                                                                                                                                                                                                                                                                                                                                                                                                                                                                                                                                                                                                                                                                                                                                                                                                                                                                                                                                                                                                                                                                                                                                                                                                                                                                                                                                                                                                                                                                                                                                                                                                                                                                                                                                                                                                                                                                                                                                                                                                                                                                    |                                                                                                                                                                                                                                                                                                                                                                                                                                                                                                                         |                                                                                                                                                                                                                                                                                                                                                                                                                                                                                                                                                                                                                                                                                                                                                                                                                                                                                                                                                                                                                                                                                                                                                                                                                                                                                                                                                                                                                                                                                                                                                                                                                                                                                                                                                                                                                                                                                                                                                                                                                                                                                                                                                                                                                                                              |  |                |   |               |      |            |               |       |              |               |      |            |               |       |             |          |      |  |  |                         |  |               |     |    |               |     |    |               |     |    |               |     |    |          |     |    |  |         |  |               |        |             |               |        |              |               |        |            |               |        |              |          |       |  |  |                |   |               |       |              |               |       |              |               |      |              |               |       |              |          |      |  |  |                         |  |               |       |             |               |       |             |               |       |             |               |       |             |          |       |  |
| <i>IVVTE1</i>                                                                                                                                                     | -144.6                                                                                                                                                                                                                                                                                                                                                                                                                                                                                                                                                                                                                                                                                                                                                                                                                                                                                                                                                                                                                                                                                                                                                                                                                                                                                                                                                                                                                                                                                                                                                                                                                                                                                                                                                                                                                                                                                                                                                                                                                                                                                                                                                                                                                                                                                                                                                                                                                                                                                                                                                                                                                                                                                                                     | 0.0002 vs L                                                                                                                                                                                                                                                                                                                                                                                                                                                                                                             |                                                                                                                                                                                                                                                                                                                                                                                                                                                                                                                                                                                                                                                                                                                                                                                                                                                                                                                                                                                                                                                                                                                                                                                                                                                                                                                                                                                                                                                                                                                                                                                                                                                                                                                                                                                                                                                                                                                                                                                                                                                                                                                                                                                                                                                              |  |                |   |               |      |            |               |       |              |               |      |            |               |       |             |          |      |  |  |                         |  |               |     |    |               |     |    |               |     |    |               |     |    |          |     |    |  |         |  |               |        |             |               |        |              |               |        |            |               |        |              |          |       |  |  |                |   |               |       |              |               |       |              |               |      |              |               |       |              |          |      |  |  |                         |  |               |       |             |               |       |             |               |       |             |               |       |             |          |       |  |
| <i>IVVTE2</i>                                                                                                                                                     | -194.5                                                                                                                                                                                                                                                                                                                                                                                                                                                                                                                                                                                                                                                                                                                                                                                                                                                                                                                                                                                                                                                                                                                                                                                                                                                                                                                                                                                                                                                                                                                                                                                                                                                                                                                                                                                                                                                                                                                                                                                                                                                                                                                                                                                                                                                                                                                                                                                                                                                                                                                                                                                                                                                                                                                     | <0.0001 vs L                                                                                                                                                                                                                                                                                                                                                                                                                                                                                                            |                                                                                                                                                                                                                                                                                                                                                                                                                                                                                                                                                                                                                                                                                                                                                                                                                                                                                                                                                                                                                                                                                                                                                                                                                                                                                                                                                                                                                                                                                                                                                                                                                                                                                                                                                                                                                                                                                                                                                                                                                                                                                                                                                                                                                                                              |  |                |   |               |      |            |               |       |              |               |      |            |               |       |             |          |      |  |  |                         |  |               |     |    |               |     |    |               |     |    |               |     |    |          |     |    |  |         |  |               |        |             |               |        |              |               |        |            |               |        |              |          |       |  |  |                |   |               |       |              |               |       |              |               |      |              |               |       |              |          |      |  |  |                         |  |               |       |             |               |       |             |               |       |             |               |       |             |          |       |  |
| <i>IVVTE3</i>                                                                                                                                                     | -127.3                                                                                                                                                                                                                                                                                                                                                                                                                                                                                                                                                                                                                                                                                                                                                                                                                                                                                                                                                                                                                                                                                                                                                                                                                                                                                                                                                                                                                                                                                                                                                                                                                                                                                                                                                                                                                                                                                                                                                                                                                                                                                                                                                                                                                                                                                                                                                                                                                                                                                                                                                                                                                                                                                                                     | 0.007 vs L                                                                                                                                                                                                                                                                                                                                                                                                                                                                                                              |                                                                                                                                                                                                                                                                                                                                                                                                                                                                                                                                                                                                                                                                                                                                                                                                                                                                                                                                                                                                                                                                                                                                                                                                                                                                                                                                                                                                                                                                                                                                                                                                                                                                                                                                                                                                                                                                                                                                                                                                                                                                                                                                                                                                                                                              |  |                |   |               |      |            |               |       |              |               |      |            |               |       |             |          |      |  |  |                         |  |               |     |    |               |     |    |               |     |    |               |     |    |          |     |    |  |         |  |               |        |             |               |        |              |               |        |            |               |        |              |          |       |  |  |                |   |               |       |              |               |       |              |               |      |              |               |       |              |          |      |  |  |                         |  |               |       |             |               |       |             |               |       |             |               |       |             |          |       |  |
| <i>IVVTE3</i>                                                                                                                                                     | -153.3                                                                                                                                                                                                                                                                                                                                                                                                                                                                                                                                                                                                                                                                                                                                                                                                                                                                                                                                                                                                                                                                                                                                                                                                                                                                                                                                                                                                                                                                                                                                                                                                                                                                                                                                                                                                                                                                                                                                                                                                                                                                                                                                                                                                                                                                                                                                                                                                                                                                                                                                                                                                                                                                                                                     | <0.0001 vs L                                                                                                                                                                                                                                                                                                                                                                                                                                                                                                            |                                                                                                                                                                                                                                                                                                                                                                                                                                                                                                                                                                                                                                                                                                                                                                                                                                                                                                                                                                                                                                                                                                                                                                                                                                                                                                                                                                                                                                                                                                                                                                                                                                                                                                                                                                                                                                                                                                                                                                                                                                                                                                                                                                                                                                                              |  |                |   |               |      |            |               |       |              |               |      |            |               |       |             |          |      |  |  |                         |  |               |     |    |               |     |    |               |     |    |               |     |    |          |     |    |  |         |  |               |        |             |               |        |              |               |        |            |               |        |              |          |       |  |  |                |   |               |       |              |               |       |              |               |      |              |               |       |              |          |      |  |  |                         |  |               |       |             |               |       |             |               |       |             |               |       |             |          |       |  |
| <i>L</i>                                                                                                                                                          | -67.9                                                                                                                                                                                                                                                                                                                                                                                                                                                                                                                                                                                                                                                                                                                                                                                                                                                                                                                                                                                                                                                                                                                                                                                                                                                                                                                                                                                                                                                                                                                                                                                                                                                                                                                                                                                                                                                                                                                                                                                                                                                                                                                                                                                                                                                                                                                                                                                                                                                                                                                                                                                                                                                                                                                      |                                                                                                                                                                                                                                                                                                                                                                                                                                                                                                                         |                                                                                                                                                                                                                                                                                                                                                                                                                                                                                                                                                                                                                                                                                                                                                                                                                                                                                                                                                                                                                                                                                                                                                                                                                                                                                                                                                                                                                                                                                                                                                                                                                                                                                                                                                                                                                                                                                                                                                                                                                                                                                                                                                                                                                                                              |  |                |   |               |      |            |               |       |              |               |      |            |               |       |             |          |      |  |  |                         |  |               |     |    |               |     |    |               |     |    |               |     |    |          |     |    |  |         |  |               |        |             |               |        |              |               |        |            |               |        |              |          |       |  |  |                |   |               |       |              |               |       |              |               |      |              |               |       |              |          |      |  |  |                         |  |               |       |             |               |       |             |               |       |             |               |       |             |          |       |  |
|                                                                                                                                                                   | BCVA (letters)                                                                                                                                                                                                                                                                                                                                                                                                                                                                                                                                                                                                                                                                                                                                                                                                                                                                                                                                                                                                                                                                                                                                                                                                                                                                                                                                                                                                                                                                                                                                                                                                                                                                                                                                                                                                                                                                                                                                                                                                                                                                                                                                                                                                                                                                                                                                                                                                                                                                                                                                                                                                                                                                                                             | p                                                                                                                                                                                                                                                                                                                                                                                                                                                                                                                       |                                                                                                                                                                                                                                                                                                                                                                                                                                                                                                                                                                                                                                                                                                                                                                                                                                                                                                                                                                                                                                                                                                                                                                                                                                                                                                                                                                                                                                                                                                                                                                                                                                                                                                                                                                                                                                                                                                                                                                                                                                                                                                                                                                                                                                                              |  |                |   |               |      |            |               |       |              |               |      |            |               |       |             |          |      |  |  |                         |  |               |     |    |               |     |    |               |     |    |               |     |    |          |     |    |  |         |  |               |        |             |               |        |              |               |        |            |               |        |              |          |       |  |  |                |   |               |       |              |               |       |              |               |      |              |               |       |              |          |      |  |  |                         |  |               |       |             |               |       |             |               |       |             |               |       |             |          |       |  |
| <i>IVVTE1</i>                                                                                                                                                     | +11.0                                                                                                                                                                                                                                                                                                                                                                                                                                                                                                                                                                                                                                                                                                                                                                                                                                                                                                                                                                                                                                                                                                                                                                                                                                                                                                                                                                                                                                                                                                                                                                                                                                                                                                                                                                                                                                                                                                                                                                                                                                                                                                                                                                                                                                                                                                                                                                                                                                                                                                                                                                                                                                                                                                                      | ≤0.0001 vs L                                                                                                                                                                                                                                                                                                                                                                                                                                                                                                            |                                                                                                                                                                                                                                                                                                                                                                                                                                                                                                                                                                                                                                                                                                                                                                                                                                                                                                                                                                                                                                                                                                                                                                                                                                                                                                                                                                                                                                                                                                                                                                                                                                                                                                                                                                                                                                                                                                                                                                                                                                                                                                                                                                                                                                                              |  |                |   |               |      |            |               |       |              |               |      |            |               |       |             |          |      |  |  |                         |  |               |     |    |               |     |    |               |     |    |               |     |    |          |     |    |  |         |  |               |        |             |               |        |              |               |        |            |               |        |              |          |       |  |  |                |   |               |       |              |               |       |              |               |      |              |               |       |              |          |      |  |  |                         |  |               |       |             |               |       |             |               |       |             |               |       |             |          |       |  |
| <i>IVVTE2</i>                                                                                                                                                     | +13.1                                                                                                                                                                                                                                                                                                                                                                                                                                                                                                                                                                                                                                                                                                                                                                                                                                                                                                                                                                                                                                                                                                                                                                                                                                                                                                                                                                                                                                                                                                                                                                                                                                                                                                                                                                                                                                                                                                                                                                                                                                                                                                                                                                                                                                                                                                                                                                                                                                                                                                                                                                                                                                                                                                                      | ≤0.0001 vs L                                                                                                                                                                                                                                                                                                                                                                                                                                                                                                            |                                                                                                                                                                                                                                                                                                                                                                                                                                                                                                                                                                                                                                                                                                                                                                                                                                                                                                                                                                                                                                                                                                                                                                                                                                                                                                                                                                                                                                                                                                                                                                                                                                                                                                                                                                                                                                                                                                                                                                                                                                                                                                                                                                                                                                                              |  |                |   |               |      |            |               |       |              |               |      |            |               |       |             |          |      |  |  |                         |  |               |     |    |               |     |    |               |     |    |               |     |    |          |     |    |  |         |  |               |        |             |               |        |              |               |        |            |               |        |              |          |       |  |  |                |   |               |       |              |               |       |              |               |      |              |               |       |              |          |      |  |  |                         |  |               |       |             |               |       |             |               |       |             |               |       |             |          |       |  |
| <i>IVVTE3</i>                                                                                                                                                     | +9.7                                                                                                                                                                                                                                                                                                                                                                                                                                                                                                                                                                                                                                                                                                                                                                                                                                                                                                                                                                                                                                                                                                                                                                                                                                                                                                                                                                                                                                                                                                                                                                                                                                                                                                                                                                                                                                                                                                                                                                                                                                                                                                                                                                                                                                                                                                                                                                                                                                                                                                                                                                                                                                                                                                                       | ≤0.0001 vs L                                                                                                                                                                                                                                                                                                                                                                                                                                                                                                            |                                                                                                                                                                                                                                                                                                                                                                                                                                                                                                                                                                                                                                                                                                                                                                                                                                                                                                                                                                                                                                                                                                                                                                                                                                                                                                                                                                                                                                                                                                                                                                                                                                                                                                                                                                                                                                                                                                                                                                                                                                                                                                                                                                                                                                                              |  |                |   |               |      |            |               |       |              |               |      |            |               |       |             |          |      |  |  |                         |  |               |     |    |               |     |    |               |     |    |               |     |    |          |     |    |  |         |  |               |        |             |               |        |              |               |        |            |               |        |              |          |       |  |  |                |   |               |       |              |               |       |              |               |      |              |               |       |              |          |      |  |  |                         |  |               |       |             |               |       |             |               |       |             |               |       |             |          |       |  |
| <i>IVVTE3</i>                                                                                                                                                     | +12.0                                                                                                                                                                                                                                                                                                                                                                                                                                                                                                                                                                                                                                                                                                                                                                                                                                                                                                                                                                                                                                                                                                                                                                                                                                                                                                                                                                                                                                                                                                                                                                                                                                                                                                                                                                                                                                                                                                                                                                                                                                                                                                                                                                                                                                                                                                                                                                                                                                                                                                                                                                                                                                                                                                                      | ≤0.0001 vs L                                                                                                                                                                                                                                                                                                                                                                                                                                                                                                            |                                                                                                                                                                                                                                                                                                                                                                                                                                                                                                                                                                                                                                                                                                                                                                                                                                                                                                                                                                                                                                                                                                                                                                                                                                                                                                                                                                                                                                                                                                                                                                                                                                                                                                                                                                                                                                                                                                                                                                                                                                                                                                                                                                                                                                                              |  |                |   |               |      |            |               |       |              |               |      |            |               |       |             |          |      |  |  |                         |  |               |     |    |               |     |    |               |     |    |               |     |    |          |     |    |  |         |  |               |        |             |               |        |              |               |        |            |               |        |              |          |       |  |  |                |   |               |       |              |               |       |              |               |      |              |               |       |              |          |      |  |  |                         |  |               |       |             |               |       |             |               |       |             |               |       |             |          |       |  |
| <i>L</i>                                                                                                                                                          | -1.3                                                                                                                                                                                                                                                                                                                                                                                                                                                                                                                                                                                                                                                                                                                                                                                                                                                                                                                                                                                                                                                                                                                                                                                                                                                                                                                                                                                                                                                                                                                                                                                                                                                                                                                                                                                                                                                                                                                                                                                                                                                                                                                                                                                                                                                                                                                                                                                                                                                                                                                                                                                                                                                                                                                       |                                                                                                                                                                                                                                                                                                                                                                                                                                                                                                                         |                                                                                                                                                                                                                                                                                                                                                                                                                                                                                                                                                                                                                                                                                                                                                                                                                                                                                                                                                                                                                                                                                                                                                                                                                                                                                                                                                                                                                                                                                                                                                                                                                                                                                                                                                                                                                                                                                                                                                                                                                                                                                                                                                                                                                                                              |  |                |   |               |      |            |               |       |              |               |      |            |               |       |             |          |      |  |  |                         |  |               |     |    |               |     |    |               |     |    |               |     |    |          |     |    |  |         |  |               |        |             |               |        |              |               |        |            |               |        |              |          |       |  |  |                |   |               |       |              |               |       |              |               |      |              |               |       |              |          |      |  |  |                         |  |               |       |             |               |       |             |               |       |             |               |       |             |          |       |  |
|                                                                                                                                                                   | <b>plus ≥15 letters</b>                                                                                                                                                                                                                                                                                                                                                                                                                                                                                                                                                                                                                                                                                                                                                                                                                                                                                                                                                                                                                                                                                                                                                                                                                                                                                                                                                                                                                                                                                                                                                                                                                                                                                                                                                                                                                                                                                                                                                                                                                                                                                                                                                                                                                                                                                                                                                                                                                                                                                                                                                                                                                                                                                                    |                                                                                                                                                                                                                                                                                                                                                                                                                                                                                                                         |                                                                                                                                                                                                                                                                                                                                                                                                                                                                                                                                                                                                                                                                                                                                                                                                                                                                                                                                                                                                                                                                                                                                                                                                                                                                                                                                                                                                                                                                                                                                                                                                                                                                                                                                                                                                                                                                                                                                                                                                                                                                                                                                                                                                                                                              |  |                |   |               |      |            |               |       |              |               |      |            |               |       |             |          |      |  |  |                         |  |               |     |    |               |     |    |               |     |    |               |     |    |          |     |    |  |         |  |               |        |             |               |        |              |               |        |            |               |        |              |          |       |  |  |                |   |               |       |              |               |       |              |               |      |              |               |       |              |          |      |  |  |                         |  |               |       |             |               |       |             |               |       |             |               |       |             |          |       |  |
| <i>IVVTE1</i>                                                                                                                                                     | 40.9%                                                                                                                                                                                                                                                                                                                                                                                                                                                                                                                                                                                                                                                                                                                                                                                                                                                                                                                                                                                                                                                                                                                                                                                                                                                                                                                                                                                                                                                                                                                                                                                                                                                                                                                                                                                                                                                                                                                                                                                                                                                                                                                                                                                                                                                                                                                                                                                                                                                                                                                                                                                                                                                                                                                      | 0.0031 vs L                                                                                                                                                                                                                                                                                                                                                                                                                                                                                                             |                                                                                                                                                                                                                                                                                                                                                                                                                                                                                                                                                                                                                                                                                                                                                                                                                                                                                                                                                                                                                                                                                                                                                                                                                                                                                                                                                                                                                                                                                                                                                                                                                                                                                                                                                                                                                                                                                                                                                                                                                                                                                                                                                                                                                                                              |  |                |   |               |      |            |               |       |              |               |      |            |               |       |             |          |      |  |  |                         |  |               |     |    |               |     |    |               |     |    |               |     |    |          |     |    |  |         |  |               |        |             |               |        |              |               |        |            |               |        |              |          |       |  |  |                |   |               |       |              |               |       |              |               |      |              |               |       |              |          |      |  |  |                         |  |               |       |             |               |       |             |               |       |             |               |       |             |          |       |  |
| <i>IVVTE2</i>                                                                                                                                                     | 45.5%                                                                                                                                                                                                                                                                                                                                                                                                                                                                                                                                                                                                                                                                                                                                                                                                                                                                                                                                                                                                                                                                                                                                                                                                                                                                                                                                                                                                                                                                                                                                                                                                                                                                                                                                                                                                                                                                                                                                                                                                                                                                                                                                                                                                                                                                                                                                                                                                                                                                                                                                                                                                                                                                                                                      | 0.0007 vs L                                                                                                                                                                                                                                                                                                                                                                                                                                                                                                             |                                                                                                                                                                                                                                                                                                                                                                                                                                                                                                                                                                                                                                                                                                                                                                                                                                                                                                                                                                                                                                                                                                                                                                                                                                                                                                                                                                                                                                                                                                                                                                                                                                                                                                                                                                                                                                                                                                                                                                                                                                                                                                                                                                                                                                                              |  |                |   |               |      |            |               |       |              |               |      |            |               |       |             |          |      |  |  |                         |  |               |     |    |               |     |    |               |     |    |               |     |    |          |     |    |  |         |  |               |        |             |               |        |              |               |        |            |               |        |              |          |       |  |  |                |   |               |       |              |               |       |              |               |      |              |               |       |              |          |      |  |  |                         |  |               |       |             |               |       |             |               |       |             |               |       |             |          |       |  |
| <i>IVVTE3</i>                                                                                                                                                     | 23.8%                                                                                                                                                                                                                                                                                                                                                                                                                                                                                                                                                                                                                                                                                                                                                                                                                                                                                                                                                                                                                                                                                                                                                                                                                                                                                                                                                                                                                                                                                                                                                                                                                                                                                                                                                                                                                                                                                                                                                                                                                                                                                                                                                                                                                                                                                                                                                                                                                                                                                                                                                                                                                                                                                                                      | 0.1608 vs L                                                                                                                                                                                                                                                                                                                                                                                                                                                                                                             |                                                                                                                                                                                                                                                                                                                                                                                                                                                                                                                                                                                                                                                                                                                                                                                                                                                                                                                                                                                                                                                                                                                                                                                                                                                                                                                                                                                                                                                                                                                                                                                                                                                                                                                                                                                                                                                                                                                                                                                                                                                                                                                                                                                                                                                              |  |                |   |               |      |            |               |       |              |               |      |            |               |       |             |          |      |  |  |                         |  |               |     |    |               |     |    |               |     |    |               |     |    |          |     |    |  |         |  |               |        |             |               |        |              |               |        |            |               |        |              |          |       |  |  |                |   |               |       |              |               |       |              |               |      |              |               |       |              |          |      |  |  |                         |  |               |       |             |               |       |             |               |       |             |               |       |             |          |       |  |
| <i>IVVTE3</i>                                                                                                                                                     | 42.2%                                                                                                                                                                                                                                                                                                                                                                                                                                                                                                                                                                                                                                                                                                                                                                                                                                                                                                                                                                                                                                                                                                                                                                                                                                                                                                                                                                                                                                                                                                                                                                                                                                                                                                                                                                                                                                                                                                                                                                                                                                                                                                                                                                                                                                                                                                                                                                                                                                                                                                                                                                                                                                                                                                                      | 0.0016 vs L                                                                                                                                                                                                                                                                                                                                                                                                                                                                                                             |                                                                                                                                                                                                                                                                                                                                                                                                                                                                                                                                                                                                                                                                                                                                                                                                                                                                                                                                                                                                                                                                                                                                                                                                                                                                                                                                                                                                                                                                                                                                                                                                                                                                                                                                                                                                                                                                                                                                                                                                                                                                                                                                                                                                                                                              |  |                |   |               |      |            |               |       |              |               |      |            |               |       |             |          |      |  |  |                         |  |               |     |    |               |     |    |               |     |    |               |     |    |          |     |    |  |         |  |               |        |             |               |        |              |               |        |            |               |        |              |          |       |  |  |                |   |               |       |              |               |       |              |               |      |              |               |       |              |          |      |  |  |                         |  |               |       |             |               |       |             |               |       |             |               |       |             |          |       |  |
| <i>L</i>                                                                                                                                                          | 11.4%                                                                                                                                                                                                                                                                                                                                                                                                                                                                                                                                                                                                                                                                                                                                                                                                                                                                                                                                                                                                                                                                                                                                                                                                                                                                                                                                                                                                                                                                                                                                                                                                                                                                                                                                                                                                                                                                                                                                                                                                                                                                                                                                                                                                                                                                                                                                                                                                                                                                                                                                                                                                                                                                                                                      |                                                                                                                                                                                                                                                                                                                                                                                                                                                                                                                         |                                                                                                                                                                                                                                                                                                                                                                                                                                                                                                                                                                                                                                                                                                                                                                                                                                                                                                                                                                                                                                                                                                                                                                                                                                                                                                                                                                                                                                                                                                                                                                                                                                                                                                                                                                                                                                                                                                                                                                                                                                                                                                                                                                                                                                                              |  |                |   |               |      |            |               |       |              |               |      |            |               |       |             |          |      |  |  |                         |  |               |     |    |               |     |    |               |     |    |               |     |    |          |     |    |  |         |  |               |        |             |               |        |              |               |        |            |               |        |              |          |       |  |  |                |   |               |       |              |               |       |              |               |      |              |               |       |              |          |      |  |  |                         |  |               |       |             |               |       |             |               |       |             |               |       |             |          |       |  |

| Study            | Participants and baseline values | Intervention  | Outcome (change from baseline at study end)                                                                                                                                                                                                                                                                                                                                                                                                                                                                                                                                                                                                                                                                                                                                                                                                                   |                  |  |  |               |     |             |               |     |             |               |     |             |               |     |             |          |  |  |         |  |  |               |        |               |               |        |               |               |        |               |               |        |               |          |       |  |
|------------------|----------------------------------|---------------|---------------------------------------------------------------------------------------------------------------------------------------------------------------------------------------------------------------------------------------------------------------------------------------------------------------------------------------------------------------------------------------------------------------------------------------------------------------------------------------------------------------------------------------------------------------------------------------------------------------------------------------------------------------------------------------------------------------------------------------------------------------------------------------------------------------------------------------------------------------|------------------|--|--|---------------|-----|-------------|---------------|-----|-------------|---------------|-----|-------------|---------------|-----|-------------|----------|--|--|---------|--|--|---------------|--------|---------------|---------------|--------|---------------|---------------|--------|---------------|---------------|--------|---------------|----------|-------|--|
|                  |                                  |               | <table border="1"> <thead> <tr> <th colspan="3">plus ≥10 letters</th> </tr> </thead> <tbody> <tr> <td><i>IVVTE1</i></td> <td>57%</td> <td>0.0031 vs L</td> </tr> <tr> <td><i>IVVTE2</i></td> <td>71%</td> <td>0.0007 vs L</td> </tr> <tr> <td><i>IVVTE3</i></td> <td>45%</td> <td>0.1608 vs L</td> </tr> <tr> <td><i>IVVTE3</i></td> <td>62%</td> <td>0.0016 vs L</td> </tr> <tr> <td><i>L</i></td> <td></td> <td></td> </tr> <tr> <th colspan="3">CMT(μm)</th> </tr> <tr> <td><i>IVVTE1</i></td> <td>-165.4</td> <td>&lt; 0.0001 vs L</td> </tr> <tr> <td><i>IVVTE2</i></td> <td>-227.4</td> <td>&lt; 0.0001 vs L</td> </tr> <tr> <td><i>IVVTE3</i></td> <td>-187.8</td> <td>&lt; 0.0001 vs L</td> </tr> <tr> <td><i>IVVTE3</i></td> <td>-180.3</td> <td>&lt; 0.0001 vs L</td> </tr> <tr> <td><i>L</i></td> <td>-58.4</td> <td></td> </tr> </tbody> </table> | plus ≥10 letters |  |  | <i>IVVTE1</i> | 57% | 0.0031 vs L | <i>IVVTE2</i> | 71% | 0.0007 vs L | <i>IVVTE3</i> | 45% | 0.1608 vs L | <i>IVVTE3</i> | 62% | 0.0016 vs L | <i>L</i> |  |  | CMT(μm) |  |  | <i>IVVTE1</i> | -165.4 | < 0.0001 vs L | <i>IVVTE2</i> | -227.4 | < 0.0001 vs L | <i>IVVTE3</i> | -187.8 | < 0.0001 vs L | <i>IVVTE3</i> | -180.3 | < 0.0001 vs L | <i>L</i> | -58.4 |  |
| plus ≥10 letters |                                  |               |                                                                                                                                                                                                                                                                                                                                                                                                                                                                                                                                                                                                                                                                                                                                                                                                                                                               |                  |  |  |               |     |             |               |     |             |               |     |             |               |     |             |          |  |  |         |  |  |               |        |               |               |        |               |               |        |               |               |        |               |          |       |  |
| <i>IVVTE1</i>    | 57%                              | 0.0031 vs L   |                                                                                                                                                                                                                                                                                                                                                                                                                                                                                                                                                                                                                                                                                                                                                                                                                                                               |                  |  |  |               |     |             |               |     |             |               |     |             |               |     |             |          |  |  |         |  |  |               |        |               |               |        |               |               |        |               |               |        |               |          |       |  |
| <i>IVVTE2</i>    | 71%                              | 0.0007 vs L   |                                                                                                                                                                                                                                                                                                                                                                                                                                                                                                                                                                                                                                                                                                                                                                                                                                                               |                  |  |  |               |     |             |               |     |             |               |     |             |               |     |             |          |  |  |         |  |  |               |        |               |               |        |               |               |        |               |               |        |               |          |       |  |
| <i>IVVTE3</i>    | 45%                              | 0.1608 vs L   |                                                                                                                                                                                                                                                                                                                                                                                                                                                                                                                                                                                                                                                                                                                                                                                                                                                               |                  |  |  |               |     |             |               |     |             |               |     |             |               |     |             |          |  |  |         |  |  |               |        |               |               |        |               |               |        |               |               |        |               |          |       |  |
| <i>IVVTE3</i>    | 62%                              | 0.0016 vs L   |                                                                                                                                                                                                                                                                                                                                                                                                                                                                                                                                                                                                                                                                                                                                                                                                                                                               |                  |  |  |               |     |             |               |     |             |               |     |             |               |     |             |          |  |  |         |  |  |               |        |               |               |        |               |               |        |               |               |        |               |          |       |  |
| <i>L</i>         |                                  |               |                                                                                                                                                                                                                                                                                                                                                                                                                                                                                                                                                                                                                                                                                                                                                                                                                                                               |                  |  |  |               |     |             |               |     |             |               |     |             |               |     |             |          |  |  |         |  |  |               |        |               |               |        |               |               |        |               |               |        |               |          |       |  |
| CMT(μm)          |                                  |               |                                                                                                                                                                                                                                                                                                                                                                                                                                                                                                                                                                                                                                                                                                                                                                                                                                                               |                  |  |  |               |     |             |               |     |             |               |     |             |               |     |             |          |  |  |         |  |  |               |        |               |               |        |               |               |        |               |               |        |               |          |       |  |
| <i>IVVTE1</i>    | -165.4                           | < 0.0001 vs L |                                                                                                                                                                                                                                                                                                                                                                                                                                                                                                                                                                                                                                                                                                                                                                                                                                                               |                  |  |  |               |     |             |               |     |             |               |     |             |               |     |             |          |  |  |         |  |  |               |        |               |               |        |               |               |        |               |               |        |               |          |       |  |
| <i>IVVTE2</i>    | -227.4                           | < 0.0001 vs L |                                                                                                                                                                                                                                                                                                                                                                                                                                                                                                                                                                                                                                                                                                                                                                                                                                                               |                  |  |  |               |     |             |               |     |             |               |     |             |               |     |             |          |  |  |         |  |  |               |        |               |               |        |               |               |        |               |               |        |               |          |       |  |
| <i>IVVTE3</i>    | -187.8                           | < 0.0001 vs L |                                                                                                                                                                                                                                                                                                                                                                                                                                                                                                                                                                                                                                                                                                                                                                                                                                                               |                  |  |  |               |     |             |               |     |             |               |     |             |               |     |             |          |  |  |         |  |  |               |        |               |               |        |               |               |        |               |               |        |               |          |       |  |
| <i>IVVTE3</i>    | -180.3                           | < 0.0001 vs L |                                                                                                                                                                                                                                                                                                                                                                                                                                                                                                                                                                                                                                                                                                                                                                                                                                                               |                  |  |  |               |     |             |               |     |             |               |     |             |               |     |             |          |  |  |         |  |  |               |        |               |               |        |               |               |        |               |               |        |               |          |       |  |
| <i>L</i>         | -58.4                            |               |                                                                                                                                                                                                                                                                                                                                                                                                                                                                                                                                                                                                                                                                                                                                                                                                                                                               |                  |  |  |               |     |             |               |     |             |               |     |             |               |     |             |          |  |  |         |  |  |               |        |               |               |        |               |               |        |               |               |        |               |          |       |  |

Abbreviations: See table 2

Table 5: Dexamethasone and fluocinolone studies

| Study                                                                                             | Participants and baseline values                                                                                                                                                                                                                                                                                                                                                                                                   | Intervention                                                                                                                                                                                                                                                                                                                                                                                                                                                              | Outcome (change from baseline at study end)                                                                                                                                                                                                                                                                                                                                                                                                                                                                                                                                                                                                                                                    |  |                  |   |               |             |         |          |     |  |
|---------------------------------------------------------------------------------------------------|------------------------------------------------------------------------------------------------------------------------------------------------------------------------------------------------------------------------------------------------------------------------------------------------------------------------------------------------------------------------------------------------------------------------------------|---------------------------------------------------------------------------------------------------------------------------------------------------------------------------------------------------------------------------------------------------------------------------------------------------------------------------------------------------------------------------------------------------------------------------------------------------------------------------|------------------------------------------------------------------------------------------------------------------------------------------------------------------------------------------------------------------------------------------------------------------------------------------------------------------------------------------------------------------------------------------------------------------------------------------------------------------------------------------------------------------------------------------------------------------------------------------------------------------------------------------------------------------------------------------------|--|------------------|---|---------------|-------------|---------|----------|-----|--|
| <i>Dexamethasone</i>                                                                              |                                                                                                                                                                                                                                                                                                                                                                                                                                    |                                                                                                                                                                                                                                                                                                                                                                                                                                                                           |                                                                                                                                                                                                                                                                                                                                                                                                                                                                                                                                                                                                                                                                                                |  |                  |   |               |             |         |          |     |  |
| <p><b>Callanan 2011USA</b>[44]<br/> <b>Design:</b> 2-arm RCT<br/> <b>Follow-up:</b> 12 months</p> | <p><b>N:</b> 253 eyes of 253 patients<br/> <b>Inclusion criteria:</b> diffuse DMO, CMT ≥275 μm, BCVA ≥34 and ≤70 letters<br/> <b>Exclusion criteria:</b> not reported<br/> <b>Age:</b> not reported<br/> <b>Sex:</b> not reported<br/> <b>Diabetes type:</b> not reported<br/> <b>HbA1c:</b> not reported<br/> <b>Baseline VA:</b> not reported<br/> <b>Baseline CMT:</b> not reported<br/> <b>Comorbidities:</b> not reported</p> | <p><b>Group 1 (DIL, n=126 eyes):</b> dexamethasone IV implant followed by laser photocoagulation after 1 month (mean 1.6 implants; 78.6% completion)<br/> <b>Group 2 (L, n=127 eyes):</b> laser alone (79.5% completion)<br/> <b>Regimen for all groups:</b> if needed, patients were retreated with the dexamethasone implant at months 6 or 9, and with laser at months 4, 7, and 10; mean 2.2 laser treatments per patient<br/> <b>Laser protocol</b> not reported</p> | <p><b>At 12 months</b><br/> <b>BCVA:</b></p> <table border="1"> <thead> <tr> <th></th> <th>plus ≥10 letters</th> <th>p</th> </tr> </thead> <tbody> <tr> <td><i>DIL</i></td> <td>28%</td> <td>NS vs L</td> </tr> <tr> <td><i>L</i></td> <td>24%</td> <td></td> </tr> </tbody> </table> <ul style="list-style-type: none"> <li>patients in DIL group had significantly greater increases in BCVA from baseline than patients in the laser group (p&lt;0.05) at months 1 to 9 only</li> </ul> <p><b>CMT (OCT):</b></p> <ul style="list-style-type: none"> <li>patients in DIL group had significantly greater mean reductions from baseline in CMT at months 1 and 6 only (p&lt;0.001)</li> </ul> |  | plus ≥10 letters | p | <i>DIL</i>    | 28%         | NS vs L | <i>L</i> | 24% |  |
|                                                                                                   | plus ≥10 letters                                                                                                                                                                                                                                                                                                                                                                                                                   | p                                                                                                                                                                                                                                                                                                                                                                                                                                                                         |                                                                                                                                                                                                                                                                                                                                                                                                                                                                                                                                                                                                                                                                                                |  |                  |   |               |             |         |          |     |  |
| <i>DIL</i>                                                                                        | 28%                                                                                                                                                                                                                                                                                                                                                                                                                                | NS vs L                                                                                                                                                                                                                                                                                                                                                                                                                                                                   |                                                                                                                                                                                                                                                                                                                                                                                                                                                                                                                                                                                                                                                                                                |  |                  |   |               |             |         |          |     |  |
| <i>L</i>                                                                                          | 24%                                                                                                                                                                                                                                                                                                                                                                                                                                |                                                                                                                                                                                                                                                                                                                                                                                                                                                                           |                                                                                                                                                                                                                                                                                                                                                                                                                                                                                                                                                                                                                                                                                                |  |                  |   |               |             |         |          |     |  |
| <p><b>Haller 2010</b>[59]<br/> <b>USA</b><br/>                     Multicenter</p>                | <p><b>N:</b> 171 eyes of 171 patients<br/> <b>Inclusion criteria:</b> ≥12 years, DMO persisting for ≥90 days after laser treatment or medical therapy, BCVA by ETDRS between 20/40 (67 letters) and 20/200 (35 letters) due to</p>                                                                                                                                                                                                 | <p><b>Group 1 (DDS350, n=57 eyes):</b> 350 μg dexamethasone IV drug delivery system, implanted into the vitreous cavity</p>                                                                                                                                                                                                                                                                                                                                               | <p><b>At 90 days</b><br/> <b>BCVA (ETDRS):</b></p> <table border="1"> <thead> <tr> <th></th> <th>plus ≥10 letters</th> <th>p</th> </tr> </thead> <tbody> <tr> <td><i>DDS350</i></td> <td>21% [graph]</td> <td>NS vs C</td> </tr> </tbody> </table>                                                                                                                                                                                                                                                                                                                                                                                                                                             |  | plus ≥10 letters | p | <i>DDS350</i> | 21% [graph] | NS vs C |          |     |  |
|                                                                                                   | plus ≥10 letters                                                                                                                                                                                                                                                                                                                                                                                                                   | p                                                                                                                                                                                                                                                                                                                                                                                                                                                                         |                                                                                                                                                                                                                                                                                                                                                                                                                                                                                                                                                                                                                                                                                                |  |                  |   |               |             |         |          |     |  |
| <i>DDS350</i>                                                                                     | 21% [graph]                                                                                                                                                                                                                                                                                                                                                                                                                        | NS vs C                                                                                                                                                                                                                                                                                                                                                                                                                                                                   |                                                                                                                                                                                                                                                                                                                                                                                                                                                                                                                                                                                                                                                                                                |  |                  |   |               |             |         |          |     |  |

| Study                                                                                                                                                                                                                                                 | Participants and baseline values                                                                                                                                                                                                                                                                                                                                                                                                                                                                                                                                                                                                                                                                                                                                                                                                                                                                                                       | Intervention                                                                                                                                                                                                                                                                                                                                                                                                                                                                                                                                                                                                                                                                                                                                                                                                                                            | Outcome (change from baseline at study end)                                                                                                                                                                                                                                                                                                                                                                                                                                                                                                                                                                                                                                                                                                                                                                                                                                                                                                                                                                                                                                                                                                                                                                                                                                                                                |  |                |   |                |                |                  |                |                  |             |          |                |  |                |                        |                 |                |             |         |               |             |         |          |                |   |                |        |            |                |        |             |          |        |  |
|-------------------------------------------------------------------------------------------------------------------------------------------------------------------------------------------------------------------------------------------------------|----------------------------------------------------------------------------------------------------------------------------------------------------------------------------------------------------------------------------------------------------------------------------------------------------------------------------------------------------------------------------------------------------------------------------------------------------------------------------------------------------------------------------------------------------------------------------------------------------------------------------------------------------------------------------------------------------------------------------------------------------------------------------------------------------------------------------------------------------------------------------------------------------------------------------------------|---------------------------------------------------------------------------------------------------------------------------------------------------------------------------------------------------------------------------------------------------------------------------------------------------------------------------------------------------------------------------------------------------------------------------------------------------------------------------------------------------------------------------------------------------------------------------------------------------------------------------------------------------------------------------------------------------------------------------------------------------------------------------------------------------------------------------------------------------------|----------------------------------------------------------------------------------------------------------------------------------------------------------------------------------------------------------------------------------------------------------------------------------------------------------------------------------------------------------------------------------------------------------------------------------------------------------------------------------------------------------------------------------------------------------------------------------------------------------------------------------------------------------------------------------------------------------------------------------------------------------------------------------------------------------------------------------------------------------------------------------------------------------------------------------------------------------------------------------------------------------------------------------------------------------------------------------------------------------------------------------------------------------------------------------------------------------------------------------------------------------------------------------------------------------------------------|--|----------------|---|----------------|----------------|------------------|----------------|------------------|-------------|----------|----------------|--|----------------|------------------------|-----------------|----------------|-------------|---------|---------------|-------------|---------|----------|----------------|---|----------------|--------|------------|----------------|--------|-------------|----------|--------|--|
| <p><b>Design:</b> 3-arm RCT<br/><b>Follow-up:</b> 6 months (180 days), primary outcome 3 months (90 days)</p>                                                                                                                                         | <p>clinically detectable DMO; analysis includes only eyes with DMO associated with DR<br/><b>Exclusion criteria:</b> history of vitrectomy in the study eye; use of systemic, periocular, or intraocular steroids within 30 days of enrollment; moderate or severe glaucoma in the study eye; poorly controlled hypertension (SP &gt;160 mmHg or DP &gt;90 mmHg); poorly controlled diabetes (HbA1c &gt;13%)<br/><b>Age:</b> 62.9 to 63.8 years SD10.2 to 12.0<br/><b>Sex:</b> 45.6 to 49.1% female<br/><b>Diabetes type:</b> not reported<br/><b>HbA1c:</b> 7.3 to 7.6%<br/><b>Baseline VA:</b> letter score 54.4 to 54.7 SD9.96 to 11.88<br/><b>Baseline CMT:</b> 417.5 to 446.5 <math>\mu</math>m SD123.7 to 155.9<br/><b>Comorbidities:</b> 19 to 21% prior cataract extraction</p>                                                                                                                                                | <p><b>Group 2 (DDS700, n=57 eyes):</b> 700 <math>\mu</math>g dexamethasone IV drug delivery system, implanted into the vitreous cavity<br/><b>Group 3 (C, n=57 eyes):</b> no treatment<br/><b>Regimen for all groups:</b> eyes demonstrating a VA loss of <math>\geq</math>5 letters could be treated with any other therapy (including laser photocoagulation and IV triamcinolone) (n=4 with photocoagulation or IV triamcinolone in the C group, n=2 in the DDS350 group, none in the DDS700 group)</p>                                                                                                                                                                                                                                                                                                                                              | <p><b>DDS700</b> 33% 0.007 vs C<br/><b>C</b> 12%</p> <p><b>CMT (OCT):</b></p> <table border="1"> <thead> <tr> <th></th> <th>CMT (<math>\mu</math>m)</th> <th>p</th> </tr> </thead> <tbody> <tr> <td><b>DDS350</b></td> <td>-42.57 SD95.96</td> <td>NS (p=0.07) vs C</td> </tr> <tr> <td><b>DDS700</b></td> <td>-132.27 SD160.86</td> <td>&lt;0.001 vs C</td> </tr> <tr> <td><b>C</b></td> <td>+30.21 SD82.12</td> <td></td> </tr> </tbody> </table> <p><b>At 180 days</b><br/><b>BCVA (ETDRS):</b></p> <table border="1"> <thead> <tr> <th></th> <th>plus <math>\geq</math>10 letters</th> <th>p</th> </tr> </thead> <tbody> <tr> <td><b>DDS350</b></td> <td>20% [graph]</td> <td>NS vs C</td> </tr> <tr> <td><b>DDS700</b></td> <td>33% [graph]</td> <td>NS vs C</td> </tr> <tr> <td><b>C</b></td> <td>23% [graph]</td> <td></td> </tr> </tbody> </table>                                                                                                                                                                                                                                                                                                                                                                                                                                                                 |  | CMT ( $\mu$ m) | p | <b>DDS350</b>  | -42.57 SD95.96 | NS (p=0.07) vs C | <b>DDS700</b>  | -132.27 SD160.86 | <0.001 vs C | <b>C</b> | +30.21 SD82.12 |  |                | plus $\geq$ 10 letters | p               | <b>DDS350</b>  | 20% [graph] | NS vs C | <b>DDS700</b> | 33% [graph] | NS vs C | <b>C</b> | 23% [graph]    |   |                |        |            |                |        |             |          |        |  |
|                                                                                                                                                                                                                                                       | CMT ( $\mu$ m)                                                                                                                                                                                                                                                                                                                                                                                                                                                                                                                                                                                                                                                                                                                                                                                                                                                                                                                         | p                                                                                                                                                                                                                                                                                                                                                                                                                                                                                                                                                                                                                                                                                                                                                                                                                                                       |                                                                                                                                                                                                                                                                                                                                                                                                                                                                                                                                                                                                                                                                                                                                                                                                                                                                                                                                                                                                                                                                                                                                                                                                                                                                                                                            |  |                |   |                |                |                  |                |                  |             |          |                |  |                |                        |                 |                |             |         |               |             |         |          |                |   |                |        |            |                |        |             |          |        |  |
| <b>DDS350</b>                                                                                                                                                                                                                                         | -42.57 SD95.96                                                                                                                                                                                                                                                                                                                                                                                                                                                                                                                                                                                                                                                                                                                                                                                                                                                                                                                         | NS (p=0.07) vs C                                                                                                                                                                                                                                                                                                                                                                                                                                                                                                                                                                                                                                                                                                                                                                                                                                        |                                                                                                                                                                                                                                                                                                                                                                                                                                                                                                                                                                                                                                                                                                                                                                                                                                                                                                                                                                                                                                                                                                                                                                                                                                                                                                                            |  |                |   |                |                |                  |                |                  |             |          |                |  |                |                        |                 |                |             |         |               |             |         |          |                |   |                |        |            |                |        |             |          |        |  |
| <b>DDS700</b>                                                                                                                                                                                                                                         | -132.27 SD160.86                                                                                                                                                                                                                                                                                                                                                                                                                                                                                                                                                                                                                                                                                                                                                                                                                                                                                                                       | <0.001 vs C                                                                                                                                                                                                                                                                                                                                                                                                                                                                                                                                                                                                                                                                                                                                                                                                                                             |                                                                                                                                                                                                                                                                                                                                                                                                                                                                                                                                                                                                                                                                                                                                                                                                                                                                                                                                                                                                                                                                                                                                                                                                                                                                                                                            |  |                |   |                |                |                  |                |                  |             |          |                |  |                |                        |                 |                |             |         |               |             |         |          |                |   |                |        |            |                |        |             |          |        |  |
| <b>C</b>                                                                                                                                                                                                                                              | +30.21 SD82.12                                                                                                                                                                                                                                                                                                                                                                                                                                                                                                                                                                                                                                                                                                                                                                                                                                                                                                                         |                                                                                                                                                                                                                                                                                                                                                                                                                                                                                                                                                                                                                                                                                                                                                                                                                                                         |                                                                                                                                                                                                                                                                                                                                                                                                                                                                                                                                                                                                                                                                                                                                                                                                                                                                                                                                                                                                                                                                                                                                                                                                                                                                                                                            |  |                |   |                |                |                  |                |                  |             |          |                |  |                |                        |                 |                |             |         |               |             |         |          |                |   |                |        |            |                |        |             |          |        |  |
|                                                                                                                                                                                                                                                       | plus $\geq$ 10 letters                                                                                                                                                                                                                                                                                                                                                                                                                                                                                                                                                                                                                                                                                                                                                                                                                                                                                                                 | p                                                                                                                                                                                                                                                                                                                                                                                                                                                                                                                                                                                                                                                                                                                                                                                                                                                       |                                                                                                                                                                                                                                                                                                                                                                                                                                                                                                                                                                                                                                                                                                                                                                                                                                                                                                                                                                                                                                                                                                                                                                                                                                                                                                                            |  |                |   |                |                |                  |                |                  |             |          |                |  |                |                        |                 |                |             |         |               |             |         |          |                |   |                |        |            |                |        |             |          |        |  |
| <b>DDS350</b>                                                                                                                                                                                                                                         | 20% [graph]                                                                                                                                                                                                                                                                                                                                                                                                                                                                                                                                                                                                                                                                                                                                                                                                                                                                                                                            | NS vs C                                                                                                                                                                                                                                                                                                                                                                                                                                                                                                                                                                                                                                                                                                                                                                                                                                                 |                                                                                                                                                                                                                                                                                                                                                                                                                                                                                                                                                                                                                                                                                                                                                                                                                                                                                                                                                                                                                                                                                                                                                                                                                                                                                                                            |  |                |   |                |                |                  |                |                  |             |          |                |  |                |                        |                 |                |             |         |               |             |         |          |                |   |                |        |            |                |        |             |          |        |  |
| <b>DDS700</b>                                                                                                                                                                                                                                         | 33% [graph]                                                                                                                                                                                                                                                                                                                                                                                                                                                                                                                                                                                                                                                                                                                                                                                                                                                                                                                            | NS vs C                                                                                                                                                                                                                                                                                                                                                                                                                                                                                                                                                                                                                                                                                                                                                                                                                                                 |                                                                                                                                                                                                                                                                                                                                                                                                                                                                                                                                                                                                                                                                                                                                                                                                                                                                                                                                                                                                                                                                                                                                                                                                                                                                                                                            |  |                |   |                |                |                  |                |                  |             |          |                |  |                |                        |                 |                |             |         |               |             |         |          |                |   |                |        |            |                |        |             |          |        |  |
| <b>C</b>                                                                                                                                                                                                                                              | 23% [graph]                                                                                                                                                                                                                                                                                                                                                                                                                                                                                                                                                                                                                                                                                                                                                                                                                                                                                                                            |                                                                                                                                                                                                                                                                                                                                                                                                                                                                                                                                                                                                                                                                                                                                                                                                                                                         |                                                                                                                                                                                                                                                                                                                                                                                                                                                                                                                                                                                                                                                                                                                                                                                                                                                                                                                                                                                                                                                                                                                                                                                                                                                                                                                            |  |                |   |                |                |                  |                |                  |             |          |                |  |                |                        |                 |                |             |         |               |             |         |          |                |   |                |        |            |                |        |             |          |        |  |
| <p><b>Fluocinolone</b></p> <p><b>FAME Study (Campochiaro 2011/ Campochiaro 2012) [29,60]</b></p> <p>Multicenter international</p> <p><b>Design:</b> 3-arm placebo-controlled RCT<br/><b>Follow-up:</b> 24 months; abstract with 36 month outcomes</p> | <p><b>N:</b> 956 eyes of 956 patients<br/><b>Inclusion criteria:</b> DMO, CMT <math>\geq</math>250 <math>\mu</math>m despite at least 1 prior focal/grid macular laser photocoagulation treatment, BCVA ETDRS letter score between 19 and 68 (20/50 to 20/400)<br/><b>Exclusion criteria:</b> glaucoma, ocular hypertension, IOP &gt;21 mmHg, taking IOP lowering drops; laser treatment for DMO within 12 weeks of screening, any ocular surgery in the study eye within 12 weeks of screening; ocular or systemic steroid therapy; active ocular infection; pregnancy<br/><b>Age:</b> 62.5 SD9.4 years<br/><b>Sex:</b> 40.6%<br/><b>Diabetes type:</b> 6.6% type 1 DM, 92% type 2 DM, 1.4% uncertain<br/><b>HbA1c:</b> 7.8 SD1.59 %<br/><b>Baseline VA:</b> ETDRS letter score 53.4 SD12.23<br/><b>Baseline CMT:</b> 469.0 SD164.78 <math>\mu</math>m<br/><b>Comorbidities:</b> 47.1% cataract at baseline, 62.7 to 67.4% phakic</p> | <p><b>Group 1 (SRFA0.2, n=375 eyes):</b> intravitreal insert releasing 0.2 <math>\mu</math>g/day fluocinolone acetone (FA) (2, 3, or 4 treatments received by 21.3, 1.9 and 0.3%)<br/><b>Group 2 (SRFA0.5, n=393 eyes):</b> intravitreal insert releasing 0.5 <math>\mu</math>g/day fluocinolone acetone (2, 3, or 4 treatments received by 22.6, 2.5 and 0.3%)<br/><b>Group 3 (C, n=185 eyes):</b> sham injection (2, 3, or 4 treatments received by 19.5, 2.7 and 1.6%)<br/><b>Regimen for all groups:</b> patients could receive rescue focal/grid laser therapy any time after the first 6 weeks for persistent oedema (35.2 to 36.7% in FA groups, 58.9% control group, p&lt;0.001); treatments were allowed every 3 months for persistent or recurrent oedema; patients eligible for another FA insert at 1 year if <math>\geq</math>5 letter</p> | <p><b>At 24 months</b><br/><b>BCVA (ETDRS):</b></p> <table border="1"> <thead> <tr> <th></th> <th>BCVA (letters)</th> <th>p</th> </tr> </thead> <tbody> <tr> <td><b>SRFA0.2</b></td> <td>+4.4</td> <td>0.02 vs C</td> </tr> <tr> <td><b>SRFA0.5</b></td> <td>+5.4</td> <td>0.017 vs C</td> </tr> <tr> <td><b>C</b></td> <td>+1.7</td> <td></td> </tr> </tbody> </table> <p><b>plus <math>\geq</math>15 letters</b></p> <table border="1"> <tbody> <tr> <td><b>SRFA0.2</b></td> <td>29%</td> <td>0.002 SRFA vs C</td> </tr> <tr> <td><b>SRFA0.5</b></td> <td>29%</td> <td></td> </tr> <tr> <td><b>C</b></td> <td>16%</td> <td></td> </tr> </tbody> </table> <p>Subgroups:</p> <ul style="list-style-type: none"> <li>BCVA benefits only in pseudophakic eyes (cataract surgery before or during the study), in phakic eyes, BCVA letter score was reduced by 5 (high dose) and 9 (low dose) from baseline at 24 months</li> </ul> <p><b>CMT (optical coherence tomography):</b></p> <table border="1"> <thead> <tr> <th></th> <th>CMT (<math>\mu</math>m)</th> <th>p</th> </tr> </thead> <tbody> <tr> <td><b>SRFA0.2</b></td> <td>-167.8</td> <td>0.005 vs C</td> </tr> <tr> <td><b>SRFA0.5</b></td> <td>-177.1</td> <td>&lt;0.001 vs C</td> </tr> <tr> <td><b>C</b></td> <td>-111.3</td> <td></td> </tr> </tbody> </table> |  | BCVA (letters) | p | <b>SRFA0.2</b> | +4.4           | 0.02 vs C        | <b>SRFA0.5</b> | +5.4             | 0.017 vs C  | <b>C</b> | +1.7           |  | <b>SRFA0.2</b> | 29%                    | 0.002 SRFA vs C | <b>SRFA0.5</b> | 29%         |         | <b>C</b>      | 16%         |         |          | CMT ( $\mu$ m) | p | <b>SRFA0.2</b> | -167.8 | 0.005 vs C | <b>SRFA0.5</b> | -177.1 | <0.001 vs C | <b>C</b> | -111.3 |  |
|                                                                                                                                                                                                                                                       | BCVA (letters)                                                                                                                                                                                                                                                                                                                                                                                                                                                                                                                                                                                                                                                                                                                                                                                                                                                                                                                         | p                                                                                                                                                                                                                                                                                                                                                                                                                                                                                                                                                                                                                                                                                                                                                                                                                                                       |                                                                                                                                                                                                                                                                                                                                                                                                                                                                                                                                                                                                                                                                                                                                                                                                                                                                                                                                                                                                                                                                                                                                                                                                                                                                                                                            |  |                |   |                |                |                  |                |                  |             |          |                |  |                |                        |                 |                |             |         |               |             |         |          |                |   |                |        |            |                |        |             |          |        |  |
| <b>SRFA0.2</b>                                                                                                                                                                                                                                        | +4.4                                                                                                                                                                                                                                                                                                                                                                                                                                                                                                                                                                                                                                                                                                                                                                                                                                                                                                                                   | 0.02 vs C                                                                                                                                                                                                                                                                                                                                                                                                                                                                                                                                                                                                                                                                                                                                                                                                                                               |                                                                                                                                                                                                                                                                                                                                                                                                                                                                                                                                                                                                                                                                                                                                                                                                                                                                                                                                                                                                                                                                                                                                                                                                                                                                                                                            |  |                |   |                |                |                  |                |                  |             |          |                |  |                |                        |                 |                |             |         |               |             |         |          |                |   |                |        |            |                |        |             |          |        |  |
| <b>SRFA0.5</b>                                                                                                                                                                                                                                        | +5.4                                                                                                                                                                                                                                                                                                                                                                                                                                                                                                                                                                                                                                                                                                                                                                                                                                                                                                                                   | 0.017 vs C                                                                                                                                                                                                                                                                                                                                                                                                                                                                                                                                                                                                                                                                                                                                                                                                                                              |                                                                                                                                                                                                                                                                                                                                                                                                                                                                                                                                                                                                                                                                                                                                                                                                                                                                                                                                                                                                                                                                                                                                                                                                                                                                                                                            |  |                |   |                |                |                  |                |                  |             |          |                |  |                |                        |                 |                |             |         |               |             |         |          |                |   |                |        |            |                |        |             |          |        |  |
| <b>C</b>                                                                                                                                                                                                                                              | +1.7                                                                                                                                                                                                                                                                                                                                                                                                                                                                                                                                                                                                                                                                                                                                                                                                                                                                                                                                   |                                                                                                                                                                                                                                                                                                                                                                                                                                                                                                                                                                                                                                                                                                                                                                                                                                                         |                                                                                                                                                                                                                                                                                                                                                                                                                                                                                                                                                                                                                                                                                                                                                                                                                                                                                                                                                                                                                                                                                                                                                                                                                                                                                                                            |  |                |   |                |                |                  |                |                  |             |          |                |  |                |                        |                 |                |             |         |               |             |         |          |                |   |                |        |            |                |        |             |          |        |  |
| <b>SRFA0.2</b>                                                                                                                                                                                                                                        | 29%                                                                                                                                                                                                                                                                                                                                                                                                                                                                                                                                                                                                                                                                                                                                                                                                                                                                                                                                    | 0.002 SRFA vs C                                                                                                                                                                                                                                                                                                                                                                                                                                                                                                                                                                                                                                                                                                                                                                                                                                         |                                                                                                                                                                                                                                                                                                                                                                                                                                                                                                                                                                                                                                                                                                                                                                                                                                                                                                                                                                                                                                                                                                                                                                                                                                                                                                                            |  |                |   |                |                |                  |                |                  |             |          |                |  |                |                        |                 |                |             |         |               |             |         |          |                |   |                |        |            |                |        |             |          |        |  |
| <b>SRFA0.5</b>                                                                                                                                                                                                                                        | 29%                                                                                                                                                                                                                                                                                                                                                                                                                                                                                                                                                                                                                                                                                                                                                                                                                                                                                                                                    |                                                                                                                                                                                                                                                                                                                                                                                                                                                                                                                                                                                                                                                                                                                                                                                                                                                         |                                                                                                                                                                                                                                                                                                                                                                                                                                                                                                                                                                                                                                                                                                                                                                                                                                                                                                                                                                                                                                                                                                                                                                                                                                                                                                                            |  |                |   |                |                |                  |                |                  |             |          |                |  |                |                        |                 |                |             |         |               |             |         |          |                |   |                |        |            |                |        |             |          |        |  |
| <b>C</b>                                                                                                                                                                                                                                              | 16%                                                                                                                                                                                                                                                                                                                                                                                                                                                                                                                                                                                                                                                                                                                                                                                                                                                                                                                                    |                                                                                                                                                                                                                                                                                                                                                                                                                                                                                                                                                                                                                                                                                                                                                                                                                                                         |                                                                                                                                                                                                                                                                                                                                                                                                                                                                                                                                                                                                                                                                                                                                                                                                                                                                                                                                                                                                                                                                                                                                                                                                                                                                                                                            |  |                |   |                |                |                  |                |                  |             |          |                |  |                |                        |                 |                |             |         |               |             |         |          |                |   |                |        |            |                |        |             |          |        |  |
|                                                                                                                                                                                                                                                       | CMT ( $\mu$ m)                                                                                                                                                                                                                                                                                                                                                                                                                                                                                                                                                                                                                                                                                                                                                                                                                                                                                                                         | p                                                                                                                                                                                                                                                                                                                                                                                                                                                                                                                                                                                                                                                                                                                                                                                                                                                       |                                                                                                                                                                                                                                                                                                                                                                                                                                                                                                                                                                                                                                                                                                                                                                                                                                                                                                                                                                                                                                                                                                                                                                                                                                                                                                                            |  |                |   |                |                |                  |                |                  |             |          |                |  |                |                        |                 |                |             |         |               |             |         |          |                |   |                |        |            |                |        |             |          |        |  |
| <b>SRFA0.2</b>                                                                                                                                                                                                                                        | -167.8                                                                                                                                                                                                                                                                                                                                                                                                                                                                                                                                                                                                                                                                                                                                                                                                                                                                                                                                 | 0.005 vs C                                                                                                                                                                                                                                                                                                                                                                                                                                                                                                                                                                                                                                                                                                                                                                                                                                              |                                                                                                                                                                                                                                                                                                                                                                                                                                                                                                                                                                                                                                                                                                                                                                                                                                                                                                                                                                                                                                                                                                                                                                                                                                                                                                                            |  |                |   |                |                |                  |                |                  |             |          |                |  |                |                        |                 |                |             |         |               |             |         |          |                |   |                |        |            |                |        |             |          |        |  |
| <b>SRFA0.5</b>                                                                                                                                                                                                                                        | -177.1                                                                                                                                                                                                                                                                                                                                                                                                                                                                                                                                                                                                                                                                                                                                                                                                                                                                                                                                 | <0.001 vs C                                                                                                                                                                                                                                                                                                                                                                                                                                                                                                                                                                                                                                                                                                                                                                                                                                             |                                                                                                                                                                                                                                                                                                                                                                                                                                                                                                                                                                                                                                                                                                                                                                                                                                                                                                                                                                                                                                                                                                                                                                                                                                                                                                                            |  |                |   |                |                |                  |                |                  |             |          |                |  |                |                        |                 |                |             |         |               |             |         |          |                |   |                |        |            |                |        |             |          |        |  |
| <b>C</b>                                                                                                                                                                                                                                              | -111.3                                                                                                                                                                                                                                                                                                                                                                                                                                                                                                                                                                                                                                                                                                                                                                                                                                                                                                                                 |                                                                                                                                                                                                                                                                                                                                                                                                                                                                                                                                                                                                                                                                                                                                                                                                                                                         |                                                                                                                                                                                                                                                                                                                                                                                                                                                                                                                                                                                                                                                                                                                                                                                                                                                                                                                                                                                                                                                                                                                                                                                                                                                                                                                            |  |                |   |                |                |                  |                |                  |             |          |                |  |                |                        |                 |                |             |         |               |             |         |          |                |   |                |        |            |                |        |             |          |        |  |

| Study                                                                                                                                                | Participants and baseline values                                                                                                                                                                                                                                                                                                                                                                                                                                                                                                                                                                                                                                                                                                                                                                                                                                                                                                                                                            | Intervention                                                                                                                                                                                                                            | Outcome (change from baseline at study end)                                                                                                                                                                                                                                                                                                                                                                                                                                                                                                                                                                                                                                                                                                                                                                                                                                                                                              |                  |  |  |                  |             |     |                      |       |                 |          |       |  |                  |  |  |   |             |     |  |    |            |     |  |  |                             |  |   |             |     |    |            |      |  |
|------------------------------------------------------------------------------------------------------------------------------------------------------|---------------------------------------------------------------------------------------------------------------------------------------------------------------------------------------------------------------------------------------------------------------------------------------------------------------------------------------------------------------------------------------------------------------------------------------------------------------------------------------------------------------------------------------------------------------------------------------------------------------------------------------------------------------------------------------------------------------------------------------------------------------------------------------------------------------------------------------------------------------------------------------------------------------------------------------------------------------------------------------------|-----------------------------------------------------------------------------------------------------------------------------------------------------------------------------------------------------------------------------------------|------------------------------------------------------------------------------------------------------------------------------------------------------------------------------------------------------------------------------------------------------------------------------------------------------------------------------------------------------------------------------------------------------------------------------------------------------------------------------------------------------------------------------------------------------------------------------------------------------------------------------------------------------------------------------------------------------------------------------------------------------------------------------------------------------------------------------------------------------------------------------------------------------------------------------------------|------------------|--|--|------------------|-------------|-----|----------------------|-------|-----------------|----------|-------|--|------------------|--|--|---|-------------|-----|--|----|------------|-----|--|--|-----------------------------|--|---|-------------|-----|----|------------|------|--|
|                                                                                                                                                      |                                                                                                                                                                                                                                                                                                                                                                                                                                                                                                                                                                                                                                                                                                                                                                                                                                                                                                                                                                                             | reduction in BCVA or >50 µm CMT increase from best status                                                                                                                                                                               | <ul style="list-style-type: none"> <li>effect maintained at 36 months</li> </ul> <table border="1" data-bbox="1360 334 1843 440"> <thead> <tr> <th colspan="3">At 36 months</th> </tr> <tr> <th colspan="3">plus ≥15 letters</th> </tr> </thead> <tbody> <tr> <td><i>SRFA</i> 0.2/ 0.5</td> <td>28.7%</td> <td>0.018 SRFA vs C</td> </tr> <tr> <td><i>C</i></td> <td>18.9%</td> <td></td> </tr> </tbody> </table>                                                                                                                                                                                                                                                                                                                                                                                                                                                                                                                        | At 36 months     |  |  | plus ≥15 letters |             |     | <i>SRFA</i> 0.2/ 0.5 | 28.7% | 0.018 SRFA vs C | <i>C</i> | 18.9% |  |                  |  |  |   |             |     |  |    |            |     |  |  |                             |  |   |             |     |    |            |      |  |
| At 36 months                                                                                                                                         |                                                                                                                                                                                                                                                                                                                                                                                                                                                                                                                                                                                                                                                                                                                                                                                                                                                                                                                                                                                             |                                                                                                                                                                                                                                         |                                                                                                                                                                                                                                                                                                                                                                                                                                                                                                                                                                                                                                                                                                                                                                                                                                                                                                                                          |                  |  |  |                  |             |     |                      |       |                 |          |       |  |                  |  |  |   |             |     |  |    |            |     |  |  |                             |  |   |             |     |    |            |      |  |
| plus ≥15 letters                                                                                                                                     |                                                                                                                                                                                                                                                                                                                                                                                                                                                                                                                                                                                                                                                                                                                                                                                                                                                                                                                                                                                             |                                                                                                                                                                                                                                         |                                                                                                                                                                                                                                                                                                                                                                                                                                                                                                                                                                                                                                                                                                                                                                                                                                                                                                                                          |                  |  |  |                  |             |     |                      |       |                 |          |       |  |                  |  |  |   |             |     |  |    |            |     |  |  |                             |  |   |             |     |    |            |      |  |
| <i>SRFA</i> 0.2/ 0.5                                                                                                                                 | 28.7%                                                                                                                                                                                                                                                                                                                                                                                                                                                                                                                                                                                                                                                                                                                                                                                                                                                                                                                                                                                       | 0.018 SRFA vs C                                                                                                                                                                                                                         |                                                                                                                                                                                                                                                                                                                                                                                                                                                                                                                                                                                                                                                                                                                                                                                                                                                                                                                                          |                  |  |  |                  |             |     |                      |       |                 |          |       |  |                  |  |  |   |             |     |  |    |            |     |  |  |                             |  |   |             |     |    |            |      |  |
| <i>C</i>                                                                                                                                             | 18.9%                                                                                                                                                                                                                                                                                                                                                                                                                                                                                                                                                                                                                                                                                                                                                                                                                                                                                                                                                                                       |                                                                                                                                                                                                                                         |                                                                                                                                                                                                                                                                                                                                                                                                                                                                                                                                                                                                                                                                                                                                                                                                                                                                                                                                          |                  |  |  |                  |             |     |                      |       |                 |          |       |  |                  |  |  |   |             |     |  |    |            |     |  |  |                             |  |   |             |     |    |            |      |  |
| <p><b>Pearson 2011</b>[43]<br/> <b>USA</b><br/>                     Multicenter</p> <p><b>Design:</b> 2-arm RCT<br/> <b>Follow-up:</b> 36 months</p> | <p><b>N:</b> 196 patients</p> <p><b>Inclusion criteria:</b> persistent or recurrent unilateral or bilateral DMO with retinal thickening involving fixation of ≥1 disc area in size, ETDRS visual acuity of ≥20 letters (20/400) to ≤68 letters (20/50) and ≥1 macular laser treatment in the study eye more than 12 weeks prior to enrollment</p> <p><b>Exclusion criteria:</b> Ocular surgery within 3 months prior to enrolment, uncontrolled IOP within the past 12 months while on ≥1 antiglaucoma medication, IOP of ≥22 mmHg at screening while on ≥1 antiglaucoma medication, peripheral retinal detachment in the area of implantation or media opacity precluding diagnosis of status in the study eye</p> <p><b>Age:</b> 61.4-62.7 years<br/> <b>Sex:</b> 41.7-42% female<br/> <b>Diabetes type:</b> 62.3-70% on insulin<br/> <b>HbA1c:</b> not reported<br/> <b>Baseline VA:</b> not reported<br/> <b>Baseline CMT:</b> not reported<br/> <b>Comorbidities:</b> not reported</p> | <p><b>Group 1 (SRFA, n= 127):</b> 0.5 mg sustained release fluocinolone acetonide intravitreal implant</p> <p><b>Group 2 (SOC, n= 69):</b> standard of care – either repeat laser or observation</p> <p><b>Laser ETDRS protocol</b></p> | <p><b>At 3 years</b></p> <p><b>BCVA:</b></p> <table border="1" data-bbox="1360 521 1843 683"> <thead> <tr> <th colspan="3">gain ≥15 letters</th> <th>p</th> </tr> </thead> <tbody> <tr> <td><i>SRFA</i></td> <td>31%</td> <td></td> <td>NS</td> </tr> <tr> <td><i>SOC</i></td> <td>20%</td> <td></td> <td></td> </tr> </tbody> </table> <table border="1" data-bbox="1360 602 1843 683"> <thead> <tr> <th colspan="3">loss ≥15 letters</th> <th>p</th> </tr> </thead> <tbody> <tr> <td><i>SRFA</i></td> <td>17%</td> <td></td> <td>NS</td> </tr> <tr> <td><i>SOC</i></td> <td>14%</td> <td></td> <td></td> </tr> </tbody> </table> <p><b>CMT:</b></p> <table border="1" data-bbox="1360 732 1843 846"> <thead> <tr> <th colspan="2">Mean change in baseline CMT</th> <th>p</th> </tr> </thead> <tbody> <tr> <td><i>SRFA</i></td> <td>-86</td> <td>NS</td> </tr> <tr> <td><i>SOC</i></td> <td>-110</td> <td></td> </tr> </tbody> </table> | gain ≥15 letters |  |  | p                | <i>SRFA</i> | 31% |                      | NS    | <i>SOC</i>      | 20%      |       |  | loss ≥15 letters |  |  | p | <i>SRFA</i> | 17% |  | NS | <i>SOC</i> | 14% |  |  | Mean change in baseline CMT |  | p | <i>SRFA</i> | -86 | NS | <i>SOC</i> | -110 |  |
| gain ≥15 letters                                                                                                                                     |                                                                                                                                                                                                                                                                                                                                                                                                                                                                                                                                                                                                                                                                                                                                                                                                                                                                                                                                                                                             |                                                                                                                                                                                                                                         | p                                                                                                                                                                                                                                                                                                                                                                                                                                                                                                                                                                                                                                                                                                                                                                                                                                                                                                                                        |                  |  |  |                  |             |     |                      |       |                 |          |       |  |                  |  |  |   |             |     |  |    |            |     |  |  |                             |  |   |             |     |    |            |      |  |
| <i>SRFA</i>                                                                                                                                          | 31%                                                                                                                                                                                                                                                                                                                                                                                                                                                                                                                                                                                                                                                                                                                                                                                                                                                                                                                                                                                         |                                                                                                                                                                                                                                         | NS                                                                                                                                                                                                                                                                                                                                                                                                                                                                                                                                                                                                                                                                                                                                                                                                                                                                                                                                       |                  |  |  |                  |             |     |                      |       |                 |          |       |  |                  |  |  |   |             |     |  |    |            |     |  |  |                             |  |   |             |     |    |            |      |  |
| <i>SOC</i>                                                                                                                                           | 20%                                                                                                                                                                                                                                                                                                                                                                                                                                                                                                                                                                                                                                                                                                                                                                                                                                                                                                                                                                                         |                                                                                                                                                                                                                                         |                                                                                                                                                                                                                                                                                                                                                                                                                                                                                                                                                                                                                                                                                                                                                                                                                                                                                                                                          |                  |  |  |                  |             |     |                      |       |                 |          |       |  |                  |  |  |   |             |     |  |    |            |     |  |  |                             |  |   |             |     |    |            |      |  |
| loss ≥15 letters                                                                                                                                     |                                                                                                                                                                                                                                                                                                                                                                                                                                                                                                                                                                                                                                                                                                                                                                                                                                                                                                                                                                                             |                                                                                                                                                                                                                                         | p                                                                                                                                                                                                                                                                                                                                                                                                                                                                                                                                                                                                                                                                                                                                                                                                                                                                                                                                        |                  |  |  |                  |             |     |                      |       |                 |          |       |  |                  |  |  |   |             |     |  |    |            |     |  |  |                             |  |   |             |     |    |            |      |  |
| <i>SRFA</i>                                                                                                                                          | 17%                                                                                                                                                                                                                                                                                                                                                                                                                                                                                                                                                                                                                                                                                                                                                                                                                                                                                                                                                                                         |                                                                                                                                                                                                                                         | NS                                                                                                                                                                                                                                                                                                                                                                                                                                                                                                                                                                                                                                                                                                                                                                                                                                                                                                                                       |                  |  |  |                  |             |     |                      |       |                 |          |       |  |                  |  |  |   |             |     |  |    |            |     |  |  |                             |  |   |             |     |    |            |      |  |
| <i>SOC</i>                                                                                                                                           | 14%                                                                                                                                                                                                                                                                                                                                                                                                                                                                                                                                                                                                                                                                                                                                                                                                                                                                                                                                                                                         |                                                                                                                                                                                                                                         |                                                                                                                                                                                                                                                                                                                                                                                                                                                                                                                                                                                                                                                                                                                                                                                                                                                                                                                                          |                  |  |  |                  |             |     |                      |       |                 |          |       |  |                  |  |  |   |             |     |  |    |            |     |  |  |                             |  |   |             |     |    |            |      |  |
| Mean change in baseline CMT                                                                                                                          |                                                                                                                                                                                                                                                                                                                                                                                                                                                                                                                                                                                                                                                                                                                                                                                                                                                                                                                                                                                             | p                                                                                                                                                                                                                                       |                                                                                                                                                                                                                                                                                                                                                                                                                                                                                                                                                                                                                                                                                                                                                                                                                                                                                                                                          |                  |  |  |                  |             |     |                      |       |                 |          |       |  |                  |  |  |   |             |     |  |    |            |     |  |  |                             |  |   |             |     |    |            |      |  |
| <i>SRFA</i>                                                                                                                                          | -86                                                                                                                                                                                                                                                                                                                                                                                                                                                                                                                                                                                                                                                                                                                                                                                                                                                                                                                                                                                         | NS                                                                                                                                                                                                                                      |                                                                                                                                                                                                                                                                                                                                                                                                                                                                                                                                                                                                                                                                                                                                                                                                                                                                                                                                          |                  |  |  |                  |             |     |                      |       |                 |          |       |  |                  |  |  |   |             |     |  |    |            |     |  |  |                             |  |   |             |     |    |            |      |  |
| <i>SOC</i>                                                                                                                                           | -110                                                                                                                                                                                                                                                                                                                                                                                                                                                                                                                                                                                                                                                                                                                                                                                                                                                                                                                                                                                        |                                                                                                                                                                                                                                         |                                                                                                                                                                                                                                                                                                                                                                                                                                                                                                                                                                                                                                                                                                                                                                                                                                                                                                                                          |                  |  |  |                  |             |     |                      |       |                 |          |       |  |                  |  |  |   |             |     |  |    |            |     |  |  |                             |  |   |             |     |    |            |      |  |

Abbreviations: See table 2

Table 6: Triamcinolone studies

| Study                                                                                                                                                                                                          | Participants and baseline values                                                                                                                                                                                                                                                                                                                                                                                                                                                                                                                                                                                                                                                                                                                                                                                                                                                                                                                                                                                                                                                                                                                                                                                                                      | Intervention                                                                                                                                                                                                                                                                                                                                                                                                                                                                                                                                                                                                                                                                                                                                                                                                                                                                                                                                                                                                                                                                                                                                                                                                                         | Outcome (change from baseline at study end)                                                                                                                                                                                                                                                                                                                                                                                                                                                                                                                                                                                                                                                                                                                                                                                                                                                                                                                                                                                                                                                                                                                                                                                                                                                                                                                                                                                                                                                                                                                                                                                                                                                                                                                                                                                                                                                                                                                                                            |  |                |   |             |         |           |             |         |            |          |         |            |  |                      |   |             |                                                       |                       |             |                                                       |           |          |                                                       |  |  |                |   |             |           |                         |             |           |             |          |            |  |  |       |       |   |             |     |     |  |             |     |     |            |
|----------------------------------------------------------------------------------------------------------------------------------------------------------------------------------------------------------------|-------------------------------------------------------------------------------------------------------------------------------------------------------------------------------------------------------------------------------------------------------------------------------------------------------------------------------------------------------------------------------------------------------------------------------------------------------------------------------------------------------------------------------------------------------------------------------------------------------------------------------------------------------------------------------------------------------------------------------------------------------------------------------------------------------------------------------------------------------------------------------------------------------------------------------------------------------------------------------------------------------------------------------------------------------------------------------------------------------------------------------------------------------------------------------------------------------------------------------------------------------|--------------------------------------------------------------------------------------------------------------------------------------------------------------------------------------------------------------------------------------------------------------------------------------------------------------------------------------------------------------------------------------------------------------------------------------------------------------------------------------------------------------------------------------------------------------------------------------------------------------------------------------------------------------------------------------------------------------------------------------------------------------------------------------------------------------------------------------------------------------------------------------------------------------------------------------------------------------------------------------------------------------------------------------------------------------------------------------------------------------------------------------------------------------------------------------------------------------------------------------|--------------------------------------------------------------------------------------------------------------------------------------------------------------------------------------------------------------------------------------------------------------------------------------------------------------------------------------------------------------------------------------------------------------------------------------------------------------------------------------------------------------------------------------------------------------------------------------------------------------------------------------------------------------------------------------------------------------------------------------------------------------------------------------------------------------------------------------------------------------------------------------------------------------------------------------------------------------------------------------------------------------------------------------------------------------------------------------------------------------------------------------------------------------------------------------------------------------------------------------------------------------------------------------------------------------------------------------------------------------------------------------------------------------------------------------------------------------------------------------------------------------------------------------------------------------------------------------------------------------------------------------------------------------------------------------------------------------------------------------------------------------------------------------------------------------------------------------------------------------------------------------------------------------------------------------------------------------------------------------------------------|--|----------------|---|-------------|---------|-----------|-------------|---------|------------|----------|---------|------------|--|----------------------|---|-------------|-------------------------------------------------------|-----------------------|-------------|-------------------------------------------------------|-----------|----------|-------------------------------------------------------|--|--|----------------|---|-------------|-----------|-------------------------|-------------|-----------|-------------|----------|------------|--|--|-------|-------|---|-------------|-----|-----|--|-------------|-----|-----|------------|
| <p><b>DRCR Network 2008 (Ip 2008a / 2008b / Beck 2009 / Bressler 2009)</b>[22,61,63,64]<br/>USA<br/>Multicenter</p> <p><b>Design:</b> 3-arm RCT<br/><b>Follow-up:</b> 2 years, additional 3 year follow-up</p> | <p><b>N:</b> 840 eyes of 693 patients<br/><b>Inclusion criteria:</b> &gt;18 years, type 1 or 2 DM, study eye: (1) BCVA (E-ETDRS) between 24 and 73 (20/320 and 20/40), (2) retinal thickening due to DMO involving the center of the macula main cause for visual loss, (3) CMT <math>\geq</math>250 <math>\mu</math>m, (4) no expectation of scatter photocoagulation within 4 months<br/><b>Exclusion criteria:</b> any prior treatment with IV corticosteroids, peribulbar steroid injection within prior 6 months, photocoagulation for DMO within prior 15 weeks, panretinal scatter photocoagulation within prior 4 months, pars plana vitrectomy, history of open-angle glaucoma or steroid-induced IOP elevation requiring IOP-lowering treatment, and IOP <math>\geq</math>25 mmHg<br/><b>Age:</b> 63 SD9 years<br/><b>Sex:</b> 49% female<br/><b>Diabetes type:</b> 95% type 2 DM, 5% type 1 DM<br/><b>HbA1c:</b> 7.9 SD1.8%<br/><b>Baseline VA:</b> ETDRS letter score 59 SD11 (~20/63)<br/><b>Baseline CMT:</b> 24 SD130 <math>\mu</math>m<br/><b>Comorbidities:</b> 21% pseudophakic, 2% ocular hypertension, 7% mild NPDR, 13% moderate NPDR, 40% moderately severe NPDR, 11% severe NPDR, 23.5% mild to moderate, 3% high risk PDR</p> | <p><b>Group 1 (IVT1, n=256 eyes):</b><br/>1 mg IV triamcinolone (3.5 treatments)<br/><b>Group 2 (IVT4, n=254 eyes):</b><br/>4 mg IV triamcinolone (3.1 treatments)<br/><b>Group 3 (L, n=330 eyes):</b><br/>focal/grid photocoagulation (2.9 treatments)<br/><b>Regimen for all groups:</b><br/>retreatment protocol: where indicated, retreatment was performed within 4 weeks after the follow-up visit and no sooner than 3.5 months from the time of last treatment; eyes were generally retreated unless:<br/>(1) little or no oedema involving the center of the macula present and CMT <math>\leq</math>225 <math>\mu</math>m, (2) VA letter score <math>\geq</math>79 (20/25 or better), (3) substantial improvement in macular oedema since last treatment (e.g., <math>\geq</math> 50% decrease in CMT), (4) clinically significant adverse effect from prior treatment, (5) additional treatment deemed futile (&lt;5 letter improvement in VA letter score or lack of CMT reduction), and (6) for laser group, complete focal/grid photocoagulation already given, with no areas identified for which additional treatment was indicated<br/><b>Laser Modified ETDRS protocol</b> as used in prior DRCR.net protocols</p> | <p><b>At 2 years</b><br/><b>BCVA (E-ETDRS):</b></p> <table border="1"> <thead> <tr> <th></th> <th>BCVA (letters)</th> <th>p</th> </tr> </thead> <tbody> <tr> <td><i>IVT1</i></td> <td>-2 SD18</td> <td>0.02 vs L</td> </tr> <tr> <td><i>IVT4</i></td> <td>-3 SD22</td> <td>NS vs IVT4</td> </tr> <tr> <td><i>L</i></td> <td>+1 SD17</td> <td>0.002 vs L</td> </tr> </tbody> </table> <p><b>BCVA gain categories</b></p> <table border="1"> <thead> <tr> <th></th> <th>BCVA gain categories</th> <th>p</th> </tr> </thead> <tbody> <tr> <td><i>IVT1</i></td> <td>+10 or more: 25%<br/>+9 to -9: 50%<br/>-10 or more: 26%</td> <td>0.03 vs L, NS vs IVT4</td> </tr> <tr> <td><i>IVT4</i></td> <td>+10 or more: 28%<br/>+9 to -9: 44%<br/>-10 or more: 28%</td> <td>0.01 vs L</td> </tr> <tr> <td><i>L</i></td> <td>+10 or more: 31%<br/>+9 to -9: 50%<br/>-10 or more: 19%</td> <td></td> </tr> </tbody> </table> <p>Subgroups:</p> <ul style="list-style-type: none"> <li>• similar results when considering only pseudophakic eyes or eyes with minimal cataract</li> <li>• no substantially different results based on baseline VA, baseline CMT, history of focal/grid photocoagulation for DMO</li> <li>• 3 year results consistent with 2 year results for BCVA and CMT</li> </ul> <p><b>CMT (OCT):</b></p> <table border="1"> <thead> <tr> <th></th> <th>CMT (<math>\mu</math>m)</th> <th>p</th> </tr> </thead> <tbody> <tr> <td><i>IVT1</i></td> <td>-86 SD167</td> <td>&lt;0.001 vs L, NS vs IVT4</td> </tr> <tr> <td><i>IVT4</i></td> <td>-77 SD160</td> <td>&lt;0.001 vs L</td> </tr> <tr> <td><i>L</i></td> <td>-139 SD148</td> <td></td> </tr> </tbody> </table> <p><b>Progression of retinopathy:</b></p> <table border="1"> <thead> <tr> <th></th> <th>2 yrs</th> <th>3 yrs</th> <th>p</th> </tr> </thead> <tbody> <tr> <td><i>IVT1</i></td> <td>29%</td> <td>35%</td> <td></td> </tr> <tr> <td><i>IVT4</i></td> <td>21%</td> <td>30%</td> <td>&lt;0.05 vs L</td> </tr> </tbody> </table> |  | BCVA (letters) | p | <i>IVT1</i> | -2 SD18 | 0.02 vs L | <i>IVT4</i> | -3 SD22 | NS vs IVT4 | <i>L</i> | +1 SD17 | 0.002 vs L |  | BCVA gain categories | p | <i>IVT1</i> | +10 or more: 25%<br>+9 to -9: 50%<br>-10 or more: 26% | 0.03 vs L, NS vs IVT4 | <i>IVT4</i> | +10 or more: 28%<br>+9 to -9: 44%<br>-10 or more: 28% | 0.01 vs L | <i>L</i> | +10 or more: 31%<br>+9 to -9: 50%<br>-10 or more: 19% |  |  | CMT ( $\mu$ m) | p | <i>IVT1</i> | -86 SD167 | <0.001 vs L, NS vs IVT4 | <i>IVT4</i> | -77 SD160 | <0.001 vs L | <i>L</i> | -139 SD148 |  |  | 2 yrs | 3 yrs | p | <i>IVT1</i> | 29% | 35% |  | <i>IVT4</i> | 21% | 30% | <0.05 vs L |
|                                                                                                                                                                                                                | BCVA (letters)                                                                                                                                                                                                                                                                                                                                                                                                                                                                                                                                                                                                                                                                                                                                                                                                                                                                                                                                                                                                                                                                                                                                                                                                                                        | p                                                                                                                                                                                                                                                                                                                                                                                                                                                                                                                                                                                                                                                                                                                                                                                                                                                                                                                                                                                                                                                                                                                                                                                                                                    |                                                                                                                                                                                                                                                                                                                                                                                                                                                                                                                                                                                                                                                                                                                                                                                                                                                                                                                                                                                                                                                                                                                                                                                                                                                                                                                                                                                                                                                                                                                                                                                                                                                                                                                                                                                                                                                                                                                                                                                                        |  |                |   |             |         |           |             |         |            |          |         |            |  |                      |   |             |                                                       |                       |             |                                                       |           |          |                                                       |  |  |                |   |             |           |                         |             |           |             |          |            |  |  |       |       |   |             |     |     |  |             |     |     |            |
| <i>IVT1</i>                                                                                                                                                                                                    | -2 SD18                                                                                                                                                                                                                                                                                                                                                                                                                                                                                                                                                                                                                                                                                                                                                                                                                                                                                                                                                                                                                                                                                                                                                                                                                                               | 0.02 vs L                                                                                                                                                                                                                                                                                                                                                                                                                                                                                                                                                                                                                                                                                                                                                                                                                                                                                                                                                                                                                                                                                                                                                                                                                            |                                                                                                                                                                                                                                                                                                                                                                                                                                                                                                                                                                                                                                                                                                                                                                                                                                                                                                                                                                                                                                                                                                                                                                                                                                                                                                                                                                                                                                                                                                                                                                                                                                                                                                                                                                                                                                                                                                                                                                                                        |  |                |   |             |         |           |             |         |            |          |         |            |  |                      |   |             |                                                       |                       |             |                                                       |           |          |                                                       |  |  |                |   |             |           |                         |             |           |             |          |            |  |  |       |       |   |             |     |     |  |             |     |     |            |
| <i>IVT4</i>                                                                                                                                                                                                    | -3 SD22                                                                                                                                                                                                                                                                                                                                                                                                                                                                                                                                                                                                                                                                                                                                                                                                                                                                                                                                                                                                                                                                                                                                                                                                                                               | NS vs IVT4                                                                                                                                                                                                                                                                                                                                                                                                                                                                                                                                                                                                                                                                                                                                                                                                                                                                                                                                                                                                                                                                                                                                                                                                                           |                                                                                                                                                                                                                                                                                                                                                                                                                                                                                                                                                                                                                                                                                                                                                                                                                                                                                                                                                                                                                                                                                                                                                                                                                                                                                                                                                                                                                                                                                                                                                                                                                                                                                                                                                                                                                                                                                                                                                                                                        |  |                |   |             |         |           |             |         |            |          |         |            |  |                      |   |             |                                                       |                       |             |                                                       |           |          |                                                       |  |  |                |   |             |           |                         |             |           |             |          |            |  |  |       |       |   |             |     |     |  |             |     |     |            |
| <i>L</i>                                                                                                                                                                                                       | +1 SD17                                                                                                                                                                                                                                                                                                                                                                                                                                                                                                                                                                                                                                                                                                                                                                                                                                                                                                                                                                                                                                                                                                                                                                                                                                               | 0.002 vs L                                                                                                                                                                                                                                                                                                                                                                                                                                                                                                                                                                                                                                                                                                                                                                                                                                                                                                                                                                                                                                                                                                                                                                                                                           |                                                                                                                                                                                                                                                                                                                                                                                                                                                                                                                                                                                                                                                                                                                                                                                                                                                                                                                                                                                                                                                                                                                                                                                                                                                                                                                                                                                                                                                                                                                                                                                                                                                                                                                                                                                                                                                                                                                                                                                                        |  |                |   |             |         |           |             |         |            |          |         |            |  |                      |   |             |                                                       |                       |             |                                                       |           |          |                                                       |  |  |                |   |             |           |                         |             |           |             |          |            |  |  |       |       |   |             |     |     |  |             |     |     |            |
|                                                                                                                                                                                                                | BCVA gain categories                                                                                                                                                                                                                                                                                                                                                                                                                                                                                                                                                                                                                                                                                                                                                                                                                                                                                                                                                                                                                                                                                                                                                                                                                                  | p                                                                                                                                                                                                                                                                                                                                                                                                                                                                                                                                                                                                                                                                                                                                                                                                                                                                                                                                                                                                                                                                                                                                                                                                                                    |                                                                                                                                                                                                                                                                                                                                                                                                                                                                                                                                                                                                                                                                                                                                                                                                                                                                                                                                                                                                                                                                                                                                                                                                                                                                                                                                                                                                                                                                                                                                                                                                                                                                                                                                                                                                                                                                                                                                                                                                        |  |                |   |             |         |           |             |         |            |          |         |            |  |                      |   |             |                                                       |                       |             |                                                       |           |          |                                                       |  |  |                |   |             |           |                         |             |           |             |          |            |  |  |       |       |   |             |     |     |  |             |     |     |            |
| <i>IVT1</i>                                                                                                                                                                                                    | +10 or more: 25%<br>+9 to -9: 50%<br>-10 or more: 26%                                                                                                                                                                                                                                                                                                                                                                                                                                                                                                                                                                                                                                                                                                                                                                                                                                                                                                                                                                                                                                                                                                                                                                                                 | 0.03 vs L, NS vs IVT4                                                                                                                                                                                                                                                                                                                                                                                                                                                                                                                                                                                                                                                                                                                                                                                                                                                                                                                                                                                                                                                                                                                                                                                                                |                                                                                                                                                                                                                                                                                                                                                                                                                                                                                                                                                                                                                                                                                                                                                                                                                                                                                                                                                                                                                                                                                                                                                                                                                                                                                                                                                                                                                                                                                                                                                                                                                                                                                                                                                                                                                                                                                                                                                                                                        |  |                |   |             |         |           |             |         |            |          |         |            |  |                      |   |             |                                                       |                       |             |                                                       |           |          |                                                       |  |  |                |   |             |           |                         |             |           |             |          |            |  |  |       |       |   |             |     |     |  |             |     |     |            |
| <i>IVT4</i>                                                                                                                                                                                                    | +10 or more: 28%<br>+9 to -9: 44%<br>-10 or more: 28%                                                                                                                                                                                                                                                                                                                                                                                                                                                                                                                                                                                                                                                                                                                                                                                                                                                                                                                                                                                                                                                                                                                                                                                                 | 0.01 vs L                                                                                                                                                                                                                                                                                                                                                                                                                                                                                                                                                                                                                                                                                                                                                                                                                                                                                                                                                                                                                                                                                                                                                                                                                            |                                                                                                                                                                                                                                                                                                                                                                                                                                                                                                                                                                                                                                                                                                                                                                                                                                                                                                                                                                                                                                                                                                                                                                                                                                                                                                                                                                                                                                                                                                                                                                                                                                                                                                                                                                                                                                                                                                                                                                                                        |  |                |   |             |         |           |             |         |            |          |         |            |  |                      |   |             |                                                       |                       |             |                                                       |           |          |                                                       |  |  |                |   |             |           |                         |             |           |             |          |            |  |  |       |       |   |             |     |     |  |             |     |     |            |
| <i>L</i>                                                                                                                                                                                                       | +10 or more: 31%<br>+9 to -9: 50%<br>-10 or more: 19%                                                                                                                                                                                                                                                                                                                                                                                                                                                                                                                                                                                                                                                                                                                                                                                                                                                                                                                                                                                                                                                                                                                                                                                                 |                                                                                                                                                                                                                                                                                                                                                                                                                                                                                                                                                                                                                                                                                                                                                                                                                                                                                                                                                                                                                                                                                                                                                                                                                                      |                                                                                                                                                                                                                                                                                                                                                                                                                                                                                                                                                                                                                                                                                                                                                                                                                                                                                                                                                                                                                                                                                                                                                                                                                                                                                                                                                                                                                                                                                                                                                                                                                                                                                                                                                                                                                                                                                                                                                                                                        |  |                |   |             |         |           |             |         |            |          |         |            |  |                      |   |             |                                                       |                       |             |                                                       |           |          |                                                       |  |  |                |   |             |           |                         |             |           |             |          |            |  |  |       |       |   |             |     |     |  |             |     |     |            |
|                                                                                                                                                                                                                | CMT ( $\mu$ m)                                                                                                                                                                                                                                                                                                                                                                                                                                                                                                                                                                                                                                                                                                                                                                                                                                                                                                                                                                                                                                                                                                                                                                                                                                        | p                                                                                                                                                                                                                                                                                                                                                                                                                                                                                                                                                                                                                                                                                                                                                                                                                                                                                                                                                                                                                                                                                                                                                                                                                                    |                                                                                                                                                                                                                                                                                                                                                                                                                                                                                                                                                                                                                                                                                                                                                                                                                                                                                                                                                                                                                                                                                                                                                                                                                                                                                                                                                                                                                                                                                                                                                                                                                                                                                                                                                                                                                                                                                                                                                                                                        |  |                |   |             |         |           |             |         |            |          |         |            |  |                      |   |             |                                                       |                       |             |                                                       |           |          |                                                       |  |  |                |   |             |           |                         |             |           |             |          |            |  |  |       |       |   |             |     |     |  |             |     |     |            |
| <i>IVT1</i>                                                                                                                                                                                                    | -86 SD167                                                                                                                                                                                                                                                                                                                                                                                                                                                                                                                                                                                                                                                                                                                                                                                                                                                                                                                                                                                                                                                                                                                                                                                                                                             | <0.001 vs L, NS vs IVT4                                                                                                                                                                                                                                                                                                                                                                                                                                                                                                                                                                                                                                                                                                                                                                                                                                                                                                                                                                                                                                                                                                                                                                                                              |                                                                                                                                                                                                                                                                                                                                                                                                                                                                                                                                                                                                                                                                                                                                                                                                                                                                                                                                                                                                                                                                                                                                                                                                                                                                                                                                                                                                                                                                                                                                                                                                                                                                                                                                                                                                                                                                                                                                                                                                        |  |                |   |             |         |           |             |         |            |          |         |            |  |                      |   |             |                                                       |                       |             |                                                       |           |          |                                                       |  |  |                |   |             |           |                         |             |           |             |          |            |  |  |       |       |   |             |     |     |  |             |     |     |            |
| <i>IVT4</i>                                                                                                                                                                                                    | -77 SD160                                                                                                                                                                                                                                                                                                                                                                                                                                                                                                                                                                                                                                                                                                                                                                                                                                                                                                                                                                                                                                                                                                                                                                                                                                             | <0.001 vs L                                                                                                                                                                                                                                                                                                                                                                                                                                                                                                                                                                                                                                                                                                                                                                                                                                                                                                                                                                                                                                                                                                                                                                                                                          |                                                                                                                                                                                                                                                                                                                                                                                                                                                                                                                                                                                                                                                                                                                                                                                                                                                                                                                                                                                                                                                                                                                                                                                                                                                                                                                                                                                                                                                                                                                                                                                                                                                                                                                                                                                                                                                                                                                                                                                                        |  |                |   |             |         |           |             |         |            |          |         |            |  |                      |   |             |                                                       |                       |             |                                                       |           |          |                                                       |  |  |                |   |             |           |                         |             |           |             |          |            |  |  |       |       |   |             |     |     |  |             |     |     |            |
| <i>L</i>                                                                                                                                                                                                       | -139 SD148                                                                                                                                                                                                                                                                                                                                                                                                                                                                                                                                                                                                                                                                                                                                                                                                                                                                                                                                                                                                                                                                                                                                                                                                                                            |                                                                                                                                                                                                                                                                                                                                                                                                                                                                                                                                                                                                                                                                                                                                                                                                                                                                                                                                                                                                                                                                                                                                                                                                                                      |                                                                                                                                                                                                                                                                                                                                                                                                                                                                                                                                                                                                                                                                                                                                                                                                                                                                                                                                                                                                                                                                                                                                                                                                                                                                                                                                                                                                                                                                                                                                                                                                                                                                                                                                                                                                                                                                                                                                                                                                        |  |                |   |             |         |           |             |         |            |          |         |            |  |                      |   |             |                                                       |                       |             |                                                       |           |          |                                                       |  |  |                |   |             |           |                         |             |           |             |          |            |  |  |       |       |   |             |     |     |  |             |     |     |            |
|                                                                                                                                                                                                                | 2 yrs                                                                                                                                                                                                                                                                                                                                                                                                                                                                                                                                                                                                                                                                                                                                                                                                                                                                                                                                                                                                                                                                                                                                                                                                                                                 | 3 yrs                                                                                                                                                                                                                                                                                                                                                                                                                                                                                                                                                                                                                                                                                                                                                                                                                                                                                                                                                                                                                                                                                                                                                                                                                                | p                                                                                                                                                                                                                                                                                                                                                                                                                                                                                                                                                                                                                                                                                                                                                                                                                                                                                                                                                                                                                                                                                                                                                                                                                                                                                                                                                                                                                                                                                                                                                                                                                                                                                                                                                                                                                                                                                                                                                                                                      |  |                |   |             |         |           |             |         |            |          |         |            |  |                      |   |             |                                                       |                       |             |                                                       |           |          |                                                       |  |  |                |   |             |           |                         |             |           |             |          |            |  |  |       |       |   |             |     |     |  |             |     |     |            |
| <i>IVT1</i>                                                                                                                                                                                                    | 29%                                                                                                                                                                                                                                                                                                                                                                                                                                                                                                                                                                                                                                                                                                                                                                                                                                                                                                                                                                                                                                                                                                                                                                                                                                                   | 35%                                                                                                                                                                                                                                                                                                                                                                                                                                                                                                                                                                                                                                                                                                                                                                                                                                                                                                                                                                                                                                                                                                                                                                                                                                  |                                                                                                                                                                                                                                                                                                                                                                                                                                                                                                                                                                                                                                                                                                                                                                                                                                                                                                                                                                                                                                                                                                                                                                                                                                                                                                                                                                                                                                                                                                                                                                                                                                                                                                                                                                                                                                                                                                                                                                                                        |  |                |   |             |         |           |             |         |            |          |         |            |  |                      |   |             |                                                       |                       |             |                                                       |           |          |                                                       |  |  |                |   |             |           |                         |             |           |             |          |            |  |  |       |       |   |             |     |     |  |             |     |     |            |
| <i>IVT4</i>                                                                                                                                                                                                    | 21%                                                                                                                                                                                                                                                                                                                                                                                                                                                                                                                                                                                                                                                                                                                                                                                                                                                                                                                                                                                                                                                                                                                                                                                                                                                   | 30%                                                                                                                                                                                                                                                                                                                                                                                                                                                                                                                                                                                                                                                                                                                                                                                                                                                                                                                                                                                                                                                                                                                                                                                                                                  | <0.05 vs L                                                                                                                                                                                                                                                                                                                                                                                                                                                                                                                                                                                                                                                                                                                                                                                                                                                                                                                                                                                                                                                                                                                                                                                                                                                                                                                                                                                                                                                                                                                                                                                                                                                                                                                                                                                                                                                                                                                                                                                             |  |                |   |             |         |           |             |         |            |          |         |            |  |                      |   |             |                                                       |                       |             |                                                       |           |          |                                                       |  |  |                |   |             |           |                         |             |           |             |          |            |  |  |       |       |   |             |     |     |  |             |     |     |            |

|                                                                                                                                                                                                          |                                                                                                                                                                                                                                                                                                                                                                                                                                                                                                                                                                                                                                                                                                                                                                                                                                                                                                                                                                                                                                                                                           |                                                                                                                                                                                                                                                                                                                                                                                                                                                                                                                                                                                                                                                                                                                                                                      | <i>L</i> 31% 37%                                                                                                                                                                                                                                                                                                                                                                                                                                                                                                                                                                                                                                                                                                                                                                                                                                                                                                                                                                                                                    |  |                |   |             |       |           |          |       |  |  |      |   |              |     |     |           |     |     |              |     |     |  |                       |   |             |      |                                                                         |          |     |  |
|----------------------------------------------------------------------------------------------------------------------------------------------------------------------------------------------------------|-------------------------------------------------------------------------------------------------------------------------------------------------------------------------------------------------------------------------------------------------------------------------------------------------------------------------------------------------------------------------------------------------------------------------------------------------------------------------------------------------------------------------------------------------------------------------------------------------------------------------------------------------------------------------------------------------------------------------------------------------------------------------------------------------------------------------------------------------------------------------------------------------------------------------------------------------------------------------------------------------------------------------------------------------------------------------------------------|----------------------------------------------------------------------------------------------------------------------------------------------------------------------------------------------------------------------------------------------------------------------------------------------------------------------------------------------------------------------------------------------------------------------------------------------------------------------------------------------------------------------------------------------------------------------------------------------------------------------------------------------------------------------------------------------------------------------------------------------------------------------|-------------------------------------------------------------------------------------------------------------------------------------------------------------------------------------------------------------------------------------------------------------------------------------------------------------------------------------------------------------------------------------------------------------------------------------------------------------------------------------------------------------------------------------------------------------------------------------------------------------------------------------------------------------------------------------------------------------------------------------------------------------------------------------------------------------------------------------------------------------------------------------------------------------------------------------------------------------------------------------------------------------------------------------|--|----------------|---|-------------|-------|-----------|----------|-------|--|--|------|---|--------------|-----|-----|-----------|-----|-----|--------------|-----|-----|--|-----------------------|---|-------------|------|-------------------------------------------------------------------------|----------|-----|--|
| <p><b>Gillies 2006 / 2007 / 2009 / Sutter 2004</b> [32,137-139]<br/> <b>Australia</b></p> <p><b>Design:</b> 2-arm placebo-controlled RCT<br/> <b>Follow-up:</b> 2 years, additional 3-year follow-up</p> | <p><b>N:</b> 69 eyes of 43 patients<br/> <b>Inclusion criteria:</b> patients with persistent (<math>\geq 3</math> months after adequate laser treatment) DMO involving the central fovea, BCVA in the affected eye <math>\leq 6/9</math><br/> <b>Exclusion criteria:</b> uncontrolled glaucoma, loss of vision due to other causes, systemic treatment with <math>&gt;5</math> mg prednisolone (or equivalent) daily, intercurrent severe systemic disease, any condition affecting follow-up or documentation<br/> <b>Age:</b> 62.4 to 69.6 SD9.2 to 12.5 years<br/> <b>Sex:</b> 52% female<br/> <b>Diabetes type:</b> not reported<br/> <b>HbA1c:</b> 7.63 to 8.28 SD1.12 to 1.41<br/> <b>Baseline VA:</b> ETDRS letter score 60.5 to 61.3 SD11.9 to 13.2<br/> <b>Baseline CMT:</b> 439 to 444 SD101 to 125 <math>\mu\text{m}</math><br/> <b>Comorbidities:</b> 25% pseudophakic</p>                                                                                                                                                                                                    | <p><b>Group 1 (IVT, n=34 eyes):</b> 4 mg (0.1 ml) IV triamcinolone acetonide (mean 2.6 injections over 2 years)<br/> <b>Group 2 (C, n=35 eyes):</b> placebo injection (subconjunctival saline injection) (mean 1.8 injections over 2 years)<br/> <b>Regimen for all groups:</b> retreatment considered at each visit as long as treatments were at least 6 months apart (retreatment if VA decreased <math>\geq 5</math> letters from previous peak value and persistent CMT <math>&gt;250 \mu\text{m}</math>), if no improvement after 4 weeks, further laser treatment was applied (n=1 laser treatment in intervention group, n=16 in placebo group, p=0.0001)<br/> <b>Laser ETDRS protocol</b></p>                                                               | <p><b>At 2 years</b></p> <p><b>BCVA (ETDRS):</b></p> <table border="1"> <thead> <tr> <th></th> <th>BCVA (letters)</th> <th>p</th> </tr> </thead> <tbody> <tr> <td><i>IVT</i></td> <td>+3.1</td> <td>0.01 vs C</td> </tr> <tr> <td><i>C</i></td> <td>-2.9</td> <td></td> </tr> </tbody> </table> <p><b>CVA gain categories</b></p> <table border="1"> <thead> <tr> <th></th> <th>IVT</th> <th>C</th> </tr> </thead> <tbody> <tr> <td>+10 or more:</td> <td>21%</td> <td>12%</td> </tr> <tr> <td>+9 to -9:</td> <td>70%</td> <td>62%</td> </tr> <tr> <td>-10 or more:</td> <td>9%</td> <td>25%</td> </tr> </tbody> </table> <p><b>CMT (OCT):</b></p> <table border="1"> <thead> <tr> <th></th> <th>CMT (<math>\mu\text{m}</math>)</th> <th>p</th> </tr> </thead> <tbody> <tr> <td><i>IVT</i></td> <td>-125</td> <td>0.009 vs C, difference between groups 59 <math>\mu\text{m}</math> (95% CI 15, 104)</td> </tr> <tr> <td><i>C</i></td> <td>-75</td> <td></td> </tr> </tbody> </table>                                               |  | BCVA (letters) | p | <i>IVT</i>  | +3.1  | 0.01 vs C | <i>C</i> | -2.9  |  |  | IVT  | C | +10 or more: | 21% | 12% | +9 to -9: | 70% | 62% | -10 or more: | 9%  | 25% |  | CMT ( $\mu\text{m}$ ) | p | <i>IVT</i>  | -125 | 0.009 vs C, difference between groups 59 $\mu\text{m}$ (95% CI 15, 104) | <i>C</i> | -75 |  |
|                                                                                                                                                                                                          | BCVA (letters)                                                                                                                                                                                                                                                                                                                                                                                                                                                                                                                                                                                                                                                                                                                                                                                                                                                                                                                                                                                                                                                                            | p                                                                                                                                                                                                                                                                                                                                                                                                                                                                                                                                                                                                                                                                                                                                                                    |                                                                                                                                                                                                                                                                                                                                                                                                                                                                                                                                                                                                                                                                                                                                                                                                                                                                                                                                                                                                                                     |  |                |   |             |       |           |          |       |  |  |      |   |              |     |     |           |     |     |              |     |     |  |                       |   |             |      |                                                                         |          |     |  |
| <i>IVT</i>                                                                                                                                                                                               | +3.1                                                                                                                                                                                                                                                                                                                                                                                                                                                                                                                                                                                                                                                                                                                                                                                                                                                                                                                                                                                                                                                                                      | 0.01 vs C                                                                                                                                                                                                                                                                                                                                                                                                                                                                                                                                                                                                                                                                                                                                                            |                                                                                                                                                                                                                                                                                                                                                                                                                                                                                                                                                                                                                                                                                                                                                                                                                                                                                                                                                                                                                                     |  |                |   |             |       |           |          |       |  |  |      |   |              |     |     |           |     |     |              |     |     |  |                       |   |             |      |                                                                         |          |     |  |
| <i>C</i>                                                                                                                                                                                                 | -2.9                                                                                                                                                                                                                                                                                                                                                                                                                                                                                                                                                                                                                                                                                                                                                                                                                                                                                                                                                                                                                                                                                      |                                                                                                                                                                                                                                                                                                                                                                                                                                                                                                                                                                                                                                                                                                                                                                      |                                                                                                                                                                                                                                                                                                                                                                                                                                                                                                                                                                                                                                                                                                                                                                                                                                                                                                                                                                                                                                     |  |                |   |             |       |           |          |       |  |  |      |   |              |     |     |           |     |     |              |     |     |  |                       |   |             |      |                                                                         |          |     |  |
|                                                                                                                                                                                                          | IVT                                                                                                                                                                                                                                                                                                                                                                                                                                                                                                                                                                                                                                                                                                                                                                                                                                                                                                                                                                                                                                                                                       | C                                                                                                                                                                                                                                                                                                                                                                                                                                                                                                                                                                                                                                                                                                                                                                    |                                                                                                                                                                                                                                                                                                                                                                                                                                                                                                                                                                                                                                                                                                                                                                                                                                                                                                                                                                                                                                     |  |                |   |             |       |           |          |       |  |  |      |   |              |     |     |           |     |     |              |     |     |  |                       |   |             |      |                                                                         |          |     |  |
| +10 or more:                                                                                                                                                                                             | 21%                                                                                                                                                                                                                                                                                                                                                                                                                                                                                                                                                                                                                                                                                                                                                                                                                                                                                                                                                                                                                                                                                       | 12%                                                                                                                                                                                                                                                                                                                                                                                                                                                                                                                                                                                                                                                                                                                                                                  |                                                                                                                                                                                                                                                                                                                                                                                                                                                                                                                                                                                                                                                                                                                                                                                                                                                                                                                                                                                                                                     |  |                |   |             |       |           |          |       |  |  |      |   |              |     |     |           |     |     |              |     |     |  |                       |   |             |      |                                                                         |          |     |  |
| +9 to -9:                                                                                                                                                                                                | 70%                                                                                                                                                                                                                                                                                                                                                                                                                                                                                                                                                                                                                                                                                                                                                                                                                                                                                                                                                                                                                                                                                       | 62%                                                                                                                                                                                                                                                                                                                                                                                                                                                                                                                                                                                                                                                                                                                                                                  |                                                                                                                                                                                                                                                                                                                                                                                                                                                                                                                                                                                                                                                                                                                                                                                                                                                                                                                                                                                                                                     |  |                |   |             |       |           |          |       |  |  |      |   |              |     |     |           |     |     |              |     |     |  |                       |   |             |      |                                                                         |          |     |  |
| -10 or more:                                                                                                                                                                                             | 9%                                                                                                                                                                                                                                                                                                                                                                                                                                                                                                                                                                                                                                                                                                                                                                                                                                                                                                                                                                                                                                                                                        | 25%                                                                                                                                                                                                                                                                                                                                                                                                                                                                                                                                                                                                                                                                                                                                                                  |                                                                                                                                                                                                                                                                                                                                                                                                                                                                                                                                                                                                                                                                                                                                                                                                                                                                                                                                                                                                                                     |  |                |   |             |       |           |          |       |  |  |      |   |              |     |     |           |     |     |              |     |     |  |                       |   |             |      |                                                                         |          |     |  |
|                                                                                                                                                                                                          | CMT ( $\mu\text{m}$ )                                                                                                                                                                                                                                                                                                                                                                                                                                                                                                                                                                                                                                                                                                                                                                                                                                                                                                                                                                                                                                                                     | p                                                                                                                                                                                                                                                                                                                                                                                                                                                                                                                                                                                                                                                                                                                                                                    |                                                                                                                                                                                                                                                                                                                                                                                                                                                                                                                                                                                                                                                                                                                                                                                                                                                                                                                                                                                                                                     |  |                |   |             |       |           |          |       |  |  |      |   |              |     |     |           |     |     |              |     |     |  |                       |   |             |      |                                                                         |          |     |  |
| <i>IVT</i>                                                                                                                                                                                               | -125                                                                                                                                                                                                                                                                                                                                                                                                                                                                                                                                                                                                                                                                                                                                                                                                                                                                                                                                                                                                                                                                                      | 0.009 vs C, difference between groups 59 $\mu\text{m}$ (95% CI 15, 104)                                                                                                                                                                                                                                                                                                                                                                                                                                                                                                                                                                                                                                                                                              |                                                                                                                                                                                                                                                                                                                                                                                                                                                                                                                                                                                                                                                                                                                                                                                                                                                                                                                                                                                                                                     |  |                |   |             |       |           |          |       |  |  |      |   |              |     |     |           |     |     |              |     |     |  |                       |   |             |      |                                                                         |          |     |  |
| <i>C</i>                                                                                                                                                                                                 | -75                                                                                                                                                                                                                                                                                                                                                                                                                                                                                                                                                                                                                                                                                                                                                                                                                                                                                                                                                                                                                                                                                       |                                                                                                                                                                                                                                                                                                                                                                                                                                                                                                                                                                                                                                                                                                                                                                      |                                                                                                                                                                                                                                                                                                                                                                                                                                                                                                                                                                                                                                                                                                                                                                                                                                                                                                                                                                                                                                     |  |                |   |             |       |           |          |       |  |  |      |   |              |     |     |           |     |     |              |     |     |  |                       |   |             |      |                                                                         |          |     |  |
| <p><b>Gillies 2011</b>[33]<br/> <b>Australia</b></p> <p><b>Design:</b> 2-arm RCT<br/> <b>Follow-up:</b> 24 months</p>                                                                                    | <p><b>N:</b> 84 eyes of 54 patients<br/> <b>Inclusion criteria:</b> DMO involving the central fovea, CMT <math>\geq 250 \mu\text{m}</math>, BCVA 17 to 70 letters (~20/40 to 20/400), laser treatment could be safely delayed for 6 weeks without significant adverse effects<br/> <b>Exclusion criteria:</b> uncontrolled glaucoma, controlled glaucoma but with a glaucomatous visual field defect, loss of vision resulting from other causes, systemic treatment with <math>&gt;5</math> mg prednisolone (or equivalent) daily, retinal laser treatment within 4 months, intraocular surgery within 6 months, concurrent severe systemic disease, any condition affecting follow-up or documentation<br/> <b>Age:</b> 65.4 to 66.9 SD8.9 to 9.5 years<br/> <b>Sex:</b> 38.1 to 47.6% female<br/> <b>Diabetes type:</b> not reported<br/> <b>HbA1c:</b> 7.81 to 8.02 SD1.44 to 1.63 %<br/> <b>Baseline VA:</b> letter score 55.2 to 55.5 SD11.3 to 12.5<br/> <b>Baseline CMT:</b> 482.1 to 477.4 SD122.7 to 155.5 <math>\mu\text{m}</math><br/> <b>Comorbidities:</b> not reported</p> | <p><b>Group 1 (IVTL, n=42 eyes):</b> 4 mg (0.1 ml) IV triamcinolone acetonide followed by laser treatment (at least 1 retreatment in 2<sup>nd</sup> year in 69%)<br/> <b>Group 2 (L, n=42 eyes):</b> sham injection followed by laser treatment (at least 1 retreatment in 2<sup>nd</sup> year in 45%)<br/> <b>Regimen for all groups:</b> retreatment with injection followed by laser at discretion of chief investigator, with at least 6 weeks between treatments; no retreatment if: (1) investigator considered the macula nearly flat and CMT <math>&lt;300 \mu\text{m}</math>; (2) VA was <math>\geq 79</math> letters (20/25) or VA had improved by <math>\geq 5</math> letters compared with the best VA after treatment or baseline acuity; (3) laser</p> | <p><b>At 24 months</b></p> <p><b>BCVA (ETDRS):</b></p> <table border="1"> <thead> <tr> <th></th> <th>BCVA (letters)</th> <th>p</th> </tr> </thead> <tbody> <tr> <td><i>I TL</i></td> <td>+0.76</td> <td>NS vs L</td> </tr> <tr> <td><i>L</i></td> <td>-1.49</td> <td></td> </tr> </tbody> </table> <p><b>BCVA gain categories</b></p> <table border="1"> <thead> <tr> <th></th> <th>IVTL</th> <th>L</th> </tr> </thead> <tbody> <tr> <td>+10 or more:</td> <td>36%</td> <td>17%</td> </tr> <tr> <td>+9 to -9:</td> <td>31%</td> <td>59%</td> </tr> <tr> <td>-10 or more:</td> <td>33%</td> <td>24%</td> </tr> </tbody> </table> <p>Subgroups:</p> <ul style="list-style-type: none"> <li>BCVA outcome not significantly affected by cataract surgery</li> </ul> <p><b>CMT (OCT):</b></p> <table border="1"> <thead> <tr> <th></th> <th>CMT (<math>\mu\text{m}</math>)</th> <th>p</th> </tr> </thead> <tbody> <tr> <td><i>I TL</i></td> <td></td> <td></td> </tr> <tr> <td><i>L</i></td> <td></td> <td></td> </tr> </tbody> </table> |  | BCVA (letters) | p | <i>I TL</i> | +0.76 | NS vs L   | <i>L</i> | -1.49 |  |  | IVTL | L | +10 or more: | 36% | 17% | +9 to -9: | 31% | 59% | -10 or more: | 33% | 24% |  | CMT ( $\mu\text{m}$ ) | p | <i>I TL</i> |      |                                                                         | <i>L</i> |     |  |
|                                                                                                                                                                                                          | BCVA (letters)                                                                                                                                                                                                                                                                                                                                                                                                                                                                                                                                                                                                                                                                                                                                                                                                                                                                                                                                                                                                                                                                            | p                                                                                                                                                                                                                                                                                                                                                                                                                                                                                                                                                                                                                                                                                                                                                                    |                                                                                                                                                                                                                                                                                                                                                                                                                                                                                                                                                                                                                                                                                                                                                                                                                                                                                                                                                                                                                                     |  |                |   |             |       |           |          |       |  |  |      |   |              |     |     |           |     |     |              |     |     |  |                       |   |             |      |                                                                         |          |     |  |
| <i>I TL</i>                                                                                                                                                                                              | +0.76                                                                                                                                                                                                                                                                                                                                                                                                                                                                                                                                                                                                                                                                                                                                                                                                                                                                                                                                                                                                                                                                                     | NS vs L                                                                                                                                                                                                                                                                                                                                                                                                                                                                                                                                                                                                                                                                                                                                                              |                                                                                                                                                                                                                                                                                                                                                                                                                                                                                                                                                                                                                                                                                                                                                                                                                                                                                                                                                                                                                                     |  |                |   |             |       |           |          |       |  |  |      |   |              |     |     |           |     |     |              |     |     |  |                       |   |             |      |                                                                         |          |     |  |
| <i>L</i>                                                                                                                                                                                                 | -1.49                                                                                                                                                                                                                                                                                                                                                                                                                                                                                                                                                                                                                                                                                                                                                                                                                                                                                                                                                                                                                                                                                     |                                                                                                                                                                                                                                                                                                                                                                                                                                                                                                                                                                                                                                                                                                                                                                      |                                                                                                                                                                                                                                                                                                                                                                                                                                                                                                                                                                                                                                                                                                                                                                                                                                                                                                                                                                                                                                     |  |                |   |             |       |           |          |       |  |  |      |   |              |     |     |           |     |     |              |     |     |  |                       |   |             |      |                                                                         |          |     |  |
|                                                                                                                                                                                                          | IVTL                                                                                                                                                                                                                                                                                                                                                                                                                                                                                                                                                                                                                                                                                                                                                                                                                                                                                                                                                                                                                                                                                      | L                                                                                                                                                                                                                                                                                                                                                                                                                                                                                                                                                                                                                                                                                                                                                                    |                                                                                                                                                                                                                                                                                                                                                                                                                                                                                                                                                                                                                                                                                                                                                                                                                                                                                                                                                                                                                                     |  |                |   |             |       |           |          |       |  |  |      |   |              |     |     |           |     |     |              |     |     |  |                       |   |             |      |                                                                         |          |     |  |
| +10 or more:                                                                                                                                                                                             | 36%                                                                                                                                                                                                                                                                                                                                                                                                                                                                                                                                                                                                                                                                                                                                                                                                                                                                                                                                                                                                                                                                                       | 17%                                                                                                                                                                                                                                                                                                                                                                                                                                                                                                                                                                                                                                                                                                                                                                  |                                                                                                                                                                                                                                                                                                                                                                                                                                                                                                                                                                                                                                                                                                                                                                                                                                                                                                                                                                                                                                     |  |                |   |             |       |           |          |       |  |  |      |   |              |     |     |           |     |     |              |     |     |  |                       |   |             |      |                                                                         |          |     |  |
| +9 to -9:                                                                                                                                                                                                | 31%                                                                                                                                                                                                                                                                                                                                                                                                                                                                                                                                                                                                                                                                                                                                                                                                                                                                                                                                                                                                                                                                                       | 59%                                                                                                                                                                                                                                                                                                                                                                                                                                                                                                                                                                                                                                                                                                                                                                  |                                                                                                                                                                                                                                                                                                                                                                                                                                                                                                                                                                                                                                                                                                                                                                                                                                                                                                                                                                                                                                     |  |                |   |             |       |           |          |       |  |  |      |   |              |     |     |           |     |     |              |     |     |  |                       |   |             |      |                                                                         |          |     |  |
| -10 or more:                                                                                                                                                                                             | 33%                                                                                                                                                                                                                                                                                                                                                                                                                                                                                                                                                                                                                                                                                                                                                                                                                                                                                                                                                                                                                                                                                       | 24%                                                                                                                                                                                                                                                                                                                                                                                                                                                                                                                                                                                                                                                                                                                                                                  |                                                                                                                                                                                                                                                                                                                                                                                                                                                                                                                                                                                                                                                                                                                                                                                                                                                                                                                                                                                                                                     |  |                |   |             |       |           |          |       |  |  |      |   |              |     |     |           |     |     |              |     |     |  |                       |   |             |      |                                                                         |          |     |  |
|                                                                                                                                                                                                          | CMT ( $\mu\text{m}$ )                                                                                                                                                                                                                                                                                                                                                                                                                                                                                                                                                                                                                                                                                                                                                                                                                                                                                                                                                                                                                                                                     | p                                                                                                                                                                                                                                                                                                                                                                                                                                                                                                                                                                                                                                                                                                                                                                    |                                                                                                                                                                                                                                                                                                                                                                                                                                                                                                                                                                                                                                                                                                                                                                                                                                                                                                                                                                                                                                     |  |                |   |             |       |           |          |       |  |  |      |   |              |     |     |           |     |     |              |     |     |  |                       |   |             |      |                                                                         |          |     |  |
| <i>I TL</i>                                                                                                                                                                                              |                                                                                                                                                                                                                                                                                                                                                                                                                                                                                                                                                                                                                                                                                                                                                                                                                                                                                                                                                                                                                                                                                           |                                                                                                                                                                                                                                                                                                                                                                                                                                                                                                                                                                                                                                                                                                                                                                      |                                                                                                                                                                                                                                                                                                                                                                                                                                                                                                                                                                                                                                                                                                                                                                                                                                                                                                                                                                                                                                     |  |                |   |             |       |           |          |       |  |  |      |   |              |     |     |           |     |     |              |     |     |  |                       |   |             |      |                                                                         |          |     |  |
| <i>L</i>                                                                                                                                                                                                 |                                                                                                                                                                                                                                                                                                                                                                                                                                                                                                                                                                                                                                                                                                                                                                                                                                                                                                                                                                                                                                                                                           |                                                                                                                                                                                                                                                                                                                                                                                                                                                                                                                                                                                                                                                                                                                                                                      |                                                                                                                                                                                                                                                                                                                                                                                                                                                                                                                                                                                                                                                                                                                                                                                                                                                                                                                                                                                                                                     |  |                |   |             |       |           |          |       |  |  |      |   |              |     |     |           |     |     |              |     |     |  |                       |   |             |      |                                                                         |          |     |  |



1  
2  
3  
4  
5  
6  
7  
8  
9  
10  
11  
12  
13  
14  
15  
16  
17  
18  
19  
20  
21  
22  
23  
24  
25  
26  
27  
28  
29  
30  
31  
32  
33  
34  
35  
36  
37  
38  
39  
40  
41  
42  
43  
44  
45  
46  
47  
48  
49

|                                                                                                                                  |                                                                                                                                                                                                                                                                                                                                                                                                                                                                                                                                                                                                                                                                                                                                                                                                                              | treatment was considered by the investigator as inappropriate or had no potential for improvement                                                                                                                                                                                                                                                                                                                                                                                                                                                                                                                                                               | <table border="1"> <tr> <td><i>IVTL</i></td> <td>-137.1</td> <td>NS vs L</td> </tr> <tr> <td><i>L</i></td> <td>-109.6</td> <td></td> </tr> </table>                                                                                                                                                                                                                                                                                                                                                                                                                                                                                                                                                                                                                                                                                                                                      | <i>IVTL</i> | -137.1            | NS vs L | <i>L</i>   | -109.6                                    |                   |             |                                           |              |                             |                                           |  |            |              |   |             |                 |                                      |             |                  |                   |          |                 |  |
|----------------------------------------------------------------------------------------------------------------------------------|------------------------------------------------------------------------------------------------------------------------------------------------------------------------------------------------------------------------------------------------------------------------------------------------------------------------------------------------------------------------------------------------------------------------------------------------------------------------------------------------------------------------------------------------------------------------------------------------------------------------------------------------------------------------------------------------------------------------------------------------------------------------------------------------------------------------------|-----------------------------------------------------------------------------------------------------------------------------------------------------------------------------------------------------------------------------------------------------------------------------------------------------------------------------------------------------------------------------------------------------------------------------------------------------------------------------------------------------------------------------------------------------------------------------------------------------------------------------------------------------------------|------------------------------------------------------------------------------------------------------------------------------------------------------------------------------------------------------------------------------------------------------------------------------------------------------------------------------------------------------------------------------------------------------------------------------------------------------------------------------------------------------------------------------------------------------------------------------------------------------------------------------------------------------------------------------------------------------------------------------------------------------------------------------------------------------------------------------------------------------------------------------------------|-------------|-------------------|---------|------------|-------------------------------------------|-------------------|-------------|-------------------------------------------|--------------|-----------------------------|-------------------------------------------|--|------------|--------------|---|-------------|-----------------|--------------------------------------|-------------|------------------|-------------------|----------|-----------------|--|
| <i>IVTL</i>                                                                                                                      | -137.1                                                                                                                                                                                                                                                                                                                                                                                                                                                                                                                                                                                                                                                                                                                                                                                                                       | NS vs L                                                                                                                                                                                                                                                                                                                                                                                                                                                                                                                                                                                                                                                         |                                                                                                                                                                                                                                                                                                                                                                                                                                                                                                                                                                                                                                                                                                                                                                                                                                                                                          |             |                   |         |            |                                           |                   |             |                                           |              |                             |                                           |  |            |              |   |             |                 |                                      |             |                  |                   |          |                 |  |
| <i>L</i>                                                                                                                         | -109.6                                                                                                                                                                                                                                                                                                                                                                                                                                                                                                                                                                                                                                                                                                                                                                                                                       |                                                                                                                                                                                                                                                                                                                                                                                                                                                                                                                                                                                                                                                                 |                                                                                                                                                                                                                                                                                                                                                                                                                                                                                                                                                                                                                                                                                                                                                                                                                                                                                          |             |                   |         |            |                                           |                   |             |                                           |              |                             |                                           |  |            |              |   |             |                 |                                      |             |                  |                   |          |                 |  |
| <p><b>Kim 2010</b>[45]<br/><b>Korea</b></p> <p><b>Design:</b> 2-arm RCT<br/><b>Follow-up:</b> 3 years</p>                        | <p><b>N:</b> 86 eyes of 75 patients<br/><b>Inclusion criteria:</b> diffuse DMO<br/><b>Exclusion criteria:</b> not reported<br/><b>Age:</b> not reported<br/><b>Sex:</b> not reported<br/><b>Diabetes type:</b> not reported<br/><b>HbA1c:</b> not reported<br/><b>Baseline VA:</b> not reported<br/><b>Baseline CMT:</b> not reported<br/><b>Comorbidities:</b> not reported</p>                                                                                                                                                                                                                                                                                                                                                                                                                                             | <p><b>Group 1 (IVT, n=38 eyes):</b> 4 mg IV triamcinolone (1.88 additional treatments, completion 68.1%)<br/><b>Group 2 (IVTL, n=48 eyes):</b> macular laser photocoagulation 4 weeks after 4 mg IV triamcinolone (0.92 additional treatments, completion 77.1%)<br/><b>Regimen for all groups:</b> additional treatment possible, criteria not mentioned<br/><b>Laser protocol</b> not reported</p>                                                                                                                                                                                                                                                            | <p><b>At 3 years</b><br/><b>BCVA:</b> not reported</p> <p><b>Outcomes related to DMO:</b></p> <table border="1"> <thead> <tr> <th></th> <th>no DMO recurrence</th> <th>p</th> </tr> </thead> <tbody> <tr> <td><i>IVT</i></td> <td>3.9%</td> <td></td> </tr> <tr> <td><i>IVTL</i></td> <td>24.3%</td> <td>0.028 vs IVT</td> </tr> <tr> <td colspan="3"><b>time DMO not present</b></td> </tr> <tr> <td><i>IVT</i></td> <td>10.33 months</td> <td></td> </tr> <tr> <td><i>IVTL</i></td> <td>19.88 months</td> <td>0.027 vs IVT</td> </tr> </tbody> </table>                                                                                                                                                                                                                                                                                                                                |             | no DMO recurrence | p       | <i>IVT</i> | 3.9%                                      |                   | <i>IVTL</i> | 24.3%                                     | 0.028 vs IVT | <b>time DMO not present</b> |                                           |  | <i>IVT</i> | 10.33 months |   | <i>IVTL</i> | 19.88 months    | 0.027 vs IVT                         |             |                  |                   |          |                 |  |
|                                                                                                                                  | no DMO recurrence                                                                                                                                                                                                                                                                                                                                                                                                                                                                                                                                                                                                                                                                                                                                                                                                            | p                                                                                                                                                                                                                                                                                                                                                                                                                                                                                                                                                                                                                                                               |                                                                                                                                                                                                                                                                                                                                                                                                                                                                                                                                                                                                                                                                                                                                                                                                                                                                                          |             |                   |         |            |                                           |                   |             |                                           |              |                             |                                           |  |            |              |   |             |                 |                                      |             |                  |                   |          |                 |  |
| <i>IVT</i>                                                                                                                       | 3.9%                                                                                                                                                                                                                                                                                                                                                                                                                                                                                                                                                                                                                                                                                                                                                                                                                         |                                                                                                                                                                                                                                                                                                                                                                                                                                                                                                                                                                                                                                                                 |                                                                                                                                                                                                                                                                                                                                                                                                                                                                                                                                                                                                                                                                                                                                                                                                                                                                                          |             |                   |         |            |                                           |                   |             |                                           |              |                             |                                           |  |            |              |   |             |                 |                                      |             |                  |                   |          |                 |  |
| <i>IVTL</i>                                                                                                                      | 24.3%                                                                                                                                                                                                                                                                                                                                                                                                                                                                                                                                                                                                                                                                                                                                                                                                                        | 0.028 vs IVT                                                                                                                                                                                                                                                                                                                                                                                                                                                                                                                                                                                                                                                    |                                                                                                                                                                                                                                                                                                                                                                                                                                                                                                                                                                                                                                                                                                                                                                                                                                                                                          |             |                   |         |            |                                           |                   |             |                                           |              |                             |                                           |  |            |              |   |             |                 |                                      |             |                  |                   |          |                 |  |
| <b>time DMO not present</b>                                                                                                      |                                                                                                                                                                                                                                                                                                                                                                                                                                                                                                                                                                                                                                                                                                                                                                                                                              |                                                                                                                                                                                                                                                                                                                                                                                                                                                                                                                                                                                                                                                                 |                                                                                                                                                                                                                                                                                                                                                                                                                                                                                                                                                                                                                                                                                                                                                                                                                                                                                          |             |                   |         |            |                                           |                   |             |                                           |              |                             |                                           |  |            |              |   |             |                 |                                      |             |                  |                   |          |                 |  |
| <i>IVT</i>                                                                                                                       | 10.33 months                                                                                                                                                                                                                                                                                                                                                                                                                                                                                                                                                                                                                                                                                                                                                                                                                 |                                                                                                                                                                                                                                                                                                                                                                                                                                                                                                                                                                                                                                                                 |                                                                                                                                                                                                                                                                                                                                                                                                                                                                                                                                                                                                                                                                                                                                                                                                                                                                                          |             |                   |         |            |                                           |                   |             |                                           |              |                             |                                           |  |            |              |   |             |                 |                                      |             |                  |                   |          |                 |  |
| <i>IVTL</i>                                                                                                                      | 19.88 months                                                                                                                                                                                                                                                                                                                                                                                                                                                                                                                                                                                                                                                                                                                                                                                                                 | 0.027 vs IVT                                                                                                                                                                                                                                                                                                                                                                                                                                                                                                                                                                                                                                                    |                                                                                                                                                                                                                                                                                                                                                                                                                                                                                                                                                                                                                                                                                                                                                                                                                                                                                          |             |                   |         |            |                                           |                   |             |                                           |              |                             |                                           |  |            |              |   |             |                 |                                      |             |                  |                   |          |                 |  |
| <p><b>Lam 2007</b>[34]<br/><b>Hong Kong</b></p> <p><b>Design:</b> 3-arm RCT<br/><b>Follow-up:</b> 6 months (2 years planned)</p> | <p><b>N:</b> 111 eyes of 111 patients<br/><b>Inclusion criteria:</b> &gt;18 years, type 1 or 2 DM, clinically significant DMO (ETDRS), CMT ≥250 μm<br/><b>Exclusion criteria:</b> macular oedema due to causes other than diabetic maculopathy, signs of vitreomacular traction, proliferative diabetic retinopathy, aphakia, history of glaucoma or ocular hypertension, macular ischemia, any laser procedure within 3 months, ocular surgery within 6 months, significant media opacities<br/><b>Age:</b> 64.7 to 67.2 SD8.2 to 10.3 years<br/><b>Sex:</b> 42 to 59% female<br/><b>Diabetes type:</b> not reported<br/><b>HbA1c:</b> not reported<br/><b>Baseline VA:</b> ETDRS logMAR 0.64 to 0.72 SD0.34 to 0.36<br/><b>Baseline CMT:</b> 385 to 424 SD91 to 108 μm<br/><b>Comorbidities:</b> 66 to 84% phakic eyes</p> | <p><b>Group 1 (IVT, n=38 eyes):</b> 4 mg IV triamcinolone (no retreatments)<br/><b>Group 2 (IVTL, n=36 eyes):</b> 4 mg IV triamcinolone followed by grid laser photocoagulation (ETDRS) (laser treatment once the macular oedema had reduced to &lt;250 μm at the foveal center or at 1 to 2 months after injection, whichever was earlier)<br/><b>Group 3 (L, n=37 eyes):</b> grid laser photocoagulation (n=3 retreatments) (no retreatments)<br/><b>Regimen for all groups:</b> in case of recurrence or persistence of macular oedema, retreatment offered according to study group, at intervals no less than 4 months<br/><b>Laser ETDRS protocol</b></p> | <p><b>At 6 months</b><br/><b>BCVA (ETDRS):</b></p> <table border="1"> <thead> <tr> <th></th> <th>BCVA improvement</th> <th>p</th> </tr> </thead> <tbody> <tr> <td><i>IVT</i></td> <td>-0.7 SD 10.7 log MAR plus ≥15 letters: 5%</td> <td>NS between groups</td> </tr> <tr> <td><i>IVTL</i></td> <td>-1.1 SD 10.8 log MAR plus ≥15 letters: 3%</td> <td></td> </tr> <tr> <td><i>L</i></td> <td>-1.6 SD 11.5 log MAR plus ≥15 letters: 5%</td> <td></td> </tr> </tbody> </table> <p><b>CMT (OCT):</b></p> <table border="1"> <thead> <tr> <th></th> <th>CMT (μm)</th> <th>p</th> </tr> </thead> <tbody> <tr> <td><i>IVT</i></td> <td>342 SD124 [-54]</td> <td>NS between groups, &lt;0.01 vs baseline</td> </tr> <tr> <td><i>IVTL</i></td> <td>307 SD181 [-116]</td> <td>&lt;0.01 vs baseline</td> </tr> <tr> <td><i>L</i></td> <td>350 SD169 [-35]</td> <td></td> </tr> </tbody> </table> |             | BCVA improvement  | p       | <i>IVT</i> | -0.7 SD 10.7 log MAR plus ≥15 letters: 5% | NS between groups | <i>IVTL</i> | -1.1 SD 10.8 log MAR plus ≥15 letters: 3% |              | <i>L</i>                    | -1.6 SD 11.5 log MAR plus ≥15 letters: 5% |  |            | CMT (μm)     | p | <i>IVT</i>  | 342 SD124 [-54] | NS between groups, <0.01 vs baseline | <i>IVTL</i> | 307 SD181 [-116] | <0.01 vs baseline | <i>L</i> | 350 SD169 [-35] |  |
|                                                                                                                                  | BCVA improvement                                                                                                                                                                                                                                                                                                                                                                                                                                                                                                                                                                                                                                                                                                                                                                                                             | p                                                                                                                                                                                                                                                                                                                                                                                                                                                                                                                                                                                                                                                               |                                                                                                                                                                                                                                                                                                                                                                                                                                                                                                                                                                                                                                                                                                                                                                                                                                                                                          |             |                   |         |            |                                           |                   |             |                                           |              |                             |                                           |  |            |              |   |             |                 |                                      |             |                  |                   |          |                 |  |
| <i>IVT</i>                                                                                                                       | -0.7 SD 10.7 log MAR plus ≥15 letters: 5%                                                                                                                                                                                                                                                                                                                                                                                                                                                                                                                                                                                                                                                                                                                                                                                    | NS between groups                                                                                                                                                                                                                                                                                                                                                                                                                                                                                                                                                                                                                                               |                                                                                                                                                                                                                                                                                                                                                                                                                                                                                                                                                                                                                                                                                                                                                                                                                                                                                          |             |                   |         |            |                                           |                   |             |                                           |              |                             |                                           |  |            |              |   |             |                 |                                      |             |                  |                   |          |                 |  |
| <i>IVTL</i>                                                                                                                      | -1.1 SD 10.8 log MAR plus ≥15 letters: 3%                                                                                                                                                                                                                                                                                                                                                                                                                                                                                                                                                                                                                                                                                                                                                                                    |                                                                                                                                                                                                                                                                                                                                                                                                                                                                                                                                                                                                                                                                 |                                                                                                                                                                                                                                                                                                                                                                                                                                                                                                                                                                                                                                                                                                                                                                                                                                                                                          |             |                   |         |            |                                           |                   |             |                                           |              |                             |                                           |  |            |              |   |             |                 |                                      |             |                  |                   |          |                 |  |
| <i>L</i>                                                                                                                         | -1.6 SD 11.5 log MAR plus ≥15 letters: 5%                                                                                                                                                                                                                                                                                                                                                                                                                                                                                                                                                                                                                                                                                                                                                                                    |                                                                                                                                                                                                                                                                                                                                                                                                                                                                                                                                                                                                                                                                 |                                                                                                                                                                                                                                                                                                                                                                                                                                                                                                                                                                                                                                                                                                                                                                                                                                                                                          |             |                   |         |            |                                           |                   |             |                                           |              |                             |                                           |  |            |              |   |             |                 |                                      |             |                  |                   |          |                 |  |
|                                                                                                                                  | CMT (μm)                                                                                                                                                                                                                                                                                                                                                                                                                                                                                                                                                                                                                                                                                                                                                                                                                     | p                                                                                                                                                                                                                                                                                                                                                                                                                                                                                                                                                                                                                                                               |                                                                                                                                                                                                                                                                                                                                                                                                                                                                                                                                                                                                                                                                                                                                                                                                                                                                                          |             |                   |         |            |                                           |                   |             |                                           |              |                             |                                           |  |            |              |   |             |                 |                                      |             |                  |                   |          |                 |  |
| <i>IVT</i>                                                                                                                       | 342 SD124 [-54]                                                                                                                                                                                                                                                                                                                                                                                                                                                                                                                                                                                                                                                                                                                                                                                                              | NS between groups, <0.01 vs baseline                                                                                                                                                                                                                                                                                                                                                                                                                                                                                                                                                                                                                            |                                                                                                                                                                                                                                                                                                                                                                                                                                                                                                                                                                                                                                                                                                                                                                                                                                                                                          |             |                   |         |            |                                           |                   |             |                                           |              |                             |                                           |  |            |              |   |             |                 |                                      |             |                  |                   |          |                 |  |
| <i>IVTL</i>                                                                                                                      | 307 SD181 [-116]                                                                                                                                                                                                                                                                                                                                                                                                                                                                                                                                                                                                                                                                                                                                                                                                             | <0.01 vs baseline                                                                                                                                                                                                                                                                                                                                                                                                                                                                                                                                                                                                                                               |                                                                                                                                                                                                                                                                                                                                                                                                                                                                                                                                                                                                                                                                                                                                                                                                                                                                                          |             |                   |         |            |                                           |                   |             |                                           |              |                             |                                           |  |            |              |   |             |                 |                                      |             |                  |                   |          |                 |  |
| <i>L</i>                                                                                                                         | 350 SD169 [-35]                                                                                                                                                                                                                                                                                                                                                                                                                                                                                                                                                                                                                                                                                                                                                                                                              |                                                                                                                                                                                                                                                                                                                                                                                                                                                                                                                                                                                                                                                                 |                                                                                                                                                                                                                                                                                                                                                                                                                                                                                                                                                                                                                                                                                                                                                                                                                                                                                          |             |                   |         |            |                                           |                   |             |                                           |              |                             |                                           |  |            |              |   |             |                 |                                      |             |                  |                   |          |                 |  |

1  
2  
3  
4  
5  
6  
7  
8  
9  
10  
11  
12  
13  
14  
15  
16  
17  
18  
19  
20  
21  
22  
23  
24  
25  
26  
27  
28  
29  
30  
31  
32  
33  
34  
35  
36  
37  
38  
39  
40  
41  
42  
43  
44  
45  
46  
47  
48  
49

| <p><b>Ockrim 2008 / Sivaprasad 2008</b><br/>[42,62]<br/><b>UK</b></p> <p><b>Design:</b> 2-arm RCT<br/><b>Follow-up:</b> 1 year</p> | <p><b>N:</b> 88 eyes of 88 patients<br/><b>Inclusion criteria:</b> clinically significant DMO persisting ≥4 months, ≥1 previous laser treatment, BCVA 6/12 to 3/60, VA in fellow eye ≥3/60, duration visual loss &lt;24 months<br/><b>Exclusion criteria:</b> significant macular ischemia, baseline IO &gt;23 mmHg, glaucoma, coexistent renal disease, loss of VA due to other causes, previous vitrectomy, intraocular surgery within 3 months of study entry, previous inclusion in other DR trials, inability to return to follow-up, inability to give informed consent<br/><b>Age:</b> 62.3 to 64.8 SD7.5 to 10.1 years<br/><b>Sex:</b> 28.9 to 34.9% female<br/><b>Diabetes type:</b> 97.8 to 100% type 2 DM<br/><b>HbA1c:</b> 7 to 7.8 IQR6.5 to 8.7%<br/><b>Baseline VA:</b> ETDRS letter score 53.0 to 54.6 SD13.3 to 14.2<br/><b>Baseline CMT:</b> 410.4 to 413.4 SD127.8 to 134.1 μm<br/><b>Comorbidities:</b> 17.8 to 19.5% PDR, 13.3 to 18.6% pseudophakia, 15 to 17.8% posterior vitreous detachment</p> | <p><b>Group 1 (IVT, n=43 eyes):</b> 4 mg IV triamcinolone (mean number of IVT injections 1.8 (range 1 to 3))<br/><b>Group 2 (L, n=45 eyes):</b> ETDRS laser photocoagulation (mean number of grid laser sessions 2.1 (range 1 to 3))<br/><b>Regimen for all groups:</b> patients retreated at 4 and 8 months if they had persistent macular oedema<br/><b>Laser ETDRS protocol</b></p> | <p><b>At 12 months</b></p> <p><b>BCVA (ETDRS):</b></p> <table border="1"> <thead> <tr> <th></th> <th>BCVA (letters)</th> <th>p</th> </tr> </thead> <tbody> <tr> <td><i>IVT</i></td> <td>-0.2</td> <td>NS vs L</td> </tr> <tr> <td><i>L</i></td> <td>+1.7</td> <td></td> </tr> <tr> <td colspan="3"><b>plus ≥15 letters</b></td> </tr> <tr> <td><i>IVT</i></td> <td>4.8%</td> <td>NS vs L</td> </tr> <tr> <td><i>L</i></td> <td>12.2%</td> <td></td> </tr> </tbody> </table> <p><b>CMT (optical coherence tomography):</b></p> <table border="1"> <thead> <tr> <th></th> <th>CMT (μm)</th> <th>p</th> </tr> </thead> <tbody> <tr> <td><i>IVT</i></td> <td>-91.3</td> <td>NS vs L</td> </tr> <tr> <td><i>L</i></td> <td>-63.7</td> <td></td> </tr> </tbody> </table> |  | BCVA (letters) | p | <i>IVT</i> | -0.2 | NS vs L | <i>L</i> | +1.7 |  | <b>plus ≥15 letters</b> |  |  | <i>IVT</i> | 4.8% | NS vs L | <i>L</i> | 12.2% |  |  | CMT (μm) | p | <i>IVT</i> | -91.3 | NS vs L | <i>L</i> | -63.7 |  |
|------------------------------------------------------------------------------------------------------------------------------------|--------------------------------------------------------------------------------------------------------------------------------------------------------------------------------------------------------------------------------------------------------------------------------------------------------------------------------------------------------------------------------------------------------------------------------------------------------------------------------------------------------------------------------------------------------------------------------------------------------------------------------------------------------------------------------------------------------------------------------------------------------------------------------------------------------------------------------------------------------------------------------------------------------------------------------------------------------------------------------------------------------------------------|----------------------------------------------------------------------------------------------------------------------------------------------------------------------------------------------------------------------------------------------------------------------------------------------------------------------------------------------------------------------------------------|--------------------------------------------------------------------------------------------------------------------------------------------------------------------------------------------------------------------------------------------------------------------------------------------------------------------------------------------------------------------------------------------------------------------------------------------------------------------------------------------------------------------------------------------------------------------------------------------------------------------------------------------------------------------------------------------------------------------------------------------------------------------|--|----------------|---|------------|------|---------|----------|------|--|-------------------------|--|--|------------|------|---------|----------|-------|--|--|----------|---|------------|-------|---------|----------|-------|--|
|                                                                                                                                    | BCVA (letters)                                                                                                                                                                                                                                                                                                                                                                                                                                                                                                                                                                                                                                                                                                                                                                                                                                                                                                                                                                                                           | p                                                                                                                                                                                                                                                                                                                                                                                      |                                                                                                                                                                                                                                                                                                                                                                                                                                                                                                                                                                                                                                                                                                                                                                    |  |                |   |            |      |         |          |      |  |                         |  |  |            |      |         |          |       |  |  |          |   |            |       |         |          |       |  |
| <i>IVT</i>                                                                                                                         | -0.2                                                                                                                                                                                                                                                                                                                                                                                                                                                                                                                                                                                                                                                                                                                                                                                                                                                                                                                                                                                                                     | NS vs L                                                                                                                                                                                                                                                                                                                                                                                |                                                                                                                                                                                                                                                                                                                                                                                                                                                                                                                                                                                                                                                                                                                                                                    |  |                |   |            |      |         |          |      |  |                         |  |  |            |      |         |          |       |  |  |          |   |            |       |         |          |       |  |
| <i>L</i>                                                                                                                           | +1.7                                                                                                                                                                                                                                                                                                                                                                                                                                                                                                                                                                                                                                                                                                                                                                                                                                                                                                                                                                                                                     |                                                                                                                                                                                                                                                                                                                                                                                        |                                                                                                                                                                                                                                                                                                                                                                                                                                                                                                                                                                                                                                                                                                                                                                    |  |                |   |            |      |         |          |      |  |                         |  |  |            |      |         |          |       |  |  |          |   |            |       |         |          |       |  |
| <b>plus ≥15 letters</b>                                                                                                            |                                                                                                                                                                                                                                                                                                                                                                                                                                                                                                                                                                                                                                                                                                                                                                                                                                                                                                                                                                                                                          |                                                                                                                                                                                                                                                                                                                                                                                        |                                                                                                                                                                                                                                                                                                                                                                                                                                                                                                                                                                                                                                                                                                                                                                    |  |                |   |            |      |         |          |      |  |                         |  |  |            |      |         |          |       |  |  |          |   |            |       |         |          |       |  |
| <i>IVT</i>                                                                                                                         | 4.8%                                                                                                                                                                                                                                                                                                                                                                                                                                                                                                                                                                                                                                                                                                                                                                                                                                                                                                                                                                                                                     | NS vs L                                                                                                                                                                                                                                                                                                                                                                                |                                                                                                                                                                                                                                                                                                                                                                                                                                                                                                                                                                                                                                                                                                                                                                    |  |                |   |            |      |         |          |      |  |                         |  |  |            |      |         |          |       |  |  |          |   |            |       |         |          |       |  |
| <i>L</i>                                                                                                                           | 12.2%                                                                                                                                                                                                                                                                                                                                                                                                                                                                                                                                                                                                                                                                                                                                                                                                                                                                                                                                                                                                                    |                                                                                                                                                                                                                                                                                                                                                                                        |                                                                                                                                                                                                                                                                                                                                                                                                                                                                                                                                                                                                                                                                                                                                                                    |  |                |   |            |      |         |          |      |  |                         |  |  |            |      |         |          |       |  |  |          |   |            |       |         |          |       |  |
|                                                                                                                                    | CMT (μm)                                                                                                                                                                                                                                                                                                                                                                                                                                                                                                                                                                                                                                                                                                                                                                                                                                                                                                                                                                                                                 | p                                                                                                                                                                                                                                                                                                                                                                                      |                                                                                                                                                                                                                                                                                                                                                                                                                                                                                                                                                                                                                                                                                                                                                                    |  |                |   |            |      |         |          |      |  |                         |  |  |            |      |         |          |       |  |  |          |   |            |       |         |          |       |  |
| <i>IVT</i>                                                                                                                         | -91.3                                                                                                                                                                                                                                                                                                                                                                                                                                                                                                                                                                                                                                                                                                                                                                                                                                                                                                                                                                                                                    | NS vs L                                                                                                                                                                                                                                                                                                                                                                                |                                                                                                                                                                                                                                                                                                                                                                                                                                                                                                                                                                                                                                                                                                                                                                    |  |                |   |            |      |         |          |      |  |                         |  |  |            |      |         |          |       |  |  |          |   |            |       |         |          |       |  |
| <i>L</i>                                                                                                                           | -63.7                                                                                                                                                                                                                                                                                                                                                                                                                                                                                                                                                                                                                                                                                                                                                                                                                                                                                                                                                                                                                    |                                                                                                                                                                                                                                                                                                                                                                                        |                                                                                                                                                                                                                                                                                                                                                                                                                                                                                                                                                                                                                                                                                                                                                                    |  |                |   |            |      |         |          |      |  |                         |  |  |            |      |         |          |       |  |  |          |   |            |       |         |          |       |  |

**Abbreviations:** See table 2

Table 7: Trials assessing more than one drug

| Study                                                                                                                                                                           | Participants and baseline values                                                                                                                                                                                                                                                                                                                                                                                                                                                                                                                                                                                                                                                                                                                                                                                                                                                                                                                                                                                                              | Intervention                                                                                                                                                                                                                                                                                                                                                                     | Outcome (change from baseline at study end)                                                                                                                                                                                                                                                                                                                                                                                                                                                                                                                                                                                                                                                                                                                                                                                                                                                                                                                  |  |                       |   |            |                                                |                          |                |                                                 |               |          |                                               |  |  |                        |   |            |                       |                           |                |                       |            |          |                  |  |
|---------------------------------------------------------------------------------------------------------------------------------------------------------------------------------|-----------------------------------------------------------------------------------------------------------------------------------------------------------------------------------------------------------------------------------------------------------------------------------------------------------------------------------------------------------------------------------------------------------------------------------------------------------------------------------------------------------------------------------------------------------------------------------------------------------------------------------------------------------------------------------------------------------------------------------------------------------------------------------------------------------------------------------------------------------------------------------------------------------------------------------------------------------------------------------------------------------------------------------------------|----------------------------------------------------------------------------------------------------------------------------------------------------------------------------------------------------------------------------------------------------------------------------------------------------------------------------------------------------------------------------------|--------------------------------------------------------------------------------------------------------------------------------------------------------------------------------------------------------------------------------------------------------------------------------------------------------------------------------------------------------------------------------------------------------------------------------------------------------------------------------------------------------------------------------------------------------------------------------------------------------------------------------------------------------------------------------------------------------------------------------------------------------------------------------------------------------------------------------------------------------------------------------------------------------------------------------------------------------------|--|-----------------------|---|------------|------------------------------------------------|--------------------------|----------------|-------------------------------------------------|---------------|----------|-----------------------------------------------|--|--|------------------------|---|------------|-----------------------|---------------------------|----------------|-----------------------|------------|----------|------------------|--|
| <p><b>Ahmadih 2008</b>[31]<br/><b>Iran</b></p> <p><b>Design:</b> 3-arm placebo-controlled RCT<br/><b>Follow-up:</b> 24 weeks</p>                                                | <p><b>N:</b> 115 eyes of 101 patients<br/><b>Inclusion criteria:</b> eyes with clinically significant DMO unresponsive to previous macular laser photocoagulation (last session &gt;3 months prior)<br/><b>Exclusion criteria:</b> visual acuity <math>\geq 20/40</math>; history of cataract surgery within past 6 months; prior intraocular injection or vitrectomy, glaucoma or ocular hypertension; PDR with high-risk characteristics; vitreous hemorrhage; significant media opacity; presence of traction on the macula; pregnancy; serum creatinine <math>\geq 3</math> mg/100 ml; monocular patients<br/><b>Age:</b> 59.7 SD8.3 years (range 39 to 74)<br/><b>Sex:</b> 50.5% female<br/><b>Diabetes type:</b> not reported, 27.6% to 33.3% on insulin<br/><b>HbA1c:</b> 9.35% to 10.06%<br/><b>Baseline VA:</b> not reported<br/><b>Baseline CMT:</b> not reported<br/><b>Comorbidities:</b> (percentage of eyes) 13.9% history of cataract surgery, 81.7% NPDR, 4.3% early PDR, 13.9% regressed PDR; no iris neovascularization</p> | <p><b>Group 1 (IVB, n=41 eyes):</b> bevacizumab 1.25 mg (0.05 ml)<br/><b>Group 2 (IVB/IVT, n=37 eyes):</b> combined bevacizumab (1.25 mg (0.05 ml)) and triamcinolone (2 mg (0.05 ml)), followed by two injections of bevacizumab alone<br/><b>Group 3 (C, n=37 eyes):</b> sham injection<br/><b>Regimen for all groups:</b> 3 consecutive IV injections at 6-week intervals</p> | <p><b>At 24 weeks</b></p> <p><b>BCVA (Snellen chart):</b></p> <table border="1"> <thead> <tr> <th></th> <th>BCVA (logMAR), 95% CI</th> <th>p</th> </tr> </thead> <tbody> <tr> <td><i>IVB</i></td> <td>-0.18 (-0.29, -0.08)<br/>[+9 letters (4, 14.5)]</td> <td>0.01 vs C, NS vs IVB/IVT</td> </tr> <tr> <td><i>IVB/IVT</i></td> <td>-0.21 (-0.30, -0.12)<br/>[+10.5 letters (6, 15)]</td> <td>0.006 vs C</td> </tr> <tr> <td><i>C</i></td> <td>-0.03 (-0.08, 0.14)<br/>[+1.5 letters (-7, 4)]</td> <td></td> </tr> </tbody> </table> <p><b>CMT (OCT):</b></p> <table border="1"> <thead> <tr> <th></th> <th>CMT (<math>\mu</math>m), 95% CI</th> <th>p</th> </tr> </thead> <tbody> <tr> <td><i>IVB</i></td> <td>-95.7 (-172.2, -19.3)</td> <td>0.012 vs C, NS vs IVB/IVT</td> </tr> <tr> <td><i>IVB/IVT</i></td> <td>-92.1 (-154.4, -29.7)</td> <td>0.022 vs C</td> </tr> <tr> <td><i>C</i></td> <td>34.9 (7.9, 61.9)</td> <td></td> </tr> </tbody> </table> |  | BCVA (logMAR), 95% CI | p | <i>IVB</i> | -0.18 (-0.29, -0.08)<br>[+9 letters (4, 14.5)] | 0.01 vs C, NS vs IVB/IVT | <i>IVB/IVT</i> | -0.21 (-0.30, -0.12)<br>[+10.5 letters (6, 15)] | 0.006 vs C    | <i>C</i> | -0.03 (-0.08, 0.14)<br>[+1.5 letters (-7, 4)] |  |  | CMT ( $\mu$ m), 95% CI | p | <i>IVB</i> | -95.7 (-172.2, -19.3) | 0.012 vs C, NS vs IVB/IVT | <i>IVB/IVT</i> | -92.1 (-154.4, -29.7) | 0.022 vs C | <i>C</i> | 34.9 (7.9, 61.9) |  |
|                                                                                                                                                                                 | BCVA (logMAR), 95% CI                                                                                                                                                                                                                                                                                                                                                                                                                                                                                                                                                                                                                                                                                                                                                                                                                                                                                                                                                                                                                         | p                                                                                                                                                                                                                                                                                                                                                                                |                                                                                                                                                                                                                                                                                                                                                                                                                                                                                                                                                                                                                                                                                                                                                                                                                                                                                                                                                              |  |                       |   |            |                                                |                          |                |                                                 |               |          |                                               |  |  |                        |   |            |                       |                           |                |                       |            |          |                  |  |
| <i>IVB</i>                                                                                                                                                                      | -0.18 (-0.29, -0.08)<br>[+9 letters (4, 14.5)]                                                                                                                                                                                                                                                                                                                                                                                                                                                                                                                                                                                                                                                                                                                                                                                                                                                                                                                                                                                                | 0.01 vs C, NS vs IVB/IVT                                                                                                                                                                                                                                                                                                                                                         |                                                                                                                                                                                                                                                                                                                                                                                                                                                                                                                                                                                                                                                                                                                                                                                                                                                                                                                                                              |  |                       |   |            |                                                |                          |                |                                                 |               |          |                                               |  |  |                        |   |            |                       |                           |                |                       |            |          |                  |  |
| <i>IVB/IVT</i>                                                                                                                                                                  | -0.21 (-0.30, -0.12)<br>[+10.5 letters (6, 15)]                                                                                                                                                                                                                                                                                                                                                                                                                                                                                                                                                                                                                                                                                                                                                                                                                                                                                                                                                                                               | 0.006 vs C                                                                                                                                                                                                                                                                                                                                                                       |                                                                                                                                                                                                                                                                                                                                                                                                                                                                                                                                                                                                                                                                                                                                                                                                                                                                                                                                                              |  |                       |   |            |                                                |                          |                |                                                 |               |          |                                               |  |  |                        |   |            |                       |                           |                |                       |            |          |                  |  |
| <i>C</i>                                                                                                                                                                        | -0.03 (-0.08, 0.14)<br>[+1.5 letters (-7, 4)]                                                                                                                                                                                                                                                                                                                                                                                                                                                                                                                                                                                                                                                                                                                                                                                                                                                                                                                                                                                                 |                                                                                                                                                                                                                                                                                                                                                                                  |                                                                                                                                                                                                                                                                                                                                                                                                                                                                                                                                                                                                                                                                                                                                                                                                                                                                                                                                                              |  |                       |   |            |                                                |                          |                |                                                 |               |          |                                               |  |  |                        |   |            |                       |                           |                |                       |            |          |                  |  |
|                                                                                                                                                                                 | CMT ( $\mu$ m), 95% CI                                                                                                                                                                                                                                                                                                                                                                                                                                                                                                                                                                                                                                                                                                                                                                                                                                                                                                                                                                                                                        | p                                                                                                                                                                                                                                                                                                                                                                                |                                                                                                                                                                                                                                                                                                                                                                                                                                                                                                                                                                                                                                                                                                                                                                                                                                                                                                                                                              |  |                       |   |            |                                                |                          |                |                                                 |               |          |                                               |  |  |                        |   |            |                       |                           |                |                       |            |          |                  |  |
| <i>IVB</i>                                                                                                                                                                      | -95.7 (-172.2, -19.3)                                                                                                                                                                                                                                                                                                                                                                                                                                                                                                                                                                                                                                                                                                                                                                                                                                                                                                                                                                                                                         | 0.012 vs C, NS vs IVB/IVT                                                                                                                                                                                                                                                                                                                                                        |                                                                                                                                                                                                                                                                                                                                                                                                                                                                                                                                                                                                                                                                                                                                                                                                                                                                                                                                                              |  |                       |   |            |                                                |                          |                |                                                 |               |          |                                               |  |  |                        |   |            |                       |                           |                |                       |            |          |                  |  |
| <i>IVB/IVT</i>                                                                                                                                                                  | -92.1 (-154.4, -29.7)                                                                                                                                                                                                                                                                                                                                                                                                                                                                                                                                                                                                                                                                                                                                                                                                                                                                                                                                                                                                                         | 0.022 vs C                                                                                                                                                                                                                                                                                                                                                                       |                                                                                                                                                                                                                                                                                                                                                                                                                                                                                                                                                                                                                                                                                                                                                                                                                                                                                                                                                              |  |                       |   |            |                                                |                          |                |                                                 |               |          |                                               |  |  |                        |   |            |                       |                           |                |                       |            |          |                  |  |
| <i>C</i>                                                                                                                                                                        | 34.9 (7.9, 61.9)                                                                                                                                                                                                                                                                                                                                                                                                                                                                                                                                                                                                                                                                                                                                                                                                                                                                                                                                                                                                                              |                                                                                                                                                                                                                                                                                                                                                                                  |                                                                                                                                                                                                                                                                                                                                                                                                                                                                                                                                                                                                                                                                                                                                                                                                                                                                                                                                                              |  |                       |   |            |                                                |                          |                |                                                 |               |          |                                               |  |  |                        |   |            |                       |                           |                |                       |            |          |                  |  |
| <p><b>ATEMD 2011 (Oliveira Neto 2010 / 2011)</b> [56]<br/>Multicenter<br/><b>Design:</b> 3-arm RCT<br/><b>Follow-up:</b> 6 months</p> <p><b>Note:</b> only 48.3% completion</p> | <p><b>N:</b> 120 eyes of 120 patients<br/><b>Inclusion criteria:</b> DMO, BCVA 20/40 to 20/400, CMT <math>\geq 275</math> <math>\mu</math>m<br/><b>Exclusion criteria:</b> PDR, laser photocoagulation in previous 3 months, no IV corticosteroid or anti-VEGF in previous 3 months<br/><b>Age:</b> not reported<br/><b>Sex:</b> not reported<br/><b>Diabetes type:</b> not reported<br/><b>HbA1c:</b> not reported<br/><b>Baseline VA:</b> not reported<br/><b>Baseline CMT:</b> not reported<br/><b>Comorbidities:</b> not reported</p>                                                                                                                                                                                                                                                                                                                                                                                                                                                                                                     | <p><b>Group 1 (IVB, n=NR eyes):</b> 1.25 mg (0.05 ml) of IV bevacizumab<br/><b>Group 2 (IVT, n=NR eyes):</b> 4 mg (0.1 ml) of IV triamcinolone acetonide<br/><b>Group 3 (IVB/IVT, n=NR eyes):</b> 1.25 mg (0.05 ml) of IV bevacizumab plus 4 mg (0.1 ml) of IV triamcinolone acetonide<br/><b>Regimen for all groups:</b> monthly injections</p>                                 | <p><b>At 6 months</b></p> <p><b>BCVA:</b></p> <ul style="list-style-type: none"> <li>no significant difference between groups (between 1.7 and 2.3 lines gained in the different groups in 2010 report (n=18))</li> </ul> <p><b>CMT (OCT):</b></p> <ul style="list-style-type: none"> <li>CMT reduced in all 3 groups (between 17 and 33% reduction in the different groups in 2010 report (n=18)); no significant difference between groups</li> </ul>                                                                                                                                                                                                                                                                                                                                                                                                                                                                                                      |  |                       |   |            |                                                |                          |                |                                                 |               |          |                                               |  |  |                        |   |            |                       |                           |                |                       |            |          |                  |  |
| <p><b>DRCR Network 2010 (Elman 2010, Elman 2011)</b>[21,46]<br/><b>USA</b><br/>Multicenter</p>                                                                                  | <p><b>N:</b> 854 eyes of 691 patients<br/><b>Inclusion criteria:</b> <math>\geq 18</math> years, type 1 or 2 DM; study eye: (1) BCVA letter score 78 to 24 (20/32 to 20/320), (2) definite retinal thickening due to DMO assessed to be main cause of visual loss, (3) retinal thickness measured on time domain OCT <math>\geq 250</math> <math>\mu</math>m in central</p>                                                                                                                                                                                                                                                                                                                                                                                                                                                                                                                                                                                                                                                                   | <p><b>Group 1 (CPL, n=293 eyes):</b> sham injection plus prompt (within 3-10 days after injection) focal/grid photocoagulation<br/><b>Group 2 (RPL, n=187 eyes):</b> 0.5 mg IV ranibizumab plus prompt focal/grid</p>                                                                                                                                                            | <p><b>At 1 year</b></p> <p><b>BCVA (E-ETDRS Visual Acuity Test):</b></p> <table border="1"> <thead> <tr> <th></th> <th>BCVA (letters)</th> <th>p</th> </tr> </thead> <tbody> <tr> <td><i>CPL</i></td> <td>+3 SD13</td> <td></td> </tr> <tr> <td><i>RPL</i></td> <td>+9 SD11</td> <td>&lt;0.001 vs CPL</td> </tr> </tbody> </table>                                                                                                                                                                                                                                                                                                                                                                                                                                                                                                                                                                                                                           |  | BCVA (letters)        | p | <i>CPL</i> | +3 SD13                                        |                          | <i>RPL</i>     | +9 SD11                                         | <0.001 vs CPL |          |                                               |  |  |                        |   |            |                       |                           |                |                       |            |          |                  |  |
|                                                                                                                                                                                 | BCVA (letters)                                                                                                                                                                                                                                                                                                                                                                                                                                                                                                                                                                                                                                                                                                                                                                                                                                                                                                                                                                                                                                | p                                                                                                                                                                                                                                                                                                                                                                                |                                                                                                                                                                                                                                                                                                                                                                                                                                                                                                                                                                                                                                                                                                                                                                                                                                                                                                                                                              |  |                       |   |            |                                                |                          |                |                                                 |               |          |                                               |  |  |                        |   |            |                       |                           |                |                       |            |          |                  |  |
| <i>CPL</i>                                                                                                                                                                      | +3 SD13                                                                                                                                                                                                                                                                                                                                                                                                                                                                                                                                                                                                                                                                                                                                                                                                                                                                                                                                                                                                                                       |                                                                                                                                                                                                                                                                                                                                                                                  |                                                                                                                                                                                                                                                                                                                                                                                                                                                                                                                                                                                                                                                                                                                                                                                                                                                                                                                                                              |  |                       |   |            |                                                |                          |                |                                                 |               |          |                                               |  |  |                        |   |            |                       |                           |                |                       |            |          |                  |  |
| <i>RPL</i>                                                                                                                                                                      | +9 SD11                                                                                                                                                                                                                                                                                                                                                                                                                                                                                                                                                                                                                                                                                                                                                                                                                                                                                                                                                                                                                                       | <0.001 vs CPL                                                                                                                                                                                                                                                                                                                                                                    |                                                                                                                                                                                                                                                                                                                                                                                                                                                                                                                                                                                                                                                                                                                                                                                                                                                                                                                                                              |  |                       |   |            |                                                |                          |                |                                                 |               |          |                                               |  |  |                        |   |            |                       |                           |                |                       |            |          |                  |  |

| Study                                                                                                                                         | Participants and baseline values                                                                                                                                                                                                                                                                                                                                                                                                                                                                                                                                                                                                                                                                                                                                                                                                                                                                                                                                                                                                                                                                                                                                                                                                                                                                                                                                                                                                | Intervention                                                                                                                                                                                                                                                                                                                                                                                                                                                                                                                                                                                                                                                                                                                                                                                                                                                                                                                                                                                                                                                                                                                                                                                                                                                                                                                                                                                                                                                                                                                                                                                                                | Outcome (change from baseline at study end)                                                                                                                                                                                                                                                                                                                                                                                                                                                                                                                                                                                                                                                                                                                                                                                                                                                                                                                                                                                                                                                                                                                                                                                                                                                                                                                                                                                                                                                                                                                                                                                                                                                                                                                                                                                                                                                                                                                                                                                                                                                                                                                                                                                                                                                                                                                                                                                                                                                                                          |  |     |     |  |         |         |  |                  |  |  |           |  |                                       |  |  |            |                  |  |  |               |  |  |                  |  |            |                  |  |  |               |  |  |                 |  |            |                  |  |  |               |  |  |                 |  |            |                  |  |  |               |  |  |                  |  |  |                |   |            |            |  |            |            |                  |            |            |                  |            |            |                  |
|-----------------------------------------------------------------------------------------------------------------------------------------------|---------------------------------------------------------------------------------------------------------------------------------------------------------------------------------------------------------------------------------------------------------------------------------------------------------------------------------------------------------------------------------------------------------------------------------------------------------------------------------------------------------------------------------------------------------------------------------------------------------------------------------------------------------------------------------------------------------------------------------------------------------------------------------------------------------------------------------------------------------------------------------------------------------------------------------------------------------------------------------------------------------------------------------------------------------------------------------------------------------------------------------------------------------------------------------------------------------------------------------------------------------------------------------------------------------------------------------------------------------------------------------------------------------------------------------|-----------------------------------------------------------------------------------------------------------------------------------------------------------------------------------------------------------------------------------------------------------------------------------------------------------------------------------------------------------------------------------------------------------------------------------------------------------------------------------------------------------------------------------------------------------------------------------------------------------------------------------------------------------------------------------------------------------------------------------------------------------------------------------------------------------------------------------------------------------------------------------------------------------------------------------------------------------------------------------------------------------------------------------------------------------------------------------------------------------------------------------------------------------------------------------------------------------------------------------------------------------------------------------------------------------------------------------------------------------------------------------------------------------------------------------------------------------------------------------------------------------------------------------------------------------------------------------------------------------------------------|--------------------------------------------------------------------------------------------------------------------------------------------------------------------------------------------------------------------------------------------------------------------------------------------------------------------------------------------------------------------------------------------------------------------------------------------------------------------------------------------------------------------------------------------------------------------------------------------------------------------------------------------------------------------------------------------------------------------------------------------------------------------------------------------------------------------------------------------------------------------------------------------------------------------------------------------------------------------------------------------------------------------------------------------------------------------------------------------------------------------------------------------------------------------------------------------------------------------------------------------------------------------------------------------------------------------------------------------------------------------------------------------------------------------------------------------------------------------------------------------------------------------------------------------------------------------------------------------------------------------------------------------------------------------------------------------------------------------------------------------------------------------------------------------------------------------------------------------------------------------------------------------------------------------------------------------------------------------------------------------------------------------------------------------------------------------------------------------------------------------------------------------------------------------------------------------------------------------------------------------------------------------------------------------------------------------------------------------------------------------------------------------------------------------------------------------------------------------------------------------------------------------------------------|--|-----|-----|--|---------|---------|--|------------------|--|--|-----------|--|---------------------------------------|--|--|------------|------------------|--|--|---------------|--|--|------------------|--|------------|------------------|--|--|---------------|--|--|-----------------|--|------------|------------------|--|--|---------------|--|--|-----------------|--|------------|------------------|--|--|---------------|--|--|------------------|--|--|----------------|---|------------|------------|--|------------|------------|------------------|------------|------------|------------------|------------|------------|------------------|
| <p><b>Design:</b> 4-arm placebo-controlled RCT</p> <p><b>Follow-up:</b> 1-2 years; 2 years extension (Elman 2011) for consenting patients</p> | <p>subfield (2 study eyes per patient could be included if both were eligible at study entry)</p> <p><b>Exclusion criteria:</b> (1) treatment for DMO within the prior 3 months, (2) panretinal photocoagulation within the prior 4 months or anticipated need for panretinal photocoagulation within the next 6 months, (3) major ocular surgery within the prior 4 months, (4) history of open-angle glaucoma or steroid-induced IOP elevation, requiring IOP-lowering treatment, (5) IOP <math>\geq</math>25 mmHg; systolic pressure <math>&gt;</math>180 mmHg, diastolic pressure <math>&gt;</math>110 mmHg; myocardial infarction, other cardiac event requiring hospitalization, cerebrovascular accident, transient ischemic attack, treatment for acute congestive heart failure within 4 months before randomization</p> <p><b>Age:</b> median 62 to 64 years (25<sup>th</sup>, 75<sup>th</sup> centile 55 to 58, 69 to 70)</p> <p><b>Sex:</b> 41 to 46% female</p> <p><b>Diabetes type:</b> 6 to 9% type 1 DM, 89 to 92% type 2 DM, 2 to 3% uncertain</p> <p><b>HbA1c:</b> median 7.3 to 7.5% (25<sup>th</sup>, 75<sup>th</sup> centile 6.5 to 6.7, 8.3 to 8.6)</p> <p><b>Baseline VA:</b> letter score 63 SD12 (~20/63 SD2.4 lines)</p> <p><b>Baseline CMT:</b> 405 SD134 <math>\mu</math>m</p> <p><b>Comorbidities:</b> 60 to 67% prior treatment for DMO; 61 to 68% with NPDR, 26 to 36% with PDR or PDR scars</p> | <p>photocoagulation</p> <p><b>Group 3 (RDL, n=188 eyes):</b> 0.5 mg IV ranibizumab plus deferred (<math>\geq</math>24 weeks) focal/grid photocoagulation</p> <p><b>Group 4 (TPL, n=186 eyes):</b> 4 mg IV triamcinolone plus prompt focal/grid photocoagulation</p> <p><b>Regimen for all groups:</b> Baseline treatment 0.5 mg IV ranibizumab and 4 mg preservative free triamcinolone; study treatment every 4 weeks up to 12 weeks, then retreatment algorithm: 16 to 20 weeks, monthly retreatment unless 'success' criteria were met (visual acuity letter score <math>\geq</math>84 (20/20) or OCT central subfield thickness <math>&lt;</math>250 <math>\mu</math>m); 24 to 48 weeks, patients subdivided (according to predefined criteria) into 'success', 'improvement', 'no improvement' or 'failure'; 'improvement' group continued treatment, other groups treated at investigator discretion; alternative treatment permitted if eye met criteria for 'failure' or 'futility'. In the case of retreatment, ranibizumab could be given as often as every 4 weeks, and triamcinolone every 16 weeks (with sham injections as often as every 4 weeks). Retreatments for focal/grid laser (after <math>\geq</math>13 weeks from previous treatment) if there was oedema involving or threatening the center of the macula and if complete laser had not been given; retreatment algorithms facilitated by web-based real-time data entry system. Median number of drug injections before 1 year visit was 8-9 for ranibizumab, 3 for triamcinolone, and 5 sham injections. Retreatments between 1 and 2 years</p> | <table border="1"> <thead> <tr> <th></th> <th>RDL</th> <th>TPL</th> </tr> </thead> <tbody> <tr> <td></td> <td>+9 SD12</td> <td>+4 SD13</td> </tr> <tr> <td></td> <td colspan="2"><math>&lt;</math>0.001 vs CPL</td> </tr> <tr> <td></td> <td colspan="2">NS vs CPL</td> </tr> <tr> <td colspan="3"><b>BCVA gain categories (letters)</b></td> </tr> <tr> <td><b>CPL</b></td> <td colspan="2">+10 or more: 28%</td> </tr> <tr> <td></td> <td colspan="2">+9 to -9: 59%</td> </tr> <tr> <td></td> <td colspan="2">-10 or more: 13%</td> </tr> <tr> <td><b>RPL</b></td> <td colspan="2">+10 or more: 50%</td> </tr> <tr> <td></td> <td colspan="2">+9 to -9: 45%</td> </tr> <tr> <td></td> <td colspan="2">-10 or more: 4%</td> </tr> <tr> <td><b>RDL</b></td> <td colspan="2">+10 or more: 47%</td> </tr> <tr> <td></td> <td colspan="2">+9 to -9: 51%</td> </tr> <tr> <td></td> <td colspan="2">-10 or more: 3%</td> </tr> <tr> <td><b>TPL</b></td> <td colspan="2">+10 or more: 33%</td> </tr> <tr> <td></td> <td colspan="2">+9 to -9: 52%</td> </tr> <tr> <td></td> <td colspan="2">-10 or more: 14%</td> </tr> </tbody> </table> <p>Subgroups:</p> <ul style="list-style-type: none"> <li>BCVA results in TPL group substantially better for pseudophakic eyes than for phakic eyes (comparable to results for RPL and RDL groups) (p not reported)</li> <li>no difference in results according to prior treatment for DMO, baseline VA, baseline CMT, baseline level of retinopathy, focal or diffuse oedema</li> </ul> <p><b>CMT (OCT):</b></p> <table border="1"> <thead> <tr> <th></th> <th>CMT (<math>\mu</math>m)</th> <th>p</th> </tr> </thead> <tbody> <tr> <td><b>CPL</b></td> <td>-102 SD151</td> <td></td> </tr> <tr> <td><b>RPL</b></td> <td>-131 SD129</td> <td><math>&lt;</math>0.001 vs CPL</td> </tr> <tr> <td><b>RDL</b></td> <td>-137 SD136</td> <td><math>&lt;</math>0.001 vs CPL</td> </tr> <tr> <td><b>TPL</b></td> <td>-127 SD140</td> <td><math>&lt;</math>0.001 vs CPL</td> </tr> </tbody> </table> <p>Subgroups:</p> <ul style="list-style-type: none"> <li>pattern of CMT decrease similar for groups with CMT <math>&lt;</math>400 <math>\mu</math>m and <math>\geq</math>400 <math>\mu</math>m at baseline</li> <li>Significantly more patients with severe NPDR or worse improved by 2 levels or more in the ranibizumab groups (28%, no significant change in the other groups)</li> </ul> <p><b>At 2 years (expanded results, Elman 2011)</b></p> <p><b>BCVA (E-ETDRS Visual Acuity Test):</b></p> |  | RDL | TPL |  | +9 SD12 | +4 SD13 |  | $<$ 0.001 vs CPL |  |  | NS vs CPL |  | <b>BCVA gain categories (letters)</b> |  |  | <b>CPL</b> | +10 or more: 28% |  |  | +9 to -9: 59% |  |  | -10 or more: 13% |  | <b>RPL</b> | +10 or more: 50% |  |  | +9 to -9: 45% |  |  | -10 or more: 4% |  | <b>RDL</b> | +10 or more: 47% |  |  | +9 to -9: 51% |  |  | -10 or more: 3% |  | <b>TPL</b> | +10 or more: 33% |  |  | +9 to -9: 52% |  |  | -10 or more: 14% |  |  | CMT ( $\mu$ m) | p | <b>CPL</b> | -102 SD151 |  | <b>RPL</b> | -131 SD129 | $<$ 0.001 vs CPL | <b>RDL</b> | -137 SD136 | $<$ 0.001 vs CPL | <b>TPL</b> | -127 SD140 | $<$ 0.001 vs CPL |
|                                                                                                                                               | RDL                                                                                                                                                                                                                                                                                                                                                                                                                                                                                                                                                                                                                                                                                                                                                                                                                                                                                                                                                                                                                                                                                                                                                                                                                                                                                                                                                                                                                             | TPL                                                                                                                                                                                                                                                                                                                                                                                                                                                                                                                                                                                                                                                                                                                                                                                                                                                                                                                                                                                                                                                                                                                                                                                                                                                                                                                                                                                                                                                                                                                                                                                                                         |                                                                                                                                                                                                                                                                                                                                                                                                                                                                                                                                                                                                                                                                                                                                                                                                                                                                                                                                                                                                                                                                                                                                                                                                                                                                                                                                                                                                                                                                                                                                                                                                                                                                                                                                                                                                                                                                                                                                                                                                                                                                                                                                                                                                                                                                                                                                                                                                                                                                                                                                      |  |     |     |  |         |         |  |                  |  |  |           |  |                                       |  |  |            |                  |  |  |               |  |  |                  |  |            |                  |  |  |               |  |  |                 |  |            |                  |  |  |               |  |  |                 |  |            |                  |  |  |               |  |  |                  |  |  |                |   |            |            |  |            |            |                  |            |            |                  |            |            |                  |
|                                                                                                                                               | +9 SD12                                                                                                                                                                                                                                                                                                                                                                                                                                                                                                                                                                                                                                                                                                                                                                                                                                                                                                                                                                                                                                                                                                                                                                                                                                                                                                                                                                                                                         | +4 SD13                                                                                                                                                                                                                                                                                                                                                                                                                                                                                                                                                                                                                                                                                                                                                                                                                                                                                                                                                                                                                                                                                                                                                                                                                                                                                                                                                                                                                                                                                                                                                                                                                     |                                                                                                                                                                                                                                                                                                                                                                                                                                                                                                                                                                                                                                                                                                                                                                                                                                                                                                                                                                                                                                                                                                                                                                                                                                                                                                                                                                                                                                                                                                                                                                                                                                                                                                                                                                                                                                                                                                                                                                                                                                                                                                                                                                                                                                                                                                                                                                                                                                                                                                                                      |  |     |     |  |         |         |  |                  |  |  |           |  |                                       |  |  |            |                  |  |  |               |  |  |                  |  |            |                  |  |  |               |  |  |                 |  |            |                  |  |  |               |  |  |                 |  |            |                  |  |  |               |  |  |                  |  |  |                |   |            |            |  |            |            |                  |            |            |                  |            |            |                  |
|                                                                                                                                               | $<$ 0.001 vs CPL                                                                                                                                                                                                                                                                                                                                                                                                                                                                                                                                                                                                                                                                                                                                                                                                                                                                                                                                                                                                                                                                                                                                                                                                                                                                                                                                                                                                                |                                                                                                                                                                                                                                                                                                                                                                                                                                                                                                                                                                                                                                                                                                                                                                                                                                                                                                                                                                                                                                                                                                                                                                                                                                                                                                                                                                                                                                                                                                                                                                                                                             |                                                                                                                                                                                                                                                                                                                                                                                                                                                                                                                                                                                                                                                                                                                                                                                                                                                                                                                                                                                                                                                                                                                                                                                                                                                                                                                                                                                                                                                                                                                                                                                                                                                                                                                                                                                                                                                                                                                                                                                                                                                                                                                                                                                                                                                                                                                                                                                                                                                                                                                                      |  |     |     |  |         |         |  |                  |  |  |           |  |                                       |  |  |            |                  |  |  |               |  |  |                  |  |            |                  |  |  |               |  |  |                 |  |            |                  |  |  |               |  |  |                 |  |            |                  |  |  |               |  |  |                  |  |  |                |   |            |            |  |            |            |                  |            |            |                  |            |            |                  |
|                                                                                                                                               | NS vs CPL                                                                                                                                                                                                                                                                                                                                                                                                                                                                                                                                                                                                                                                                                                                                                                                                                                                                                                                                                                                                                                                                                                                                                                                                                                                                                                                                                                                                                       |                                                                                                                                                                                                                                                                                                                                                                                                                                                                                                                                                                                                                                                                                                                                                                                                                                                                                                                                                                                                                                                                                                                                                                                                                                                                                                                                                                                                                                                                                                                                                                                                                             |                                                                                                                                                                                                                                                                                                                                                                                                                                                                                                                                                                                                                                                                                                                                                                                                                                                                                                                                                                                                                                                                                                                                                                                                                                                                                                                                                                                                                                                                                                                                                                                                                                                                                                                                                                                                                                                                                                                                                                                                                                                                                                                                                                                                                                                                                                                                                                                                                                                                                                                                      |  |     |     |  |         |         |  |                  |  |  |           |  |                                       |  |  |            |                  |  |  |               |  |  |                  |  |            |                  |  |  |               |  |  |                 |  |            |                  |  |  |               |  |  |                 |  |            |                  |  |  |               |  |  |                  |  |  |                |   |            |            |  |            |            |                  |            |            |                  |            |            |                  |
| <b>BCVA gain categories (letters)</b>                                                                                                         |                                                                                                                                                                                                                                                                                                                                                                                                                                                                                                                                                                                                                                                                                                                                                                                                                                                                                                                                                                                                                                                                                                                                                                                                                                                                                                                                                                                                                                 |                                                                                                                                                                                                                                                                                                                                                                                                                                                                                                                                                                                                                                                                                                                                                                                                                                                                                                                                                                                                                                                                                                                                                                                                                                                                                                                                                                                                                                                                                                                                                                                                                             |                                                                                                                                                                                                                                                                                                                                                                                                                                                                                                                                                                                                                                                                                                                                                                                                                                                                                                                                                                                                                                                                                                                                                                                                                                                                                                                                                                                                                                                                                                                                                                                                                                                                                                                                                                                                                                                                                                                                                                                                                                                                                                                                                                                                                                                                                                                                                                                                                                                                                                                                      |  |     |     |  |         |         |  |                  |  |  |           |  |                                       |  |  |            |                  |  |  |               |  |  |                  |  |            |                  |  |  |               |  |  |                 |  |            |                  |  |  |               |  |  |                 |  |            |                  |  |  |               |  |  |                  |  |  |                |   |            |            |  |            |            |                  |            |            |                  |            |            |                  |
| <b>CPL</b>                                                                                                                                    | +10 or more: 28%                                                                                                                                                                                                                                                                                                                                                                                                                                                                                                                                                                                                                                                                                                                                                                                                                                                                                                                                                                                                                                                                                                                                                                                                                                                                                                                                                                                                                |                                                                                                                                                                                                                                                                                                                                                                                                                                                                                                                                                                                                                                                                                                                                                                                                                                                                                                                                                                                                                                                                                                                                                                                                                                                                                                                                                                                                                                                                                                                                                                                                                             |                                                                                                                                                                                                                                                                                                                                                                                                                                                                                                                                                                                                                                                                                                                                                                                                                                                                                                                                                                                                                                                                                                                                                                                                                                                                                                                                                                                                                                                                                                                                                                                                                                                                                                                                                                                                                                                                                                                                                                                                                                                                                                                                                                                                                                                                                                                                                                                                                                                                                                                                      |  |     |     |  |         |         |  |                  |  |  |           |  |                                       |  |  |            |                  |  |  |               |  |  |                  |  |            |                  |  |  |               |  |  |                 |  |            |                  |  |  |               |  |  |                 |  |            |                  |  |  |               |  |  |                  |  |  |                |   |            |            |  |            |            |                  |            |            |                  |            |            |                  |
|                                                                                                                                               | +9 to -9: 59%                                                                                                                                                                                                                                                                                                                                                                                                                                                                                                                                                                                                                                                                                                                                                                                                                                                                                                                                                                                                                                                                                                                                                                                                                                                                                                                                                                                                                   |                                                                                                                                                                                                                                                                                                                                                                                                                                                                                                                                                                                                                                                                                                                                                                                                                                                                                                                                                                                                                                                                                                                                                                                                                                                                                                                                                                                                                                                                                                                                                                                                                             |                                                                                                                                                                                                                                                                                                                                                                                                                                                                                                                                                                                                                                                                                                                                                                                                                                                                                                                                                                                                                                                                                                                                                                                                                                                                                                                                                                                                                                                                                                                                                                                                                                                                                                                                                                                                                                                                                                                                                                                                                                                                                                                                                                                                                                                                                                                                                                                                                                                                                                                                      |  |     |     |  |         |         |  |                  |  |  |           |  |                                       |  |  |            |                  |  |  |               |  |  |                  |  |            |                  |  |  |               |  |  |                 |  |            |                  |  |  |               |  |  |                 |  |            |                  |  |  |               |  |  |                  |  |  |                |   |            |            |  |            |            |                  |            |            |                  |            |            |                  |
|                                                                                                                                               | -10 or more: 13%                                                                                                                                                                                                                                                                                                                                                                                                                                                                                                                                                                                                                                                                                                                                                                                                                                                                                                                                                                                                                                                                                                                                                                                                                                                                                                                                                                                                                |                                                                                                                                                                                                                                                                                                                                                                                                                                                                                                                                                                                                                                                                                                                                                                                                                                                                                                                                                                                                                                                                                                                                                                                                                                                                                                                                                                                                                                                                                                                                                                                                                             |                                                                                                                                                                                                                                                                                                                                                                                                                                                                                                                                                                                                                                                                                                                                                                                                                                                                                                                                                                                                                                                                                                                                                                                                                                                                                                                                                                                                                                                                                                                                                                                                                                                                                                                                                                                                                                                                                                                                                                                                                                                                                                                                                                                                                                                                                                                                                                                                                                                                                                                                      |  |     |     |  |         |         |  |                  |  |  |           |  |                                       |  |  |            |                  |  |  |               |  |  |                  |  |            |                  |  |  |               |  |  |                 |  |            |                  |  |  |               |  |  |                 |  |            |                  |  |  |               |  |  |                  |  |  |                |   |            |            |  |            |            |                  |            |            |                  |            |            |                  |
| <b>RPL</b>                                                                                                                                    | +10 or more: 50%                                                                                                                                                                                                                                                                                                                                                                                                                                                                                                                                                                                                                                                                                                                                                                                                                                                                                                                                                                                                                                                                                                                                                                                                                                                                                                                                                                                                                |                                                                                                                                                                                                                                                                                                                                                                                                                                                                                                                                                                                                                                                                                                                                                                                                                                                                                                                                                                                                                                                                                                                                                                                                                                                                                                                                                                                                                                                                                                                                                                                                                             |                                                                                                                                                                                                                                                                                                                                                                                                                                                                                                                                                                                                                                                                                                                                                                                                                                                                                                                                                                                                                                                                                                                                                                                                                                                                                                                                                                                                                                                                                                                                                                                                                                                                                                                                                                                                                                                                                                                                                                                                                                                                                                                                                                                                                                                                                                                                                                                                                                                                                                                                      |  |     |     |  |         |         |  |                  |  |  |           |  |                                       |  |  |            |                  |  |  |               |  |  |                  |  |            |                  |  |  |               |  |  |                 |  |            |                  |  |  |               |  |  |                 |  |            |                  |  |  |               |  |  |                  |  |  |                |   |            |            |  |            |            |                  |            |            |                  |            |            |                  |
|                                                                                                                                               | +9 to -9: 45%                                                                                                                                                                                                                                                                                                                                                                                                                                                                                                                                                                                                                                                                                                                                                                                                                                                                                                                                                                                                                                                                                                                                                                                                                                                                                                                                                                                                                   |                                                                                                                                                                                                                                                                                                                                                                                                                                                                                                                                                                                                                                                                                                                                                                                                                                                                                                                                                                                                                                                                                                                                                                                                                                                                                                                                                                                                                                                                                                                                                                                                                             |                                                                                                                                                                                                                                                                                                                                                                                                                                                                                                                                                                                                                                                                                                                                                                                                                                                                                                                                                                                                                                                                                                                                                                                                                                                                                                                                                                                                                                                                                                                                                                                                                                                                                                                                                                                                                                                                                                                                                                                                                                                                                                                                                                                                                                                                                                                                                                                                                                                                                                                                      |  |     |     |  |         |         |  |                  |  |  |           |  |                                       |  |  |            |                  |  |  |               |  |  |                  |  |            |                  |  |  |               |  |  |                 |  |            |                  |  |  |               |  |  |                 |  |            |                  |  |  |               |  |  |                  |  |  |                |   |            |            |  |            |            |                  |            |            |                  |            |            |                  |
|                                                                                                                                               | -10 or more: 4%                                                                                                                                                                                                                                                                                                                                                                                                                                                                                                                                                                                                                                                                                                                                                                                                                                                                                                                                                                                                                                                                                                                                                                                                                                                                                                                                                                                                                 |                                                                                                                                                                                                                                                                                                                                                                                                                                                                                                                                                                                                                                                                                                                                                                                                                                                                                                                                                                                                                                                                                                                                                                                                                                                                                                                                                                                                                                                                                                                                                                                                                             |                                                                                                                                                                                                                                                                                                                                                                                                                                                                                                                                                                                                                                                                                                                                                                                                                                                                                                                                                                                                                                                                                                                                                                                                                                                                                                                                                                                                                                                                                                                                                                                                                                                                                                                                                                                                                                                                                                                                                                                                                                                                                                                                                                                                                                                                                                                                                                                                                                                                                                                                      |  |     |     |  |         |         |  |                  |  |  |           |  |                                       |  |  |            |                  |  |  |               |  |  |                  |  |            |                  |  |  |               |  |  |                 |  |            |                  |  |  |               |  |  |                 |  |            |                  |  |  |               |  |  |                  |  |  |                |   |            |            |  |            |            |                  |            |            |                  |            |            |                  |
| <b>RDL</b>                                                                                                                                    | +10 or more: 47%                                                                                                                                                                                                                                                                                                                                                                                                                                                                                                                                                                                                                                                                                                                                                                                                                                                                                                                                                                                                                                                                                                                                                                                                                                                                                                                                                                                                                |                                                                                                                                                                                                                                                                                                                                                                                                                                                                                                                                                                                                                                                                                                                                                                                                                                                                                                                                                                                                                                                                                                                                                                                                                                                                                                                                                                                                                                                                                                                                                                                                                             |                                                                                                                                                                                                                                                                                                                                                                                                                                                                                                                                                                                                                                                                                                                                                                                                                                                                                                                                                                                                                                                                                                                                                                                                                                                                                                                                                                                                                                                                                                                                                                                                                                                                                                                                                                                                                                                                                                                                                                                                                                                                                                                                                                                                                                                                                                                                                                                                                                                                                                                                      |  |     |     |  |         |         |  |                  |  |  |           |  |                                       |  |  |            |                  |  |  |               |  |  |                  |  |            |                  |  |  |               |  |  |                 |  |            |                  |  |  |               |  |  |                 |  |            |                  |  |  |               |  |  |                  |  |  |                |   |            |            |  |            |            |                  |            |            |                  |            |            |                  |
|                                                                                                                                               | +9 to -9: 51%                                                                                                                                                                                                                                                                                                                                                                                                                                                                                                                                                                                                                                                                                                                                                                                                                                                                                                                                                                                                                                                                                                                                                                                                                                                                                                                                                                                                                   |                                                                                                                                                                                                                                                                                                                                                                                                                                                                                                                                                                                                                                                                                                                                                                                                                                                                                                                                                                                                                                                                                                                                                                                                                                                                                                                                                                                                                                                                                                                                                                                                                             |                                                                                                                                                                                                                                                                                                                                                                                                                                                                                                                                                                                                                                                                                                                                                                                                                                                                                                                                                                                                                                                                                                                                                                                                                                                                                                                                                                                                                                                                                                                                                                                                                                                                                                                                                                                                                                                                                                                                                                                                                                                                                                                                                                                                                                                                                                                                                                                                                                                                                                                                      |  |     |     |  |         |         |  |                  |  |  |           |  |                                       |  |  |            |                  |  |  |               |  |  |                  |  |            |                  |  |  |               |  |  |                 |  |            |                  |  |  |               |  |  |                 |  |            |                  |  |  |               |  |  |                  |  |  |                |   |            |            |  |            |            |                  |            |            |                  |            |            |                  |
|                                                                                                                                               | -10 or more: 3%                                                                                                                                                                                                                                                                                                                                                                                                                                                                                                                                                                                                                                                                                                                                                                                                                                                                                                                                                                                                                                                                                                                                                                                                                                                                                                                                                                                                                 |                                                                                                                                                                                                                                                                                                                                                                                                                                                                                                                                                                                                                                                                                                                                                                                                                                                                                                                                                                                                                                                                                                                                                                                                                                                                                                                                                                                                                                                                                                                                                                                                                             |                                                                                                                                                                                                                                                                                                                                                                                                                                                                                                                                                                                                                                                                                                                                                                                                                                                                                                                                                                                                                                                                                                                                                                                                                                                                                                                                                                                                                                                                                                                                                                                                                                                                                                                                                                                                                                                                                                                                                                                                                                                                                                                                                                                                                                                                                                                                                                                                                                                                                                                                      |  |     |     |  |         |         |  |                  |  |  |           |  |                                       |  |  |            |                  |  |  |               |  |  |                  |  |            |                  |  |  |               |  |  |                 |  |            |                  |  |  |               |  |  |                 |  |            |                  |  |  |               |  |  |                  |  |  |                |   |            |            |  |            |            |                  |            |            |                  |            |            |                  |
| <b>TPL</b>                                                                                                                                    | +10 or more: 33%                                                                                                                                                                                                                                                                                                                                                                                                                                                                                                                                                                                                                                                                                                                                                                                                                                                                                                                                                                                                                                                                                                                                                                                                                                                                                                                                                                                                                |                                                                                                                                                                                                                                                                                                                                                                                                                                                                                                                                                                                                                                                                                                                                                                                                                                                                                                                                                                                                                                                                                                                                                                                                                                                                                                                                                                                                                                                                                                                                                                                                                             |                                                                                                                                                                                                                                                                                                                                                                                                                                                                                                                                                                                                                                                                                                                                                                                                                                                                                                                                                                                                                                                                                                                                                                                                                                                                                                                                                                                                                                                                                                                                                                                                                                                                                                                                                                                                                                                                                                                                                                                                                                                                                                                                                                                                                                                                                                                                                                                                                                                                                                                                      |  |     |     |  |         |         |  |                  |  |  |           |  |                                       |  |  |            |                  |  |  |               |  |  |                  |  |            |                  |  |  |               |  |  |                 |  |            |                  |  |  |               |  |  |                 |  |            |                  |  |  |               |  |  |                  |  |  |                |   |            |            |  |            |            |                  |            |            |                  |            |            |                  |
|                                                                                                                                               | +9 to -9: 52%                                                                                                                                                                                                                                                                                                                                                                                                                                                                                                                                                                                                                                                                                                                                                                                                                                                                                                                                                                                                                                                                                                                                                                                                                                                                                                                                                                                                                   |                                                                                                                                                                                                                                                                                                                                                                                                                                                                                                                                                                                                                                                                                                                                                                                                                                                                                                                                                                                                                                                                                                                                                                                                                                                                                                                                                                                                                                                                                                                                                                                                                             |                                                                                                                                                                                                                                                                                                                                                                                                                                                                                                                                                                                                                                                                                                                                                                                                                                                                                                                                                                                                                                                                                                                                                                                                                                                                                                                                                                                                                                                                                                                                                                                                                                                                                                                                                                                                                                                                                                                                                                                                                                                                                                                                                                                                                                                                                                                                                                                                                                                                                                                                      |  |     |     |  |         |         |  |                  |  |  |           |  |                                       |  |  |            |                  |  |  |               |  |  |                  |  |            |                  |  |  |               |  |  |                 |  |            |                  |  |  |               |  |  |                 |  |            |                  |  |  |               |  |  |                  |  |  |                |   |            |            |  |            |            |                  |            |            |                  |            |            |                  |
|                                                                                                                                               | -10 or more: 14%                                                                                                                                                                                                                                                                                                                                                                                                                                                                                                                                                                                                                                                                                                                                                                                                                                                                                                                                                                                                                                                                                                                                                                                                                                                                                                                                                                                                                |                                                                                                                                                                                                                                                                                                                                                                                                                                                                                                                                                                                                                                                                                                                                                                                                                                                                                                                                                                                                                                                                                                                                                                                                                                                                                                                                                                                                                                                                                                                                                                                                                             |                                                                                                                                                                                                                                                                                                                                                                                                                                                                                                                                                                                                                                                                                                                                                                                                                                                                                                                                                                                                                                                                                                                                                                                                                                                                                                                                                                                                                                                                                                                                                                                                                                                                                                                                                                                                                                                                                                                                                                                                                                                                                                                                                                                                                                                                                                                                                                                                                                                                                                                                      |  |     |     |  |         |         |  |                  |  |  |           |  |                                       |  |  |            |                  |  |  |               |  |  |                  |  |            |                  |  |  |               |  |  |                 |  |            |                  |  |  |               |  |  |                 |  |            |                  |  |  |               |  |  |                  |  |  |                |   |            |            |  |            |            |                  |            |            |                  |            |            |                  |
|                                                                                                                                               | CMT ( $\mu$ m)                                                                                                                                                                                                                                                                                                                                                                                                                                                                                                                                                                                                                                                                                                                                                                                                                                                                                                                                                                                                                                                                                                                                                                                                                                                                                                                                                                                                                  | p                                                                                                                                                                                                                                                                                                                                                                                                                                                                                                                                                                                                                                                                                                                                                                                                                                                                                                                                                                                                                                                                                                                                                                                                                                                                                                                                                                                                                                                                                                                                                                                                                           |                                                                                                                                                                                                                                                                                                                                                                                                                                                                                                                                                                                                                                                                                                                                                                                                                                                                                                                                                                                                                                                                                                                                                                                                                                                                                                                                                                                                                                                                                                                                                                                                                                                                                                                                                                                                                                                                                                                                                                                                                                                                                                                                                                                                                                                                                                                                                                                                                                                                                                                                      |  |     |     |  |         |         |  |                  |  |  |           |  |                                       |  |  |            |                  |  |  |               |  |  |                  |  |            |                  |  |  |               |  |  |                 |  |            |                  |  |  |               |  |  |                 |  |            |                  |  |  |               |  |  |                  |  |  |                |   |            |            |  |            |            |                  |            |            |                  |            |            |                  |
| <b>CPL</b>                                                                                                                                    | -102 SD151                                                                                                                                                                                                                                                                                                                                                                                                                                                                                                                                                                                                                                                                                                                                                                                                                                                                                                                                                                                                                                                                                                                                                                                                                                                                                                                                                                                                                      |                                                                                                                                                                                                                                                                                                                                                                                                                                                                                                                                                                                                                                                                                                                                                                                                                                                                                                                                                                                                                                                                                                                                                                                                                                                                                                                                                                                                                                                                                                                                                                                                                             |                                                                                                                                                                                                                                                                                                                                                                                                                                                                                                                                                                                                                                                                                                                                                                                                                                                                                                                                                                                                                                                                                                                                                                                                                                                                                                                                                                                                                                                                                                                                                                                                                                                                                                                                                                                                                                                                                                                                                                                                                                                                                                                                                                                                                                                                                                                                                                                                                                                                                                                                      |  |     |     |  |         |         |  |                  |  |  |           |  |                                       |  |  |            |                  |  |  |               |  |  |                  |  |            |                  |  |  |               |  |  |                 |  |            |                  |  |  |               |  |  |                 |  |            |                  |  |  |               |  |  |                  |  |  |                |   |            |            |  |            |            |                  |            |            |                  |            |            |                  |
| <b>RPL</b>                                                                                                                                    | -131 SD129                                                                                                                                                                                                                                                                                                                                                                                                                                                                                                                                                                                                                                                                                                                                                                                                                                                                                                                                                                                                                                                                                                                                                                                                                                                                                                                                                                                                                      | $<$ 0.001 vs CPL                                                                                                                                                                                                                                                                                                                                                                                                                                                                                                                                                                                                                                                                                                                                                                                                                                                                                                                                                                                                                                                                                                                                                                                                                                                                                                                                                                                                                                                                                                                                                                                                            |                                                                                                                                                                                                                                                                                                                                                                                                                                                                                                                                                                                                                                                                                                                                                                                                                                                                                                                                                                                                                                                                                                                                                                                                                                                                                                                                                                                                                                                                                                                                                                                                                                                                                                                                                                                                                                                                                                                                                                                                                                                                                                                                                                                                                                                                                                                                                                                                                                                                                                                                      |  |     |     |  |         |         |  |                  |  |  |           |  |                                       |  |  |            |                  |  |  |               |  |  |                  |  |            |                  |  |  |               |  |  |                 |  |            |                  |  |  |               |  |  |                 |  |            |                  |  |  |               |  |  |                  |  |  |                |   |            |            |  |            |            |                  |            |            |                  |            |            |                  |
| <b>RDL</b>                                                                                                                                    | -137 SD136                                                                                                                                                                                                                                                                                                                                                                                                                                                                                                                                                                                                                                                                                                                                                                                                                                                                                                                                                                                                                                                                                                                                                                                                                                                                                                                                                                                                                      | $<$ 0.001 vs CPL                                                                                                                                                                                                                                                                                                                                                                                                                                                                                                                                                                                                                                                                                                                                                                                                                                                                                                                                                                                                                                                                                                                                                                                                                                                                                                                                                                                                                                                                                                                                                                                                            |                                                                                                                                                                                                                                                                                                                                                                                                                                                                                                                                                                                                                                                                                                                                                                                                                                                                                                                                                                                                                                                                                                                                                                                                                                                                                                                                                                                                                                                                                                                                                                                                                                                                                                                                                                                                                                                                                                                                                                                                                                                                                                                                                                                                                                                                                                                                                                                                                                                                                                                                      |  |     |     |  |         |         |  |                  |  |  |           |  |                                       |  |  |            |                  |  |  |               |  |  |                  |  |            |                  |  |  |               |  |  |                 |  |            |                  |  |  |               |  |  |                 |  |            |                  |  |  |               |  |  |                  |  |  |                |   |            |            |  |            |            |                  |            |            |                  |            |            |                  |
| <b>TPL</b>                                                                                                                                    | -127 SD140                                                                                                                                                                                                                                                                                                                                                                                                                                                                                                                                                                                                                                                                                                                                                                                                                                                                                                                                                                                                                                                                                                                                                                                                                                                                                                                                                                                                                      | $<$ 0.001 vs CPL                                                                                                                                                                                                                                                                                                                                                                                                                                                                                                                                                                                                                                                                                                                                                                                                                                                                                                                                                                                                                                                                                                                                                                                                                                                                                                                                                                                                                                                                                                                                                                                                            |                                                                                                                                                                                                                                                                                                                                                                                                                                                                                                                                                                                                                                                                                                                                                                                                                                                                                                                                                                                                                                                                                                                                                                                                                                                                                                                                                                                                                                                                                                                                                                                                                                                                                                                                                                                                                                                                                                                                                                                                                                                                                                                                                                                                                                                                                                                                                                                                                                                                                                                                      |  |     |     |  |         |         |  |                  |  |  |           |  |                                       |  |  |            |                  |  |  |               |  |  |                  |  |            |                  |  |  |               |  |  |                 |  |            |                  |  |  |               |  |  |                 |  |            |                  |  |  |               |  |  |                  |  |  |                |   |            |            |  |            |            |                  |            |            |                  |            |            |                  |

1  
2  
3  
4  
5  
6  
7  
8  
9  
10  
11  
12  
13  
14  
15  
16  
17  
18  
19  
20  
21  
22  
23  
24  
25  
26  
27  
28  
29  
30  
31  
32  
33  
34  
35  
36  
37  
38  
39  
40  
41  
42  
43  
44  
45  
46  
47  
48  
49

| Study                                                                                                                                                                                       | Participants and baseline values                                                                                                                                                                                                                                                                                                               | Intervention                                                                                                                                                                                                                                                                                  | Outcome (change from baseline at study end)                                                                                                                                                                                                                                                                                                                                                                                                                                                                                                                                                                                                                                                                                                                                                                                                                                                                                                                                                                                                                                                                                                                                                                                                                                                                                                                                                                                                                                                                                                                                                                                                                                                    |      |  |   |                                            |  |  |                    |         |                                      |                    |         |                                                         |                    |         |                                      |                    |         |           |                                |  |  |            |                  |  |  |               |  |  |                  |  |            |                  |           |  |               |  |  |                 |  |            |                  |             |  |               |  |  |                 |  |            |                  |           |  |               |  |  |                  |  |            |  |  |          |  |   |            |            |  |            |            |              |            |            |             |            |            |           |
|---------------------------------------------------------------------------------------------------------------------------------------------------------------------------------------------|------------------------------------------------------------------------------------------------------------------------------------------------------------------------------------------------------------------------------------------------------------------------------------------------------------------------------------------------|-----------------------------------------------------------------------------------------------------------------------------------------------------------------------------------------------------------------------------------------------------------------------------------------------|------------------------------------------------------------------------------------------------------------------------------------------------------------------------------------------------------------------------------------------------------------------------------------------------------------------------------------------------------------------------------------------------------------------------------------------------------------------------------------------------------------------------------------------------------------------------------------------------------------------------------------------------------------------------------------------------------------------------------------------------------------------------------------------------------------------------------------------------------------------------------------------------------------------------------------------------------------------------------------------------------------------------------------------------------------------------------------------------------------------------------------------------------------------------------------------------------------------------------------------------------------------------------------------------------------------------------------------------------------------------------------------------------------------------------------------------------------------------------------------------------------------------------------------------------------------------------------------------------------------------------------------------------------------------------------------------|------|--|---|--------------------------------------------|--|--|--------------------|---------|--------------------------------------|--------------------|---------|---------------------------------------------------------|--------------------|---------|--------------------------------------|--------------------|---------|-----------|--------------------------------|--|--|------------|------------------|--|--|---------------|--|--|------------------|--|------------|------------------|-----------|--|---------------|--|--|-----------------|--|------------|------------------|-------------|--|---------------|--|--|-----------------|--|------------|------------------|-----------|--|---------------|--|--|------------------|--|------------|--|--|----------|--|---|------------|------------|--|------------|------------|--------------|------------|------------|-------------|------------|------------|-----------|
|                                                                                                                                                                                             |                                                                                                                                                                                                                                                                                                                                                | (Elman 2011): median injections 2 in RPL group, 3 in RDL group; in TPL group 68% of eyes received at least 1 injection; at least one focal/grid laser sessions between 1 and 2 years: 51% CPL, 40% RPL, 29% RDL, 52% TPL<br>Laser Modified ETDRS protocol as used in prior DRCR.net protocols | <table border="1"> <thead> <tr> <th colspan="2">BCVA</th> <th>p</th> </tr> <tr> <th colspan="3">(letters)</th> </tr> </thead> <tbody> <tr> <td><i>CPL (n=211)</i></td> <td>+3 SD15</td> <td></td> </tr> <tr> <td><i>RPL (n=136)</i></td> <td>+7 SD13</td> <td>0.03 vs CPL</td> </tr> <tr> <td><i>RDL (n=139)</i></td> <td>+9 SD14</td> <td>&lt;0.001 vs CPL</td> </tr> <tr> <td><i>TPL (n=142)</i></td> <td>+2 SD19</td> <td>NS vs CPL</td> </tr> <tr> <th colspan="3">BCVA gain categories (letters)</th> </tr> <tr> <td><i>CPL</i></td> <td colspan="2">+10 or more: 36%</td> </tr> <tr> <td></td> <td colspan="2">+9 to -9: 52%</td> </tr> <tr> <td></td> <td colspan="2">-10 or more: 13%</td> </tr> <tr> <td><i>RPL</i></td> <td>+10 or more: 44%</td> <td>NS vs CPL</td> </tr> <tr> <td></td> <td>+9 to -9: 49%</td> <td></td> </tr> <tr> <td></td> <td>-10 or more: 7%</td> <td></td> </tr> <tr> <td><i>RDL</i></td> <td>+10 or more: 49%</td> <td>0.01 vs CPL</td> </tr> <tr> <td></td> <td>+9 to -9: 48%</td> <td></td> </tr> <tr> <td></td> <td>-10 or more: 3%</td> <td></td> </tr> <tr> <td><i>TPL</i></td> <td>+10 or more: 41%</td> <td>NS vs CPL</td> </tr> <tr> <td></td> <td>+9 to -9: 40%</td> <td></td> </tr> <tr> <td></td> <td>-10 or more: 19%</td> <td></td> </tr> <tr> <th colspan="3">CMT (OCT):</th> </tr> <tr> <th colspan="2">CMT (µm)</th> <th>p</th> </tr> <tr> <td><i>CPL</i></td> <td>-138 SD149</td> <td></td> </tr> <tr> <td><i>RPL</i></td> <td>-141 SD155</td> <td>0.003 vs CPL</td> </tr> <tr> <td><i>RDL</i></td> <td>-150 SD143</td> <td>0.01 vs CPL</td> </tr> <tr> <td><i>TPL</i></td> <td>-107 SD145</td> <td>NS vs CPL</td> </tr> </tbody> </table> | BCVA |  | p | (letters)                                  |  |  | <i>CPL (n=211)</i> | +3 SD15 |                                      | <i>RPL (n=136)</i> | +7 SD13 | 0.03 vs CPL                                             | <i>RDL (n=139)</i> | +9 SD14 | <0.001 vs CPL                        | <i>TPL (n=142)</i> | +2 SD19 | NS vs CPL | BCVA gain categories (letters) |  |  | <i>CPL</i> | +10 or more: 36% |  |  | +9 to -9: 52% |  |  | -10 or more: 13% |  | <i>RPL</i> | +10 or more: 44% | NS vs CPL |  | +9 to -9: 49% |  |  | -10 or more: 7% |  | <i>RDL</i> | +10 or more: 49% | 0.01 vs CPL |  | +9 to -9: 48% |  |  | -10 or more: 3% |  | <i>TPL</i> | +10 or more: 41% | NS vs CPL |  | +9 to -9: 40% |  |  | -10 or more: 19% |  | CMT (OCT): |  |  | CMT (µm) |  | p | <i>CPL</i> | -138 SD149 |  | <i>RPL</i> | -141 SD155 | 0.003 vs CPL | <i>RDL</i> | -150 SD143 | 0.01 vs CPL | <i>TPL</i> | -107 SD145 | NS vs CPL |
| BCVA                                                                                                                                                                                        |                                                                                                                                                                                                                                                                                                                                                | p                                                                                                                                                                                                                                                                                             |                                                                                                                                                                                                                                                                                                                                                                                                                                                                                                                                                                                                                                                                                                                                                                                                                                                                                                                                                                                                                                                                                                                                                                                                                                                                                                                                                                                                                                                                                                                                                                                                                                                                                                |      |  |   |                                            |  |  |                    |         |                                      |                    |         |                                                         |                    |         |                                      |                    |         |           |                                |  |  |            |                  |  |  |               |  |  |                  |  |            |                  |           |  |               |  |  |                 |  |            |                  |             |  |               |  |  |                 |  |            |                  |           |  |               |  |  |                  |  |            |  |  |          |  |   |            |            |  |            |            |              |            |            |             |            |            |           |
| (letters)                                                                                                                                                                                   |                                                                                                                                                                                                                                                                                                                                                |                                                                                                                                                                                                                                                                                               |                                                                                                                                                                                                                                                                                                                                                                                                                                                                                                                                                                                                                                                                                                                                                                                                                                                                                                                                                                                                                                                                                                                                                                                                                                                                                                                                                                                                                                                                                                                                                                                                                                                                                                |      |  |   |                                            |  |  |                    |         |                                      |                    |         |                                                         |                    |         |                                      |                    |         |           |                                |  |  |            |                  |  |  |               |  |  |                  |  |            |                  |           |  |               |  |  |                 |  |            |                  |             |  |               |  |  |                 |  |            |                  |           |  |               |  |  |                  |  |            |  |  |          |  |   |            |            |  |            |            |              |            |            |             |            |            |           |
| <i>CPL (n=211)</i>                                                                                                                                                                          | +3 SD15                                                                                                                                                                                                                                                                                                                                        |                                                                                                                                                                                                                                                                                               |                                                                                                                                                                                                                                                                                                                                                                                                                                                                                                                                                                                                                                                                                                                                                                                                                                                                                                                                                                                                                                                                                                                                                                                                                                                                                                                                                                                                                                                                                                                                                                                                                                                                                                |      |  |   |                                            |  |  |                    |         |                                      |                    |         |                                                         |                    |         |                                      |                    |         |           |                                |  |  |            |                  |  |  |               |  |  |                  |  |            |                  |           |  |               |  |  |                 |  |            |                  |             |  |               |  |  |                 |  |            |                  |           |  |               |  |  |                  |  |            |  |  |          |  |   |            |            |  |            |            |              |            |            |             |            |            |           |
| <i>RPL (n=136)</i>                                                                                                                                                                          | +7 SD13                                                                                                                                                                                                                                                                                                                                        | 0.03 vs CPL                                                                                                                                                                                                                                                                                   |                                                                                                                                                                                                                                                                                                                                                                                                                                                                                                                                                                                                                                                                                                                                                                                                                                                                                                                                                                                                                                                                                                                                                                                                                                                                                                                                                                                                                                                                                                                                                                                                                                                                                                |      |  |   |                                            |  |  |                    |         |                                      |                    |         |                                                         |                    |         |                                      |                    |         |           |                                |  |  |            |                  |  |  |               |  |  |                  |  |            |                  |           |  |               |  |  |                 |  |            |                  |             |  |               |  |  |                 |  |            |                  |           |  |               |  |  |                  |  |            |  |  |          |  |   |            |            |  |            |            |              |            |            |             |            |            |           |
| <i>RDL (n=139)</i>                                                                                                                                                                          | +9 SD14                                                                                                                                                                                                                                                                                                                                        | <0.001 vs CPL                                                                                                                                                                                                                                                                                 |                                                                                                                                                                                                                                                                                                                                                                                                                                                                                                                                                                                                                                                                                                                                                                                                                                                                                                                                                                                                                                                                                                                                                                                                                                                                                                                                                                                                                                                                                                                                                                                                                                                                                                |      |  |   |                                            |  |  |                    |         |                                      |                    |         |                                                         |                    |         |                                      |                    |         |           |                                |  |  |            |                  |  |  |               |  |  |                  |  |            |                  |           |  |               |  |  |                 |  |            |                  |             |  |               |  |  |                 |  |            |                  |           |  |               |  |  |                  |  |            |  |  |          |  |   |            |            |  |            |            |              |            |            |             |            |            |           |
| <i>TPL (n=142)</i>                                                                                                                                                                          | +2 SD19                                                                                                                                                                                                                                                                                                                                        | NS vs CPL                                                                                                                                                                                                                                                                                     |                                                                                                                                                                                                                                                                                                                                                                                                                                                                                                                                                                                                                                                                                                                                                                                                                                                                                                                                                                                                                                                                                                                                                                                                                                                                                                                                                                                                                                                                                                                                                                                                                                                                                                |      |  |   |                                            |  |  |                    |         |                                      |                    |         |                                                         |                    |         |                                      |                    |         |           |                                |  |  |            |                  |  |  |               |  |  |                  |  |            |                  |           |  |               |  |  |                 |  |            |                  |             |  |               |  |  |                 |  |            |                  |           |  |               |  |  |                  |  |            |  |  |          |  |   |            |            |  |            |            |              |            |            |             |            |            |           |
| BCVA gain categories (letters)                                                                                                                                                              |                                                                                                                                                                                                                                                                                                                                                |                                                                                                                                                                                                                                                                                               |                                                                                                                                                                                                                                                                                                                                                                                                                                                                                                                                                                                                                                                                                                                                                                                                                                                                                                                                                                                                                                                                                                                                                                                                                                                                                                                                                                                                                                                                                                                                                                                                                                                                                                |      |  |   |                                            |  |  |                    |         |                                      |                    |         |                                                         |                    |         |                                      |                    |         |           |                                |  |  |            |                  |  |  |               |  |  |                  |  |            |                  |           |  |               |  |  |                 |  |            |                  |             |  |               |  |  |                 |  |            |                  |           |  |               |  |  |                  |  |            |  |  |          |  |   |            |            |  |            |            |              |            |            |             |            |            |           |
| <i>CPL</i>                                                                                                                                                                                  | +10 or more: 36%                                                                                                                                                                                                                                                                                                                               |                                                                                                                                                                                                                                                                                               |                                                                                                                                                                                                                                                                                                                                                                                                                                                                                                                                                                                                                                                                                                                                                                                                                                                                                                                                                                                                                                                                                                                                                                                                                                                                                                                                                                                                                                                                                                                                                                                                                                                                                                |      |  |   |                                            |  |  |                    |         |                                      |                    |         |                                                         |                    |         |                                      |                    |         |           |                                |  |  |            |                  |  |  |               |  |  |                  |  |            |                  |           |  |               |  |  |                 |  |            |                  |             |  |               |  |  |                 |  |            |                  |           |  |               |  |  |                  |  |            |  |  |          |  |   |            |            |  |            |            |              |            |            |             |            |            |           |
|                                                                                                                                                                                             | +9 to -9: 52%                                                                                                                                                                                                                                                                                                                                  |                                                                                                                                                                                                                                                                                               |                                                                                                                                                                                                                                                                                                                                                                                                                                                                                                                                                                                                                                                                                                                                                                                                                                                                                                                                                                                                                                                                                                                                                                                                                                                                                                                                                                                                                                                                                                                                                                                                                                                                                                |      |  |   |                                            |  |  |                    |         |                                      |                    |         |                                                         |                    |         |                                      |                    |         |           |                                |  |  |            |                  |  |  |               |  |  |                  |  |            |                  |           |  |               |  |  |                 |  |            |                  |             |  |               |  |  |                 |  |            |                  |           |  |               |  |  |                  |  |            |  |  |          |  |   |            |            |  |            |            |              |            |            |             |            |            |           |
|                                                                                                                                                                                             | -10 or more: 13%                                                                                                                                                                                                                                                                                                                               |                                                                                                                                                                                                                                                                                               |                                                                                                                                                                                                                                                                                                                                                                                                                                                                                                                                                                                                                                                                                                                                                                                                                                                                                                                                                                                                                                                                                                                                                                                                                                                                                                                                                                                                                                                                                                                                                                                                                                                                                                |      |  |   |                                            |  |  |                    |         |                                      |                    |         |                                                         |                    |         |                                      |                    |         |           |                                |  |  |            |                  |  |  |               |  |  |                  |  |            |                  |           |  |               |  |  |                 |  |            |                  |             |  |               |  |  |                 |  |            |                  |           |  |               |  |  |                  |  |            |  |  |          |  |   |            |            |  |            |            |              |            |            |             |            |            |           |
| <i>RPL</i>                                                                                                                                                                                  | +10 or more: 44%                                                                                                                                                                                                                                                                                                                               | NS vs CPL                                                                                                                                                                                                                                                                                     |                                                                                                                                                                                                                                                                                                                                                                                                                                                                                                                                                                                                                                                                                                                                                                                                                                                                                                                                                                                                                                                                                                                                                                                                                                                                                                                                                                                                                                                                                                                                                                                                                                                                                                |      |  |   |                                            |  |  |                    |         |                                      |                    |         |                                                         |                    |         |                                      |                    |         |           |                                |  |  |            |                  |  |  |               |  |  |                  |  |            |                  |           |  |               |  |  |                 |  |            |                  |             |  |               |  |  |                 |  |            |                  |           |  |               |  |  |                  |  |            |  |  |          |  |   |            |            |  |            |            |              |            |            |             |            |            |           |
|                                                                                                                                                                                             | +9 to -9: 49%                                                                                                                                                                                                                                                                                                                                  |                                                                                                                                                                                                                                                                                               |                                                                                                                                                                                                                                                                                                                                                                                                                                                                                                                                                                                                                                                                                                                                                                                                                                                                                                                                                                                                                                                                                                                                                                                                                                                                                                                                                                                                                                                                                                                                                                                                                                                                                                |      |  |   |                                            |  |  |                    |         |                                      |                    |         |                                                         |                    |         |                                      |                    |         |           |                                |  |  |            |                  |  |  |               |  |  |                  |  |            |                  |           |  |               |  |  |                 |  |            |                  |             |  |               |  |  |                 |  |            |                  |           |  |               |  |  |                  |  |            |  |  |          |  |   |            |            |  |            |            |              |            |            |             |            |            |           |
|                                                                                                                                                                                             | -10 or more: 7%                                                                                                                                                                                                                                                                                                                                |                                                                                                                                                                                                                                                                                               |                                                                                                                                                                                                                                                                                                                                                                                                                                                                                                                                                                                                                                                                                                                                                                                                                                                                                                                                                                                                                                                                                                                                                                                                                                                                                                                                                                                                                                                                                                                                                                                                                                                                                                |      |  |   |                                            |  |  |                    |         |                                      |                    |         |                                                         |                    |         |                                      |                    |         |           |                                |  |  |            |                  |  |  |               |  |  |                  |  |            |                  |           |  |               |  |  |                 |  |            |                  |             |  |               |  |  |                 |  |            |                  |           |  |               |  |  |                  |  |            |  |  |          |  |   |            |            |  |            |            |              |            |            |             |            |            |           |
| <i>RDL</i>                                                                                                                                                                                  | +10 or more: 49%                                                                                                                                                                                                                                                                                                                               | 0.01 vs CPL                                                                                                                                                                                                                                                                                   |                                                                                                                                                                                                                                                                                                                                                                                                                                                                                                                                                                                                                                                                                                                                                                                                                                                                                                                                                                                                                                                                                                                                                                                                                                                                                                                                                                                                                                                                                                                                                                                                                                                                                                |      |  |   |                                            |  |  |                    |         |                                      |                    |         |                                                         |                    |         |                                      |                    |         |           |                                |  |  |            |                  |  |  |               |  |  |                  |  |            |                  |           |  |               |  |  |                 |  |            |                  |             |  |               |  |  |                 |  |            |                  |           |  |               |  |  |                  |  |            |  |  |          |  |   |            |            |  |            |            |              |            |            |             |            |            |           |
|                                                                                                                                                                                             | +9 to -9: 48%                                                                                                                                                                                                                                                                                                                                  |                                                                                                                                                                                                                                                                                               |                                                                                                                                                                                                                                                                                                                                                                                                                                                                                                                                                                                                                                                                                                                                                                                                                                                                                                                                                                                                                                                                                                                                                                                                                                                                                                                                                                                                                                                                                                                                                                                                                                                                                                |      |  |   |                                            |  |  |                    |         |                                      |                    |         |                                                         |                    |         |                                      |                    |         |           |                                |  |  |            |                  |  |  |               |  |  |                  |  |            |                  |           |  |               |  |  |                 |  |            |                  |             |  |               |  |  |                 |  |            |                  |           |  |               |  |  |                  |  |            |  |  |          |  |   |            |            |  |            |            |              |            |            |             |            |            |           |
|                                                                                                                                                                                             | -10 or more: 3%                                                                                                                                                                                                                                                                                                                                |                                                                                                                                                                                                                                                                                               |                                                                                                                                                                                                                                                                                                                                                                                                                                                                                                                                                                                                                                                                                                                                                                                                                                                                                                                                                                                                                                                                                                                                                                                                                                                                                                                                                                                                                                                                                                                                                                                                                                                                                                |      |  |   |                                            |  |  |                    |         |                                      |                    |         |                                                         |                    |         |                                      |                    |         |           |                                |  |  |            |                  |  |  |               |  |  |                  |  |            |                  |           |  |               |  |  |                 |  |            |                  |             |  |               |  |  |                 |  |            |                  |           |  |               |  |  |                  |  |            |  |  |          |  |   |            |            |  |            |            |              |            |            |             |            |            |           |
| <i>TPL</i>                                                                                                                                                                                  | +10 or more: 41%                                                                                                                                                                                                                                                                                                                               | NS vs CPL                                                                                                                                                                                                                                                                                     |                                                                                                                                                                                                                                                                                                                                                                                                                                                                                                                                                                                                                                                                                                                                                                                                                                                                                                                                                                                                                                                                                                                                                                                                                                                                                                                                                                                                                                                                                                                                                                                                                                                                                                |      |  |   |                                            |  |  |                    |         |                                      |                    |         |                                                         |                    |         |                                      |                    |         |           |                                |  |  |            |                  |  |  |               |  |  |                  |  |            |                  |           |  |               |  |  |                 |  |            |                  |             |  |               |  |  |                 |  |            |                  |           |  |               |  |  |                  |  |            |  |  |          |  |   |            |            |  |            |            |              |            |            |             |            |            |           |
|                                                                                                                                                                                             | +9 to -9: 40%                                                                                                                                                                                                                                                                                                                                  |                                                                                                                                                                                                                                                                                               |                                                                                                                                                                                                                                                                                                                                                                                                                                                                                                                                                                                                                                                                                                                                                                                                                                                                                                                                                                                                                                                                                                                                                                                                                                                                                                                                                                                                                                                                                                                                                                                                                                                                                                |      |  |   |                                            |  |  |                    |         |                                      |                    |         |                                                         |                    |         |                                      |                    |         |           |                                |  |  |            |                  |  |  |               |  |  |                  |  |            |                  |           |  |               |  |  |                 |  |            |                  |             |  |               |  |  |                 |  |            |                  |           |  |               |  |  |                  |  |            |  |  |          |  |   |            |            |  |            |            |              |            |            |             |            |            |           |
|                                                                                                                                                                                             | -10 or more: 19%                                                                                                                                                                                                                                                                                                                               |                                                                                                                                                                                                                                                                                               |                                                                                                                                                                                                                                                                                                                                                                                                                                                                                                                                                                                                                                                                                                                                                                                                                                                                                                                                                                                                                                                                                                                                                                                                                                                                                                                                                                                                                                                                                                                                                                                                                                                                                                |      |  |   |                                            |  |  |                    |         |                                      |                    |         |                                                         |                    |         |                                      |                    |         |           |                                |  |  |            |                  |  |  |               |  |  |                  |  |            |                  |           |  |               |  |  |                 |  |            |                  |             |  |               |  |  |                 |  |            |                  |           |  |               |  |  |                  |  |            |  |  |          |  |   |            |            |  |            |            |              |            |            |             |            |            |           |
| CMT (OCT):                                                                                                                                                                                  |                                                                                                                                                                                                                                                                                                                                                |                                                                                                                                                                                                                                                                                               |                                                                                                                                                                                                                                                                                                                                                                                                                                                                                                                                                                                                                                                                                                                                                                                                                                                                                                                                                                                                                                                                                                                                                                                                                                                                                                                                                                                                                                                                                                                                                                                                                                                                                                |      |  |   |                                            |  |  |                    |         |                                      |                    |         |                                                         |                    |         |                                      |                    |         |           |                                |  |  |            |                  |  |  |               |  |  |                  |  |            |                  |           |  |               |  |  |                 |  |            |                  |             |  |               |  |  |                 |  |            |                  |           |  |               |  |  |                  |  |            |  |  |          |  |   |            |            |  |            |            |              |            |            |             |            |            |           |
| CMT (µm)                                                                                                                                                                                    |                                                                                                                                                                                                                                                                                                                                                | p                                                                                                                                                                                                                                                                                             |                                                                                                                                                                                                                                                                                                                                                                                                                                                                                                                                                                                                                                                                                                                                                                                                                                                                                                                                                                                                                                                                                                                                                                                                                                                                                                                                                                                                                                                                                                                                                                                                                                                                                                |      |  |   |                                            |  |  |                    |         |                                      |                    |         |                                                         |                    |         |                                      |                    |         |           |                                |  |  |            |                  |  |  |               |  |  |                  |  |            |                  |           |  |               |  |  |                 |  |            |                  |             |  |               |  |  |                 |  |            |                  |           |  |               |  |  |                  |  |            |  |  |          |  |   |            |            |  |            |            |              |            |            |             |            |            |           |
| <i>CPL</i>                                                                                                                                                                                  | -138 SD149                                                                                                                                                                                                                                                                                                                                     |                                                                                                                                                                                                                                                                                               |                                                                                                                                                                                                                                                                                                                                                                                                                                                                                                                                                                                                                                                                                                                                                                                                                                                                                                                                                                                                                                                                                                                                                                                                                                                                                                                                                                                                                                                                                                                                                                                                                                                                                                |      |  |   |                                            |  |  |                    |         |                                      |                    |         |                                                         |                    |         |                                      |                    |         |           |                                |  |  |            |                  |  |  |               |  |  |                  |  |            |                  |           |  |               |  |  |                 |  |            |                  |             |  |               |  |  |                 |  |            |                  |           |  |               |  |  |                  |  |            |  |  |          |  |   |            |            |  |            |            |              |            |            |             |            |            |           |
| <i>RPL</i>                                                                                                                                                                                  | -141 SD155                                                                                                                                                                                                                                                                                                                                     | 0.003 vs CPL                                                                                                                                                                                                                                                                                  |                                                                                                                                                                                                                                                                                                                                                                                                                                                                                                                                                                                                                                                                                                                                                                                                                                                                                                                                                                                                                                                                                                                                                                                                                                                                                                                                                                                                                                                                                                                                                                                                                                                                                                |      |  |   |                                            |  |  |                    |         |                                      |                    |         |                                                         |                    |         |                                      |                    |         |           |                                |  |  |            |                  |  |  |               |  |  |                  |  |            |                  |           |  |               |  |  |                 |  |            |                  |             |  |               |  |  |                 |  |            |                  |           |  |               |  |  |                  |  |            |  |  |          |  |   |            |            |  |            |            |              |            |            |             |            |            |           |
| <i>RDL</i>                                                                                                                                                                                  | -150 SD143                                                                                                                                                                                                                                                                                                                                     | 0.01 vs CPL                                                                                                                                                                                                                                                                                   |                                                                                                                                                                                                                                                                                                                                                                                                                                                                                                                                                                                                                                                                                                                                                                                                                                                                                                                                                                                                                                                                                                                                                                                                                                                                                                                                                                                                                                                                                                                                                                                                                                                                                                |      |  |   |                                            |  |  |                    |         |                                      |                    |         |                                                         |                    |         |                                      |                    |         |           |                                |  |  |            |                  |  |  |               |  |  |                  |  |            |                  |           |  |               |  |  |                 |  |            |                  |             |  |               |  |  |                 |  |            |                  |           |  |               |  |  |                  |  |            |  |  |          |  |   |            |            |  |            |            |              |            |            |             |            |            |           |
| <i>TPL</i>                                                                                                                                                                                  | -107 SD145                                                                                                                                                                                                                                                                                                                                     | NS vs CPL                                                                                                                                                                                                                                                                                     |                                                                                                                                                                                                                                                                                                                                                                                                                                                                                                                                                                                                                                                                                                                                                                                                                                                                                                                                                                                                                                                                                                                                                                                                                                                                                                                                                                                                                                                                                                                                                                                                                                                                                                |      |  |   |                                            |  |  |                    |         |                                      |                    |         |                                                         |                    |         |                                      |                    |         |           |                                |  |  |            |                  |  |  |               |  |  |                  |  |            |                  |           |  |               |  |  |                 |  |            |                  |             |  |               |  |  |                 |  |            |                  |           |  |               |  |  |                  |  |            |  |  |          |  |   |            |            |  |            |            |              |            |            |             |            |            |           |
| <p><b>Jorge 201 Brazil</b>[51]</p> <p><b>Design:</b> Prospective RCT</p> <p><b>Follow-up:</b> 24 and 48 weeks [To date, 73% and 56% of patients completed 24 and 48 weeks respectively]</p> | <p><b>N:</b> 63 eyes of 47 patients</p> <p><b>Inclusion criteria:</b> Refractory cener-involving DMO</p> <p><b>Exclusion criteria:</b> NR</p> <p><b>Age:</b> NR</p> <p><b>Sex:</b> NR</p> <p><b>Diabetes type:</b> NR</p> <p><b>HbA1c:</b> NR</p> <p><b>Baseline VA:</b> NR</p> <p><b>Baseline CMT:</b> NR</p> <p><b>Comorbidities:</b> NR</p> | <p><b>Group 1 (IVB 1.5 mg, n=NR):</b> injections at baseline and monthly if CSFT (central subfield thickness) measured by SDOCT (spectral domain OCT) &gt;275 µm.</p> <p><b>Group 2 (IVR 0.5 mg, n=NR) :</b> injections at baseline and monthly if CSFT &gt;275 µm.</p>                       | <p><b>At 48 weeks</b></p> <table border="1"> <thead> <tr> <th colspan="2">BCVA</th> <th>p</th> </tr> <tr> <th colspan="3">Mean BCVA reduction from baseline (logMAR)</th> </tr> </thead> <tbody> <tr> <td><i>IVB1.5</i></td> <td>-0.21</td> <td>vs baseline &lt;0.05 at all-time points</td> </tr> <tr> <td></td> <td></td> <td>vs IVR0.5: no significant difference at all time-points</td> </tr> <tr> <td><i>IVR0.5</i></td> <td>-0.21</td> <td>vs baseline &lt;0.05 at all time-points</td> </tr> </tbody> </table>                                                                                                                                                                                                                                                                                                                                                                                                                                                                                                                                                                                                                                                                                                                                                                                                                                                                                                                                                                                                                                                                                                                                                                         | BCVA |  | p | Mean BCVA reduction from baseline (logMAR) |  |  | <i>IVB1.5</i>      | -0.21   | vs baseline <0.05 at all-time points |                    |         | vs IVR0.5: no significant difference at all time-points | <i>IVR0.5</i>      | -0.21   | vs baseline <0.05 at all time-points |                    |         |           |                                |  |  |            |                  |  |  |               |  |  |                  |  |            |                  |           |  |               |  |  |                 |  |            |                  |             |  |               |  |  |                 |  |            |                  |           |  |               |  |  |                  |  |            |  |  |          |  |   |            |            |  |            |            |              |            |            |             |            |            |           |
| BCVA                                                                                                                                                                                        |                                                                                                                                                                                                                                                                                                                                                | p                                                                                                                                                                                                                                                                                             |                                                                                                                                                                                                                                                                                                                                                                                                                                                                                                                                                                                                                                                                                                                                                                                                                                                                                                                                                                                                                                                                                                                                                                                                                                                                                                                                                                                                                                                                                                                                                                                                                                                                                                |      |  |   |                                            |  |  |                    |         |                                      |                    |         |                                                         |                    |         |                                      |                    |         |           |                                |  |  |            |                  |  |  |               |  |  |                  |  |            |                  |           |  |               |  |  |                 |  |            |                  |             |  |               |  |  |                 |  |            |                  |           |  |               |  |  |                  |  |            |  |  |          |  |   |            |            |  |            |            |              |            |            |             |            |            |           |
| Mean BCVA reduction from baseline (logMAR)                                                                                                                                                  |                                                                                                                                                                                                                                                                                                                                                |                                                                                                                                                                                                                                                                                               |                                                                                                                                                                                                                                                                                                                                                                                                                                                                                                                                                                                                                                                                                                                                                                                                                                                                                                                                                                                                                                                                                                                                                                                                                                                                                                                                                                                                                                                                                                                                                                                                                                                                                                |      |  |   |                                            |  |  |                    |         |                                      |                    |         |                                                         |                    |         |                                      |                    |         |           |                                |  |  |            |                  |  |  |               |  |  |                  |  |            |                  |           |  |               |  |  |                 |  |            |                  |             |  |               |  |  |                 |  |            |                  |           |  |               |  |  |                  |  |            |  |  |          |  |   |            |            |  |            |            |              |            |            |             |            |            |           |
| <i>IVB1.5</i>                                                                                                                                                                               | -0.21                                                                                                                                                                                                                                                                                                                                          | vs baseline <0.05 at all-time points                                                                                                                                                                                                                                                          |                                                                                                                                                                                                                                                                                                                                                                                                                                                                                                                                                                                                                                                                                                                                                                                                                                                                                                                                                                                                                                                                                                                                                                                                                                                                                                                                                                                                                                                                                                                                                                                                                                                                                                |      |  |   |                                            |  |  |                    |         |                                      |                    |         |                                                         |                    |         |                                      |                    |         |           |                                |  |  |            |                  |  |  |               |  |  |                  |  |            |                  |           |  |               |  |  |                 |  |            |                  |             |  |               |  |  |                 |  |            |                  |           |  |               |  |  |                  |  |            |  |  |          |  |   |            |            |  |            |            |              |            |            |             |            |            |           |
|                                                                                                                                                                                             |                                                                                                                                                                                                                                                                                                                                                | vs IVR0.5: no significant difference at all time-points                                                                                                                                                                                                                                       |                                                                                                                                                                                                                                                                                                                                                                                                                                                                                                                                                                                                                                                                                                                                                                                                                                                                                                                                                                                                                                                                                                                                                                                                                                                                                                                                                                                                                                                                                                                                                                                                                                                                                                |      |  |   |                                            |  |  |                    |         |                                      |                    |         |                                                         |                    |         |                                      |                    |         |           |                                |  |  |            |                  |  |  |               |  |  |                  |  |            |                  |           |  |               |  |  |                 |  |            |                  |             |  |               |  |  |                 |  |            |                  |           |  |               |  |  |                  |  |            |  |  |          |  |   |            |            |  |            |            |              |            |            |             |            |            |           |
| <i>IVR0.5</i>                                                                                                                                                                               | -0.21                                                                                                                                                                                                                                                                                                                                          | vs baseline <0.05 at all time-points                                                                                                                                                                                                                                                          |                                                                                                                                                                                                                                                                                                                                                                                                                                                                                                                                                                                                                                                                                                                                                                                                                                                                                                                                                                                                                                                                                                                                                                                                                                                                                                                                                                                                                                                                                                                                                                                                                                                                                                |      |  |   |                                            |  |  |                    |         |                                      |                    |         |                                                         |                    |         |                                      |                    |         |           |                                |  |  |            |                  |  |  |               |  |  |                  |  |            |                  |           |  |               |  |  |                 |  |            |                  |             |  |               |  |  |                 |  |            |                  |           |  |               |  |  |                  |  |            |  |  |          |  |   |            |            |  |            |            |              |            |            |             |            |            |           |

1  
2  
3  
4  
5  
6  
7  
8  
9  
10  
11  
12  
13  
14  
15  
16  
17  
18  
19  
20  
21  
22  
23  
24  
25  
26  
27  
28  
29  
30  
31  
32  
33  
34  
35  
36  
37  
38  
39  
40  
41  
42  
43  
44  
45  
46  
47  
48  
49

| Study                                                                                                       | Participants and baseline values                                                                                                                                                                                                                                                                                                                                                                                                                                                                                                                                                                                                                                                                                                                                                                                                                     | Intervention                                                                                                                                                                                                                                                                                                                                                                                                                                                                                                                                                                                           | Outcome (change from baseline at study end)                                                                                                                                                                                                                                                                                                                                                                                                                                                                                                                                                                                                                                                                                                                                                                                                                                                     |      |               |   |                |                                   |       |               |           |                                      |                                                        |       |  |               |           |                                      |                                                        |       |            |      |                  |            |      |
|-------------------------------------------------------------------------------------------------------------|------------------------------------------------------------------------------------------------------------------------------------------------------------------------------------------------------------------------------------------------------------------------------------------------------------------------------------------------------------------------------------------------------------------------------------------------------------------------------------------------------------------------------------------------------------------------------------------------------------------------------------------------------------------------------------------------------------------------------------------------------------------------------------------------------------------------------------------------------|--------------------------------------------------------------------------------------------------------------------------------------------------------------------------------------------------------------------------------------------------------------------------------------------------------------------------------------------------------------------------------------------------------------------------------------------------------------------------------------------------------------------------------------------------------------------------------------------------------|-------------------------------------------------------------------------------------------------------------------------------------------------------------------------------------------------------------------------------------------------------------------------------------------------------------------------------------------------------------------------------------------------------------------------------------------------------------------------------------------------------------------------------------------------------------------------------------------------------------------------------------------------------------------------------------------------------------------------------------------------------------------------------------------------------------------------------------------------------------------------------------------------|------|---------------|---|----------------|-----------------------------------|-------|---------------|-----------|--------------------------------------|--------------------------------------------------------|-------|--|---------------|-----------|--------------------------------------|--------------------------------------------------------|-------|------------|------|------------------|------------|------|
|                                                                                                             |                                                                                                                                                                                                                                                                                                                                                                                                                                                                                                                                                                                                                                                                                                                                                                                                                                                      |                                                                                                                                                                                                                                                                                                                                                                                                                                                                                                                                                                                                        | <p style="text-align: right;">vs IVB1.5: no significant difference at all time-points</p> <hr/> <table border="1" style="width: 100%; border-collapse: collapse;"> <thead> <tr> <th colspan="3" style="text-align: left;">CSFT</th> </tr> <tr> <th style="width: 30%;"></th> <th style="width: 40%;">Mean CSFT reduction from baseline</th> <th style="width: 30%;">p</th> </tr> </thead> <tbody> <tr> <td><i>IVB1.5</i></td> <td>-129.6 μm</td> <td>vs baseline &lt;0.05 at all-time points</td> </tr> <tr> <td colspan="3" style="text-align: right;">vs IVR0.5 no significant difference at all-time points</td> </tr> <tr> <td><i>IVR0.5</i></td> <td>-137.9 μm</td> <td>vs baseline &lt;0.05 at all-time points</td> </tr> <tr> <td colspan="3" style="text-align: right;">vs IVB1.5 no significant difference at all-time points</td> </tr> </tbody> </table>                             | CSFT |               |   |                | Mean CSFT reduction from baseline | p     | <i>IVB1.5</i> | -129.6 μm | vs baseline <0.05 at all-time points | vs IVR0.5 no significant difference at all-time points |       |  | <i>IVR0.5</i> | -137.9 μm | vs baseline <0.05 at all-time points | vs IVB1.5 no significant difference at all-time points |       |            |      |                  |            |      |
| CSFT                                                                                                        |                                                                                                                                                                                                                                                                                                                                                                                                                                                                                                                                                                                                                                                                                                                                                                                                                                                      |                                                                                                                                                                                                                                                                                                                                                                                                                                                                                                                                                                                                        |                                                                                                                                                                                                                                                                                                                                                                                                                                                                                                                                                                                                                                                                                                                                                                                                                                                                                                 |      |               |   |                |                                   |       |               |           |                                      |                                                        |       |  |               |           |                                      |                                                        |       |            |      |                  |            |      |
|                                                                                                             | Mean CSFT reduction from baseline                                                                                                                                                                                                                                                                                                                                                                                                                                                                                                                                                                                                                                                                                                                                                                                                                    | p                                                                                                                                                                                                                                                                                                                                                                                                                                                                                                                                                                                                      |                                                                                                                                                                                                                                                                                                                                                                                                                                                                                                                                                                                                                                                                                                                                                                                                                                                                                                 |      |               |   |                |                                   |       |               |           |                                      |                                                        |       |  |               |           |                                      |                                                        |       |            |      |                  |            |      |
| <i>IVB1.5</i>                                                                                               | -129.6 μm                                                                                                                                                                                                                                                                                                                                                                                                                                                                                                                                                                                                                                                                                                                                                                                                                                            | vs baseline <0.05 at all-time points                                                                                                                                                                                                                                                                                                                                                                                                                                                                                                                                                                   |                                                                                                                                                                                                                                                                                                                                                                                                                                                                                                                                                                                                                                                                                                                                                                                                                                                                                                 |      |               |   |                |                                   |       |               |           |                                      |                                                        |       |  |               |           |                                      |                                                        |       |            |      |                  |            |      |
| vs IVR0.5 no significant difference at all-time points                                                      |                                                                                                                                                                                                                                                                                                                                                                                                                                                                                                                                                                                                                                                                                                                                                                                                                                                      |                                                                                                                                                                                                                                                                                                                                                                                                                                                                                                                                                                                                        |                                                                                                                                                                                                                                                                                                                                                                                                                                                                                                                                                                                                                                                                                                                                                                                                                                                                                                 |      |               |   |                |                                   |       |               |           |                                      |                                                        |       |  |               |           |                                      |                                                        |       |            |      |                  |            |      |
| <i>IVR0.5</i>                                                                                               | -137.9 μm                                                                                                                                                                                                                                                                                                                                                                                                                                                                                                                                                                                                                                                                                                                                                                                                                                            | vs baseline <0.05 at all-time points                                                                                                                                                                                                                                                                                                                                                                                                                                                                                                                                                                   |                                                                                                                                                                                                                                                                                                                                                                                                                                                                                                                                                                                                                                                                                                                                                                                                                                                                                                 |      |               |   |                |                                   |       |               |           |                                      |                                                        |       |  |               |           |                                      |                                                        |       |            |      |                  |            |      |
| vs IVB1.5 no significant difference at all-time points                                                      |                                                                                                                                                                                                                                                                                                                                                                                                                                                                                                                                                                                                                                                                                                                                                                                                                                                      |                                                                                                                                                                                                                                                                                                                                                                                                                                                                                                                                                                                                        |                                                                                                                                                                                                                                                                                                                                                                                                                                                                                                                                                                                                                                                                                                                                                                                                                                                                                                 |      |               |   |                |                                   |       |               |           |                                      |                                                        |       |  |               |           |                                      |                                                        |       |            |      |                  |            |      |
| <p><b>Lim 2012</b>[55]<br/><b>Korea</b></p> <p><b>Design:</b> 3-arm RCT<br/><b>Follow-up:</b> 12 months</p> | <p><b>N:</b> 111 eyes of 105 patients<br/><b>Inclusion criteria:</b> eyes with clinically significant DMO based on ETDRS and DMO with central macular thickness of at least 300 μm by optical coherence tomography (OCT).<br/><b>Exclusion criteria:</b> unstable medical status, including glycemic control and blood pressure; any previous treatment for DMO, including intravitreal, sub-Tenon injection or macular photocoagulation, history of vitreoretinal surgery, uncontrolled glaucoma; proliferative diabetic retinopathy with active neovascularization, previous panretinal photocoagulation, presence of vitreomacular traction, history of systemic corticosteroids within 6 months, contraindications for bevacizumab or triamcinolone acetonide.<br/><b>Age:</b> 60.4 SD 7.4 (range 48 to 70) years<br/><b>Sex:</b> 52% female</p> | <p><b>Group 1 (IVB/IVT, n=36):</b> IV injection of 1.25 mg (0.05 ml) IVB at 0 and 6 weeks and IV injection of 2 mg (0.05 ml) IVT at 0 weeks. Mean number of addition injection 1.28<br/><b>Group 2 (IVB, n=38):</b> IV injection of 1.25 mg (0.05 ml) IVB at 0 and 6 weeks. Mean number of injections 2.54.<br/><b>Group 3 (IVT, n=37):</b> IV injection of 2 mg (0.05 ml) IVT at 0 weeks. Mean number of injections 1.04</p> <p><b>Unclear if rescue laser was available</b></p> <p><b>IVB injections were repeated if CMT appeared &gt;300 μm on OCT in at least 6-weeks in all three groups</b></p> | <p>At 12 months</p> <hr/> <table border="1" style="width: 100%; border-collapse: collapse;"> <thead> <tr> <th style="width: 30%;"></th> <th style="width: 40%;">BCVA (logMAR)</th> <th style="width: 30%;">p</th> </tr> </thead> <tbody> <tr> <td><i>IVB/IVT</i></td> <td>-0.15</td> <td>0.088</td> </tr> <tr> <td><i>IVB</i></td> <td>-0.16</td> <td rowspan="2">(between groups)</td> </tr> <tr> <td><i>IVT</i></td> <td>-0.16</td> </tr> </tbody> </table> <hr/> <table border="1" style="width: 100%; border-collapse: collapse;"> <thead> <tr> <th style="width: 30%;"></th> <th style="width: 40%;">CMT (μm)</th> <th style="width: 30%;">p</th> </tr> </thead> <tbody> <tr> <td><i>IVB/IVT</i></td> <td>-199</td> <td>0.132</td> </tr> <tr> <td><i>IVB</i></td> <td>-179</td> <td rowspan="2">(between groups)</td> </tr> <tr> <td><i>IVT</i></td> <td>-200</td> </tr> </tbody> </table> |      | BCVA (logMAR) | p | <i>IVB/IVT</i> | -0.15                             | 0.088 | <i>IVB</i>    | -0.16     | (between groups)                     | <i>IVT</i>                                             | -0.16 |  | CMT (μm)      | p         | <i>IVB/IVT</i>                       | -199                                                   | 0.132 | <i>IVB</i> | -179 | (between groups) | <i>IVT</i> | -200 |
|                                                                                                             | BCVA (logMAR)                                                                                                                                                                                                                                                                                                                                                                                                                                                                                                                                                                                                                                                                                                                                                                                                                                        | p                                                                                                                                                                                                                                                                                                                                                                                                                                                                                                                                                                                                      |                                                                                                                                                                                                                                                                                                                                                                                                                                                                                                                                                                                                                                                                                                                                                                                                                                                                                                 |      |               |   |                |                                   |       |               |           |                                      |                                                        |       |  |               |           |                                      |                                                        |       |            |      |                  |            |      |
| <i>IVB/IVT</i>                                                                                              | -0.15                                                                                                                                                                                                                                                                                                                                                                                                                                                                                                                                                                                                                                                                                                                                                                                                                                                | 0.088                                                                                                                                                                                                                                                                                                                                                                                                                                                                                                                                                                                                  |                                                                                                                                                                                                                                                                                                                                                                                                                                                                                                                                                                                                                                                                                                                                                                                                                                                                                                 |      |               |   |                |                                   |       |               |           |                                      |                                                        |       |  |               |           |                                      |                                                        |       |            |      |                  |            |      |
| <i>IVB</i>                                                                                                  | -0.16                                                                                                                                                                                                                                                                                                                                                                                                                                                                                                                                                                                                                                                                                                                                                                                                                                                | (between groups)                                                                                                                                                                                                                                                                                                                                                                                                                                                                                                                                                                                       |                                                                                                                                                                                                                                                                                                                                                                                                                                                                                                                                                                                                                                                                                                                                                                                                                                                                                                 |      |               |   |                |                                   |       |               |           |                                      |                                                        |       |  |               |           |                                      |                                                        |       |            |      |                  |            |      |
| <i>IVT</i>                                                                                                  | -0.16                                                                                                                                                                                                                                                                                                                                                                                                                                                                                                                                                                                                                                                                                                                                                                                                                                                |                                                                                                                                                                                                                                                                                                                                                                                                                                                                                                                                                                                                        |                                                                                                                                                                                                                                                                                                                                                                                                                                                                                                                                                                                                                                                                                                                                                                                                                                                                                                 |      |               |   |                |                                   |       |               |           |                                      |                                                        |       |  |               |           |                                      |                                                        |       |            |      |                  |            |      |
|                                                                                                             | CMT (μm)                                                                                                                                                                                                                                                                                                                                                                                                                                                                                                                                                                                                                                                                                                                                                                                                                                             | p                                                                                                                                                                                                                                                                                                                                                                                                                                                                                                                                                                                                      |                                                                                                                                                                                                                                                                                                                                                                                                                                                                                                                                                                                                                                                                                                                                                                                                                                                                                                 |      |               |   |                |                                   |       |               |           |                                      |                                                        |       |  |               |           |                                      |                                                        |       |            |      |                  |            |      |
| <i>IVB/IVT</i>                                                                                              | -199                                                                                                                                                                                                                                                                                                                                                                                                                                                                                                                                                                                                                                                                                                                                                                                                                                                 | 0.132                                                                                                                                                                                                                                                                                                                                                                                                                                                                                                                                                                                                  |                                                                                                                                                                                                                                                                                                                                                                                                                                                                                                                                                                                                                                                                                                                                                                                                                                                                                                 |      |               |   |                |                                   |       |               |           |                                      |                                                        |       |  |               |           |                                      |                                                        |       |            |      |                  |            |      |
| <i>IVB</i>                                                                                                  | -179                                                                                                                                                                                                                                                                                                                                                                                                                                                                                                                                                                                                                                                                                                                                                                                                                                                 | (between groups)                                                                                                                                                                                                                                                                                                                                                                                                                                                                                                                                                                                       |                                                                                                                                                                                                                                                                                                                                                                                                                                                                                                                                                                                                                                                                                                                                                                                                                                                                                                 |      |               |   |                |                                   |       |               |           |                                      |                                                        |       |  |               |           |                                      |                                                        |       |            |      |                  |            |      |
| <i>IVT</i>                                                                                                  | -200                                                                                                                                                                                                                                                                                                                                                                                                                                                                                                                                                                                                                                                                                                                                                                                                                                                 |                                                                                                                                                                                                                                                                                                                                                                                                                                                                                                                                                                                                        |                                                                                                                                                                                                                                                                                                                                                                                                                                                                                                                                                                                                                                                                                                                                                                                                                                                                                                 |      |               |   |                |                                   |       |               |           |                                      |                                                        |       |  |               |           |                                      |                                                        |       |            |      |                  |            |      |

1  
2  
3  
4  
5  
6  
7  
8  
9  
10  
11  
12  
13  
14  
15  
16  
17  
18  
19  
20  
21  
22  
23  
24  
25  
26  
27  
28  
29  
30  
31  
32  
33  
34  
35  
36  
37  
38  
39  
40  
41  
42  
43  
44  
45  
46  
47  
48  
49

| Study                                                                                                                                                                                                                                                                             | Participants and baseline values                                                                                                                                                                                                                                                                                                                                                                                                                                                                                                                                                                                                                                                                                                                                                                                                                                                                                                                                                            | Intervention                                                                                                                                                                                                                                                                                                                                                                                                                                                                                                                  | Outcome (change from baseline at study end)                                                                                                                                                                                                                                                                                                                                                                                                                                                                                                                                                                                                                                                                                                                                                                                                                                                                                                                                                                                                                                                                                                                                                                                                                                                                                                                                                                                                                                                                                                                                                                                                                                                                                                                                                                                                                   |  |                   |   |            |                                      |                         |                |                                     |           |            |                                       |  |            |                         |                   |  |                              |  |                        |                |                         |  |  |                              |  |                         |            |                         |  |  |                              |  |                         |  |              |   |            |           |                                      |                |          |  |            |         |  |
|-----------------------------------------------------------------------------------------------------------------------------------------------------------------------------------------------------------------------------------------------------------------------------------|---------------------------------------------------------------------------------------------------------------------------------------------------------------------------------------------------------------------------------------------------------------------------------------------------------------------------------------------------------------------------------------------------------------------------------------------------------------------------------------------------------------------------------------------------------------------------------------------------------------------------------------------------------------------------------------------------------------------------------------------------------------------------------------------------------------------------------------------------------------------------------------------------------------------------------------------------------------------------------------------|-------------------------------------------------------------------------------------------------------------------------------------------------------------------------------------------------------------------------------------------------------------------------------------------------------------------------------------------------------------------------------------------------------------------------------------------------------------------------------------------------------------------------------|---------------------------------------------------------------------------------------------------------------------------------------------------------------------------------------------------------------------------------------------------------------------------------------------------------------------------------------------------------------------------------------------------------------------------------------------------------------------------------------------------------------------------------------------------------------------------------------------------------------------------------------------------------------------------------------------------------------------------------------------------------------------------------------------------------------------------------------------------------------------------------------------------------------------------------------------------------------------------------------------------------------------------------------------------------------------------------------------------------------------------------------------------------------------------------------------------------------------------------------------------------------------------------------------------------------------------------------------------------------------------------------------------------------------------------------------------------------------------------------------------------------------------------------------------------------------------------------------------------------------------------------------------------------------------------------------------------------------------------------------------------------------------------------------------------------------------------------------------------------|--|-------------------|---|------------|--------------------------------------|-------------------------|----------------|-------------------------------------|-----------|------------|---------------------------------------|--|------------|-------------------------|-------------------|--|------------------------------|--|------------------------|----------------|-------------------------|--|--|------------------------------|--|-------------------------|------------|-------------------------|--|--|------------------------------|--|-------------------------|--|--------------|---|------------|-----------|--------------------------------------|----------------|----------|--|------------|---------|--|
| <p><b>Soheilian 2007 / Soheilian 2009/ Soheilian 2011/ Soheilian 2012</b><br/>[37,41,54,140]<br/><b>Iran</b></p> <p><b>Design:</b> 3-arm RCT<br/><b>Follow-up:</b> 36 weeks</p> <p>[Soheilian 2007 reports 12 week results of the same trial, these were not considered here]</p> | <p><b>Diabetes type:</b> NR<br/><b>HbA1c:</b> 7.2 SD 1.2 to 7.4 SD1.2<br/><b>Baseline VA:</b> 0.62 SD 0.23 to 0.65 SD 0.28 logMAR<br/><b>Baseline CMT:</b> 447 SD 110 to 458 SD 92 μm<br/><b>Comorbidities:</b> NR</p> <p><b>N:</b> 150 eyes of 129 patients<br/><b>Inclusion criteria:</b> eyes with clinically significant DMO (ETDRS criteria)<br/><b>Exclusion criteria:</b> previous panretinal of focal laser photocoagulation, prior ocular surgery or injection, history of glaucoma or ocular hypertension, VA ≥20/40 or &lt;20/300, iris neovascularization, high risk PDR, significant media opacity, monocularly, pregnancy, serum creatinine ≥3 mg/dL, uncontrolled DM<br/><b>Age:</b> 61.2 SD6.1 years<br/><b>Sex:</b> 47.3% female<br/><b>Diabetes type:</b> not reported<br/><b>HbA1c:</b> not reported<br/><b>Baseline VA:</b> 0.55 to 0.73 SD0.26 to 0.28 logMAR<br/><b>Baseline CMT:</b> 300 to 359 SD118 to 149 μm<br/><b>Comorbidities:</b> 94% NPDR, 6% early PDR</p> | <p><b>Group 1 (IVB, n=50 eyes):</b> IV injection of bevacizumab 1.25 mg (0.05 ml) (retreatment IVB 14 eyes)<br/><b>Group 2 (IVB/IVT, n=50 eyes):</b> IV injection of combined bevacizumab (1.25 mg (0.05 ml)) and triamcinolone (2 mg (0.05 ml)), followed by two injections of bevacizumab alone (retreatment IVB/IVT 10 eyes)<br/><b>Group 3 (MPC, n=50 eyes):</b> focal or modified grid laser (retreatment MPC 3 eyes)<br/><b>Regimen for all groups:</b><br/>Retreatments performed at 12 week intervals as required</p> | <p><b>At 36 weeks</b></p> <p><b>BCVA (Snellen chart):</b></p> <table border="1"> <thead> <tr> <th></th> <th>BCVA (logMAR), SD</th> <th>p</th> </tr> </thead> <tbody> <tr> <td><b>IVB</b></td> <td>-0.28 SD0.25<br/>[+14 SD12.5 letters]</td> <td>0.053 vs IVB/IVT or MPC</td> </tr> <tr> <td><b>IVB/IVT</b></td> <td>-0.04 SD0.33<br/>[+2 SD16.5 letters]</td> <td>NS vs MPC</td> </tr> <tr> <td><b>MPC</b></td> <td>+0.01 SD0.27<br/>[-0.5 SD13.5 letters]</td> <td></td> </tr> </tbody> </table> <p><b>Snellen line changes</b></p> <table border="1"> <tbody> <tr> <td><b>IVB</b></td> <td>+2 lines or more: 37.0%</td> <td rowspan="3">NS between groups</td> </tr> <tr> <td></td> <td>stable within 2 lines: 59.3%</td> </tr> <tr> <td></td> <td>-2 lines or more: 3.7%</td> </tr> <tr> <td><b>IVB/IVT</b></td> <td>+2 lines or more: 25.0%</td> <td rowspan="3"></td> </tr> <tr> <td></td> <td>stable within 2 lines: 54.2%</td> </tr> <tr> <td></td> <td>-2 lines or more: 20.8%</td> </tr> <tr> <td><b>MPC</b></td> <td>+2 lines or more: 14.8%</td> <td rowspan="3"></td> </tr> <tr> <td></td> <td>stable within 2 lines: 66.7%</td> </tr> <tr> <td></td> <td>-2 lines or more: 18.5%</td> </tr> </tbody> </table> <p><b>CMT (OCT):</b></p> <table border="1"> <thead> <tr> <th></th> <th>CMT (μm), SD</th> <th>p</th> </tr> </thead> <tbody> <tr> <td><b>IVB</b></td> <td>-56 SD140</td> <td>0.044 vs baseline, NS between groups</td> </tr> <tr> <td><b>IVB/IVT</b></td> <td>-5 SD113</td> <td></td> </tr> <tr> <td><b>MPC</b></td> <td>-8 SD67</td> <td></td> </tr> </tbody> </table> <p>Subgroups:</p> <ul style="list-style-type: none"> <li>larger CMT reduction in subgroup with ≥400 μm at baseline (36 weeks: IVB -27.2 SD34.8%, IVB/IVT -8.8 SD35.9%, MPC -15.1 SD14.6%, p&lt;0.001 versus baseline in IVB and MPC groups only)</li> </ul> |  | BCVA (logMAR), SD | p | <b>IVB</b> | -0.28 SD0.25<br>[+14 SD12.5 letters] | 0.053 vs IVB/IVT or MPC | <b>IVB/IVT</b> | -0.04 SD0.33<br>[+2 SD16.5 letters] | NS vs MPC | <b>MPC</b> | +0.01 SD0.27<br>[-0.5 SD13.5 letters] |  | <b>IVB</b> | +2 lines or more: 37.0% | NS between groups |  | stable within 2 lines: 59.3% |  | -2 lines or more: 3.7% | <b>IVB/IVT</b> | +2 lines or more: 25.0% |  |  | stable within 2 lines: 54.2% |  | -2 lines or more: 20.8% | <b>MPC</b> | +2 lines or more: 14.8% |  |  | stable within 2 lines: 66.7% |  | -2 lines or more: 18.5% |  | CMT (μm), SD | p | <b>IVB</b> | -56 SD140 | 0.044 vs baseline, NS between groups | <b>IVB/IVT</b> | -5 SD113 |  | <b>MPC</b> | -8 SD67 |  |
|                                                                                                                                                                                                                                                                                   | BCVA (logMAR), SD                                                                                                                                                                                                                                                                                                                                                                                                                                                                                                                                                                                                                                                                                                                                                                                                                                                                                                                                                                           | p                                                                                                                                                                                                                                                                                                                                                                                                                                                                                                                             |                                                                                                                                                                                                                                                                                                                                                                                                                                                                                                                                                                                                                                                                                                                                                                                                                                                                                                                                                                                                                                                                                                                                                                                                                                                                                                                                                                                                                                                                                                                                                                                                                                                                                                                                                                                                                                                               |  |                   |   |            |                                      |                         |                |                                     |           |            |                                       |  |            |                         |                   |  |                              |  |                        |                |                         |  |  |                              |  |                         |            |                         |  |  |                              |  |                         |  |              |   |            |           |                                      |                |          |  |            |         |  |
| <b>IVB</b>                                                                                                                                                                                                                                                                        | -0.28 SD0.25<br>[+14 SD12.5 letters]                                                                                                                                                                                                                                                                                                                                                                                                                                                                                                                                                                                                                                                                                                                                                                                                                                                                                                                                                        | 0.053 vs IVB/IVT or MPC                                                                                                                                                                                                                                                                                                                                                                                                                                                                                                       |                                                                                                                                                                                                                                                                                                                                                                                                                                                                                                                                                                                                                                                                                                                                                                                                                                                                                                                                                                                                                                                                                                                                                                                                                                                                                                                                                                                                                                                                                                                                                                                                                                                                                                                                                                                                                                                               |  |                   |   |            |                                      |                         |                |                                     |           |            |                                       |  |            |                         |                   |  |                              |  |                        |                |                         |  |  |                              |  |                         |            |                         |  |  |                              |  |                         |  |              |   |            |           |                                      |                |          |  |            |         |  |
| <b>IVB/IVT</b>                                                                                                                                                                                                                                                                    | -0.04 SD0.33<br>[+2 SD16.5 letters]                                                                                                                                                                                                                                                                                                                                                                                                                                                                                                                                                                                                                                                                                                                                                                                                                                                                                                                                                         | NS vs MPC                                                                                                                                                                                                                                                                                                                                                                                                                                                                                                                     |                                                                                                                                                                                                                                                                                                                                                                                                                                                                                                                                                                                                                                                                                                                                                                                                                                                                                                                                                                                                                                                                                                                                                                                                                                                                                                                                                                                                                                                                                                                                                                                                                                                                                                                                                                                                                                                               |  |                   |   |            |                                      |                         |                |                                     |           |            |                                       |  |            |                         |                   |  |                              |  |                        |                |                         |  |  |                              |  |                         |            |                         |  |  |                              |  |                         |  |              |   |            |           |                                      |                |          |  |            |         |  |
| <b>MPC</b>                                                                                                                                                                                                                                                                        | +0.01 SD0.27<br>[-0.5 SD13.5 letters]                                                                                                                                                                                                                                                                                                                                                                                                                                                                                                                                                                                                                                                                                                                                                                                                                                                                                                                                                       |                                                                                                                                                                                                                                                                                                                                                                                                                                                                                                                               |                                                                                                                                                                                                                                                                                                                                                                                                                                                                                                                                                                                                                                                                                                                                                                                                                                                                                                                                                                                                                                                                                                                                                                                                                                                                                                                                                                                                                                                                                                                                                                                                                                                                                                                                                                                                                                                               |  |                   |   |            |                                      |                         |                |                                     |           |            |                                       |  |            |                         |                   |  |                              |  |                        |                |                         |  |  |                              |  |                         |            |                         |  |  |                              |  |                         |  |              |   |            |           |                                      |                |          |  |            |         |  |
| <b>IVB</b>                                                                                                                                                                                                                                                                        | +2 lines or more: 37.0%                                                                                                                                                                                                                                                                                                                                                                                                                                                                                                                                                                                                                                                                                                                                                                                                                                                                                                                                                                     | NS between groups                                                                                                                                                                                                                                                                                                                                                                                                                                                                                                             |                                                                                                                                                                                                                                                                                                                                                                                                                                                                                                                                                                                                                                                                                                                                                                                                                                                                                                                                                                                                                                                                                                                                                                                                                                                                                                                                                                                                                                                                                                                                                                                                                                                                                                                                                                                                                                                               |  |                   |   |            |                                      |                         |                |                                     |           |            |                                       |  |            |                         |                   |  |                              |  |                        |                |                         |  |  |                              |  |                         |            |                         |  |  |                              |  |                         |  |              |   |            |           |                                      |                |          |  |            |         |  |
|                                                                                                                                                                                                                                                                                   | stable within 2 lines: 59.3%                                                                                                                                                                                                                                                                                                                                                                                                                                                                                                                                                                                                                                                                                                                                                                                                                                                                                                                                                                |                                                                                                                                                                                                                                                                                                                                                                                                                                                                                                                               |                                                                                                                                                                                                                                                                                                                                                                                                                                                                                                                                                                                                                                                                                                                                                                                                                                                                                                                                                                                                                                                                                                                                                                                                                                                                                                                                                                                                                                                                                                                                                                                                                                                                                                                                                                                                                                                               |  |                   |   |            |                                      |                         |                |                                     |           |            |                                       |  |            |                         |                   |  |                              |  |                        |                |                         |  |  |                              |  |                         |            |                         |  |  |                              |  |                         |  |              |   |            |           |                                      |                |          |  |            |         |  |
|                                                                                                                                                                                                                                                                                   | -2 lines or more: 3.7%                                                                                                                                                                                                                                                                                                                                                                                                                                                                                                                                                                                                                                                                                                                                                                                                                                                                                                                                                                      |                                                                                                                                                                                                                                                                                                                                                                                                                                                                                                                               |                                                                                                                                                                                                                                                                                                                                                                                                                                                                                                                                                                                                                                                                                                                                                                                                                                                                                                                                                                                                                                                                                                                                                                                                                                                                                                                                                                                                                                                                                                                                                                                                                                                                                                                                                                                                                                                               |  |                   |   |            |                                      |                         |                |                                     |           |            |                                       |  |            |                         |                   |  |                              |  |                        |                |                         |  |  |                              |  |                         |            |                         |  |  |                              |  |                         |  |              |   |            |           |                                      |                |          |  |            |         |  |
| <b>IVB/IVT</b>                                                                                                                                                                                                                                                                    | +2 lines or more: 25.0%                                                                                                                                                                                                                                                                                                                                                                                                                                                                                                                                                                                                                                                                                                                                                                                                                                                                                                                                                                     |                                                                                                                                                                                                                                                                                                                                                                                                                                                                                                                               |                                                                                                                                                                                                                                                                                                                                                                                                                                                                                                                                                                                                                                                                                                                                                                                                                                                                                                                                                                                                                                                                                                                                                                                                                                                                                                                                                                                                                                                                                                                                                                                                                                                                                                                                                                                                                                                               |  |                   |   |            |                                      |                         |                |                                     |           |            |                                       |  |            |                         |                   |  |                              |  |                        |                |                         |  |  |                              |  |                         |            |                         |  |  |                              |  |                         |  |              |   |            |           |                                      |                |          |  |            |         |  |
|                                                                                                                                                                                                                                                                                   | stable within 2 lines: 54.2%                                                                                                                                                                                                                                                                                                                                                                                                                                                                                                                                                                                                                                                                                                                                                                                                                                                                                                                                                                |                                                                                                                                                                                                                                                                                                                                                                                                                                                                                                                               |                                                                                                                                                                                                                                                                                                                                                                                                                                                                                                                                                                                                                                                                                                                                                                                                                                                                                                                                                                                                                                                                                                                                                                                                                                                                                                                                                                                                                                                                                                                                                                                                                                                                                                                                                                                                                                                               |  |                   |   |            |                                      |                         |                |                                     |           |            |                                       |  |            |                         |                   |  |                              |  |                        |                |                         |  |  |                              |  |                         |            |                         |  |  |                              |  |                         |  |              |   |            |           |                                      |                |          |  |            |         |  |
|                                                                                                                                                                                                                                                                                   | -2 lines or more: 20.8%                                                                                                                                                                                                                                                                                                                                                                                                                                                                                                                                                                                                                                                                                                                                                                                                                                                                                                                                                                     |                                                                                                                                                                                                                                                                                                                                                                                                                                                                                                                               |                                                                                                                                                                                                                                                                                                                                                                                                                                                                                                                                                                                                                                                                                                                                                                                                                                                                                                                                                                                                                                                                                                                                                                                                                                                                                                                                                                                                                                                                                                                                                                                                                                                                                                                                                                                                                                                               |  |                   |   |            |                                      |                         |                |                                     |           |            |                                       |  |            |                         |                   |  |                              |  |                        |                |                         |  |  |                              |  |                         |            |                         |  |  |                              |  |                         |  |              |   |            |           |                                      |                |          |  |            |         |  |
| <b>MPC</b>                                                                                                                                                                                                                                                                        | +2 lines or more: 14.8%                                                                                                                                                                                                                                                                                                                                                                                                                                                                                                                                                                                                                                                                                                                                                                                                                                                                                                                                                                     |                                                                                                                                                                                                                                                                                                                                                                                                                                                                                                                               |                                                                                                                                                                                                                                                                                                                                                                                                                                                                                                                                                                                                                                                                                                                                                                                                                                                                                                                                                                                                                                                                                                                                                                                                                                                                                                                                                                                                                                                                                                                                                                                                                                                                                                                                                                                                                                                               |  |                   |   |            |                                      |                         |                |                                     |           |            |                                       |  |            |                         |                   |  |                              |  |                        |                |                         |  |  |                              |  |                         |            |                         |  |  |                              |  |                         |  |              |   |            |           |                                      |                |          |  |            |         |  |
|                                                                                                                                                                                                                                                                                   | stable within 2 lines: 66.7%                                                                                                                                                                                                                                                                                                                                                                                                                                                                                                                                                                                                                                                                                                                                                                                                                                                                                                                                                                |                                                                                                                                                                                                                                                                                                                                                                                                                                                                                                                               |                                                                                                                                                                                                                                                                                                                                                                                                                                                                                                                                                                                                                                                                                                                                                                                                                                                                                                                                                                                                                                                                                                                                                                                                                                                                                                                                                                                                                                                                                                                                                                                                                                                                                                                                                                                                                                                               |  |                   |   |            |                                      |                         |                |                                     |           |            |                                       |  |            |                         |                   |  |                              |  |                        |                |                         |  |  |                              |  |                         |            |                         |  |  |                              |  |                         |  |              |   |            |           |                                      |                |          |  |            |         |  |
|                                                                                                                                                                                                                                                                                   | -2 lines or more: 18.5%                                                                                                                                                                                                                                                                                                                                                                                                                                                                                                                                                                                                                                                                                                                                                                                                                                                                                                                                                                     |                                                                                                                                                                                                                                                                                                                                                                                                                                                                                                                               |                                                                                                                                                                                                                                                                                                                                                                                                                                                                                                                                                                                                                                                                                                                                                                                                                                                                                                                                                                                                                                                                                                                                                                                                                                                                                                                                                                                                                                                                                                                                                                                                                                                                                                                                                                                                                                                               |  |                   |   |            |                                      |                         |                |                                     |           |            |                                       |  |            |                         |                   |  |                              |  |                        |                |                         |  |  |                              |  |                         |            |                         |  |  |                              |  |                         |  |              |   |            |           |                                      |                |          |  |            |         |  |
|                                                                                                                                                                                                                                                                                   | CMT (μm), SD                                                                                                                                                                                                                                                                                                                                                                                                                                                                                                                                                                                                                                                                                                                                                                                                                                                                                                                                                                                | p                                                                                                                                                                                                                                                                                                                                                                                                                                                                                                                             |                                                                                                                                                                                                                                                                                                                                                                                                                                                                                                                                                                                                                                                                                                                                                                                                                                                                                                                                                                                                                                                                                                                                                                                                                                                                                                                                                                                                                                                                                                                                                                                                                                                                                                                                                                                                                                                               |  |                   |   |            |                                      |                         |                |                                     |           |            |                                       |  |            |                         |                   |  |                              |  |                        |                |                         |  |  |                              |  |                         |            |                         |  |  |                              |  |                         |  |              |   |            |           |                                      |                |          |  |            |         |  |
| <b>IVB</b>                                                                                                                                                                                                                                                                        | -56 SD140                                                                                                                                                                                                                                                                                                                                                                                                                                                                                                                                                                                                                                                                                                                                                                                                                                                                                                                                                                                   | 0.044 vs baseline, NS between groups                                                                                                                                                                                                                                                                                                                                                                                                                                                                                          |                                                                                                                                                                                                                                                                                                                                                                                                                                                                                                                                                                                                                                                                                                                                                                                                                                                                                                                                                                                                                                                                                                                                                                                                                                                                                                                                                                                                                                                                                                                                                                                                                                                                                                                                                                                                                                                               |  |                   |   |            |                                      |                         |                |                                     |           |            |                                       |  |            |                         |                   |  |                              |  |                        |                |                         |  |  |                              |  |                         |            |                         |  |  |                              |  |                         |  |              |   |            |           |                                      |                |          |  |            |         |  |
| <b>IVB/IVT</b>                                                                                                                                                                                                                                                                    | -5 SD113                                                                                                                                                                                                                                                                                                                                                                                                                                                                                                                                                                                                                                                                                                                                                                                                                                                                                                                                                                                    |                                                                                                                                                                                                                                                                                                                                                                                                                                                                                                                               |                                                                                                                                                                                                                                                                                                                                                                                                                                                                                                                                                                                                                                                                                                                                                                                                                                                                                                                                                                                                                                                                                                                                                                                                                                                                                                                                                                                                                                                                                                                                                                                                                                                                                                                                                                                                                                                               |  |                   |   |            |                                      |                         |                |                                     |           |            |                                       |  |            |                         |                   |  |                              |  |                        |                |                         |  |  |                              |  |                         |            |                         |  |  |                              |  |                         |  |              |   |            |           |                                      |                |          |  |            |         |  |
| <b>MPC</b>                                                                                                                                                                                                                                                                        | -8 SD67                                                                                                                                                                                                                                                                                                                                                                                                                                                                                                                                                                                                                                                                                                                                                                                                                                                                                                                                                                                     |                                                                                                                                                                                                                                                                                                                                                                                                                                                                                                                               |                                                                                                                                                                                                                                                                                                                                                                                                                                                                                                                                                                                                                                                                                                                                                                                                                                                                                                                                                                                                                                                                                                                                                                                                                                                                                                                                                                                                                                                                                                                                                                                                                                                                                                                                                                                                                                                               |  |                   |   |            |                                      |                         |                |                                     |           |            |                                       |  |            |                         |                   |  |                              |  |                        |                |                         |  |  |                              |  |                         |            |                         |  |  |                              |  |                         |  |              |   |            |           |                                      |                |          |  |            |         |  |

Abbreviations: See table 2



**Table 8: Ranibizumab safety data**

|                              | READ-2 study[28,47]                         | RESOLVE study[36]                                    | RESTORE study[24]                               | RISE study[38]                         | RIDE study[38]                         |
|------------------------------|---------------------------------------------|------------------------------------------------------|-------------------------------------------------|----------------------------------------|----------------------------------------|
| Number of patients           | IVR: n=42; L: n=42; IVRL: n=42              | IVR0.3: n=51; IVR0.5: n=51; C: n=49                  | IVR: n=116; IVRL: n=118; L: n=111               | IVR0.3: 125; IVR0.5: 126; C: 123       | IVR0.3: 125; IVR0.5: 124; C: 127       |
| <b>Ocular adverse events</b> |                                             |                                                      |                                                 |                                        |                                        |
| Eye pain                     | NR                                          | IVR0.3: n=9 (18%); IVR0.5: n=9 (18%); C: n=10 (20%)  | IVR: n=13 (11%); IVRL: n=10 (8%); L: n=12 (11%) | IVR0.3: 26%; IVR0.5: 21%; C: 19%       | IVR0.3: 8%; IVR0.5: 12.9%; C: 7.1%     |
| Conjunctival hyperaemia      | NR                                          | NR                                                   | IVR: n=9 (8%); IVRL: n=6 (5%); L: n=6 (5%)      | NR                                     | NR                                     |
| Conjunctival haemorrhage     | NR                                          | IVR0.3: n=10 (20%); IVR0.5: n=13 (25%); C: n=7 (14%) | IVR: n=8 (7%); IVRL: n=10 (8%); L: n=0          | IVR0.3: 54%; IVR0.5: 52%; C: 32%       | IVR0.3: 40.8%; IVR0.5: 50.0%; C: 31.5% |
| IOP increase                 | NR                                          | IVR0.3: n=6 (12%); IVR0.5: n=15 (29%); C: n=1 (2%)   | IVR: n=1 (<1%); IVRL: n=1 (<1%);                | IVR0.3: 20%; IVR0.5: 14%; C: 2%        | IVR0.3: 15.2%; IVR0.5: 18.5%; C: 11%   |
| Vitreous haemorrhage         | IVR: n=1 (2%); L: n=4 (10%); IVRL: n=3 (7%) | IVR0.3: n=1 (2%); IVR0.5: n=0; C: n=0                | NR                                              | IVR0.3: 3.2%; IVR0.5: 3.2%; C: 13%     | IVR0.3: 0.8%; IVR0.5: 2.4%; C: 15%     |
| Substantial worsening of DMO | L: n=1 (2%)                                 |                                                      | NR                                              | NR                                     | NR                                     |
| Retinal ischaemia            | NR                                          | IVR0.3: n=0; IVR0.5: n=1 (2%); C: n=0                | NR                                              | NR                                     | NR                                     |
| Retinal artery occlusion     | NR                                          | IVR0.3: n=0; IVR0.5: n=1 (2%); C: n=0                | NR                                              | NR                                     | NR                                     |
| Endophthalmitis              | NR                                          | IVR0.3: n=1 (2%); IVR0.5: n=1 (2%); C: n=0           | NR                                              | IVR0.3: 0.8%; IVR0.5: 0; C: 0          | IVR0.3 + IVR0.5: 1.2%; C: 0%           |
| Retinal detachment           | NR                                          | IVR0.3: n=0; IVR0.5: n=0; C: n=1 (2%)                | NR                                              | IVR0.3: 0.8%; IVR0.5: 0; C: 0.8%       | IVR0.3 + IVR0.5: 0.4%; C: 0%           |
| Neovascularisation           | NR                                          | NR                                                   | NR                                              | IVR0.3: 0; IVR0.5: 0; C: 0.8%          | IVR0.3: 0.8%; IVR0.5: 0.8%; C: 5.5%    |
| Traumatic cataract           | NR                                          | NR                                                   | NR                                              | IVR0.3: 0.8%; IVR0.5: 0.8%; C: 0       | IVR0.3 + IVR0.5: 0.4%; C: 0%           |
| Uveitis                      | NR                                          | NR                                                   | NR                                              | NR                                     | IVR0.3 + IVR0.5: 0.4%; C: 0%           |
| Macular oedema               | NR                                          | NR                                                   | NR                                              | IVR0.3: 16.8%; IVR0.5: 20.6%; C: 21.1% | IVR0.3: 19.2%; IVR0.5: 13.7%; C: 20.5% |
| Retinal exudates             | NR                                          | NR                                                   | NR                                              | IVR0.3: 19.2%; IVR0.5: 17.5%; C: 20.3% | IVR0.3: 16.0%; IVR0.5: 15.3%; C: 11.0% |
| Retinal haemorrhage          | NR                                          | NR                                                   | NR                                              | IVR0.3: 12.8%; IVR0.5: 12.7%; C: 20.3% | IVR0.3: 15.2%; IVR0.5: 22.6%; C: 18.9% |

1  
2  
3  
4  
5  
6  
7  
8  
9  
10  
11  
12  
13  
14  
15  
16  
17  
18  
19  
20  
21  
22  
23  
24  
25  
26  
27  
28  
29  
30  
31  
32  
33  
34  
35  
36  
37  
38  
39  
40  
41  
42  
43  
44  
45  
46  
47  
48  
49

|                                  |                                                              |                                                   |                                              |                                                                              |                                                                                                                               |
|----------------------------------|--------------------------------------------------------------|---------------------------------------------------|----------------------------------------------|------------------------------------------------------------------------------|-------------------------------------------------------------------------------------------------------------------------------|
| Cataract                         | NR                                                           | NR                                                | NR                                           | IVR0.3: 16.8%; IVR0.5: 11.9%; C: 14.6%                                       | IVR0.3: 20.0%; IVR0.5: 23.4%; C: 23.6%                                                                                        |
| Vitreous detachment              | NR                                                           | NR                                                | NR                                           | IVR0.3: 13.6%; IVR0.5: 11.1%; C: 15.4%                                       | IVR0.3: 8.8%; IVR0.5: 12.9%; C: 15.0%                                                                                         |
| Ocular hyperemia                 | NR                                                           | NR                                                | NR                                           | IVR0.3: 15.2%; IVR0.5: 11.1%; C: 10.6%                                       | IVR0.3: 3.2%; IVR0.5: 3.2%; C: 7.9%                                                                                           |
| Vitreous floaters                | NR                                                           | NR                                                | NR                                           | IVR0.3: 12.8%; IVR0.5: 14.3%; C: 5.7%                                        | IVR0.3: 7.2%; IVR0.5: 8.1%; C: 3.1%                                                                                           |
| Eye irritation                   | NR                                                           | NR                                                | NR                                           | IVR0.3: 10.4%; IVR0.5: 9.5%; C: 6.5%                                         | IVR0.3: 5.6%; IVR0.5: 5.6%; C: 3.1%                                                                                           |
| Foreign body sensation in eyes   | NR                                                           | NR                                                | NR                                           | IVR0.3: 12.8%; IVR0.5: 7.1%; C: 4.1%                                         | IVR0.3: 8.0%; IVR0.5: 2.4%; C: 5.5%                                                                                           |
| <b>Systematic adverse events</b> |                                                              |                                                   |                                              |                                                                              |                                                                                                                               |
| Arterial thromboembolic events   | Stroke in 1 pt (2%) in IVRL group- not related to study drug | IVR0.3: n=0; IVR0.5: n=3 (6%); C: n=2 (4%)        | IVR: n=6 (5%); IVRL: n=1 (<1%); L: n=1 (<1%) | IVR0.3: 3.2% (n=1 stroke); IVR0.5: 7.9% (n=5 strokes); C: 7.3% (n=2 strokes) | IVR0.3: 1.6% (stroke), 5.6% (heart attack); IVR0.5: 2.4% (stroke), 2.4% (heart attack); C: 1.6% (stroke), 5.6% (heart attack) |
| Hypertension                     | NR                                                           | IVR0.3: n=4 (8%); IVR0.5: n=5 (10%); C: n=5 (10%) | IVR: n=9 (8%); IVRL: n=6 (5%); L: n=9 (8%)   | Serious IVR0.3: 0.8%; IVR0.5: 3.2%; C: 0.8%                                  | Serious IVR0.3: 1.6%; IVR0.5: 1.6%; C: 0%                                                                                     |
| Non-ocular haemorrhage           | NR                                                           | IVR0.3: n=1 (2%); IVR0.5: n=1 (2%); C: n=0        | IVR: n=1 (<1%); IVRL: n=0; L: n=1 (<1%)      | NR                                                                           | NR                                                                                                                            |
| Proteinuria                      | NR                                                           | NR                                                | IVR: n=1 (<1%); IVRL: n=1 (<1%); L: n=0      | NR                                                                           | NR                                                                                                                            |
| Deaths                           | 1 (2%) due to CVA in IVRL group                              | NR                                                | IVR: n=2 (2%); IVRL: n=2 (2%); L: n=2 (2%)   | IVR0.3: 2.4%; IVR0.5: 4.0%; C: 0.8%                                          | IVR0.3: 3.2%; IVR0.5: 4.8%; C: 1.6%                                                                                           |

NR – not reported, IVR – intra-vitreous ranibizumab, IVRL – intra-vitreous ranibizumab plus laser, C – control, L – laser, IOP –intra-ocular pressure, DMO – diabetic macular oedema,

Table 9: Bevacizumab safety

|                                                        | <b>BOLT study[23,52]</b>                                       | <b>Lam 2009[35]</b>                                                                                                                                                   | <b>Faghihi 2010[53]</b>                                                                                                                                                    |
|--------------------------------------------------------|----------------------------------------------------------------|-----------------------------------------------------------------------------------------------------------------------------------------------------------------------|----------------------------------------------------------------------------------------------------------------------------------------------------------------------------|
| Number of patients                                     | MLT: n=38; IVB: n=42                                           | IVB1.25, n=26; IVB2.5, n=26                                                                                                                                           | IVB 1.25 n= 40 IVB 1.25 plus MLT n=40                                                                                                                                      |
| <b>Ocular adverse events</b>                           |                                                                |                                                                                                                                                                       | <b>Not reported</b>                                                                                                                                                        |
| Loss of _15 or _30 ETDRS letters                       | MLT: n=1 transient, 3 at 24 month analysis; IVB: n=4 transient | No significant ocular events (IOP increase, retinal tear, retinal detachment, endophthalmitis); no significant difference in change in cataract scores between groups |                                                                                                                                                                            |
| Vitreous haemorrhage                                   | MLT: n=1; IVB: n=0                                             |                                                                                                                                                                       |                                                                                                                                                                            |
| Eye pain/irritation/watering during or after injection | MLT:n= 0; IVB: n=8                                             |                                                                                                                                                                       |                                                                                                                                                                            |
| Red eye after injection                                | MLT: n=0; IVB: n=8                                             |                                                                                                                                                                       |                                                                                                                                                                            |
| Endophthalmitis                                        | NR                                                             |                                                                                                                                                                       |                                                                                                                                                                            |
| Transient IOP increase                                 | ≥30 mm Hg - MLT: 0; IVB: n=4 ≥ 45 mm Hg - MLT: n=1; IVB: n=1   |                                                                                                                                                                       |                                                                                                                                                                            |
| Floaters after injection                               | MLT: n= 0; IVB: n=2                                            |                                                                                                                                                                       |                                                                                                                                                                            |
| Corneal epithelial defect                              | MLT:n=0; IVB:n=1                                               |                                                                                                                                                                       |                                                                                                                                                                            |
| Vitreomacular traction with macular oedema             | MLT: n=1; IVB: n=0                                             |                                                                                                                                                                       |                                                                                                                                                                            |
| <b>Systematic adverse events</b>                       |                                                                |                                                                                                                                                                       | no systematic adverse effects (1 patient in 1.25 mg group with foot gangrene requiring amputation due to worsening diabetic neuropathy, considered unrelated to treatment) |
| Anaemia                                                | MLT: n=1; IVB: n=0                                             |                                                                                                                                                                       |                                                                                                                                                                            |
| Vomiting after FFA                                     | MLT: n=1; IVB: n=0                                             |                                                                                                                                                                       |                                                                                                                                                                            |
| Uncontrolled hypertension                              | MLT:n=0; IVB: n=1                                              |                                                                                                                                                                       |                                                                                                                                                                            |
| Polymyalgia rheumatica                                 | MLT:n=0; IVB: n=1                                              |                                                                                                                                                                       |                                                                                                                                                                            |
| Intermittent claudication                              | MLT:n=0; IVB: n=1                                              |                                                                                                                                                                       |                                                                                                                                                                            |
| Gastroenteritis                                        | MLT:n=0; IVB: n=1                                              |                                                                                                                                                                       |                                                                                                                                                                            |
| Fall                                                   | MLT:n=2; IVB: n=0                                              |                                                                                                                                                                       |                                                                                                                                                                            |
| Urinary tract infection                                | MLT:n=0; IVB: n=1                                              |                                                                                                                                                                       |                                                                                                                                                                            |
| Chest infection                                        | MLT:n=0; IVB: n=1                                              |                                                                                                                                                                       |                                                                                                                                                                            |
| Headaches, dizziness, tiredness                        | MLT:n=1; IVB: n=0                                              |                                                                                                                                                                       |                                                                                                                                                                            |
| Bell palsy                                             | MLT:n=1; IVB: n=0                                              |                                                                                                                                                                       |                                                                                                                                                                            |
| Admission for diabetic foot ulcer                      | MLT:n=1; IVB: n=1                                              |                                                                                                                                                                       |                                                                                                                                                                            |
| Admission for cholecystectomy                          | MLT:n=0; IVB: n=1                                              |                                                                                                                                                                       |                                                                                                                                                                            |
| Admission for fall/loss of consciousness               | MLT:n=1; IVB: n=0                                              |                                                                                                                                                                       |                                                                                                                                                                            |
| Angina-hospital admission                              | MLT:n=1; IVB: n=0                                              |                                                                                                                                                                       |                                                                                                                                                                            |
| Cerebrovascular accident                               | MLT:n=1; IVB: n=0                                              |                                                                                                                                                                       |                                                                                                                                                                            |
| Myocardial infarction                                  | MLT:n=0; IVB: n=2                                              |                                                                                                                                                                       |                                                                                                                                                                            |
| Coronary artery bypass graft                           | MLT:n=0; IVB: n=1                                              |                                                                                                                                                                       |                                                                                                                                                                            |
| Dyspnea, chest pain-admitted for hospital observation  | MLT:n=0; IVB: n=1                                              |                                                                                                                                                                       |                                                                                                                                                                            |

1  
2  
3  
4  
5  
6  
7  
8  
9  
10  
11  
12  
13  
14  
15  
16  
17  
18  
19  
20  
21  
22  
23  
24  
25  
26  
27  
28  
29  
30  
31  
32  
33  
34  
35  
36  
37  
38  
39  
40  
41  
42  
43  
44  
45  
46  
47  
48  
49

|       |    |  |  |
|-------|----|--|--|
| DEATH | NR |  |  |
|-------|----|--|--|

For peer review only

Table 10 Pegaptanib safety

|                                  | Cunningham 2005/Adamis 2006[39,57]                  | Sultan 2011[40]                |
|----------------------------------|-----------------------------------------------------|--------------------------------|
| Number of patients               | IVP0.3, n=44 eyes; IVP1, n=44 eyes; IVP3, n=42 eyes | IVP, n=133 eyes; C, n=127 eyes |
| <b>Ocular adverse events</b>     |                                                     |                                |
| Eye pain                         | Pegaptanib: 31%; C: 17%                             | IVP: 11.1%; C: 7.0%            |
| Vitreous haemorrhage             | Pegaptanib: 22%; C: 7%                              | IVP: 6.3%; C: 7.7%             |
| Punctuate keratitis              | Pegaptanib: 18%; C: 17%                             | IVP: 11.8%; C: 6.3%            |
| Cataract                         | Pegaptanib: 13%; C: 10%                             | IVP: 8.3%; C: 9.2%             |
| Eye discharge                    | Pegaptanib: 11%; C: 10%                             | NR                             |
| Conjunctival haemorrhage         | Pegaptanib: 10%; C: 0%                              | IVP: 22.2%; C: 14.1%           |
| Vitreous opacities               | Pegaptanib: 9%; C: 5%                               | NR                             |
| Blurred vision                   | Pegaptanib: 7%; C: 5%                               | NR                             |
| Other vitreous disorder          | Pegaptanib: 7%; C: 0%                               | NR                             |
| Other visual disturbance         | Pegaptanib: 7%; C: 0%                               | NR                             |
| Culture-negative endophthalmitis | Pegaptanib: n=1                                     | NR                             |
| IOP increase                     | NR                                                  | IVP: 17.4%; C: 6.3%            |
| Retinal haemorrhage              | NR                                                  | IVP: 6.3%; C: 10.6%            |
| Retinal exudates                 | NR                                                  | IVP: 6.3%; C: 5.6%             |
| Conjunctivitis                   | NR                                                  | IVP: 5.6%; C: 4.2%             |
| Lacrimation increased            | NR                                                  | IVP: 5.6%; C: 2.8%             |
| Diabetic retinal oedema          | NR                                                  | IVP: 11.1%; C: 17.6%           |
| Macular oedema                   | NR                                                  | IVP: 9.7%; C: 11.6%            |
| <b>Systemic adverse events</b>   |                                                     |                                |
| Non-ocular hypertension          | NR                                                  | IVP: 13.9%; C: 9.9%            |
| Cardiac disorders                | NR                                                  | IVP: 6.9%; C: 5.6%             |
| <b>DEATHS</b>                    | NR                                                  | IVP: n=4                       |

1  
2  
3  
4  
5  
6  
7  
8  
9  
10  
11  
12  
13  
14  
15  
16  
17  
18  
19  
20  
21  
22  
23  
24  
25  
26  
27  
28  
29  
30  
31  
32  
33  
34  
35  
36  
37  
38  
39  
40  
41  
42  
43  
44  
45  
46  
47  
48  
49

**Table 11: aflibercept safety**

|                              | <b>DA VINCI 2010[30,58]</b>                                                     |
|------------------------------|---------------------------------------------------------------------------------|
| Number of patients           | IVVTE (all doses) n=175, laser n = 44                                           |
| <b>Ocular adverse events</b> |                                                                                 |
| Conjunctival hemorrhage      | At 6 months: Laser 18.2%, IVVTE 18.9%<br>At 12 months: Laser 18.2%, IVVTE 26.9% |
| IOP increase                 | At 6 months: Laser 2.3%, IVVTE 9.7%<br>At 12 months: Laser 2.3%, IVVTE 9.7%     |
| Eye pain                     | At 6 months: Laser 4.5%, IVVTE 8.6%<br>At 12 months: Laser 4.5%, IVVTE 13.7%    |
| Ocular hyperaemia            | At 6 months: Laser 4.5%, IVVTE 6.3%<br>At 12 months: Laser 4.5%, IVVTE 7.4%     |
| Vitreous floaters            | At 6 months: Laser 4.5%, IVVTE 5.1%<br>At 12 months: Laser 4.5%, IVVTE 6.9%     |
| Endophthalmitis              | At 6 months: Laser 0%, IVVTE 1.1%<br>At 12 months: Laser 0%, IVVTE 1.1%         |
| Uveitis                      | At 6 months: Laser 0%, IVVTE 0.6%<br>At 12 months: Laser 0%, IVVTE 0.6%         |
| Diabetic retinal oedema      | At 6 months: Laser 2.3%, IVVTE 0%<br>At 12 months: Laser 2.3%, IVVTE 4.6%       |
| Visual acuity reduced        | At 6 months: Laser 2.3%, IVVTE 0%<br>At 12 months: Laser 2.3%, IVVTE 0%         |
| Vitreous hemorrhage          | At 6 months: Laser 2.3%, IVVTE 0%<br>At 12 months: Laser 6.8%, IVVTE 0%         |
| Corneal abrasion             | At 6 months: Laser 0%, IVVTE 0.6%<br>At 12 months: Laser 0%, IVVTE 4.6%         |
| Retinal tear                 | At 6 months: Laser 0%, IVVTE 0.6%<br>At 12 months: NR                           |
| <b>Systematic events</b>     |                                                                                 |
| Hypertension                 | At 6 months: Laser 6.8%, IVVTE 9.7%<br>At 12 months: Laser 0%, IVVTE 1.7%       |
| Myocardial infarction        | At 6 months: Laser 0%, IVVTE 1.1%<br>At 12 months: Laser 0%, IVVTE 1.7%         |
| Cerebrovascular event        | At 6 months: Laser 0%, IVVTE 1.1%<br>At 12 months: Laser 2.3%, IVVTE 1.7%       |
| Death                        | At 6 months: Laser 0%, IVVTE 1.7%<br>At 12 months: Laser 2.3%, IVVTE 4.0%       |

Table 12: Dexamethasone safety

|                              | Callanan 2011[44]                                          | Haller 2010[59]                                                                                                                                              |
|------------------------------|------------------------------------------------------------|--------------------------------------------------------------------------------------------------------------------------------------------------------------|
| Number of patients           |                                                            |                                                                                                                                                              |
| <b>Ocular adverse events</b> |                                                            |                                                                                                                                                              |
| IOP elevation                | DIL: 20% (p<0.001); 1% ≥10 mm Hg<br>L: 1.6% ; 0% ≥10 mm Hg |                                                                                                                                                              |
| Cataract                     | NR                                                         | NR                                                                                                                                                           |
| Anterior chamber cells       | NR                                                         | DDS350: 29.1%; DDS700: 26.4%; C: 1.8%                                                                                                                        |
| Anterior chamber flare       | NR                                                         | DDS350: 27.3%; DDS700: 20.8%; C: 8.8%                                                                                                                        |
| Vitreous haemorrhage         | NR                                                         | DDS350: 20.0%; DDS700: 22.6%; C: 5.3%                                                                                                                        |
| Eye pain                     | NR                                                         | DDS350: 18.2%; DDS700: 9.4%; C: 3.5%                                                                                                                         |
| Vitreous disorder            | NR                                                         | DDS350: 20.0%; DDS700: 15.1%; C: 3.5%                                                                                                                        |
| Increased IOP                | NR                                                         | DDS350: 14.5%; DDS700: 9.4%; C: 0%                                                                                                                           |
| Conjunctival haemorrhage     | NR                                                         | DDS350: 14.5%; DDS700: 7.5%; C: 0%                                                                                                                           |
| Vitreous floaters            | NR                                                         | DDS350: 7.3%; DDS700: 17.0%; C: 0%                                                                                                                           |
|                              |                                                            | No significant differences in: reduced VA, eye irritation, abnormal sensation in eye, macular oedema, eye pruritus, retinal hemorrhage, DR, nonocular events |



Table 13 Fluocinolone safety

|                                            | FAME study (Campochiaro 2011/2012)[29,60]                                                                                                                                                                                                                           | Pearson 2011[43]        |
|--------------------------------------------|---------------------------------------------------------------------------------------------------------------------------------------------------------------------------------------------------------------------------------------------------------------------|-------------------------|
| Number of patients                         |                                                                                                                                                                                                                                                                     |                         |
| <b>Ocular adverse events</b>               |                                                                                                                                                                                                                                                                     |                         |
| IOP at 12 months                           | NR                                                                                                                                                                                                                                                                  | NR                      |
| Progression of cataract                    | NR                                                                                                                                                                                                                                                                  | NR                      |
| Cataract                                   | NR                                                                                                                                                                                                                                                                  | SRFA: 55.9%; SOC: 21.7% |
| Transient vitreous floaters                | NR                                                                                                                                                                                                                                                                  | NR                      |
| Transient subconjunctival haemorrhage      | NR                                                                                                                                                                                                                                                                  | NR                      |
| Cataract surgery                           | SRFA0.2: 41.1% (74.9% of those without cataract surgery at baseline, 80.0% at 36 months); SRFA0.5: 50.9% (84.5% of those without cataract surgery at baseline, 87.2% at 36 months); C: 7% (23.1% of those without cataract surgery at baseline, 27.3% at 36 months) | NR                      |
| Glaucoma                                   | SRFA0.2: 1.6%; SRFA0.5: 2.3%; C: 0.5%                                                                                                                                                                                                                               | NR                      |
| Increased IOP                              | SRFA0.2: 3.2%; SRFA0.5: 3.3%; C: 0%                                                                                                                                                                                                                                 | SRFA: 69.3%; SOC: 11.6% |
| IOP >30 mmHg at any point during 36 months | SRFA0.2: 18.4%; SRFA0.5: 22.9%; C: 4.3%                                                                                                                                                                                                                             | NR                      |
| Trabeculectomy                             | SRFA0.2: 2.1%; SRFA0.5: 4.8%; C: 0%                                                                                                                                                                                                                                 | NR                      |
| Other glaucoma surgery                     | SRFA0.2: 1.3%; SRFA0.5: 1.3%; C: 0.5%                                                                                                                                                                                                                               | NR                      |
| Trabeculectomy                             | SRFA0.2: 0.8%; SRFA0.5: 2.3%; C: 0%                                                                                                                                                                                                                                 | NR                      |
| Vitreous haemorrhage                       | NR                                                                                                                                                                                                                                                                  | SRFA: 40.2%; SOC: 18.8% |
| Abnormal sensation in eye                  | NR                                                                                                                                                                                                                                                                  | SRFA: 37%; SOC: 11.6%   |
| Macular oedema                             | NR                                                                                                                                                                                                                                                                  | SRFA: 34.6%             |
| Eye pain                                   | NR                                                                                                                                                                                                                                                                  | SRFA: 26.8%; SOC: 15.9% |
| Eye irritation                             | NR                                                                                                                                                                                                                                                                  | SRFA: 22%; SOC: 10.1%   |
| Increased lacrimation                      | NR                                                                                                                                                                                                                                                                  | SRFA: 22%; SOC: 8.7%    |
| Photophobia                                | NR                                                                                                                                                                                                                                                                  | SRFA: 21.3%; SOC: 21.7% |
| Blurred vision                             | NR                                                                                                                                                                                                                                                                  | SRFA: 21.3%; SOC: 15.9% |
| Vitreous floaters                          | NR                                                                                                                                                                                                                                                                  | SRFA: 21.3%; SOC: 8.7%  |
| <b>Systemic adverse events</b>             |                                                                                                                                                                                                                                                                     |                         |
| Serious cardiovascular events              | SRFA0.2: 12.0%; SRFA0.5: 13.2%; C: 10.3%                                                                                                                                                                                                                            |                         |
| Pruritus                                   | NR                                                                                                                                                                                                                                                                  | SRFA: 38.6%; SOC: 21.7% |
| DEATHS                                     | NR                                                                                                                                                                                                                                                                  | NR                      |

Table 14: Triamcinolone safety

|                                    | DRCR Network 2008 (Ip 2008a / Ip 2008b / Beck 2009 / Bressler 2009) [22,61,63,64]                                                                                                                  | Gillies 2006 / 2007 / 2009 / Sutter 2004[32,137-139]                                       | Gillies 2011[33]            | Kim 2010[45] | Lam 2007[34]                                               | Ockrim 2008 / Sivaprasad 2008[42,62]                                                                   |
|------------------------------------|----------------------------------------------------------------------------------------------------------------------------------------------------------------------------------------------------|--------------------------------------------------------------------------------------------|-----------------------------|--------------|------------------------------------------------------------|--------------------------------------------------------------------------------------------------------|
| Number of patients                 |                                                                                                                                                                                                    |                                                                                            |                             |              |                                                            |                                                                                                        |
| <b>Ocular adverse events</b>       |                                                                                                                                                                                                    |                                                                                            |                             |              |                                                            |                                                                                                        |
|                                    | At 2 years (or 3 years when indicated)                                                                                                                                                             | At 2 years                                                                                 | -                           | Not reported | -                                                          | At 12 months                                                                                           |
| IOP $\geq$ 30 mm Hg                | IVT1: n=22; IVT4: n=53; L: n=3                                                                                                                                                                     | NR                                                                                         | NR                          |              | NR                                                         | IVT: IOP significantly higher than in L group (18.2 mm Hg, range 12 to 26 mm Hg); no cases of glaucoma |
| IOP >22 mm Hg                      | NR                                                                                                                                                                                                 | NR                                                                                         | NR                          |              | IVT: 37% (p=0.002 vs. L); IVTL: 36% (p=0.002 vs. L); L: 5% | NR                                                                                                     |
| IOP $\geq$ 10 mm Hg from baseline  | IVT1: n=41; IVT4: n=85; L: n=12                                                                                                                                                                    | NR                                                                                         | NR                          |              | NR                                                         | NR                                                                                                     |
| IOP $\geq$ 5 mm Hg                 | NR                                                                                                                                                                                                 | IVT: 68% (p=0.007 vs. C); C: 10%                                                           | NR                          |              | NR                                                         | NR                                                                                                     |
| IOP lowering medication used       | IVT1: n=31; IVT4: n=76; L: n=25                                                                                                                                                                    | IVT: 44% (p=0.0002 vs. C); C: 3%                                                           | IVTL: 64% (P<0.001); L: 24% |              | NR                                                         | NR                                                                                                     |
| Cataract surgery                   | IVT1: 23% (of those phakic at baseline, 46% by 3 years (p<0.001 between all groups); IVT4: 51% (of those phakic at baseline, 83% by 3 years); L: 13% (of those phakic at baseline, 31% by 3 years) | IVT: 56% (of phakic eyes over 3 years, p<0.001 vs. C); C: 8% (of phakic eyes over 3 years) |                             |              | NR                                                         | NR                                                                                                     |
| Ptosis                             | NR                                                                                                                                                                                                 | NR                                                                                         | NR                          |              | NR                                                         | NR                                                                                                     |
| Retinal detachment                 | IVT1: n=2; IVT4: n=4; L: n=2                                                                                                                                                                       | NR                                                                                         | NR                          |              | None                                                       | NR                                                                                                     |
| Retinal vein occlusion             | IVT1: n=1; IVT4: n=2; L: n=3                                                                                                                                                                       | NR                                                                                         | NR                          |              | NR                                                         | NR                                                                                                     |
| Retinal artery occlusion           | IVT1: n=0; IVT4: n=0; L: n=1                                                                                                                                                                       | NR                                                                                         | NR                          |              | NR                                                         | NR                                                                                                     |
| Anterior ischemic optic neuropathy | IVT1: n=1; IVT4: n=0; L: n=0                                                                                                                                                                       | NR                                                                                         | NR                          |              | NR                                                         | NR                                                                                                     |
| Vitrectomy                         | IVT1: n=26; IVT4: n=19; L: n=31                                                                                                                                                                    | NR                                                                                         | NR                          |              | NR                                                         | NR                                                                                                     |
| Open angle glaucoma                | IVT1: n=2; IVT4: n=7; L: n=2                                                                                                                                                                       | NR                                                                                         | NR                          |              | NR                                                         | NR                                                                                                     |

1  
2  
3  
4  
5  
6  
7  
8  
9  
10  
11  
12  
13  
14  
15  
16  
17  
18  
19  
20  
21  
22  
23  
24  
25  
26  
27  
28  
29  
30  
31  
32  
33  
34  
35  
36  
37  
38  
39  
40  
41  
42  
43  
44  
45  
46  
47  
48  
49

|                                 |                                    |                              |                                                                                   |                                                                            |                                                                                 |
|---------------------------------|------------------------------------|------------------------------|-----------------------------------------------------------------------------------|----------------------------------------------------------------------------|---------------------------------------------------------------------------------|
| Glaucoma filtering surgery      | IVT1: n=0; IVT4: n=2; L: n=0       | NR                           | NR                                                                                | NR                                                                         | NR                                                                              |
| Laser trabeculoplasty           | IVT1: n=0; IVT4: n=1; L: n=0       | IVT: n=2; C: n=0             | IVTL: n=1                                                                         | NR                                                                         | NR                                                                              |
| Ciliary body destruction        | IVT1: n=0; IVT4: n=1; L: n=0       | NR                           | NR                                                                                | NR                                                                         | NR                                                                              |
| Endophthalmitis                 | IVT1: n=0; IVT4: n=0; L: n=0       | (Infectious) IVT: n=1; C: NR | (Culture-negative) IVTL: n=1                                                      | None                                                                       | (sterile) IVT: n=1                                                              |
| pseudoendophthalmitis           | IVT1: n=0; IVT4: n=0; L: n=0       | NR                           | NR                                                                                | NR                                                                         | NR                                                                              |
| Chemosis                        | NR                                 | NR                           | NR                                                                                | NR                                                                         | NR                                                                              |
| % increase in cataract scores   | NR                                 | NR                           | NR                                                                                | IVT: +1.0 SD1.1 (p=NS vs. L); IVTL: +1.3 SD1.9 (p=NS vs. L); L: +0.5 SD0.9 | NR                                                                              |
| Ocular hypertension (>21 mm Hg) | NR                                 | NR                           | NR                                                                                | NR                                                                         | NR                                                                              |
| Cataract progression            | NR                                 | NR                           | Phakic eyes, progression by ≥2 AREDS grade, IVTL: 64% (p<0.001); L: 11% (p<0.001) | NR                                                                         | NR                                                                              |
| Corneal decompensation          | NR                                 | IVT: NR; C: n=1              | NR                                                                                | NR                                                                         | NR                                                                              |
| Cataract surgery                | NR                                 | NR                           | IVTL: 61% (p<0.001); L: 0%                                                        | NR                                                                         | IVT: n=2; L: n=1                                                                |
| Vitreous haemorrhage            | NR                                 | NR                           | NR                                                                                | IVTL: n=1                                                                  |                                                                                 |
| Lens opacity                    | NR                                 | NR                           | NR                                                                                | NR                                                                         | Significantly greater change in lens opacity in IVT group than in L group (1.9) |
| <b>DEATHS</b>                   | N=33, unrelated to study treatment | IVT: n=1; C: n=2             | IVTL: n=2; L: n=1                                                                 | NR                                                                         | NR                                                                              |

Table 15 Safety data in trials assessing more than one drug

|                                                   | Ahmadieh 2008[31]                                                                                                                  | ATEMD 2011 (Oliveira Neto 2011) [56] | DRCR Network 2010 (Elman 2010, Elman 2011)[21,46]   | Lim 2012[55]                | Soheilian 2007 / Soheilian 2009[37,41]                                                      |
|---------------------------------------------------|------------------------------------------------------------------------------------------------------------------------------------|--------------------------------------|-----------------------------------------------------|-----------------------------|---------------------------------------------------------------------------------------------|
| Number of patients                                |                                                                                                                                    |                                      |                                                     |                             |                                                                                             |
|                                                   | <b>Ocular adverse events</b>                                                                                                       |                                      |                                                     |                             |                                                                                             |
| Mild anterior chamber reaction                    | IVB: 19.5% (n=8 eyes), resolved after one week of no treatment; IVB/IVT: 18.9% (n=7 eyes), resolved after one week of no treatment | NR                                   | NR                                                  | NR                          | IVB: 20% (n=10 eyes), resolved after 1 week; IVB/IVT: 18% (n=9 eyes), resolved after 1 week |
| Marked anterior chamber reaction                  | IVB: n=1 (topical corticosteroid and cycloplegic drops)                                                                            | NR                                   | NR                                                  | NR                          | IVB: n=1 (topical corticosteroids and cycloplegic drops);                                   |
| Progression of fibrous proliferation              | IVB: n=1 with no sign of retinal traction                                                                                          | NR                                   | NR                                                  | NR                          | IVB: n=1 with no sign of retinal traction;                                                  |
| Vitreous haemorrhage                              | IVB/IVT: n=1 after third injection (excluded from study)                                                                           | NR                                   | NR                                                  | NR                          | NR                                                                                          |
| IOP rise                                          | IVB: 23, 22 and 28 mm Hg at 6, 12 and 18 weeks (anti-glaucoma drops)                                                               | NR                                   | IOP elevation more frequent with triamcinolone + PL | IVB/IVT: 8.3%<br>IVT: 10.8% | NR                                                                                          |
| IOP $\geq$ 10 mm Hg from baseline                 | NR                                                                                                                                 | NR                                   | CPL: n=16; RPL: n=10; RDL: n=5; TPL: n=70           | NR                          | NR                                                                                          |
| IOP $\geq$ 30 mm Hg from baseline                 | NR                                                                                                                                 | NR                                   | CPL: n=3; RPL: n=2; RDL: n=4; TPL: n=46             | NR                          | NR                                                                                          |
| Initiation of IOP lowering treatment at any visit | NR                                                                                                                                 | NR                                   | CPL: n=9; RPL: n=5; RDL: n=4; TPL: n=41             | NR                          | NR                                                                                          |
| Iris neovascularization                           | None                                                                                                                               | NR                                   | NR                                                  | NR                          | NR                                                                                          |
| Lens opacity                                      | None                                                                                                                               | NR                                   | NR                                                  | NR                          | Severe lens opacity<br>IVB/IVT: n=4 eyes; MPC: n=1 eye                                      |
| Endophthalmitis                                   | NR                                                                                                                                 | NR                                   | CPL: n=1; RPL: n=1; RDL: n=1; TPL: n=0              | NR                          | None                                                                                        |
| Pseudoendophthalmitis                             | NR                                                                                                                                 | NR                                   | CPL: n=1; RPL: n=0; RDL: n=0; TPL: n=1              | NR                          | NR                                                                                          |
| Ocular vascular event                             | NR                                                                                                                                 | NR                                   | CPL: n=1; RPL: n=1; RDL: n=0; TPL: n=2              | NR                          | NR                                                                                          |

|                                        |        |                                                     |                                                                                                                                                                  |    |                                                                                                          |
|----------------------------------------|--------|-----------------------------------------------------|------------------------------------------------------------------------------------------------------------------------------------------------------------------|----|----------------------------------------------------------------------------------------------------------|
| Retinal detachment                     | NR     | NR                                                  | CPL: n=0; RPL: n=0; RDL: n=1; TPL: n=0                                                                                                                           | NR | None                                                                                                     |
| Vitrectomy                             | NR     | NR                                                  | CPL: n=7; RPL: n=0; RDL: n=3; TPL: n=0                                                                                                                           | NR | NR                                                                                                       |
| Vitreous haemorrhage                   | NR     | NR                                                  | CPL: n=15; RPL: n=3; RDL: n=4; TPL: n=2                                                                                                                          | NR | None                                                                                                     |
| Cataract surgery                       | NR     | NR                                                  | CPL: n=11 (of those phakic at baseline); RPL: n=6 (of those phakic at baseline); RDL: n=8 (of those phakic at baseline); TPL: n=19 (of those phakic at baseline) | NR | NR                                                                                                       |
| Glaucoma surgery                       | NR     | NR                                                  | NR                                                                                                                                                               | NR | NR                                                                                                       |
| Retinal neovascularization             | NR     | NR                                                  | NR                                                                                                                                                               | NR | IVB: n=4 (all resolved); MPC: n=3 eyes (2 resolved)                                                      |
| Development of early PDR               | NR     | NR                                                  | NR                                                                                                                                                               | NR | IVB: n=1; IVB/IVT: n=4; MPC: n=3                                                                         |
| Progression to high-risk PDR           | NR     | NR                                                  | NR                                                                                                                                                               | NR | IVB: n=4; IVB/IVT: n=3; MP: n=3                                                                          |
| Ocular hypertension ( $\geq 23$ mm HG) | NR     | NR                                                  | NR                                                                                                                                                               | NR | IVB/IVT: 16% (n=8 of eyes), controlled medically in all except 1 that progressed to neovascular glaucoma |
| <b>Systemic adverse events</b>         |        |                                                     |                                                                                                                                                                  |    |                                                                                                          |
| Acute myocardial infarction            |        | N=1, considered not to be related to the study drug | No specific systemic adverse events that could be attributed to chance                                                                                           |    | No significant blood pressure increase, no thromboembolic events                                         |
| Deaths                                 | C: n=1 | N=1, considered not to be related to the study drug | CPL: n=8; RPL: n=5; RDL: n=3; TPL: n=2                                                                                                                           |    | IVB/IVT: n=2; MPC: n=2                                                                                   |

NR – not reported, IVB – intra-vitreous bevacizumab, IVT- intravitreal triamcinolone, IVR – intra-vitreous ranibizumab, IVRL – intra-vitreous ranibizumab plus laser, C – control, L – laser, IOP – intra-ocular pressure, PDR – proliferative diabetic retinopathy, DMO – diabetic macular oedema,

Table 16: Study quality

| Study (author and year)              | Adequate sequence generation | Allocation concealment | Masking                                                                   | Incomplete outcome data addressed                                              | Free of selective reporting | Free of other bias (e.g. similarity at baseline, power assessment)                                                                                                       | Funder                                                              |
|--------------------------------------|------------------------------|------------------------|---------------------------------------------------------------------------|--------------------------------------------------------------------------------|-----------------------------|--------------------------------------------------------------------------------------------------------------------------------------------------------------------------|---------------------------------------------------------------------|
| <b>Anti-VEGFs</b>                    |                              |                        |                                                                           |                                                                                |                             |                                                                                                                                                                          |                                                                     |
| <b>Ranibizumab</b>                   |                              |                        |                                                                           |                                                                                |                             |                                                                                                                                                                          |                                                                     |
| READ-2 Study [28,47]                 | Unclear                      | Unclear                | Unclear                                                                   | Yes (91.3% completion)                                                         | Yes                         | Comparison groups similar at baseline; power analysis not mentioned                                                                                                      | Juvenile Diabetes Research Foundation, Genentech Inc.               |
| RESOLVE Study (Massin 2010)[36]      | Yes                          | Yes                    | Yes (patients and outcome assessors)                                      | Yes (82% completion in sham arm, 90.2% with ranibizumab)                       | Yes                         | Comparison groups similar at baseline; power analysis unclear                                                                                                            | Novartis Pharma, Switzerland                                        |
| RESTORE Study (Mitchell 2011)[24]    | Yes                          | Unclear                | Yes (patients, outcome assessors)                                         | Yes (87.3 to 88.3% completion)                                                 | Yes                         | Comparison groups similar at baseline; power analysis carried out (power adequate for VA changes)                                                                        | Novartis Pharma, Switzerland                                        |
| RISE and RIDE (Nguyen 2012)[38]      | Yes                          | Yes                    | Yes (patients, treating physician masked to assigned dose of ranibizumab) | Yes (2 year study completed by 83.3% of patients in RISE and by 84.6% in RIDE) | Yes                         | Comparison groups similar at baseline; ITT analysis; power analysis carried out (power adequate for primary endpoint)                                                    | Genentech Inc.                                                      |
| <b>Bevacizumab</b>                   |                              |                        |                                                                           |                                                                                |                             |                                                                                                                                                                          |                                                                     |
| BOLT Study (Michaelides 2010)[23,52] | Yes                          | Unclear                | Partial (outcome assessors, not patients)                                 | Yes (97.5% completion)                                                         | Yes                         | Comparison groups similar at baseline (except laser group had longer duration of clinically significant DMO); power analysis carried out (power adequate for VA changes) | Moorfields Special Trustees, National Institute for Health Research |
| Faghihi 2010[53]                     | Yes                          | Unclear                | Yes (patient)                                                             | Yes (100% completion)                                                          | Yes                         | Comparable groups at baseline                                                                                                                                            | Not specified                                                       |

| Study (author and year)              | Adequate sequence generation                 | Allocation concealment | Masking                                                         | Incomplete outcome data addressed | Free of selective reporting | Free of other bias (e.g. similarity at baseline, power assessment)                                                          | Funder                                                                          |
|--------------------------------------|----------------------------------------------|------------------------|-----------------------------------------------------------------|-----------------------------------|-----------------------------|-----------------------------------------------------------------------------------------------------------------------------|---------------------------------------------------------------------------------|
| Lam 2009[35]                         | Yes                                          | Yes                    | Yes (patients and technicians assessing BCVA, OCT and IOP)      | Yes (92.3% follow-up at 6 months) | Yes                         | Comparison groups similar at baseline; power analysis carried out (power adequate for CMT changes)                          | supported in part by the Action for Vision Eye Foundation Hong Kong (charity)   |
| <b>Pegaptanib</b>                    |                                              |                        |                                                                 |                                   |                             |                                                                                                                             |                                                                                 |
| Cunningham 2005 / Adamis 2006[39,57] | Yes                                          | Unclear                | Yes (patients and outcome assessors)                            | Yes (95% completion)              | Yes                         | Comparison groups similar at baseline; acknowledge lack of power to detect differences between doses of pegaptanib          | Eyetech Pharmaceuticals Inc., New York, and Pfizer Inc., New York               |
| Sultan 2011[40]                      | Yes                                          | Unclear                | Yes (patients and outcome assessors)                            | Yes (69.9 to 73.8% completion)    | Yes                         | Comparison groups similar at baseline; power analysis carried out (power adequate for VA changes)                           | Pfizer Inc., New York                                                           |
| <b>Aflibercept</b>                   |                                              |                        |                                                                 |                                   |                             |                                                                                                                             |                                                                                 |
| Da Vinci 2010 [30,58]                | Unclear (predetermined randomization scheme) | Unclear                | Yes (patients)                                                  | Yes (85% completion)              | Yes                         | Comparison groups similar at baseline, power calculation completed                                                          | Regeneron Pharmaceuticals, Inc., New York                                       |
| <b>Steroids</b>                      |                                              |                        |                                                                 |                                   |                             |                                                                                                                             |                                                                                 |
| <b>Dexamethasone</b>                 |                                              |                        |                                                                 |                                   |                             |                                                                                                                             |                                                                                 |
| Haller 2010[59]                      | Yes                                          | Unclear                | Yes (patients to dexamethasone dose, outcome assessors)         | Yes (92% completion)              | Yes                         | Comparison groups similar at baseline; power analysis carried out, but study not powered to detect differences in subgroups | Oculex Pharmaceuticals Inc.                                                     |
| <b>Fluocinolone</b>                  |                                              |                        |                                                                 |                                   |                             |                                                                                                                             |                                                                                 |
| FAME Study (Campochiaro 2011)[29,60] | Unclear                                      | Unclear                | Partial (patients, masking of outcome assessment not mentioned) | Yes (drop-out rate 19.0 to 22.7%) | Yes                         | Comparison groups similar at baseline; power analysis not mentioned                                                         | Alimera Sciences Inc., Atlanta, Georgia; Psivida Inc., Watertown, Massachusetts |



| Study (author and year)                              | Adequate sequence generation | Allocation concealment | Masking                                                                                                                              | Incomplete outcome data addressed              | Free of selective reporting | Free of other bias (e.g. similarity at baseline, power assessment)                                                               | Funder                                                                                                                                                                                          |
|------------------------------------------------------|------------------------------|------------------------|--------------------------------------------------------------------------------------------------------------------------------------|------------------------------------------------|-----------------------------|----------------------------------------------------------------------------------------------------------------------------------|-------------------------------------------------------------------------------------------------------------------------------------------------------------------------------------------------|
| Pearson 2011[43]                                     | Yes                          | Unclear                | Third party masked design (patient and investigator not masked)                                                                      | No losses to follow-up                         | Yes                         | Demographic characteristics were similar between implant and SOC groups; power calculation done, study adequately powered.       | Bausch & Lomb Inc, Rochester, New York                                                                                                                                                          |
| <b><i>Triamcinolone</i></b>                          |                              |                        |                                                                                                                                      |                                                |                             |                                                                                                                                  |                                                                                                                                                                                                 |
| DRCR Network 2008 [22,61,63,64]                      | Yes                          | Unclear                | Partial (patients to triamcinolone dose, outcome assessors not formally masked but generally not aware of participant's study group) | Yes (81 to 86% completion)                     | Yes                         | Comparison groups similar at baseline; power analysis carried out (power adequate for VA changes)                                | Cooperative agreement from the National Eye Institute, National Institute of Diabetes and Digestive and Kidney Diseases, National Institutes of Health, Department of Health and Human Services |
| Gillies 2006 / 2007 / 2009 / Sutter 2004[32,137-139] | Yes                          | Yes                    | Yes (patients, outcome assessors)                                                                                                    | Yes (91% completion intervention, 83% control) | Yes                         | Comparison groups similar at baseline (but limited demographic data); power analysis carried out (power adequate for VA changes) | Sydney Eye Hospital Foundation and Juvenile Diabetes Research Foundation, New York                                                                                                              |
| Gillies 2011[33]                                     | Yes                          | Yes                    | Yes (patients, outcome assessors)                                                                                                    | Yes (84.5% completion)                         | Yes                         | power analysis carried out (power adequate for VA changes)                                                                       | National Health and Medical Research Council, Canberra, Australia, and the Sydney Eye Hospital Foundation, Sydney, Australia                                                                    |
| Lam 2007[34]                                         | Yes                          | Yes                    | Partial (outcome assessors)                                                                                                          | No losses to follow-up                         | Yes                         | Comparison groups similar at baseline; power analysis carried out (power adequate for CMT changes)                               | Action for Vision Foundation, Hong Kong                                                                                                                                                         |
| Ockrim 2008/Sviprasad 2008[42,62]                    | Yes                          | Unclear                | Unclear                                                                                                                              | Yes (94% completion)                           | Yes                         | Comparison groups similar at baseline; power analysis carried out (power adequate for VA changes)                                | Special Trustees of Moorfields Eye Hospital                                                                                                                                                     |
| <b>Active comparator trials</b>                      |                              |                        |                                                                                                                                      |                                                |                             |                                                                                                                                  |                                                                                                                                                                                                 |

| Study (author and year) | Adequate sequence generation | Allocation concealment | Masking                                                                                                   | Incomplete outcome data addressed          | Free of selective reporting | Free of other bias (e.g. similarity at baseline, power assessment)                                                                                                      | Funder                                                                                                                                                                                                                                                                                                                         |
|-------------------------|------------------------------|------------------------|-----------------------------------------------------------------------------------------------------------|--------------------------------------------|-----------------------------|-------------------------------------------------------------------------------------------------------------------------------------------------------------------------|--------------------------------------------------------------------------------------------------------------------------------------------------------------------------------------------------------------------------------------------------------------------------------------------------------------------------------|
| Ahmadiéh 2008[31]       | Yes                          | Yes                    | Yes (patients and outcome assessors)                                                                      | Unclear                                    | Yes                         | CMT lower in control group at baseline ( $p < 0.05$ ), other baseline values similar; power analysis carried out (power adequate for CMT changes)                       | Not reported                                                                                                                                                                                                                                                                                                                   |
| DRCR Network [21,46]    | Yes                          | Unclear                | Yes (patients, except deferred laser group; outcome assessors); masking discontinued after the first year | Yes (1 year completion for 91-95% of eyes) | Yes                         | Comparison groups similar at baseline; power analysis carried out (power adequate for VA changes)                                                                       | Cooperative agreement from the National Eye Institute, National Institute of Diabetes and Digestive and Kidney Diseases, National Institutes of Health and Human Services; Ranibizumab provided by Genentech, triamcinolone provided by Allergan Inc.; companies also provided funds to defray the study's clinical site costs |
| Lim 2012[55]            | Yes                          | Unclear                | Yes (investigators only)                                                                                  | Yes (7.5% drop out after enrollment)       | Yes                         | Groups similar at baseline. The bevacizumab group received more injections.                                                                                             | Not reported                                                                                                                                                                                                                                                                                                                   |
| Soheilian [37,41]       | Yes                          | Yes                    | Yes (patients and outcome assessors)                                                                      | Unclear (36 week completion for 76 to 88%) | Yes                         | CMT significantly lower and VA significantly better in MPC group at baseline, other baseline values similar; power analysis carried out (power adequate for VA changes) | Ophthalmic Research Centre, Labbafinejad Medical Center, Tehran                                                                                                                                                                                                                                                                |

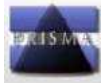

# PRISMA 2009 Checklist

1  
2  
3  
4  
5  
6  
7  
8  
9  
10  
11  
12  
13  
14  
15  
16  
17  
18  
19  
20  
21  
22  
23  
24  
25  
26  
27  
28  
29  
30  
31  
32  
33  
34  
35  
36  
37  
38  
39  
40  
41  
42  
43  
44  
45  
46  
47  
48  
49

| Section/topic                      | #  | Checklist item                                                                                                                                                                                                                                                                                              | Reported on page # |
|------------------------------------|----|-------------------------------------------------------------------------------------------------------------------------------------------------------------------------------------------------------------------------------------------------------------------------------------------------------------|--------------------|
| <b>TITLE</b>                       |    |                                                                                                                                                                                                                                                                                                             |                    |
| Title                              | 1  | Identify the report as a systematic review, meta-analysis, or both.                                                                                                                                                                                                                                         | 1                  |
| <b>ABSTRACT</b>                    |    |                                                                                                                                                                                                                                                                                                             |                    |
| Structured summary                 | 2  | Provide a structured summary including, as applicable: background; objectives; data sources; study eligibility criteria, participants, and interventions; study appraisal and synthesis methods; results; limitations; conclusions and implications of key findings; systematic review registration number. | 2                  |
| <b>INTRODUCTION</b>                |    |                                                                                                                                                                                                                                                                                                             |                    |
| Rationale                          | 3  | Describe the rationale for the review in the context of what is already known.                                                                                                                                                                                                                              | 5                  |
| Objectives                         | 4  | Provide an explicit statement of questions being addressed with reference to participants, interventions, comparisons, outcomes, and study design (PICOS).                                                                                                                                                  | 5                  |
| <b>METHODS</b>                     |    |                                                                                                                                                                                                                                                                                                             |                    |
| Protocol and registration          | 5  | Indicate if a review protocol exists, if and where it can be accessed (e.g., Web address), and, if available, provide registration information including registration number.                                                                                                                               | 1                  |
| Eligibility criteria               | 6  | Specify study characteristics (e.g., PICOS, length of follow-up) and report characteristics (e.g., years considered, language, publication status) used as criteria for eligibility, giving rationale.                                                                                                      | 6                  |
| Information sources                | 7  | Describe all information sources (e.g., databases with dates of coverage, contact with study authors to identify additional studies) in the search and date last searched.                                                                                                                                  | 6                  |
| Search                             | 8  | Present full electronic search strategy for at least one database, including any limits used, such that it could be repeated.                                                                                                                                                                               | Appendix 1         |
| Study selection                    | 9  | State the process for selecting studies (i.e., screening, eligibility, included in systematic review, and, if applicable, included in the meta-analysis).                                                                                                                                                   | 6                  |
| Data collection process            | 10 | Describe method of data extraction from reports (e.g., piloted forms, independently, in duplicate) and any processes for obtaining and confirming data from investigators.                                                                                                                                  | 6                  |
| Data items                         | 11 | List and define all variables for which data were sought (e.g., PICOS, funding sources) and any assumptions and simplifications made.                                                                                                                                                                       | 6-7                |
| Risk of bias in individual studies | 12 | Describe methods used for assessing risk of bias of individual studies (including specification of whether this was done at the study or outcome level), and how this information is to be used in any data synthesis.                                                                                      | 6                  |
| Summary measures                   | 13 | State the principal summary measures (e.g., risk ratio, difference in means).                                                                                                                                                                                                                               | 7                  |
| Synthesis of results               | 14 | Describe the methods of handling data and combining results of studies, if done, including measures of consistency (e.g., $I^2$ for each meta-analysis)                                                                                                                                                     | 7                  |

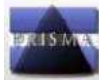

# PRISMA 2009 Checklist

Page 1 of 2

| Section/topic                 | #  | Checklist item                                                                                                                                                                                           | Reported on page # |
|-------------------------------|----|----------------------------------------------------------------------------------------------------------------------------------------------------------------------------------------------------------|--------------------|
| Risk of bias across studies   | 15 | Specify any assessment of risk of bias that may affect the cumulative evidence (e.g., publication bias, selective reporting within studies).                                                             | 6-7                |
| Additional analyses           | 16 | Describe methods of additional analyses (e.g., sensitivity or subgroup analyses, meta-regression), if done, indicating which were pre-specified.                                                         | 7                  |
| <b>RESULTS</b>                |    |                                                                                                                                                                                                          |                    |
| Study selection               | 17 | Give numbers of studies screened, assessed for eligibility, and included in the review, with reasons for exclusions at each stage, ideally with a flow diagram.                                          | 8                  |
| Study characteristics         | 18 | For each study, present characteristics for which data were extracted (e.g., study size, PICOS, follow-up period) and provide the citations.                                                             | Tables 2-7         |
| Risk of bias within studies   | 19 | Present data on risk of bias of each study and, if available, any outcome level assessment (see item 12).                                                                                                | 7-15               |
| Results of individual studies | 20 | For all outcomes considered (benefits or harms), present, for each study: (a) simple summary data for each intervention group (b) effect estimates and confidence intervals, ideally with a forest plot. | Figures 2-7        |
| Synthesis of results          | 21 | Present results of each meta-analysis done, including confidence intervals and measures of consistency.                                                                                                  | Figures 2-7        |
| Risk of bias across studies   | 22 | Present results of any assessment of risk of bias across studies (see Item 15).                                                                                                                          | Table 16           |
| Additional analysis           | 23 | Give results of additional analyses, if done (e.g., sensitivity or subgroup analyses, meta-regression [see Item 16]).                                                                                    | Figures 2-7        |
| <b>DISCUSSION</b>             |    |                                                                                                                                                                                                          |                    |
| Summary of evidence           | 24 | Summarize the main findings including the strength of evidence for each main outcome; consider their relevance to key groups (e.g., healthcare providers, users, and policy makers).                     | 17                 |
| Limitations                   | 25 | Discuss limitations at study and outcome level (e.g., risk of bias), and at review-level (e.g., incomplete retrieval of identified research, reporting bias).                                            | 17-18              |
| Conclusions                   | 26 | Provide a general interpretation of the results in the context of other evidence, and implications for future research.                                                                                  | 18-19              |
| <b>FUNDING</b>                |    |                                                                                                                                                                                                          |                    |
| Funding                       | 27 | Describe sources of funding for the systematic review and other support (e.g., supply of data); role of funders for the systematic review.                                                               | 1                  |

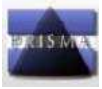

# PRISMA 2009 Checklist

For peer review only

1  
2  
3  
4  
5  
6  
7  
8  
9  
10  
11  
12  
13  
14  
15  
16  
17  
18  
19  
20  
21  
22  
23  
24  
25  
26  
27  
28  
29  
30  
31  
32  
33  
34  
35  
36  
37  
38  
39  
40  
41  
42  
43  
44  
45  
46  
47  
48  
49

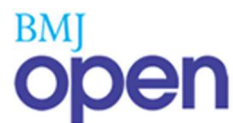

**Current treatments in Diabetic Macular Oedema: systematic review and meta-analysis**

|                                 |                                                                                                                                                                                                                                                                                                                                                                                   |
|---------------------------------|-----------------------------------------------------------------------------------------------------------------------------------------------------------------------------------------------------------------------------------------------------------------------------------------------------------------------------------------------------------------------------------|
| Journal:                        | <i>BMJ Open</i>                                                                                                                                                                                                                                                                                                                                                                   |
| Manuscript ID:                  | bmjopen-2012-002269.R1                                                                                                                                                                                                                                                                                                                                                            |
| Article Type:                   | Research                                                                                                                                                                                                                                                                                                                                                                          |
| Date Submitted by the Author:   | 01-Feb-2013                                                                                                                                                                                                                                                                                                                                                                       |
| Complete List of Authors:       | Ford, John; University of East Anglia, Public Health<br>Lois, Noemi; Queens University, Centre for Vascular and Visual Sciences<br>Royle, Pamela; Warwick Medical School, Warwick Evidence<br>Clar, Christine<br>Shyangdan, Deepson; Warwick Medical School, Warwick Evidence<br>Waugh, Norman; University of Warwick, Warwick Evidence; Warwick Medical School, Warwick Evidence |
| <b>Primary Subject Heading</b>: | Ophthalmology                                                                                                                                                                                                                                                                                                                                                                     |
| Secondary Subject Heading:      | Diabetes and endocrinology, Pharmacology and therapeutics                                                                                                                                                                                                                                                                                                                         |
| Keywords:                       | Diabetic retinopathy < DIABETES & ENDOCRINOLOGY, OPHTHALMOLOGY, Clinical trials < THERAPEUTICS                                                                                                                                                                                                                                                                                    |
|                                 |                                                                                                                                                                                                                                                                                                                                                                                   |

SCHOLARONE™  
Manuscripts

1  
2  
3 Title:

4  
5 *Current treatments in Diabetic Macular Oedema: systematic review and meta-analysis*

6  
7 Authors: John A. Ford<sup>1</sup>, Noemi Lois<sup>2</sup>, Pamela Royle<sup>3</sup>, Christine Clar<sup>4</sup>, Deepson Shyangdan<sup>3</sup>, Norman  
8 Waugh<sup>3</sup>  
9

10 <sup>1</sup> Norwich Medical School, University of East Anglia, Norwich

11 <sup>2</sup> Centre for Vascular and Visual Sciences, Queens University, Belfast

12 <sup>3</sup> Warwick Evidence, Division of Health Sciences, Warwick Medical School, Coventry, UK

13 <sup>4</sup> Researcher in systematic reviews, Berlin, Germany  
14  
15

16 Corresponding author

17 Dr. John Ford

18 Norwich Medical School

19 Faculty of Medicine and Health Sciences

20 University of East Anglia

21 Chancellors Drive

22 Norwich, NR4 7TJ

23 [john.ford@uea.ac.uk](mailto:john.ford@uea.ac.uk)

24 Tel: 01603 591269

25 Fax: 01603 593752  
26  
27

28 Funding: None

29 Conflicts of interest: None

30 Key words: anti-VEGF, steroid, diabetic macular oedema, ranibizumab, bevacizumab, pegaptanib,  
31 aflibercept, dexamethasone, fluocinolone, triamcinolone  
32  
33

34 Protocol: This review was built upon several technology appraisals for NICE and therefore no  
35 protocol exists.  
36

### 37 Disclosure

38  
39 The authors report no proprietary or commercial interest in any product mentioned or concept  
40 discussed in this article.  
41

42 No additional data available.  
43  
44  
45  
46  
47  
48  
49  
50  
51  
52  
53  
54  
55  
56  
57  
58  
59  
60



**Abstract (300 words max)**

Objectives: The aim of this systematic review is to appraise the evidence for the use of anti-VEGF drugs and steroids in diabetic macular oedema (DMO) as assessed by change in best corrected visual acuity (BCVA), central macular thickness and adverse events

Data source: MEDLINE, Embase, Web of Science with Conference Proceedings and the Cochrane Library (inception to July 2012). Certain conference abstracts and drug regulatory websites were also searched.

Study eligibility criteria, participants and interventions: Randomised controlled trials were used to assess clinical effectiveness and observational trials were used for safety. Trials which assessed triamcinolone, dexamethasone, fluocinolone, bevacizumab, ranibizumab, pegaptanib or aflibercept in patients with DMO were included.

Study appraisal and synthesis methods: Risk of bias was assessed using the cochrane risk of bias tool. Study results are narratively described and, where appropriate, data was pooled using random effects meta-analysis.

Results: Anti-VEGF drugs are effective compared to both laser and placebo and seem to be more effective than steroids in improving BCVA. They have been shown to be safe in the short-term but require frequent injections. Studies assessing steroids (triamcinolone, dexamethasone, fluocinolone) have reported mixed results when compared with laser or placebo. Steroids have been associated with increased incidence of cataracts and intra-ocular pressure rise but require fewer injections, especially when steroid implants are used.

Limitations: The quality of included studies varied considerably. Five out of fourteen meta-analyses had moderate or high statistical heterogeneity.

Conclusions and implications of key findings: The anti-VEGFs, ranibizumab and bevacizumab, have consistently shown good clinical effectiveness without major unwanted side effects. Steroids results have been mixed and are usually associated with cataract formation and IOP increase.

Despite the current wider spectrum of treatments for DMO, only a small proportion of patients recover good vision ( $\geq 20/40$ ) and, thus, the search for new therapies needs to continue.

## Article focus

- To review the evidence for triamcinolone, dexamethasone, fluocinolone, bevacizumab, ranibizumab, pegaptanib and aflibercept in the treatment of diabetic macular oedema

## Key messages

- The anti-VEGFs ranibizumab and bevacizumab, have consistently shown good clinical effectiveness in the short-term without major unwanted side effects
- Steroids results have been mixed and are usually associated with cataract formation and IOP increase

## Strengthens and limitations

- A robust, detailed review of the literature has been undertaken and, when appropriate, data has been combined in meta-analysis
- The quality of studies included varied considerably.

## I - Introduction

Diabetic macular oedema (DMO) is a complication of diabetic retinopathy and a leading cause of blindness. The prevalence of DMO is likely to increase with more people suffering from diabetes.[1] Increasing DMO has significant implications for patients, healthcare providers and wider society. Laser has been the mainstay of treatment, but recently anti-vascular endothelial growth factor (anti-VEGF) drugs and steroids have been introduced as potential alternatives to laser photocoagulation.

### a. Burden of disease

Diabetic retinopathy is present at the time of diagnosis of diabetes mellitus in 0-30% of individuals.[2] The incidence is estimated to be 2.3/100 person-years for the overall diabetic population and 4.5 for patients on insulin therapy.[3] There is good evidence that progression to DMO is associated with duration of disease[4-7], poor glycaemic control [8], and in type 2 diabetes, the need for insulin[9], though the need for insulin therapy is more a marker for duration, and poor control.

The number of people with DMO is likely to increase as diabetes becomes more common. Some reports have suggested a decrease in progression to severe visual loss between 1975-1985 and 1986-2008 in a combined population of type 1 and 2.[10] Regular screening for retinopathy and better glycaemic control are thought to have reduced the progression to severe visual loss. Diabetic retinopathy is associated with a reduced quality of life. Compared with all diabetic complications, blindness was perceived to be the third worst health state after a major stroke and amputation.[11]

In the US, the presence of DMO at diagnosis is associated with 29% additional costs within the first three years compared with individuals without retinopathy at diagnosis.[12] In 2010 the estimated healthcare costs for DMO in England were £92 million, with £65.6 million being spent on hospital treatment and related costs.[13]

Visual impairment results in increased welfare costs, early retirement, and costs of home help and carers.[14] In England in 2010 (total population 52.23 million) the estimated population with diabetes was 2.34 million; the above social costs were estimated to be £11.6 million for DMO.[13]

### b. Overview of pathophysiology

DMO is caused mainly by disruption of the blood-retinal barrier. The complex pathway that leads to this disruption has been previously described in this journal.[15] Sustained hyperglycaemia causes a multi-factorial cascade of physiological processes, involving increased permeability, cytokine activation, altered blood flow, hypoxia and inflammation. Vascular endothelial growth factor-A (VEGF-A) is a major contributor to the inflammatory process and, in particular, to angiogenesis and permeability.[16] Hypoxia caused by microvascular disease stimulates release of VEGF-A to aid perfusion. There are six major isoforms of VEGF-A: 121, 145, 165, 183, 189 and 206. In addition to causing widespread microvascular injury, there is now evidence that hyperglycaemia results in preceding neuronal dysfunction, which may contribute to visual loss.[17]

### c. Overview of current treatments

Laser photocoagulation has been the mainstay of treatment for DMO. The landmark Diabetic Retinopathy Study[18] and the Early Treatment Diabetic Retinopathy Study (ETDRS)[19,20] demonstrated its clinical effectiveness. However, although laser photocoagulation was clearly effective in preserving vision, it was less successful in restoring it, once lost. Furthermore, patients with perifoveal ischaemia are not amenable to this form of therapy. In EDTRS, although laser was shown to reduce the risk of moderate visual loss (a loss of 3 ETDRS lines) by 50%, visual acuity improved in only 3% of patients.[20] However in some recent trials, laser has improved the proportion of patients with more than or equal to 10 letters by 7-31%.[21-24] In addition, laser is not without side effects. Foveal burns, visual field defects, retinal fibrosis and laser scars have been reported.[25] Over the following decade it became apparent that certain patients suffered severe visual loss despite aggressive treatment.[26]

Steroids and anti-VEGF drugs are newer treatments in DMO. Intravitreal corticosteroids have potent anti-inflammatory effects. Triamcinolone (Kenalog) is not licensed for eye use but has been used to treat DMO for over ten years. Triamcinolone (Trivaris), more recently, was licensed for eye use. The development of intravitreal implants has allowed sustained release formulations. Fluocinolone acetonide (Iluvien, Alimera Sciences) and dexamethasone (Ozudex, Allergan) are implants that have been introduced recently.

Anti-VEGF agents have shown efficacy compared with laser. Bevacizumab (Avastin, Genentech/Roche) is a monoclonal antibody that targets all VEGF isoforms. Although being developed for colorectal cancer, it is widely used off-label, as an intravitreal treatment for macular oedema of different aetiologies. Ranibizumab (Lucentis, Genentech/Roche) is a fragment of the bevacizumab antibody (molecular weight of ranibizumab 48.4 kDa compared with 149 kDa for bevacizumab). It was designed specifically for use in the eye. Ranibizumab is considerably more expensive than bevacizumab (the estimated cost of ranibizumab is \$2,000 per dose compared with \$50 for bevacizumab).[27] Pegaptanib (Macugen, Eyetech Pharmaceuticals/Pfizer) is a PEGylated aptamer, with a high affinity to the VEGF isoform 165 and was approved for the treatment of exudative AMD in 2004. Aflibercept (Regeneron/Bayer HealthCare) is a recent addition to the anti-VEGF class that targets all forms of VEGF-A and placental growth factor.

### d. Aim of the review

The aim of this review is to provide clinicians with an up-to-date overview of current intra-ocular drug treatments for DMO. It is hoped that the information contained herein will assist clinicians to present their patients with the best evidence supporting each treatment, including possible complications. In addition, this review may be helpful to policy makers. The review focuses on the current evidence for the use of anti-VEGF drugs and steroids to treat DMO, as assessed by change in best corrected visual acuity (BCVA) (mean and proportion with more than two lines improvement), central macular thickness (CMT), as determined by optical coherence tomography (OCT), and their adverse events.

## II - Evidence acquisition

A systematic literature search was performed. The databases searched included MEDLINE, Embase, Web of Science with Conference Proceedings and the Cochrane Library. The dates searched were from the inception of each database until July 2012

The search terms combined the following key words:

ranibizumab or lucentis or bevacizumab or avastin or pegaptanib or macugen or aflibercept or vegf trap-eye or steroid\* or corticosteroid\* or dexamethasone or fluocinolone or triamcinolone or anti-VEGF\* or anti-vascular endothelial growth factor\*

AND

diabetic macular oedema or diabetic macular edema or diabetic retinopathy or diabetic maculopathy

AND

(masked or sham or placebo OR control group or random\*) OR (systematic review or meta-analysis) OR (risk or safety or adverse or harm or pharmacovigilance or side-effect\* or precaution\* or warning\* or contraindication\* or contra-indication\* or tolerability or toxic)

The meeting abstracts of the Association for Research in Vision and Ophthalmology, the American Diabetes Association (2002-2012) and the European Association for the Study of Diabetes were searched from 2002-2012.

In addition the web sites of the European Medicines Agency and the US Food and Drug Association were searched for data on registration status and safety. Clinicaltrials.gov and the EU Clinical Trials Register were searched in July 2012 for data on ongoing research.

Full details of the searches are shown in appendix 1.

Randomised controlled trials (RCT) were used to evaluate clinical effectiveness. Safety was assessed through both RCTs and observational studies.

RCTs were included provided that they 1) addressed the use of triamcinolone, dexamethasone, fluocinolone, bevacizumab, ranibizumab, pegaptanib or aflibercept in patients with DMO, 2) had a minimum follow-up of six months, and 3) had a minimum of 25 eyes per study arm. Studies were excluded if they 1) evaluated laser only, 2) assessed the effect of the above mentioned treatments in macular oedema due to other retinal diseases (instead of DMO), 3) used only a single dose, 4) were combined with a surgical intervention or 5) published studies in languages other than English. There were no exclusions based on drug dose. Trials were excluded if they evaluated combined drug treatment with surgery or systemic treatment.

Search results were screened by two independent authors (JF and PR/DS). Data were extracted by one author (CC) and checked by a second (JF). Data extracted included inclusion/exclusion criteria, baseline demographics, BCVA expressed as a change in logMAR/ETDRS letters or proportion of

1  
2  
3 participants with more than 2 or 3 lines BCVA improvement, CMT and adverse events. Risk of bias  
4 was assessed using the cochrane risk of bias tool.  
5

6 Studies were assessed for similarity in study population, interventions (dose and frequency),  
7 outcomes and time to follow up, with a view to including similar studies in a meta-analysis.  
8 Conference abstracts were excluded from the meta-analysis because their quality and detailed  
9 methodology was not clear. A difference of six months was allowed between study follow-ups  
10 because of potential heterogeneity from disease progression and differences in the number of doses  
11 prescribed. If salient data were not reported, such as standard deviations, data were sought by  
12 personal communication with authors. Data were analysed using Review Manager software. If data  
13 from multiple time points were available, the primary end point data was used. Data were entered  
14 by one author (JF) and double-checked by a second (DS). Mean difference were calculated for  
15 change in BCVA and CMT and odds ratios were calculated for proportion of participants with more  
16 than 2 lines improvement. 95% confidence intervals were calculated for all outcomes. Statistical  
17 heterogeneity was measured through  $I^2$  scores. A score of less than 30% was considered low  
18 heterogeneity, a score of more than 70% was considered high heterogeneity and scores between  
19 30% and 70% were considered moderate. A random effects model was used throughout. The  
20 random effects model assumes variability between studies and therefore models uncertainty into  
21 the meta-analysis. Fixed assumes no variability. Generally speaking the random effects model results  
22 in wider confidence intervals.  
23  
24  
25  
26  
27  
28  
29  
30  
31  
32  
33  
34  
35  
36  
37  
38  
39  
40  
41  
42  
43  
44  
45  
46  
47  
48  
49  
50  
51  
52  
53  
54  
55  
56  
57  
58  
59  
60

### III - Results

The literature search identified 430 unique articles for possible inclusion, as shown in figure 1. 328 articles were excluded on the basis of title and abstract, leaving 102 full papers to be read. Fifty-one of these articles were excluded; the reasons for their exclusion are summarised in table 1. Fifty-one articles from 29 studies met the inclusion criteria and were included in the review; these are described in tables 3 to 16. Seven studies were suitable for meta-analysis.

#### a. Study quality

The quality of the included studies was, in general, good as is shown in table 2. (Note that the meeting abstracts were not quality assessed, due to lack of details reported on the methods). Most studies adequately described sequence generation, except in three studies where it was unclear.[28-30] However allocation concealment was poorly described throughout, with only eight reports addressing this issue appropriately. [31-38] Reporting of masking also varied. A number of studies masked patients using sham injection or sham laser.[21,24,29,31,33,36,39,40] [38]. Various studies reported that masking of patients was impossible. Assessors, where reported, were masked. In two studies incomplete outcomes were not addressed.[31,41] Baseline characteristics were consistent within study treatment arms. Administration of laser followed the ETDRS protocol, or a modified version, in all studies that described laser administration.[21-24,28,30,33,34,42,43] Two studies, both available only as meeting abstracts, did not report the laser administration details. [44,45]

#### b. Intravitreal anti-VEGFs

The characteristics of all published studies including design, inclusion/exclusion criteria, intervention, outcomes and their timing are shown in tables 3 to 8. Safety data for each drug is shown in tables 9 to 16.

##### 1. Ranibizumab

Nine RCTs have evaluated ranibizumab as a potential new treatment for patients with DMO (table 3 and 8); seven were sponsored by industry, and two were an independent investigators-led.) [21,46](table 7). READ-2 was the first large RCT (n=126).[28,47] It compared ranibizumab (0.5 mg) alone, ranibizumab in combination with laser and laser alone. At six months BCVA had improved significantly in the ranibizumab alone group compared with laser alone or ranibizumab plus laser. Addition of laser to ranibizumab did not provide additional BCVA gain. REVEAL (n=396) compared ranibizumab (0.5mg) with ranibizumab plus laser and laser alone.[48] At 12 months both ranibizumab arms resulted in a statistically significantly better improvement in BCVA compared to laser alone. The addition of laser did not confer further benefit.

Within the past two years the results of RESOLVE[36], RESTORE[24], and RISE and RIDE[38] have been published in peer-reviewed journals. RESTORE (n=345) randomised similar groups as the READ-2 study (ranibizumab (0.5 mg) alone, laser alone and ranibizumab plus laser); outcomes were evaluated at 12 months. Ranibizumab improved mean BCVA, with laser providing no additional



benefit. Two year extended follow-up suggested that these results continued.[49] RESOLVE (n=151) compared two doses of ranibizumab (0.3 mg and 0.5 mg) with sham injection. The greatest improvement in BCVA at 12 months was in the 0.3 mg group (11.8 letter gain) compared to the 0.5 mg group (8.8 letters gain) or sham injection (1.4 letter loss). In this study, rescue laser was allowed after three months of treatment, if BCVA had decreased by 10 letters or more, or if the investigator considered the macula not to be flat as assessed by OCT. Only 4.9% of the ranibizumab group required rescue laser, compared with 34.7% in the sham injection group.

READ-2 and RESTORE were suitable for pooling through meta-analysis and, when doing so, it was found that ranibizumab statistically significantly improved mean BCVA compared with laser (figure 2). In regards to the proportion of patients gaining more than or equal to 15 letters, individual trials showed a statistically significant difference between laser and ranibizumab but when these two trials were pooled using a random effects model the result was no longer statistically significant. When a fixed effects model was used the result was statistically significant (figure not shown). Adding laser to ranibizumab did not add any significant benefit (figure 3). In fact the mean change in BCVA and the proportion of patients with more than 15-letter gain favoured, although not statistically significantly so, ranibizumab alone compared with ranibizumab plus laser. This was probably a chance effect.

RISE (n=377) and RIDE (n=382) were identical in design. The study arms are similar to those in the RESOLVE study; 0.3 mg or 0.5 mg ranibizumab compared with sham. In the RISE study the proportion of patients with 15 or more letter gain was greatest in the 0.3 mg group at 24 months, whereas in the RIDE study this was greatest in the 0.5 mg group. In the DRCRN trial (n = 854), Elman and colleagues compared ranibizumab (0.5 mg) plus prompt (within 3-10 days post ranibizumab) or deferred ( $\geq 24$  weeks) laser with sham injection plus prompt laser, or triamcinolone (4m g, Trivaris) plus prompt laser (table 8). At one year both ranibizumab groups reported greater gains in mean BCVA change than triamcinolone or laser alone. Interestingly at 2 years (n= 628), the proportion of patients with 10 or more letter gain was not statistically significantly different between ranibizumab plus prompt laser and laser alone groups, but was statistically significant in the ranibizumab plus deferred laser compared with laser alone comparison. The reason for this is not clear.

READ-3 (n=152) has been published in abstract form and compared monthly injections of intravitreal ranibizumab high dose (2.0 mg) and low dose (0.5 mg).[50] At six months there was not a statistically significant difference in BCVA between groups.

One study (n=63), published in abstract form, was identified which directly compared monthly injections of ranibizumab (0.5 mg) with bevacizumab (1.5 mg).[51] At 48 weeks the authors found no statistically significant difference between bevacizumab and ranibizumab.

RESTORE, READ-2 and DRCRN (12 month data used) were suitable for pooling through meta-analysis to compare ranibizumab plus laser and laser alone (figure 4). Ranibizumab plus laser resulted in a statistically significantly greater change in mean BCVA, proportion of patients with more than 15 letter gain and CMT reduction versus laser alone.

Adverse events are shown in tables 9 and 16. Conjunctival hemorrhages were higher in the ranibizumab arms compared with laser (RESTORE) or no treatment (RESOLVE). In the RESOLVE, RISE and RIDE studies a considerably higher incidence of intra-ocular pressure (IOP) increase was

1  
2  
3 reported in the ranibizumab arm compared to control. This increase in IOP was not demonstrated in  
4 the RESTORE study. There were no consistent differences in systemic adverse events between  
5 ranibizumab and laser or placebo.  
6

## 7 8 2. Bevacizumab

9  
10 Eight RCTs investigating the use of bevacizumab in DMO were identified (table 4 and 8). One RCT,  
11 the BOLT study (n=80), randomised patients to laser therapy or 1.25 mg intravitreal  
12 bevacizumab.[23,52] At 24 months, the mean change in BCVA and the proportion of patients who  
13 gained 10 ETDRS letters or more was statistically significantly higher in the bevacizumab arm than in  
14 the laser arm. Faghihi and colleagues (n=80), compared 1.25 mg bevacizumab (average 2.23  
15 injections per patient) with 1.25 mg bevacizumab plus a single laser treatment (average 2.49  
16 injections per patient).[53] After six months, the authors found both treatments to be effective at  
17 improving BCVA but neither treatment was found to result in a greater benefit.  
18  
19

20  
21 Lam and colleagues (n=52) compared two doses of bevacizumab (1.25 mg and 2.5 mg) in patients  
22 with diffuse DMO.[35] Patients with focal DMO associated with localised retinal thickening were  
23 excluded. At 6 months, following 3 initial monthly injections (no treatment in the remaining 3  
24 months), both groups showed a statistically significant increased mean BCVA compared with  
25 baseline vision, but there was no difference between doses.  
26

27  
28 Four trials have investigated the combination of bevacizumab and triamcinolone. Ahmadih and  
29 colleagues (n=115), compared combined bevacizumab (three 1.25 mg injections at six week  
30 intervals) plus triamcinolone (2 mg baseline injection only, Triamhexal) with bevacizumab alone  
31 (three 1.25 mg at six week intervals) and sham injection in patients who had DMO unresponsive  
32 (definition not reported) to previous laser (last session more than three months prior).[31] The  
33 combination arm and bevacizumab alone arm improved mean BCVA more than sham injection. For  
34 BCVA the combination of bevacizumab plus triamcinolone was non-statistically significantly better  
35 than bevacizumab alone.  
36  
37

38  
39 Soheilian and colleagues (n=150) compared combined bevacizumab (1.25 mg) plus triamcinolone (2  
40 mg) with bevacizumab alone and laser alone in patients who were laser naïve.[37,41] At 36 weeks,  
41 bevacizumab alone improved BCVA more than either combination therapy or laser, although the  
42 difference was not statistically significant. Extended follow up at 24 months showed that there was  
43 no statistically significant difference between groups for BCVA, however the direction of effect  
44 favour the bevacizumab and combination arms more than the laser.[54]  
45

46  
47 Lim and colleagues (n=111) also evaluated the combination of bevacizumab plus triamcinolone  
48 when compared with bevacizumab alone or triamcinolone alone.[55] At 12 months the authors  
49 found no statistically significant difference between groups for BCVA or CMT.  
50

51  
52 The Efficacy Study of Triamcinolone and Bevacizumab Intravitreal for Treatment of Diabetic Macular  
53 Oedema (ATEMD) study, currently only published in abstract form, compared combined therapy  
54 with bevacizumab (1.25 mg) and triamcinolone (4 mg) with each of these alone.[56] At six months  
55 they found no statistically significant difference between groups. One study comparing bevacizumab  
56 with ranibizumab is discussed above.[51] No bevacizumab trials were suitable for meta-analysis  
57 because treatment arms were not comparable among included studies.  
58  
59  
60

1  
2  
3 Adverse events are shown in tables 10 and 16. There was a low frequency of adverse events reported  
4 in the included trials. A higher incidence of mild anterior chamber reaction was reported in  
5 bevacizumab groups compared with controls. The incidence of IOP increase was comparable  
6 between bevacizumab and laser. Soheilian and colleagues, were the only authors to report the  
7 incidence of lens opacity.[37,41] No patients in the bevacizumab alone group were found to have  
8 lens opacities but in four patients (8%) in the bevacizumab plus triamcinolone group this finding was  
9 observed over the 36 week follow-up period.  
10  
11

### 12 3. Pegaptanib

14 Two studies have evaluated pegaptanib in DMO and both compared it with sham injection (table 5).  
15 Cunningham and colleagues compare three doses of pegaptanib (0.3 mg, 1 mg and 3 mg) and sham  
16 injection in laser naive patients (n=172).[39,57] At six months patients in the 0.3 mg and 1 mg  
17 groups performed statistically significantly better than those in either 3mg or sham groups. Six  
18 injections (median) were administered in the 0.3 mg and 1 mg group, whereas only five (median)  
19 injections were administered in the 3 mg group.  
20  
21

22 The second trial (n=260), reported by Sultan and colleagues in 2011, compared pegaptanib (0.3 mg)  
23 and sham injection. At two years, the pegaptanib group showed a statistically significantly greater  
24 improvement in mean BCVA compared with sham.[40] However there was no statistically significant  
25 difference in the proportion of patients with an improvement of 10 letters or more. Patients were  
26 allowed rescue laser at the assessors' discretion (25.2% of patients in the pegaptanib group and 45%  
27 of patients in the sham group received rescue treatment). In regards to meta-analysis, data were  
28 only available to combine these trials for proportion of patients with more than 15 letter gain.  
29 Although individually neither trial demonstrated a statistically significant difference favouring  
30 pegaptanib over sham (figure 5), when pooled together in meta-analysis a statistically significant  
31 difference in favour of pegaptanib was found (OR 1.94, 95%CI 1.01 to 3.71).  
32  
33  
34  
35

36 Adverse events for pegaptanib are shown in table 11. There was a higher incidence of eye pain  
37 compared to control (31% versus 17%). [39,57] Cataract formation was similar between pegaptanib  
38 and control groups. There was a higher incidence of IOP increase in the pegaptanib arm compared to  
39 control (17.4% versus 6.3%).[40]  
40  
41

### 42 4. Other anti-VEGF

43 Aflibercept has been evaluated in the Da Vinci study (n=219)[30,58] (table 5). Four regimens of  
44 aflibercept (0.5 mg 4 weekly, 2 mg 4 weekly, 2 mg monthly for three months then every 8 weeks,  
45 and 2 mg monthly for three months followed by treatment as required) were compared with laser.  
46 At six months, all aflibercept arms had a statistically better BCVA and CMT change than the laser  
47 arm. The regimen that resulted in greatest BCVA gain and CMT reduction was 2 mg every 4 weeks,  
48 however statistical significance between aflibercept arms was not reported. One year extended  
49 follow-up showed that all aflibercept arms were found to have a statistically significantly better  
50 BCVA compared to laser.[58]  
51  
52  
53

54 Adverse events are shown in table 12. There was a higher incidence of IOP increase and eye pain in  
55 the aflibercept group compared with laser. Other adverse events were too infrequent to draw  
56 meaningful conclusions. The incidence of cataracts was not reported.  
57  
58  
59  
60

### c. Steroids

#### 1. Dexamethasone

Two included trials assessed the use of dexamethasone to treat DMO (table 6); Haller 2010 (full text available)[59] and Callanan (available to date only in an abstract form).[44] Haller 2010 (n=171) compared two doses of dexamethasone, administered as an intravitreal implant (350 µm and 700 µm) through a 20-gauge transscleral incision, with no treatment. At 90 days only the 700 µm group showed a statistically significant higher proportion of patients with 10 or more letter gain compared to no treatment (33% compared with 12%, p = 0.007). The 350 µm group showed a non-statistically significant improvement compared with laser alone (21% compared with 12%). At 180 days there was no statistically significant difference between either the dexamethasone group and no treatment group. The treatment effect appeared to peak at three months.

The second trial, by Callanan and colleagues (n=253), compared dexamethasone (dose not reported) plus laser with laser alone. Although a greater improvement in mean BCVA was seen at 1-9 months in the dexamethasone plus laser group compared with laser alone, there was no statistically significant difference at 12 months. A mean of 1.6 implants were used over the 12 month period.

These trials were not suitable for meta-analysis since one study is only available in abstract form.

Adverse events are shown in table 13. In the 350 µm and 700 µm groups compared with no treatment, there was a higher incidence of anterior chamber cells (29.1/26.4% compared with 1.8%), anterior chamber flare (27.3/20.8% compared with 8.8%), vitreous hemorrhage (20/22.6% compared with 5.3%) and increased IOP (14.5/9.4% compared with 0%). However there was no statistically significant difference in the cataract formation between the groups at 12 months. [59] Callanan and colleagues reported an increase in IOP in the dexamethasone plus laser group compared with laser alone (20% compared with 1.6%).[44]

#### 2. Fluocinolone

Two trials assessed fluocinolone implant for DMO (table 6). The FAME study (n=956) compared two doses of fluocinolone (0.2 µg/day and 0.5 µg/day) with sham injection in patients with at least one prior laser treatment.[29] Approximately 25% of patients in each group had more than one prior laser treatment. At 24 months both doses of fluocinolone showed a statistically significant improvement in mean BCVA compared to sham. There was a modest difference between fluocinolone groups. Rescue laser was given after the first six weeks for persistent oedema and was allowed every three months. 35-37% of patients in the fluocinolone group and 59% in the sham injection group required rescue laser. Extended follow-up at 36 months showed that the both fluocinolone arms continued to result in a statistically significant benefit compared with sham.[60]

Pearson and colleagues (n=196) compared fluocinolone (0.59 mg) with standard of care, either laser or no treatment.[43] At three years there was no statistically significant difference in the proportion of patients with 15 letters gain or more (31% fluocinolone compared with 20% standard of care) between groups and proportion of patients losing 15 letters or more in the fluocinolone group (17% compared with 14%). Increased incidence of cataracts may have contributed to this difference.

1  
2  
3 These trials were not suitable for meta-analysis.

4  
5 Adverse events are shown in table 14. Pearson and colleagues reported a higher incidence of  
6 cataracts at three years in the fluocinolone group compared with standard of care (55.9% compared  
7 with 21.7%). In the extended report of the FAME study there was a considerably higher incidence of  
8 cataract surgery in phakic eyes in the 0.2 µg/day and 0.5µg/day fluocinolone groups (80.0% and  
9 87.2% compared with 27.3%) and increased IOP at any point (37% and 46% compared with 12%).  
10  
11

12 Following the demonstration in the FAME trial that a lower dose was about as good as higher ones,  
13 the higher doses are unlikely to be used.  
14

### 15 3. Triamcinolone

16  
17 Ten trials evaluating triamcinolone were identified (table 7 and 8). All trials evaluated intravitreal  
18 administration of triamcinolone, there were no trials evaluating posterior or anterior sub-tenon  
19 injections. Two trials used Trivaris[21,61], two trials used Kenacort [32,33], one trial used  
20 Kenalog[62], one trial used Trihexal [31] and four trials did not report the type of triamcinolone  
21 used.[34,37].[45,56] Three doses were assessed in the included studies (1 mg, 4 mg and 8 mg) and  
22 triamcinolone has been combined with laser or bevacizumab.  
23  
24

25  
26 Ip and colleagues (n=840) were the only authors to evaluate triamcinolone 1mg  
27 (Trivaris).[22,61,63,64] They found a statistically significant improvement in mean BCVA at two  
28 years in the laser group compared with the triamcinolone group and no significant difference  
29 between 1 mg compared with 4 mg.  
30

31  
32 Several trials compared 4 mg intravitreal triamcinolone. Ip and colleagues (n=840) found that laser  
33 therapy resulted in a greater improvement in mean BCVA at two years compared to 4 mg  
34 triamcinolone (Trivaris). [22,61,63,64] Lam and colleagues (n=111), found no statistically significant  
35 difference between laser and triamcinolone at six months (triamcinolone type not reported).[34]  
36 When these two trials were pooled through meta-analysis, the treatment effect favoured laser but  
37 differences were not statistically significant (figure 6). Ockrim and colleagues (n=88) compared 4 mg  
38 intravitreal triamcinolone (Kenalog) with laser alone.[62] At 12 months they found no statistically  
39 significant BCVA improvement between the triamcinolone and laser groups. Gillies and colleagues  
40 (n=69) compared 4 mg of triamcinolone (Kenacort) with sham injection.[32] Mean BCVA improved  
41 statistically significantly with triamcinolone at 24 months compared with sham injection (3.1 letters  
42 gain compared with 2.9 letters loss, p = 0.01).  
43  
44  
45

46  
47 Lam and colleagues (n=111) compared triamcinolone 4 mg alone with 4 mg of triamcinolone plus  
48 laser or laser alone.[34] At six months the authors found no difference in BCVA between any of the  
49 groups. Elman and colleagues (n=854) compared 4 mg of triamcinolone (Trivaris) plus laser with  
50 ranibizumab plus prompt (within 3-10 days) or deferred (more than 24 week) laser and laser  
51 alone.[21] At two years they found a statistically significant difference in mean BCVA between  
52 ranibizumab plus prompt/deferred laser compared with laser alone (7 letters gain/9 letters gain  
53 compared with 3 letters gain), but no difference with triamcinolone plus laser compared with laser  
54 alone (2 letters gain compared with 3 letters gain). Oliveira-Neto and colleagues (n=120) compared 4  
55 mg triamcinolone alone (triamcinolone type not reported) with 4 mg plus 1.25 mg bevacizumab.[56]  
56 At six months they found no statistically significant difference between groups.  
57  
58  
59  
60

1  
2  
3 The Elman and Lam studies were suitable for meta-analysis, which showed non-statistically  
4 significant improvements in mean BCVA and the proportions of patients with more or equal than 15  
5 letter gain in the triamcinolone plus laser group compared with laser alone (figure 7).  
6

7  
8 Adverse events are shown in table 15 and 16. Triamcinolone was associated with consistently higher  
9 incidences of IOP increase and cataracts. Gilles and colleagues reported a cataract rate of over 50%  
10 by three years in patients treated with triamcinolone.  
11

#### 12 13 14 d. Other pertinent studies 15

16 Only one study in abstract form directly compared bevacizumab with ranibizumab.[51]  
17 Bevacizumab and ranibizumab have been compared through indirect comparison of five trials.[65]  
18 There was no evidence of a difference between the drugs, however wide credible intervals meant  
19 that superiority of either drug could not be excluded.  
20

21  
22 Two-year results of the CATT (Comparison of AMD Treatment Trials) and one year results of the  
23 IVAN (Inhibit VEGF in Age-related choroidal Neovascularisation), recently published, have  
24 demonstrated a good safety profile of anti-VEGF therapies when used to treat patients with age-  
25 related macular degeneration.[66,67] The CATT study randomised 1208 patients with AMD to  
26 monthly or as required injection of either ranibizumab or bevacizumab. At 1 year the mean BCVA  
27 was similar in both groups (8.0 letter gain in bevacizumab and 8.5 in ranibizumab). Over two years,  
28 the rates of deaths, myocardial infarction and stroke did not differ between ranibizumab and  
29 bevacizumab treatment groups. However, there was a higher rate of serious adverse events in the  
30 bevacizumab compared with the ranibizumab group. This increased event rate was driven mainly  
31 by hospitalisations, (RR 1.29, 95%CI 1.01 to 1.66). However the hospitalisations were not caused by  
32 known adverse events of bevacizumab. Arterio-thrombotic events and heart failure occurred in less  
33 than 2% of participants in the IVAN, and there were more often observed in the ranibizumab group  
34 than in the bevacizumab group (p = 0.03). Further data from other ongoing clinical trials may  
35 provide more insight on the safety of anti-VEGF treatment and possible differences on this respect  
36 among available drugs.  
37

38  
39 Campbell and colleagues conducted a population based nested case-control study of 91,378 older  
40 adults with a history of physician diagnosed retinal disease.[68] The authors found that neither  
41 ranibizumab nor bevacizumab were associated with significant risks of ischaemic stroke, acute  
42 myocardial infarction, congestive heart failure, or venous thromboembolism."  
43

44  
45 A recent systematic review specifically assessing adverse events in anti-VEGF drugs found a low  
46 incidence of serious (below 1 in 100) and non-serious ocular events (below 1 in 500) from  
47 ranibizumab, bevacizumab and pegaptanib.[69]  
48

49  
50 Fung and colleagues used an internet-based survey of clinicians to assess the safety of  
51 bevacizumab.[70] The survey covered over 5000 patients and found that bevacizumab was  
52 associated with an infrequent incidence of adverse events (all less than 0.21%).  
53

54  
55 One study which assessed diclofenac did not meet the inclusion criteria (follow-up for only 12  
56 weeks).[71] The authors randomised 32 patients to either intravitreal diclofenac or triamcinolone  
57  
58  
59



1  
2  
3 and found that both diclofenac and triamcinolone reduced CMT, but a statistically significant visual  
4 improvement was observed only in the triamcinolone group.  
5

6 Sfikakis and colleagues undertook a 30-week randomised crossover trial comparing infliximab and  
7 placebo.[72] The study failed to meet our inclusion criteria (only 11 patients included). The authors  
8 found that infliximab resulted in a 28.6% improvement in vision compared with 4.3% with placebo.  
9 The improvement seen with placebo could be due to a “carry over effect”, seen in cross over trials.  
10

11 The Fenofibrate Intervention and Event Lowering in Diabetes (FIELD) trial was primarily a study to  
12 see if the lipid-lowering agent fenofibrate, could reduce macrovascular and microvascular events in  
13 type 2 diabetes.[73] However a substudy within FIELD recruited 1012 patients to a retinopathy  
14 study. The primary outcome in the main study was need for laser therapy (3.4% on fenofibrate  
15 versus 4.9% on placebo) but the substudy used retinal photography to assess progression of  
16 retinopathy or development of macular oedema. The hazard ratio at six years for DMO was 0.69  
17 (95%CI 0.54 to 0.87) in the fenofibrate group compared to placebo.  
18  
19

20 Ruboxistaurin is another oral agent which has been assessed for the treatment of DMO. Aiello and  
21 colleagues randomised 686 patients to receive placebo or one of three doses of ruboxistaurin.  
22 [74,75] There was no statistically significant difference in delay to sight-threatening DMO in any  
23 ruboxistaurin group compared to placebo. The authors suggest that differences in laser treatment  
24 between groups may have contributed to the non-significant finding.  
25  
26  
27  
28  
29

#### 30 e. Assessment of heterogeneity within meta-analysis

31 Heterogeneity was assessed methodologically and statistically. Methodological heterogeneity was  
32 assessed by comparing study population, interventions, outcome measures and follow-up. Studies  
33 that were not methodologically comparable were excluded from the meta-analysis. For example  
34 bevacizumab trials were not pooled because Soheilian and colleagues included patients who were  
35 laser naïve[37] and Ahmadiéh and colleagues included patients who were unresponsive to laser.[31]  
36 Some analyses were also excluded because sufficient details were not reported in the studies. For  
37 example several studies failed to report standard deviations.[35,39]  
38  
39

40 Statistical heterogeneity was assessed through  $I^2$  scores. High statistical heterogeneity was found in  
41 two analyses (2.3, 4.3). Therefore these results should be interpreted with due caution. Moderate  
42 heterogeneity was found in three analyses (2.2, 3.1, 3.2). Low heterogeneity was found in the  
43 remaining eight analyses.  
44  
45  
46  
47  
48

#### 49 f. Ongoing trials

50 There are numerous on-going studies listed in appendix 2. The most salient studies include a study  
51 to compare ranibizumab and bevacizumab (Schmidt-Erfurth), a study investigating rescue  
52 ranibizumab treatment for patients who have failed on bevacizumab (Chaudhry), a study evaluating  
53 two algorithms for ranibizumab, ‘treat and extend’ and ‘as required’ (RETAIN), further studies of  
54  
55  
56  
57  
58  
59  
60

1  
2  
3 Trap-eye (VIVID and VISTA) and trials which are examining the use of NSAIDs, such as diclofenac and  
4 nepafenac (NEVANAC and Soheilian).  
5  
6  
7  
8  
9  
10  
11  
12  
13  
14  
15  
16  
17  
18  
19  
20  
21  
22  
23  
24  
25  
26  
27  
28  
29  
30  
31  
32  
33  
34  
35  
36  
37  
38  
39  
40  
41  
42  
43  
44  
45  
46  
47  
48  
49  
50  
51  
52  
53  
54  
55  
56  
57  
58  
59  
60

For peer review only



#### IV – Discussion

It appears that anti-VEGF treatment is effective in DMO, especially ranibizumab and bevacizumab. Meta-analysis of available short-term data (up to 2 years) suggests that ranibizumab is superior to laser and that adding laser to ranibizumab treatment does not confer additional benefit. Steroid treatment has demonstrated mixed success and, almost uniformly, increased incidence of cataracts and increased IOP. The licence for fluocinolone takes note of this and it is positioned as a treatment when others have failed.

##### a. Strengths and limitations of the review

There are a number of strengths of this review. A robust systematic review methodology was used. Reliability was improved by excluding trials with small sample sizes or short follow up. Since a number of trials included similar intervention arms, consistent treatment effects further improve reliability. Validity was improved by assessing the quality of trials using the Cochrane risk of bias tables. Including abstracts from ARVO provided up to date results. Pooling results through meta-analysis provided further evidence. The random effects model was used throughout to allow for heterogeneity among studies.

This review, however, has limitations. Although the inclusion of abstracts provides a more up to date results, the studies contained in these abstracts could not be assessed for risk of bias and should therefore be interpreted with caution. In addition, reporting of quality assessment criteria was variable. Allocation concealment was especially poorly reported. There was only one study which compared different anti-VEGFs<sup>[51]</sup> and none that compared steroids (fluocinolone vs dexamethasone vs. triamcinolone). Therefore it is difficult to assess the effectiveness within drug classes. As with any meta-analysis questions of heterogeneity arise. Follow-up periods varied among studies. A difference of six months was allowed for studies to be pooled for meta-analysis but this could have still resulted in heterogeneity. High statistical heterogeneity was found in a quarter of analyses. Furthermore because of the low number of trials included, publication bias could not be assessed by funnel plot analysis. The manufacturers funded most of the trials for ranibizumab, pegaptanib, dexamethasone and fluocinolone, whereas trials for bevacizumab and triamcinolone were generally funded by non-pharmaceutical organisations. Generally, the non-commercial studies had smaller numbers, perhaps because of funding restraints.

It is important to note that there may be differences in laser treatment protocol between studies. This applies to trials which combine drug treatments with laser or include laser as a comparator. All studies referred to the ETDRS protocol [19,20] or a modified version of it. In the ETDRS, once the diagnosis of clinically significant macular oedema was made, an angiogram was obtained to identify "treatable lesions". "Treatable lesions" included discrete points of retinal hyperfluorescence or leakage (most of these are often microaneurisms), areas of diffuse leakage within the retina related to microaneurisms, intraretinal microvascular abnormalities, diffusely leaking retinal capillary bed and retinal avascular zones. In the ETDRS protocol, treatment of lesions closer than 500 microns from the centre of the macula was not required initially; however if vision was less than 20/40 and the oedema and leakage persisted, treatment up to 300 microns from the

1  
2  
3 centre of the macula was recommended unless there was capillary dropout; in the latter case  
4 treatment was not recommended as it may lead to further loss of perifoveal capillaries  
5

6  
7 However in routine clinical practice clinicians generally use lighter and less intense treatment than  
8 specified in the ETDRS protocol.[76] In addition, some centres do not use fluorescein angiography  
9 (unlike the ETDRS study[19]) to guide treatment. The exact adherence to the ETDRS protocol within  
10 studies is unclear. For example, in the BOLT study a modified ETDRS protocol was used. One of the  
11 aims of the protocol was “not darkening/whitening of microaneuysms”, which is not consistent with  
12 the ETDRS protocol.  
13

#### 14 15 16 17 b. Interpretation of the results

18  
19 The anti-VEGF drugs appear to be clinically effective in treating DMO in short-term studies (up to 2  
20 years). Ranibizumab has the most robust evidence base and has shown superiority compared to  
21 laser and sham injection in all trials and meta-analyses, except for the proportion of patients with 10  
22 or more letter gain in the DRCR.net study published by Elman and colleagues at two years follow  
23 up.[46] Adding laser to ranibizumab conferred no benefit. Bevacizumab has also been shown to be  
24 superior to laser. Three doses have been used (1.25 mg, 1.5 mg and 2.5 mg). The higher dose does  
25 not appear to add further benefit, and most studies in the literature use 1.25 mg. Addition of  
26 triamcinolone to bevacizumab did not provide further benefits. Pegaptanib has only been compared  
27 to sham injection. Mean change in BCVA favoured pegaptanib, but only through meta-analysis did  
28 the proportion of patients with more than 15 letter gain favour pegaptanib. Further published data  
29 are required before drawing conclusions on aflibercept. However although the anti-VEGF drugs are a  
30 significant advance, they fail to improve BCVA by 10 or more letters in half or more patients, and so  
31 they do not provide a complete answer to DMO.  
32  
33  
34

35  
36 Steroid treatments have inconsistent results and are undoubtedly associated with increased IOP and  
37 cataract. The effects of dexamethasone appear to peak at three months. At six months there was no  
38 significant difference compared with laser. This might imply that earlier re-treatment is needed if  
39 the beneficial effect is to be maintained, but increasing the number of treatments would likely  
40 increase the associated complications, especially with the relatively large needle size. The addition  
41 of laser did not appear to add further benefit. There was no significant difference in cataract  
42 formation at six months with dexamethasone compared to observation but it is likely that a higher  
43 incidence of cataracts would be seen with longer follow-up. Significantly more patients suffered  
44 increased IOP in the dexamethasone group compared with observation. Fluocinolone has been  
45 shown to be effective compared with sham injection (FAME)[29,60], however when compared to  
46 standard of care (laser or observation at clinician’s discretion) there was no significant difference in  
47 the proportion of patients with a 15 letter or more gain. Both studies reported higher incidence of  
48 cataract formation in the fluocinolone group, over 80% at three years at the higher dose. Results for  
49 triamcinolone are inconsistent. Ip and colleagues found that laser was more effective[61], others  
50 have found no statistically significant difference. Triamcinolone combined with laser, however,  
51 seemed to have similar efficacy as ranibizumab combined with laser in pseudophakic eyes.[21,46]  
52 Triamcinolone is more effective than sham injection. Triamcinolone has consistently been associated  
53 with increased incidence of cataract and raised IOP.  
54  
55  
56  
57  
58  
59  
60

1  
2  
3 Steroids and laser therapy may affect CMT in a different manner from anti-VEGF drugs. For example,  
4 when ranibizumab alone is compared with ranibizumab plus laser, ranibizumab alone appears to be  
5 more effective in terms of mean change in BCVA and proportion of patients with more than 15  
6 letters gain. However ranibizumab plus laser is more effective at reducing CMT. Furthermore when  
7 triamcinolone plus laser is compared with ranibizumab plus laser, ranibizumab plus laser appears to  
8 be more effective in terms of change in BCVA and proportion of patients with more than 15 letters  
9 gain, but triamcinolone plus laser is more effective at reducing CMT. The reasons for this are  
10 unclear. There is a weak correlation between CMT and BCVA. However the long term benefits of  
11 reducing CMT are currently unknown.  
12  
13

14  
15 No large observational studies were identified that compared anti-VEGF drugs. Fung and colleagues,  
16 using an internet based survey, found the incidence of adverse events in bevacizumab to be low.[70]  
17 One small outbreak of sterile endophthalmitis was reported with a single batch of bevacizumab in  
18 Canada, emphasising the need for sterility when preparing aliquots.[77] Curtis and colleagues  
19 carried out a very large retrospective cohort study in 146,942 patients aged 65 and over with age-  
20 related macular degeneration (AMD).[78] Their aim was to examine the cardiovascular outcomes in  
21 patients treated with the four options: photodynamic therapy (PDT), pegaptanib, bevacizumab and  
22 ranibizumab. The authors reported that one of their comparisons showed an increase in overall  
23 mortality and stroke risk with bevacizumab compared to ranibizumab, with hazard ratios 0.86  
24 (95%CI 0.75 to 0.98) and 0.78 (0.64 to 0.96) respectively. However because of the very large cost  
25 differences between bevacizumab and ranibizumab, the authors noted that selection bias might be  
26 operating, with poorer people (with poorer health) more likely to be treated with bevacizumab.  
27 They therefore carried out another analysis using only ophthalmological clinics which used only one  
28 drug, to avoid selection bias. This analysis showed no significant difference: overall mortality hazard  
29 ratio for ranibizumab 1.10 (95%CI 0.85 to 1.141); MI 0.87 (0.53 to 1.14); stroke 0.87 (0.61 to 1.24).  
30  
31  
32  
33

34  
35 Gower and colleagues analysed 77,886 anti-VEGF injections from Medicare data (46% ranibizumab  
36 and 54% bevacizumab).[79] Results have only been published in abstract form. The authors found an  
37 increased risk of overall mortality and cerebrovascular events in the bevacizumab group (HR 1.11  
38 99%CI 1.01 to 1.23 and 1.57, 1.04 to 2.37 respectively). There was no statistically significant  
39 increased risk in the ranibizumab group. The authors acknowledge that a limitation of the study is a  
40 failure to adjust for important confounding factors (such as smoking, hypertension and  
41 hyperlipidaemia). Considering the cost difference, it is likely that patients treated with bevacizumab  
42 would have been in a lower socio-economic class and therefore would be at high risk of mortality  
43 and vascular disease.  
44  
45  
46  
47

#### 48 49 c. Implications for clinicians

50  
51 The anti-VEGF drugs appear to be a significant advance in the treatment of DMO and are regarded  
52 now as the treatment of choice for patients affected by this condition. Studies assessing the  
53 effectiveness of steroids have reported mixed results. The high rates of cataract and increased IOP  
54 are a drawback. Triamcinolone combined with laser may be a good option for pseudophakic patients  
55 and may be more cost-effective than treatment with ranibizumab. However the need for fewer  
56 administrations, potentially one every three years with fluocinolone, is advantageous. From an  
57 administration perspective, some patients might prefer infrequent steroid injections with a sizeable  
58  
59  
60

1  
2  
3 risk of cataract, and a small, but existent, risk of glaucoma, to frequent anti-VEGF injections, even if  
4 the potential gain may not be fully comparable. Steroids may be also considered for patients that do  
5 not adequately respond to anti-VEGFs. Currently, the role of laser in the treatment of DMO is  
6 debatable. Short term data from available trials have demonstrated the superiority of anti-VEGF  
7 with regards to laser treatment and have failed to demonstrate a benefit of combining both  
8 treatment approaches. It is possible that some ophthalmologists may still opt to offer laser  
9 treatment to patients with very focal areas of leakage.  
10  
11

12  
13 Currently there is more evidence for the effectiveness of ranibizumab and bevacizumab than for  
14 pegaptanib and VEGF-trap eye. The results of direct head to head trials of ranibizumab and  
15 bevacizumab are awaited. Bevacizumab is not licensed for intraocular use but costs considerably  
16 less than other forms of therapy. Ranibizumab is licensed and more expensive, but its use is  
17 supported by large manufacturer funded trials demonstrating its clinical effectiveness. In the UK,  
18 the General Medical Council recommends that unlicensed medications should only be prescribed if  
19 “an alternative, licensed medicine would not meet the patient’s needs” and there is “a sufficient  
20 evidence base and/or experience of using the medication to demonstrate its safety and  
21 efficacy”.<sup>[80]</sup> The FDA says that when using a drug “off-label” clinicians “have the responsibility to  
22 be well informed about the product, to base its use on firm scientific rationale and on sounded  
23 medical evidence, and to maintain records of the product's use and effects”.<sup>[81]</sup> Patients should be  
24 fully aware of the use of any unlicensed medication and consent to any safety or efficacy  
25 uncertainties.  
26  
27  
28

29  
30 The place of intravitreal steroids needs consideration now that we have the anti-VEGFs drugs, as  
31 does the role of laser. The anti-VEGFs drugs may now be the first-line treatment in place of laser,  
32 with laser being used selectively for focal lesions, and in sequence after anti-VEGF therapy once the  
33 retinal thickness has been reduced. However it should be noted that about half of patients do not  
34 get good results with anti-VEGFs. In RESTORE, only 50% of patients had gains in VA of 10 or more  
35 letters. So the anti-VEGFs are “game-changers” but their impact should not be over-estimated.  
36  
37

38  
39 In those who do not respond to anti-VEGFs or laser, there remains a place for steroids, despite their  
40 high adverse effect rates. The European licence for fluocinolone recognises this, by stating that it  
41 should be used when other therapies have not had sufficient effect.<sup>[82]</sup> The commonest adverse  
42 effect is cataract, but that is very common in people with diabetes, and many are already  
43 pseudophakic when treatment of DMO is required.  
44

45  
46 Vitreoretinal surgery for the treatment of DMO was not included in our review. Laidlaw reviewed  
47 the literature and only found evidence for vitrectomy when there was signs of clinical or OCT  
48 traction.<sup>[83]</sup> However even in these cases, the evidence was not strong.  
49  
50

#### 51 52 d. Implications for policy makers

53  
54 In the UK, the National Institute of Health and Clinical Excellence (NICE) has recently made the  
55 decision not to recommend ranibizumab for the treatment of DMO.<sup>[84]</sup> NICE concluded that  
56 ranibizumab, although clinically effective, was not cost-effective compared to laser therapy.  
57 Bevacizumab is less than a tenth of the cost of ranibizumab. Bevacizumab is unlikely to be licensed.  
58  
59  
60

1  
2  
3 This beckons the question as to whether policy makers should recommend cheaper unlicensed  
4 medications over a more expensive licensed alternative when efficacy and side effects appear  
5 similar.  
6  
7

8  
9  
10 e. Unanswered questions

11 Several unanswered questions remain. Studies evaluating the effectiveness of ranibizumab  
12 compared with bevacizumab are needed. Although the anti-VEGFs are clinically effective and a  
13 major step forward in the management of DMO, it has to be noted that they have little effect in a  
14 large number of patients. Generally speaking, the proportion of patients who have demonstrated 10  
15 or more letter gain using anti-VEGFs is between 30-50% in the trials that demonstrate greatest  
16 effectiveness. Most of these patients would not achieve the 20/40 visual acuity required for driving.  
17 More effective treatments, or combinations of treatments, are required.  
18  
19

20  
21 There is a lack of specific evidence for the use of anti-VEGF drugs or steroids in patients with macular  
22 ischemia secondary to DMO. A number of trials excluded patients with macular  
23 ischemia.[23,34,35,40,53,62] The RESTORE trial included patients with macular ischemia and  
24 undertook a subgroup analysis.[24] The authors compared patients with (n=34) and without (n=35)  
25 macular ischemia at baseline. They found that those without macular ischemia responded better to  
26 ranibizumab (mean average change in BCVA at 12 months 7.2 letters gain compared with 6.3  
27 letters). Larger trials are needed to assess the use of anti-VEGF drugs and steroids in patients with  
28 macular ischemia.  
29  
30

31  
32 The duration of treatment is as yet uncertain. Most of the included studies use a retreatment  
33 protocol based on clinical need or OCT results. For example, in the BOLT study patients received a  
34 median of 9 injections of bevacizumab over 24 months.[23,85] However, it is not yet known how  
35 frequent long-term maintenance injections will be needed for and whether laser treatment in  
36 sequence could potentially reduce the number of anti-VEGF injections required. Other treatment  
37 strategies to apply laser, such as using laser power at sub-threshold levels, may prove more  
38 effective.[86] Future trials should use active comparators which are used in routine clinical practice  
39 and avoid placebo controlled trials.  
40  
41  
42  
43  
44  
45  
46  
47  
48  
49  
50  
51  
52  
53  
54  
55  
56  
57  
58  
59  
60

## V - Conclusion

This review evaluated current treatments for DMO. Undoubtedly, the use of anti-VEGFs heralds a new era for patients who suffer from DMO. Currently, the anti-VEGFs ranibizumab and bevacizumab, have consistently shown good clinical effectiveness without major unwanted side effects. Steroids results have been mixed and are usually associated with cataract formation and IOP increase. Based on the short term data available, adding laser therapy to anti-VEGFs does not appear to confer additional benefit.

Despite the current wider spectrum of treatments for DMO, only a small proportion of patients recover good vision ( $\geq 20/40$ ) and, thus, the search for new therapies to prevent and manage DMO needs to continue.

1  
2  
3 Contribution of authors  
4

5 JF screened titles, checked data extraction, performed the meta-analysis and drafted manuscript. NL  
6 conceived the idea, interpreted the results and provided clinical expertise throughout. PR performed  
7 the literature search, updated the searches, screened titles and managed the references. CC  
8 extracted data from the studies. DS screened titles and checked the meta-analysis. NW designed the  
9 review and supervised the running of the study. All authors contributed to the final draft.  
10  
11  
12  
13  
14  
15  
16  
17  
18  
19  
20  
21  
22  
23  
24  
25  
26  
27  
28  
29  
30  
31  
32  
33  
34  
35  
36  
37  
38  
39  
40  
41  
42  
43  
44  
45  
46  
47  
48  
49  
50  
51  
52  
53  
54  
55  
56  
57  
58  
59  
60

For peer review only



## Reference List

1. Holman N, Forouhi NG, Goyder E, et al. The Association of Public Health Observatories (APHO) Diabetes Prevalence Model: estimates of total diabetes prevalence for England, 2010-2030. *Diabet Med* 2011;28:575-82.
2. Williams R, Airey M, Baxter H, et al. Epidemiology of diabetic retinopathy and macular oedema: a systematic review. *Eye (Lond)* 2004;18:963-83.
3. Henricsson M, Sellman A, Tyrberg M, et al. Progression to proliferative retinopathy and macular oedema requiring treatment. Assessment of the alternative classification of the Wisconsin Study. *Acta Ophthalmol Scand* 1999;77:218-23.
4. Chen E, Looman M, Laouri M, et al. Burden of illness of diabetic macular edema: literature review. *Curr Med Res Opin* 2010;26:1587-97.
5. Hirai FE, Knudtson MD, Klein BE, et al. Clinically significant macular edema and survival in type 1 and type 2 diabetes. *Am J Ophthalmol* 2008;145:700-6.
6. Klein R, Klein BE, Moss SE, et al. The Wisconsin Epidemiologic Study of Diabetic Retinopathy: XVII. The 14-year incidence and progression of diabetic retinopathy and associated risk factors in type 1 diabetes. *Ophthalmology* 1998;105:1801-15.
7. Klein R, Knudtson MD, Lee KE, et al. The Wisconsin Epidemiologic Study of Diabetic Retinopathy XXIII: the twenty-five-year incidence of macular edema in persons with type 1 diabetes. *Ophthalmology* 2009;116:497-503.
8. Knudsen LL, Lervang HH, Lundbye-Christensen S, et al. The North Jutland County Diabetic Retinopathy Study (NCDRS) 2. Non-ophthalmic parameters and clinically significant macular oedema. *Br J Ophthalmol* 2007;91:1593-5.
9. Thomas RL, Dunstan F, Luzio SD, et al. Incidence of diabetic retinopathy in people with type 2 diabetes mellitus attending the Diabetic Retinopathy Screening Service for Wales: retrospective analysis. *BMJ* 2012;344:e874.
10. Wong TY, Mwamburi M, Klein R, et al. Rates of progression in diabetic retinopathy during different time periods: a systematic review and meta-analysis. *Diabetes Care* 2009;32:2307-13.
11. Huang ES, Brown SE, Ewigman BG, et al. Patient perceptions of quality of life with diabetes-related complications and treatments. *Diabetes Care* 2007;30:2478-83.
12. Shea AM, Curtis LH, Hammill BG, et al. Resource use and costs associated with diabetic macular edema in elderly persons. *Arch Ophthalmol* 2008;126:1748-54.
13. Minassian DC, Owens DR, Reidy A. Prevalence of diabetic macular oedema and related health and social care resource use in England. *Br J Ophthalmol* 2012;96:345-9.
14. Happich M, Reitberger U, Breitscheidel L, et al. The economic burden of diabetic retinopathy in Germany in 2002. *Graefes Arch Clin Exp Ophthalmol* 2008;246:151-9.



- 1
- 2
- 3 15. Bhagat N, Grigorian RA, Tutela A, et al. Diabetic macular edema: pathogenesis and
- 4 treatment. *Surv Ophthalmol* 2009;54:1-32.
- 5
- 6 16. Murata T, Ishibashi T, Khalil A, et al. Vascular endothelial growth factor plays a role in
- 7 hyperpermeability of diabetic retinal vessels. *Ophthalmic Res* 1995;27:48-52.
- 8
- 9 17. Barile GR, Pachydaki SI, Tari SR, et al. The RAGE axis in early diabetic retinopathy. *Invest*
- 10 *Ophthalmol Vis Sci* 2005;46:2916-24.
- 11
- 12 18. The Diabetic Retinopathy Study Research Group. Preliminary report on effects of
- 13 photocoagulation therapy. *Am J Ophthalmol* 1976;81:383-96.
- 14
- 15 19. Early Treatment Diabetic Retinopathy Study research group. Photocoagulation for diabetic
- 16 macular edema. Early Treatment Diabetic Retinopathy Study report number 1. *Arch*
- 17 *Ophthalmol* 1985;103:1796-806.
- 18
- 19 20. Early Treatment Diabetic Retinopathy Study research group. Treatment techniques and
- 20 clinical guidelines for photocoagulation of diabetic macular edema. Early Treatment Diabetic
- 21 Retinopathy Study Report Number 2. *Ophthalmology* 1987;94:761-74.
- 22
- 23 21. Elman MJ, Aiello LP, Beck RW, et al. Randomized trial evaluating ranibizumab plus prompt or
- 24 deferred laser or triamcinolone plus prompt laser for diabetic macular edema.
- 25 *Ophthalmology* 2010;117:1064-77.
- 26
- 27 22. Ip MS, Bressler SB, Antoszyk AN, et al. A randomized trial comparing intravitreal
- 28 triamcinolone and focal/grid photocoagulation for diabetic macular edema: baseline
- 29 features. *Retina* 2008;28:919-30.
- 30
- 31 23. Michaelides M, Kaines A, Hamilton RD, et al. A prospective randomized trial of intravitreal
- 32 bevacizumab or laser therapy in the management of diabetic macular edema (BOLT study)
- 33 12-month data: report 2. *Ophthalmology* 2010;117:1078-86.
- 34
- 35 24. Mitchell P, Bandello F, Schmidt-Erfurth U, et al. The RESTORE study: ranibizumab
- 36 monotherapy or combined with laser versus laser monotherapy for diabetic macular edema.
- 37 *Ophthalmology* 2011;118:615-25.
- 38
- 39 25. Lovestam-Adrian M, Agardh E. Photocoagulation of diabetic macular oedema--complications
- 40 and visual outcome. *Acta Ophthalmol Scand* 2000;78:667-71.
- 41
- 42 26. Lee CM, Olk RJ. Modified grid laser photocoagulation for diffuse diabetic macular edema.
- 43 Long-term visual results. *Ophthalmology* 1991;98:1594-602.
- 44
- 45 27. Nwanze CC, Akinwale A, Adelman RA. Bevacizumab vs. Ranibizumab in Preserving or
- 46 Improving Vision in Patients with Wet, Age-Related Macular Degeneration: A Cost-
- 47 effectiveness Review. *Clinical Medicine Insights: Therapeutics* 2012;4:29-38.
- 48
- 49 28. Nguyen QD, Shah SM, Khwaja AA, et al. Two-year outcomes of the ranibizumab for edema of
- 50 the macula in diabetes (READ-2) study. *Ophthalmology* 2010;117:2146-51.
- 51
- 52 29. Campochiaro PA, Brown DM, Pearson A, et al. Long-term benefit of sustained-delivery
- 53 fluocinolone acetonide vitreous inserts for diabetic macular edema. *Ophthalmology*
- 54 2011;118:626-35.
- 55
- 56
- 57
- 58
- 59
- 60

- 1
  - 2
  - 3
  - 4
  - 5
  - 6
  - 7
  - 8
  - 9
  - 10
  - 11
  - 12
  - 13
  - 14
  - 15
  - 16
  - 17
  - 18
  - 19
  - 20
  - 21
  - 22
  - 23
  - 24
  - 25
  - 26
  - 27
  - 28
  - 29
  - 30
  - 31
  - 32
  - 33
  - 34
  - 35
  - 36
  - 37
  - 38
  - 39
  - 40
  - 41
  - 42
  - 43
  - 44
  - 45
  - 46
  - 47
  - 48
  - 49
  - 50
  - 51
  - 52
  - 53
  - 54
  - 55
  - 56
  - 57
  - 58
  - 59
  - 60
30. Do DV, Schmidt-Erfurth U, Gonzalez VH, et al. The DA VINCI Study: phase 2 primary results of VEGF Trap-Eye in patients with diabetic macular edema. *Ophthalmology* 2011;118:1819-26.
31. Ahmadi H, Ramezani A, Shoeibi N, et al. Intravitreal bevacizumab with or without triamcinolone for refractory diabetic macular edema; a placebo-controlled, randomized clinical trial. *Graefes Arch Clin Exp Ophthalmol* 2008;246:483-9.
32. Gillies MC, Sutter FK, Simpson JM, et al. Intravitreal triamcinolone for refractory diabetic macular edema: two-year results of a double-masked, placebo-controlled, randomized clinical trial. *Ophthalmology* 2006;113:1533-8.
33. Gillies MC, McAllister IL, Zhu M, et al. Intravitreal triamcinolone prior to laser treatment of diabetic macular edema: 24-month results of a randomized controlled trial. *Ophthalmology* 2011;118:866-72.
34. Lam DS, Chan CK, Mohamed S, et al. Intravitreal triamcinolone plus sequential grid laser versus triamcinolone or laser alone for treating diabetic macular edema: six-month outcomes. *Ophthalmology* 2007;114:2162-7.
35. Lam DS, Lai TY, Lee VY, et al. Efficacy of 1.25 MG versus 2.5 MG intravitreal bevacizumab for diabetic macular edema: six-month results of a randomized controlled trial. *Retina* 2009;29:292-9.
36. Massin P, Bandello F, Garweg JG, et al. Safety and efficacy of ranibizumab in diabetic macular edema (RESOLVE Study): a 12-month, randomized, controlled, double-masked, multicenter phase II study. *Diabetes Care* 2010;33:2399-405.
37. Soheilian M, Ramezani A, Bijanzadeh B, et al. Intravitreal bevacizumab (avastin) injection alone or combined with triamcinolone versus macular photocoagulation as primary treatment of diabetic macular edema. *Retina* 2007;27:1187-95.
38. Nguyen QD, Brown DM, Marcus DM, et al. Ranibizumab for diabetic macular edema: results from 2 phase III randomized trials: RISE and RIDE. *Ophthalmology* 2012;119:789-801.
39. Cunningham ET, Jr., Adamis AP, Altaweel M, et al. A phase II randomized double-masked trial of pegaptanib, an anti-vascular endothelial growth factor aptamer, for diabetic macular edema. *Ophthalmology* 2005;112:1747-57.
40. Sultan MB, Zhou D, Loftus J, et al. A phase 2/3, multicenter, randomized, double-masked, 2-year trial of pegaptanib sodium for the treatment of diabetic macular edema. *Ophthalmology* 2011;118:1107-18.
41. Soheilian M, Ramezani A, Obudi A, et al. Randomized trial of intravitreal bevacizumab alone or combined with triamcinolone versus macular photocoagulation in diabetic macular edema. *Ophthalmology* 2009;116:1142-50.
42. Sivaprasad S, Ockrim Z, Massaoutis P, et al. Posterior hyaloid changes following intravitreal triamcinolone and macular laser for diffuse diabetic macular edema. *Retina* 2008;28:1435-42.
43. Pearson PA, Comstock TL, Ip M, et al. Fluocinolone acetonide intravitreal implant for diabetic macular edema: a 3-year multicenter, randomized, controlled clinical trial. *Ophthalmology* 2011;118:1580-7.

- 1  
2  
3 44. Callanan D, Gupta S, Ciulla TA, et al. Efficacy and safety of combination therapy with  
4 dexamethasone intravitreal implant (DEX Implant) plus laser photocoagulation versus  
5 monotherapy with laser for treatment of diffuse diabetic macular edema (DDME) [abstract].  
6 *Invest Ophthalmol Vis Sci* 22-4-2011;52:E-Abstract 3968.  
7
- 8 45. Kim Y, Kang S, Yi CH. Three-year follow-up of intravitreal triamcinolone acetonide injection  
9 and macular laser photocoagulation for diffuse diabetic macular edema [abstract]. *Invest*  
10 *Ophthalmol Vis Sci* 11-4-2010;51:E-Abstract 4260.  
11
- 12 46. Elman MJ, Bressler NM, Qin H, et al. Expanded 2-year follow-up of ranibizumab plus prompt  
13 or deferred laser or triamcinolone plus prompt laser for diabetic macular edema.  
14 *Ophthalmology* 2011;118:609-14.  
15
- 16 47. Nguyen QD, Shah SM, Heier JS, et al. Primary End Point (Six Months) Results of the  
17 Ranibizumab for Edema of the mAcula in diabetes (READ-2) study. *Ophthalmology*  
18 2009;116:2175-81.  
19
- 20 48. Ohji M, Ishibashi T, Sr., REVEAL study group. Efficacy and safety of ranibizumab 0.5 Mg as  
21 monotherapy or adjunctive to laser versus laser monotherapy in Asian patients with visual  
22 impairment due to diabetic macular edema: 12-month results of the REVEAL Study  
23 [abstract]. *Invest Ophthalmol Vis Sci* 26-3-2012;53:E-Abstract 4664.  
24
- 25 49. Mitchell P, RESTORE extension study group. 2-year safety and efficacy outcome of  
26 ranibizumab 0.5 mg in patients with visual impairment due to diabetic macular edema  
27 (DME): an interim analysis of the RESTORE extension study [abstract]. *Invest Ophthalmol Vis*  
28 *Sci* 26-3-2012;53:E-Abstract 4667.  
29
- 30 50. Do DV, Campochiaro PA, Boyer DS, et al. 6 month results of the READ 3 Study: Ranibizumab  
31 for Edema of the mAcula in Diabetes [abstract]. *Invest Ophthalmol Vis Sci* 26-3-2012;53:E-  
32 Abstract 5282.  
33
- 34 51. Jorge R, Nepomuceno AB, Takaki E, et al. A prospective randomized trial of intravitreal  
35 bevacizumab versus ranibizumab for the management of refractory diabetic macular edema  
36 [abstract]. *Invest Ophthalmol Vis Sci* 26-3-2012;53:E-Abstract 347.  
37
- 38 52. Michaelides M, Fraser-Bell S, Hamilton R, et al. Macular perfusion determined by fundus  
39 fluorescein angiography at the 4-month time point in a prospective randomized trial of  
40 intravitreal bevacizumab or laser therapy in the management of diabetic macular edema  
41 (Bolt Study): Report 1. *Retina* 2010;30:781-6.  
42
- 43 53. Faghihi H, Esfahani MR, Harandi ZA, et al. Intravitreal bevacizumab vs. combination of  
44 intravitreal bevacizumab plus macular photocoagulation in clinically significant diabetic  
45 macular edema: 6 months results of a randomized clinical trial. *Iranian J of Ophthalmol*  
46 2010;22:21-6.  
47
- 48 54. Soheilian M, Garfami KH, Ramezani A, et al. Two-year results of a randomized trial of  
49 intravitreal bevacizumab alone or combined with triamcinolone versus laser in diabetic  
50 macular edema. *Retina* 2012;32:314-21.  
51
- 52 55. Lim JW, Lee HK, Shin MC. Comparison of intravitreal bevacizumab alone or combined with  
53 triamcinolone versus triamcinolone in diabetic macular edema: a randomized clinical trial.  
54 *Ophthalmologica* 2012;227:100-6.  
55  
56  
57  
58  
59  
60

- 1  
2  
3 56. Oliveira Neto HL, Andrade RE, Casella M, et al. A randomized clinical trial to compare the  
4 efficacy and safety of isolated or combined intravitreal injection of triamcinolone acetonide  
5 and bevacizumab for diabetic macular edema ATAMD protocol - A Brazilian clinical trial  
6 [abstract]. *Invest Ophthalmol Vis Sci* 22-4-2011;52:E-Abstract 5331.  
7  
8  
9 57. Adamis AP, Altaweel M, Bressler NM, et al. Changes in retinal neovascularization after  
10 pegaptanib (Macugen) therapy in diabetic individuals. *Ophthalmology* 2006;113:23-8.  
11  
12 58. Do DV, Nguyen QD, Boyer D, et al. One-year outcomes of the DA VINCI Study of VEGF Trap-  
13 Eye in eyes with diabetic macular edema. *Ophthalmology* 24-4-2012.  
14  
15 59. Haller JA, Kuppermann BD, Blumenkranz MS, et al. Randomized controlled trial of an  
16 intravitreal dexamethasone drug delivery system in patients with diabetic macular edema.  
17 *Arch Ophthalmol* 2010;128:289-96.  
18  
19 60. Campochiaro PA, Brown DM, Pearson A, et al. Sustained delivery fluocinolone acetonide  
20 vitreous inserts provide benefit for at least 3 Years in patients with diabetic macular edema.  
21 *Ophthalmology* 21-6-2012.  
22  
23 61. Diabetic Retinopathy Clinical Research Network (DRCR.net), Beck RW, Edwards AR, et al.  
24 Three-year follow-up of a randomized trial comparing focal/grid photocoagulation and  
25 intravitreal triamcinolone for diabetic macular edema. *Arch Ophthalmol* 2009;127:245-51.  
26  
27 62. Ockrim ZK, Sivaprasad S, Falk S, et al. Intravitreal triamcinolone versus laser  
28 photocoagulation for persistent diabetic macular oedema. *Br J Ophthalmol* 2008;92:795-9.  
29  
30 63. Bressler NM, Edwards AR, Beck RW, et al. Exploratory analysis of diabetic retinopathy  
31 progression through 3 years in a randomized clinical trial that compares intravitreal  
32 triamcinolone acetonide with focal/grid photocoagulation. *Arch Ophthalmol* 2009;127:1566-  
33 71.  
34  
35 64. Diabetic Retinopathy Clinical Research Network. A randomized trial comparing intravitreal  
36 triamcinolone acetonide and focal/grid photocoagulation for diabetic macular edema.  
37 *Ophthalmology* 2008;115:1447-9.  
38  
39 65. Ford J, Elders A, Shyangdan D, et al. The relative clinical effectiveness of ranibizumab and  
40 bevacizumab in diabetic macular oedema: an indirect comparison. *BMJ* 2012;in press.  
41  
42 66. Chakravarthy U, Harding SP, Rogers CA, et al. Ranibizumab versus bevacizumab to treat  
43 neovascular age-related macular degeneration: one-year findings from the IVAN randomized  
44 trial. *Ophthalmology* 2012;119:1399-411.  
45  
46 67. Martin DF, Maguire MG, Fine SL, et al. Ranibizumab and bevacizumab for treatment of  
47 neovascular age-related macular degeneration: two-year results. *Ophthalmology*  
48 2012;119:1388-98.  
49  
50 68. Campbell RJ, Gill SS, Bronskill SE, et al. Adverse events with intravitreal injection of vascular  
51 endothelial growth factor inhibitors: nested case-control study. *BMJ* 2012;345:e4203.  
52  
53 69. Van der Reis MI, La Heij EC, De Jong-Hesse Y, et al. A systematic review of the adverse events  
54 of intravitreal anti-vascular endothelial growth factor injections. *Retina-the Journal of*  
55 *Retinal and Vitreous Diseases* 2011;31:1449-69.  
56  
57  
58  
59  
60

- 1  
2  
3 70. Fung AE, Rosenfeld PJ, Reichel E. The International Intravitreal Bevacizumab Safety Survey:  
4 using the internet to assess drug safety worldwide. *Br J Ophthalmol* 2006;90:1344-9.  
5  
6 71. Elbendary AM, Shahin MM. Intravitreal diclofenac versus intravitreal triamcinolone  
7 acetamide in the treatment of diabetic macular edema. *Retina* 2011;31:2058-64.  
8  
9 72. Sfikakis PP, Grigoropoulos V, Emfietzoglou I, et al. Infliximab for diabetic macular edema  
10 refractory to laser photocoagulation: a randomized, double-blind, placebo-controlled,  
11 crossover, 32-week study. *Diabetes Care* 2010;33:1523-8.  
12  
13 73. Keech AC, Mitchell P, Summanen PA, et al. Effect of fenofibrate on the need for laser  
14 treatment for diabetic retinopathy (FIELD study): a randomised controlled trial. *Lancet* 17-  
15 11-2007;370:1687-97.  
16  
17 74. PKC-DMES Study Group. Effect of ruboxistaurin in patients with diabetic macular edema:  
18 thirty-month results of the randomized PKC-DMES clinical trial. *Arch Ophthalmol*  
19 2007;125:318-24.  
20  
21 75. PKC-DMES Study Group. Effect of ruboxistaurin on visual loss in patients with diabetic  
22 retinopathy. *Ophthalmology* 2006;113:2221-30.  
23  
24 76. Fong DS, Strauber SF, Aiello LP, et al. Comparison of the modified Early Treatment Diabetic  
25 Retinopathy Study and mild macular grid laser photocoagulation strategies for diabetic  
26 macular edema. *Arch Ophthalmol* 2007;125:469-80.  
27  
28 77. Health Canada. Reports of eye inflammation, endophthalmitis, and Toxic Anterior Segment  
29 Syndrome (TASS) following off-label intravitreal use of Avastin (bevacizumab). 2008 [cited  
30 2012 Oct 24];Available from: URL: [http://www.hc-sc.gc.ca/dhp-mps/medeff/advisories-  
31 32 33 34 35 36 37 38 39 40 41 42 43 44 45 46 47 48 49 50 51 52 53 54 55 56 57 58 59 60](http://www.hc-sc.gc.ca/dhp-mps/medeff/advisories-avis/prof/2008/avastin_4_hpc-cps-eng.php)  
32 [http://www.hc-sc.gc.ca/dhp-mps/medeff/advisories-  
33 34 35 36 37 38 39 40 41 42 43 44 45 46 47 48 49 50 51 52 53 54 55 56 57 58 59 60](http://www.hc-sc.gc.ca/dhp-mps/medeff/advisories-avis/prof/2008/avastin_4_hpc-cps-eng.php)  
34 [avis/prof/2008/avastin\\_4\\_hpc-cps-eng.php](http://www.hc-sc.gc.ca/dhp-mps/medeff/advisories-avis/prof/2008/avastin_4_hpc-cps-eng.php)  
35  
36 78. Curtis LH, Hammill BG, Schulman KA, et al. Risks of mortality, myocardial infarction,  
37 bleeding, and stroke associated with therapies for age-related macular degeneration. *Arch*  
38 *Ophthalmol* 2010;128:1273-9.  
39  
40 79. Gower EW, Cassard S, Chu L, et al. Adverse event rates following intravitreal injection of  
41 Avastin or Lucentis for treating age-related macular degeneration [abstract]. *Invest*  
42 *Ophthalmol Vis Sci* 22-4-2011;52:E-Abstract 6644.  
43  
44 80. General Medical Council. Prescribing medicines for use outside the terms of their licence  
45 (off-label). 2012 [cited 2012 Oct 24];Available from: URL: [http://www.gmc-  
46 47 48 49 50 51 52 53 54 55 56 57 58 59 60](http://www.gmc-uk.org/guidance/ethical_guidance/prescriptions_faqs.asp#10)  
47 [http://www.gmc-  
48 49 50 51 52 53 54 55 56 57 58 59 60](http://www.gmc-uk.org/guidance/ethical_guidance/prescriptions_faqs.asp#10)  
48 [uk.org/guidance/ethical\\_guidance/prescriptions\\_faqs.asp#10](http://www.gmc-uk.org/guidance/ethical_guidance/prescriptions_faqs.asp#10)  
49  
50 81. U.S.Food and Drug Administration. Off-Label" and investigational use of marketed drugs,  
51 biologics, and medical devices - Information Sheet. 2011 [cited 2012 Oct 24];Available from:  
52 URL: <http://www.fda.gov/RegulatoryInformation/Guidances/ucm126486.htm>  
53  
54 82. Alimera Sciences. Alimera Sciences' ILUVIEN® Receives Marketing Authorization in France for  
55 the Treatment of Chronic Diabetic Macular Edema. 2012 [cited 2012 Oct 24];Available from:  
56 URL: <http://investor.alimerasciences.com/releasedetail.cfm?ReleaseID=692876>  
57  
58 83. Laidlaw DA. Vitrectomy for diabetic macular oedema. *Eye* 2008;22:1337-41.

- 1  
2  
3  
4  
5  
6  
7  
8  
9  
10  
11  
12  
13  
14  
15  
16  
17  
18  
19  
20  
21  
22  
23  
24  
25  
26  
27  
28  
29  
30  
31  
32  
33  
34  
35  
36  
37  
38  
39  
40  
41  
42  
43  
44  
45  
46  
47  
48  
49  
50  
51  
52  
53  
54  
55  
56  
57  
58  
59  
60
84. National Institute for Health and Clinical Excellence. Ranibizumab for the treatment of diabetic macular oedema:TA237. 2011 [cited 2012 Oct 24];Available from: URL: <http://publications.nice.org.uk/ranibizumab-for-the-treatment-of-diabetic-macular-oedema-ta237>
  85. Rajendram R, Fraser-Bell S, Kaines A, et al. A 2-Year Prospective Randomized Controlled Trial of Intravitreal Bevacizumab or Laser Therapy (BOLT) in the Management of Diabetic Macular Edema: 24-Month Data: Report 3. *Arch Ophthalmol* 9-4-2012.
  86. Sivaprasad S, Dorin G. Subthreshold diode laser micropulse photocoagulation for the treatment of diabetic macular edema. *Expert Review of Medical Devices* 2012;9:189-97.
  87. Cho WB, Moon JW, Kim HC. Intravitreal triamcinolone and bevacizumab as adjunctive treatments to panretinal photocoagulation in diabetic retinopathy. *Br J Ophthalmol* 2010;94:858-63.
  88. Googe J, Brucker AJ, Bressler NM, et al. Randomized trial evaluating short-term effects of intravitreal ranibizumab or triamcinolone acetonide on macular edema after focal/grid laser for diabetic macular edema in eyes also receiving panretinal photocoagulation. *Retina* 2011;31:1009-27.
  89. Faghihi H, Roohipoor R, Mohammadi SF, et al. Intravitreal bevacizumab versus combined bevacizumab-triamcinolone versus macular laser photocoagulation in diabetic macular edema. *Eur J Ophthalmol* 2008;18:941-8.
  90. Figueroa MS, Contreras I, Noval S. Surgical and anatomical outcomes of pars plana vitrectomy for diffuse nontractional diabetic macular edema. *Retina* 2008;28:420-6.
  91. Isaac DL, Abud MB, Frantz KA, et al. Comparing intravitreal triamcinolone acetonide and bevacizumab injections for the treatment of diabetic macular oedema: a randomized double-blind study. *Acta Ophthalmol* 2012;90:56-60.
  92. Paccola L, Costa RA, Folgosa MS, et al. Intravitreal triamcinolone versus bevacizumab for treatment of refractory diabetic macular oedema (IBEME study). *Br J Ophthalmol* 2008;92:76-80.
  93. Prager SG, Kriechbaum K, Mylonas G, et al. Comparison of intravitreally applied bevacizumab and triamcinolone on diabetic macular edema [abstract]. *Invest Ophthalmol Vis Sci* 11-4-2010;51:E-Abstract 4262.
  94. Ozturk BT, Kerimoglu H, Bozkurt B, et al. Comparison of intravitreal bevacizumab and ranibizumab treatment for diabetic macular edema. *J Ocul Pharmacol Ther* 2011;27:373-7.
  95. Marey HM, Ellakwa AF. Intravitreal bevacizumab alone or combined with triamcinolone acetonide as the primary treatment for diabetic macular edema. *Clin Ophthalmol* 2011;5:1011-6.
  96. Shahin MM, El-Lakkany RS. A prospective, randomized comparison of intravitreal triamcinolone acetonide versus intravitreal bevacizumab (avastin) in diffuse diabetic macular edema. *Middle East Afr J Ophthalmol* 2010;17:250-3.



- 1  
2  
3 97. Loftus JV, Sultan MB, Pleil AM, et al. Changes in vision- and health-related quality of life in  
4 patients with diabetic macular edema treated with pegaptanib sodium or sham.  
5 *Investigative Ophthalmology & Visual Science* 2011;52:7498-505.  
6  
7 98. Ferrone PJ, Jonisch J. Ranibizumab dose comparison for the treatment of diabetic macular  
8 edema [abstract]. *Invest Ophthalmol Vis Sci* 2011;52:E-Abstract 5333.  
9  
10 99. Solaiman KA, Diab MM, Abo-Elenin M. Intravitreal bevacizumab and/or macular  
11 photocoagulation as a primary treatment for diffuse diabetic macular edema. *Retina*  
12 2010;30:1638-45.  
13  
14 100. Diabetic Retinopathy Clinical Research Network, Scott IU, Edwards AR, et al. A phase II  
15 randomized clinical trial of intravitreal bevacizumab for diabetic macular edema.  
16 *Ophthalmology* 2007;114:1860-7.  
17  
18 101. Lee SJ, Kim ET, Moon YS. Intravitreal bevacizumab alone versus combined with macular  
19 photocoagulation in diabetic macular edema. *Korean J Ophthalmol* 2011;25:299-304.  
20  
21 102. Audren F, Lecleire-Collet A, Erginay A, et al. Intravitreal triamcinolone acetonide for diffuse  
22 diabetic macular edema: phase 2 trial comparing 4 mg vs 2 mg. *Am J Ophthalmol*  
23 2006;142:794-9.  
24  
25 103. Audren F, Erginay A, Haouchine B, et al. Intravitreal triamcinolone acetonide for diffuse  
26 diabetic macular oedema: 6-month results of a prospective controlled trial. *Acta Ophthalmol*  
27 *Scand* 2006;84:624-30.  
28  
29 104. Avitabile T, Longo A, Reibaldi A. Intravitreal triamcinolone compared with macular laser grid  
30 photocoagulation for the treatment of cystoid macular edema. *Am J Ophthalmol*  
31 2005;140:695-702.  
32  
33 105. Bandello F, Pognuz DR, Pirracchio A, et al. Intravitreal triamcinolone acetonide for florid  
34 proliferative diabetic retinopathy. *Graefes Arch Clin Exp Ophthalmol* 2004;42:1024-7.  
35  
36 106. Bonini MA, Jorge R, Barbosa JC, et al. Intravitreal injection versus sub-Tenon's infusion of  
37 triamcinolone acetonide for refractory diabetic macular edema: A randomized clinical trial.  
38 *Invest Ophthalmol Vis Sci* 2005;46:3845-9.  
39  
40 107. Cellini M, Pazzaglia A, Zamparini E, et al. Intravitreal vs. subtenon triamcinolone acetonide  
41 for the treatment of diabetic cystoid macular edema. *BMC Ophthalmol* 2008;8:5TN.  
42  
43 108. Cardillo JA, Melo LA, Jr., Costa RA, et al. Comparison of intravitreal versus posterior sub-  
44 Tenon's capsule injection of triamcinolone acetonide for diffuse diabetic macular edema.  
45 *Ophthalmology* 2005;112:1557-63.  
46  
47 109. Chung EJ, Freeman WR, Azen SP, et al. Comparison of combination posterior sub-tenon  
48 triamcinolone and modified grid laser treatment with intravitreal triamcinolone treatment in  
49 patients with diffuse diabetic macular edema. *Yonsei Medi J* 31-12-2008;49:955-64.  
50  
51 110. Dehghan MH, Ahmadi H, Ramezani A, et al. A randomized, placebo-controlled clinical trial  
52 of intravitreal triamcinolone for refractory diabetic macular edema. *Int Ophthalmol*  
53 2008;28:7-17.  
54  
55  
56  
57  
58  
59  
60

111. Diabetic Retinopathy Clinical Research Network, Chew E, Strauber S, et al. Randomized trial of peribulbar triamcinolone acetonide with and without focal photocoagulation for mild diabetic macular edema: a pilot study. *Ophthalmology* 2007;114:1190-6.
112. Gil AL, Azevedo MJ, Tomasetto GG, et al. Treatment of diffuse diabetic maculopathy with intravitreal triamcinolone and laser photocoagulation: randomized clinical trial with morphological and functional evaluation. *Arquivos Brasileiros de Oftalmologia* 2011;74:343-7.
113. Entezari M, Ahmadi H, Dehghan MH, et al. Posterior sub-tenon triamcinolone for refractory diabetic macular edema: a randomized clinical trial. *Eur J Ophthalmol* 2005;15:746-50.
114. Hauser D, Bukelman A, Pokroy R, et al. Intravitreal triamcinolone for diabetic macular edema: comparison of 1, 2, and 4 mg. *Retina* 2008;28:825-30.
115. Jonas JB, Kampeter BA, Harder B, et al. Intravitreal triamcinolone acetonide for diabetic macular edema: A prospective, randomized study. *J Ocul Pharmacol Ther* 2006;22:200-7.
116. Jousseaume AM, Weiss C, Bauer D, et al. Triamcinolone versus inner-limiting membrane peeling in persistent diabetic macular edema (TIME study): design issues and implications. *Graefes Arch Clin Exp Ophthalmol* 2007;245:1781-7.
117. Kaderli B, Avci R. Comparison of topical and subconjunctival anesthesia in intravitreal injection administrations. *Eur J Ophthalmol* 2006;16:718-21.
118. Kang SW, Sa HS, Cho HY, et al. Macular grid photocoagulation after intravitreal triamcinolone acetonide for diffuse diabetic macular edema. *Arch Ophthalmol* 2006;124:653-8.
119. Kim JE, Pollack JS, Miller DG, et al. ISIS-DME: a prospective, randomized, dose-escalation intravitreal steroid injection study for refractory diabetic macular edema. *Retina* 2008;28:735-40.
120. Lam DS, Chan CK, Mohamed S, et al. A prospective randomised trial of different doses of intravitreal triamcinolone for diabetic macular oedema. *Br J Ophthalmol* 2007;91:199-203.
121. Lee HY, Lee SY, Park JS. Comparison of photocoagulation with combined intravitreal triamcinolone for diabetic macular edema. *Korean J Ophthalmol* 2009;23:153-8.
122. Maia OO, Jr., Takahashi BS, Costa RA, et al. Combined laser and intravitreal triamcinolone for proliferative diabetic retinopathy and macular edema: one-year results of a randomized clinical trial. *Am J Ophthalmol* 2009;147:291-7.
123. Massin P, Audren F, Haouchine B, et al. Intravitreal triamcinolone acetonide for diabetic diffuse macular edema: preliminary results of a prospective controlled trial. *Ophthalmology* 2004;111:218-24.
124. Mohamed S, Leung GM, Chan CK, et al. Factors associated with variability in response of diabetic macular oedema after intravitreal triamcinolone. *Clin Experiment Ophthalmol* 2009;37:602-8.



- 1  
2  
3 125. Nakamura A, Shimada Y, Horio N, et al. Vitrectomy for diabetic macular edema with  
4 posterior subtenon injection of triamcinolone acetonide. [Japanese]. *Folia Ophthalmol*  
5 *Japonica* 2004;55:958-62.  
6  
7 126. Spandau UH, Derse M, Schmitz-Valckenberg P, et al. Dosage dependency of intravitreal  
8 triamcinolone acetonide as treatment for diabetic macular oedema. *Br J Ophthalmol*  
9 2005;89:999-1003.  
10  
11 127. Tunc M, Onder HI, Kaya M. Posterior sub-Tenon's capsule triamcinolone injection combined  
12 with focal laser photocoagulation for diabetic macular edema. *Ophthalmology*  
13 2005;112:1086-91.  
14  
15 128. Verma LK, Vivek MB, Kumar A, et al. A prospective controlled trial to evaluate the adjunctive  
16 role of posterior subtenon triamcinolone in the treatment of diffuse diabetic macular  
17 edema. *J Ocul Pharmacol Ther* 2004;20:277-84.  
18  
19 129. Wickremasinghe SS, Rogers SL, Gillies MC, et al. Retinal vascular caliber changes after  
20 intravitreal triamcinolone treatment for diabetic macular edema. *Invest Ophthalmol Vis Sci*  
21 2008;49:4707-11.  
22  
23 130. Yalcinbayir O, Geliskan O, Kaderli B, et al. Intravitreal versus sub-Tenon posterior  
24 triamcinolone injection in bilateral diffuse diabetic macular edema. *Ophthalmologica*  
25 2011;225:222-7.  
26  
27 131. Haller JA, Bandello F, Belfort R, Jr., et al. Randomized, sham-controlled trial of  
28 dexamethasone intravitreal implant in patients with macular edema due to retinal vein  
29 occlusion. *Ophthalmology* 2010;117:1134-46.  
30  
31 132. Haller JA, Dugel P, Weinberg DV, et al. Evaluation of the safety and performance of an  
32 applicator for a novel intravitreal dexamethasone drug delivery system for the treatment of  
33 macular edema. *Retina* 2009;29:46-51.  
34  
35 133. Kuppermann BD, Blumenkranz MS, Haller JA, et al. Randomized controlled study of an  
36 intravitreal dexamethasone drug delivery system in patients with persistent macular  
37 edema. *Arch Ophthalmol* 2007;125:309-17.  
38  
39 134. Boyer DS, Faber D, Gupta S, et al. Dexamethasone intravitreal implant for treatment of  
40 diabetic macular edema in vitrectomized patients. *Retina* 2011;31:915-23.  
41  
42 135. Campochiaro PA, Hafiz G, Shah SM, et al. Sustained ocular delivery of fluocinolone acetonide  
43 by an intravitreal insert. *Ophthalmology* 2010;117:1393-9.  
44  
45 136. Gillies MC, Islam FM, Zhu M, et al. Efficacy and safety of multiple intravitreal triamcinolone  
46 injections for refractory diabetic macular oedema. *Br J Ophthalmol* 2007;91:1323-6.  
47  
48 137. Gillies MC, Simpson JM, Gaston C, et al. Five-year results of a randomized trial with open-  
49 label extension of triamcinolone acetonide for refractory diabetic macular edema.  
50 *Ophthalmology* 2009;116:2182-7.  
51  
52 138. Sutter FK, Simpson JM, Gillies MC. Intravitreal triamcinolone for diabetic macular edema  
53 that persists after laser treatment: three-month efficacy and safety results of a **prospective,**  
54 randomized, double-masked, placebo-controlled clinical trial. *Ophthalmology*  
55 2004;111:2044-9.  
56  
57  
58  
59  
60

- 1  
2  
3 139. Brown DM, Nguyen QD, Rubio RG, et al. Ranibizumab for Diabetic Macular Edema (DME):  
4 24-Month Efficacy and Safety Results of RISE - a Phase 3 Randomized Controlled Trial  
5 [abstract]. *Invest Ophthalmol Vis Sci* 22-4-2011;52:E-Abstract 6647.  
6  
7 140. Boyer D, Sy J, Rundle AC, et al. Ranibizumab (Anti-VEGF) for vision loss due to diabetic  
8 macular edema - results of two phase III randomized trials [abstract]. *71st Scientific*  
9 *Sessions June 24 - 28, 2011, San Diego Convention Center - San Diego, California*  
10 2011;Abstract No, 133-LBOR.  
11  
12 141. Soheilian M, Ramezani A, Yaseri M, et al. Initial macular thickness and response to  
13 treatment in diabetic macular edema. *Retina* 2011;31:1564-73.  
14  
15  
16  
17  
18  
19  
20  
21  
22  
23  
24  
25  
26  
27  
28  
29  
30  
31  
32  
33  
34  
35  
36  
37  
38  
39  
40  
41  
42  
43  
44  
45  
46  
47  
48  
49  
50  
51  
52  
53  
54  
55  
56  
57  
58  
59  
60

**Appendix 1: Methods of the literature search****Searches for clinical trials**

*Ovid MEDLINE 1948-July week 2, 2012 and Ovid MEDLINE(R) In-Process & Other Non-Indexed Citations July 11, 2012*

1. Diabetic Retinopathy/dt [Drug Therapy]
2. Macular Edema/dt [Drug Therapy]
3. (diabet\* adj2 macular adj (edema or oedema)).tw.
4. (diabet\* adj2 maculopathy).tw.
5. (diabet\* adj2 retinopathy).tw.
6. 1 or 2 or 3 or 4 or 5
7. (ranibizumab or lucentis or bevacizumab or avastin or pegaptanib or macugen or aflibercept or vegf trap-eye or steroid\* or corticosteroid\* or dexamethasone or fluocinolone or triamcinolone or anti-VEGF\* or anti-vascular endothelial growth factor\*).tw.
8. exp Vascular Endothelial Growth Factor A/
9. exp Fluocinolone Acetonide/
10. exp Triamcinolone/
11. 7 or 8 or 9 or 10
12. 6 and 11
13. randomized controlled trial.pt.
14. controlled clinical trial.pt.
15. (masked or sham or placebo or control group or random\*).tw.
16. 13 or 14 or 15
17. 12 and 16
18. (case reports or editorial or letter or review).pt.
19. 17 not 18
20. limit 19 to humans

*Embase 1947 to 2012 Week 27*

1. (ranibizumab or lucentis or bevacizumab or avastin or pegaptanib or macugen or aflibercept or vegf trap-eye or dexamethasone or fluocinolone or triamcinolone or anti-VEGF\* or anti-vascular endothelial growth factor\*).m\_titl.
2. (diabetic macular edema or diabetic macular oedema or diabetic retinopathy or diabetic maculopathy).m\_titl.
3. 1 and 2
4. random\*.tw.
5. 3 and 4

35

1  
2  
3  
4  
5  
6  
7  
8  
9  
10  
11  
12  
13  
14  
15  
16  
17  
18  
19  
20  
21  
22  
23  
24  
25  
26  
27  
28  
29  
30  
31  
32  
33  
34  
35  
36  
37  
38  
39  
40  
41  
42  
43  
44  
45  
46  
47  
48  
49  
50  
51  
52  
53  
54  
55  
56  
57  
58  
59  
60

*Cochrane Central Register of Controlled Trials, Issue 7 of 12, July 2012*

ranibizumab or lucentis or bevacizumab or avastin or pegaptanib or macugen or aflibercept or vegf trap-eye or steroid\* or corticosteroid\* or dexamethasone or fluocinolone or triamcinolone or anti-VEGF\* or anti-vascular endothelial growth factor\* in Record Title and diabetic macular edema or diabetic macular oedema or diabetic retinopathy or diabetic maculopathy in Record Title

*Web of Science® – with Conference Proceedings (updated 2012-07-12)*

Title=(ranibizumab or lucentis or bevacizumab or avastin or pegaptanib or macugen or aflibercept or vegf trap-eye or steroid\* or corticosteroid\* or dexamethasone or fluocinolone or triamcinolone or anti-VEGF\* or anti-vascular endothelial growth factor\*) AND Title=(diabetic macular edema or diabetic macular oedema or diabetic retinopathy or diabetic maculopathy) AND Title=(random\*)

### Searches for systematic reviews

*Ovid MEDLINE(R) Daily Update July 11, 2012, Ovid MEDLINE(R) In-Process & Other Non-Indexed Citations July 11, 2012*

1. Diabetic Retinopathy/dt [Drug Therapy]
2. Macular Edema/dt [Drug Therapy]
3. (diabet\* adj2 macular adj (edema or oedema)).tw.
4. (diabet\* adj2 maculopathy).tw.
5. (diabet\* adj2 retinopathy).tw.
6. 1 or 2 or 3 or 4 or 5
7. (ranibizumab or lucentis or bevacizumab or avastin or pegaptanib or macugen or aflibercept or vegf trap-eye or steroid\* or corticosteroid\* or dexamethasone or fluocinolone or triamcinolone or anti-VEGF\* or anti-vascular endothelial growth factor\*).tw.
8. exp Vascular Endothelial Growth Factor A/
9. exp Fluocinolone Acetonide/
10. exp Triamcinolone/
11. 7 or 8 or 9 or 10
12. 6 and 11
13. (systematic review or meta-analysis or pubmed or medline).tw.
14. meta-analysis.pt.
15. cochrane.af.
16. 13 or 14 or 15
17. 12 and 16

1  
2  
3 *Cochrane Database of Systematic Reviews and Technology Assessments Database, Cochrane Library*  
4 *July Issue, 2012*

5  
6 "ranibizumab or lucentis or bevacizumab or avastin or pegaptanib or macugen or aflibercept or vegf  
7 trap-eye or steroid\* or corticosteroid\* or dexamethasone or fluocinolone or triamcinolone or anti-  
8 VEGF\* or anti-vascular endothelial growth factor\* in Record Title and diabetic macular edema or  
9 diabetic macular oedema or diabetic retinopathy or diabetic maculopathy in Record Title  
10  
11

#### 12 13 14 **Searches for safety and adverse events**

15  
16 *Ovid MEDLINE(R) Daily Update July 11, 2012, Ovid MEDLINE(R) In-Process & Other Non-*  
17 *Indexed Citations July 11, 2012 ; Embase 1980to 2012 week 27*  
18

- 19  
20 1. (ranibizumab or lucentis or bevacizumab or avastin or pegaptanib or aflibercept or vegf trap-eye  
21 or macugen or dexamethasone or fluocinolone or triamcinolone or anti-VEGF\* or anti-vascular  
22 endothelial growth factor\*).m\_titl.
- 23  
24 2. (diabetic macular edema or diabetic macular oedema or diabetic retinopathy or diabetic  
25 maculopathy).m\_titl.
- 26  
27 3. 1 and 2
- 28  
29 4. (risk or safety or adverse or harm or pharmacovigilance).tw.
- 30  
31 5. (side-effect\* or precaution\* or warning\* or contraindication\$ or contra-indication\* or tolerability  
32 or toxic\*).tw.
- 33  
34 6. 4 or 5
- 35  
36 7. 3 and 6

#### 37 38 **Searches of the annual meeting abstracts (for trials, reviews and safety studies)**

- 39  
40 • ARVO (Association for Research in Vision and Ophthalmology) (2002 to 2012)
- 41  
42 • ADA (American Diabetes Association) (2002-2012)
- 43  
44 • EASD (European Association for the Study of Diabetes) (2002-2012)

#### 45 46 **Other searches**

47  
48 *Web sites of the following*

- 49  
50 • Drugs@FDA: FDA Approved Drug Products
- 51  
52 • European Medicines Association
- 53  
54 • ClinicalTrials.gov
- 55  
56 • EU Clinical Trials Register

57  
58 National Institute for Health and Clinical Excellence  
59  
60

**Appendix 2: Ongoing Trials in ClinicalTrials.gov**

- Schmidt-Erfurth and colleagues are comparing ranibizumab and bevacizumab in DME (NCT00545870)
- TRIASTIN study is comparing ranibizumab, triamcinolone and sham injection (NCT00682539)
- Maturi and colleagues are comparing bevacizumab plus dexamethasone with bevacizumab alone (NCT01309451)
- IBeTA study (Jorge and colleagues) is comparing bevacizumab (1.5mg) plus laser, triamcinolone (4mg) plus laser with laser alone (NCT00997191)
- Chaudhry and colleagues are evaluating ranibizumab in patients who have failed with 3-6 injections of bevacizumab (NCT01253694)
- MIDME study (Pfizer) is comparing pegaptanib 0.3mg with sham injection. NCT01175070
- Figueira and colleagues are comparing pegaptanib plus laser with laser alone (NCT01281098)
- RESPOND (Novartis) is comparing ranibizumab (0.5mg) alone with ranibizumab plus laser or laser alone (NCT01135914)
- RETAIN (Novartis) study is comparing two different ranibizumab algorithms; “treat and extend” versus as needed (NCT01171976)
- RED-ES (Novartis) is comparing ranibizumab with laser in patients with visual impairment due to DME (NCT00901186)
- READ 3 study (Do and colleagues) are comparing two doses of ranibizumab 0.5 mg and 2 mg (NCT01077401)
- VIVID-DME and VISTA DME studies (Bayer) are comparing aflibercept with laser. (NCT01331681 and NCT01363440)
- Gillies and colleagues are comparing bevacizumab with dexamethasone (NCT01298076)
- Soheilian and colleagues are performing a phase I study looking at the use of diclofenac compared with bevacizumab in DME (NCT00999791)
- López-Miranda and colleagues are comparing the use of bevacizumab before and after laser therapy (NCT00804206)
- NEVANAC study is comparing triamcinolone alone with triamcinolone plus nepafenac (NSAID) (NCT00780780)
- Elman and colleagues are comparing laser alone, laser combined with an intravitreal injection of triamcinolone, laser combined with an intravitreal injection of ranibizumab, or intravitreal injection of ranibizumab alone (NCT00444600)
- BRDME (Schlingemann and colleagues) study is comparing the use of bevacizumab and ranibizumab in the treatment of patients with DME (OCT central area thickness > 275 µm) (NCT01635790)
- Wiley and colleagues are comparing bevacizumab and ranibizumab in patients with DME in at least one eye (NCT01610557)
- Protocol T study (Wells and colleagues) is comparing effectiveness of aflibercept, bevacizumab, and ranibizumab for DME (NCT01627249)
- Allergan funded study comparing safety and efficacy of 700 µg dexamethasone implant against 0.5 mg ranibizumab in patients with DME (NCT01492400)
- Pfizer funded study comparing effectiveness of 0.3 mg pegaptanib against sham injection (NCT01100307)

1  
2  
3  
4  
5  
6  
7  
8  
9  
10  
11  
12  
13  
14  
15  
16  
17  
18  
19  
20  
21  
22  
23  
24  
25  
26  
27  
28  
29  
30  
31  
32  
33  
34  
35  
36  
37  
38  
39  
40  
41  
42  
43  
44  
45  
46  
47  
48  
49  
50  
51  
52  
53  
54  
55  
56  
57  
58  
59  
60

- Allergan funded study comparing safety and efficacy of an intravitreal dexamethasone implant (700 µg and 350 µg) against sham in patients with DME (NCT00168389)
- Allergan funded study comparing safety and efficacy of an intravitreal dexamethasone implant (700 µg and 350 µg) against sham in patients with DME (NCT00168337)

For peer review only

Figure 1 - PRISMA

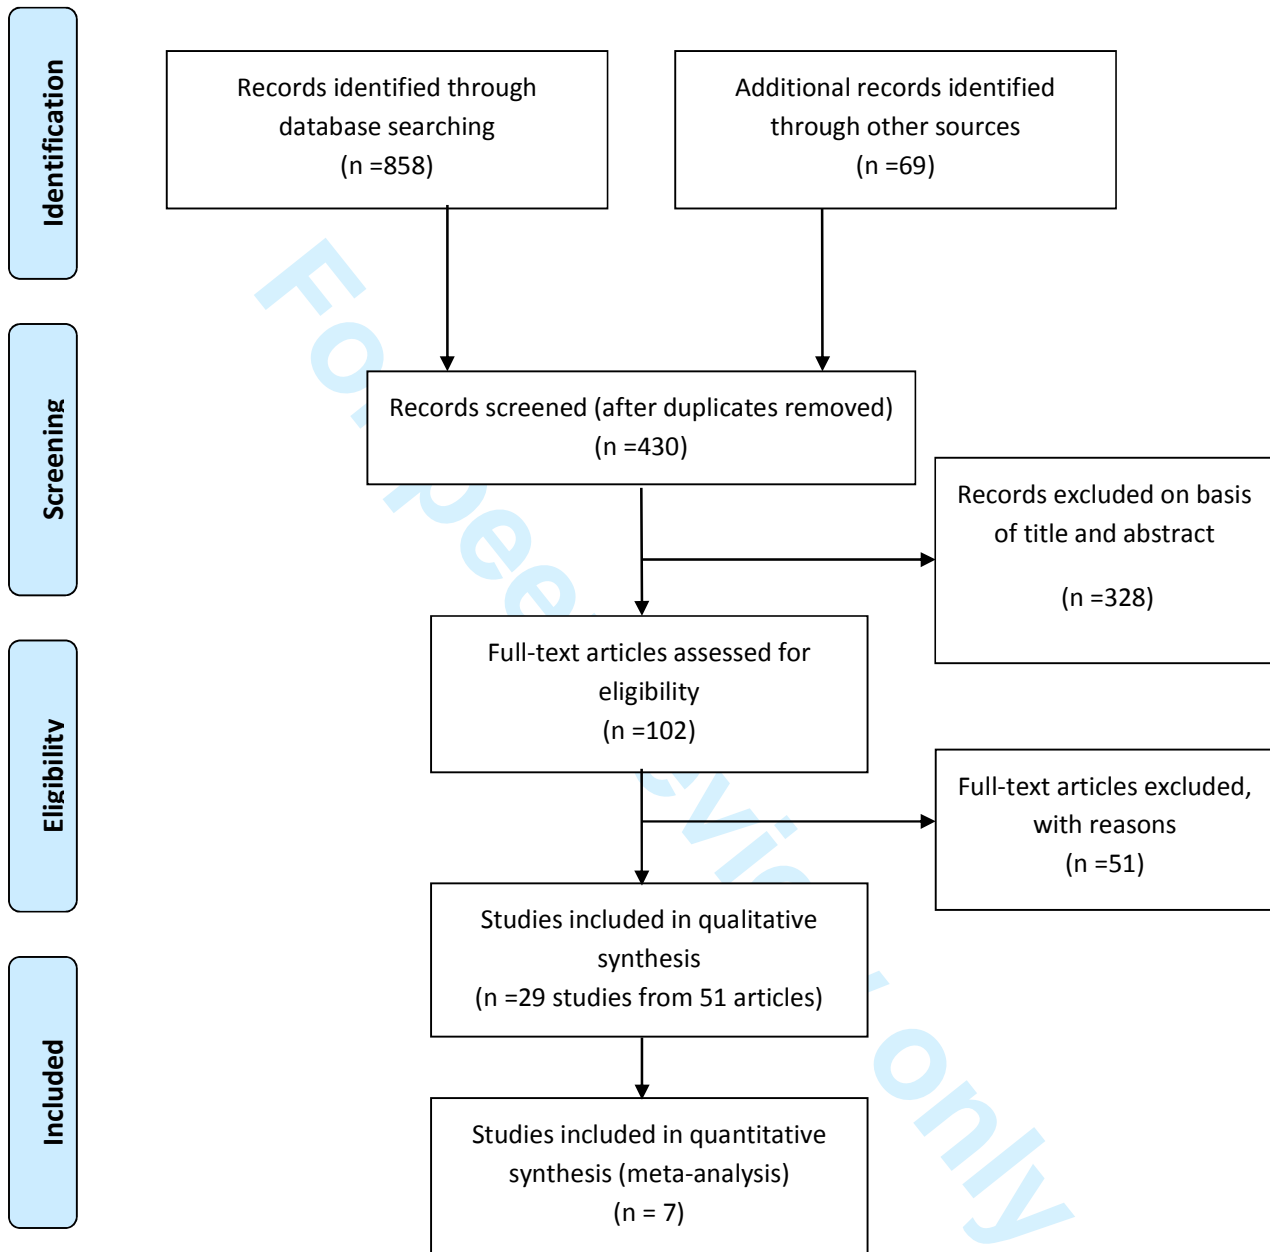



Figure 2 Ranibizumab 0.5mg alone versus laser alone

2.1 Mean change in BCVA

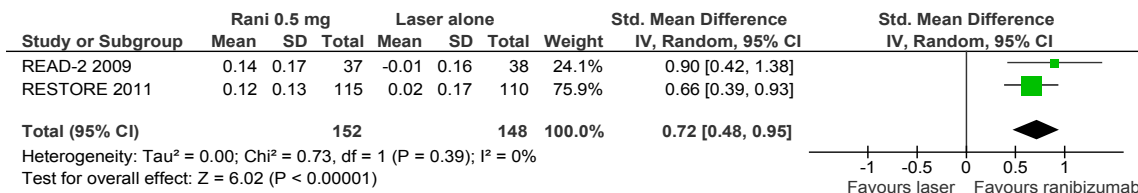

2.2 Proportion with >15 letter gain

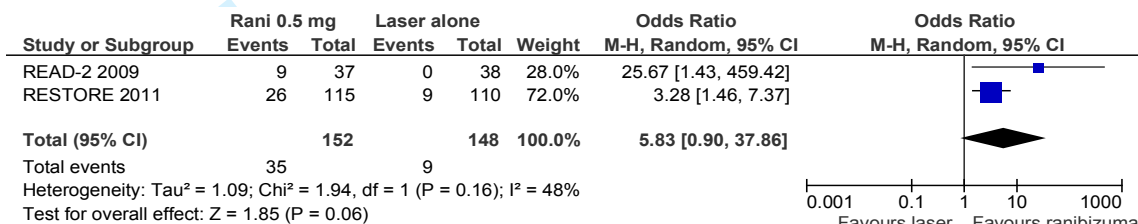

2.3 CMT

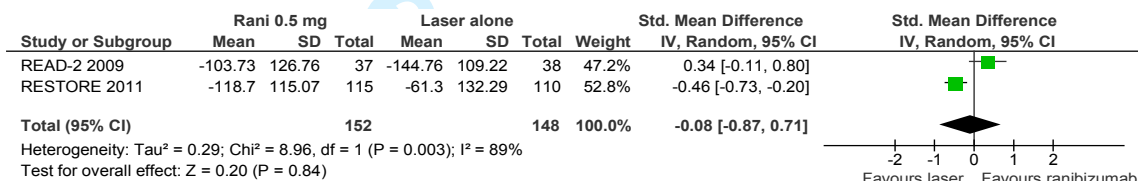

Figure 3 Ranibizumab 0.5mg plus laser versus ranibizumab 0.5mg alone

3.1 Mean change in BCVA

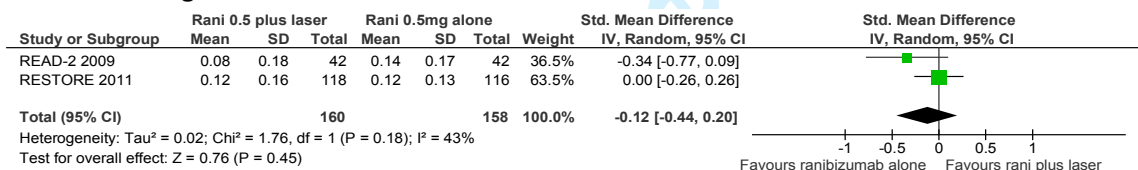

3.2 Proportion with >15 letter gain

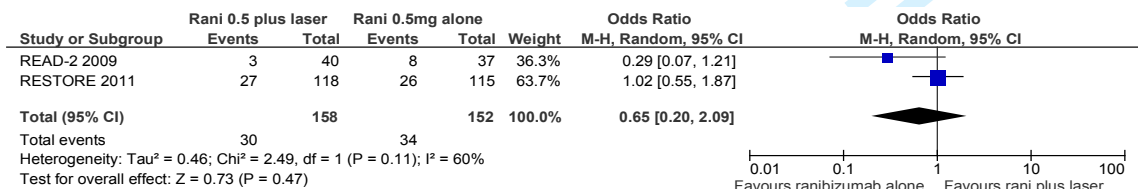

3.3 CMT

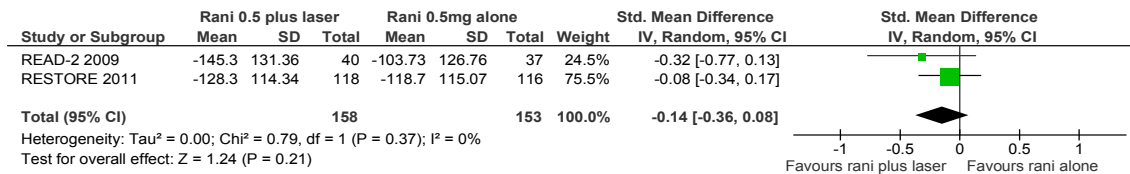

Figure 4 Ranibizumab 0.5mg plus laser versus laser alone

4.1 Mean change in BCVA



4.2 Proportion with >15 letter gain



4.3 CMT



Figure 5 Pegaptanib 0.3mg versus sham injection

5.1 Proportion with >15 letter gain



**Figure 6 Triamcinolone 4mg versus laser alone**

**6.1 Mean change in BCVA**

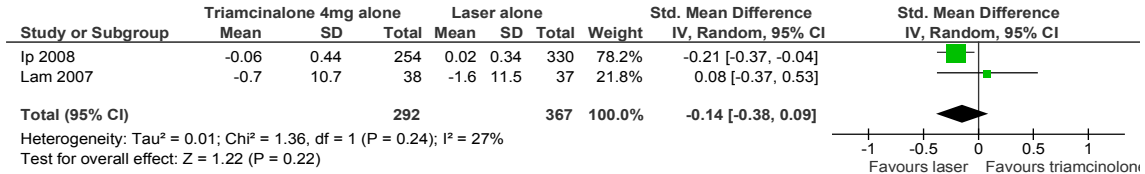

**6.2 Proportion with >15 letter gain**



**Figure 7 Triamcinolone 4mg plus laser versus laser alone**

**7.1 Mean change in BCVA**



**7.2 Proportion with >15 letter gain**

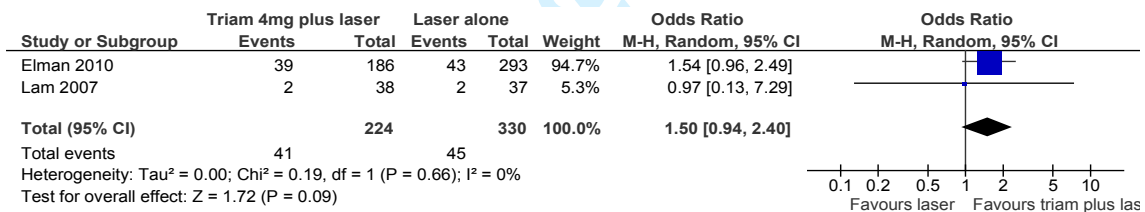

**Table 1: List of excluded studies**

| Study                           | Reason                          |
|---------------------------------|---------------------------------|
| <b>Active comparator trials</b> |                                 |
| Cho 2010[87]                    | Single dose                     |
| DRCRN 2010 (Googe 2010)[88]     | <6 mths f/u                     |
| Faghihi 2008[89]                | Single dose                     |
| Figueroa 2008[90]               | Single dose                     |
| Isaac 2012[91]                  | Single dose                     |
| Paccola 2008[92]                | Single dose                     |
| Prager 2011[93]                 | <25 pts per arm                 |
| Ozturk 2011[94]                 | Non-RCT                         |
| Marey 2011[95]                  | <6 mths                         |
| Shahin 2010[96]                 | Single dose                     |
| <b>Pegaptanib</b>               |                                 |
| Loftus 2011[97]                 | Quality of life data.           |
| <b>Ranibizumab</b>              |                                 |
| Ferrone 2011[98]                | <25 pts per arm                 |
| <b>Bevacizumab</b>              |                                 |
| Solaiman 2010[99]               | Single dose                     |
| DRCRN –Scott 2007[100]          | <25 pts per arm                 |
| Lee 2011[101]                   | Non-RCT                         |
| Isaac 2012[91]                  | Single dose                     |
| <b>Trimacinolone</b>            |                                 |
| Audren 2006a[102]               | Single dose (dosing study)      |
| Audren 2006b[103]               | Single dose                     |
| Avitabile 2005[104]             | Mixed RVO and DMO               |
| Bandello 2004[105]              | Case report + PDR               |
| Bonini 2005[106]                | Single dose injection technique |
| Cellini 2008[107]               | Single injection PSTI           |
| Cardillo 2005[108]              | Single injection PSTI           |
| Chung 2008[109]                 | Single injection PSTI           |
| Dehghan 2008[110]               | Single dose                     |
| DRCRN -Chew 2007[111]           | <25 pts per arm                 |
| Gil 2011[112]                   | <25 pts per arm                 |
| Entezari 2005[113]              | <6 months                       |
| Hauser 2008[114]                | Single dose                     |
| Jonas 2006[115]                 | Single dose                     |
| Joussen 2007[116]               | Study protocol                  |
| Avci 2006[117]                  | Anaesthetic technique           |
| Kang 2006[118]                  | Single dose                     |
| Kim 2008[119]                   | Single injection and CME        |
| Lam 2007b[120]                  | Single injection                |
| Lee 2009[121]                   | Single injection                |
| Maia 2009[122]                  | Single dose                     |
| Massin 2004[123]                | Single dose                     |
| Mohamed 2009[124]               | Post-hoc analysis               |
| Nakamura 2004[125]              | Single dose                     |
| Spandau 2005[126]               | Single dose                     |
| Tunc 2005[127]                  | <6 months                       |

|    |                          |                                  |
|----|--------------------------|----------------------------------|
| 1  |                          |                                  |
| 2  |                          |                                  |
| 3  | Verma 2004[128]          | Single dose                      |
| 4  | Wickremasinghe 2008[129] | Single dose                      |
| 5  | Yalcinbayir 2011[130]    | Single dose                      |
| 6  | <b>Dexamethasone</b>     |                                  |
| 7  | Haller 2010[131]         | <6 months                        |
| 8  | Haller 2009[132]         | <25pts per arm                   |
| 9  | Kuppermann 2007 [133]    | Mixture of macular oedema causes |
| 10 | Boyer 2011[134]          | Non-randomised                   |
| 11 | <b>Fluocinolone</b>      |                                  |
| 12 | Campochiaro 2010[135]    | <25pts per arm                   |
| 13 | <b>Diclofenac</b>        |                                  |
| 14 | Elbendary 2011 [71]      | <35pts per arm                   |
| 15 |                          |                                  |
| 16 |                          |                                  |
| 17 |                          |                                  |
| 18 |                          |                                  |
| 19 |                          |                                  |
| 20 |                          |                                  |
| 21 |                          |                                  |
| 22 |                          |                                  |
| 23 |                          |                                  |
| 24 |                          |                                  |
| 25 |                          |                                  |
| 26 |                          |                                  |
| 27 |                          |                                  |
| 28 |                          |                                  |
| 29 |                          |                                  |
| 30 |                          |                                  |
| 31 |                          |                                  |
| 32 |                          |                                  |
| 33 |                          |                                  |
| 34 |                          |                                  |
| 35 |                          |                                  |
| 36 |                          |                                  |
| 37 |                          |                                  |
| 38 |                          |                                  |
| 39 |                          |                                  |
| 40 |                          |                                  |
| 41 |                          |                                  |
| 42 |                          |                                  |
| 43 |                          |                                  |
| 44 |                          |                                  |
| 45 |                          |                                  |
| 46 |                          |                                  |
| 47 |                          |                                  |
| 48 |                          |                                  |
| 49 |                          |                                  |
| 50 |                          |                                  |
| 51 |                          |                                  |
| 52 |                          |                                  |
| 53 |                          |                                  |
| 54 |                          |                                  |
| 55 |                          |                                  |
| 56 |                          |                                  |
| 57 |                          |                                  |
| 58 |                          |                                  |
| 59 |                          |                                  |
| 60 |                          |                                  |

Table 2: Study quality

| Study (author and year)              | Adequate sequence generation | Allocation concealment | Masking                                                                   | Incomplete outcome data addressed                                              | Free of selective reporting | Free of other bias (e.g. similarity at baseline, power assessment)                                                                                                       | Funder                                                              |
|--------------------------------------|------------------------------|------------------------|---------------------------------------------------------------------------|--------------------------------------------------------------------------------|-----------------------------|--------------------------------------------------------------------------------------------------------------------------------------------------------------------------|---------------------------------------------------------------------|
| <b>Anti-VEGFs</b>                    |                              |                        |                                                                           |                                                                                |                             |                                                                                                                                                                          |                                                                     |
| <b>Ranibizumab</b>                   |                              |                        |                                                                           |                                                                                |                             |                                                                                                                                                                          |                                                                     |
| READ-2 Study [28,47]                 | Unclear                      | Unclear                | Unclear                                                                   | Yes (91.3% completion)                                                         | Yes                         | Comparison groups similar at baseline; power analysis not mentioned                                                                                                      | Juvenile Diabetes Research Foundation, Genentech Inc.               |
| RESOLVE Study (Massin 2010)[36]      | Yes                          | Yes                    | Yes (patients and outcome assessors)                                      | Yes (82% completion in sham arm, 90.2% with ranibizumab)                       | Yes                         | Comparison groups similar at baseline; power analysis unclear                                                                                                            | Novartis Pharma, Switzerland                                        |
| RESTORE Study (Mitchell 2011)[24]    | Yes                          | Unclear                | Yes (patients, outcome assessors)                                         | Yes (87.3 to 88.3% completion)                                                 | Yes                         | Comparison groups similar at baseline; power analysis carried out (power adequate for VA changes)                                                                        | Novartis Pharma, Switzerland                                        |
| RISE and RIDE (Nguyen 2012)[38]      | Yes                          | Yes                    | Yes (patients, treating physician masked to assigned dose of ranibizumab) | Yes (2 year study completed by 83.3% of patients in RISE and by 84.6% in RIDE) | Yes                         | Comparison groups similar at baseline; ITT analysis; power analysis carried out (power adequate for primary endpoint)                                                    | Genentech Inc.                                                      |
| <b>Bevacizumab</b>                   |                              |                        |                                                                           |                                                                                |                             |                                                                                                                                                                          |                                                                     |
| BOLT Study (Michaelides 2010)[23,52] | Yes                          | Unclear                | Partial (outcome assessors, not patients)                                 | Yes (97.5% completion)                                                         | Yes                         | Comparison groups similar at baseline (except laser group had longer duration of clinically significant DMO); power analysis carried out (power adequate for VA changes) | Moorfields Special Trustees, National Institute for Health Research |
| Faghihi 2010[53]                     | Yes                          | Unclear                | Yes (patient)                                                             | Yes (100% completion)                                                          | Yes                         | Comparable groups at baseline                                                                                                                                            | Not specified                                                       |

| Study (author and year)              | Adequate sequence generation                 | Allocation concealment | Masking                                                         | Incomplete outcome data addressed | Free of selective reporting | Free of other bias (e.g. similarity at baseline, power assessment)                                                          | Funder                                                                          |
|--------------------------------------|----------------------------------------------|------------------------|-----------------------------------------------------------------|-----------------------------------|-----------------------------|-----------------------------------------------------------------------------------------------------------------------------|---------------------------------------------------------------------------------|
| Lam 2009[35]                         | Yes                                          | Yes                    | Yes (patients and technicians assessing BCVA, OCT and IOP)      | Yes (92.3% follow-up at 6 months) | Yes                         | Comparison groups similar at baseline; power analysis carried out (power adequate for CMT changes)                          | supported in part by the Action for Vision Eye Foundation Hong Kong (charity)   |
| <b>Pegaptanib</b>                    |                                              |                        |                                                                 |                                   |                             |                                                                                                                             |                                                                                 |
| Cunningham 2005 / Adamis 2006[39,57] | Yes                                          | Unclear                | Yes (patients and outcome assessors)                            | Yes (95% completion)              | Yes                         | Comparison groups similar at baseline; acknowledge lack of power to detect differences between doses of pegaptanib          | Eyetech Pharmaceuticals Inc., New York, and Pfizer Inc., New York               |
| Sultan 2011[40]                      | Yes                                          | Unclear                | Yes (patients and outcome assessors)                            | Yes (69.9 to 73.8% completion)    | Yes                         | Comparison groups similar at baseline; power analysis carried out (power adequate for VA changes)                           | Pfizer Inc., New York                                                           |
| <b>Aflibercept</b>                   |                                              |                        |                                                                 |                                   |                             |                                                                                                                             |                                                                                 |
| Da Vinci 2010 [30,58]                | Unclear (predetermined randomization scheme) | Unclear                | Yes (patients)                                                  | Yes (85% completion)              | Yes                         | Comparison groups similar at baseline, power calculation completed                                                          | Regeneron Pharmaceuticals, Inc., New York                                       |
| <b>Steroids</b>                      |                                              |                        |                                                                 |                                   |                             |                                                                                                                             |                                                                                 |
| <b>Dexamethasone</b>                 |                                              |                        |                                                                 |                                   |                             |                                                                                                                             |                                                                                 |
| Haller 2010[59]                      | Yes                                          | Unclear                | Yes (patients to dexamethasone dose, outcome assessors)         | Yes (92% completion)              | Yes                         | Comparison groups similar at baseline; power analysis carried out, but study not powered to detect differences in subgroups | Oculex Pharmaceuticals Inc.                                                     |
| <b>Fluocinolone</b>                  |                                              |                        |                                                                 |                                   |                             |                                                                                                                             |                                                                                 |
| FAME Study (Campochiaro 2011)[29,60] | Unclear                                      | Unclear                | Partial (patients, masking of outcome assessment not mentioned) | Yes (drop-out rate 19.0 to 22.7%) | Yes                         | Comparison groups similar at baseline; power analysis not mentioned                                                         | Alimera Sciences Inc., Atlanta, Georgia; Psivida Inc., Watertown, Massachusetts |



| Study (author and year)                              | Adequate sequence generation | Allocation concealment | Masking                                                                                                                              | Incomplete outcome data addressed              | Free of selective reporting | Free of other bias (e.g. similarity at baseline, power assessment)                                                               | Funder                                                                                                                                                                                          |
|------------------------------------------------------|------------------------------|------------------------|--------------------------------------------------------------------------------------------------------------------------------------|------------------------------------------------|-----------------------------|----------------------------------------------------------------------------------------------------------------------------------|-------------------------------------------------------------------------------------------------------------------------------------------------------------------------------------------------|
| Pearson 2011[43]                                     | Yes                          | Unclear                | Third party masked design (patient and investigator not masked)                                                                      | No losses to follow-up                         | Yes                         | Demographic characteristics were similar between implant and SOC groups; power calculation done, study adequately powered.       | Bausch & Lomb Inc, Rochester, New York                                                                                                                                                          |
| <b>Triamcinolone</b>                                 |                              |                        |                                                                                                                                      |                                                |                             |                                                                                                                                  |                                                                                                                                                                                                 |
| DRCR Network 2008 [22,61,63,64]                      | Yes                          | Unclear                | Partial (patients to triamcinolone dose, outcome assessors not formally masked but generally not aware of participant's study group) | Yes (81 to 86% completion)                     | Yes                         | Comparison groups similar at baseline; power analysis carried out (power adequate for VA changes)                                | Cooperative agreement from the National Eye Institute, National Institute of Diabetes and Digestive and Kidney Diseases, National Institutes of Health, Department of Health and Human Services |
| Gillies 2006 / 2007 / 2009 / Sutter 2004[32,136-138] | Yes                          | Yes                    | Yes (patients, outcome assessors)                                                                                                    | Yes (91% completion intervention, 83% control) | Yes                         | Comparison groups similar at baseline (but limited demographic data); power analysis carried out (power adequate for VA changes) | Sydney Eye Hospital Foundation and Juvenile Diabetes Research Foundation, New York                                                                                                              |
| Gillies 2011[33]                                     | Yes                          | Yes                    | Yes (patients, outcome assessors)                                                                                                    | Yes (84.5% completion)                         | Yes                         | power analysis carried out (power adequate for VA changes)                                                                       | National Health and Medical Research Council, Canberra, Australia, and the Sydney Eye Hospital Foundation, Sydney, Australia                                                                    |
| Lam 2007[34]                                         | Yes                          | Yes                    | Partial (outcome assessors)                                                                                                          | No losses to follow-up                         | Yes                         | Comparison groups similar at baseline; power analysis carried out (power adequate for CMT changes)                               | Action for Vision Foundation, Hong Kong                                                                                                                                                         |
| Ockrim 2008/Sviprasad 2008[42,62]                    | Yes                          | Unclear                | Unclear                                                                                                                              | Yes (94% completion)                           | Yes                         | Comparison groups similar at baseline; power analysis carried out (power adequate for VA changes)                                | Special Trustees of Moorfields Eye Hospital                                                                                                                                                     |
| <b>Active comparator trials</b>                      |                              |                        |                                                                                                                                      |                                                |                             |                                                                                                                                  |                                                                                                                                                                                                 |

| Study (author and year) | Adequate sequence generation | Allocation concealment | Masking                                                                                                   | Incomplete outcome data addressed          | Free of selective reporting | Free of other bias (e.g. similarity at baseline, power assessment)                                                                                                      | Funder                                                                                                                                                                                                                                                                                                                         |
|-------------------------|------------------------------|------------------------|-----------------------------------------------------------------------------------------------------------|--------------------------------------------|-----------------------------|-------------------------------------------------------------------------------------------------------------------------------------------------------------------------|--------------------------------------------------------------------------------------------------------------------------------------------------------------------------------------------------------------------------------------------------------------------------------------------------------------------------------|
| Ahmadih 2008[31]        | Yes                          | Yes                    | Yes (patients and outcome assessors)                                                                      | Unclear                                    | Yes                         | CMT lower in control group at baseline ( $p < 0.05$ ), other baseline values similar; power analysis carried out (power adequate for CMT changes)                       | Not reported                                                                                                                                                                                                                                                                                                                   |
| DRCR Network [21,46]    | Yes                          | Unclear                | Yes (patients, except deferred laser group; outcome assessors); masking discontinued after the first year | Yes (1 year completion for 91-95% of eyes) | Yes                         | Comparison groups similar at baseline; power analysis carried out (power adequate for VA changes)                                                                       | Cooperative agreement from the National Eye Institute, National Institute of Diabetes and Digestive and Kidney Diseases, National Institutes of Health and Human Services; Ranibizumab provided by Genentech, triamcinolone provided by Allergan Inc.; companies also provided funds to defray the study's clinical site costs |
| Lim 2012[55]            | Yes                          | Unclear                | Yes (investigators only)                                                                                  | Yes (7.5% drop out after enrollment)       | Yes                         | Groups similar at baseline. The bevacizumab group received more injections.                                                                                             | Not reported                                                                                                                                                                                                                                                                                                                   |
| Soheilian [37,41]       | Yes                          | Yes                    | Yes (patients and outcome assessors)                                                                      | Unclear (36 week completion for 76 to 88%) | Yes                         | CMT significantly lower and VA significantly better in MPC group at baseline, other baseline values similar; power analysis carried out (power adequate for VA changes) | Ophthalmic Research Centre, Labbafinejad Medical Center, Tehran                                                                                                                                                                                                                                                                |

Table 3: Ranibizumab trials

| Study                                                                                                                                                                                                                                                                        | Participants and baseline values                                                                                                                                                                                                                                                                                                                                                                                                                                                                                                                                                                                                                                                                                                                                                                                                                                                    | Intervention                                                                                                                                                                                                                                                                                                                                                                                                                                                                                                                                                                                                                                                                                      | Outcome (change from baseline at study end)                                                                                                                                                                                                                                                                                                                                                                                                                                                                                                                                                                                                                                                                                                                                                                                                                                                                                                                                                                                                                                                        |  |                        |   |               |       |             |               |       |    |             |               |                |               |                       |            |               |                       |    |             |    |  |  |                       |   |            |        |                                                                                                 |          |       |  |             |        |  |
|------------------------------------------------------------------------------------------------------------------------------------------------------------------------------------------------------------------------------------------------------------------------------|-------------------------------------------------------------------------------------------------------------------------------------------------------------------------------------------------------------------------------------------------------------------------------------------------------------------------------------------------------------------------------------------------------------------------------------------------------------------------------------------------------------------------------------------------------------------------------------------------------------------------------------------------------------------------------------------------------------------------------------------------------------------------------------------------------------------------------------------------------------------------------------|---------------------------------------------------------------------------------------------------------------------------------------------------------------------------------------------------------------------------------------------------------------------------------------------------------------------------------------------------------------------------------------------------------------------------------------------------------------------------------------------------------------------------------------------------------------------------------------------------------------------------------------------------------------------------------------------------|----------------------------------------------------------------------------------------------------------------------------------------------------------------------------------------------------------------------------------------------------------------------------------------------------------------------------------------------------------------------------------------------------------------------------------------------------------------------------------------------------------------------------------------------------------------------------------------------------------------------------------------------------------------------------------------------------------------------------------------------------------------------------------------------------------------------------------------------------------------------------------------------------------------------------------------------------------------------------------------------------------------------------------------------------------------------------------------------------|--|------------------------|---|---------------|-------|-------------|---------------|-------|----|-------------|---------------|----------------|---------------|-----------------------|------------|---------------|-----------------------|----|-------------|----|--|--|-----------------------|---|------------|--------|-------------------------------------------------------------------------------------------------|----------|-------|--|-------------|--------|--|
| <p><b>READ-2 Study (Nguyen 2009 / Nguyen 2010)</b>[28,47]<br/>USA<br/>Multicenter</p> <p><b>Design:</b> 3-arm RCT<br/><b>Follow-up:</b> 6 months, 2 year extension [no relevant outcomes as IVR received by all groups by that time, no safety outcomes for 2 year data]</p> | <p><b>N:</b> 126 eyes of 126 patients<br/><b>Inclusion criteria:</b> <math>\geq 18</math> years, type 1 or 2 DM, DMO, BCVA 20/40 to 20/320, CMT <math>\geq 250</math> <math>\mu\text{m}</math>, HbA1c <math>\geq 6\%</math> within 12 months before randomization; expectation that scatter laser photocoagulation not required for 6 months<br/><b>Exclusion criteria:</b> contributing causes to reduced BCVA other than DMO, focal/grid laser within 3 months, intraocular steroid within 3 months, intraocular VEGF antagonist within 2 months<br/><b>Age:</b> 62 years<br/><b>Sex:</b> 52 to 69% female<br/><b>Diabetes type:</b> not reported<br/><b>HbA1c:</b> 7.39 to 7.77%<br/><b>Baseline VA:</b> ETDRS letter score 24.85 to 28.35<br/><b>Baseline CMT:</b> excess foveal thickness 198.75 to 262.52 <math>\mu\text{m}</math><br/><b>Comorbidities:</b> not reported</p> | <p><b>Group 1 (IVR, n=42 eyes):</b> IV injections of 0.5 mg ranibizumab at baseline, 1, 3, and 5 months<br/><b>Group 2 (L, n=42 eyes):</b> focal/grid laser at baseline and 3 months if CMT <math>\geq 250</math> <math>\mu\text{m}</math><br/><b>Group 3 (IVRL, n=42 eyes):</b> IV injections of 0.5 mg ranibizumab at baseline and 3 months, followed by focal/grid laser treatment 1 week later<br/><b>Regimen for all groups:</b> after 6 months, patients could receive IV injections of ranibizumab no more than every 2 months or focal/grid laser no more than every 3 months if CMT <math>\geq 250</math> <math>\mu\text{m}</math><br/><b>Laser Modified ETDRS protocol</b> was used</p> | <p><b>At 6 months</b><br/><b>BCVA (ETDRS):</b></p> <table border="1"> <thead> <tr> <th></th> <th>BCVA (letters)</th> <th>p</th> </tr> </thead> <tbody> <tr> <td><b>IVR</b></td> <td>+7.24</td> <td>0.0003 vs L</td> </tr> <tr> <td><b>L</b></td> <td>-0.43</td> <td></td> </tr> <tr> <td><b>IVRL</b></td> <td>+3.80</td> <td>NS vs IVR or L</td> </tr> </tbody> </table> <p><b>plus <math>\geq 3</math> lines</b></p> <table border="1"> <tbody> <tr> <td><b>IVR</b></td> <td>22%</td> <td>&lt;0.05 vs L</td> </tr> <tr> <td><b>L</b></td> <td>0</td> <td></td> </tr> <tr> <td><b>IVRL</b></td> <td>8%</td> <td></td> </tr> </tbody> </table> <p><b>CMT (OCT):</b></p> <table border="1"> <thead> <tr> <th></th> <th>CMT (<math>\mu\text{m}</math>)</th> <th>p</th> </tr> </thead> <tbody> <tr> <td><b>IVR</b></td> <td>-106.3</td> <td>all &lt;0.01 vs baseline, NS for elimination of <math>\geq 50\%</math> excess foveal thickness between groups</td> </tr> <tr> <td><b>L</b></td> <td>-82.8</td> <td></td> </tr> <tr> <td><b>IVRL</b></td> <td>-117.2</td> <td></td> </tr> </tbody> </table> |  | BCVA (letters)         | p | <b>IVR</b>    | +7.24 | 0.0003 vs L | <b>L</b>      | -0.43 |    | <b>IVRL</b> | +3.80         | NS vs IVR or L | <b>IVR</b>    | 22%                   | <0.05 vs L | <b>L</b>      | 0                     |    | <b>IVRL</b> | 8% |  |  | CMT ( $\mu\text{m}$ ) | p | <b>IVR</b> | -106.3 | all <0.01 vs baseline, NS for elimination of $\geq 50\%$ excess foveal thickness between groups | <b>L</b> | -82.8 |  | <b>IVRL</b> | -117.2 |  |
|                                                                                                                                                                                                                                                                              | BCVA (letters)                                                                                                                                                                                                                                                                                                                                                                                                                                                                                                                                                                                                                                                                                                                                                                                                                                                                      | p                                                                                                                                                                                                                                                                                                                                                                                                                                                                                                                                                                                                                                                                                                 |                                                                                                                                                                                                                                                                                                                                                                                                                                                                                                                                                                                                                                                                                                                                                                                                                                                                                                                                                                                                                                                                                                    |  |                        |   |               |       |             |               |       |    |             |               |                |               |                       |            |               |                       |    |             |    |  |  |                       |   |            |        |                                                                                                 |          |       |  |             |        |  |
| <b>IVR</b>                                                                                                                                                                                                                                                                   | +7.24                                                                                                                                                                                                                                                                                                                                                                                                                                                                                                                                                                                                                                                                                                                                                                                                                                                                               | 0.0003 vs L                                                                                                                                                                                                                                                                                                                                                                                                                                                                                                                                                                                                                                                                                       |                                                                                                                                                                                                                                                                                                                                                                                                                                                                                                                                                                                                                                                                                                                                                                                                                                                                                                                                                                                                                                                                                                    |  |                        |   |               |       |             |               |       |    |             |               |                |               |                       |            |               |                       |    |             |    |  |  |                       |   |            |        |                                                                                                 |          |       |  |             |        |  |
| <b>L</b>                                                                                                                                                                                                                                                                     | -0.43                                                                                                                                                                                                                                                                                                                                                                                                                                                                                                                                                                                                                                                                                                                                                                                                                                                                               |                                                                                                                                                                                                                                                                                                                                                                                                                                                                                                                                                                                                                                                                                                   |                                                                                                                                                                                                                                                                                                                                                                                                                                                                                                                                                                                                                                                                                                                                                                                                                                                                                                                                                                                                                                                                                                    |  |                        |   |               |       |             |               |       |    |             |               |                |               |                       |            |               |                       |    |             |    |  |  |                       |   |            |        |                                                                                                 |          |       |  |             |        |  |
| <b>IVRL</b>                                                                                                                                                                                                                                                                  | +3.80                                                                                                                                                                                                                                                                                                                                                                                                                                                                                                                                                                                                                                                                                                                                                                                                                                                                               | NS vs IVR or L                                                                                                                                                                                                                                                                                                                                                                                                                                                                                                                                                                                                                                                                                    |                                                                                                                                                                                                                                                                                                                                                                                                                                                                                                                                                                                                                                                                                                                                                                                                                                                                                                                                                                                                                                                                                                    |  |                        |   |               |       |             |               |       |    |             |               |                |               |                       |            |               |                       |    |             |    |  |  |                       |   |            |        |                                                                                                 |          |       |  |             |        |  |
| <b>IVR</b>                                                                                                                                                                                                                                                                   | 22%                                                                                                                                                                                                                                                                                                                                                                                                                                                                                                                                                                                                                                                                                                                                                                                                                                                                                 | <0.05 vs L                                                                                                                                                                                                                                                                                                                                                                                                                                                                                                                                                                                                                                                                                        |                                                                                                                                                                                                                                                                                                                                                                                                                                                                                                                                                                                                                                                                                                                                                                                                                                                                                                                                                                                                                                                                                                    |  |                        |   |               |       |             |               |       |    |             |               |                |               |                       |            |               |                       |    |             |    |  |  |                       |   |            |        |                                                                                                 |          |       |  |             |        |  |
| <b>L</b>                                                                                                                                                                                                                                                                     | 0                                                                                                                                                                                                                                                                                                                                                                                                                                                                                                                                                                                                                                                                                                                                                                                                                                                                                   |                                                                                                                                                                                                                                                                                                                                                                                                                                                                                                                                                                                                                                                                                                   |                                                                                                                                                                                                                                                                                                                                                                                                                                                                                                                                                                                                                                                                                                                                                                                                                                                                                                                                                                                                                                                                                                    |  |                        |   |               |       |             |               |       |    |             |               |                |               |                       |            |               |                       |    |             |    |  |  |                       |   |            |        |                                                                                                 |          |       |  |             |        |  |
| <b>IVRL</b>                                                                                                                                                                                                                                                                  | 8%                                                                                                                                                                                                                                                                                                                                                                                                                                                                                                                                                                                                                                                                                                                                                                                                                                                                                  |                                                                                                                                                                                                                                                                                                                                                                                                                                                                                                                                                                                                                                                                                                   |                                                                                                                                                                                                                                                                                                                                                                                                                                                                                                                                                                                                                                                                                                                                                                                                                                                                                                                                                                                                                                                                                                    |  |                        |   |               |       |             |               |       |    |             |               |                |               |                       |            |               |                       |    |             |    |  |  |                       |   |            |        |                                                                                                 |          |       |  |             |        |  |
|                                                                                                                                                                                                                                                                              | CMT ( $\mu\text{m}$ )                                                                                                                                                                                                                                                                                                                                                                                                                                                                                                                                                                                                                                                                                                                                                                                                                                                               | p                                                                                                                                                                                                                                                                                                                                                                                                                                                                                                                                                                                                                                                                                                 |                                                                                                                                                                                                                                                                                                                                                                                                                                                                                                                                                                                                                                                                                                                                                                                                                                                                                                                                                                                                                                                                                                    |  |                        |   |               |       |             |               |       |    |             |               |                |               |                       |            |               |                       |    |             |    |  |  |                       |   |            |        |                                                                                                 |          |       |  |             |        |  |
| <b>IVR</b>                                                                                                                                                                                                                                                                   | -106.3                                                                                                                                                                                                                                                                                                                                                                                                                                                                                                                                                                                                                                                                                                                                                                                                                                                                              | all <0.01 vs baseline, NS for elimination of $\geq 50\%$ excess foveal thickness between groups                                                                                                                                                                                                                                                                                                                                                                                                                                                                                                                                                                                                   |                                                                                                                                                                                                                                                                                                                                                                                                                                                                                                                                                                                                                                                                                                                                                                                                                                                                                                                                                                                                                                                                                                    |  |                        |   |               |       |             |               |       |    |             |               |                |               |                       |            |               |                       |    |             |    |  |  |                       |   |            |        |                                                                                                 |          |       |  |             |        |  |
| <b>L</b>                                                                                                                                                                                                                                                                     | -82.8                                                                                                                                                                                                                                                                                                                                                                                                                                                                                                                                                                                                                                                                                                                                                                                                                                                                               |                                                                                                                                                                                                                                                                                                                                                                                                                                                                                                                                                                                                                                                                                                   |                                                                                                                                                                                                                                                                                                                                                                                                                                                                                                                                                                                                                                                                                                                                                                                                                                                                                                                                                                                                                                                                                                    |  |                        |   |               |       |             |               |       |    |             |               |                |               |                       |            |               |                       |    |             |    |  |  |                       |   |            |        |                                                                                                 |          |       |  |             |        |  |
| <b>IVRL</b>                                                                                                                                                                                                                                                                  | -117.2                                                                                                                                                                                                                                                                                                                                                                                                                                                                                                                                                                                                                                                                                                                                                                                                                                                                              |                                                                                                                                                                                                                                                                                                                                                                                                                                                                                                                                                                                                                                                                                                   |                                                                                                                                                                                                                                                                                                                                                                                                                                                                                                                                                                                                                                                                                                                                                                                                                                                                                                                                                                                                                                                                                                    |  |                        |   |               |       |             |               |       |    |             |               |                |               |                       |            |               |                       |    |             |    |  |  |                       |   |            |        |                                                                                                 |          |       |  |             |        |  |
| <p><b>READ-3 Study (Do 2012)</b><br/>USA[50]</p> <p><b>Design:</b> phase 2, 2-arm RCT<br/><b>Follow-up:</b> 6 months</p>                                                                                                                                                     | <p><b>N:</b> 152 eyes<br/><b>Inclusion criteria:</b> NR<br/><b>Exclusion criteria:</b> NR<br/><b>Age:</b> NR<br/><b>Sex:</b> NR<br/><b>Diabetes type:</b> NR<br/><b>HbA1c:</b> NR<br/><b>Baseline VA:</b> Mean BCVA Snellen equivalent 20/63 in the 2.0 mg group and 20/80 in the 0.5 mg group<br/><b>Baseline CST (central subfield thickness):</b> 432 <math>\mu\text{m}</math> in the 2.0 mg group and 441 <math>\mu\text{m}</math> in the 0.5 mg group<br/><b>Comorbidities:</b> NR</p>                                                                                                                                                                                                                                                                                                                                                                                         | <p><b>Group 1 (IVR2.0, n=NR):</b> monthly injections<br/><b>Group 2 (IVR0.5, n=NR):</b> monthly injections</p> <p>After month 6, eyes evaluated and additional ranibizumab injections given on an as needed basis if DMO still present on OCT.</p>                                                                                                                                                                                                                                                                                                                                                                                                                                                | <p><b>At 6 months:</b><br/><b>BCVA</b></p> <table border="1"> <thead> <tr> <th></th> <th>Mean BCVA letters gain</th> <th>p</th> </tr> </thead> <tbody> <tr> <td><b>IVR2.0</b></td> <td>+7.46</td> <td>NR</td> </tr> <tr> <td><b>IVR0.5</b></td> <td>+8.69</td> <td>NR</td> </tr> </tbody> </table> <p><b>CST</b></p> <table border="1"> <thead> <tr> <th></th> <th>CST reduction</th> <th>p</th> </tr> </thead> <tbody> <tr> <td><b>IVR2.0</b></td> <td>-163.86 <math>\mu\text{m}</math></td> <td>NR</td> </tr> <tr> <td><b>IVR0.5</b></td> <td>-169.27 <math>\mu\text{m}</math></td> <td>NR</td> </tr> </tbody> </table>                                                                                                                                                                                                                                                                                                                                                                                                                                                                          |  | Mean BCVA letters gain | p | <b>IVR2.0</b> | +7.46 | NR          | <b>IVR0.5</b> | +8.69 | NR |             | CST reduction | p              | <b>IVR2.0</b> | -163.86 $\mu\text{m}$ | NR         | <b>IVR0.5</b> | -169.27 $\mu\text{m}$ | NR |             |    |  |  |                       |   |            |        |                                                                                                 |          |       |  |             |        |  |
|                                                                                                                                                                                                                                                                              | Mean BCVA letters gain                                                                                                                                                                                                                                                                                                                                                                                                                                                                                                                                                                                                                                                                                                                                                                                                                                                              | p                                                                                                                                                                                                                                                                                                                                                                                                                                                                                                                                                                                                                                                                                                 |                                                                                                                                                                                                                                                                                                                                                                                                                                                                                                                                                                                                                                                                                                                                                                                                                                                                                                                                                                                                                                                                                                    |  |                        |   |               |       |             |               |       |    |             |               |                |               |                       |            |               |                       |    |             |    |  |  |                       |   |            |        |                                                                                                 |          |       |  |             |        |  |
| <b>IVR2.0</b>                                                                                                                                                                                                                                                                | +7.46                                                                                                                                                                                                                                                                                                                                                                                                                                                                                                                                                                                                                                                                                                                                                                                                                                                                               | NR                                                                                                                                                                                                                                                                                                                                                                                                                                                                                                                                                                                                                                                                                                |                                                                                                                                                                                                                                                                                                                                                                                                                                                                                                                                                                                                                                                                                                                                                                                                                                                                                                                                                                                                                                                                                                    |  |                        |   |               |       |             |               |       |    |             |               |                |               |                       |            |               |                       |    |             |    |  |  |                       |   |            |        |                                                                                                 |          |       |  |             |        |  |
| <b>IVR0.5</b>                                                                                                                                                                                                                                                                | +8.69                                                                                                                                                                                                                                                                                                                                                                                                                                                                                                                                                                                                                                                                                                                                                                                                                                                                               | NR                                                                                                                                                                                                                                                                                                                                                                                                                                                                                                                                                                                                                                                                                                |                                                                                                                                                                                                                                                                                                                                                                                                                                                                                                                                                                                                                                                                                                                                                                                                                                                                                                                                                                                                                                                                                                    |  |                        |   |               |       |             |               |       |    |             |               |                |               |                       |            |               |                       |    |             |    |  |  |                       |   |            |        |                                                                                                 |          |       |  |             |        |  |
|                                                                                                                                                                                                                                                                              | CST reduction                                                                                                                                                                                                                                                                                                                                                                                                                                                                                                                                                                                                                                                                                                                                                                                                                                                                       | p                                                                                                                                                                                                                                                                                                                                                                                                                                                                                                                                                                                                                                                                                                 |                                                                                                                                                                                                                                                                                                                                                                                                                                                                                                                                                                                                                                                                                                                                                                                                                                                                                                                                                                                                                                                                                                    |  |                        |   |               |       |             |               |       |    |             |               |                |               |                       |            |               |                       |    |             |    |  |  |                       |   |            |        |                                                                                                 |          |       |  |             |        |  |
| <b>IVR2.0</b>                                                                                                                                                                                                                                                                | -163.86 $\mu\text{m}$                                                                                                                                                                                                                                                                                                                                                                                                                                                                                                                                                                                                                                                                                                                                                                                                                                                               | NR                                                                                                                                                                                                                                                                                                                                                                                                                                                                                                                                                                                                                                                                                                |                                                                                                                                                                                                                                                                                                                                                                                                                                                                                                                                                                                                                                                                                                                                                                                                                                                                                                                                                                                                                                                                                                    |  |                        |   |               |       |             |               |       |    |             |               |                |               |                       |            |               |                       |    |             |    |  |  |                       |   |            |        |                                                                                                 |          |       |  |             |        |  |
| <b>IVR0.5</b>                                                                                                                                                                                                                                                                | -169.27 $\mu\text{m}$                                                                                                                                                                                                                                                                                                                                                                                                                                                                                                                                                                                                                                                                                                                                                                                                                                                               | NR                                                                                                                                                                                                                                                                                                                                                                                                                                                                                                                                                                                                                                                                                                |                                                                                                                                                                                                                                                                                                                                                                                                                                                                                                                                                                                                                                                                                                                                                                                                                                                                                                                                                                                                                                                                                                    |  |                        |   |               |       |             |               |       |    |             |               |                |               |                       |            |               |                       |    |             |    |  |  |                       |   |            |        |                                                                                                 |          |       |  |             |        |  |

| Study                                                                                                                                                           | Participants and baseline values                                                                                                                                                                                                                                                                                                                                                                                                                                                                                                                                                                                                                                                                                                                                                                                                                                                                                                                                                                                         | Intervention                                                                                                                                                                                                                                                                                                                                                                                                                                                                                                                                                                                                                                                                                                                                                                                                                                                       | Outcome (change from baseline at study end)                                                                                                                                                                                                                                                                                                                                                                                                                                                                                                                                                                                                                                                                                                                                                                                                                                                                                                                                                                                                                                                                                                                                     |  |                |   |               |             |              |               |             |              |          |             |  |  |           |           |   |               |       |      |              |               |       |      |              |          |       |       |  |  |          |   |               |                |              |               |                |              |          |               |  |
|-----------------------------------------------------------------------------------------------------------------------------------------------------------------|--------------------------------------------------------------------------------------------------------------------------------------------------------------------------------------------------------------------------------------------------------------------------------------------------------------------------------------------------------------------------------------------------------------------------------------------------------------------------------------------------------------------------------------------------------------------------------------------------------------------------------------------------------------------------------------------------------------------------------------------------------------------------------------------------------------------------------------------------------------------------------------------------------------------------------------------------------------------------------------------------------------------------|--------------------------------------------------------------------------------------------------------------------------------------------------------------------------------------------------------------------------------------------------------------------------------------------------------------------------------------------------------------------------------------------------------------------------------------------------------------------------------------------------------------------------------------------------------------------------------------------------------------------------------------------------------------------------------------------------------------------------------------------------------------------------------------------------------------------------------------------------------------------|---------------------------------------------------------------------------------------------------------------------------------------------------------------------------------------------------------------------------------------------------------------------------------------------------------------------------------------------------------------------------------------------------------------------------------------------------------------------------------------------------------------------------------------------------------------------------------------------------------------------------------------------------------------------------------------------------------------------------------------------------------------------------------------------------------------------------------------------------------------------------------------------------------------------------------------------------------------------------------------------------------------------------------------------------------------------------------------------------------------------------------------------------------------------------------|--|----------------|---|---------------|-------------|--------------|---------------|-------------|--------------|----------|-------------|--|--|-----------|-----------|---|---------------|-------|------|--------------|---------------|-------|------|--------------|----------|-------|-------|--|--|----------|---|---------------|----------------|--------------|---------------|----------------|--------------|----------|---------------|--|
| <p><b>RESOLVE Study (Massin 2010)</b>[36]<br/>Multicenter international</p> <p><b>Design:</b> 3-arm placebo-controlled RCT<br/><b>Follow-up:</b> 12 months</p>  | <p><b>N:</b> 151 eyes of 151 patients<br/><b>Inclusion criteria:</b> &gt;18 years, type 1 or 2 DM, clinically significant DMO, BCVA 20/40 to 20/160, HbA1c &lt;12%, decreased vision attributed to foveal thickening from DMO, laser photocoagulation could be safely withheld in the study eye for at least 3 months after randomization<br/><b>Exclusion criteria:</b> unstable medical status, panretinal laser photocoagulation performed within 6 months before study entry, previous grid/laser photocoagulation except patients with only mild laser burns at least 1000 µm from the centre of the fovea performed &gt;6 months previously<br/><b>Age:</b> 63 to 65 (range 32 to 85) years<br/><b>Sex:</b> 43.1 to 49.0% female<br/><b>Diabetes type:</b> 96.1 to 98.0% type 2 DM<br/><b>HbA1c:</b> 7.3 to 7.6 (range 5.3 to 11.1) %<br/><b>Baseline VA:</b> ETDRS letter score 59.2 to 61.2 SD9.0 to 10.2<br/><b>Baseline CMT:</b> 448.9 to 459.5 SD102.8 to 120.1 µm<br/><b>Comorbidities:</b> not reported</p> | <p><b>Group 1 (IVR0.3, n=51 eyes):</b> 0.3 mg (0.05 ml) IV ranibizumab, 3 monthly injections (dose up to 0.6 mg, see below)<br/><b>Group 2 (IVR0.5, n=51 eyes):</b> 0.5 mg IV (0.05 ml) ranibizumab, 3 monthly injections (dose up to 1.0 mg, see below)<br/><b>Group 3 (C, n=49 eyes):</b> sham treatment, 3 monthly injections<br/><b>Regimen for all groups:</b> after month 1, the injection dose could be doubled if CMT remained &gt;300 µm or was &gt;225 µm and reduction in retinal oedema from previous assessment was &lt;50 µm; once injection volume was 0.1 ml it remained that for subsequent injections; if treatment had been withheld for &gt;45 days, subsequent injections restarted at 0.05 ml; 68.6% of dose doubling with ranibizumab, 91.8% with sham; 34.7% of rescue laser photocoagulation in sham group, 4.9% in ranibizumab group</p> | <p><b>At 12 months BCVA (ETDRS):</b></p> <table border="1"> <thead> <tr> <th></th> <th>BCVA (letters)</th> <th>p</th> </tr> </thead> <tbody> <tr> <td><i>IVR0.3</i></td> <td>+11.8 SD6.6</td> <td>&lt;0.0001 vs C</td> </tr> <tr> <td><i>IVR0.5</i></td> <td>+8.8 SD11.0</td> <td>&lt;0.0001 vs C</td> </tr> <tr> <td><i>C</i></td> <td>-1.4 SD14.2</td> <td></td> </tr> </tbody> </table> <p><b>change ≥10 letters</b></p> <table border="1"> <thead> <tr> <th></th> <th>gain</th> <th>loss</th> <th>p</th> </tr> </thead> <tbody> <tr> <td><i>IVR0.3</i></td> <td>72.5%</td> <td>0</td> <td>&lt;0.0001 vs C</td> </tr> <tr> <td><i>IVR0.5</i></td> <td>49.0%</td> <td>9.8%</td> <td>0.001 vs C</td> </tr> <tr> <td><i>C</i></td> <td>18.4%</td> <td>24.5%</td> <td></td> </tr> </tbody> </table> <p><b>CMT (OCT):</b></p> <table border="1"> <thead> <tr> <th></th> <th>CMT (µm)</th> <th>p</th> </tr> </thead> <tbody> <tr> <td><i>IVR0.3</i></td> <td>-200.7 SD122.2</td> <td>&lt;0.0001 vs C</td> </tr> <tr> <td><i>IVR0.5</i></td> <td>-187.6 SD147.8</td> <td>&lt;0.0001 vs C</td> </tr> <tr> <td><i>C</i></td> <td>-48.4 SD153.4</td> <td></td> </tr> </tbody> </table> |  | BCVA (letters) | p | <i>IVR0.3</i> | +11.8 SD6.6 | <0.0001 vs C | <i>IVR0.5</i> | +8.8 SD11.0 | <0.0001 vs C | <i>C</i> | -1.4 SD14.2 |  |  | gain      | loss      | p | <i>IVR0.3</i> | 72.5% | 0    | <0.0001 vs C | <i>IVR0.5</i> | 49.0% | 9.8% | 0.001 vs C   | <i>C</i> | 18.4% | 24.5% |  |  | CMT (µm) | p | <i>IVR0.3</i> | -200.7 SD122.2 | <0.0001 vs C | <i>IVR0.5</i> | -187.6 SD147.8 | <0.0001 vs C | <i>C</i> | -48.4 SD153.4 |  |
|                                                                                                                                                                 | BCVA (letters)                                                                                                                                                                                                                                                                                                                                                                                                                                                                                                                                                                                                                                                                                                                                                                                                                                                                                                                                                                                                           | p                                                                                                                                                                                                                                                                                                                                                                                                                                                                                                                                                                                                                                                                                                                                                                                                                                                                  |                                                                                                                                                                                                                                                                                                                                                                                                                                                                                                                                                                                                                                                                                                                                                                                                                                                                                                                                                                                                                                                                                                                                                                                 |  |                |   |               |             |              |               |             |              |          |             |  |  |           |           |   |               |       |      |              |               |       |      |              |          |       |       |  |  |          |   |               |                |              |               |                |              |          |               |  |
| <i>IVR0.3</i>                                                                                                                                                   | +11.8 SD6.6                                                                                                                                                                                                                                                                                                                                                                                                                                                                                                                                                                                                                                                                                                                                                                                                                                                                                                                                                                                                              | <0.0001 vs C                                                                                                                                                                                                                                                                                                                                                                                                                                                                                                                                                                                                                                                                                                                                                                                                                                                       |                                                                                                                                                                                                                                                                                                                                                                                                                                                                                                                                                                                                                                                                                                                                                                                                                                                                                                                                                                                                                                                                                                                                                                                 |  |                |   |               |             |              |               |             |              |          |             |  |  |           |           |   |               |       |      |              |               |       |      |              |          |       |       |  |  |          |   |               |                |              |               |                |              |          |               |  |
| <i>IVR0.5</i>                                                                                                                                                   | +8.8 SD11.0                                                                                                                                                                                                                                                                                                                                                                                                                                                                                                                                                                                                                                                                                                                                                                                                                                                                                                                                                                                                              | <0.0001 vs C                                                                                                                                                                                                                                                                                                                                                                                                                                                                                                                                                                                                                                                                                                                                                                                                                                                       |                                                                                                                                                                                                                                                                                                                                                                                                                                                                                                                                                                                                                                                                                                                                                                                                                                                                                                                                                                                                                                                                                                                                                                                 |  |                |   |               |             |              |               |             |              |          |             |  |  |           |           |   |               |       |      |              |               |       |      |              |          |       |       |  |  |          |   |               |                |              |               |                |              |          |               |  |
| <i>C</i>                                                                                                                                                        | -1.4 SD14.2                                                                                                                                                                                                                                                                                                                                                                                                                                                                                                                                                                                                                                                                                                                                                                                                                                                                                                                                                                                                              |                                                                                                                                                                                                                                                                                                                                                                                                                                                                                                                                                                                                                                                                                                                                                                                                                                                                    |                                                                                                                                                                                                                                                                                                                                                                                                                                                                                                                                                                                                                                                                                                                                                                                                                                                                                                                                                                                                                                                                                                                                                                                 |  |                |   |               |             |              |               |             |              |          |             |  |  |           |           |   |               |       |      |              |               |       |      |              |          |       |       |  |  |          |   |               |                |              |               |                |              |          |               |  |
|                                                                                                                                                                 | gain                                                                                                                                                                                                                                                                                                                                                                                                                                                                                                                                                                                                                                                                                                                                                                                                                                                                                                                                                                                                                     | loss                                                                                                                                                                                                                                                                                                                                                                                                                                                                                                                                                                                                                                                                                                                                                                                                                                                               | p                                                                                                                                                                                                                                                                                                                                                                                                                                                                                                                                                                                                                                                                                                                                                                                                                                                                                                                                                                                                                                                                                                                                                                               |  |                |   |               |             |              |               |             |              |          |             |  |  |           |           |   |               |       |      |              |               |       |      |              |          |       |       |  |  |          |   |               |                |              |               |                |              |          |               |  |
| <i>IVR0.3</i>                                                                                                                                                   | 72.5%                                                                                                                                                                                                                                                                                                                                                                                                                                                                                                                                                                                                                                                                                                                                                                                                                                                                                                                                                                                                                    | 0                                                                                                                                                                                                                                                                                                                                                                                                                                                                                                                                                                                                                                                                                                                                                                                                                                                                  | <0.0001 vs C                                                                                                                                                                                                                                                                                                                                                                                                                                                                                                                                                                                                                                                                                                                                                                                                                                                                                                                                                                                                                                                                                                                                                                    |  |                |   |               |             |              |               |             |              |          |             |  |  |           |           |   |               |       |      |              |               |       |      |              |          |       |       |  |  |          |   |               |                |              |               |                |              |          |               |  |
| <i>IVR0.5</i>                                                                                                                                                   | 49.0%                                                                                                                                                                                                                                                                                                                                                                                                                                                                                                                                                                                                                                                                                                                                                                                                                                                                                                                                                                                                                    | 9.8%                                                                                                                                                                                                                                                                                                                                                                                                                                                                                                                                                                                                                                                                                                                                                                                                                                                               | 0.001 vs C                                                                                                                                                                                                                                                                                                                                                                                                                                                                                                                                                                                                                                                                                                                                                                                                                                                                                                                                                                                                                                                                                                                                                                      |  |                |   |               |             |              |               |             |              |          |             |  |  |           |           |   |               |       |      |              |               |       |      |              |          |       |       |  |  |          |   |               |                |              |               |                |              |          |               |  |
| <i>C</i>                                                                                                                                                        | 18.4%                                                                                                                                                                                                                                                                                                                                                                                                                                                                                                                                                                                                                                                                                                                                                                                                                                                                                                                                                                                                                    | 24.5%                                                                                                                                                                                                                                                                                                                                                                                                                                                                                                                                                                                                                                                                                                                                                                                                                                                              |                                                                                                                                                                                                                                                                                                                                                                                                                                                                                                                                                                                                                                                                                                                                                                                                                                                                                                                                                                                                                                                                                                                                                                                 |  |                |   |               |             |              |               |             |              |          |             |  |  |           |           |   |               |       |      |              |               |       |      |              |          |       |       |  |  |          |   |               |                |              |               |                |              |          |               |  |
|                                                                                                                                                                 | CMT (µm)                                                                                                                                                                                                                                                                                                                                                                                                                                                                                                                                                                                                                                                                                                                                                                                                                                                                                                                                                                                                                 | p                                                                                                                                                                                                                                                                                                                                                                                                                                                                                                                                                                                                                                                                                                                                                                                                                                                                  |                                                                                                                                                                                                                                                                                                                                                                                                                                                                                                                                                                                                                                                                                                                                                                                                                                                                                                                                                                                                                                                                                                                                                                                 |  |                |   |               |             |              |               |             |              |          |             |  |  |           |           |   |               |       |      |              |               |       |      |              |          |       |       |  |  |          |   |               |                |              |               |                |              |          |               |  |
| <i>IVR0.3</i>                                                                                                                                                   | -200.7 SD122.2                                                                                                                                                                                                                                                                                                                                                                                                                                                                                                                                                                                                                                                                                                                                                                                                                                                                                                                                                                                                           | <0.0001 vs C                                                                                                                                                                                                                                                                                                                                                                                                                                                                                                                                                                                                                                                                                                                                                                                                                                                       |                                                                                                                                                                                                                                                                                                                                                                                                                                                                                                                                                                                                                                                                                                                                                                                                                                                                                                                                                                                                                                                                                                                                                                                 |  |                |   |               |             |              |               |             |              |          |             |  |  |           |           |   |               |       |      |              |               |       |      |              |          |       |       |  |  |          |   |               |                |              |               |                |              |          |               |  |
| <i>IVR0.5</i>                                                                                                                                                   | -187.6 SD147.8                                                                                                                                                                                                                                                                                                                                                                                                                                                                                                                                                                                                                                                                                                                                                                                                                                                                                                                                                                                                           | <0.0001 vs C                                                                                                                                                                                                                                                                                                                                                                                                                                                                                                                                                                                                                                                                                                                                                                                                                                                       |                                                                                                                                                                                                                                                                                                                                                                                                                                                                                                                                                                                                                                                                                                                                                                                                                                                                                                                                                                                                                                                                                                                                                                                 |  |                |   |               |             |              |               |             |              |          |             |  |  |           |           |   |               |       |      |              |               |       |      |              |          |       |       |  |  |          |   |               |                |              |               |                |              |          |               |  |
| <i>C</i>                                                                                                                                                        | -48.4 SD153.4                                                                                                                                                                                                                                                                                                                                                                                                                                                                                                                                                                                                                                                                                                                                                                                                                                                                                                                                                                                                            |                                                                                                                                                                                                                                                                                                                                                                                                                                                                                                                                                                                                                                                                                                                                                                                                                                                                    |                                                                                                                                                                                                                                                                                                                                                                                                                                                                                                                                                                                                                                                                                                                                                                                                                                                                                                                                                                                                                                                                                                                                                                                 |  |                |   |               |             |              |               |             |              |          |             |  |  |           |           |   |               |       |      |              |               |       |      |              |          |       |       |  |  |          |   |               |                |              |               |                |              |          |               |  |
| <p><b>RESTORE Study (Mitchell 2011/ Mitchell 2012)</b>[24,49]<br/>Multicenter international</p> <p><b>Design:</b> 3-arm RCT<br/><b>Follow-up:</b> 12 months</p> | <p><b>N:</b> 345 eyes of 345 patients<br/><b>Inclusion criteria:</b> ≥18 years, type 1 or 2 DM, HbA1c ≤10%, visual impairment due to DMO (eligible for laser treatment), stable medication for management of diabetes, BCVA ETDRS letter score 39 to 78<br/><b>Exclusion criteria:</b> concomitant eye conditions that could affect VA, active intraocular inflammation or infection, uncontrolled glaucoma in either eye, panretinal laser photocoagulation within 6 months or focal/grid laser photocoagulation within 3 months prior to study entry, history of stroke, hypertension.<br/><b>Age:</b> 62.9 to 64.0 SD8.15 to 9.29 years<br/><b>Sex:</b> 37.1 to 47.7% female<br/><b>Diabetes type:</b> 86.4 to 88.8% type 2 DM<br/><b>HbA1c:</b> not reported</p>                                                                                                                                                                                                                                                     | <p><b>Group 1 (IVR, n=116 eyes):</b> 0.5 mg IV ranibizumab plus sham laser (median injections 7 (range 1 to 12), median sham laser treatments 2 (range 1 to 5))<br/><b>Group 2 (IVRL, n=118 eyes):</b> 0.5 mg IV ranibizumab plus active laser (median injections 7 (range 2 to 12), median laser treatments 1 (range 1 to 5))<br/><b>Group 3 (L, n=111 eyes):</b> laser treatment plus sham injections (median sham injections 7 (range 1 to 12), median laser treatments 2 (range 1 to 4))<br/><b>Regimen for all groups:</b> 3 initial monthly injections, followed by retreatment schedule; 1 injection per month if stable VA not reached;</p>                                                                                                                                                                                                                | <p><b>At 12 months BCVA (ETDRS):</b></p> <table border="1"> <thead> <tr> <th></th> <th>BCVA (letters)</th> <th>p</th> </tr> </thead> <tbody> <tr> <td><i>IVR</i></td> <td>+6.1 SD6.43</td> <td>&lt;0.0001 vs L</td> </tr> <tr> <td><i>IVRL</i></td> <td>+5.9 SD7.92</td> <td>&lt;0.0001 vs L</td> </tr> <tr> <td><i>L</i></td> <td>+0.8 SD8.56</td> <td></td> </tr> </tbody> </table> <p><b>BCVA change categories</b></p> <table border="1"> <thead> <tr> <th></th> <th>plus ≥10:</th> <th>loss ≥10:</th> <th>p</th> </tr> </thead> <tbody> <tr> <td><i>IVR</i></td> <td>37.4%</td> <td>3.5%</td> <td>&lt;0.0001 vs L</td> </tr> <tr> <td><i>IVRL</i></td> <td>43.2%</td> <td>4.2%</td> <td>&lt;0.0001 vs L</td> </tr> <tr> <td><i>L</i></td> <td>15.5%</td> <td>12.7%</td> <td></td> </tr> </tbody> </table> <p><b>CMT (OCT):</b></p>                                                                                                                                                                                                                                                                                                                                         |  | BCVA (letters) | p | <i>IVR</i>    | +6.1 SD6.43 | <0.0001 vs L | <i>IVRL</i>   | +5.9 SD7.92 | <0.0001 vs L | <i>L</i> | +0.8 SD8.56 |  |  | plus ≥10: | loss ≥10: | p | <i>IVR</i>    | 37.4% | 3.5% | <0.0001 vs L | <i>IVRL</i>   | 43.2% | 4.2% | <0.0001 vs L | <i>L</i> | 15.5% | 12.7% |  |  |          |   |               |                |              |               |                |              |          |               |  |
|                                                                                                                                                                 | BCVA (letters)                                                                                                                                                                                                                                                                                                                                                                                                                                                                                                                                                                                                                                                                                                                                                                                                                                                                                                                                                                                                           | p                                                                                                                                                                                                                                                                                                                                                                                                                                                                                                                                                                                                                                                                                                                                                                                                                                                                  |                                                                                                                                                                                                                                                                                                                                                                                                                                                                                                                                                                                                                                                                                                                                                                                                                                                                                                                                                                                                                                                                                                                                                                                 |  |                |   |               |             |              |               |             |              |          |             |  |  |           |           |   |               |       |      |              |               |       |      |              |          |       |       |  |  |          |   |               |                |              |               |                |              |          |               |  |
| <i>IVR</i>                                                                                                                                                      | +6.1 SD6.43                                                                                                                                                                                                                                                                                                                                                                                                                                                                                                                                                                                                                                                                                                                                                                                                                                                                                                                                                                                                              | <0.0001 vs L                                                                                                                                                                                                                                                                                                                                                                                                                                                                                                                                                                                                                                                                                                                                                                                                                                                       |                                                                                                                                                                                                                                                                                                                                                                                                                                                                                                                                                                                                                                                                                                                                                                                                                                                                                                                                                                                                                                                                                                                                                                                 |  |                |   |               |             |              |               |             |              |          |             |  |  |           |           |   |               |       |      |              |               |       |      |              |          |       |       |  |  |          |   |               |                |              |               |                |              |          |               |  |
| <i>IVRL</i>                                                                                                                                                     | +5.9 SD7.92                                                                                                                                                                                                                                                                                                                                                                                                                                                                                                                                                                                                                                                                                                                                                                                                                                                                                                                                                                                                              | <0.0001 vs L                                                                                                                                                                                                                                                                                                                                                                                                                                                                                                                                                                                                                                                                                                                                                                                                                                                       |                                                                                                                                                                                                                                                                                                                                                                                                                                                                                                                                                                                                                                                                                                                                                                                                                                                                                                                                                                                                                                                                                                                                                                                 |  |                |   |               |             |              |               |             |              |          |             |  |  |           |           |   |               |       |      |              |               |       |      |              |          |       |       |  |  |          |   |               |                |              |               |                |              |          |               |  |
| <i>L</i>                                                                                                                                                        | +0.8 SD8.56                                                                                                                                                                                                                                                                                                                                                                                                                                                                                                                                                                                                                                                                                                                                                                                                                                                                                                                                                                                                              |                                                                                                                                                                                                                                                                                                                                                                                                                                                                                                                                                                                                                                                                                                                                                                                                                                                                    |                                                                                                                                                                                                                                                                                                                                                                                                                                                                                                                                                                                                                                                                                                                                                                                                                                                                                                                                                                                                                                                                                                                                                                                 |  |                |   |               |             |              |               |             |              |          |             |  |  |           |           |   |               |       |      |              |               |       |      |              |          |       |       |  |  |          |   |               |                |              |               |                |              |          |               |  |
|                                                                                                                                                                 | plus ≥10:                                                                                                                                                                                                                                                                                                                                                                                                                                                                                                                                                                                                                                                                                                                                                                                                                                                                                                                                                                                                                | loss ≥10:                                                                                                                                                                                                                                                                                                                                                                                                                                                                                                                                                                                                                                                                                                                                                                                                                                                          | p                                                                                                                                                                                                                                                                                                                                                                                                                                                                                                                                                                                                                                                                                                                                                                                                                                                                                                                                                                                                                                                                                                                                                                               |  |                |   |               |             |              |               |             |              |          |             |  |  |           |           |   |               |       |      |              |               |       |      |              |          |       |       |  |  |          |   |               |                |              |               |                |              |          |               |  |
| <i>IVR</i>                                                                                                                                                      | 37.4%                                                                                                                                                                                                                                                                                                                                                                                                                                                                                                                                                                                                                                                                                                                                                                                                                                                                                                                                                                                                                    | 3.5%                                                                                                                                                                                                                                                                                                                                                                                                                                                                                                                                                                                                                                                                                                                                                                                                                                                               | <0.0001 vs L                                                                                                                                                                                                                                                                                                                                                                                                                                                                                                                                                                                                                                                                                                                                                                                                                                                                                                                                                                                                                                                                                                                                                                    |  |                |   |               |             |              |               |             |              |          |             |  |  |           |           |   |               |       |      |              |               |       |      |              |          |       |       |  |  |          |   |               |                |              |               |                |              |          |               |  |
| <i>IVRL</i>                                                                                                                                                     | 43.2%                                                                                                                                                                                                                                                                                                                                                                                                                                                                                                                                                                                                                                                                                                                                                                                                                                                                                                                                                                                                                    | 4.2%                                                                                                                                                                                                                                                                                                                                                                                                                                                                                                                                                                                                                                                                                                                                                                                                                                                               | <0.0001 vs L                                                                                                                                                                                                                                                                                                                                                                                                                                                                                                                                                                                                                                                                                                                                                                                                                                                                                                                                                                                                                                                                                                                                                                    |  |                |   |               |             |              |               |             |              |          |             |  |  |           |           |   |               |       |      |              |               |       |      |              |          |       |       |  |  |          |   |               |                |              |               |                |              |          |               |  |
| <i>L</i>                                                                                                                                                        | 15.5%                                                                                                                                                                                                                                                                                                                                                                                                                                                                                                                                                                                                                                                                                                                                                                                                                                                                                                                                                                                                                    | 12.7%                                                                                                                                                                                                                                                                                                                                                                                                                                                                                                                                                                                                                                                                                                                                                                                                                                                              |                                                                                                                                                                                                                                                                                                                                                                                                                                                                                                                                                                                                                                                                                                                                                                                                                                                                                                                                                                                                                                                                                                                                                                                 |  |                |   |               |             |              |               |             |              |          |             |  |  |           |           |   |               |       |      |              |               |       |      |              |          |       |       |  |  |          |   |               |                |              |               |                |              |          |               |  |

| Study                                                                                                                                                                   | Participants and baseline values                                                                                                                                                                                                                                                                                                                                                                                                                                                                                                                                                                                                           | Intervention                                                                                                                                                                                                                                                                                                                                                                                                                                              | Outcome (change from baseline at study end)                                                                                                                                                                                                                                                                                                                                                                                                                                                                                                                                                                                                                                                                                                                                                                                                                                                                                    |  |                                                    |   |                         |                 |                  |                    |                 |                  |                     |                |  |  |                                                       |  |                         |                            |              |                    |                            |              |                     |                           |  |
|-------------------------------------------------------------------------------------------------------------------------------------------------------------------------|--------------------------------------------------------------------------------------------------------------------------------------------------------------------------------------------------------------------------------------------------------------------------------------------------------------------------------------------------------------------------------------------------------------------------------------------------------------------------------------------------------------------------------------------------------------------------------------------------------------------------------------------|-----------------------------------------------------------------------------------------------------------------------------------------------------------------------------------------------------------------------------------------------------------------------------------------------------------------------------------------------------------------------------------------------------------------------------------------------------------|--------------------------------------------------------------------------------------------------------------------------------------------------------------------------------------------------------------------------------------------------------------------------------------------------------------------------------------------------------------------------------------------------------------------------------------------------------------------------------------------------------------------------------------------------------------------------------------------------------------------------------------------------------------------------------------------------------------------------------------------------------------------------------------------------------------------------------------------------------------------------------------------------------------------------------|--|----------------------------------------------------|---|-------------------------|-----------------|------------------|--------------------|-----------------|------------------|---------------------|----------------|--|--|-------------------------------------------------------|--|-------------------------|----------------------------|--------------|--------------------|----------------------------|--------------|---------------------|---------------------------|--|
|                                                                                                                                                                         | <b>Baseline VA:</b> ETDRS letter score 62.4 to 64.8 SD9.99 to 11.11<br><b>Baseline CMT:</b> 412.4 to 426.6 SD118.01 to 123.95<br><b>Comorbidities:</b> not reported                                                                                                                                                                                                                                                                                                                                                                                                                                                                        | <b>Laser</b> retreatments in accordance with ETDRS guidelines at intervals no shorter than 3 months from previous treatment                                                                                                                                                                                                                                                                                                                               | <table border="1"> <thead> <tr> <th></th> <th>CMT (<math>\mu\text{m}</math>)</th> <th>p</th> </tr> </thead> <tbody> <tr> <td><i>IVR</i></td> <td>-118.7 SD115.07</td> <td>0.0002 vs L</td> </tr> <tr> <td><i>IVRL</i></td> <td>-128.3 SD114.34</td> <td>&lt;0.0001 vs L</td> </tr> <tr> <td><i>L</i></td> <td>-61.3 SD132.29</td> <td></td> </tr> </tbody> </table>                                                                                                                                                                                                                                                                                                                                                                                                                                                                                                                                                            |  | CMT ( $\mu\text{m}$ )                              | p | <i>IVR</i>              | -118.7 SD115.07 | 0.0002 vs L      | <i>IVRL</i>        | -128.3 SD114.34 | <0.0001 vs L     | <i>L</i>            | -61.3 SD132.29 |  |  |                                                       |  |                         |                            |              |                    |                            |              |                     |                           |  |
|                                                                                                                                                                         | CMT ( $\mu\text{m}$ )                                                                                                                                                                                                                                                                                                                                                                                                                                                                                                                                                                                                                      | p                                                                                                                                                                                                                                                                                                                                                                                                                                                         |                                                                                                                                                                                                                                                                                                                                                                                                                                                                                                                                                                                                                                                                                                                                                                                                                                                                                                                                |  |                                                    |   |                         |                 |                  |                    |                 |                  |                     |                |  |  |                                                       |  |                         |                            |              |                    |                            |              |                     |                           |  |
| <i>IVR</i>                                                                                                                                                              | -118.7 SD115.07                                                                                                                                                                                                                                                                                                                                                                                                                                                                                                                                                                                                                            | 0.0002 vs L                                                                                                                                                                                                                                                                                                                                                                                                                                               |                                                                                                                                                                                                                                                                                                                                                                                                                                                                                                                                                                                                                                                                                                                                                                                                                                                                                                                                |  |                                                    |   |                         |                 |                  |                    |                 |                  |                     |                |  |  |                                                       |  |                         |                            |              |                    |                            |              |                     |                           |  |
| <i>IVRL</i>                                                                                                                                                             | -128.3 SD114.34                                                                                                                                                                                                                                                                                                                                                                                                                                                                                                                                                                                                                            | <0.0001 vs L                                                                                                                                                                                                                                                                                                                                                                                                                                              |                                                                                                                                                                                                                                                                                                                                                                                                                                                                                                                                                                                                                                                                                                                                                                                                                                                                                                                                |  |                                                    |   |                         |                 |                  |                    |                 |                  |                     |                |  |  |                                                       |  |                         |                            |              |                    |                            |              |                     |                           |  |
| <i>L</i>                                                                                                                                                                | -61.3 SD132.29                                                                                                                                                                                                                                                                                                                                                                                                                                                                                                                                                                                                                             |                                                                                                                                                                                                                                                                                                                                                                                                                                                           |                                                                                                                                                                                                                                                                                                                                                                                                                                                                                                                                                                                                                                                                                                                                                                                                                                                                                                                                |  |                                                    |   |                         |                 |                  |                    |                 |                  |                     |                |  |  |                                                       |  |                         |                            |              |                    |                            |              |                     |                           |  |
| <b>REVEAL Study (Ohji 2012)</b><br><b>Japan</b><br>Multicenter[48]<br><br><b>Design:</b> phase III double-masked RCT<br><b>Follow-up:</b> 12 months                     | <b>N:</b> 396 patients<br><b>Inclusion criteria:</b> NR<br><b>Exclusion criteria:</b> NR<br><b>Age:</b> 61.1 years<br><b>Sex:</b> NR<br><b>Diabetes type:</b> 98.7% with type 2 diabetes<br><b>HbA1c:</b> 7.5%<br><b>Baseline VA:</b> 58.6 letters<br><b>Baseline CMT:</b> 421.9 $\mu\text{m}$<br><b>Comorbidities:</b> NR                                                                                                                                                                                                                                                                                                                 | <b>Group 1 (IVR 0.5 + sham laser, n=133):</b> Day 1, month 1, 2 and pro-re-nata thereafter based on BCVA<br><b>Group 2 (IVR 0.5+ active laser, n=132):</b> Day 1, month 1, 2 and pro-re-nata thereafter based on BCVA<br><b>Group 3 (sham injection + active laser, n=131):</b> Day 1, month 1, 2 and pro-re-nata thereafter based on BCVA<br><br>Active/sham laser photocoagulation performed according to ETDRS guidelines at $\geq 3$ month intervals. | <b>At 12 months BCVA:</b> <table border="1"> <thead> <tr> <th></th> <th>Mean average change from baseline to month 1 to 12</th> <th>p</th> </tr> </thead> <tbody> <tr> <td><i>IVR + sham laser</i></td> <td>+5.9</td> <td>vs laser &lt;0.0001</td> </tr> <tr> <td><i>IVR + laser</i></td> <td>+5.7</td> <td>vs laser &lt;0.0001</td> </tr> <tr> <td><i>Laser + sham</i></td> <td>+1.4</td> <td></td> </tr> </tbody> </table><br><table border="1"> <thead> <tr> <th></th> <th>Mean change from baseline to month 12 in BCVA and CRT</th> <th></th> </tr> </thead> <tbody> <tr> <td><i>IVR + sham laser</i></td> <td>+6.6; -148.0 <math>\mu\text{m}</math></td> <td>vs C &lt;0.0001</td> </tr> <tr> <td><i>IVR + laser</i></td> <td>+6.4; -163.8 <math>\mu\text{m}</math></td> <td>vs C &lt;0.0001</td> </tr> <tr> <td><i>Laser + sham</i></td> <td>+1.8; -57.1 <math>\mu\text{m}</math></td> <td></td> </tr> </tbody> </table> |  | Mean average change from baseline to month 1 to 12 | p | <i>IVR + sham laser</i> | +5.9            | vs laser <0.0001 | <i>IVR + laser</i> | +5.7            | vs laser <0.0001 | <i>Laser + sham</i> | +1.4           |  |  | Mean change from baseline to month 12 in BCVA and CRT |  | <i>IVR + sham laser</i> | +6.6; -148.0 $\mu\text{m}$ | vs C <0.0001 | <i>IVR + laser</i> | +6.4; -163.8 $\mu\text{m}$ | vs C <0.0001 | <i>Laser + sham</i> | +1.8; -57.1 $\mu\text{m}$ |  |
|                                                                                                                                                                         | Mean average change from baseline to month 1 to 12                                                                                                                                                                                                                                                                                                                                                                                                                                                                                                                                                                                         | p                                                                                                                                                                                                                                                                                                                                                                                                                                                         |                                                                                                                                                                                                                                                                                                                                                                                                                                                                                                                                                                                                                                                                                                                                                                                                                                                                                                                                |  |                                                    |   |                         |                 |                  |                    |                 |                  |                     |                |  |  |                                                       |  |                         |                            |              |                    |                            |              |                     |                           |  |
| <i>IVR + sham laser</i>                                                                                                                                                 | +5.9                                                                                                                                                                                                                                                                                                                                                                                                                                                                                                                                                                                                                                       | vs laser <0.0001                                                                                                                                                                                                                                                                                                                                                                                                                                          |                                                                                                                                                                                                                                                                                                                                                                                                                                                                                                                                                                                                                                                                                                                                                                                                                                                                                                                                |  |                                                    |   |                         |                 |                  |                    |                 |                  |                     |                |  |  |                                                       |  |                         |                            |              |                    |                            |              |                     |                           |  |
| <i>IVR + laser</i>                                                                                                                                                      | +5.7                                                                                                                                                                                                                                                                                                                                                                                                                                                                                                                                                                                                                                       | vs laser <0.0001                                                                                                                                                                                                                                                                                                                                                                                                                                          |                                                                                                                                                                                                                                                                                                                                                                                                                                                                                                                                                                                                                                                                                                                                                                                                                                                                                                                                |  |                                                    |   |                         |                 |                  |                    |                 |                  |                     |                |  |  |                                                       |  |                         |                            |              |                    |                            |              |                     |                           |  |
| <i>Laser + sham</i>                                                                                                                                                     | +1.4                                                                                                                                                                                                                                                                                                                                                                                                                                                                                                                                                                                                                                       |                                                                                                                                                                                                                                                                                                                                                                                                                                                           |                                                                                                                                                                                                                                                                                                                                                                                                                                                                                                                                                                                                                                                                                                                                                                                                                                                                                                                                |  |                                                    |   |                         |                 |                  |                    |                 |                  |                     |                |  |  |                                                       |  |                         |                            |              |                    |                            |              |                     |                           |  |
|                                                                                                                                                                         | Mean change from baseline to month 12 in BCVA and CRT                                                                                                                                                                                                                                                                                                                                                                                                                                                                                                                                                                                      |                                                                                                                                                                                                                                                                                                                                                                                                                                                           |                                                                                                                                                                                                                                                                                                                                                                                                                                                                                                                                                                                                                                                                                                                                                                                                                                                                                                                                |  |                                                    |   |                         |                 |                  |                    |                 |                  |                     |                |  |  |                                                       |  |                         |                            |              |                    |                            |              |                     |                           |  |
| <i>IVR + sham laser</i>                                                                                                                                                 | +6.6; -148.0 $\mu\text{m}$                                                                                                                                                                                                                                                                                                                                                                                                                                                                                                                                                                                                                 | vs C <0.0001                                                                                                                                                                                                                                                                                                                                                                                                                                              |                                                                                                                                                                                                                                                                                                                                                                                                                                                                                                                                                                                                                                                                                                                                                                                                                                                                                                                                |  |                                                    |   |                         |                 |                  |                    |                 |                  |                     |                |  |  |                                                       |  |                         |                            |              |                    |                            |              |                     |                           |  |
| <i>IVR + laser</i>                                                                                                                                                      | +6.4; -163.8 $\mu\text{m}$                                                                                                                                                                                                                                                                                                                                                                                                                                                                                                                                                                                                                 | vs C <0.0001                                                                                                                                                                                                                                                                                                                                                                                                                                              |                                                                                                                                                                                                                                                                                                                                                                                                                                                                                                                                                                                                                                                                                                                                                                                                                                                                                                                                |  |                                                    |   |                         |                 |                  |                    |                 |                  |                     |                |  |  |                                                       |  |                         |                            |              |                    |                            |              |                     |                           |  |
| <i>Laser + sham</i>                                                                                                                                                     | +1.8; -57.1 $\mu\text{m}$                                                                                                                                                                                                                                                                                                                                                                                                                                                                                                                                                                                                                  |                                                                                                                                                                                                                                                                                                                                                                                                                                                           |                                                                                                                                                                                                                                                                                                                                                                                                                                                                                                                                                                                                                                                                                                                                                                                                                                                                                                                                |  |                                                    |   |                         |                 |                  |                    |                 |                  |                     |                |  |  |                                                       |  |                         |                            |              |                    |                            |              |                     |                           |  |
| <b>RISE Study (Brown 2011/Nguyen 2012)[38,139]</b><br><b>USA</b><br>Multicenter<br><b>Design:</b> 3-arm double-blind sham-controlled RCT<br><b>Follow-up:</b> 24 months | <b>N:</b> 377 eyes of 377 patients<br><b>Inclusion criteria:</b> $\geq 18$ years, type 1 or 2 diabetes, BCVA 20/40 to 20/320, DMO CMT $\geq 275$ $\mu\text{m}$<br><b>Exclusion criteria:</b> prior vitreoretinal surgery, recent history (within 3 months of screening) of panretinal or macular laser in the study eye, intraocular corticosteroids or antiangiogenic drugs, those with uncontrolled hypertension, uncontrolled diabetes (HbA1c $> 12\%$ ), recent (within 3 months) cerebrovascular accident or myocardial infarction<br><b>Age:</b> 61.7 to 62.8 SD8.9 to 10.0 (range 21 to 87) years<br><b>Sex:</b> 41.6 to 48% female | <b>Group 1 (IVR0.3, n=125 eyes):</b> 0.3 mg IV ranibizumab<br><b>Group 2 (IVR0.5, n=125 eyes):</b> 0.5 mg IV ranibizumab<br><b>Group 3 (C, n=127 eyes):</b> sham injection<br><b>Regimen for all groups:</b> monthly injections; need for macular rescue laser assessed monthly starting at month 3                                                                                                                                                       | <b>At 24 months BCVA:</b> <table border="1"> <thead> <tr> <th></th> <th>plus <math>\geq 15</math> letters</th> <th>p</th> </tr> </thead> <tbody> <tr> <td><i>IVR0.3</i></td> <td>44.8%</td> <td>&lt;0.0001 vs C</td> </tr> <tr> <td><i>IVR0.5</i></td> <td>39.2%</td> <td>=0.0002 vs C</td> </tr> <tr> <td><i>C</i></td> <td>18.1%</td> <td></td> </tr> </tbody> </table><br><table border="1"> <thead> <tr> <th></th> <th>Loss of <math>&lt; 15</math> letters</th> <th></th> </tr> </thead> <tbody> <tr> <td><i>IVR0.3</i></td> <td>97.6%</td> <td>=0.0086 vs C</td> </tr> <tr> <td><i>IVR0.5</i></td> <td>97.6%</td> <td>=0.0126 vs C</td> </tr> <tr> <td><i>C</i></td> <td>89.8%</td> <td></td> </tr> </tbody> </table>                                                                                                                                                                                                    |  | plus $\geq 15$ letters                             | p | <i>IVR0.3</i>           | 44.8%           | <0.0001 vs C     | <i>IVR0.5</i>      | 39.2%           | =0.0002 vs C     | <i>C</i>            | 18.1%          |  |  | Loss of $< 15$ letters                                |  | <i>IVR0.3</i>           | 97.6%                      | =0.0086 vs C | <i>IVR0.5</i>      | 97.6%                      | =0.0126 vs C | <i>C</i>            | 89.8%                     |  |
|                                                                                                                                                                         | plus $\geq 15$ letters                                                                                                                                                                                                                                                                                                                                                                                                                                                                                                                                                                                                                     | p                                                                                                                                                                                                                                                                                                                                                                                                                                                         |                                                                                                                                                                                                                                                                                                                                                                                                                                                                                                                                                                                                                                                                                                                                                                                                                                                                                                                                |  |                                                    |   |                         |                 |                  |                    |                 |                  |                     |                |  |  |                                                       |  |                         |                            |              |                    |                            |              |                     |                           |  |
| <i>IVR0.3</i>                                                                                                                                                           | 44.8%                                                                                                                                                                                                                                                                                                                                                                                                                                                                                                                                                                                                                                      | <0.0001 vs C                                                                                                                                                                                                                                                                                                                                                                                                                                              |                                                                                                                                                                                                                                                                                                                                                                                                                                                                                                                                                                                                                                                                                                                                                                                                                                                                                                                                |  |                                                    |   |                         |                 |                  |                    |                 |                  |                     |                |  |  |                                                       |  |                         |                            |              |                    |                            |              |                     |                           |  |
| <i>IVR0.5</i>                                                                                                                                                           | 39.2%                                                                                                                                                                                                                                                                                                                                                                                                                                                                                                                                                                                                                                      | =0.0002 vs C                                                                                                                                                                                                                                                                                                                                                                                                                                              |                                                                                                                                                                                                                                                                                                                                                                                                                                                                                                                                                                                                                                                                                                                                                                                                                                                                                                                                |  |                                                    |   |                         |                 |                  |                    |                 |                  |                     |                |  |  |                                                       |  |                         |                            |              |                    |                            |              |                     |                           |  |
| <i>C</i>                                                                                                                                                                | 18.1%                                                                                                                                                                                                                                                                                                                                                                                                                                                                                                                                                                                                                                      |                                                                                                                                                                                                                                                                                                                                                                                                                                                           |                                                                                                                                                                                                                                                                                                                                                                                                                                                                                                                                                                                                                                                                                                                                                                                                                                                                                                                                |  |                                                    |   |                         |                 |                  |                    |                 |                  |                     |                |  |  |                                                       |  |                         |                            |              |                    |                            |              |                     |                           |  |
|                                                                                                                                                                         | Loss of $< 15$ letters                                                                                                                                                                                                                                                                                                                                                                                                                                                                                                                                                                                                                     |                                                                                                                                                                                                                                                                                                                                                                                                                                                           |                                                                                                                                                                                                                                                                                                                                                                                                                                                                                                                                                                                                                                                                                                                                                                                                                                                                                                                                |  |                                                    |   |                         |                 |                  |                    |                 |                  |                     |                |  |  |                                                       |  |                         |                            |              |                    |                            |              |                     |                           |  |
| <i>IVR0.3</i>                                                                                                                                                           | 97.6%                                                                                                                                                                                                                                                                                                                                                                                                                                                                                                                                                                                                                                      | =0.0086 vs C                                                                                                                                                                                                                                                                                                                                                                                                                                              |                                                                                                                                                                                                                                                                                                                                                                                                                                                                                                                                                                                                                                                                                                                                                                                                                                                                                                                                |  |                                                    |   |                         |                 |                  |                    |                 |                  |                     |                |  |  |                                                       |  |                         |                            |              |                    |                            |              |                     |                           |  |
| <i>IVR0.5</i>                                                                                                                                                           | 97.6%                                                                                                                                                                                                                                                                                                                                                                                                                                                                                                                                                                                                                                      | =0.0126 vs C                                                                                                                                                                                                                                                                                                                                                                                                                                              |                                                                                                                                                                                                                                                                                                                                                                                                                                                                                                                                                                                                                                                                                                                                                                                                                                                                                                                                |  |                                                    |   |                         |                 |                  |                    |                 |                  |                     |                |  |  |                                                       |  |                         |                            |              |                    |                            |              |                     |                           |  |
| <i>C</i>                                                                                                                                                                | 89.8%                                                                                                                                                                                                                                                                                                                                                                                                                                                                                                                                                                                                                                      |                                                                                                                                                                                                                                                                                                                                                                                                                                                           |                                                                                                                                                                                                                                                                                                                                                                                                                                                                                                                                                                                                                                                                                                                                                                                                                                                                                                                                |  |                                                    |   |                         |                 |                  |                    |                 |                  |                     |                |  |  |                                                       |  |                         |                            |              |                    |                            |              |                     |                           |  |

| Study                                                                                                                                                                                  | Participants and baseline values                                                                                                                                                                                                                                                                                                                                                                                                                                                                                                                                                                                                                                                                                                                                                         | Intervention                                                                                                                                                                                                                                                                                  | Outcome (change from baseline at study end)                                                                                                                                                                                                                                                                                                                                                                                                                                                                                                                                                                                                                                                                                                                                                                                                                                                                                                                                         |               |                      |              |               |       |               |               |       |               |               |              |              |               |              |              |               |             |             |          |                           |   |               |                |              |               |                |              |          |                |  |
|----------------------------------------------------------------------------------------------------------------------------------------------------------------------------------------|------------------------------------------------------------------------------------------------------------------------------------------------------------------------------------------------------------------------------------------------------------------------------------------------------------------------------------------------------------------------------------------------------------------------------------------------------------------------------------------------------------------------------------------------------------------------------------------------------------------------------------------------------------------------------------------------------------------------------------------------------------------------------------------|-----------------------------------------------------------------------------------------------------------------------------------------------------------------------------------------------------------------------------------------------------------------------------------------------|-------------------------------------------------------------------------------------------------------------------------------------------------------------------------------------------------------------------------------------------------------------------------------------------------------------------------------------------------------------------------------------------------------------------------------------------------------------------------------------------------------------------------------------------------------------------------------------------------------------------------------------------------------------------------------------------------------------------------------------------------------------------------------------------------------------------------------------------------------------------------------------------------------------------------------------------------------------------------------------|---------------|----------------------|--------------|---------------|-------|---------------|---------------|-------|---------------|---------------|--------------|--------------|---------------|--------------|--------------|---------------|-------------|-------------|----------|---------------------------|---|---------------|----------------|--------------|---------------|----------------|--------------|----------|----------------|--|
|                                                                                                                                                                                        | <p><b>Diabetes type:</b> type 1 or 2<br/> <b>HbA1c:</b> 7.7% SD 1.4 to 1.5; ≤8% (65 to 68.3%); &gt;8% (31.7% to 35%)<br/> <b>Baseline VA:</b> Mean ETDRS letter score 54.7 to 57.2; ≤20/200 (7.9 to 13.6%); &gt;20/200 but &lt;20/40 (72.4 to 72.8%); ≥20/40 (13.6 to 19.7%)<br/> <b>Baseline CMT:</b> 463.8 to 474.5 μm<br/> <b>Comorbidities:</b> History of smoking 46.4 to 51.2%</p>                                                                                                                                                                                                                                                                                                                                                                                                 |                                                                                                                                                                                                                                                                                               | <p><b>Snellen equivalent of 20/40 or better</b></p> <table border="1"> <tr> <td><i>IVR0.3</i></td> <td>60.0%</td> <td>&lt;0.0001 vs C</td> </tr> <tr> <td><i>IVR0.5</i></td> <td>63.2%</td> <td>&lt;0.0001 vs C</td> </tr> <tr> <td><i>C</i></td> <td>37.8%</td> <td></td> </tr> </table> <p><b>Mean BCVA gain (letters)</b></p> <table border="1"> <tr> <td><i>IVR0.3</i></td> <td>+12.5 SD14.1</td> <td>&lt;0.0001 vs C</td> </tr> <tr> <td><i>IVR0.5</i></td> <td>+11.9 SD12.1</td> <td>&lt;0.0001 vs C</td> </tr> <tr> <td><i>C</i></td> <td>+2.6 SD13.9</td> <td></td> </tr> </table> <p><b>CFT:</b></p> <table border="1"> <thead> <tr> <th></th> <th>Mean change from baseline</th> <th>p</th> </tr> </thead> <tbody> <tr> <td><i>IVR0.3</i></td> <td>-250.6 SD212.2</td> <td>&lt;0.0001 vs C</td> </tr> <tr> <td><i>IVR0.5</i></td> <td>-253.1 SD183.7</td> <td>&lt;0.0001 vs C</td> </tr> <tr> <td><i>C</i></td> <td>-133.4 SD209.0</td> <td></td> </tr> </tbody> </table> | <i>IVR0.3</i> | 60.0%                | <0.0001 vs C | <i>IVR0.5</i> | 63.2% | <0.0001 vs C  | <i>C</i>      | 37.8% |               | <i>IVR0.3</i> | +12.5 SD14.1 | <0.0001 vs C | <i>IVR0.5</i> | +11.9 SD12.1 | <0.0001 vs C | <i>C</i>      | +2.6 SD13.9 |             |          | Mean change from baseline | p | <i>IVR0.3</i> | -250.6 SD212.2 | <0.0001 vs C | <i>IVR0.5</i> | -253.1 SD183.7 | <0.0001 vs C | <i>C</i> | -133.4 SD209.0 |  |
| <i>IVR0.3</i>                                                                                                                                                                          | 60.0%                                                                                                                                                                                                                                                                                                                                                                                                                                                                                                                                                                                                                                                                                                                                                                                    | <0.0001 vs C                                                                                                                                                                                                                                                                                  |                                                                                                                                                                                                                                                                                                                                                                                                                                                                                                                                                                                                                                                                                                                                                                                                                                                                                                                                                                                     |               |                      |              |               |       |               |               |       |               |               |              |              |               |              |              |               |             |             |          |                           |   |               |                |              |               |                |              |          |                |  |
| <i>IVR0.5</i>                                                                                                                                                                          | 63.2%                                                                                                                                                                                                                                                                                                                                                                                                                                                                                                                                                                                                                                                                                                                                                                                    | <0.0001 vs C                                                                                                                                                                                                                                                                                  |                                                                                                                                                                                                                                                                                                                                                                                                                                                                                                                                                                                                                                                                                                                                                                                                                                                                                                                                                                                     |               |                      |              |               |       |               |               |       |               |               |              |              |               |              |              |               |             |             |          |                           |   |               |                |              |               |                |              |          |                |  |
| <i>C</i>                                                                                                                                                                               | 37.8%                                                                                                                                                                                                                                                                                                                                                                                                                                                                                                                                                                                                                                                                                                                                                                                    |                                                                                                                                                                                                                                                                                               |                                                                                                                                                                                                                                                                                                                                                                                                                                                                                                                                                                                                                                                                                                                                                                                                                                                                                                                                                                                     |               |                      |              |               |       |               |               |       |               |               |              |              |               |              |              |               |             |             |          |                           |   |               |                |              |               |                |              |          |                |  |
| <i>IVR0.3</i>                                                                                                                                                                          | +12.5 SD14.1                                                                                                                                                                                                                                                                                                                                                                                                                                                                                                                                                                                                                                                                                                                                                                             | <0.0001 vs C                                                                                                                                                                                                                                                                                  |                                                                                                                                                                                                                                                                                                                                                                                                                                                                                                                                                                                                                                                                                                                                                                                                                                                                                                                                                                                     |               |                      |              |               |       |               |               |       |               |               |              |              |               |              |              |               |             |             |          |                           |   |               |                |              |               |                |              |          |                |  |
| <i>IVR0.5</i>                                                                                                                                                                          | +11.9 SD12.1                                                                                                                                                                                                                                                                                                                                                                                                                                                                                                                                                                                                                                                                                                                                                                             | <0.0001 vs C                                                                                                                                                                                                                                                                                  |                                                                                                                                                                                                                                                                                                                                                                                                                                                                                                                                                                                                                                                                                                                                                                                                                                                                                                                                                                                     |               |                      |              |               |       |               |               |       |               |               |              |              |               |              |              |               |             |             |          |                           |   |               |                |              |               |                |              |          |                |  |
| <i>C</i>                                                                                                                                                                               | +2.6 SD13.9                                                                                                                                                                                                                                                                                                                                                                                                                                                                                                                                                                                                                                                                                                                                                                              |                                                                                                                                                                                                                                                                                               |                                                                                                                                                                                                                                                                                                                                                                                                                                                                                                                                                                                                                                                                                                                                                                                                                                                                                                                                                                                     |               |                      |              |               |       |               |               |       |               |               |              |              |               |              |              |               |             |             |          |                           |   |               |                |              |               |                |              |          |                |  |
|                                                                                                                                                                                        | Mean change from baseline                                                                                                                                                                                                                                                                                                                                                                                                                                                                                                                                                                                                                                                                                                                                                                | p                                                                                                                                                                                                                                                                                             |                                                                                                                                                                                                                                                                                                                                                                                                                                                                                                                                                                                                                                                                                                                                                                                                                                                                                                                                                                                     |               |                      |              |               |       |               |               |       |               |               |              |              |               |              |              |               |             |             |          |                           |   |               |                |              |               |                |              |          |                |  |
| <i>IVR0.3</i>                                                                                                                                                                          | -250.6 SD212.2                                                                                                                                                                                                                                                                                                                                                                                                                                                                                                                                                                                                                                                                                                                                                                           | <0.0001 vs C                                                                                                                                                                                                                                                                                  |                                                                                                                                                                                                                                                                                                                                                                                                                                                                                                                                                                                                                                                                                                                                                                                                                                                                                                                                                                                     |               |                      |              |               |       |               |               |       |               |               |              |              |               |              |              |               |             |             |          |                           |   |               |                |              |               |                |              |          |                |  |
| <i>IVR0.5</i>                                                                                                                                                                          | -253.1 SD183.7                                                                                                                                                                                                                                                                                                                                                                                                                                                                                                                                                                                                                                                                                                                                                                           | <0.0001 vs C                                                                                                                                                                                                                                                                                  |                                                                                                                                                                                                                                                                                                                                                                                                                                                                                                                                                                                                                                                                                                                                                                                                                                                                                                                                                                                     |               |                      |              |               |       |               |               |       |               |               |              |              |               |              |              |               |             |             |          |                           |   |               |                |              |               |                |              |          |                |  |
| <i>C</i>                                                                                                                                                                               | -133.4 SD209.0                                                                                                                                                                                                                                                                                                                                                                                                                                                                                                                                                                                                                                                                                                                                                                           |                                                                                                                                                                                                                                                                                               |                                                                                                                                                                                                                                                                                                                                                                                                                                                                                                                                                                                                                                                                                                                                                                                                                                                                                                                                                                                     |               |                      |              |               |       |               |               |       |               |               |              |              |               |              |              |               |             |             |          |                           |   |               |                |              |               |                |              |          |                |  |
| <p><b>RIDE study (Boyer 2011/Nguyen 2012)[38,140] USA</b><br/>           Multicentre</p> <p><b>Design:</b> 3-arm double-blind sham-controlled RCT<br/> <b>Follow-up:</b> 24 months</p> | <p><b>N:</b> 382 eyes<br/> <b>Inclusion criteria:</b> ≥18 years, type 1 or 2 diabetes, BCVA 20/40-20/320 and DMO CMT ≥275 μm<br/> <b>Exclusion criteria:</b> prior vitreoretinal surgery, recent history (within 3 months of screening) of panretinal or macular laser in the study eye, intraocular corticosteroids or antiangiogenic drugs, those with uncontrolled hypertension, uncontrolled diabetes (HbA1c &gt;12%), recent (within 3 months) cerebrovascular accident or myocardial infarction<br/> <b>Age:</b> 61.8 to 63.5 (range 22 to 91) years<br/> <b>Sex:</b> 37 to 49.1% female<br/> <b>Diabetes type:</b> type 1 or 2<br/> <b>HbA1c:</b> 7.6 SD1.3 to 1.5; ≤8% (65.8 to 67.5%); &gt;8% (32.5 to 34.2%)<br/> <b>Baseline VA:</b> Mean ETDRS letter score 56.9 to 57.5</p> | <p><b>Group 1 (IVR0.3, n=125 eyes):</b> 0.3 mg IV ranibizumab<br/> <b>Group 2 (IVR0.5, n=127 eyes):</b> 0.5 mg IV ranibizumab<br/> <b>Group 3 (C, n=130 eyes):</b> sham injection<br/> <b>Regimen for all groups:</b> Patients were eligible for rescue macular laser starting at Month 3</p> | <p><b>At 24 months BCVA:</b></p> <table border="1"> <thead> <tr> <th></th> <th>More than 15 letters</th> <th>p</th> </tr> </thead> <tbody> <tr> <td><i>IVR0.3</i></td> <td>33.6%</td> <td>&lt;0.0001 vs. C</td> </tr> <tr> <td><i>IVR0.5</i></td> <td>45.7%</td> <td>&lt;0.0001 vs. C</td> </tr> <tr> <td><i>C</i></td> <td>12.3%</td> <td></td> </tr> </tbody> </table> <p><b>Less than 15 letters</b></p> <table border="1"> <tr> <td><i>IVR0.3</i></td> <td>1.6%</td> <td>&gt;0.05 vs C</td> </tr> <tr> <td><i>IVR0.5</i></td> <td>3.9%</td> <td>&lt;0.05 vs. C</td> </tr> <tr> <td><i>C</i></td> <td>8.5%</td> <td></td> </tr> </table> <p><b>Snellen equivalent of 20/40 or better</b></p> <table border="1"> <tr> <td><i>IVR0.3</i></td> <td>54.4%</td> <td>=0.0002 vs C</td> </tr> </table>                                                                                                                                                                                  |               | More than 15 letters | p            | <i>IVR0.3</i> | 33.6% | <0.0001 vs. C | <i>IVR0.5</i> | 45.7% | <0.0001 vs. C | <i>C</i>      | 12.3%        |              | <i>IVR0.3</i> | 1.6%         | >0.05 vs C   | <i>IVR0.5</i> | 3.9%        | <0.05 vs. C | <i>C</i> | 8.5%                      |   | <i>IVR0.3</i> | 54.4%          | =0.0002 vs C |               |                |              |          |                |  |
|                                                                                                                                                                                        | More than 15 letters                                                                                                                                                                                                                                                                                                                                                                                                                                                                                                                                                                                                                                                                                                                                                                     | p                                                                                                                                                                                                                                                                                             |                                                                                                                                                                                                                                                                                                                                                                                                                                                                                                                                                                                                                                                                                                                                                                                                                                                                                                                                                                                     |               |                      |              |               |       |               |               |       |               |               |              |              |               |              |              |               |             |             |          |                           |   |               |                |              |               |                |              |          |                |  |
| <i>IVR0.3</i>                                                                                                                                                                          | 33.6%                                                                                                                                                                                                                                                                                                                                                                                                                                                                                                                                                                                                                                                                                                                                                                                    | <0.0001 vs. C                                                                                                                                                                                                                                                                                 |                                                                                                                                                                                                                                                                                                                                                                                                                                                                                                                                                                                                                                                                                                                                                                                                                                                                                                                                                                                     |               |                      |              |               |       |               |               |       |               |               |              |              |               |              |              |               |             |             |          |                           |   |               |                |              |               |                |              |          |                |  |
| <i>IVR0.5</i>                                                                                                                                                                          | 45.7%                                                                                                                                                                                                                                                                                                                                                                                                                                                                                                                                                                                                                                                                                                                                                                                    | <0.0001 vs. C                                                                                                                                                                                                                                                                                 |                                                                                                                                                                                                                                                                                                                                                                                                                                                                                                                                                                                                                                                                                                                                                                                                                                                                                                                                                                                     |               |                      |              |               |       |               |               |       |               |               |              |              |               |              |              |               |             |             |          |                           |   |               |                |              |               |                |              |          |                |  |
| <i>C</i>                                                                                                                                                                               | 12.3%                                                                                                                                                                                                                                                                                                                                                                                                                                                                                                                                                                                                                                                                                                                                                                                    |                                                                                                                                                                                                                                                                                               |                                                                                                                                                                                                                                                                                                                                                                                                                                                                                                                                                                                                                                                                                                                                                                                                                                                                                                                                                                                     |               |                      |              |               |       |               |               |       |               |               |              |              |               |              |              |               |             |             |          |                           |   |               |                |              |               |                |              |          |                |  |
| <i>IVR0.3</i>                                                                                                                                                                          | 1.6%                                                                                                                                                                                                                                                                                                                                                                                                                                                                                                                                                                                                                                                                                                                                                                                     | >0.05 vs C                                                                                                                                                                                                                                                                                    |                                                                                                                                                                                                                                                                                                                                                                                                                                                                                                                                                                                                                                                                                                                                                                                                                                                                                                                                                                                     |               |                      |              |               |       |               |               |       |               |               |              |              |               |              |              |               |             |             |          |                           |   |               |                |              |               |                |              |          |                |  |
| <i>IVR0.5</i>                                                                                                                                                                          | 3.9%                                                                                                                                                                                                                                                                                                                                                                                                                                                                                                                                                                                                                                                                                                                                                                                     | <0.05 vs. C                                                                                                                                                                                                                                                                                   |                                                                                                                                                                                                                                                                                                                                                                                                                                                                                                                                                                                                                                                                                                                                                                                                                                                                                                                                                                                     |               |                      |              |               |       |               |               |       |               |               |              |              |               |              |              |               |             |             |          |                           |   |               |                |              |               |                |              |          |                |  |
| <i>C</i>                                                                                                                                                                               | 8.5%                                                                                                                                                                                                                                                                                                                                                                                                                                                                                                                                                                                                                                                                                                                                                                                     |                                                                                                                                                                                                                                                                                               |                                                                                                                                                                                                                                                                                                                                                                                                                                                                                                                                                                                                                                                                                                                                                                                                                                                                                                                                                                                     |               |                      |              |               |       |               |               |       |               |               |              |              |               |              |              |               |             |             |          |                           |   |               |                |              |               |                |              |          |                |  |
| <i>IVR0.3</i>                                                                                                                                                                          | 54.4%                                                                                                                                                                                                                                                                                                                                                                                                                                                                                                                                                                                                                                                                                                                                                                                    | =0.0002 vs C                                                                                                                                                                                                                                                                                  |                                                                                                                                                                                                                                                                                                                                                                                                                                                                                                                                                                                                                                                                                                                                                                                                                                                                                                                                                                                     |               |                      |              |               |       |               |               |       |               |               |              |              |               |              |              |               |             |             |          |                           |   |               |                |              |               |                |              |          |                |  |

| Study                           | Participants and baseline values                                                   | Intervention | Outcome (change from baseline at study end)                                                                                                                                                                                                                                                                                                                                                                                                                                                                                                                                                                                                                                                                                                                                                                                                                                                                     |               |       |              |          |       |  |                                 |  |  |               |              |              |               |              |              |          |             |  |             |  |  |  |                                  |          |               |                |              |               |                |              |          |                |  |
|---------------------------------|------------------------------------------------------------------------------------|--------------|-----------------------------------------------------------------------------------------------------------------------------------------------------------------------------------------------------------------------------------------------------------------------------------------------------------------------------------------------------------------------------------------------------------------------------------------------------------------------------------------------------------------------------------------------------------------------------------------------------------------------------------------------------------------------------------------------------------------------------------------------------------------------------------------------------------------------------------------------------------------------------------------------------------------|---------------|-------|--------------|----------|-------|--|---------------------------------|--|--|---------------|--------------|--------------|---------------|--------------|--------------|----------|-------------|--|-------------|--|--|--|----------------------------------|----------|---------------|----------------|--------------|---------------|----------------|--------------|----------|----------------|--|
|                                 | Baseline CMT: 447.4 to 482.6 µm<br>Comorbidities: history of smoking 33.6 to 51.6% |              | <table border="1"> <tr> <td><i>IVR0.5</i></td> <td>62.2%</td> <td>&lt;0.0001 vs C</td> </tr> <tr> <td><i>C</i></td> <td>34.6%</td> <td></td> </tr> <tr> <td colspan="3" style="text-align: center;"><b>Mean BCVA gain (letters)</b></td> </tr> <tr> <td><i>IVR0.3</i></td> <td>+10.9 SD10.4</td> <td>&lt;0.0001 vs C</td> </tr> <tr> <td><i>IVR0.5</i></td> <td>+12.0 SD14.9</td> <td>&lt;0.0001 vs C</td> </tr> <tr> <td><i>C</i></td> <td>+2.3 SD14.2</td> <td></td> </tr> <tr> <td colspan="3"><b>CMT:</b></td> </tr> <tr> <td></td> <td style="text-align: center;"><b>Mean change from baseline</b></td> <td style="text-align: center;"><b>p</b></td> </tr> <tr> <td><i>IVR0.3</i></td> <td>-259.8 SD169.3</td> <td>&lt;0.0001 vs C</td> </tr> <tr> <td><i>IVR0.5</i></td> <td>-270.7 SD201.6</td> <td>&lt;0.0001 vs C</td> </tr> <tr> <td><i>C</i></td> <td>-125.8 SD198.3</td> <td></td> </tr> </table> | <i>IVR0.5</i> | 62.2% | <0.0001 vs C | <i>C</i> | 34.6% |  | <b>Mean BCVA gain (letters)</b> |  |  | <i>IVR0.3</i> | +10.9 SD10.4 | <0.0001 vs C | <i>IVR0.5</i> | +12.0 SD14.9 | <0.0001 vs C | <i>C</i> | +2.3 SD14.2 |  | <b>CMT:</b> |  |  |  | <b>Mean change from baseline</b> | <b>p</b> | <i>IVR0.3</i> | -259.8 SD169.3 | <0.0001 vs C | <i>IVR0.5</i> | -270.7 SD201.6 | <0.0001 vs C | <i>C</i> | -125.8 SD198.3 |  |
| <i>IVR0.5</i>                   | 62.2%                                                                              | <0.0001 vs C |                                                                                                                                                                                                                                                                                                                                                                                                                                                                                                                                                                                                                                                                                                                                                                                                                                                                                                                 |               |       |              |          |       |  |                                 |  |  |               |              |              |               |              |              |          |             |  |             |  |  |  |                                  |          |               |                |              |               |                |              |          |                |  |
| <i>C</i>                        | 34.6%                                                                              |              |                                                                                                                                                                                                                                                                                                                                                                                                                                                                                                                                                                                                                                                                                                                                                                                                                                                                                                                 |               |       |              |          |       |  |                                 |  |  |               |              |              |               |              |              |          |             |  |             |  |  |  |                                  |          |               |                |              |               |                |              |          |                |  |
| <b>Mean BCVA gain (letters)</b> |                                                                                    |              |                                                                                                                                                                                                                                                                                                                                                                                                                                                                                                                                                                                                                                                                                                                                                                                                                                                                                                                 |               |       |              |          |       |  |                                 |  |  |               |              |              |               |              |              |          |             |  |             |  |  |  |                                  |          |               |                |              |               |                |              |          |                |  |
| <i>IVR0.3</i>                   | +10.9 SD10.4                                                                       | <0.0001 vs C |                                                                                                                                                                                                                                                                                                                                                                                                                                                                                                                                                                                                                                                                                                                                                                                                                                                                                                                 |               |       |              |          |       |  |                                 |  |  |               |              |              |               |              |              |          |             |  |             |  |  |  |                                  |          |               |                |              |               |                |              |          |                |  |
| <i>IVR0.5</i>                   | +12.0 SD14.9                                                                       | <0.0001 vs C |                                                                                                                                                                                                                                                                                                                                                                                                                                                                                                                                                                                                                                                                                                                                                                                                                                                                                                                 |               |       |              |          |       |  |                                 |  |  |               |              |              |               |              |              |          |             |  |             |  |  |  |                                  |          |               |                |              |               |                |              |          |                |  |
| <i>C</i>                        | +2.3 SD14.2                                                                        |              |                                                                                                                                                                                                                                                                                                                                                                                                                                                                                                                                                                                                                                                                                                                                                                                                                                                                                                                 |               |       |              |          |       |  |                                 |  |  |               |              |              |               |              |              |          |             |  |             |  |  |  |                                  |          |               |                |              |               |                |              |          |                |  |
| <b>CMT:</b>                     |                                                                                    |              |                                                                                                                                                                                                                                                                                                                                                                                                                                                                                                                                                                                                                                                                                                                                                                                                                                                                                                                 |               |       |              |          |       |  |                                 |  |  |               |              |              |               |              |              |          |             |  |             |  |  |  |                                  |          |               |                |              |               |                |              |          |                |  |
|                                 | <b>Mean change from baseline</b>                                                   | <b>p</b>     |                                                                                                                                                                                                                                                                                                                                                                                                                                                                                                                                                                                                                                                                                                                                                                                                                                                                                                                 |               |       |              |          |       |  |                                 |  |  |               |              |              |               |              |              |          |             |  |             |  |  |  |                                  |          |               |                |              |               |                |              |          |                |  |
| <i>IVR0.3</i>                   | -259.8 SD169.3                                                                     | <0.0001 vs C |                                                                                                                                                                                                                                                                                                                                                                                                                                                                                                                                                                                                                                                                                                                                                                                                                                                                                                                 |               |       |              |          |       |  |                                 |  |  |               |              |              |               |              |              |          |             |  |             |  |  |  |                                  |          |               |                |              |               |                |              |          |                |  |
| <i>IVR0.5</i>                   | -270.7 SD201.6                                                                     | <0.0001 vs C |                                                                                                                                                                                                                                                                                                                                                                                                                                                                                                                                                                                                                                                                                                                                                                                                                                                                                                                 |               |       |              |          |       |  |                                 |  |  |               |              |              |               |              |              |          |             |  |             |  |  |  |                                  |          |               |                |              |               |                |              |          |                |  |
| <i>C</i>                        | -125.8 SD198.3                                                                     |              |                                                                                                                                                                                                                                                                                                                                                                                                                                                                                                                                                                                                                                                                                                                                                                                                                                                                                                                 |               |       |              |          |       |  |                                 |  |  |               |              |              |               |              |              |          |             |  |             |  |  |  |                                  |          |               |                |              |               |                |              |          |                |  |

**Abbreviations:** BCVA – best corrected visual acuity, CMT – central macular thickness, DM – diabetes mellitus, DMO – diabetic macular oedema, DP – diastolic pressure, DR – diabetic retinopathy, HR QoL – health-related quality of life, IOP – intraocular pressure, IQR – interquartile range, IV – intravitreal, NEI VFQ-25 – National Eye Institute Visual Function Questionnaire-25, NPDR – nonproliferative diabetic retinopathy, NR – not reported, OCT – optical coherence tomography, PDR – proliferative diabetic retinopathy, PRP – panretinal photocoagulation, RCT – randomized controlled trial, SD – standard deviation, SP – systolic pressure, VA – visual acuity, VEGF – vascular endothelia growth factor, vs – versus, CSME – clinically significant macular oedema, MLT/MPC – macular laser therapy/macular photocoagulation, IVR – intravitreal ranibizumab, IVB – intravitreal bevacizumab, IVP – intravitreal pegaptanib, IVVTE – intravitreal VEGF Trap Eye, C - control, DIL - dexamethasone followed by laser, DDS - dexamethasone, SRFA – fluocinolone, SOC – standard of care, IVT - intravitreal triamcinolone, L – laser, IVTL intravitreal triamcinolone plus laser **Notes:** injections are intravitreal unless otherwise noted



Table 4: Bevacizumab studies

| Study                                                                                                                                   | Participants and baseline values                                                                                                                                                                                                                                                                                                                                                                                                                                                                                                                                                                                                                                                                                                                                                                                                                                                                                                                                                                                                                                                                                                                                                                                                                                                                                                                                                                                                                                                                                                                                                                                                                                                                                                                                       | Intervention                                                                                                                                                                                                                                                                                                                                                                                                                                                                                          | Outcome (change from baseline at study end)                                                                                                                                                                                                                                                                                                                                                                                                                                                                                                                                                                                                                                                                                                                                                                                                                                                                                                                  |  |                |   |            |             |  |            |            |              |  |              |             |   |            |    |    |  |            |     |     |                              |  |                     |   |            |            |  |            |            |             |
|-----------------------------------------------------------------------------------------------------------------------------------------|------------------------------------------------------------------------------------------------------------------------------------------------------------------------------------------------------------------------------------------------------------------------------------------------------------------------------------------------------------------------------------------------------------------------------------------------------------------------------------------------------------------------------------------------------------------------------------------------------------------------------------------------------------------------------------------------------------------------------------------------------------------------------------------------------------------------------------------------------------------------------------------------------------------------------------------------------------------------------------------------------------------------------------------------------------------------------------------------------------------------------------------------------------------------------------------------------------------------------------------------------------------------------------------------------------------------------------------------------------------------------------------------------------------------------------------------------------------------------------------------------------------------------------------------------------------------------------------------------------------------------------------------------------------------------------------------------------------------------------------------------------------------|-------------------------------------------------------------------------------------------------------------------------------------------------------------------------------------------------------------------------------------------------------------------------------------------------------------------------------------------------------------------------------------------------------------------------------------------------------------------------------------------------------|--------------------------------------------------------------------------------------------------------------------------------------------------------------------------------------------------------------------------------------------------------------------------------------------------------------------------------------------------------------------------------------------------------------------------------------------------------------------------------------------------------------------------------------------------------------------------------------------------------------------------------------------------------------------------------------------------------------------------------------------------------------------------------------------------------------------------------------------------------------------------------------------------------------------------------------------------------------|--|----------------|---|------------|-------------|--|------------|------------|--------------|--|--------------|-------------|---|------------|----|----|--|------------|-----|-----|------------------------------|--|---------------------|---|------------|------------|--|------------|------------|-------------|
| <b>BOLT Study (Michaelides 2010/ Rajendram 2012)</b><br>[23,52,85]<br>UK<br><br><b>Design:</b> 2-arm RCT<br><b>Follow-up:</b> 12 months | <b>N:</b> 80 eyes of 80 patients<br><b>Inclusion criteria:</b> ≥18 years, type 1 or 2 DM, BCVA in the study eye 35 to 69 ETDRS letters at 4 m (≥6/60 or ≤6/12), center-involving clinically significant DMO with CMT ≥270 μm; media clarity, papillary dilation and cooperation sufficient for adequate fundus imaging; a least 1 prior macular laser therapy; IOP <30 mmHg; fellow eye BCVA ≥3/60; fellow eye received no anti-VEGF in past 3 months and no expectation of such therapy<br><b>Exclusion criteria:</b> (ocular for study eye) macular ischemia, macular oedema due to causes other than DMO, coexistent ocular disease affecting VA or DMO, any treatment for DMO in prior 3 months, PRP within 3 months prior to randomization or anticipated, PDR, HbA1c >11.0%, medical history of chronic renal failure; any thromboembolic event within 6 months prior to randomization, unstable angina, evidence of active ischemia on ECG; major surgery within 28 days of randomization or planned; participation in an investigational drug trial; systemic anti-VEGF or pro-VEGF treatment within 3 months of enrollment; pregnancy, lactation; intraocular surgery within 3 months of randomization; aphakia; uncontrolled glaucoma; significant external ocular disease<br><b>Age:</b> 64.2 SD8.8 years<br><b>Sex:</b> 31% female<br><b>Diabetes type:</b> 90% type 2 DM, 10% type 1 DM<br><b>HbA1c:</b> 7.5 to 7.6 SD1.2 to 1.4%<br><b>Baseline VA:</b> ETDRS letter score 54.6 to 55.7 SD8.6 to 9.7<br><b>Baseline CMT:</b> 481 to 507 SD121 to 145 μm<br><b>Comorbidities:</b> 19% mild NPDR (level 35), 46% moderate NPDR (level 43), 19% moderately severe NPDR (level 47), 13% severe NPDR (level 53), 3% moderate PDR (level 65), 79 to 88% phakic | <b>Group 1 (MLT, n=38 eyes):</b> modified ETDRS macular laser therapy; reviewed every 4 months up to 52 weeks; retreatment performed if clinically indicated by ETDRS guidelines (median 4 laser treatments)<br><b>Group 2 (IVB, n=42 eyes):</b> 1.25 mg (0.05 ml) IV bevacizumab at baseline, 6 and 12 weeks; subsequent IVB injections (up to 52 weeks) guided by an OCT-based retreatment protocol (median 13 injections)<br><b>Laser Modified ETDRS protocol, retreatment by ETDRS guidelines</b> | <b>At 24 months</b><br><b>BCVA (ETDRS):</b><br><table border="1"> <thead> <tr> <th></th> <th>BCVA.mean (SD)</th> <th>p</th> </tr> </thead> <tbody> <tr> <td><i>MLT</i></td> <td>-0.5 (10.6)</td> <td></td> </tr> <tr> <td><i>IVB</i></td> <td>+8.6 (9.1)</td> <td>0.005 vs MLT</td> </tr> </tbody> </table><br><b>BCVA gain categories (letters)</b><br><table border="1"> <thead> <tr> <th></th> <th>gaining ≥10:</th> <th>losing &gt;15:</th> <th>p</th> </tr> </thead> <tbody> <tr> <td><i>MLT</i></td> <td>7%</td> <td>4%</td> <td></td> </tr> <tr> <td><i>IVB</i></td> <td>49%</td> <td>32%</td> <td>0.001 vs MLT<br/>0.004 vs MLT</td> </tr> </tbody> </table><br><b>CMT (OCT):</b><br><table border="1"> <thead> <tr> <th></th> <th>CMT (μm, quartiles)</th> <th>p</th> </tr> </thead> <tbody> <tr> <td><i>MLT</i></td> <td>-118 SD171</td> <td></td> </tr> <tr> <td><i>IVB</i></td> <td>-146 SD122</td> <td>0.62 vs MLT</td> </tr> </tbody> </table> |  | BCVA.mean (SD) | p | <i>MLT</i> | -0.5 (10.6) |  | <i>IVB</i> | +8.6 (9.1) | 0.005 vs MLT |  | gaining ≥10: | losing >15: | p | <i>MLT</i> | 7% | 4% |  | <i>IVB</i> | 49% | 32% | 0.001 vs MLT<br>0.004 vs MLT |  | CMT (μm, quartiles) | p | <i>MLT</i> | -118 SD171 |  | <i>IVB</i> | -146 SD122 | 0.62 vs MLT |
|                                                                                                                                         | BCVA.mean (SD)                                                                                                                                                                                                                                                                                                                                                                                                                                                                                                                                                                                                                                                                                                                                                                                                                                                                                                                                                                                                                                                                                                                                                                                                                                                                                                                                                                                                                                                                                                                                                                                                                                                                                                                                                         | p                                                                                                                                                                                                                                                                                                                                                                                                                                                                                                     |                                                                                                                                                                                                                                                                                                                                                                                                                                                                                                                                                                                                                                                                                                                                                                                                                                                                                                                                                              |  |                |   |            |             |  |            |            |              |  |              |             |   |            |    |    |  |            |     |     |                              |  |                     |   |            |            |  |            |            |             |
| <i>MLT</i>                                                                                                                              | -0.5 (10.6)                                                                                                                                                                                                                                                                                                                                                                                                                                                                                                                                                                                                                                                                                                                                                                                                                                                                                                                                                                                                                                                                                                                                                                                                                                                                                                                                                                                                                                                                                                                                                                                                                                                                                                                                                            |                                                                                                                                                                                                                                                                                                                                                                                                                                                                                                       |                                                                                                                                                                                                                                                                                                                                                                                                                                                                                                                                                                                                                                                                                                                                                                                                                                                                                                                                                              |  |                |   |            |             |  |            |            |              |  |              |             |   |            |    |    |  |            |     |     |                              |  |                     |   |            |            |  |            |            |             |
| <i>IVB</i>                                                                                                                              | +8.6 (9.1)                                                                                                                                                                                                                                                                                                                                                                                                                                                                                                                                                                                                                                                                                                                                                                                                                                                                                                                                                                                                                                                                                                                                                                                                                                                                                                                                                                                                                                                                                                                                                                                                                                                                                                                                                             | 0.005 vs MLT                                                                                                                                                                                                                                                                                                                                                                                                                                                                                          |                                                                                                                                                                                                                                                                                                                                                                                                                                                                                                                                                                                                                                                                                                                                                                                                                                                                                                                                                              |  |                |   |            |             |  |            |            |              |  |              |             |   |            |    |    |  |            |     |     |                              |  |                     |   |            |            |  |            |            |             |
|                                                                                                                                         | gaining ≥10:                                                                                                                                                                                                                                                                                                                                                                                                                                                                                                                                                                                                                                                                                                                                                                                                                                                                                                                                                                                                                                                                                                                                                                                                                                                                                                                                                                                                                                                                                                                                                                                                                                                                                                                                                           | losing >15:                                                                                                                                                                                                                                                                                                                                                                                                                                                                                           | p                                                                                                                                                                                                                                                                                                                                                                                                                                                                                                                                                                                                                                                                                                                                                                                                                                                                                                                                                            |  |                |   |            |             |  |            |            |              |  |              |             |   |            |    |    |  |            |     |     |                              |  |                     |   |            |            |  |            |            |             |
| <i>MLT</i>                                                                                                                              | 7%                                                                                                                                                                                                                                                                                                                                                                                                                                                                                                                                                                                                                                                                                                                                                                                                                                                                                                                                                                                                                                                                                                                                                                                                                                                                                                                                                                                                                                                                                                                                                                                                                                                                                                                                                                     | 4%                                                                                                                                                                                                                                                                                                                                                                                                                                                                                                    |                                                                                                                                                                                                                                                                                                                                                                                                                                                                                                                                                                                                                                                                                                                                                                                                                                                                                                                                                              |  |                |   |            |             |  |            |            |              |  |              |             |   |            |    |    |  |            |     |     |                              |  |                     |   |            |            |  |            |            |             |
| <i>IVB</i>                                                                                                                              | 49%                                                                                                                                                                                                                                                                                                                                                                                                                                                                                                                                                                                                                                                                                                                                                                                                                                                                                                                                                                                                                                                                                                                                                                                                                                                                                                                                                                                                                                                                                                                                                                                                                                                                                                                                                                    | 32%                                                                                                                                                                                                                                                                                                                                                                                                                                                                                                   | 0.001 vs MLT<br>0.004 vs MLT                                                                                                                                                                                                                                                                                                                                                                                                                                                                                                                                                                                                                                                                                                                                                                                                                                                                                                                                 |  |                |   |            |             |  |            |            |              |  |              |             |   |            |    |    |  |            |     |     |                              |  |                     |   |            |            |  |            |            |             |
|                                                                                                                                         | CMT (μm, quartiles)                                                                                                                                                                                                                                                                                                                                                                                                                                                                                                                                                                                                                                                                                                                                                                                                                                                                                                                                                                                                                                                                                                                                                                                                                                                                                                                                                                                                                                                                                                                                                                                                                                                                                                                                                    | p                                                                                                                                                                                                                                                                                                                                                                                                                                                                                                     |                                                                                                                                                                                                                                                                                                                                                                                                                                                                                                                                                                                                                                                                                                                                                                                                                                                                                                                                                              |  |                |   |            |             |  |            |            |              |  |              |             |   |            |    |    |  |            |     |     |                              |  |                     |   |            |            |  |            |            |             |
| <i>MLT</i>                                                                                                                              | -118 SD171                                                                                                                                                                                                                                                                                                                                                                                                                                                                                                                                                                                                                                                                                                                                                                                                                                                                                                                                                                                                                                                                                                                                                                                                                                                                                                                                                                                                                                                                                                                                                                                                                                                                                                                                                             |                                                                                                                                                                                                                                                                                                                                                                                                                                                                                                       |                                                                                                                                                                                                                                                                                                                                                                                                                                                                                                                                                                                                                                                                                                                                                                                                                                                                                                                                                              |  |                |   |            |             |  |            |            |              |  |              |             |   |            |    |    |  |            |     |     |                              |  |                     |   |            |            |  |            |            |             |
| <i>IVB</i>                                                                                                                              | -146 SD122                                                                                                                                                                                                                                                                                                                                                                                                                                                                                                                                                                                                                                                                                                                                                                                                                                                                                                                                                                                                                                                                                                                                                                                                                                                                                                                                                                                                                                                                                                                                                                                                                                                                                                                                                             | 0.62 vs MLT                                                                                                                                                                                                                                                                                                                                                                                                                                                                                           |                                                                                                                                                                                                                                                                                                                                                                                                                                                                                                                                                                                                                                                                                                                                                                                                                                                                                                                                                              |  |                |   |            |             |  |            |            |              |  |              |             |   |            |    |    |  |            |     |     |                              |  |                     |   |            |            |  |            |            |             |

| Study                                                                                                          | Participants and baseline values                                                                                                                                                                                                                                                                                                                                                                                                                                                                                                                                                                                                                                                                                                                                                                                                                                                                                                                                                                                                                                                                                                                                                            | Intervention                                                                                                                                                                                                                                                                                                                                                                      | Outcome (change from baseline at study end)                                                                                                                                                                                                                                                                                                                                                                                                                                                                                                                                                                                                                                                                                                                                                                                                                                                                                                                                                                                                                                                                                                             |  |               |   |                |                               |                                 |                |                               |                     |  |                       |   |                |     |                                 |                |     |                     |
|----------------------------------------------------------------------------------------------------------------|---------------------------------------------------------------------------------------------------------------------------------------------------------------------------------------------------------------------------------------------------------------------------------------------------------------------------------------------------------------------------------------------------------------------------------------------------------------------------------------------------------------------------------------------------------------------------------------------------------------------------------------------------------------------------------------------------------------------------------------------------------------------------------------------------------------------------------------------------------------------------------------------------------------------------------------------------------------------------------------------------------------------------------------------------------------------------------------------------------------------------------------------------------------------------------------------|-----------------------------------------------------------------------------------------------------------------------------------------------------------------------------------------------------------------------------------------------------------------------------------------------------------------------------------------------------------------------------------|---------------------------------------------------------------------------------------------------------------------------------------------------------------------------------------------------------------------------------------------------------------------------------------------------------------------------------------------------------------------------------------------------------------------------------------------------------------------------------------------------------------------------------------------------------------------------------------------------------------------------------------------------------------------------------------------------------------------------------------------------------------------------------------------------------------------------------------------------------------------------------------------------------------------------------------------------------------------------------------------------------------------------------------------------------------------------------------------------------------------------------------------------------|--|---------------|---|----------------|-------------------------------|---------------------------------|----------------|-------------------------------|---------------------|--|-----------------------|---|----------------|-----|---------------------------------|----------------|-----|---------------------|
| <p><b>Lam 2009</b>[35]<br/><b>Hong Kong</b></p> <p><b>Design:</b> 2-arm RCT<br/><b>Follow-up:</b> 6 months</p> | <p><b>N:</b> 52 eyes of 52 patients<br/><b>Inclusion criteria:</b> <math>\geq 18</math> years, type 1 or 2 DM, clinically significant DMO (slit-lamp biomicroscopy, ETDRS criteria; leakage confirmed by fluorescein angiography, CMT <math>\geq 250</math> <math>\mu\text{m}</math> on OCT), BCVA <math>\geq 1.3</math> ETDRS logMAR units; only patients with diffuse DMO recruited<br/><b>Exclusion criteria:</b> macular oedema due to reasons other than diabetes, significant media opacities, macular ischemia of <math>\geq 1</math> disk area, vitreomacular traction, PDR, aphakia, glaucoma or ocular hypertension, previous anti-VEGF treatment, intraocular surgery except uncomplicated cataract extraction (but <math>&gt; 6</math> months prior), focal DMO, any laser procedure within previous 4 months, subtenon or intravitreal triamcinolone injection within 6 months, pregnancy.<br/><b>Age:</b> 65.3 SD8.9 years<br/><b>Sex:</b> 46.2% female<br/><b>Diabetes type:</b> not reported<br/><b>HbA1c:</b> 7.5 SD1.0%<br/><b>Baseline VA:</b> 0.61 SD0.29 logMAR<br/><b>Baseline CMT:</b> 466 SD127 <math>\mu\text{m}</math><br/><b>Comorbidities:</b> not reported</p> | <p><b>Group 1 (IVB1.25, n=26 eyes):</b> 1.25 mg bevacizumab (0.05 ml)<br/><b>Group 2 (IVB2.5, n=26 eyes):</b> 2.5 mg bevacizumab (0.1 ml)<br/><b>Regimen for all groups:</b> 3 monthly IV injections, topical 0.5% levofloxacin 4x/day for up to 2 weeks after each injection</p>                                                                                                 | <p><b>At 6 months</b><br/><b>BCVA (ETDRS chart):</b></p> <table border="1"> <thead> <tr> <th></th> <th>BCVA (logMAR)</th> <th>p</th> </tr> </thead> <tbody> <tr> <td><b>IVB1.25</b></td> <td>0.11 SD0.31<br/>[+5.5 letters]</td> <td>0.018 vs baseline, NS vs IVB2.5</td> </tr> <tr> <td><b>IVB2.5</b></td> <td>0.13 SD0.26<br/>[+6.5 letters]</td> <td>0.003 vs baseline</td> </tr> </tbody> </table> <p><b>CMT (OCT):</b></p> <table border="1"> <thead> <tr> <th></th> <th>CMT (<math>\mu\text{m}</math>)</th> <th>p</th> </tr> </thead> <tbody> <tr> <td><b>IVB1.25</b></td> <td>96</td> <td>0.002 vs baseline, NS vs IVB2.5</td> </tr> <tr> <td><b>IVB2.5</b></td> <td>74</td> <td>0.013 vs baseline</td> </tr> </tbody> </table> <p>Subgroups:</p> <ul style="list-style-type: none"> <li>For patients with previous DMO treatment (mainly laser): no significant reduction in CMT at 6 months (452 <math>\mu\text{m}</math> at baseline to 416 <math>\mu\text{m}</math> at 6 months, <math>p=0.22</math>); no significant improvement in BCVA (0.66 logMAR at baseline to 0.56 logMAR at 6 months [+5 letters], <math>p=0.074</math>)</li> </ul> |  | BCVA (logMAR) | p | <b>IVB1.25</b> | 0.11 SD0.31<br>[+5.5 letters] | 0.018 vs baseline, NS vs IVB2.5 | <b>IVB2.5</b>  | 0.13 SD0.26<br>[+6.5 letters] | 0.003 vs baseline   |  | CMT ( $\mu\text{m}$ ) | p | <b>IVB1.25</b> | 96  | 0.002 vs baseline, NS vs IVB2.5 | <b>IVB2.5</b>  | 74  | 0.013 vs baseline   |
|                                                                                                                | BCVA (logMAR)                                                                                                                                                                                                                                                                                                                                                                                                                                                                                                                                                                                                                                                                                                                                                                                                                                                                                                                                                                                                                                                                                                                                                                               | p                                                                                                                                                                                                                                                                                                                                                                                 |                                                                                                                                                                                                                                                                                                                                                                                                                                                                                                                                                                                                                                                                                                                                                                                                                                                                                                                                                                                                                                                                                                                                                         |  |               |   |                |                               |                                 |                |                               |                     |  |                       |   |                |     |                                 |                |     |                     |
| <b>IVB1.25</b>                                                                                                 | 0.11 SD0.31<br>[+5.5 letters]                                                                                                                                                                                                                                                                                                                                                                                                                                                                                                                                                                                                                                                                                                                                                                                                                                                                                                                                                                                                                                                                                                                                                               | 0.018 vs baseline, NS vs IVB2.5                                                                                                                                                                                                                                                                                                                                                   |                                                                                                                                                                                                                                                                                                                                                                                                                                                                                                                                                                                                                                                                                                                                                                                                                                                                                                                                                                                                                                                                                                                                                         |  |               |   |                |                               |                                 |                |                               |                     |  |                       |   |                |     |                                 |                |     |                     |
| <b>IVB2.5</b>                                                                                                  | 0.13 SD0.26<br>[+6.5 letters]                                                                                                                                                                                                                                                                                                                                                                                                                                                                                                                                                                                                                                                                                                                                                                                                                                                                                                                                                                                                                                                                                                                                                               | 0.003 vs baseline                                                                                                                                                                                                                                                                                                                                                                 |                                                                                                                                                                                                                                                                                                                                                                                                                                                                                                                                                                                                                                                                                                                                                                                                                                                                                                                                                                                                                                                                                                                                                         |  |               |   |                |                               |                                 |                |                               |                     |  |                       |   |                |     |                                 |                |     |                     |
|                                                                                                                | CMT ( $\mu\text{m}$ )                                                                                                                                                                                                                                                                                                                                                                                                                                                                                                                                                                                                                                                                                                                                                                                                                                                                                                                                                                                                                                                                                                                                                                       | p                                                                                                                                                                                                                                                                                                                                                                                 |                                                                                                                                                                                                                                                                                                                                                                                                                                                                                                                                                                                                                                                                                                                                                                                                                                                                                                                                                                                                                                                                                                                                                         |  |               |   |                |                               |                                 |                |                               |                     |  |                       |   |                |     |                                 |                |     |                     |
| <b>IVB1.25</b>                                                                                                 | 96                                                                                                                                                                                                                                                                                                                                                                                                                                                                                                                                                                                                                                                                                                                                                                                                                                                                                                                                                                                                                                                                                                                                                                                          | 0.002 vs baseline, NS vs IVB2.5                                                                                                                                                                                                                                                                                                                                                   |                                                                                                                                                                                                                                                                                                                                                                                                                                                                                                                                                                                                                                                                                                                                                                                                                                                                                                                                                                                                                                                                                                                                                         |  |               |   |                |                               |                                 |                |                               |                     |  |                       |   |                |     |                                 |                |     |                     |
| <b>IVB2.5</b>                                                                                                  | 74                                                                                                                                                                                                                                                                                                                                                                                                                                                                                                                                                                                                                                                                                                                                                                                                                                                                                                                                                                                                                                                                                                                                                                                          | 0.013 vs baseline                                                                                                                                                                                                                                                                                                                                                                 |                                                                                                                                                                                                                                                                                                                                                                                                                                                                                                                                                                                                                                                                                                                                                                                                                                                                                                                                                                                                                                                                                                                                                         |  |               |   |                |                               |                                 |                |                               |                     |  |                       |   |                |     |                                 |                |     |                     |
| <p><b>Faghihi 2010</b>[53]<br/><b>Iran</b></p> <p><b>Design:</b> 2-arm RCT<br/><b>Follow-up:</b> 6 months</p>  | <p><b>N:</b> 80 eyes of 40 patients<br/><b>Inclusion criteria:</b> Bilateral non-tractional CSME, 10/10 <math>&gt; V.A \geq 1/10</math>, Controlled blood pressure.<br/><b>Exclusion criteria:</b> Advanced or advanced active PDR, Significant cataract, Glaucoma, History of recent vascular accident (e.g. MI, CVA), Previous treatment of CSME or PDR, or pharmacotherapy for CSME, macular ischemia and uncontrolled hypertension.<br/><b>Age:</b> 57.7<math>\pm</math>8 years.<br/><b>Sex:</b> 27.5% females<br/><b>Diabetes type:</b> NR<br/><b>HbA1c:</b> 8.42<math>\pm</math>1.82 g/dl<br/><b>Baseline VA:</b> 0.326 to 0.409 (SD 0.279 to 0.332)<br/><b>Baseline CMT:</b> 277 <math>\mu\text{m}</math> to 287 <math>\mu\text{m}</math> (SD 78 to 98)<br/><b>Comorbidities:</b> not reported</p>                                                                                                                                                                                                                                                                                                                                                                                   | <p><b>Group 1 (IVB, n= 40 eyes):</b> 1.25mg bevacizumab<br/><b>Group 2 (IVB+MPC, n= 40 eyes):</b> 1.25mg bevacizumab<br/><b>Regimen for all groups:</b> Eyes examined every two months and if evidence of CSME IVB was injected. mean of the number of IVB injections in IVB group and IVB+MPC group were 2.23<math>\pm</math>1.24 and 2.49<math>\pm</math>1.09 respectively.</p> | <p><b>At 6 months</b><br/><b>Mean change in BCVA (ETDRS chart):</b></p> <table border="1"> <thead> <tr> <th></th> <th>BCVA (logMAR)</th> <th>p</th> </tr> </thead> <tbody> <tr> <td><b>IVB</b></td> <td>0.138</td> <td><math>&lt;0.05</math> vs baseline</td> </tr> <tr> <td><b>IVB+MPC</b></td> <td>0.179</td> <td><math>&lt;0.05</math> vs baseline</td> </tr> </tbody> </table> <ul style="list-style-type: none"> <li>no statistically significant difference between the two groups</li> </ul> <p><b>CMT (OCT):</b></p> <table border="1"> <thead> <tr> <th></th> <th>CMT (<math>\mu\text{m}</math>)</th> <th>p</th> </tr> </thead> <tbody> <tr> <td><b>IVB</b></td> <td>-39</td> <td><math>&lt;0.05</math> vs baseline</td> </tr> <tr> <td><b>IVB+MPC</b></td> <td>-39</td> <td><math>&lt;0.05</math> vs baseline</td> </tr> </tbody> </table> <ul style="list-style-type: none"> <li>no statistically significant difference between the two groups</li> </ul>                                                                                                                                                                                   |  | BCVA (logMAR) | p | <b>IVB</b>     | 0.138                         | $<0.05$ vs baseline             | <b>IVB+MPC</b> | 0.179                         | $<0.05$ vs baseline |  | CMT ( $\mu\text{m}$ ) | p | <b>IVB</b>     | -39 | $<0.05$ vs baseline             | <b>IVB+MPC</b> | -39 | $<0.05$ vs baseline |
|                                                                                                                | BCVA (logMAR)                                                                                                                                                                                                                                                                                                                                                                                                                                                                                                                                                                                                                                                                                                                                                                                                                                                                                                                                                                                                                                                                                                                                                                               | p                                                                                                                                                                                                                                                                                                                                                                                 |                                                                                                                                                                                                                                                                                                                                                                                                                                                                                                                                                                                                                                                                                                                                                                                                                                                                                                                                                                                                                                                                                                                                                         |  |               |   |                |                               |                                 |                |                               |                     |  |                       |   |                |     |                                 |                |     |                     |
| <b>IVB</b>                                                                                                     | 0.138                                                                                                                                                                                                                                                                                                                                                                                                                                                                                                                                                                                                                                                                                                                                                                                                                                                                                                                                                                                                                                                                                                                                                                                       | $<0.05$ vs baseline                                                                                                                                                                                                                                                                                                                                                               |                                                                                                                                                                                                                                                                                                                                                                                                                                                                                                                                                                                                                                                                                                                                                                                                                                                                                                                                                                                                                                                                                                                                                         |  |               |   |                |                               |                                 |                |                               |                     |  |                       |   |                |     |                                 |                |     |                     |
| <b>IVB+MPC</b>                                                                                                 | 0.179                                                                                                                                                                                                                                                                                                                                                                                                                                                                                                                                                                                                                                                                                                                                                                                                                                                                                                                                                                                                                                                                                                                                                                                       | $<0.05$ vs baseline                                                                                                                                                                                                                                                                                                                                                               |                                                                                                                                                                                                                                                                                                                                                                                                                                                                                                                                                                                                                                                                                                                                                                                                                                                                                                                                                                                                                                                                                                                                                         |  |               |   |                |                               |                                 |                |                               |                     |  |                       |   |                |     |                                 |                |     |                     |
|                                                                                                                | CMT ( $\mu\text{m}$ )                                                                                                                                                                                                                                                                                                                                                                                                                                                                                                                                                                                                                                                                                                                                                                                                                                                                                                                                                                                                                                                                                                                                                                       | p                                                                                                                                                                                                                                                                                                                                                                                 |                                                                                                                                                                                                                                                                                                                                                                                                                                                                                                                                                                                                                                                                                                                                                                                                                                                                                                                                                                                                                                                                                                                                                         |  |               |   |                |                               |                                 |                |                               |                     |  |                       |   |                |     |                                 |                |     |                     |
| <b>IVB</b>                                                                                                     | -39                                                                                                                                                                                                                                                                                                                                                                                                                                                                                                                                                                                                                                                                                                                                                                                                                                                                                                                                                                                                                                                                                                                                                                                         | $<0.05$ vs baseline                                                                                                                                                                                                                                                                                                                                                               |                                                                                                                                                                                                                                                                                                                                                                                                                                                                                                                                                                                                                                                                                                                                                                                                                                                                                                                                                                                                                                                                                                                                                         |  |               |   |                |                               |                                 |                |                               |                     |  |                       |   |                |     |                                 |                |     |                     |
| <b>IVB+MPC</b>                                                                                                 | -39                                                                                                                                                                                                                                                                                                                                                                                                                                                                                                                                                                                                                                                                                                                                                                                                                                                                                                                                                                                                                                                                                                                                                                                         | $<0.05$ vs baseline                                                                                                                                                                                                                                                                                                                                                               |                                                                                                                                                                                                                                                                                                                                                                                                                                                                                                                                                                                                                                                                                                                                                                                                                                                                                                                                                                                                                                                                                                                                                         |  |               |   |                |                               |                                 |                |                               |                     |  |                       |   |                |     |                                 |                |     |                     |

Abbreviations: See table 2

Table 5: Pegaptanib and aflibercept studies

| Study                                                                                                                      | Participants and baseline values                                                                                                                                                                                                                                                                                                                                                                                                                                                                                                                                                                                                                                                                                                                                                                                                                                                                                                                                                                                                                                                                                                                                                                                                                                                                                                                                                                                                                                                                                                                                                                                                                                        | Intervention                                                                                                                                                                                                                                                                                                                                                                                                                                                                                                                                                                                                                                                                                                                                                                                                                                          | Outcome (change from baseline at study end)                                                                                                                                                                                                                                                                                                                                                                                                                                                                                                                                                                                                                                                                                                                                                                                                                                                                                                                                                                                                                                                                                                                                                                                                                                                                                                                                         |  |                |   |               |      |            |             |      |           |             |      |         |          |      |  |               |     |            |             |     |  |             |     |  |          |     |  |  |                               |   |               |                         |           |             |                        |         |             |                       |         |          |      |  |
|----------------------------------------------------------------------------------------------------------------------------|-------------------------------------------------------------------------------------------------------------------------------------------------------------------------------------------------------------------------------------------------------------------------------------------------------------------------------------------------------------------------------------------------------------------------------------------------------------------------------------------------------------------------------------------------------------------------------------------------------------------------------------------------------------------------------------------------------------------------------------------------------------------------------------------------------------------------------------------------------------------------------------------------------------------------------------------------------------------------------------------------------------------------------------------------------------------------------------------------------------------------------------------------------------------------------------------------------------------------------------------------------------------------------------------------------------------------------------------------------------------------------------------------------------------------------------------------------------------------------------------------------------------------------------------------------------------------------------------------------------------------------------------------------------------------|-------------------------------------------------------------------------------------------------------------------------------------------------------------------------------------------------------------------------------------------------------------------------------------------------------------------------------------------------------------------------------------------------------------------------------------------------------------------------------------------------------------------------------------------------------------------------------------------------------------------------------------------------------------------------------------------------------------------------------------------------------------------------------------------------------------------------------------------------------|-------------------------------------------------------------------------------------------------------------------------------------------------------------------------------------------------------------------------------------------------------------------------------------------------------------------------------------------------------------------------------------------------------------------------------------------------------------------------------------------------------------------------------------------------------------------------------------------------------------------------------------------------------------------------------------------------------------------------------------------------------------------------------------------------------------------------------------------------------------------------------------------------------------------------------------------------------------------------------------------------------------------------------------------------------------------------------------------------------------------------------------------------------------------------------------------------------------------------------------------------------------------------------------------------------------------------------------------------------------------------------------|--|----------------|---|---------------|------|------------|-------------|------|-----------|-------------|------|---------|----------|------|--|---------------|-----|------------|-------------|-----|--|-------------|-----|--|----------|-----|--|--|-------------------------------|---|---------------|-------------------------|-----------|-------------|------------------------|---------|-------------|-----------------------|---------|----------|------|--|
| <i>Pegaptanib</i>                                                                                                          |                                                                                                                                                                                                                                                                                                                                                                                                                                                                                                                                                                                                                                                                                                                                                                                                                                                                                                                                                                                                                                                                                                                                                                                                                                                                                                                                                                                                                                                                                                                                                                                                                                                                         |                                                                                                                                                                                                                                                                                                                                                                                                                                                                                                                                                                                                                                                                                                                                                                                                                                                       |                                                                                                                                                                                                                                                                                                                                                                                                                                                                                                                                                                                                                                                                                                                                                                                                                                                                                                                                                                                                                                                                                                                                                                                                                                                                                                                                                                                     |  |                |   |               |      |            |             |      |           |             |      |         |          |      |  |               |     |            |             |     |  |             |     |  |          |     |  |  |                               |   |               |                         |           |             |                        |         |             |                       |         |          |      |  |
| <b>Cunningham 2005 / Adamis 2006</b> [39,57]<br>USA<br><br><b>Design:</b> 4-arm phase II RCT<br><b>Follow-up:</b> 36 weeks | <b>N:</b> 172 eyes of 172 patients<br><b>Inclusion criteria:</b> $\geq 18$ years, type 1 or 2 DM, DMO involving the center of the macula with corresponding leakage from microaneurysms, retinal telangiectasis, or both; clear ocular media, BCVA letter scores between 68 and 25 in the study eye and at least 35 in the fellow eye; IOP $\leq 23$ mmHg, focal photocoagulation could be safely deferred for 16 weeks; no ECG abnormalities, no major serological abnormalities<br><b>Exclusion criteria:</b> history of panretinal or focal photocoagulation; neodymium:yttrium–aluminum–garnet laser or peripheral retinal cryoablation in previous 6 months; any ocular abnormality interfering with VA assessment or fundus photography; vitreoretinal traction; vitreous incarceration; retinal vein occlusion involving the macula; atrophy/scarring/fibrosis or hard exudates involving the center of the macula; history of intraocular surgery within previous 12 months, myopia of $\geq 8$ diopters, axial length of $\geq 25$ mm, likelihood of requiring panretinal photocoagulation within following 9 months; cataract surgery within 12 months; active ocular or periocular infection; previous therapeutic radiation to the eye, head, or neck;; known serious allergies to fluorescein dye; HbA1c $\geq 13\%$ , pregnancy<br><b>Age:</b> 61.3 to 64.0 SD9.3 to 10.1 years<br><b>Sex:</b> 45 to 55% female<br><b>Diabetes type:</b> 5 to 10% IDDM<br><b>HbA1c:</b> 7.1 to 7.7 SD1.2 to 1.6<br><b>Baseline VA:</b> letter score 55.0 to 57.1 SD9.1 to 11.5<br><b>Baseline CMT:</b> 423.2 to 476.0 $\mu\text{m}$<br><b>Comorbidities:</b> not reported | <b>Group 1 (IVP0.3, n=44 eyes):</b> 0.3 mg IV pegaptanib (90 $\mu\text{l}$ ) (median 5 injections (range 1 to 6))<br><b>Group 2 (IVP1, n=44 eyes):</b> 1 mg IV pegaptanib (90 $\mu\text{l}$ ) (median 6 injections (range 3 to 6))<br><b>Group 3 (IVP3, n=42 eyes):</b> 3 mg IV pegaptanib (90 $\mu\text{l}$ ) (median 6 injections (range 1 to 6))<br><b>Group 4 (C, n=42 eyes):</b> sham injection (median 5 injections (range 1 to 6))<br><b>Regimen for all groups:</b> injections at baseline, week 6 and week 12; thereafter, additional injections administered every 6 weeks at the discretion of the investigators if judged indicated (maximum of 6 injections up to week 30); laser photocoagulation allowed after week 13 if judged indicated by the study-masked ophthalmologist (25% for IVP0.3, 30% for IVP1, 40% for IVP3, 48% for C) | <b>At 36 weeks BCVA:</b> <table border="1"><thead><tr><th></th><th>BCVA (letters)</th><th>p</th></tr></thead><tbody><tr><td><i>IVP0.3</i></td><td>+4.7</td><td>0.04 vs C</td></tr><tr><td><i>IVP1</i></td><td>+4.7</td><td>0.05 vs C</td></tr><tr><td><i>IVP3</i></td><td>+1.1</td><td>NS vs C</td></tr><tr><td><i>C</i></td><td>-0.4</td><td></td></tr></tbody></table><br><b>plus <math>\geq 10</math> letters</b> <table border="1"><tbody><tr><td><i>IVP0.3</i></td><td>34%</td><td>0.003 vs C</td></tr><tr><td><i>IVP1</i></td><td>30%</td><td></td></tr><tr><td><i>IVP3</i></td><td>14%</td><td></td></tr><tr><td><i>C</i></td><td>10%</td><td></td></tr></tbody></table><br><b>CMT (OCT):</b> <table border="1"><thead><tr><th></th><th>CMT (<math>\mu\text{m}</math>, 95% CI)</th><th>p</th></tr></thead><tbody><tr><td><i>IVP0.3</i></td><td>-68.0 (-118.9 to -9.88)</td><td>0.02 vs C</td></tr><tr><td><i>IVP1</i></td><td>-22.7 (-76.9 to +33.8)</td><td>NS vs C</td></tr><tr><td><i>IVP3</i></td><td>-5.3 (-63.0 to +49.5)</td><td>NS vs C</td></tr><tr><td><i>C</i></td><td>+3.7</td><td></td></tr></tbody></table><br>Subgroups: <ul style="list-style-type: none"><li>of 16 participants with retinal neovascularization at baseline, 8 of 13 (62%) in the pegaptanib groups and 0 of 3 in the sham group had regression of neovascularization at 36 weeks</li></ul> |  | BCVA (letters) | p | <i>IVP0.3</i> | +4.7 | 0.04 vs C  | <i>IVP1</i> | +4.7 | 0.05 vs C | <i>IVP3</i> | +1.1 | NS vs C | <i>C</i> | -0.4 |  | <i>IVP0.3</i> | 34% | 0.003 vs C | <i>IVP1</i> | 30% |  | <i>IVP3</i> | 14% |  | <i>C</i> | 10% |  |  | CMT ( $\mu\text{m}$ , 95% CI) | p | <i>IVP0.3</i> | -68.0 (-118.9 to -9.88) | 0.02 vs C | <i>IVP1</i> | -22.7 (-76.9 to +33.8) | NS vs C | <i>IVP3</i> | -5.3 (-63.0 to +49.5) | NS vs C | <i>C</i> | +3.7 |  |
|                                                                                                                            | BCVA (letters)                                                                                                                                                                                                                                                                                                                                                                                                                                                                                                                                                                                                                                                                                                                                                                                                                                                                                                                                                                                                                                                                                                                                                                                                                                                                                                                                                                                                                                                                                                                                                                                                                                                          | p                                                                                                                                                                                                                                                                                                                                                                                                                                                                                                                                                                                                                                                                                                                                                                                                                                                     |                                                                                                                                                                                                                                                                                                                                                                                                                                                                                                                                                                                                                                                                                                                                                                                                                                                                                                                                                                                                                                                                                                                                                                                                                                                                                                                                                                                     |  |                |   |               |      |            |             |      |           |             |      |         |          |      |  |               |     |            |             |     |  |             |     |  |          |     |  |  |                               |   |               |                         |           |             |                        |         |             |                       |         |          |      |  |
| <i>IVP0.3</i>                                                                                                              | +4.7                                                                                                                                                                                                                                                                                                                                                                                                                                                                                                                                                                                                                                                                                                                                                                                                                                                                                                                                                                                                                                                                                                                                                                                                                                                                                                                                                                                                                                                                                                                                                                                                                                                                    | 0.04 vs C                                                                                                                                                                                                                                                                                                                                                                                                                                                                                                                                                                                                                                                                                                                                                                                                                                             |                                                                                                                                                                                                                                                                                                                                                                                                                                                                                                                                                                                                                                                                                                                                                                                                                                                                                                                                                                                                                                                                                                                                                                                                                                                                                                                                                                                     |  |                |   |               |      |            |             |      |           |             |      |         |          |      |  |               |     |            |             |     |  |             |     |  |          |     |  |  |                               |   |               |                         |           |             |                        |         |             |                       |         |          |      |  |
| <i>IVP1</i>                                                                                                                | +4.7                                                                                                                                                                                                                                                                                                                                                                                                                                                                                                                                                                                                                                                                                                                                                                                                                                                                                                                                                                                                                                                                                                                                                                                                                                                                                                                                                                                                                                                                                                                                                                                                                                                                    | 0.05 vs C                                                                                                                                                                                                                                                                                                                                                                                                                                                                                                                                                                                                                                                                                                                                                                                                                                             |                                                                                                                                                                                                                                                                                                                                                                                                                                                                                                                                                                                                                                                                                                                                                                                                                                                                                                                                                                                                                                                                                                                                                                                                                                                                                                                                                                                     |  |                |   |               |      |            |             |      |           |             |      |         |          |      |  |               |     |            |             |     |  |             |     |  |          |     |  |  |                               |   |               |                         |           |             |                        |         |             |                       |         |          |      |  |
| <i>IVP3</i>                                                                                                                | +1.1                                                                                                                                                                                                                                                                                                                                                                                                                                                                                                                                                                                                                                                                                                                                                                                                                                                                                                                                                                                                                                                                                                                                                                                                                                                                                                                                                                                                                                                                                                                                                                                                                                                                    | NS vs C                                                                                                                                                                                                                                                                                                                                                                                                                                                                                                                                                                                                                                                                                                                                                                                                                                               |                                                                                                                                                                                                                                                                                                                                                                                                                                                                                                                                                                                                                                                                                                                                                                                                                                                                                                                                                                                                                                                                                                                                                                                                                                                                                                                                                                                     |  |                |   |               |      |            |             |      |           |             |      |         |          |      |  |               |     |            |             |     |  |             |     |  |          |     |  |  |                               |   |               |                         |           |             |                        |         |             |                       |         |          |      |  |
| <i>C</i>                                                                                                                   | -0.4                                                                                                                                                                                                                                                                                                                                                                                                                                                                                                                                                                                                                                                                                                                                                                                                                                                                                                                                                                                                                                                                                                                                                                                                                                                                                                                                                                                                                                                                                                                                                                                                                                                                    |                                                                                                                                                                                                                                                                                                                                                                                                                                                                                                                                                                                                                                                                                                                                                                                                                                                       |                                                                                                                                                                                                                                                                                                                                                                                                                                                                                                                                                                                                                                                                                                                                                                                                                                                                                                                                                                                                                                                                                                                                                                                                                                                                                                                                                                                     |  |                |   |               |      |            |             |      |           |             |      |         |          |      |  |               |     |            |             |     |  |             |     |  |          |     |  |  |                               |   |               |                         |           |             |                        |         |             |                       |         |          |      |  |
| <i>IVP0.3</i>                                                                                                              | 34%                                                                                                                                                                                                                                                                                                                                                                                                                                                                                                                                                                                                                                                                                                                                                                                                                                                                                                                                                                                                                                                                                                                                                                                                                                                                                                                                                                                                                                                                                                                                                                                                                                                                     | 0.003 vs C                                                                                                                                                                                                                                                                                                                                                                                                                                                                                                                                                                                                                                                                                                                                                                                                                                            |                                                                                                                                                                                                                                                                                                                                                                                                                                                                                                                                                                                                                                                                                                                                                                                                                                                                                                                                                                                                                                                                                                                                                                                                                                                                                                                                                                                     |  |                |   |               |      |            |             |      |           |             |      |         |          |      |  |               |     |            |             |     |  |             |     |  |          |     |  |  |                               |   |               |                         |           |             |                        |         |             |                       |         |          |      |  |
| <i>IVP1</i>                                                                                                                | 30%                                                                                                                                                                                                                                                                                                                                                                                                                                                                                                                                                                                                                                                                                                                                                                                                                                                                                                                                                                                                                                                                                                                                                                                                                                                                                                                                                                                                                                                                                                                                                                                                                                                                     |                                                                                                                                                                                                                                                                                                                                                                                                                                                                                                                                                                                                                                                                                                                                                                                                                                                       |                                                                                                                                                                                                                                                                                                                                                                                                                                                                                                                                                                                                                                                                                                                                                                                                                                                                                                                                                                                                                                                                                                                                                                                                                                                                                                                                                                                     |  |                |   |               |      |            |             |      |           |             |      |         |          |      |  |               |     |            |             |     |  |             |     |  |          |     |  |  |                               |   |               |                         |           |             |                        |         |             |                       |         |          |      |  |
| <i>IVP3</i>                                                                                                                | 14%                                                                                                                                                                                                                                                                                                                                                                                                                                                                                                                                                                                                                                                                                                                                                                                                                                                                                                                                                                                                                                                                                                                                                                                                                                                                                                                                                                                                                                                                                                                                                                                                                                                                     |                                                                                                                                                                                                                                                                                                                                                                                                                                                                                                                                                                                                                                                                                                                                                                                                                                                       |                                                                                                                                                                                                                                                                                                                                                                                                                                                                                                                                                                                                                                                                                                                                                                                                                                                                                                                                                                                                                                                                                                                                                                                                                                                                                                                                                                                     |  |                |   |               |      |            |             |      |           |             |      |         |          |      |  |               |     |            |             |     |  |             |     |  |          |     |  |  |                               |   |               |                         |           |             |                        |         |             |                       |         |          |      |  |
| <i>C</i>                                                                                                                   | 10%                                                                                                                                                                                                                                                                                                                                                                                                                                                                                                                                                                                                                                                                                                                                                                                                                                                                                                                                                                                                                                                                                                                                                                                                                                                                                                                                                                                                                                                                                                                                                                                                                                                                     |                                                                                                                                                                                                                                                                                                                                                                                                                                                                                                                                                                                                                                                                                                                                                                                                                                                       |                                                                                                                                                                                                                                                                                                                                                                                                                                                                                                                                                                                                                                                                                                                                                                                                                                                                                                                                                                                                                                                                                                                                                                                                                                                                                                                                                                                     |  |                |   |               |      |            |             |      |           |             |      |         |          |      |  |               |     |            |             |     |  |             |     |  |          |     |  |  |                               |   |               |                         |           |             |                        |         |             |                       |         |          |      |  |
|                                                                                                                            | CMT ( $\mu\text{m}$ , 95% CI)                                                                                                                                                                                                                                                                                                                                                                                                                                                                                                                                                                                                                                                                                                                                                                                                                                                                                                                                                                                                                                                                                                                                                                                                                                                                                                                                                                                                                                                                                                                                                                                                                                           | p                                                                                                                                                                                                                                                                                                                                                                                                                                                                                                                                                                                                                                                                                                                                                                                                                                                     |                                                                                                                                                                                                                                                                                                                                                                                                                                                                                                                                                                                                                                                                                                                                                                                                                                                                                                                                                                                                                                                                                                                                                                                                                                                                                                                                                                                     |  |                |   |               |      |            |             |      |           |             |      |         |          |      |  |               |     |            |             |     |  |             |     |  |          |     |  |  |                               |   |               |                         |           |             |                        |         |             |                       |         |          |      |  |
| <i>IVP0.3</i>                                                                                                              | -68.0 (-118.9 to -9.88)                                                                                                                                                                                                                                                                                                                                                                                                                                                                                                                                                                                                                                                                                                                                                                                                                                                                                                                                                                                                                                                                                                                                                                                                                                                                                                                                                                                                                                                                                                                                                                                                                                                 | 0.02 vs C                                                                                                                                                                                                                                                                                                                                                                                                                                                                                                                                                                                                                                                                                                                                                                                                                                             |                                                                                                                                                                                                                                                                                                                                                                                                                                                                                                                                                                                                                                                                                                                                                                                                                                                                                                                                                                                                                                                                                                                                                                                                                                                                                                                                                                                     |  |                |   |               |      |            |             |      |           |             |      |         |          |      |  |               |     |            |             |     |  |             |     |  |          |     |  |  |                               |   |               |                         |           |             |                        |         |             |                       |         |          |      |  |
| <i>IVP1</i>                                                                                                                | -22.7 (-76.9 to +33.8)                                                                                                                                                                                                                                                                                                                                                                                                                                                                                                                                                                                                                                                                                                                                                                                                                                                                                                                                                                                                                                                                                                                                                                                                                                                                                                                                                                                                                                                                                                                                                                                                                                                  | NS vs C                                                                                                                                                                                                                                                                                                                                                                                                                                                                                                                                                                                                                                                                                                                                                                                                                                               |                                                                                                                                                                                                                                                                                                                                                                                                                                                                                                                                                                                                                                                                                                                                                                                                                                                                                                                                                                                                                                                                                                                                                                                                                                                                                                                                                                                     |  |                |   |               |      |            |             |      |           |             |      |         |          |      |  |               |     |            |             |     |  |             |     |  |          |     |  |  |                               |   |               |                         |           |             |                        |         |             |                       |         |          |      |  |
| <i>IVP3</i>                                                                                                                | -5.3 (-63.0 to +49.5)                                                                                                                                                                                                                                                                                                                                                                                                                                                                                                                                                                                                                                                                                                                                                                                                                                                                                                                                                                                                                                                                                                                                                                                                                                                                                                                                                                                                                                                                                                                                                                                                                                                   | NS vs C                                                                                                                                                                                                                                                                                                                                                                                                                                                                                                                                                                                                                                                                                                                                                                                                                                               |                                                                                                                                                                                                                                                                                                                                                                                                                                                                                                                                                                                                                                                                                                                                                                                                                                                                                                                                                                                                                                                                                                                                                                                                                                                                                                                                                                                     |  |                |   |               |      |            |             |      |           |             |      |         |          |      |  |               |     |            |             |     |  |             |     |  |          |     |  |  |                               |   |               |                         |           |             |                        |         |             |                       |         |          |      |  |
| <i>C</i>                                                                                                                   | +3.7                                                                                                                                                                                                                                                                                                                                                                                                                                                                                                                                                                                                                                                                                                                                                                                                                                                                                                                                                                                                                                                                                                                                                                                                                                                                                                                                                                                                                                                                                                                                                                                                                                                                    |                                                                                                                                                                                                                                                                                                                                                                                                                                                                                                                                                                                                                                                                                                                                                                                                                                                       |                                                                                                                                                                                                                                                                                                                                                                                                                                                                                                                                                                                                                                                                                                                                                                                                                                                                                                                                                                                                                                                                                                                                                                                                                                                                                                                                                                                     |  |                |   |               |      |            |             |      |           |             |      |         |          |      |  |               |     |            |             |     |  |             |     |  |          |     |  |  |                               |   |               |                         |           |             |                        |         |             |                       |         |          |      |  |
| <b>Sultan 2011</b> [40]<br>Multicenter international<br><br><b>Design:</b> 2-arm placebo-controlled RCT                    | <b>N:</b> 260 eyes of 260 patients<br><b>Inclusion criteria:</b> $\geq 18$ years, type 1 or 2 DM, DMO involving the center of the macula not associated with ischemia, CMT $\geq 250$ $\mu\text{m}$ , BCVA letter score 65 to 35, IOP $\leq 21$ mmHg, clear ocular media<br><b>Exclusion criteria:</b> any abnormality other than DMO affecting VA assessment, vitreomacular traction; yttrium-aluminium-garnet laser, peripheral retinal cryoablation, laser retinopexy for retinal tears, focal or                                                                                                                                                                                                                                                                                                                                                                                                                                                                                                                                                                                                                                                                                                                                                                                                                                                                                                                                                                                                                                                                                                                                                                    | <b>Group 1 (IVP, n=133 eyes):</b> 0.3 mg IV pegaptanib sodium (mean number of injections 12.7 SD4.6)<br><b>Group 2 (C, n=127 eyes):</b> sham injection (mean number of injections 12.9 SD4.4)                                                                                                                                                                                                                                                                                                                                                                                                                                                                                                                                                                                                                                                         | <b>At 1 year BCVA (ETDRS):</b> <table border="1"><thead><tr><th></th><th>BCVA (letters)</th><th>p</th></tr></thead><tbody><tr><td><i>IVP</i></td><td>+5.2</td><td>&lt;0.05 vs C</td></tr><tr><td><i>C</i></td><td>+1.2</td><td></td></tr></tbody></table><br><b>plus <math>\geq 10</math></b>                                                                                                                                                                                                                                                                                                                                                                                                                                                                                                                                                                                                                                                                                                                                                                                                                                                                                                                                                                                                                                                                                       |  | BCVA (letters) | p | <i>IVP</i>    | +5.2 | <0.05 vs C | <i>C</i>    | +1.2 |           |             |      |         |          |      |  |               |     |            |             |     |  |             |     |  |          |     |  |  |                               |   |               |                         |           |             |                        |         |             |                       |         |          |      |  |
|                                                                                                                            | BCVA (letters)                                                                                                                                                                                                                                                                                                                                                                                                                                                                                                                                                                                                                                                                                                                                                                                                                                                                                                                                                                                                                                                                                                                                                                                                                                                                                                                                                                                                                                                                                                                                                                                                                                                          | p                                                                                                                                                                                                                                                                                                                                                                                                                                                                                                                                                                                                                                                                                                                                                                                                                                                     |                                                                                                                                                                                                                                                                                                                                                                                                                                                                                                                                                                                                                                                                                                                                                                                                                                                                                                                                                                                                                                                                                                                                                                                                                                                                                                                                                                                     |  |                |   |               |      |            |             |      |           |             |      |         |          |      |  |               |     |            |             |     |  |             |     |  |          |     |  |  |                               |   |               |                         |           |             |                        |         |             |                       |         |          |      |  |
| <i>IVP</i>                                                                                                                 | +5.2                                                                                                                                                                                                                                                                                                                                                                                                                                                                                                                                                                                                                                                                                                                                                                                                                                                                                                                                                                                                                                                                                                                                                                                                                                                                                                                                                                                                                                                                                                                                                                                                                                                                    | <0.05 vs C                                                                                                                                                                                                                                                                                                                                                                                                                                                                                                                                                                                                                                                                                                                                                                                                                                            |                                                                                                                                                                                                                                                                                                                                                                                                                                                                                                                                                                                                                                                                                                                                                                                                                                                                                                                                                                                                                                                                                                                                                                                                                                                                                                                                                                                     |  |                |   |               |      |            |             |      |           |             |      |         |          |      |  |               |     |            |             |     |  |             |     |  |          |     |  |  |                               |   |               |                         |           |             |                        |         |             |                       |         |          |      |  |
| <i>C</i>                                                                                                                   | +1.2                                                                                                                                                                                                                                                                                                                                                                                                                                                                                                                                                                                                                                                                                                                                                                                                                                                                                                                                                                                                                                                                                                                                                                                                                                                                                                                                                                                                                                                                                                                                                                                                                                                                    |                                                                                                                                                                                                                                                                                                                                                                                                                                                                                                                                                                                                                                                                                                                                                                                                                                                       |                                                                                                                                                                                                                                                                                                                                                                                                                                                                                                                                                                                                                                                                                                                                                                                                                                                                                                                                                                                                                                                                                                                                                                                                                                                                                                                                                                                     |  |                |   |               |      |            |             |      |           |             |      |         |          |      |  |               |     |            |             |     |  |             |     |  |          |     |  |  |                               |   |               |                         |           |             |                        |         |             |                       |         |          |      |  |

1  
2  
3  
4  
5  
6  
7  
8  
9  
10  
11  
12  
13  
14  
15  
16  
17  
18  
19  
20  
21  
22  
23  
24  
25  
26  
27  
28  
29  
30  
31  
32  
33  
34  
35  
36  
37  
38  
39  
40  
41  
42  
43  
44  
45  
46  
47  
48  
49

| Study                                                                  | Participants and baseline values                                                                                                                                                                                                                                                                                                                                                                                                                                                                                                                                                                                                                                                                                                                                                                                                                                                                                                                                                                                                          | Intervention                                                                                                                                                                                                                                                                                                                                                                                            | Outcome (change from baseline at study end)                                                                                                                                                                                                                                                                                                                                                                                                                                                                                                                                                                                                                                                                                                                                                                                                                                                                                                                                                                                                                                                                                                                                                                                                                                                                                                                                                                                                                                                                                                                                                                                                                                                                                                                                                                                                                                                                                                                                                                                                                                                 |            |       |             |          |       |  |            |      |            |          |       |  |            |       |         |          |      |  |            |             |         |  |             |  |          |             |  |  |             |  |  |                       |          |            |      |            |          |      |  |            |       |         |          |       |  |            |      |         |          |       |  |            |       |           |          |      |  |            |             |         |  |             |  |
|------------------------------------------------------------------------|-------------------------------------------------------------------------------------------------------------------------------------------------------------------------------------------------------------------------------------------------------------------------------------------------------------------------------------------------------------------------------------------------------------------------------------------------------------------------------------------------------------------------------------------------------------------------------------------------------------------------------------------------------------------------------------------------------------------------------------------------------------------------------------------------------------------------------------------------------------------------------------------------------------------------------------------------------------------------------------------------------------------------------------------|---------------------------------------------------------------------------------------------------------------------------------------------------------------------------------------------------------------------------------------------------------------------------------------------------------------------------------------------------------------------------------------------------------|---------------------------------------------------------------------------------------------------------------------------------------------------------------------------------------------------------------------------------------------------------------------------------------------------------------------------------------------------------------------------------------------------------------------------------------------------------------------------------------------------------------------------------------------------------------------------------------------------------------------------------------------------------------------------------------------------------------------------------------------------------------------------------------------------------------------------------------------------------------------------------------------------------------------------------------------------------------------------------------------------------------------------------------------------------------------------------------------------------------------------------------------------------------------------------------------------------------------------------------------------------------------------------------------------------------------------------------------------------------------------------------------------------------------------------------------------------------------------------------------------------------------------------------------------------------------------------------------------------------------------------------------------------------------------------------------------------------------------------------------------------------------------------------------------------------------------------------------------------------------------------------------------------------------------------------------------------------------------------------------------------------------------------------------------------------------------------------------|------------|-------|-------------|----------|-------|--|------------|------|------------|----------|-------|--|------------|-------|---------|----------|------|--|------------|-------------|---------|--|-------------|--|----------|-------------|--|--|-------------|--|--|-----------------------|----------|------------|------|------------|----------|------|--|------------|-------|---------|----------|-------|--|------------|------|---------|----------|-------|--|------------|-------|-----------|----------|------|--|------------|-------------|---------|--|-------------|--|
| <p><b>Follow-up:</b> 2 years (primary efficacy endpoint at 1 year)</p> | <p>grid photocoagulation within prior 16 weeks; panretinal photocoagulation &lt;6 months before baseline or likely to be needed within 9 months; significant media opacities; intraocular surgery in prior 6 months; pathologic high myopia; prior radiation in region of study eye; history of severe cardiac or peripheral vascular disease, stroke in prior 12 months, major surgery in prior 1 month, treatment in prior 90 days with any investigational agent or with bevacizumab for any nonocular condition, HbA1c ≥10% or signs of uncontrolled diabetes, hypertension, known relevant allergies; pregnant or lactating<br/> <b>Age:</b> 62.3 to 62.5 SD9.3 to 10.2 years<br/> <b>Sex:</b> 39 to 46% female<br/> <b>Diabetes type:</b> 6.3 to 7.5% type 1 DM, 92.5 to 93.7% type 2 DM<br/> <b>HbA1c:</b> 42.5 to 45.9% &lt;7.6%, 54.1 to 57.5% &gt;7.6%<br/> <b>Baseline VA:</b> letter score 57.0 to 57.5 SD8.1 to 8.9<br/> <b>Baseline CMT:</b> 441.6 to 464.6 SD135.5 to 148.5 μm<br/> <b>Comorbidities:</b> not reported</p> | <p><b>Regimen for all groups:</b> injections every 6 weeks up to week 48 (9 injections); at investigator determination (ETDRS criteria), laser photocoagulation could be performed at week 18, with possible repeat treatment at a minimum of 17 weeks later (maximum 3 treatments per year) (laser treatments in 25.2% of IVP group and 45% of C group); in year 2, injections as judged necessary</p> | <p><b>Outcome (change from baseline at study end)</b></p> <p><b>letters</b></p> <table border="1"> <tr> <td><i>IVP</i></td> <td>36.8%</td> <td>0.0047 vs C</td> </tr> <tr> <td><i>C</i></td> <td>19.7%</td> <td></td> </tr> </table> <p><b>Retinopathy:</b></p> <p><b>increase in degree by ≥2 steps</b></p> <table border="1"> <tr> <td><i>IVP</i></td> <td>4.1%</td> <td>0.047 vs C</td> </tr> <tr> <td><i>C</i></td> <td>12.4%</td> <td></td> </tr> </table> <p><b>decrease in degree by ≥2 steps</b></p> <table border="1"> <tr> <td><i>IVP</i></td> <td>10.2%</td> <td>NS vs C</td> </tr> <tr> <td><i>C</i></td> <td>3.1%</td> <td></td> </tr> </table> <p><b>CMT (OCT):</b></p> <p><b>decrease in CMT</b></p> <table border="1"> <tr> <td><i>IVP</i></td> <td>≥25%: 31.7%</td> <td>NS vs C</td> </tr> <tr> <td></td> <td>≥50%: 14.6%</td> <td></td> </tr> <tr> <td><i>C</i></td> <td>≥25%: 23.7%</td> <td></td> </tr> <tr> <td></td> <td>≥50%: 11.9%</td> <td></td> </tr> </table> <p><b>At 2 years</b></p> <p><b>BCVA (ETDRS):</b></p> <table border="1"> <tr> <td></td> <td><b>BCVA (letters)</b></td> <td><b>p</b></td> </tr> <tr> <td><i>IVP</i></td> <td>+6.1</td> <td>&lt;0.01 vs C</td> </tr> <tr> <td><i>C</i></td> <td>+1.3</td> <td></td> </tr> </table> <p><b>plus ≥10 letters</b></p> <table border="1"> <tr> <td><i>IVP</i></td> <td>38.3%</td> <td>NS vs C</td> </tr> <tr> <td><i>C</i></td> <td>30.0%</td> <td></td> </tr> </table> <p><b>Retinopathy:</b></p> <p><b>increase in degree by ≥2 steps</b></p> <table border="1"> <tr> <td><i>IVP</i></td> <td>6.3%</td> <td>NS vs C</td> </tr> <tr> <td><i>C</i></td> <td>13.8%</td> <td></td> </tr> </table> <p><b>decrease in degree by ≥2 steps</b></p> <table border="1"> <tr> <td><i>IVP</i></td> <td>16.3%</td> <td>0.03 vs C</td> </tr> <tr> <td><i>C</i></td> <td>3.8%</td> <td></td> </tr> </table> <p><b>CMT (OCT):</b></p> <p><b>decrease in CMT</b></p> <table border="1"> <tr> <td><i>IVP</i></td> <td>≥25%: 40.4%</td> <td>NS vs C</td> </tr> <tr> <td></td> <td>≥50%: 19.2%</td> <td></td> </tr> </table> | <i>IVP</i> | 36.8% | 0.0047 vs C | <i>C</i> | 19.7% |  | <i>IVP</i> | 4.1% | 0.047 vs C | <i>C</i> | 12.4% |  | <i>IVP</i> | 10.2% | NS vs C | <i>C</i> | 3.1% |  | <i>IVP</i> | ≥25%: 31.7% | NS vs C |  | ≥50%: 14.6% |  | <i>C</i> | ≥25%: 23.7% |  |  | ≥50%: 11.9% |  |  | <b>BCVA (letters)</b> | <b>p</b> | <i>IVP</i> | +6.1 | <0.01 vs C | <i>C</i> | +1.3 |  | <i>IVP</i> | 38.3% | NS vs C | <i>C</i> | 30.0% |  | <i>IVP</i> | 6.3% | NS vs C | <i>C</i> | 13.8% |  | <i>IVP</i> | 16.3% | 0.03 vs C | <i>C</i> | 3.8% |  | <i>IVP</i> | ≥25%: 40.4% | NS vs C |  | ≥50%: 19.2% |  |
| <i>IVP</i>                                                             | 36.8%                                                                                                                                                                                                                                                                                                                                                                                                                                                                                                                                                                                                                                                                                                                                                                                                                                                                                                                                                                                                                                     | 0.0047 vs C                                                                                                                                                                                                                                                                                                                                                                                             |                                                                                                                                                                                                                                                                                                                                                                                                                                                                                                                                                                                                                                                                                                                                                                                                                                                                                                                                                                                                                                                                                                                                                                                                                                                                                                                                                                                                                                                                                                                                                                                                                                                                                                                                                                                                                                                                                                                                                                                                                                                                                             |            |       |             |          |       |  |            |      |            |          |       |  |            |       |         |          |      |  |            |             |         |  |             |  |          |             |  |  |             |  |  |                       |          |            |      |            |          |      |  |            |       |         |          |       |  |            |      |         |          |       |  |            |       |           |          |      |  |            |             |         |  |             |  |
| <i>C</i>                                                               | 19.7%                                                                                                                                                                                                                                                                                                                                                                                                                                                                                                                                                                                                                                                                                                                                                                                                                                                                                                                                                                                                                                     |                                                                                                                                                                                                                                                                                                                                                                                                         |                                                                                                                                                                                                                                                                                                                                                                                                                                                                                                                                                                                                                                                                                                                                                                                                                                                                                                                                                                                                                                                                                                                                                                                                                                                                                                                                                                                                                                                                                                                                                                                                                                                                                                                                                                                                                                                                                                                                                                                                                                                                                             |            |       |             |          |       |  |            |      |            |          |       |  |            |       |         |          |      |  |            |             |         |  |             |  |          |             |  |  |             |  |  |                       |          |            |      |            |          |      |  |            |       |         |          |       |  |            |      |         |          |       |  |            |       |           |          |      |  |            |             |         |  |             |  |
| <i>IVP</i>                                                             | 4.1%                                                                                                                                                                                                                                                                                                                                                                                                                                                                                                                                                                                                                                                                                                                                                                                                                                                                                                                                                                                                                                      | 0.047 vs C                                                                                                                                                                                                                                                                                                                                                                                              |                                                                                                                                                                                                                                                                                                                                                                                                                                                                                                                                                                                                                                                                                                                                                                                                                                                                                                                                                                                                                                                                                                                                                                                                                                                                                                                                                                                                                                                                                                                                                                                                                                                                                                                                                                                                                                                                                                                                                                                                                                                                                             |            |       |             |          |       |  |            |      |            |          |       |  |            |       |         |          |      |  |            |             |         |  |             |  |          |             |  |  |             |  |  |                       |          |            |      |            |          |      |  |            |       |         |          |       |  |            |      |         |          |       |  |            |       |           |          |      |  |            |             |         |  |             |  |
| <i>C</i>                                                               | 12.4%                                                                                                                                                                                                                                                                                                                                                                                                                                                                                                                                                                                                                                                                                                                                                                                                                                                                                                                                                                                                                                     |                                                                                                                                                                                                                                                                                                                                                                                                         |                                                                                                                                                                                                                                                                                                                                                                                                                                                                                                                                                                                                                                                                                                                                                                                                                                                                                                                                                                                                                                                                                                                                                                                                                                                                                                                                                                                                                                                                                                                                                                                                                                                                                                                                                                                                                                                                                                                                                                                                                                                                                             |            |       |             |          |       |  |            |      |            |          |       |  |            |       |         |          |      |  |            |             |         |  |             |  |          |             |  |  |             |  |  |                       |          |            |      |            |          |      |  |            |       |         |          |       |  |            |      |         |          |       |  |            |       |           |          |      |  |            |             |         |  |             |  |
| <i>IVP</i>                                                             | 10.2%                                                                                                                                                                                                                                                                                                                                                                                                                                                                                                                                                                                                                                                                                                                                                                                                                                                                                                                                                                                                                                     | NS vs C                                                                                                                                                                                                                                                                                                                                                                                                 |                                                                                                                                                                                                                                                                                                                                                                                                                                                                                                                                                                                                                                                                                                                                                                                                                                                                                                                                                                                                                                                                                                                                                                                                                                                                                                                                                                                                                                                                                                                                                                                                                                                                                                                                                                                                                                                                                                                                                                                                                                                                                             |            |       |             |          |       |  |            |      |            |          |       |  |            |       |         |          |      |  |            |             |         |  |             |  |          |             |  |  |             |  |  |                       |          |            |      |            |          |      |  |            |       |         |          |       |  |            |      |         |          |       |  |            |       |           |          |      |  |            |             |         |  |             |  |
| <i>C</i>                                                               | 3.1%                                                                                                                                                                                                                                                                                                                                                                                                                                                                                                                                                                                                                                                                                                                                                                                                                                                                                                                                                                                                                                      |                                                                                                                                                                                                                                                                                                                                                                                                         |                                                                                                                                                                                                                                                                                                                                                                                                                                                                                                                                                                                                                                                                                                                                                                                                                                                                                                                                                                                                                                                                                                                                                                                                                                                                                                                                                                                                                                                                                                                                                                                                                                                                                                                                                                                                                                                                                                                                                                                                                                                                                             |            |       |             |          |       |  |            |      |            |          |       |  |            |       |         |          |      |  |            |             |         |  |             |  |          |             |  |  |             |  |  |                       |          |            |      |            |          |      |  |            |       |         |          |       |  |            |      |         |          |       |  |            |       |           |          |      |  |            |             |         |  |             |  |
| <i>IVP</i>                                                             | ≥25%: 31.7%                                                                                                                                                                                                                                                                                                                                                                                                                                                                                                                                                                                                                                                                                                                                                                                                                                                                                                                                                                                                                               | NS vs C                                                                                                                                                                                                                                                                                                                                                                                                 |                                                                                                                                                                                                                                                                                                                                                                                                                                                                                                                                                                                                                                                                                                                                                                                                                                                                                                                                                                                                                                                                                                                                                                                                                                                                                                                                                                                                                                                                                                                                                                                                                                                                                                                                                                                                                                                                                                                                                                                                                                                                                             |            |       |             |          |       |  |            |      |            |          |       |  |            |       |         |          |      |  |            |             |         |  |             |  |          |             |  |  |             |  |  |                       |          |            |      |            |          |      |  |            |       |         |          |       |  |            |      |         |          |       |  |            |       |           |          |      |  |            |             |         |  |             |  |
|                                                                        | ≥50%: 14.6%                                                                                                                                                                                                                                                                                                                                                                                                                                                                                                                                                                                                                                                                                                                                                                                                                                                                                                                                                                                                                               |                                                                                                                                                                                                                                                                                                                                                                                                         |                                                                                                                                                                                                                                                                                                                                                                                                                                                                                                                                                                                                                                                                                                                                                                                                                                                                                                                                                                                                                                                                                                                                                                                                                                                                                                                                                                                                                                                                                                                                                                                                                                                                                                                                                                                                                                                                                                                                                                                                                                                                                             |            |       |             |          |       |  |            |      |            |          |       |  |            |       |         |          |      |  |            |             |         |  |             |  |          |             |  |  |             |  |  |                       |          |            |      |            |          |      |  |            |       |         |          |       |  |            |      |         |          |       |  |            |       |           |          |      |  |            |             |         |  |             |  |
| <i>C</i>                                                               | ≥25%: 23.7%                                                                                                                                                                                                                                                                                                                                                                                                                                                                                                                                                                                                                                                                                                                                                                                                                                                                                                                                                                                                                               |                                                                                                                                                                                                                                                                                                                                                                                                         |                                                                                                                                                                                                                                                                                                                                                                                                                                                                                                                                                                                                                                                                                                                                                                                                                                                                                                                                                                                                                                                                                                                                                                                                                                                                                                                                                                                                                                                                                                                                                                                                                                                                                                                                                                                                                                                                                                                                                                                                                                                                                             |            |       |             |          |       |  |            |      |            |          |       |  |            |       |         |          |      |  |            |             |         |  |             |  |          |             |  |  |             |  |  |                       |          |            |      |            |          |      |  |            |       |         |          |       |  |            |      |         |          |       |  |            |       |           |          |      |  |            |             |         |  |             |  |
|                                                                        | ≥50%: 11.9%                                                                                                                                                                                                                                                                                                                                                                                                                                                                                                                                                                                                                                                                                                                                                                                                                                                                                                                                                                                                                               |                                                                                                                                                                                                                                                                                                                                                                                                         |                                                                                                                                                                                                                                                                                                                                                                                                                                                                                                                                                                                                                                                                                                                                                                                                                                                                                                                                                                                                                                                                                                                                                                                                                                                                                                                                                                                                                                                                                                                                                                                                                                                                                                                                                                                                                                                                                                                                                                                                                                                                                             |            |       |             |          |       |  |            |      |            |          |       |  |            |       |         |          |      |  |            |             |         |  |             |  |          |             |  |  |             |  |  |                       |          |            |      |            |          |      |  |            |       |         |          |       |  |            |      |         |          |       |  |            |       |           |          |      |  |            |             |         |  |             |  |
|                                                                        | <b>BCVA (letters)</b>                                                                                                                                                                                                                                                                                                                                                                                                                                                                                                                                                                                                                                                                                                                                                                                                                                                                                                                                                                                                                     | <b>p</b>                                                                                                                                                                                                                                                                                                                                                                                                |                                                                                                                                                                                                                                                                                                                                                                                                                                                                                                                                                                                                                                                                                                                                                                                                                                                                                                                                                                                                                                                                                                                                                                                                                                                                                                                                                                                                                                                                                                                                                                                                                                                                                                                                                                                                                                                                                                                                                                                                                                                                                             |            |       |             |          |       |  |            |      |            |          |       |  |            |       |         |          |      |  |            |             |         |  |             |  |          |             |  |  |             |  |  |                       |          |            |      |            |          |      |  |            |       |         |          |       |  |            |      |         |          |       |  |            |       |           |          |      |  |            |             |         |  |             |  |
| <i>IVP</i>                                                             | +6.1                                                                                                                                                                                                                                                                                                                                                                                                                                                                                                                                                                                                                                                                                                                                                                                                                                                                                                                                                                                                                                      | <0.01 vs C                                                                                                                                                                                                                                                                                                                                                                                              |                                                                                                                                                                                                                                                                                                                                                                                                                                                                                                                                                                                                                                                                                                                                                                                                                                                                                                                                                                                                                                                                                                                                                                                                                                                                                                                                                                                                                                                                                                                                                                                                                                                                                                                                                                                                                                                                                                                                                                                                                                                                                             |            |       |             |          |       |  |            |      |            |          |       |  |            |       |         |          |      |  |            |             |         |  |             |  |          |             |  |  |             |  |  |                       |          |            |      |            |          |      |  |            |       |         |          |       |  |            |      |         |          |       |  |            |       |           |          |      |  |            |             |         |  |             |  |
| <i>C</i>                                                               | +1.3                                                                                                                                                                                                                                                                                                                                                                                                                                                                                                                                                                                                                                                                                                                                                                                                                                                                                                                                                                                                                                      |                                                                                                                                                                                                                                                                                                                                                                                                         |                                                                                                                                                                                                                                                                                                                                                                                                                                                                                                                                                                                                                                                                                                                                                                                                                                                                                                                                                                                                                                                                                                                                                                                                                                                                                                                                                                                                                                                                                                                                                                                                                                                                                                                                                                                                                                                                                                                                                                                                                                                                                             |            |       |             |          |       |  |            |      |            |          |       |  |            |       |         |          |      |  |            |             |         |  |             |  |          |             |  |  |             |  |  |                       |          |            |      |            |          |      |  |            |       |         |          |       |  |            |      |         |          |       |  |            |       |           |          |      |  |            |             |         |  |             |  |
| <i>IVP</i>                                                             | 38.3%                                                                                                                                                                                                                                                                                                                                                                                                                                                                                                                                                                                                                                                                                                                                                                                                                                                                                                                                                                                                                                     | NS vs C                                                                                                                                                                                                                                                                                                                                                                                                 |                                                                                                                                                                                                                                                                                                                                                                                                                                                                                                                                                                                                                                                                                                                                                                                                                                                                                                                                                                                                                                                                                                                                                                                                                                                                                                                                                                                                                                                                                                                                                                                                                                                                                                                                                                                                                                                                                                                                                                                                                                                                                             |            |       |             |          |       |  |            |      |            |          |       |  |            |       |         |          |      |  |            |             |         |  |             |  |          |             |  |  |             |  |  |                       |          |            |      |            |          |      |  |            |       |         |          |       |  |            |      |         |          |       |  |            |       |           |          |      |  |            |             |         |  |             |  |
| <i>C</i>                                                               | 30.0%                                                                                                                                                                                                                                                                                                                                                                                                                                                                                                                                                                                                                                                                                                                                                                                                                                                                                                                                                                                                                                     |                                                                                                                                                                                                                                                                                                                                                                                                         |                                                                                                                                                                                                                                                                                                                                                                                                                                                                                                                                                                                                                                                                                                                                                                                                                                                                                                                                                                                                                                                                                                                                                                                                                                                                                                                                                                                                                                                                                                                                                                                                                                                                                                                                                                                                                                                                                                                                                                                                                                                                                             |            |       |             |          |       |  |            |      |            |          |       |  |            |       |         |          |      |  |            |             |         |  |             |  |          |             |  |  |             |  |  |                       |          |            |      |            |          |      |  |            |       |         |          |       |  |            |      |         |          |       |  |            |       |           |          |      |  |            |             |         |  |             |  |
| <i>IVP</i>                                                             | 6.3%                                                                                                                                                                                                                                                                                                                                                                                                                                                                                                                                                                                                                                                                                                                                                                                                                                                                                                                                                                                                                                      | NS vs C                                                                                                                                                                                                                                                                                                                                                                                                 |                                                                                                                                                                                                                                                                                                                                                                                                                                                                                                                                                                                                                                                                                                                                                                                                                                                                                                                                                                                                                                                                                                                                                                                                                                                                                                                                                                                                                                                                                                                                                                                                                                                                                                                                                                                                                                                                                                                                                                                                                                                                                             |            |       |             |          |       |  |            |      |            |          |       |  |            |       |         |          |      |  |            |             |         |  |             |  |          |             |  |  |             |  |  |                       |          |            |      |            |          |      |  |            |       |         |          |       |  |            |      |         |          |       |  |            |       |           |          |      |  |            |             |         |  |             |  |
| <i>C</i>                                                               | 13.8%                                                                                                                                                                                                                                                                                                                                                                                                                                                                                                                                                                                                                                                                                                                                                                                                                                                                                                                                                                                                                                     |                                                                                                                                                                                                                                                                                                                                                                                                         |                                                                                                                                                                                                                                                                                                                                                                                                                                                                                                                                                                                                                                                                                                                                                                                                                                                                                                                                                                                                                                                                                                                                                                                                                                                                                                                                                                                                                                                                                                                                                                                                                                                                                                                                                                                                                                                                                                                                                                                                                                                                                             |            |       |             |          |       |  |            |      |            |          |       |  |            |       |         |          |      |  |            |             |         |  |             |  |          |             |  |  |             |  |  |                       |          |            |      |            |          |      |  |            |       |         |          |       |  |            |      |         |          |       |  |            |       |           |          |      |  |            |             |         |  |             |  |
| <i>IVP</i>                                                             | 16.3%                                                                                                                                                                                                                                                                                                                                                                                                                                                                                                                                                                                                                                                                                                                                                                                                                                                                                                                                                                                                                                     | 0.03 vs C                                                                                                                                                                                                                                                                                                                                                                                               |                                                                                                                                                                                                                                                                                                                                                                                                                                                                                                                                                                                                                                                                                                                                                                                                                                                                                                                                                                                                                                                                                                                                                                                                                                                                                                                                                                                                                                                                                                                                                                                                                                                                                                                                                                                                                                                                                                                                                                                                                                                                                             |            |       |             |          |       |  |            |      |            |          |       |  |            |       |         |          |      |  |            |             |         |  |             |  |          |             |  |  |             |  |  |                       |          |            |      |            |          |      |  |            |       |         |          |       |  |            |      |         |          |       |  |            |       |           |          |      |  |            |             |         |  |             |  |
| <i>C</i>                                                               | 3.8%                                                                                                                                                                                                                                                                                                                                                                                                                                                                                                                                                                                                                                                                                                                                                                                                                                                                                                                                                                                                                                      |                                                                                                                                                                                                                                                                                                                                                                                                         |                                                                                                                                                                                                                                                                                                                                                                                                                                                                                                                                                                                                                                                                                                                                                                                                                                                                                                                                                                                                                                                                                                                                                                                                                                                                                                                                                                                                                                                                                                                                                                                                                                                                                                                                                                                                                                                                                                                                                                                                                                                                                             |            |       |             |          |       |  |            |      |            |          |       |  |            |       |         |          |      |  |            |             |         |  |             |  |          |             |  |  |             |  |  |                       |          |            |      |            |          |      |  |            |       |         |          |       |  |            |      |         |          |       |  |            |       |           |          |      |  |            |             |         |  |             |  |
| <i>IVP</i>                                                             | ≥25%: 40.4%                                                                                                                                                                                                                                                                                                                                                                                                                                                                                                                                                                                                                                                                                                                                                                                                                                                                                                                                                                                                                               | NS vs C                                                                                                                                                                                                                                                                                                                                                                                                 |                                                                                                                                                                                                                                                                                                                                                                                                                                                                                                                                                                                                                                                                                                                                                                                                                                                                                                                                                                                                                                                                                                                                                                                                                                                                                                                                                                                                                                                                                                                                                                                                                                                                                                                                                                                                                                                                                                                                                                                                                                                                                             |            |       |             |          |       |  |            |      |            |          |       |  |            |       |         |          |      |  |            |             |         |  |             |  |          |             |  |  |             |  |  |                       |          |            |      |            |          |      |  |            |       |         |          |       |  |            |      |         |          |       |  |            |       |           |          |      |  |            |             |         |  |             |  |
|                                                                        | ≥50%: 19.2%                                                                                                                                                                                                                                                                                                                                                                                                                                                                                                                                                                                                                                                                                                                                                                                                                                                                                                                                                                                                                               |                                                                                                                                                                                                                                                                                                                                                                                                         |                                                                                                                                                                                                                                                                                                                                                                                                                                                                                                                                                                                                                                                                                                                                                                                                                                                                                                                                                                                                                                                                                                                                                                                                                                                                                                                                                                                                                                                                                                                                                                                                                                                                                                                                                                                                                                                                                                                                                                                                                                                                                             |            |       |             |          |       |  |            |      |            |          |       |  |            |       |         |          |      |  |            |             |         |  |             |  |          |             |  |  |             |  |  |                       |          |            |      |            |          |      |  |            |       |         |          |       |  |            |      |         |          |       |  |            |       |           |          |      |  |            |             |         |  |             |  |

1  
2  
3  
4  
5  
6  
7  
8  
9  
10  
11  
12  
13  
14  
15  
16  
17  
18  
19  
20  
21  
22  
23  
24  
25  
26  
27  
28  
29  
30  
31  
32  
33  
34  
35  
36  
37  
38  
39  
40  
41  
42  
43  
44  
45  
46  
47  
48  
49

| Study | Participants and baseline values | Intervention | Outcome (change from baseline at study end)                                                                                                                                                                                                                                                                                                                                                                                                                            |
|-------|----------------------------------|--------------|------------------------------------------------------------------------------------------------------------------------------------------------------------------------------------------------------------------------------------------------------------------------------------------------------------------------------------------------------------------------------------------------------------------------------------------------------------------------|
|       |                                  |              | <p><b>C</b></p> <p>≥25%: 44.6%</p> <p>≥50%: 26.1%</p> <hr/> <p><b>QoL:</b></p> <ul style="list-style-type: none"> <li>• NEI VFQ-25: between group differences not significant at 54 weeks; at 102 weeks, significantly greater improvement in composite score and subscales distance vision activities, social functioning and mental health with pegaptanib</li> <li>• EQ-5D: no significant differences between groups in EQ-5D scores at weeks 54 or 102</li> </ul> |

For peer review only

| Study                                                                                                                                                          | Participants and baseline values                                                                                                                                                                                                                                                                                                                                                                                                                                                                                                                                                                                                                                                                                                                                                                                                                                                                                                                                                                                                                                                                                                                                                                                                                                                                                                                                                                                                                                                                                                                                                                                                                                                                                                                                                                                                                                                                                                                                                                                                                                                                                                                                                                                                                                                                                                                                                                                                                                                                                                                                                                                                                                                                         | Intervention                                                                                                                                                                                                                                                                                                                                                                                                                                                                                                         | Outcome (change from baseline at study end)                                                                                                                                                                                                                                                                                                                                                                                                                                                                                                                                                                                                                                                                                                                                                                                                                                                                                                                                                                                                                                                                                                                                                                                                                                                                                                                                                                                                                                                                                                                                                                                                                                                                                                                                                                                                                                                                                                                                                                                                                                                                                                                                                                                                                  |  |                |   |               |      |            |               |       |              |               |      |            |               |       |             |          |      |  |  |                         |  |               |     |    |               |     |    |               |     |    |               |     |    |          |     |    |  |         |  |               |        |             |               |        |              |               |        |            |               |        |              |          |       |  |  |                |   |               |       |              |               |       |              |               |      |              |               |       |              |          |      |  |  |                         |  |               |       |             |               |       |             |               |       |             |               |       |             |          |       |  |
|----------------------------------------------------------------------------------------------------------------------------------------------------------------|----------------------------------------------------------------------------------------------------------------------------------------------------------------------------------------------------------------------------------------------------------------------------------------------------------------------------------------------------------------------------------------------------------------------------------------------------------------------------------------------------------------------------------------------------------------------------------------------------------------------------------------------------------------------------------------------------------------------------------------------------------------------------------------------------------------------------------------------------------------------------------------------------------------------------------------------------------------------------------------------------------------------------------------------------------------------------------------------------------------------------------------------------------------------------------------------------------------------------------------------------------------------------------------------------------------------------------------------------------------------------------------------------------------------------------------------------------------------------------------------------------------------------------------------------------------------------------------------------------------------------------------------------------------------------------------------------------------------------------------------------------------------------------------------------------------------------------------------------------------------------------------------------------------------------------------------------------------------------------------------------------------------------------------------------------------------------------------------------------------------------------------------------------------------------------------------------------------------------------------------------------------------------------------------------------------------------------------------------------------------------------------------------------------------------------------------------------------------------------------------------------------------------------------------------------------------------------------------------------------------------------------------------------------------------------------------------------|----------------------------------------------------------------------------------------------------------------------------------------------------------------------------------------------------------------------------------------------------------------------------------------------------------------------------------------------------------------------------------------------------------------------------------------------------------------------------------------------------------------------|--------------------------------------------------------------------------------------------------------------------------------------------------------------------------------------------------------------------------------------------------------------------------------------------------------------------------------------------------------------------------------------------------------------------------------------------------------------------------------------------------------------------------------------------------------------------------------------------------------------------------------------------------------------------------------------------------------------------------------------------------------------------------------------------------------------------------------------------------------------------------------------------------------------------------------------------------------------------------------------------------------------------------------------------------------------------------------------------------------------------------------------------------------------------------------------------------------------------------------------------------------------------------------------------------------------------------------------------------------------------------------------------------------------------------------------------------------------------------------------------------------------------------------------------------------------------------------------------------------------------------------------------------------------------------------------------------------------------------------------------------------------------------------------------------------------------------------------------------------------------------------------------------------------------------------------------------------------------------------------------------------------------------------------------------------------------------------------------------------------------------------------------------------------------------------------------------------------------------------------------------------------|--|----------------|---|---------------|------|------------|---------------|-------|--------------|---------------|------|------------|---------------|-------|-------------|----------|------|--|--|-------------------------|--|---------------|-----|----|---------------|-----|----|---------------|-----|----|---------------|-----|----|----------|-----|----|--|---------|--|---------------|--------|-------------|---------------|--------|--------------|---------------|--------|------------|---------------|--------|--------------|----------|-------|--|--|----------------|---|---------------|-------|--------------|---------------|-------|--------------|---------------|------|--------------|---------------|-------|--------------|----------|------|--|--|-------------------------|--|---------------|-------|-------------|---------------|-------|-------------|---------------|-------|-------------|---------------|-------|-------------|----------|-------|--|
| <p><i>Aflibercept</i></p> <p><b>DA VINCI 2010 (Do 2011)</b><br/>Multicenter[30,58]</p> <p><b>Design:</b> 5-arm phase II RCT<br/><b>Follow-up:</b> 24 weeks</p> | <p><b>N:</b> 221 eyes of 221 patients</p> <p><b>Inclusion criteria:</b> aged &gt;18 years and diagnosed with type 1 or 2 diabetes mellitus, with DMO involving the central macula defined as CRT (&gt;250 um in the central subfield. Participants were required to have BCVA letter score at 4 m of 73 to 24. Women of childbearing potential were included only if they were willing to not become pregnant and to use a reliable form of birth control during the study period.</p> <p><b>Exclusion criteria:</b> history of vitreoretinal surgery; panretinal or macular laser photocoagulation or use of intraocular or periocular corticosteroids or anti-angiogenic drugs within 3 months of screening; vision decrease due to causes other than DMO; proliferative diabetic retinopathy (unless regressed and currently inactive); ocular inflammation; cataract or other intraocular surgery within 3 months of screening, laser capsulotomy within 2 months of screening; aphakia; spherical equivalent of &gt;8 diopters; or any concurrent disease that would compromise visual acuity or require medical or surgical intervention during the study period: active iris neovascularization, vitreous hemorrhage, traction retinal detachment, or preretinal fibrosis involving the macula; visually significant vitreomacular traction or epiretinal membrane evident biomicroscopically or on OCT; history of idiopathic or autoimmune uveitis; structural damage to the center of the macula that is likely to preclude improvement in visual acuity after the resolution of macular oedema; uncontrolled glaucoma or previous filtration surgery; infectious blepharitis, keratitis, scleritis, or conjunctivitis; or current treatment for serious systemic infection: uncontrolled diabetes mellitus; uncontrolled hypertension; history of cerebral vascular accident or myocardial infarction within 6 months; renal failure requiring dialysis or renal transplant; pregnancy or lactation; history of allergy to fluorescein or povidone iodine; only 1 functional eye (even if the eye met all other entry criteria); or an ocular condition in the fellow eye with a poorer prognosis than the study eye</p> <p><b>Age:</b> 60.7 to 64.0 years (SD 8.1 to 11.5)<br/><b>Sex:</b> % female 35.6% to 47.6%<br/><b>Diabetes type:</b> % type 2, 88.6% to 97.7%<br/><b>HbA1c:</b> 7.85 to 8.10 (SD 1.71 to 1.94)<br/><b>Baseline VA:</b> 57.6 to 59.9 (SD 10.1 to 12.5)<br/><b>Baseline CMT:</b> 426.1 um to 456.6 um (SD 111.8 to 152.4)<br/><b>Co morbidities:</b> history of any cardiac disease was twice as common in the VEGF Trap-Eye groups compared with the laser group.</p> | <p>Trial of VEGF Trap-Eye (VTE), randomized on a 1:1:1:1:1 basis</p> <p><b>Group 1 (IVVTE1, n=44 eyes):</b> IV VTE, 0.5 mg every 4 weeks</p> <p><b>Group 2 (IVVTE2, n=44 eyes):</b> IV VTE, 2 mg every 4 weeks</p> <p><b>Group 3 (IVVTE3, n=42 eyes):</b> IV VTE, 2 mg for 3 initial months then every 8 weeks</p> <p><b>Group 4 (IVVTE4, n=45 eyes):</b> IV VTE, 2 mg for 3 initial months then as needed</p> <p><b>Group 5 (L, n=44 eyes):</b> laser photocoagulation<br/><b>Laser Modified ETDRS protocol</b></p> | <p><b>At 6 months</b></p> <table border="1"> <thead> <tr> <th></th> <th>BCVA (letters)</th> <th>p</th> </tr> </thead> <tbody> <tr> <td><i>IVVTE1</i></td> <td>+8.6</td> <td>0.005 vs L</td> </tr> <tr> <td><i>IVVTE2</i></td> <td>+11.4</td> <td>&lt;0.0001 vs L</td> </tr> <tr> <td><i>IVVTE3</i></td> <td>+8.5</td> <td>0.008 vs L</td> </tr> <tr> <td><i>IVVTE3</i></td> <td>+10.3</td> <td>0.0004 vs L</td> </tr> <tr> <td><i>L</i></td> <td>+2.5</td> <td></td> </tr> <tr> <td></td> <td><b>plus ≥10 letters</b></td> <td></td> </tr> <tr> <td><i>IVVTE1</i></td> <td>50%</td> <td>NR</td> </tr> <tr> <td><i>IVVTE2</i></td> <td>64%</td> <td>NR</td> </tr> <tr> <td><i>IVVTE3</i></td> <td>43%</td> <td>NR</td> </tr> <tr> <td><i>IVVTE3</i></td> <td>58%</td> <td>NR</td> </tr> <tr> <td><i>L</i></td> <td>32%</td> <td>NR</td> </tr> </tbody> </table><br><table border="1"> <thead> <tr> <th></th> <th colspan="2">CMT(um)</th> </tr> </thead> <tbody> <tr> <td><i>IVVTE1</i></td> <td>-144.6</td> <td>0.0002 vs L</td> </tr> <tr> <td><i>IVVTE2</i></td> <td>-194.5</td> <td>&lt;0.0001 vs L</td> </tr> <tr> <td><i>IVVTE3</i></td> <td>-127.3</td> <td>0.007 vs L</td> </tr> <tr> <td><i>IVVTE3</i></td> <td>-153.3</td> <td>&lt;0.0001 vs L</td> </tr> <tr> <td><i>L</i></td> <td>-67.9</td> <td></td> </tr> </tbody> </table><br><p><b>At 12 months</b></p> <table border="1"> <thead> <tr> <th></th> <th>BCVA (letters)</th> <th>p</th> </tr> </thead> <tbody> <tr> <td><i>IVVTE1</i></td> <td>+11.0</td> <td>≤0.0001 vs L</td> </tr> <tr> <td><i>IVVTE2</i></td> <td>+13.1</td> <td>≤0.0001 vs L</td> </tr> <tr> <td><i>IVVTE3</i></td> <td>+9.7</td> <td>≤0.0001 vs L</td> </tr> <tr> <td><i>IVVTE3</i></td> <td>+12.0</td> <td>≤0.0001 vs L</td> </tr> <tr> <td><i>L</i></td> <td>-1.3</td> <td></td> </tr> <tr> <td></td> <td><b>plus ≥15 letters</b></td> <td></td> </tr> <tr> <td><i>IVVTE1</i></td> <td>40.9%</td> <td>0.0031 vs L</td> </tr> <tr> <td><i>IVVTE2</i></td> <td>45.5%</td> <td>0.0007 vs L</td> </tr> <tr> <td><i>IVVTE3</i></td> <td>23.8%</td> <td>0.1608 vs L</td> </tr> <tr> <td><i>IVVTE3</i></td> <td>42.2%</td> <td>0.0016 vs L</td> </tr> <tr> <td><i>L</i></td> <td>11.4%</td> <td></td> </tr> </tbody> </table> |  | BCVA (letters) | p | <i>IVVTE1</i> | +8.6 | 0.005 vs L | <i>IVVTE2</i> | +11.4 | <0.0001 vs L | <i>IVVTE3</i> | +8.5 | 0.008 vs L | <i>IVVTE3</i> | +10.3 | 0.0004 vs L | <i>L</i> | +2.5 |  |  | <b>plus ≥10 letters</b> |  | <i>IVVTE1</i> | 50% | NR | <i>IVVTE2</i> | 64% | NR | <i>IVVTE3</i> | 43% | NR | <i>IVVTE3</i> | 58% | NR | <i>L</i> | 32% | NR |  | CMT(um) |  | <i>IVVTE1</i> | -144.6 | 0.0002 vs L | <i>IVVTE2</i> | -194.5 | <0.0001 vs L | <i>IVVTE3</i> | -127.3 | 0.007 vs L | <i>IVVTE3</i> | -153.3 | <0.0001 vs L | <i>L</i> | -67.9 |  |  | BCVA (letters) | p | <i>IVVTE1</i> | +11.0 | ≤0.0001 vs L | <i>IVVTE2</i> | +13.1 | ≤0.0001 vs L | <i>IVVTE3</i> | +9.7 | ≤0.0001 vs L | <i>IVVTE3</i> | +12.0 | ≤0.0001 vs L | <i>L</i> | -1.3 |  |  | <b>plus ≥15 letters</b> |  | <i>IVVTE1</i> | 40.9% | 0.0031 vs L | <i>IVVTE2</i> | 45.5% | 0.0007 vs L | <i>IVVTE3</i> | 23.8% | 0.1608 vs L | <i>IVVTE3</i> | 42.2% | 0.0016 vs L | <i>L</i> | 11.4% |  |
|                                                                                                                                                                | BCVA (letters)                                                                                                                                                                                                                                                                                                                                                                                                                                                                                                                                                                                                                                                                                                                                                                                                                                                                                                                                                                                                                                                                                                                                                                                                                                                                                                                                                                                                                                                                                                                                                                                                                                                                                                                                                                                                                                                                                                                                                                                                                                                                                                                                                                                                                                                                                                                                                                                                                                                                                                                                                                                                                                                                                           | p                                                                                                                                                                                                                                                                                                                                                                                                                                                                                                                    |                                                                                                                                                                                                                                                                                                                                                                                                                                                                                                                                                                                                                                                                                                                                                                                                                                                                                                                                                                                                                                                                                                                                                                                                                                                                                                                                                                                                                                                                                                                                                                                                                                                                                                                                                                                                                                                                                                                                                                                                                                                                                                                                                                                                                                                              |  |                |   |               |      |            |               |       |              |               |      |            |               |       |             |          |      |  |  |                         |  |               |     |    |               |     |    |               |     |    |               |     |    |          |     |    |  |         |  |               |        |             |               |        |              |               |        |            |               |        |              |          |       |  |  |                |   |               |       |              |               |       |              |               |      |              |               |       |              |          |      |  |  |                         |  |               |       |             |               |       |             |               |       |             |               |       |             |          |       |  |
| <i>IVVTE1</i>                                                                                                                                                  | +8.6                                                                                                                                                                                                                                                                                                                                                                                                                                                                                                                                                                                                                                                                                                                                                                                                                                                                                                                                                                                                                                                                                                                                                                                                                                                                                                                                                                                                                                                                                                                                                                                                                                                                                                                                                                                                                                                                                                                                                                                                                                                                                                                                                                                                                                                                                                                                                                                                                                                                                                                                                                                                                                                                                                     | 0.005 vs L                                                                                                                                                                                                                                                                                                                                                                                                                                                                                                           |                                                                                                                                                                                                                                                                                                                                                                                                                                                                                                                                                                                                                                                                                                                                                                                                                                                                                                                                                                                                                                                                                                                                                                                                                                                                                                                                                                                                                                                                                                                                                                                                                                                                                                                                                                                                                                                                                                                                                                                                                                                                                                                                                                                                                                                              |  |                |   |               |      |            |               |       |              |               |      |            |               |       |             |          |      |  |  |                         |  |               |     |    |               |     |    |               |     |    |               |     |    |          |     |    |  |         |  |               |        |             |               |        |              |               |        |            |               |        |              |          |       |  |  |                |   |               |       |              |               |       |              |               |      |              |               |       |              |          |      |  |  |                         |  |               |       |             |               |       |             |               |       |             |               |       |             |          |       |  |
| <i>IVVTE2</i>                                                                                                                                                  | +11.4                                                                                                                                                                                                                                                                                                                                                                                                                                                                                                                                                                                                                                                                                                                                                                                                                                                                                                                                                                                                                                                                                                                                                                                                                                                                                                                                                                                                                                                                                                                                                                                                                                                                                                                                                                                                                                                                                                                                                                                                                                                                                                                                                                                                                                                                                                                                                                                                                                                                                                                                                                                                                                                                                                    | <0.0001 vs L                                                                                                                                                                                                                                                                                                                                                                                                                                                                                                         |                                                                                                                                                                                                                                                                                                                                                                                                                                                                                                                                                                                                                                                                                                                                                                                                                                                                                                                                                                                                                                                                                                                                                                                                                                                                                                                                                                                                                                                                                                                                                                                                                                                                                                                                                                                                                                                                                                                                                                                                                                                                                                                                                                                                                                                              |  |                |   |               |      |            |               |       |              |               |      |            |               |       |             |          |      |  |  |                         |  |               |     |    |               |     |    |               |     |    |               |     |    |          |     |    |  |         |  |               |        |             |               |        |              |               |        |            |               |        |              |          |       |  |  |                |   |               |       |              |               |       |              |               |      |              |               |       |              |          |      |  |  |                         |  |               |       |             |               |       |             |               |       |             |               |       |             |          |       |  |
| <i>IVVTE3</i>                                                                                                                                                  | +8.5                                                                                                                                                                                                                                                                                                                                                                                                                                                                                                                                                                                                                                                                                                                                                                                                                                                                                                                                                                                                                                                                                                                                                                                                                                                                                                                                                                                                                                                                                                                                                                                                                                                                                                                                                                                                                                                                                                                                                                                                                                                                                                                                                                                                                                                                                                                                                                                                                                                                                                                                                                                                                                                                                                     | 0.008 vs L                                                                                                                                                                                                                                                                                                                                                                                                                                                                                                           |                                                                                                                                                                                                                                                                                                                                                                                                                                                                                                                                                                                                                                                                                                                                                                                                                                                                                                                                                                                                                                                                                                                                                                                                                                                                                                                                                                                                                                                                                                                                                                                                                                                                                                                                                                                                                                                                                                                                                                                                                                                                                                                                                                                                                                                              |  |                |   |               |      |            |               |       |              |               |      |            |               |       |             |          |      |  |  |                         |  |               |     |    |               |     |    |               |     |    |               |     |    |          |     |    |  |         |  |               |        |             |               |        |              |               |        |            |               |        |              |          |       |  |  |                |   |               |       |              |               |       |              |               |      |              |               |       |              |          |      |  |  |                         |  |               |       |             |               |       |             |               |       |             |               |       |             |          |       |  |
| <i>IVVTE3</i>                                                                                                                                                  | +10.3                                                                                                                                                                                                                                                                                                                                                                                                                                                                                                                                                                                                                                                                                                                                                                                                                                                                                                                                                                                                                                                                                                                                                                                                                                                                                                                                                                                                                                                                                                                                                                                                                                                                                                                                                                                                                                                                                                                                                                                                                                                                                                                                                                                                                                                                                                                                                                                                                                                                                                                                                                                                                                                                                                    | 0.0004 vs L                                                                                                                                                                                                                                                                                                                                                                                                                                                                                                          |                                                                                                                                                                                                                                                                                                                                                                                                                                                                                                                                                                                                                                                                                                                                                                                                                                                                                                                                                                                                                                                                                                                                                                                                                                                                                                                                                                                                                                                                                                                                                                                                                                                                                                                                                                                                                                                                                                                                                                                                                                                                                                                                                                                                                                                              |  |                |   |               |      |            |               |       |              |               |      |            |               |       |             |          |      |  |  |                         |  |               |     |    |               |     |    |               |     |    |               |     |    |          |     |    |  |         |  |               |        |             |               |        |              |               |        |            |               |        |              |          |       |  |  |                |   |               |       |              |               |       |              |               |      |              |               |       |              |          |      |  |  |                         |  |               |       |             |               |       |             |               |       |             |               |       |             |          |       |  |
| <i>L</i>                                                                                                                                                       | +2.5                                                                                                                                                                                                                                                                                                                                                                                                                                                                                                                                                                                                                                                                                                                                                                                                                                                                                                                                                                                                                                                                                                                                                                                                                                                                                                                                                                                                                                                                                                                                                                                                                                                                                                                                                                                                                                                                                                                                                                                                                                                                                                                                                                                                                                                                                                                                                                                                                                                                                                                                                                                                                                                                                                     |                                                                                                                                                                                                                                                                                                                                                                                                                                                                                                                      |                                                                                                                                                                                                                                                                                                                                                                                                                                                                                                                                                                                                                                                                                                                                                                                                                                                                                                                                                                                                                                                                                                                                                                                                                                                                                                                                                                                                                                                                                                                                                                                                                                                                                                                                                                                                                                                                                                                                                                                                                                                                                                                                                                                                                                                              |  |                |   |               |      |            |               |       |              |               |      |            |               |       |             |          |      |  |  |                         |  |               |     |    |               |     |    |               |     |    |               |     |    |          |     |    |  |         |  |               |        |             |               |        |              |               |        |            |               |        |              |          |       |  |  |                |   |               |       |              |               |       |              |               |      |              |               |       |              |          |      |  |  |                         |  |               |       |             |               |       |             |               |       |             |               |       |             |          |       |  |
|                                                                                                                                                                | <b>plus ≥10 letters</b>                                                                                                                                                                                                                                                                                                                                                                                                                                                                                                                                                                                                                                                                                                                                                                                                                                                                                                                                                                                                                                                                                                                                                                                                                                                                                                                                                                                                                                                                                                                                                                                                                                                                                                                                                                                                                                                                                                                                                                                                                                                                                                                                                                                                                                                                                                                                                                                                                                                                                                                                                                                                                                                                                  |                                                                                                                                                                                                                                                                                                                                                                                                                                                                                                                      |                                                                                                                                                                                                                                                                                                                                                                                                                                                                                                                                                                                                                                                                                                                                                                                                                                                                                                                                                                                                                                                                                                                                                                                                                                                                                                                                                                                                                                                                                                                                                                                                                                                                                                                                                                                                                                                                                                                                                                                                                                                                                                                                                                                                                                                              |  |                |   |               |      |            |               |       |              |               |      |            |               |       |             |          |      |  |  |                         |  |               |     |    |               |     |    |               |     |    |               |     |    |          |     |    |  |         |  |               |        |             |               |        |              |               |        |            |               |        |              |          |       |  |  |                |   |               |       |              |               |       |              |               |      |              |               |       |              |          |      |  |  |                         |  |               |       |             |               |       |             |               |       |             |               |       |             |          |       |  |
| <i>IVVTE1</i>                                                                                                                                                  | 50%                                                                                                                                                                                                                                                                                                                                                                                                                                                                                                                                                                                                                                                                                                                                                                                                                                                                                                                                                                                                                                                                                                                                                                                                                                                                                                                                                                                                                                                                                                                                                                                                                                                                                                                                                                                                                                                                                                                                                                                                                                                                                                                                                                                                                                                                                                                                                                                                                                                                                                                                                                                                                                                                                                      | NR                                                                                                                                                                                                                                                                                                                                                                                                                                                                                                                   |                                                                                                                                                                                                                                                                                                                                                                                                                                                                                                                                                                                                                                                                                                                                                                                                                                                                                                                                                                                                                                                                                                                                                                                                                                                                                                                                                                                                                                                                                                                                                                                                                                                                                                                                                                                                                                                                                                                                                                                                                                                                                                                                                                                                                                                              |  |                |   |               |      |            |               |       |              |               |      |            |               |       |             |          |      |  |  |                         |  |               |     |    |               |     |    |               |     |    |               |     |    |          |     |    |  |         |  |               |        |             |               |        |              |               |        |            |               |        |              |          |       |  |  |                |   |               |       |              |               |       |              |               |      |              |               |       |              |          |      |  |  |                         |  |               |       |             |               |       |             |               |       |             |               |       |             |          |       |  |
| <i>IVVTE2</i>                                                                                                                                                  | 64%                                                                                                                                                                                                                                                                                                                                                                                                                                                                                                                                                                                                                                                                                                                                                                                                                                                                                                                                                                                                                                                                                                                                                                                                                                                                                                                                                                                                                                                                                                                                                                                                                                                                                                                                                                                                                                                                                                                                                                                                                                                                                                                                                                                                                                                                                                                                                                                                                                                                                                                                                                                                                                                                                                      | NR                                                                                                                                                                                                                                                                                                                                                                                                                                                                                                                   |                                                                                                                                                                                                                                                                                                                                                                                                                                                                                                                                                                                                                                                                                                                                                                                                                                                                                                                                                                                                                                                                                                                                                                                                                                                                                                                                                                                                                                                                                                                                                                                                                                                                                                                                                                                                                                                                                                                                                                                                                                                                                                                                                                                                                                                              |  |                |   |               |      |            |               |       |              |               |      |            |               |       |             |          |      |  |  |                         |  |               |     |    |               |     |    |               |     |    |               |     |    |          |     |    |  |         |  |               |        |             |               |        |              |               |        |            |               |        |              |          |       |  |  |                |   |               |       |              |               |       |              |               |      |              |               |       |              |          |      |  |  |                         |  |               |       |             |               |       |             |               |       |             |               |       |             |          |       |  |
| <i>IVVTE3</i>                                                                                                                                                  | 43%                                                                                                                                                                                                                                                                                                                                                                                                                                                                                                                                                                                                                                                                                                                                                                                                                                                                                                                                                                                                                                                                                                                                                                                                                                                                                                                                                                                                                                                                                                                                                                                                                                                                                                                                                                                                                                                                                                                                                                                                                                                                                                                                                                                                                                                                                                                                                                                                                                                                                                                                                                                                                                                                                                      | NR                                                                                                                                                                                                                                                                                                                                                                                                                                                                                                                   |                                                                                                                                                                                                                                                                                                                                                                                                                                                                                                                                                                                                                                                                                                                                                                                                                                                                                                                                                                                                                                                                                                                                                                                                                                                                                                                                                                                                                                                                                                                                                                                                                                                                                                                                                                                                                                                                                                                                                                                                                                                                                                                                                                                                                                                              |  |                |   |               |      |            |               |       |              |               |      |            |               |       |             |          |      |  |  |                         |  |               |     |    |               |     |    |               |     |    |               |     |    |          |     |    |  |         |  |               |        |             |               |        |              |               |        |            |               |        |              |          |       |  |  |                |   |               |       |              |               |       |              |               |      |              |               |       |              |          |      |  |  |                         |  |               |       |             |               |       |             |               |       |             |               |       |             |          |       |  |
| <i>IVVTE3</i>                                                                                                                                                  | 58%                                                                                                                                                                                                                                                                                                                                                                                                                                                                                                                                                                                                                                                                                                                                                                                                                                                                                                                                                                                                                                                                                                                                                                                                                                                                                                                                                                                                                                                                                                                                                                                                                                                                                                                                                                                                                                                                                                                                                                                                                                                                                                                                                                                                                                                                                                                                                                                                                                                                                                                                                                                                                                                                                                      | NR                                                                                                                                                                                                                                                                                                                                                                                                                                                                                                                   |                                                                                                                                                                                                                                                                                                                                                                                                                                                                                                                                                                                                                                                                                                                                                                                                                                                                                                                                                                                                                                                                                                                                                                                                                                                                                                                                                                                                                                                                                                                                                                                                                                                                                                                                                                                                                                                                                                                                                                                                                                                                                                                                                                                                                                                              |  |                |   |               |      |            |               |       |              |               |      |            |               |       |             |          |      |  |  |                         |  |               |     |    |               |     |    |               |     |    |               |     |    |          |     |    |  |         |  |               |        |             |               |        |              |               |        |            |               |        |              |          |       |  |  |                |   |               |       |              |               |       |              |               |      |              |               |       |              |          |      |  |  |                         |  |               |       |             |               |       |             |               |       |             |               |       |             |          |       |  |
| <i>L</i>                                                                                                                                                       | 32%                                                                                                                                                                                                                                                                                                                                                                                                                                                                                                                                                                                                                                                                                                                                                                                                                                                                                                                                                                                                                                                                                                                                                                                                                                                                                                                                                                                                                                                                                                                                                                                                                                                                                                                                                                                                                                                                                                                                                                                                                                                                                                                                                                                                                                                                                                                                                                                                                                                                                                                                                                                                                                                                                                      | NR                                                                                                                                                                                                                                                                                                                                                                                                                                                                                                                   |                                                                                                                                                                                                                                                                                                                                                                                                                                                                                                                                                                                                                                                                                                                                                                                                                                                                                                                                                                                                                                                                                                                                                                                                                                                                                                                                                                                                                                                                                                                                                                                                                                                                                                                                                                                                                                                                                                                                                                                                                                                                                                                                                                                                                                                              |  |                |   |               |      |            |               |       |              |               |      |            |               |       |             |          |      |  |  |                         |  |               |     |    |               |     |    |               |     |    |               |     |    |          |     |    |  |         |  |               |        |             |               |        |              |               |        |            |               |        |              |          |       |  |  |                |   |               |       |              |               |       |              |               |      |              |               |       |              |          |      |  |  |                         |  |               |       |             |               |       |             |               |       |             |               |       |             |          |       |  |
|                                                                                                                                                                | CMT(um)                                                                                                                                                                                                                                                                                                                                                                                                                                                                                                                                                                                                                                                                                                                                                                                                                                                                                                                                                                                                                                                                                                                                                                                                                                                                                                                                                                                                                                                                                                                                                                                                                                                                                                                                                                                                                                                                                                                                                                                                                                                                                                                                                                                                                                                                                                                                                                                                                                                                                                                                                                                                                                                                                                  |                                                                                                                                                                                                                                                                                                                                                                                                                                                                                                                      |                                                                                                                                                                                                                                                                                                                                                                                                                                                                                                                                                                                                                                                                                                                                                                                                                                                                                                                                                                                                                                                                                                                                                                                                                                                                                                                                                                                                                                                                                                                                                                                                                                                                                                                                                                                                                                                                                                                                                                                                                                                                                                                                                                                                                                                              |  |                |   |               |      |            |               |       |              |               |      |            |               |       |             |          |      |  |  |                         |  |               |     |    |               |     |    |               |     |    |               |     |    |          |     |    |  |         |  |               |        |             |               |        |              |               |        |            |               |        |              |          |       |  |  |                |   |               |       |              |               |       |              |               |      |              |               |       |              |          |      |  |  |                         |  |               |       |             |               |       |             |               |       |             |               |       |             |          |       |  |
| <i>IVVTE1</i>                                                                                                                                                  | -144.6                                                                                                                                                                                                                                                                                                                                                                                                                                                                                                                                                                                                                                                                                                                                                                                                                                                                                                                                                                                                                                                                                                                                                                                                                                                                                                                                                                                                                                                                                                                                                                                                                                                                                                                                                                                                                                                                                                                                                                                                                                                                                                                                                                                                                                                                                                                                                                                                                                                                                                                                                                                                                                                                                                   | 0.0002 vs L                                                                                                                                                                                                                                                                                                                                                                                                                                                                                                          |                                                                                                                                                                                                                                                                                                                                                                                                                                                                                                                                                                                                                                                                                                                                                                                                                                                                                                                                                                                                                                                                                                                                                                                                                                                                                                                                                                                                                                                                                                                                                                                                                                                                                                                                                                                                                                                                                                                                                                                                                                                                                                                                                                                                                                                              |  |                |   |               |      |            |               |       |              |               |      |            |               |       |             |          |      |  |  |                         |  |               |     |    |               |     |    |               |     |    |               |     |    |          |     |    |  |         |  |               |        |             |               |        |              |               |        |            |               |        |              |          |       |  |  |                |   |               |       |              |               |       |              |               |      |              |               |       |              |          |      |  |  |                         |  |               |       |             |               |       |             |               |       |             |               |       |             |          |       |  |
| <i>IVVTE2</i>                                                                                                                                                  | -194.5                                                                                                                                                                                                                                                                                                                                                                                                                                                                                                                                                                                                                                                                                                                                                                                                                                                                                                                                                                                                                                                                                                                                                                                                                                                                                                                                                                                                                                                                                                                                                                                                                                                                                                                                                                                                                                                                                                                                                                                                                                                                                                                                                                                                                                                                                                                                                                                                                                                                                                                                                                                                                                                                                                   | <0.0001 vs L                                                                                                                                                                                                                                                                                                                                                                                                                                                                                                         |                                                                                                                                                                                                                                                                                                                                                                                                                                                                                                                                                                                                                                                                                                                                                                                                                                                                                                                                                                                                                                                                                                                                                                                                                                                                                                                                                                                                                                                                                                                                                                                                                                                                                                                                                                                                                                                                                                                                                                                                                                                                                                                                                                                                                                                              |  |                |   |               |      |            |               |       |              |               |      |            |               |       |             |          |      |  |  |                         |  |               |     |    |               |     |    |               |     |    |               |     |    |          |     |    |  |         |  |               |        |             |               |        |              |               |        |            |               |        |              |          |       |  |  |                |   |               |       |              |               |       |              |               |      |              |               |       |              |          |      |  |  |                         |  |               |       |             |               |       |             |               |       |             |               |       |             |          |       |  |
| <i>IVVTE3</i>                                                                                                                                                  | -127.3                                                                                                                                                                                                                                                                                                                                                                                                                                                                                                                                                                                                                                                                                                                                                                                                                                                                                                                                                                                                                                                                                                                                                                                                                                                                                                                                                                                                                                                                                                                                                                                                                                                                                                                                                                                                                                                                                                                                                                                                                                                                                                                                                                                                                                                                                                                                                                                                                                                                                                                                                                                                                                                                                                   | 0.007 vs L                                                                                                                                                                                                                                                                                                                                                                                                                                                                                                           |                                                                                                                                                                                                                                                                                                                                                                                                                                                                                                                                                                                                                                                                                                                                                                                                                                                                                                                                                                                                                                                                                                                                                                                                                                                                                                                                                                                                                                                                                                                                                                                                                                                                                                                                                                                                                                                                                                                                                                                                                                                                                                                                                                                                                                                              |  |                |   |               |      |            |               |       |              |               |      |            |               |       |             |          |      |  |  |                         |  |               |     |    |               |     |    |               |     |    |               |     |    |          |     |    |  |         |  |               |        |             |               |        |              |               |        |            |               |        |              |          |       |  |  |                |   |               |       |              |               |       |              |               |      |              |               |       |              |          |      |  |  |                         |  |               |       |             |               |       |             |               |       |             |               |       |             |          |       |  |
| <i>IVVTE3</i>                                                                                                                                                  | -153.3                                                                                                                                                                                                                                                                                                                                                                                                                                                                                                                                                                                                                                                                                                                                                                                                                                                                                                                                                                                                                                                                                                                                                                                                                                                                                                                                                                                                                                                                                                                                                                                                                                                                                                                                                                                                                                                                                                                                                                                                                                                                                                                                                                                                                                                                                                                                                                                                                                                                                                                                                                                                                                                                                                   | <0.0001 vs L                                                                                                                                                                                                                                                                                                                                                                                                                                                                                                         |                                                                                                                                                                                                                                                                                                                                                                                                                                                                                                                                                                                                                                                                                                                                                                                                                                                                                                                                                                                                                                                                                                                                                                                                                                                                                                                                                                                                                                                                                                                                                                                                                                                                                                                                                                                                                                                                                                                                                                                                                                                                                                                                                                                                                                                              |  |                |   |               |      |            |               |       |              |               |      |            |               |       |             |          |      |  |  |                         |  |               |     |    |               |     |    |               |     |    |               |     |    |          |     |    |  |         |  |               |        |             |               |        |              |               |        |            |               |        |              |          |       |  |  |                |   |               |       |              |               |       |              |               |      |              |               |       |              |          |      |  |  |                         |  |               |       |             |               |       |             |               |       |             |               |       |             |          |       |  |
| <i>L</i>                                                                                                                                                       | -67.9                                                                                                                                                                                                                                                                                                                                                                                                                                                                                                                                                                                                                                                                                                                                                                                                                                                                                                                                                                                                                                                                                                                                                                                                                                                                                                                                                                                                                                                                                                                                                                                                                                                                                                                                                                                                                                                                                                                                                                                                                                                                                                                                                                                                                                                                                                                                                                                                                                                                                                                                                                                                                                                                                                    |                                                                                                                                                                                                                                                                                                                                                                                                                                                                                                                      |                                                                                                                                                                                                                                                                                                                                                                                                                                                                                                                                                                                                                                                                                                                                                                                                                                                                                                                                                                                                                                                                                                                                                                                                                                                                                                                                                                                                                                                                                                                                                                                                                                                                                                                                                                                                                                                                                                                                                                                                                                                                                                                                                                                                                                                              |  |                |   |               |      |            |               |       |              |               |      |            |               |       |             |          |      |  |  |                         |  |               |     |    |               |     |    |               |     |    |               |     |    |          |     |    |  |         |  |               |        |             |               |        |              |               |        |            |               |        |              |          |       |  |  |                |   |               |       |              |               |       |              |               |      |              |               |       |              |          |      |  |  |                         |  |               |       |             |               |       |             |               |       |             |               |       |             |          |       |  |
|                                                                                                                                                                | BCVA (letters)                                                                                                                                                                                                                                                                                                                                                                                                                                                                                                                                                                                                                                                                                                                                                                                                                                                                                                                                                                                                                                                                                                                                                                                                                                                                                                                                                                                                                                                                                                                                                                                                                                                                                                                                                                                                                                                                                                                                                                                                                                                                                                                                                                                                                                                                                                                                                                                                                                                                                                                                                                                                                                                                                           | p                                                                                                                                                                                                                                                                                                                                                                                                                                                                                                                    |                                                                                                                                                                                                                                                                                                                                                                                                                                                                                                                                                                                                                                                                                                                                                                                                                                                                                                                                                                                                                                                                                                                                                                                                                                                                                                                                                                                                                                                                                                                                                                                                                                                                                                                                                                                                                                                                                                                                                                                                                                                                                                                                                                                                                                                              |  |                |   |               |      |            |               |       |              |               |      |            |               |       |             |          |      |  |  |                         |  |               |     |    |               |     |    |               |     |    |               |     |    |          |     |    |  |         |  |               |        |             |               |        |              |               |        |            |               |        |              |          |       |  |  |                |   |               |       |              |               |       |              |               |      |              |               |       |              |          |      |  |  |                         |  |               |       |             |               |       |             |               |       |             |               |       |             |          |       |  |
| <i>IVVTE1</i>                                                                                                                                                  | +11.0                                                                                                                                                                                                                                                                                                                                                                                                                                                                                                                                                                                                                                                                                                                                                                                                                                                                                                                                                                                                                                                                                                                                                                                                                                                                                                                                                                                                                                                                                                                                                                                                                                                                                                                                                                                                                                                                                                                                                                                                                                                                                                                                                                                                                                                                                                                                                                                                                                                                                                                                                                                                                                                                                                    | ≤0.0001 vs L                                                                                                                                                                                                                                                                                                                                                                                                                                                                                                         |                                                                                                                                                                                                                                                                                                                                                                                                                                                                                                                                                                                                                                                                                                                                                                                                                                                                                                                                                                                                                                                                                                                                                                                                                                                                                                                                                                                                                                                                                                                                                                                                                                                                                                                                                                                                                                                                                                                                                                                                                                                                                                                                                                                                                                                              |  |                |   |               |      |            |               |       |              |               |      |            |               |       |             |          |      |  |  |                         |  |               |     |    |               |     |    |               |     |    |               |     |    |          |     |    |  |         |  |               |        |             |               |        |              |               |        |            |               |        |              |          |       |  |  |                |   |               |       |              |               |       |              |               |      |              |               |       |              |          |      |  |  |                         |  |               |       |             |               |       |             |               |       |             |               |       |             |          |       |  |
| <i>IVVTE2</i>                                                                                                                                                  | +13.1                                                                                                                                                                                                                                                                                                                                                                                                                                                                                                                                                                                                                                                                                                                                                                                                                                                                                                                                                                                                                                                                                                                                                                                                                                                                                                                                                                                                                                                                                                                                                                                                                                                                                                                                                                                                                                                                                                                                                                                                                                                                                                                                                                                                                                                                                                                                                                                                                                                                                                                                                                                                                                                                                                    | ≤0.0001 vs L                                                                                                                                                                                                                                                                                                                                                                                                                                                                                                         |                                                                                                                                                                                                                                                                                                                                                                                                                                                                                                                                                                                                                                                                                                                                                                                                                                                                                                                                                                                                                                                                                                                                                                                                                                                                                                                                                                                                                                                                                                                                                                                                                                                                                                                                                                                                                                                                                                                                                                                                                                                                                                                                                                                                                                                              |  |                |   |               |      |            |               |       |              |               |      |            |               |       |             |          |      |  |  |                         |  |               |     |    |               |     |    |               |     |    |               |     |    |          |     |    |  |         |  |               |        |             |               |        |              |               |        |            |               |        |              |          |       |  |  |                |   |               |       |              |               |       |              |               |      |              |               |       |              |          |      |  |  |                         |  |               |       |             |               |       |             |               |       |             |               |       |             |          |       |  |
| <i>IVVTE3</i>                                                                                                                                                  | +9.7                                                                                                                                                                                                                                                                                                                                                                                                                                                                                                                                                                                                                                                                                                                                                                                                                                                                                                                                                                                                                                                                                                                                                                                                                                                                                                                                                                                                                                                                                                                                                                                                                                                                                                                                                                                                                                                                                                                                                                                                                                                                                                                                                                                                                                                                                                                                                                                                                                                                                                                                                                                                                                                                                                     | ≤0.0001 vs L                                                                                                                                                                                                                                                                                                                                                                                                                                                                                                         |                                                                                                                                                                                                                                                                                                                                                                                                                                                                                                                                                                                                                                                                                                                                                                                                                                                                                                                                                                                                                                                                                                                                                                                                                                                                                                                                                                                                                                                                                                                                                                                                                                                                                                                                                                                                                                                                                                                                                                                                                                                                                                                                                                                                                                                              |  |                |   |               |      |            |               |       |              |               |      |            |               |       |             |          |      |  |  |                         |  |               |     |    |               |     |    |               |     |    |               |     |    |          |     |    |  |         |  |               |        |             |               |        |              |               |        |            |               |        |              |          |       |  |  |                |   |               |       |              |               |       |              |               |      |              |               |       |              |          |      |  |  |                         |  |               |       |             |               |       |             |               |       |             |               |       |             |          |       |  |
| <i>IVVTE3</i>                                                                                                                                                  | +12.0                                                                                                                                                                                                                                                                                                                                                                                                                                                                                                                                                                                                                                                                                                                                                                                                                                                                                                                                                                                                                                                                                                                                                                                                                                                                                                                                                                                                                                                                                                                                                                                                                                                                                                                                                                                                                                                                                                                                                                                                                                                                                                                                                                                                                                                                                                                                                                                                                                                                                                                                                                                                                                                                                                    | ≤0.0001 vs L                                                                                                                                                                                                                                                                                                                                                                                                                                                                                                         |                                                                                                                                                                                                                                                                                                                                                                                                                                                                                                                                                                                                                                                                                                                                                                                                                                                                                                                                                                                                                                                                                                                                                                                                                                                                                                                                                                                                                                                                                                                                                                                                                                                                                                                                                                                                                                                                                                                                                                                                                                                                                                                                                                                                                                                              |  |                |   |               |      |            |               |       |              |               |      |            |               |       |             |          |      |  |  |                         |  |               |     |    |               |     |    |               |     |    |               |     |    |          |     |    |  |         |  |               |        |             |               |        |              |               |        |            |               |        |              |          |       |  |  |                |   |               |       |              |               |       |              |               |      |              |               |       |              |          |      |  |  |                         |  |               |       |             |               |       |             |               |       |             |               |       |             |          |       |  |
| <i>L</i>                                                                                                                                                       | -1.3                                                                                                                                                                                                                                                                                                                                                                                                                                                                                                                                                                                                                                                                                                                                                                                                                                                                                                                                                                                                                                                                                                                                                                                                                                                                                                                                                                                                                                                                                                                                                                                                                                                                                                                                                                                                                                                                                                                                                                                                                                                                                                                                                                                                                                                                                                                                                                                                                                                                                                                                                                                                                                                                                                     |                                                                                                                                                                                                                                                                                                                                                                                                                                                                                                                      |                                                                                                                                                                                                                                                                                                                                                                                                                                                                                                                                                                                                                                                                                                                                                                                                                                                                                                                                                                                                                                                                                                                                                                                                                                                                                                                                                                                                                                                                                                                                                                                                                                                                                                                                                                                                                                                                                                                                                                                                                                                                                                                                                                                                                                                              |  |                |   |               |      |            |               |       |              |               |      |            |               |       |             |          |      |  |  |                         |  |               |     |    |               |     |    |               |     |    |               |     |    |          |     |    |  |         |  |               |        |             |               |        |              |               |        |            |               |        |              |          |       |  |  |                |   |               |       |              |               |       |              |               |      |              |               |       |              |          |      |  |  |                         |  |               |       |             |               |       |             |               |       |             |               |       |             |          |       |  |
|                                                                                                                                                                | <b>plus ≥15 letters</b>                                                                                                                                                                                                                                                                                                                                                                                                                                                                                                                                                                                                                                                                                                                                                                                                                                                                                                                                                                                                                                                                                                                                                                                                                                                                                                                                                                                                                                                                                                                                                                                                                                                                                                                                                                                                                                                                                                                                                                                                                                                                                                                                                                                                                                                                                                                                                                                                                                                                                                                                                                                                                                                                                  |                                                                                                                                                                                                                                                                                                                                                                                                                                                                                                                      |                                                                                                                                                                                                                                                                                                                                                                                                                                                                                                                                                                                                                                                                                                                                                                                                                                                                                                                                                                                                                                                                                                                                                                                                                                                                                                                                                                                                                                                                                                                                                                                                                                                                                                                                                                                                                                                                                                                                                                                                                                                                                                                                                                                                                                                              |  |                |   |               |      |            |               |       |              |               |      |            |               |       |             |          |      |  |  |                         |  |               |     |    |               |     |    |               |     |    |               |     |    |          |     |    |  |         |  |               |        |             |               |        |              |               |        |            |               |        |              |          |       |  |  |                |   |               |       |              |               |       |              |               |      |              |               |       |              |          |      |  |  |                         |  |               |       |             |               |       |             |               |       |             |               |       |             |          |       |  |
| <i>IVVTE1</i>                                                                                                                                                  | 40.9%                                                                                                                                                                                                                                                                                                                                                                                                                                                                                                                                                                                                                                                                                                                                                                                                                                                                                                                                                                                                                                                                                                                                                                                                                                                                                                                                                                                                                                                                                                                                                                                                                                                                                                                                                                                                                                                                                                                                                                                                                                                                                                                                                                                                                                                                                                                                                                                                                                                                                                                                                                                                                                                                                                    | 0.0031 vs L                                                                                                                                                                                                                                                                                                                                                                                                                                                                                                          |                                                                                                                                                                                                                                                                                                                                                                                                                                                                                                                                                                                                                                                                                                                                                                                                                                                                                                                                                                                                                                                                                                                                                                                                                                                                                                                                                                                                                                                                                                                                                                                                                                                                                                                                                                                                                                                                                                                                                                                                                                                                                                                                                                                                                                                              |  |                |   |               |      |            |               |       |              |               |      |            |               |       |             |          |      |  |  |                         |  |               |     |    |               |     |    |               |     |    |               |     |    |          |     |    |  |         |  |               |        |             |               |        |              |               |        |            |               |        |              |          |       |  |  |                |   |               |       |              |               |       |              |               |      |              |               |       |              |          |      |  |  |                         |  |               |       |             |               |       |             |               |       |             |               |       |             |          |       |  |
| <i>IVVTE2</i>                                                                                                                                                  | 45.5%                                                                                                                                                                                                                                                                                                                                                                                                                                                                                                                                                                                                                                                                                                                                                                                                                                                                                                                                                                                                                                                                                                                                                                                                                                                                                                                                                                                                                                                                                                                                                                                                                                                                                                                                                                                                                                                                                                                                                                                                                                                                                                                                                                                                                                                                                                                                                                                                                                                                                                                                                                                                                                                                                                    | 0.0007 vs L                                                                                                                                                                                                                                                                                                                                                                                                                                                                                                          |                                                                                                                                                                                                                                                                                                                                                                                                                                                                                                                                                                                                                                                                                                                                                                                                                                                                                                                                                                                                                                                                                                                                                                                                                                                                                                                                                                                                                                                                                                                                                                                                                                                                                                                                                                                                                                                                                                                                                                                                                                                                                                                                                                                                                                                              |  |                |   |               |      |            |               |       |              |               |      |            |               |       |             |          |      |  |  |                         |  |               |     |    |               |     |    |               |     |    |               |     |    |          |     |    |  |         |  |               |        |             |               |        |              |               |        |            |               |        |              |          |       |  |  |                |   |               |       |              |               |       |              |               |      |              |               |       |              |          |      |  |  |                         |  |               |       |             |               |       |             |               |       |             |               |       |             |          |       |  |
| <i>IVVTE3</i>                                                                                                                                                  | 23.8%                                                                                                                                                                                                                                                                                                                                                                                                                                                                                                                                                                                                                                                                                                                                                                                                                                                                                                                                                                                                                                                                                                                                                                                                                                                                                                                                                                                                                                                                                                                                                                                                                                                                                                                                                                                                                                                                                                                                                                                                                                                                                                                                                                                                                                                                                                                                                                                                                                                                                                                                                                                                                                                                                                    | 0.1608 vs L                                                                                                                                                                                                                                                                                                                                                                                                                                                                                                          |                                                                                                                                                                                                                                                                                                                                                                                                                                                                                                                                                                                                                                                                                                                                                                                                                                                                                                                                                                                                                                                                                                                                                                                                                                                                                                                                                                                                                                                                                                                                                                                                                                                                                                                                                                                                                                                                                                                                                                                                                                                                                                                                                                                                                                                              |  |                |   |               |      |            |               |       |              |               |      |            |               |       |             |          |      |  |  |                         |  |               |     |    |               |     |    |               |     |    |               |     |    |          |     |    |  |         |  |               |        |             |               |        |              |               |        |            |               |        |              |          |       |  |  |                |   |               |       |              |               |       |              |               |      |              |               |       |              |          |      |  |  |                         |  |               |       |             |               |       |             |               |       |             |               |       |             |          |       |  |
| <i>IVVTE3</i>                                                                                                                                                  | 42.2%                                                                                                                                                                                                                                                                                                                                                                                                                                                                                                                                                                                                                                                                                                                                                                                                                                                                                                                                                                                                                                                                                                                                                                                                                                                                                                                                                                                                                                                                                                                                                                                                                                                                                                                                                                                                                                                                                                                                                                                                                                                                                                                                                                                                                                                                                                                                                                                                                                                                                                                                                                                                                                                                                                    | 0.0016 vs L                                                                                                                                                                                                                                                                                                                                                                                                                                                                                                          |                                                                                                                                                                                                                                                                                                                                                                                                                                                                                                                                                                                                                                                                                                                                                                                                                                                                                                                                                                                                                                                                                                                                                                                                                                                                                                                                                                                                                                                                                                                                                                                                                                                                                                                                                                                                                                                                                                                                                                                                                                                                                                                                                                                                                                                              |  |                |   |               |      |            |               |       |              |               |      |            |               |       |             |          |      |  |  |                         |  |               |     |    |               |     |    |               |     |    |               |     |    |          |     |    |  |         |  |               |        |             |               |        |              |               |        |            |               |        |              |          |       |  |  |                |   |               |       |              |               |       |              |               |      |              |               |       |              |          |      |  |  |                         |  |               |       |             |               |       |             |               |       |             |               |       |             |          |       |  |
| <i>L</i>                                                                                                                                                       | 11.4%                                                                                                                                                                                                                                                                                                                                                                                                                                                                                                                                                                                                                                                                                                                                                                                                                                                                                                                                                                                                                                                                                                                                                                                                                                                                                                                                                                                                                                                                                                                                                                                                                                                                                                                                                                                                                                                                                                                                                                                                                                                                                                                                                                                                                                                                                                                                                                                                                                                                                                                                                                                                                                                                                                    |                                                                                                                                                                                                                                                                                                                                                                                                                                                                                                                      |                                                                                                                                                                                                                                                                                                                                                                                                                                                                                                                                                                                                                                                                                                                                                                                                                                                                                                                                                                                                                                                                                                                                                                                                                                                                                                                                                                                                                                                                                                                                                                                                                                                                                                                                                                                                                                                                                                                                                                                                                                                                                                                                                                                                                                                              |  |                |   |               |      |            |               |       |              |               |      |            |               |       |             |          |      |  |  |                         |  |               |     |    |               |     |    |               |     |    |               |     |    |          |     |    |  |         |  |               |        |             |               |        |              |               |        |            |               |        |              |          |       |  |  |                |   |               |       |              |               |       |              |               |      |              |               |       |              |          |      |  |  |                         |  |               |       |             |               |       |             |               |       |             |               |       |             |          |       |  |

1  
2  
3  
4  
5  
6  
7  
8  
9  
10  
11  
12  
13  
14  
15  
16  
17  
18  
19  
20  
21  
22  
23  
24  
25  
26  
27  
28  
29  
30  
31  
32  
33  
34  
35  
36  
37  
38  
39  
40  
41  
42  
43  
44  
45  
46  
47  
48  
49

| Study | Participants and baseline values | Intervention | Outcome (change from baseline at study end) |                      |
|-------|----------------------------------|--------------|---------------------------------------------|----------------------|
|       |                                  |              | <b>plus ≥10 letters</b>                     |                      |
|       |                                  |              | <i>IVVTE1</i>                               | 57% 0.0031 vs L      |
|       |                                  |              | <i>IVVTE2</i>                               | 71% 0.0007 vs L      |
|       |                                  |              | <i>IVVTE3</i>                               | 45% 0.1608 vs L      |
|       |                                  |              | <i>IVVTE3</i>                               | 62% 0.0016 vs L      |
|       |                                  |              | <b>L</b>                                    |                      |
|       |                                  |              | <b>CMT(μm)</b>                              |                      |
|       |                                  |              | <i>IVVTE1</i>                               | -165.4 < 0.0001 vs L |
|       |                                  |              | <i>IVVTE2</i>                               | -227.4 < 0.0001 vs L |
|       |                                  |              | <i>IVVTE3</i>                               | -187.8 < 0.0001 vs L |
|       |                                  |              | <i>IVVTE3</i>                               | -180.3 < 0.0001 vs L |
|       |                                  |              | <b>L</b>                                    |                      |
|       |                                  |              |                                             | -58.4                |

Abbreviations: See table 2

For peer review only



Table 6: Dexamethasone and fluocinolone studies

| Study                                                                                                                                                                                                          | Participants and baseline values                                                                                                                                                                                                                                                                                                                                                                                                                                                                                                                                                                                                                                                                                                                                                                                                                                                                                                                                                                                                                                                                         | Intervention                                                                                                                                                                                                                                                                                                                                                                                                                                                                                                                                                                                                                                                         | Outcome (change from baseline at study end)                                                                                                                                                                                                                                                                                                                                                                                                                                                                                                                                                                                                                                                                                                                                                                                                                                                                                                                                                                                                                                                                                                                                                                                          |  |                        |   |               |             |         |               |     |            |          |     |  |  |                       |   |               |                |                      |               |                  |                |          |                |  |  |                        |   |               |             |         |               |             |         |          |             |  |
|----------------------------------------------------------------------------------------------------------------------------------------------------------------------------------------------------------------|----------------------------------------------------------------------------------------------------------------------------------------------------------------------------------------------------------------------------------------------------------------------------------------------------------------------------------------------------------------------------------------------------------------------------------------------------------------------------------------------------------------------------------------------------------------------------------------------------------------------------------------------------------------------------------------------------------------------------------------------------------------------------------------------------------------------------------------------------------------------------------------------------------------------------------------------------------------------------------------------------------------------------------------------------------------------------------------------------------|----------------------------------------------------------------------------------------------------------------------------------------------------------------------------------------------------------------------------------------------------------------------------------------------------------------------------------------------------------------------------------------------------------------------------------------------------------------------------------------------------------------------------------------------------------------------------------------------------------------------------------------------------------------------|--------------------------------------------------------------------------------------------------------------------------------------------------------------------------------------------------------------------------------------------------------------------------------------------------------------------------------------------------------------------------------------------------------------------------------------------------------------------------------------------------------------------------------------------------------------------------------------------------------------------------------------------------------------------------------------------------------------------------------------------------------------------------------------------------------------------------------------------------------------------------------------------------------------------------------------------------------------------------------------------------------------------------------------------------------------------------------------------------------------------------------------------------------------------------------------------------------------------------------------|--|------------------------|---|---------------|-------------|---------|---------------|-----|------------|----------|-----|--|--|-----------------------|---|---------------|----------------|----------------------|---------------|------------------|----------------|----------|----------------|--|--|------------------------|---|---------------|-------------|---------|---------------|-------------|---------|----------|-------------|--|
| <i>Dexamethasone</i>                                                                                                                                                                                           |                                                                                                                                                                                                                                                                                                                                                                                                                                                                                                                                                                                                                                                                                                                                                                                                                                                                                                                                                                                                                                                                                                          |                                                                                                                                                                                                                                                                                                                                                                                                                                                                                                                                                                                                                                                                      |                                                                                                                                                                                                                                                                                                                                                                                                                                                                                                                                                                                                                                                                                                                                                                                                                                                                                                                                                                                                                                                                                                                                                                                                                                      |  |                        |   |               |             |         |               |     |            |          |     |  |  |                       |   |               |                |                      |               |                  |                |          |                |  |  |                        |   |               |             |         |               |             |         |          |             |  |
| <p><b>Callanan 2011</b>USA[44]<br/> <b>Design:</b> 2-arm RCT<br/> <b>Follow-up:</b> 12 months</p>                                                                                                              | <p>N: 253 eyes of 253 patients<br/> <b>Inclusion criteria:</b> diffuse DMO, CMT <math>\geq 275</math> <math>\mu\text{m}</math>, BCVA <math>\geq 34</math> and <math>\leq 70</math> letters<br/> <b>Exclusion criteria:</b> not reported<br/> <b>Age:</b> not reported<br/> <b>Sex:</b> not reported<br/> <b>Diabetes type:</b> not reported<br/> <b>HbA1c:</b> not reported<br/> <b>Baseline VA:</b> not reported<br/> <b>Baseline CMT:</b> not reported<br/> <b>Comorbidities:</b> not reported</p>                                                                                                                                                                                                                                                                                                                                                                                                                                                                                                                                                                                                     | <p><b>Group 1 (DIL, n=126 eyes):</b> dexamethasone IV implant followed by laser photocoagulation after 1 month (mean 1.6 implants; 78.6% completion)<br/> <b>Group 2 (L, n=127 eyes):</b> laser alone (79.5% completion)<br/> <b>Regimen for all groups:</b> if needed, patients were retreated with the dexamethasone implant at months 6 or 9, and with laser at months 4, 7, and 10; mean 2.2 laser treatments per patient<br/> <b>Laser protocol</b> not reported</p>                                                                                                                                                                                            | <p><b>At 12 months</b><br/> <b>BCVA:</b></p> <table border="1"> <thead> <tr> <th></th> <th>plus <math>\geq 10</math> letters</th> <th>p</th> </tr> </thead> <tbody> <tr> <td><i>DIL</i></td> <td>28%</td> <td>NS vs L</td> </tr> <tr> <td><i>L</i></td> <td>24%</td> <td></td> </tr> </tbody> </table> <ul style="list-style-type: none"> <li>patients in DIL group had significantly greater increases in BCVA from baseline than patients in the laser group (<math>p &lt; 0.05</math>) at months 1 to 9 only</li> </ul> <p><b>CMT (OCT):</b></p> <ul style="list-style-type: none"> <li>patients in DIL group had significantly greater mean reductions from baseline in CMT at months 1 and 6 only (<math>p &lt; 0.001</math>)</li> </ul>                                                                                                                                                                                                                                                                                                                                                                                                                                                                                        |  | plus $\geq 10$ letters | p | <i>DIL</i>    | 28%         | NS vs L | <i>L</i>      | 24% |            |          |     |  |  |                       |   |               |                |                      |               |                  |                |          |                |  |  |                        |   |               |             |         |               |             |         |          |             |  |
|                                                                                                                                                                                                                | plus $\geq 10$ letters                                                                                                                                                                                                                                                                                                                                                                                                                                                                                                                                                                                                                                                                                                                                                                                                                                                                                                                                                                                                                                                                                   | p                                                                                                                                                                                                                                                                                                                                                                                                                                                                                                                                                                                                                                                                    |                                                                                                                                                                                                                                                                                                                                                                                                                                                                                                                                                                                                                                                                                                                                                                                                                                                                                                                                                                                                                                                                                                                                                                                                                                      |  |                        |   |               |             |         |               |     |            |          |     |  |  |                       |   |               |                |                      |               |                  |                |          |                |  |  |                        |   |               |             |         |               |             |         |          |             |  |
| <i>DIL</i>                                                                                                                                                                                                     | 28%                                                                                                                                                                                                                                                                                                                                                                                                                                                                                                                                                                                                                                                                                                                                                                                                                                                                                                                                                                                                                                                                                                      | NS vs L                                                                                                                                                                                                                                                                                                                                                                                                                                                                                                                                                                                                                                                              |                                                                                                                                                                                                                                                                                                                                                                                                                                                                                                                                                                                                                                                                                                                                                                                                                                                                                                                                                                                                                                                                                                                                                                                                                                      |  |                        |   |               |             |         |               |     |            |          |     |  |  |                       |   |               |                |                      |               |                  |                |          |                |  |  |                        |   |               |             |         |               |             |         |          |             |  |
| <i>L</i>                                                                                                                                                                                                       | 24%                                                                                                                                                                                                                                                                                                                                                                                                                                                                                                                                                                                                                                                                                                                                                                                                                                                                                                                                                                                                                                                                                                      |                                                                                                                                                                                                                                                                                                                                                                                                                                                                                                                                                                                                                                                                      |                                                                                                                                                                                                                                                                                                                                                                                                                                                                                                                                                                                                                                                                                                                                                                                                                                                                                                                                                                                                                                                                                                                                                                                                                                      |  |                        |   |               |             |         |               |     |            |          |     |  |  |                       |   |               |                |                      |               |                  |                |          |                |  |  |                        |   |               |             |         |               |             |         |          |             |  |
| <p><b>Haller 2010</b>[59]<br/>                     USA<br/>                     Multicenter</p> <p><b>Design:</b> 3-arm RCT<br/> <b>Follow-up:</b> 6 months (180 days), primary outcome 3 months (90 days)</p> | <p>N: 171 eyes of 171 patients<br/> <b>Inclusion criteria:</b> <math>\geq 12</math> years, DMO persisting for <math>\geq 90</math> days after laser treatment or medical therapy, BCVA by ETDRS between 20/40 (67 letters) and 20/200 (35 letters) due to clinically detectable DMO; analysis includes only eyes with DMO associated with DR<br/> <b>Exclusion criteria:</b> history of vitrectomy in the study eye; use of systemic, periocular, or intraocular steroids within 30 days of enrollment; moderate or severe glaucoma in the study eye; poorly controlled hypertension (SP <math>&gt; 160</math> mmHg or DP <math>&gt; 90</math> mmHg); poorly controlled diabetes (HbA1c <math>&gt; 13\%</math>)<br/> <b>Age:</b> 62.9 to 63.8 years SD10.2 to 12.0<br/> <b>Sex:</b> 45.6 to 49.1% female<br/> <b>Diabetes type:</b> not reported<br/> <b>HbA1c:</b> 7.3 to 7.6%<br/> <b>Baseline VA:</b> letter score 54.4 to 54.7 SD9.96 to 11.88<br/> <b>Baseline CMT:</b> 417.5 to 446.5 <math>\mu\text{m}</math> SD123.7 to 155.9<br/> <b>Comorbidities:</b> 19 to 21% prior cataract extraction</p> | <p><b>Group 1 (DDS350, n=57 eyes):</b> 350 <math>\mu\text{g}</math> dexamethasone IV drug delivery system, implanted into the vitreous cavity<br/> <b>Group 2 (DDS700, n=57 eyes):</b> 700 <math>\mu\text{g}</math> dexamethasone IV drug delivery system, implanted into the vitreous cavity<br/> <b>Group 3 (C, n=57 eyes):</b> no treatment<br/> <b>Regimen for all groups:</b> eyes demonstrating a VA loss of <math>\geq 5</math> letters could be treated with any other therapy (including laser photocoagulation and IV triamcinolone) (n=4 with photocoagulation or IV triamcinolone in the C group, n=2 in the DDS350 group, none in the DDS700 group)</p> | <p><b>At 90 days</b><br/> <b>BCVA (ETDRS):</b></p> <table border="1"> <thead> <tr> <th></th> <th>plus <math>\geq 10</math> letters</th> <th>p</th> </tr> </thead> <tbody> <tr> <td><i>DDS350</i></td> <td>21% [graph]</td> <td>NS vs C</td> </tr> <tr> <td><i>DDS700</i></td> <td>33%</td> <td>0.007 vs C</td> </tr> <tr> <td><i>C</i></td> <td>12%</td> <td></td> </tr> </tbody> </table> <p><b>CMT (OCT):</b></p> <table border="1"> <thead> <tr> <th></th> <th>CMT (<math>\mu\text{m}</math>)</th> <th>p</th> </tr> </thead> <tbody> <tr> <td><i>DDS350</i></td> <td>-42.57 SD95.96</td> <td>NS (<math>p=0.07</math>) vs C</td> </tr> <tr> <td><i>DDS700</i></td> <td>-132.27 SD160.86</td> <td><math>&lt; 0.001</math> vs C</td> </tr> <tr> <td><i>C</i></td> <td>+30.21 SD82.12</td> <td></td> </tr> </tbody> </table> <p><b>At 180 days</b><br/> <b>BCVA (ETDRS):</b></p> <table border="1"> <thead> <tr> <th></th> <th>plus <math>\geq 10</math> letters</th> <th>p</th> </tr> </thead> <tbody> <tr> <td><i>DDS350</i></td> <td>20% [graph]</td> <td>NS vs C</td> </tr> <tr> <td><i>DDS700</i></td> <td>33% [graph]</td> <td>NS vs C</td> </tr> <tr> <td><i>C</i></td> <td>23% [graph]</td> <td></td> </tr> </tbody> </table> |  | plus $\geq 10$ letters | p | <i>DDS350</i> | 21% [graph] | NS vs C | <i>DDS700</i> | 33% | 0.007 vs C | <i>C</i> | 12% |  |  | CMT ( $\mu\text{m}$ ) | p | <i>DDS350</i> | -42.57 SD95.96 | NS ( $p=0.07$ ) vs C | <i>DDS700</i> | -132.27 SD160.86 | $< 0.001$ vs C | <i>C</i> | +30.21 SD82.12 |  |  | plus $\geq 10$ letters | p | <i>DDS350</i> | 20% [graph] | NS vs C | <i>DDS700</i> | 33% [graph] | NS vs C | <i>C</i> | 23% [graph] |  |
|                                                                                                                                                                                                                | plus $\geq 10$ letters                                                                                                                                                                                                                                                                                                                                                                                                                                                                                                                                                                                                                                                                                                                                                                                                                                                                                                                                                                                                                                                                                   | p                                                                                                                                                                                                                                                                                                                                                                                                                                                                                                                                                                                                                                                                    |                                                                                                                                                                                                                                                                                                                                                                                                                                                                                                                                                                                                                                                                                                                                                                                                                                                                                                                                                                                                                                                                                                                                                                                                                                      |  |                        |   |               |             |         |               |     |            |          |     |  |  |                       |   |               |                |                      |               |                  |                |          |                |  |  |                        |   |               |             |         |               |             |         |          |             |  |
| <i>DDS350</i>                                                                                                                                                                                                  | 21% [graph]                                                                                                                                                                                                                                                                                                                                                                                                                                                                                                                                                                                                                                                                                                                                                                                                                                                                                                                                                                                                                                                                                              | NS vs C                                                                                                                                                                                                                                                                                                                                                                                                                                                                                                                                                                                                                                                              |                                                                                                                                                                                                                                                                                                                                                                                                                                                                                                                                                                                                                                                                                                                                                                                                                                                                                                                                                                                                                                                                                                                                                                                                                                      |  |                        |   |               |             |         |               |     |            |          |     |  |  |                       |   |               |                |                      |               |                  |                |          |                |  |  |                        |   |               |             |         |               |             |         |          |             |  |
| <i>DDS700</i>                                                                                                                                                                                                  | 33%                                                                                                                                                                                                                                                                                                                                                                                                                                                                                                                                                                                                                                                                                                                                                                                                                                                                                                                                                                                                                                                                                                      | 0.007 vs C                                                                                                                                                                                                                                                                                                                                                                                                                                                                                                                                                                                                                                                           |                                                                                                                                                                                                                                                                                                                                                                                                                                                                                                                                                                                                                                                                                                                                                                                                                                                                                                                                                                                                                                                                                                                                                                                                                                      |  |                        |   |               |             |         |               |     |            |          |     |  |  |                       |   |               |                |                      |               |                  |                |          |                |  |  |                        |   |               |             |         |               |             |         |          |             |  |
| <i>C</i>                                                                                                                                                                                                       | 12%                                                                                                                                                                                                                                                                                                                                                                                                                                                                                                                                                                                                                                                                                                                                                                                                                                                                                                                                                                                                                                                                                                      |                                                                                                                                                                                                                                                                                                                                                                                                                                                                                                                                                                                                                                                                      |                                                                                                                                                                                                                                                                                                                                                                                                                                                                                                                                                                                                                                                                                                                                                                                                                                                                                                                                                                                                                                                                                                                                                                                                                                      |  |                        |   |               |             |         |               |     |            |          |     |  |  |                       |   |               |                |                      |               |                  |                |          |                |  |  |                        |   |               |             |         |               |             |         |          |             |  |
|                                                                                                                                                                                                                | CMT ( $\mu\text{m}$ )                                                                                                                                                                                                                                                                                                                                                                                                                                                                                                                                                                                                                                                                                                                                                                                                                                                                                                                                                                                                                                                                                    | p                                                                                                                                                                                                                                                                                                                                                                                                                                                                                                                                                                                                                                                                    |                                                                                                                                                                                                                                                                                                                                                                                                                                                                                                                                                                                                                                                                                                                                                                                                                                                                                                                                                                                                                                                                                                                                                                                                                                      |  |                        |   |               |             |         |               |     |            |          |     |  |  |                       |   |               |                |                      |               |                  |                |          |                |  |  |                        |   |               |             |         |               |             |         |          |             |  |
| <i>DDS350</i>                                                                                                                                                                                                  | -42.57 SD95.96                                                                                                                                                                                                                                                                                                                                                                                                                                                                                                                                                                                                                                                                                                                                                                                                                                                                                                                                                                                                                                                                                           | NS ( $p=0.07$ ) vs C                                                                                                                                                                                                                                                                                                                                                                                                                                                                                                                                                                                                                                                 |                                                                                                                                                                                                                                                                                                                                                                                                                                                                                                                                                                                                                                                                                                                                                                                                                                                                                                                                                                                                                                                                                                                                                                                                                                      |  |                        |   |               |             |         |               |     |            |          |     |  |  |                       |   |               |                |                      |               |                  |                |          |                |  |  |                        |   |               |             |         |               |             |         |          |             |  |
| <i>DDS700</i>                                                                                                                                                                                                  | -132.27 SD160.86                                                                                                                                                                                                                                                                                                                                                                                                                                                                                                                                                                                                                                                                                                                                                                                                                                                                                                                                                                                                                                                                                         | $< 0.001$ vs C                                                                                                                                                                                                                                                                                                                                                                                                                                                                                                                                                                                                                                                       |                                                                                                                                                                                                                                                                                                                                                                                                                                                                                                                                                                                                                                                                                                                                                                                                                                                                                                                                                                                                                                                                                                                                                                                                                                      |  |                        |   |               |             |         |               |     |            |          |     |  |  |                       |   |               |                |                      |               |                  |                |          |                |  |  |                        |   |               |             |         |               |             |         |          |             |  |
| <i>C</i>                                                                                                                                                                                                       | +30.21 SD82.12                                                                                                                                                                                                                                                                                                                                                                                                                                                                                                                                                                                                                                                                                                                                                                                                                                                                                                                                                                                                                                                                                           |                                                                                                                                                                                                                                                                                                                                                                                                                                                                                                                                                                                                                                                                      |                                                                                                                                                                                                                                                                                                                                                                                                                                                                                                                                                                                                                                                                                                                                                                                                                                                                                                                                                                                                                                                                                                                                                                                                                                      |  |                        |   |               |             |         |               |     |            |          |     |  |  |                       |   |               |                |                      |               |                  |                |          |                |  |  |                        |   |               |             |         |               |             |         |          |             |  |
|                                                                                                                                                                                                                | plus $\geq 10$ letters                                                                                                                                                                                                                                                                                                                                                                                                                                                                                                                                                                                                                                                                                                                                                                                                                                                                                                                                                                                                                                                                                   | p                                                                                                                                                                                                                                                                                                                                                                                                                                                                                                                                                                                                                                                                    |                                                                                                                                                                                                                                                                                                                                                                                                                                                                                                                                                                                                                                                                                                                                                                                                                                                                                                                                                                                                                                                                                                                                                                                                                                      |  |                        |   |               |             |         |               |     |            |          |     |  |  |                       |   |               |                |                      |               |                  |                |          |                |  |  |                        |   |               |             |         |               |             |         |          |             |  |
| <i>DDS350</i>                                                                                                                                                                                                  | 20% [graph]                                                                                                                                                                                                                                                                                                                                                                                                                                                                                                                                                                                                                                                                                                                                                                                                                                                                                                                                                                                                                                                                                              | NS vs C                                                                                                                                                                                                                                                                                                                                                                                                                                                                                                                                                                                                                                                              |                                                                                                                                                                                                                                                                                                                                                                                                                                                                                                                                                                                                                                                                                                                                                                                                                                                                                                                                                                                                                                                                                                                                                                                                                                      |  |                        |   |               |             |         |               |     |            |          |     |  |  |                       |   |               |                |                      |               |                  |                |          |                |  |  |                        |   |               |             |         |               |             |         |          |             |  |
| <i>DDS700</i>                                                                                                                                                                                                  | 33% [graph]                                                                                                                                                                                                                                                                                                                                                                                                                                                                                                                                                                                                                                                                                                                                                                                                                                                                                                                                                                                                                                                                                              | NS vs C                                                                                                                                                                                                                                                                                                                                                                                                                                                                                                                                                                                                                                                              |                                                                                                                                                                                                                                                                                                                                                                                                                                                                                                                                                                                                                                                                                                                                                                                                                                                                                                                                                                                                                                                                                                                                                                                                                                      |  |                        |   |               |             |         |               |     |            |          |     |  |  |                       |   |               |                |                      |               |                  |                |          |                |  |  |                        |   |               |             |         |               |             |         |          |             |  |
| <i>C</i>                                                                                                                                                                                                       | 23% [graph]                                                                                                                                                                                                                                                                                                                                                                                                                                                                                                                                                                                                                                                                                                                                                                                                                                                                                                                                                                                                                                                                                              |                                                                                                                                                                                                                                                                                                                                                                                                                                                                                                                                                                                                                                                                      |                                                                                                                                                                                                                                                                                                                                                                                                                                                                                                                                                                                                                                                                                                                                                                                                                                                                                                                                                                                                                                                                                                                                                                                                                                      |  |                        |   |               |             |         |               |     |            |          |     |  |  |                       |   |               |                |                      |               |                  |                |          |                |  |  |                        |   |               |             |         |               |             |         |          |             |  |
| <i>Fluocinolone</i>                                                                                                                                                                                            |                                                                                                                                                                                                                                                                                                                                                                                                                                                                                                                                                                                                                                                                                                                                                                                                                                                                                                                                                                                                                                                                                                          |                                                                                                                                                                                                                                                                                                                                                                                                                                                                                                                                                                                                                                                                      |                                                                                                                                                                                                                                                                                                                                                                                                                                                                                                                                                                                                                                                                                                                                                                                                                                                                                                                                                                                                                                                                                                                                                                                                                                      |  |                        |   |               |             |         |               |     |            |          |     |  |  |                       |   |               |                |                      |               |                  |                |          |                |  |  |                        |   |               |             |         |               |             |         |          |             |  |

| Study                                                                                                                                                                                                                         | Participants and baseline values                                                                                                                                                                                                                                                                                                                                                                                                                                                                                                                                                                                                                                                                                                                                                                                                                                                                                                                                                               | Intervention                                                                                                                                                                                                                                                                                                                                                                                                                                                                                                                                                                                                                                                                                                                                                                                                                                                                                                                                                                                        | Outcome (change from baseline at study end)                                                                                                                                                                                                                                                                                                                                                                                                                                                                                                                                                                                                                                                                                                                                                                                                                                                                                                                                                                                                                                                                                                                                                                                                                                                                                                                                                                                                                                                                                                                                                                                                                                                                                                                                                                                |  |                        |   |                |      |           |                |      |            |             |      |    |                |     |                 |                |     |  |          |     |  |  |                       |   |                |        |            |                |        |                |          |        |  |                    |       |                 |          |       |  |
|-------------------------------------------------------------------------------------------------------------------------------------------------------------------------------------------------------------------------------|------------------------------------------------------------------------------------------------------------------------------------------------------------------------------------------------------------------------------------------------------------------------------------------------------------------------------------------------------------------------------------------------------------------------------------------------------------------------------------------------------------------------------------------------------------------------------------------------------------------------------------------------------------------------------------------------------------------------------------------------------------------------------------------------------------------------------------------------------------------------------------------------------------------------------------------------------------------------------------------------|-----------------------------------------------------------------------------------------------------------------------------------------------------------------------------------------------------------------------------------------------------------------------------------------------------------------------------------------------------------------------------------------------------------------------------------------------------------------------------------------------------------------------------------------------------------------------------------------------------------------------------------------------------------------------------------------------------------------------------------------------------------------------------------------------------------------------------------------------------------------------------------------------------------------------------------------------------------------------------------------------------|----------------------------------------------------------------------------------------------------------------------------------------------------------------------------------------------------------------------------------------------------------------------------------------------------------------------------------------------------------------------------------------------------------------------------------------------------------------------------------------------------------------------------------------------------------------------------------------------------------------------------------------------------------------------------------------------------------------------------------------------------------------------------------------------------------------------------------------------------------------------------------------------------------------------------------------------------------------------------------------------------------------------------------------------------------------------------------------------------------------------------------------------------------------------------------------------------------------------------------------------------------------------------------------------------------------------------------------------------------------------------------------------------------------------------------------------------------------------------------------------------------------------------------------------------------------------------------------------------------------------------------------------------------------------------------------------------------------------------------------------------------------------------------------------------------------------------|--|------------------------|---|----------------|------|-----------|----------------|------|------------|-------------|------|----|----------------|-----|-----------------|----------------|-----|--|----------|-----|--|--|-----------------------|---|----------------|--------|------------|----------------|--------|----------------|----------|--------|--|--------------------|-------|-----------------|----------|-------|--|
| <p><b>FAME Study (Campochiaro 2011/ Campochiaro 2012)</b> [29,60]</p> <p>Multicenter international</p> <p><b>Design:</b> 3-arm placebo-controlled RCT</p> <p><b>Follow-up:</b> 24 months; abstract with 36 month outcomes</p> | <p><b>N:</b> 956 eyes of 956 patients</p> <p><b>Inclusion criteria:</b> DMO, CMT <math>\geq 250</math> <math>\mu\text{m}</math> despite at least 1 prior focal/grid macular laser photocoagulation treatment, BCVA ETDRS letter score between 19 and 68 (20/50 to 20/400)</p> <p><b>Exclusion criteria:</b> glaucoma, ocular hypertension, IOP <math>&gt; 21</math> mmHg, taking IOP lowering drops; laser treatment for DMO within 12 weeks of screening, any ocular surgery in the study eye within 12 weeks of screening; ocular or systemic steroid therapy; active ocular infection; pregnancy</p> <p><b>Age:</b> 62.5 SD9.4 years</p> <p><b>Sex:</b> 40.6%</p> <p><b>Diabetes type:</b> 6.6% type 1 DM, 92% type 2 DM, 1.4% uncertain</p> <p><b>HbA1c:</b> 7.8 SD1.59 %</p> <p><b>Baseline VA:</b> ETDRS letter score 53.4 SD12.23</p> <p><b>Baseline CMT:</b> 469.0 SD164.78 <math>\mu\text{m}</math></p> <p><b>Comorbidities:</b> 47.1% cataract at baseline, 62.7 to 67.4% phakic</p> | <p><b>Group 1 (SRFA0.2, n=375 eyes):</b> intravitreal insert releasing 0.2 <math>\mu\text{g/day}</math> fluocinolone acetonide (FA) (2, 3, or 4 treatments received by 21.3, 1.9 and 0.3%)</p> <p><b>Group 2 (SRFA0.5, n=393 eyes):</b> intravitreal insert releasing 0.5 <math>\mu\text{g/day}</math> fluocinolone acetonide (2, 3, or 4 treatments received by 22.6, 2.5 and 0.3%)</p> <p><b>Group 3 (C, n=185 eyes):</b> sham injection (2, 3, or 4 treatments received by 19.5, 2.7 and 1.6%)</p> <p><b>Regimen for all groups:</b> patients could receive rescue focal/grid laser therapy any time after the first 6 weeks for persistent oedema (35.2 to 36.7% in FA groups, 58.9% control group, <math>p &lt; 0.001</math>); treatments were allowed every 3 months for persistent or recurrent oedema; patients eligible for another FA insert at 1 year if <math>\geq 5</math> letter reduction in BCVA or <math>&gt; 50</math> <math>\mu\text{m}</math> CMT increase from best status</p> | <p><b>At 24 months</b></p> <p><b>BCVA (ETDRS):</b></p> <table border="1" data-bbox="1360 329 1843 435"> <thead> <tr> <th></th> <th>BCVA (letters)</th> <th>p</th> </tr> </thead> <tbody> <tr> <td><i>SRFA0.2</i></td> <td>+4.4</td> <td>0.02 vs C</td> </tr> <tr> <td><i>SRFA0.5</i></td> <td>+5.4</td> <td>0.017 vs C</td> </tr> <tr> <td><i>C</i></td> <td>+1.7</td> <td></td> </tr> </tbody> </table> <p><b>plus <math>\geq 15</math> letters</b></p> <table border="1" data-bbox="1360 443 1843 573"> <tbody> <tr> <td><i>SRFA0.2</i></td> <td>29%</td> <td>0.002 SRFA vs C</td> </tr> <tr> <td><i>SRFA0.5</i></td> <td>29%</td> <td></td> </tr> <tr> <td><i>C</i></td> <td>16%</td> <td></td> </tr> </tbody> </table> <p>Subgroups:</p> <ul style="list-style-type: none"> <li>BCVA benefits only in pseudophakic eyes (cataract surgery before or during the study), in phakic eyes, BCVA letter score was reduced by 5 (high dose) and 9 (low dose) from baseline at 24 months</li> </ul> <p><b>CMT (optical coherence tomography):</b></p> <table border="1" data-bbox="1360 751 1843 889"> <thead> <tr> <th></th> <th>CMT (<math>\mu\text{m}</math>)</th> <th>p</th> </tr> </thead> <tbody> <tr> <td><i>SRFA0.2</i></td> <td>-167.8</td> <td>0.005 vs C</td> </tr> <tr> <td><i>SRFA0.5</i></td> <td>-177.1</td> <td><math>&lt; 0.001</math> vs C</td> </tr> <tr> <td><i>C</i></td> <td>-111.3</td> <td></td> </tr> </tbody> </table> <ul style="list-style-type: none"> <li>effect maintained at 36 months</li> </ul> <p><b>At 36 months</b></p> <p><b>plus <math>\geq 15</math> letters</b></p> <table border="1" data-bbox="1360 979 1843 1052"> <tbody> <tr> <td><i>SRFA0.2/0.5</i></td> <td>28.7%</td> <td>0.018 SRFA vs C</td> </tr> <tr> <td><i>C</i></td> <td>18.9%</td> <td></td> </tr> </tbody> </table> |  | BCVA (letters)         | p | <i>SRFA0.2</i> | +4.4 | 0.02 vs C | <i>SRFA0.5</i> | +5.4 | 0.017 vs C | <i>C</i>    | +1.7 |    | <i>SRFA0.2</i> | 29% | 0.002 SRFA vs C | <i>SRFA0.5</i> | 29% |  | <i>C</i> | 16% |  |  | CMT ( $\mu\text{m}$ ) | p | <i>SRFA0.2</i> | -167.8 | 0.005 vs C | <i>SRFA0.5</i> | -177.1 | $< 0.001$ vs C | <i>C</i> | -111.3 |  | <i>SRFA0.2/0.5</i> | 28.7% | 0.018 SRFA vs C | <i>C</i> | 18.9% |  |
|                                                                                                                                                                                                                               | BCVA (letters)                                                                                                                                                                                                                                                                                                                                                                                                                                                                                                                                                                                                                                                                                                                                                                                                                                                                                                                                                                                 | p                                                                                                                                                                                                                                                                                                                                                                                                                                                                                                                                                                                                                                                                                                                                                                                                                                                                                                                                                                                                   |                                                                                                                                                                                                                                                                                                                                                                                                                                                                                                                                                                                                                                                                                                                                                                                                                                                                                                                                                                                                                                                                                                                                                                                                                                                                                                                                                                                                                                                                                                                                                                                                                                                                                                                                                                                                                            |  |                        |   |                |      |           |                |      |            |             |      |    |                |     |                 |                |     |  |          |     |  |  |                       |   |                |        |            |                |        |                |          |        |  |                    |       |                 |          |       |  |
| <i>SRFA0.2</i>                                                                                                                                                                                                                | +4.4                                                                                                                                                                                                                                                                                                                                                                                                                                                                                                                                                                                                                                                                                                                                                                                                                                                                                                                                                                                           | 0.02 vs C                                                                                                                                                                                                                                                                                                                                                                                                                                                                                                                                                                                                                                                                                                                                                                                                                                                                                                                                                                                           |                                                                                                                                                                                                                                                                                                                                                                                                                                                                                                                                                                                                                                                                                                                                                                                                                                                                                                                                                                                                                                                                                                                                                                                                                                                                                                                                                                                                                                                                                                                                                                                                                                                                                                                                                                                                                            |  |                        |   |                |      |           |                |      |            |             |      |    |                |     |                 |                |     |  |          |     |  |  |                       |   |                |        |            |                |        |                |          |        |  |                    |       |                 |          |       |  |
| <i>SRFA0.5</i>                                                                                                                                                                                                                | +5.4                                                                                                                                                                                                                                                                                                                                                                                                                                                                                                                                                                                                                                                                                                                                                                                                                                                                                                                                                                                           | 0.017 vs C                                                                                                                                                                                                                                                                                                                                                                                                                                                                                                                                                                                                                                                                                                                                                                                                                                                                                                                                                                                          |                                                                                                                                                                                                                                                                                                                                                                                                                                                                                                                                                                                                                                                                                                                                                                                                                                                                                                                                                                                                                                                                                                                                                                                                                                                                                                                                                                                                                                                                                                                                                                                                                                                                                                                                                                                                                            |  |                        |   |                |      |           |                |      |            |             |      |    |                |     |                 |                |     |  |          |     |  |  |                       |   |                |        |            |                |        |                |          |        |  |                    |       |                 |          |       |  |
| <i>C</i>                                                                                                                                                                                                                      | +1.7                                                                                                                                                                                                                                                                                                                                                                                                                                                                                                                                                                                                                                                                                                                                                                                                                                                                                                                                                                                           |                                                                                                                                                                                                                                                                                                                                                                                                                                                                                                                                                                                                                                                                                                                                                                                                                                                                                                                                                                                                     |                                                                                                                                                                                                                                                                                                                                                                                                                                                                                                                                                                                                                                                                                                                                                                                                                                                                                                                                                                                                                                                                                                                                                                                                                                                                                                                                                                                                                                                                                                                                                                                                                                                                                                                                                                                                                            |  |                        |   |                |      |           |                |      |            |             |      |    |                |     |                 |                |     |  |          |     |  |  |                       |   |                |        |            |                |        |                |          |        |  |                    |       |                 |          |       |  |
| <i>SRFA0.2</i>                                                                                                                                                                                                                | 29%                                                                                                                                                                                                                                                                                                                                                                                                                                                                                                                                                                                                                                                                                                                                                                                                                                                                                                                                                                                            | 0.002 SRFA vs C                                                                                                                                                                                                                                                                                                                                                                                                                                                                                                                                                                                                                                                                                                                                                                                                                                                                                                                                                                                     |                                                                                                                                                                                                                                                                                                                                                                                                                                                                                                                                                                                                                                                                                                                                                                                                                                                                                                                                                                                                                                                                                                                                                                                                                                                                                                                                                                                                                                                                                                                                                                                                                                                                                                                                                                                                                            |  |                        |   |                |      |           |                |      |            |             |      |    |                |     |                 |                |     |  |          |     |  |  |                       |   |                |        |            |                |        |                |          |        |  |                    |       |                 |          |       |  |
| <i>SRFA0.5</i>                                                                                                                                                                                                                | 29%                                                                                                                                                                                                                                                                                                                                                                                                                                                                                                                                                                                                                                                                                                                                                                                                                                                                                                                                                                                            |                                                                                                                                                                                                                                                                                                                                                                                                                                                                                                                                                                                                                                                                                                                                                                                                                                                                                                                                                                                                     |                                                                                                                                                                                                                                                                                                                                                                                                                                                                                                                                                                                                                                                                                                                                                                                                                                                                                                                                                                                                                                                                                                                                                                                                                                                                                                                                                                                                                                                                                                                                                                                                                                                                                                                                                                                                                            |  |                        |   |                |      |           |                |      |            |             |      |    |                |     |                 |                |     |  |          |     |  |  |                       |   |                |        |            |                |        |                |          |        |  |                    |       |                 |          |       |  |
| <i>C</i>                                                                                                                                                                                                                      | 16%                                                                                                                                                                                                                                                                                                                                                                                                                                                                                                                                                                                                                                                                                                                                                                                                                                                                                                                                                                                            |                                                                                                                                                                                                                                                                                                                                                                                                                                                                                                                                                                                                                                                                                                                                                                                                                                                                                                                                                                                                     |                                                                                                                                                                                                                                                                                                                                                                                                                                                                                                                                                                                                                                                                                                                                                                                                                                                                                                                                                                                                                                                                                                                                                                                                                                                                                                                                                                                                                                                                                                                                                                                                                                                                                                                                                                                                                            |  |                        |   |                |      |           |                |      |            |             |      |    |                |     |                 |                |     |  |          |     |  |  |                       |   |                |        |            |                |        |                |          |        |  |                    |       |                 |          |       |  |
|                                                                                                                                                                                                                               | CMT ( $\mu\text{m}$ )                                                                                                                                                                                                                                                                                                                                                                                                                                                                                                                                                                                                                                                                                                                                                                                                                                                                                                                                                                          | p                                                                                                                                                                                                                                                                                                                                                                                                                                                                                                                                                                                                                                                                                                                                                                                                                                                                                                                                                                                                   |                                                                                                                                                                                                                                                                                                                                                                                                                                                                                                                                                                                                                                                                                                                                                                                                                                                                                                                                                                                                                                                                                                                                                                                                                                                                                                                                                                                                                                                                                                                                                                                                                                                                                                                                                                                                                            |  |                        |   |                |      |           |                |      |            |             |      |    |                |     |                 |                |     |  |          |     |  |  |                       |   |                |        |            |                |        |                |          |        |  |                    |       |                 |          |       |  |
| <i>SRFA0.2</i>                                                                                                                                                                                                                | -167.8                                                                                                                                                                                                                                                                                                                                                                                                                                                                                                                                                                                                                                                                                                                                                                                                                                                                                                                                                                                         | 0.005 vs C                                                                                                                                                                                                                                                                                                                                                                                                                                                                                                                                                                                                                                                                                                                                                                                                                                                                                                                                                                                          |                                                                                                                                                                                                                                                                                                                                                                                                                                                                                                                                                                                                                                                                                                                                                                                                                                                                                                                                                                                                                                                                                                                                                                                                                                                                                                                                                                                                                                                                                                                                                                                                                                                                                                                                                                                                                            |  |                        |   |                |      |           |                |      |            |             |      |    |                |     |                 |                |     |  |          |     |  |  |                       |   |                |        |            |                |        |                |          |        |  |                    |       |                 |          |       |  |
| <i>SRFA0.5</i>                                                                                                                                                                                                                | -177.1                                                                                                                                                                                                                                                                                                                                                                                                                                                                                                                                                                                                                                                                                                                                                                                                                                                                                                                                                                                         | $< 0.001$ vs C                                                                                                                                                                                                                                                                                                                                                                                                                                                                                                                                                                                                                                                                                                                                                                                                                                                                                                                                                                                      |                                                                                                                                                                                                                                                                                                                                                                                                                                                                                                                                                                                                                                                                                                                                                                                                                                                                                                                                                                                                                                                                                                                                                                                                                                                                                                                                                                                                                                                                                                                                                                                                                                                                                                                                                                                                                            |  |                        |   |                |      |           |                |      |            |             |      |    |                |     |                 |                |     |  |          |     |  |  |                       |   |                |        |            |                |        |                |          |        |  |                    |       |                 |          |       |  |
| <i>C</i>                                                                                                                                                                                                                      | -111.3                                                                                                                                                                                                                                                                                                                                                                                                                                                                                                                                                                                                                                                                                                                                                                                                                                                                                                                                                                                         |                                                                                                                                                                                                                                                                                                                                                                                                                                                                                                                                                                                                                                                                                                                                                                                                                                                                                                                                                                                                     |                                                                                                                                                                                                                                                                                                                                                                                                                                                                                                                                                                                                                                                                                                                                                                                                                                                                                                                                                                                                                                                                                                                                                                                                                                                                                                                                                                                                                                                                                                                                                                                                                                                                                                                                                                                                                            |  |                        |   |                |      |           |                |      |            |             |      |    |                |     |                 |                |     |  |          |     |  |  |                       |   |                |        |            |                |        |                |          |        |  |                    |       |                 |          |       |  |
| <i>SRFA0.2/0.5</i>                                                                                                                                                                                                            | 28.7%                                                                                                                                                                                                                                                                                                                                                                                                                                                                                                                                                                                                                                                                                                                                                                                                                                                                                                                                                                                          | 0.018 SRFA vs C                                                                                                                                                                                                                                                                                                                                                                                                                                                                                                                                                                                                                                                                                                                                                                                                                                                                                                                                                                                     |                                                                                                                                                                                                                                                                                                                                                                                                                                                                                                                                                                                                                                                                                                                                                                                                                                                                                                                                                                                                                                                                                                                                                                                                                                                                                                                                                                                                                                                                                                                                                                                                                                                                                                                                                                                                                            |  |                        |   |                |      |           |                |      |            |             |      |    |                |     |                 |                |     |  |          |     |  |  |                       |   |                |        |            |                |        |                |          |        |  |                    |       |                 |          |       |  |
| <i>C</i>                                                                                                                                                                                                                      | 18.9%                                                                                                                                                                                                                                                                                                                                                                                                                                                                                                                                                                                                                                                                                                                                                                                                                                                                                                                                                                                          |                                                                                                                                                                                                                                                                                                                                                                                                                                                                                                                                                                                                                                                                                                                                                                                                                                                                                                                                                                                                     |                                                                                                                                                                                                                                                                                                                                                                                                                                                                                                                                                                                                                                                                                                                                                                                                                                                                                                                                                                                                                                                                                                                                                                                                                                                                                                                                                                                                                                                                                                                                                                                                                                                                                                                                                                                                                            |  |                        |   |                |      |           |                |      |            |             |      |    |                |     |                 |                |     |  |          |     |  |  |                       |   |                |        |            |                |        |                |          |        |  |                    |       |                 |          |       |  |
| <p><b>Pearson 2011</b>[43]</p> <p>USA</p> <p>Multicenter</p> <p><b>Design:</b> 2-arm RCT</p> <p><b>Follow-up:</b> 36 months</p>                                                                                               | <p><b>N:</b> 196 patients</p> <p><b>Inclusion criteria:</b> persistent or recurrent unilateral or bilateral DMO with retinal thickening involving fixation of <math>\geq 1</math> disc area in size, ETDRS visual acuity of <math>\geq 20</math> letters (20/400) to <math>\leq 68</math> letters (20/50) and <math>\geq 1</math> macular laser treatment in the study eye more than 12 weeks prior to enrollment</p> <p><b>Exclusion criteria:</b> Ocular surgery within 3 months prior to enrolment, uncontrolled IOP within the past 12 months while on <math>\geq 1</math> antiglaucoma medication, IOP of <math>\geq 22</math> mmHg at screening while on <math>\geq 1</math> antiglaucoma medication, peripheral retinal detachment in the area of implantation or media</p>                                                                                                                                                                                                             | <p><b>Group 1 (SRFA, n= 127):</b> 0.5 mg sustained release fluocinolone acetonide intravitreal implant</p> <p><b>Group 2 (SOC, n= 69):</b> standard of care – either repeat laser or observation</p> <p><b>Laser ETDRS protocol</b></p>                                                                                                                                                                                                                                                                                                                                                                                                                                                                                                                                                                                                                                                                                                                                                             | <p><b>At 3 years</b></p> <p><b>BCVA:</b></p> <table border="1" data-bbox="1360 1109 1843 1214"> <thead> <tr> <th></th> <th>gain <math>\geq 15</math> letters</th> <th>p</th> </tr> </thead> <tbody> <tr> <td><i>SRFA</i></td> <td>31%</td> <td>NS</td> </tr> <tr> <td><i>SOC</i></td> <td>20%</td> <td></td> </tr> </tbody> </table> <p><b>loss <math>\geq 15</math> letters</b></p> <table border="1" data-bbox="1360 1222 1843 1295"> <tbody> <tr> <td><i>SRFA</i></td> <td>17%</td> <td>NS</td> </tr> <tr> <td><i>SOC</i></td> <td>14%</td> <td></td> </tr> </tbody> </table> <p><b>CMT:</b></p>                                                                                                                                                                                                                                                                                                                                                                                                                                                                                                                                                                                                                                                                                                                                                                                                                                                                                                                                                                                                                                                                                                                                                                                                                        |  | gain $\geq 15$ letters | p | <i>SRFA</i>    | 31%  | NS        | <i>SOC</i>     | 20%  |            | <i>SRFA</i> | 17%  | NS | <i>SOC</i>     | 14% |                 |                |     |  |          |     |  |  |                       |   |                |        |            |                |        |                |          |        |  |                    |       |                 |          |       |  |
|                                                                                                                                                                                                                               | gain $\geq 15$ letters                                                                                                                                                                                                                                                                                                                                                                                                                                                                                                                                                                                                                                                                                                                                                                                                                                                                                                                                                                         | p                                                                                                                                                                                                                                                                                                                                                                                                                                                                                                                                                                                                                                                                                                                                                                                                                                                                                                                                                                                                   |                                                                                                                                                                                                                                                                                                                                                                                                                                                                                                                                                                                                                                                                                                                                                                                                                                                                                                                                                                                                                                                                                                                                                                                                                                                                                                                                                                                                                                                                                                                                                                                                                                                                                                                                                                                                                            |  |                        |   |                |      |           |                |      |            |             |      |    |                |     |                 |                |     |  |          |     |  |  |                       |   |                |        |            |                |        |                |          |        |  |                    |       |                 |          |       |  |
| <i>SRFA</i>                                                                                                                                                                                                                   | 31%                                                                                                                                                                                                                                                                                                                                                                                                                                                                                                                                                                                                                                                                                                                                                                                                                                                                                                                                                                                            | NS                                                                                                                                                                                                                                                                                                                                                                                                                                                                                                                                                                                                                                                                                                                                                                                                                                                                                                                                                                                                  |                                                                                                                                                                                                                                                                                                                                                                                                                                                                                                                                                                                                                                                                                                                                                                                                                                                                                                                                                                                                                                                                                                                                                                                                                                                                                                                                                                                                                                                                                                                                                                                                                                                                                                                                                                                                                            |  |                        |   |                |      |           |                |      |            |             |      |    |                |     |                 |                |     |  |          |     |  |  |                       |   |                |        |            |                |        |                |          |        |  |                    |       |                 |          |       |  |
| <i>SOC</i>                                                                                                                                                                                                                    | 20%                                                                                                                                                                                                                                                                                                                                                                                                                                                                                                                                                                                                                                                                                                                                                                                                                                                                                                                                                                                            |                                                                                                                                                                                                                                                                                                                                                                                                                                                                                                                                                                                                                                                                                                                                                                                                                                                                                                                                                                                                     |                                                                                                                                                                                                                                                                                                                                                                                                                                                                                                                                                                                                                                                                                                                                                                                                                                                                                                                                                                                                                                                                                                                                                                                                                                                                                                                                                                                                                                                                                                                                                                                                                                                                                                                                                                                                                            |  |                        |   |                |      |           |                |      |            |             |      |    |                |     |                 |                |     |  |          |     |  |  |                       |   |                |        |            |                |        |                |          |        |  |                    |       |                 |          |       |  |
| <i>SRFA</i>                                                                                                                                                                                                                   | 17%                                                                                                                                                                                                                                                                                                                                                                                                                                                                                                                                                                                                                                                                                                                                                                                                                                                                                                                                                                                            | NS                                                                                                                                                                                                                                                                                                                                                                                                                                                                                                                                                                                                                                                                                                                                                                                                                                                                                                                                                                                                  |                                                                                                                                                                                                                                                                                                                                                                                                                                                                                                                                                                                                                                                                                                                                                                                                                                                                                                                                                                                                                                                                                                                                                                                                                                                                                                                                                                                                                                                                                                                                                                                                                                                                                                                                                                                                                            |  |                        |   |                |      |           |                |      |            |             |      |    |                |     |                 |                |     |  |          |     |  |  |                       |   |                |        |            |                |        |                |          |        |  |                    |       |                 |          |       |  |
| <i>SOC</i>                                                                                                                                                                                                                    | 14%                                                                                                                                                                                                                                                                                                                                                                                                                                                                                                                                                                                                                                                                                                                                                                                                                                                                                                                                                                                            |                                                                                                                                                                                                                                                                                                                                                                                                                                                                                                                                                                                                                                                                                                                                                                                                                                                                                                                                                                                                     |                                                                                                                                                                                                                                                                                                                                                                                                                                                                                                                                                                                                                                                                                                                                                                                                                                                                                                                                                                                                                                                                                                                                                                                                                                                                                                                                                                                                                                                                                                                                                                                                                                                                                                                                                                                                                            |  |                        |   |                |      |           |                |      |            |             |      |    |                |     |                 |                |     |  |          |     |  |  |                       |   |                |        |            |                |        |                |          |        |  |                    |       |                 |          |       |  |

1  
2  
3  
4  
5  
6  
7  
8  
9  
10  
11  
12  
13  
14  
15  
16  
17  
18  
19  
20  
21  
22  
23  
24  
25  
26  
27  
28  
29  
30  
31  
32  
33  
34  
35  
36  
37  
38  
39  
40  
41  
42  
43  
44  
45  
46  
47  
48  
49

| Study       | Participants and baseline values                                                                                                                                                                                                                                                                                | Intervention | Outcome (change from baseline at study end)                                                                                                                                                                                                                                                                                                                                                                                                                                                                                                  |  |  |                |   |  |              |  |             |     |    |            |      |  |
|-------------|-----------------------------------------------------------------------------------------------------------------------------------------------------------------------------------------------------------------------------------------------------------------------------------------------------------------|--------------|----------------------------------------------------------------------------------------------------------------------------------------------------------------------------------------------------------------------------------------------------------------------------------------------------------------------------------------------------------------------------------------------------------------------------------------------------------------------------------------------------------------------------------------------|--|--|----------------|---|--|--------------|--|-------------|-----|----|------------|------|--|
|             | opacity precluding diagnosis of status in the study eye<br><b>Age:</b> 61.4-62.7 years<br><b>Sex:</b> 41.7-42% female<br><b>Diabetes type:</b> 62.3-70% on insulin<br><b>HbA1c:</b> not reported<br><b>Baseline VA:</b> not reported<br><b>Baseline CMT:</b> not reported<br><b>Comorbidities:</b> not reported |              | <table border="1"> <thead> <tr> <th></th> <th data-bbox="1457 282 1619 303">Mean change in</th> <th data-bbox="1696 282 1717 303">p</th> </tr> <tr> <th></th> <th colspan="2" data-bbox="1457 306 1717 328">baseline CMT</th> </tr> </thead> <tbody> <tr> <td data-bbox="1373 331 1436 352"><i>SRFA</i></td> <td data-bbox="1457 331 1499 352">-86</td> <td data-bbox="1696 331 1738 352">NS</td> </tr> <tr> <td data-bbox="1373 355 1436 376"><i>SOC</i></td> <td data-bbox="1457 355 1520 376">-110</td> <td></td> </tr> </tbody> </table> |  |  | Mean change in | p |  | baseline CMT |  | <i>SRFA</i> | -86 | NS | <i>SOC</i> | -110 |  |
|             | Mean change in                                                                                                                                                                                                                                                                                                  | p            |                                                                                                                                                                                                                                                                                                                                                                                                                                                                                                                                              |  |  |                |   |  |              |  |             |     |    |            |      |  |
|             | baseline CMT                                                                                                                                                                                                                                                                                                    |              |                                                                                                                                                                                                                                                                                                                                                                                                                                                                                                                                              |  |  |                |   |  |              |  |             |     |    |            |      |  |
| <i>SRFA</i> | -86                                                                                                                                                                                                                                                                                                             | NS           |                                                                                                                                                                                                                                                                                                                                                                                                                                                                                                                                              |  |  |                |   |  |              |  |             |     |    |            |      |  |
| <i>SOC</i>  | -110                                                                                                                                                                                                                                                                                                            |              |                                                                                                                                                                                                                                                                                                                                                                                                                                                                                                                                              |  |  |                |   |  |              |  |             |     |    |            |      |  |

Abbreviations: See table 2

For peer review only

Table 7: Triamcinolone studies

| Study                                                                                                                                                                                                          | Participants and baseline values                                                                                                                                                                                                                                                                                                                                                                                                                                                                                                                                                                                                                                                                                                                                                                                                                                                                                                                                                                                                                                                                                                                                                                                                                      | Intervention                                                                                                                                                                                                                                                                                                                                                                                                                                                                                                                                                                                                                                                                                                                                                                                                                                                                                                                                                                                                                                                                                                                                                                                                                         | Outcome (change from baseline at study end)                                                                                                                                                                                                                                                                                                                                                                                                                                                                                                                                                                                                                                                                                                                                                                                                                                                                                                                                                                                                                                                                                                                                                                                                                                                                                                                                                                                                                                                                                                                                                                                                                                                                                                                                                                                                                                                                                                                                                     |  |                |   |             |         |           |             |         |            |          |         |            |  |               |   |             |                                                       |                       |             |                                                       |           |          |                                                       |  |  |                |   |             |           |                         |             |           |             |          |            |  |  |       |       |   |             |     |     |  |             |     |     |            |
|----------------------------------------------------------------------------------------------------------------------------------------------------------------------------------------------------------------|-------------------------------------------------------------------------------------------------------------------------------------------------------------------------------------------------------------------------------------------------------------------------------------------------------------------------------------------------------------------------------------------------------------------------------------------------------------------------------------------------------------------------------------------------------------------------------------------------------------------------------------------------------------------------------------------------------------------------------------------------------------------------------------------------------------------------------------------------------------------------------------------------------------------------------------------------------------------------------------------------------------------------------------------------------------------------------------------------------------------------------------------------------------------------------------------------------------------------------------------------------|--------------------------------------------------------------------------------------------------------------------------------------------------------------------------------------------------------------------------------------------------------------------------------------------------------------------------------------------------------------------------------------------------------------------------------------------------------------------------------------------------------------------------------------------------------------------------------------------------------------------------------------------------------------------------------------------------------------------------------------------------------------------------------------------------------------------------------------------------------------------------------------------------------------------------------------------------------------------------------------------------------------------------------------------------------------------------------------------------------------------------------------------------------------------------------------------------------------------------------------|-------------------------------------------------------------------------------------------------------------------------------------------------------------------------------------------------------------------------------------------------------------------------------------------------------------------------------------------------------------------------------------------------------------------------------------------------------------------------------------------------------------------------------------------------------------------------------------------------------------------------------------------------------------------------------------------------------------------------------------------------------------------------------------------------------------------------------------------------------------------------------------------------------------------------------------------------------------------------------------------------------------------------------------------------------------------------------------------------------------------------------------------------------------------------------------------------------------------------------------------------------------------------------------------------------------------------------------------------------------------------------------------------------------------------------------------------------------------------------------------------------------------------------------------------------------------------------------------------------------------------------------------------------------------------------------------------------------------------------------------------------------------------------------------------------------------------------------------------------------------------------------------------------------------------------------------------------------------------------------------------|--|----------------|---|-------------|---------|-----------|-------------|---------|------------|----------|---------|------------|--|---------------|---|-------------|-------------------------------------------------------|-----------------------|-------------|-------------------------------------------------------|-----------|----------|-------------------------------------------------------|--|--|----------------|---|-------------|-----------|-------------------------|-------------|-----------|-------------|----------|------------|--|--|-------|-------|---|-------------|-----|-----|--|-------------|-----|-----|------------|
| <p><b>DRCR Network 2008 (Ip 2008a / 2008b / Beck 2009 / Bressler 2009)</b>[22,61,63,64]<br/>USA<br/>Multicenter</p> <p><b>Design:</b> 3-arm RCT<br/><b>Follow-up:</b> 2 years, additional 3 year follow-up</p> | <p><b>N:</b> 840 eyes of 693 patients<br/><b>Inclusion criteria:</b> &gt;18 years, type 1 or 2 DM, study eye: (1) BCVA (E-ETDRS) between 24 and 73 (20/320 and 20/40), (2) retinal thickening due to DMO involving the center of the macula main cause for visual loss, (3) CMT <math>\geq</math>250 <math>\mu</math>m, (4) no expectation of scatter photocoagulation within 4 months<br/><b>Exclusion criteria:</b> any prior treatment with IV corticosteroids, peribulbar steroid injection within prior 6 months, photocoagulation for DMO within prior 15 weeks, panretinal scatter photocoagulation within prior 4 months, pars plana vitrectomy, history of open-angle glaucoma or steroid-induced IOP elevation requiring IOP-lowering treatment, and IOP <math>\geq</math>25 mmHg<br/><b>Age:</b> 63 SD9 years<br/><b>Sex:</b> 49% female<br/><b>Diabetes type:</b> 95% type 2 DM, 5% type 1 DM<br/><b>HbA1c:</b> 7.9 SD1.8%<br/><b>Baseline VA:</b> ETDRS letter score 59 SD11 (~20/63)<br/><b>Baseline CMT:</b> 24 SD130 <math>\mu</math>m<br/><b>Comorbidities:</b> 21% pseudophakic, 2% ocular hypertension, 7% mild NPDR, 13% moderate NPDR, 40% moderately severe NPDR, 11% severe NPDR, 23.5% mild to moderate, 3% high risk PDR</p> | <p><b>Group 1 (IVT1, n=256 eyes):</b><br/>1 mg IV triamcinolone (3.5 treatments)<br/><b>Group 2 (IVT4, n=254 eyes):</b><br/>4 mg IV triamcinolone (3.1 treatments)<br/><b>Group 3 (L, n=330 eyes):</b><br/>focal/grid photocoagulation (2.9 treatments)<br/><b>Regimen for all groups:</b><br/>retreatment protocol: where indicated, retreatment was performed within 4 weeks after the follow-up visit and no sooner than 3.5 months from the time of last treatment; eyes were generally retreated unless:<br/>(1) little or no oedema involving the center of the macula present and CMT <math>\leq</math>225 <math>\mu</math>m, (2) VA letter score <math>\geq</math>79 (20/25 or better), (3) substantial improvement in macular oedema since last treatment (e.g., <math>\geq</math> 50% decrease in CMT), (4) clinically significant adverse effect from prior treatment, (5) additional treatment deemed futile (&lt;5 letter improvement in VA letter score or lack of CMT reduction), and (6) for laser group, complete focal/grid photocoagulation already given, with no areas identified for which additional treatment was indicated<br/><b>Laser Modified ETDRS protocol</b> as used in prior DRCR.net protocols</p> | <p><b>At 2 years</b><br/><b>BCVA (E-ETDRS):</b></p> <table border="1"> <thead> <tr> <th></th> <th>BCVA (letters)</th> <th>p</th> </tr> </thead> <tbody> <tr> <td><i>IVT1</i></td> <td>-2 SD18</td> <td>0.02 vs L</td> </tr> <tr> <td><i>IVT4</i></td> <td>-3 SD22</td> <td>NS vs IVT4</td> </tr> <tr> <td><i>L</i></td> <td>+1 SD17</td> <td>0.002 vs L</td> </tr> </tbody> </table> <p><b>BCVA gain categories</b></p> <table border="1"> <thead> <tr> <th></th> <th>Gain category</th> <th>p</th> </tr> </thead> <tbody> <tr> <td><i>IVT1</i></td> <td>+10 or more: 25%<br/>+9 to -9: 50%<br/>-10 or more: 26%</td> <td>0.03 vs L, NS vs IVT4</td> </tr> <tr> <td><i>IVT4</i></td> <td>+10 or more: 28%<br/>+9 to -9: 44%<br/>-10 or more: 28%</td> <td>0.01 vs L</td> </tr> <tr> <td><i>L</i></td> <td>+10 or more: 31%<br/>+9 to -9: 50%<br/>-10 or more: 19%</td> <td></td> </tr> </tbody> </table> <p>Subgroups:</p> <ul style="list-style-type: none"> <li>• similar results when considering only pseudophakic eyes or eyes with minimal cataract</li> <li>• no substantially different results based on baseline VA, baseline CMT, history of focal/grid photocoagulation for DMO</li> <li>• 3 year results consistent with 2 year results for BCVA and CMT</li> </ul> <p><b>CMT (OCT):</b></p> <table border="1"> <thead> <tr> <th></th> <th>CMT (<math>\mu</math>m)</th> <th>p</th> </tr> </thead> <tbody> <tr> <td><i>IVT1</i></td> <td>-86 SD167</td> <td>&lt;0.001 vs L, NS vs IVT4</td> </tr> <tr> <td><i>IVT4</i></td> <td>-77 SD160</td> <td>&lt;0.001 vs L</td> </tr> <tr> <td><i>L</i></td> <td>-139 SD148</td> <td></td> </tr> </tbody> </table> <p><b>Progression of retinopathy:</b></p> <table border="1"> <thead> <tr> <th></th> <th>2 yrs</th> <th>3 yrs</th> <th>p</th> </tr> </thead> <tbody> <tr> <td><i>IVT1</i></td> <td>29%</td> <td>35%</td> <td></td> </tr> <tr> <td><i>IVT4</i></td> <td>21%</td> <td>30%</td> <td>&lt;0.05 vs L</td> </tr> </tbody> </table> |  | BCVA (letters) | p | <i>IVT1</i> | -2 SD18 | 0.02 vs L | <i>IVT4</i> | -3 SD22 | NS vs IVT4 | <i>L</i> | +1 SD17 | 0.002 vs L |  | Gain category | p | <i>IVT1</i> | +10 or more: 25%<br>+9 to -9: 50%<br>-10 or more: 26% | 0.03 vs L, NS vs IVT4 | <i>IVT4</i> | +10 or more: 28%<br>+9 to -9: 44%<br>-10 or more: 28% | 0.01 vs L | <i>L</i> | +10 or more: 31%<br>+9 to -9: 50%<br>-10 or more: 19% |  |  | CMT ( $\mu$ m) | p | <i>IVT1</i> | -86 SD167 | <0.001 vs L, NS vs IVT4 | <i>IVT4</i> | -77 SD160 | <0.001 vs L | <i>L</i> | -139 SD148 |  |  | 2 yrs | 3 yrs | p | <i>IVT1</i> | 29% | 35% |  | <i>IVT4</i> | 21% | 30% | <0.05 vs L |
|                                                                                                                                                                                                                | BCVA (letters)                                                                                                                                                                                                                                                                                                                                                                                                                                                                                                                                                                                                                                                                                                                                                                                                                                                                                                                                                                                                                                                                                                                                                                                                                                        | p                                                                                                                                                                                                                                                                                                                                                                                                                                                                                                                                                                                                                                                                                                                                                                                                                                                                                                                                                                                                                                                                                                                                                                                                                                    |                                                                                                                                                                                                                                                                                                                                                                                                                                                                                                                                                                                                                                                                                                                                                                                                                                                                                                                                                                                                                                                                                                                                                                                                                                                                                                                                                                                                                                                                                                                                                                                                                                                                                                                                                                                                                                                                                                                                                                                                 |  |                |   |             |         |           |             |         |            |          |         |            |  |               |   |             |                                                       |                       |             |                                                       |           |          |                                                       |  |  |                |   |             |           |                         |             |           |             |          |            |  |  |       |       |   |             |     |     |  |             |     |     |            |
| <i>IVT1</i>                                                                                                                                                                                                    | -2 SD18                                                                                                                                                                                                                                                                                                                                                                                                                                                                                                                                                                                                                                                                                                                                                                                                                                                                                                                                                                                                                                                                                                                                                                                                                                               | 0.02 vs L                                                                                                                                                                                                                                                                                                                                                                                                                                                                                                                                                                                                                                                                                                                                                                                                                                                                                                                                                                                                                                                                                                                                                                                                                            |                                                                                                                                                                                                                                                                                                                                                                                                                                                                                                                                                                                                                                                                                                                                                                                                                                                                                                                                                                                                                                                                                                                                                                                                                                                                                                                                                                                                                                                                                                                                                                                                                                                                                                                                                                                                                                                                                                                                                                                                 |  |                |   |             |         |           |             |         |            |          |         |            |  |               |   |             |                                                       |                       |             |                                                       |           |          |                                                       |  |  |                |   |             |           |                         |             |           |             |          |            |  |  |       |       |   |             |     |     |  |             |     |     |            |
| <i>IVT4</i>                                                                                                                                                                                                    | -3 SD22                                                                                                                                                                                                                                                                                                                                                                                                                                                                                                                                                                                                                                                                                                                                                                                                                                                                                                                                                                                                                                                                                                                                                                                                                                               | NS vs IVT4                                                                                                                                                                                                                                                                                                                                                                                                                                                                                                                                                                                                                                                                                                                                                                                                                                                                                                                                                                                                                                                                                                                                                                                                                           |                                                                                                                                                                                                                                                                                                                                                                                                                                                                                                                                                                                                                                                                                                                                                                                                                                                                                                                                                                                                                                                                                                                                                                                                                                                                                                                                                                                                                                                                                                                                                                                                                                                                                                                                                                                                                                                                                                                                                                                                 |  |                |   |             |         |           |             |         |            |          |         |            |  |               |   |             |                                                       |                       |             |                                                       |           |          |                                                       |  |  |                |   |             |           |                         |             |           |             |          |            |  |  |       |       |   |             |     |     |  |             |     |     |            |
| <i>L</i>                                                                                                                                                                                                       | +1 SD17                                                                                                                                                                                                                                                                                                                                                                                                                                                                                                                                                                                                                                                                                                                                                                                                                                                                                                                                                                                                                                                                                                                                                                                                                                               | 0.002 vs L                                                                                                                                                                                                                                                                                                                                                                                                                                                                                                                                                                                                                                                                                                                                                                                                                                                                                                                                                                                                                                                                                                                                                                                                                           |                                                                                                                                                                                                                                                                                                                                                                                                                                                                                                                                                                                                                                                                                                                                                                                                                                                                                                                                                                                                                                                                                                                                                                                                                                                                                                                                                                                                                                                                                                                                                                                                                                                                                                                                                                                                                                                                                                                                                                                                 |  |                |   |             |         |           |             |         |            |          |         |            |  |               |   |             |                                                       |                       |             |                                                       |           |          |                                                       |  |  |                |   |             |           |                         |             |           |             |          |            |  |  |       |       |   |             |     |     |  |             |     |     |            |
|                                                                                                                                                                                                                | Gain category                                                                                                                                                                                                                                                                                                                                                                                                                                                                                                                                                                                                                                                                                                                                                                                                                                                                                                                                                                                                                                                                                                                                                                                                                                         | p                                                                                                                                                                                                                                                                                                                                                                                                                                                                                                                                                                                                                                                                                                                                                                                                                                                                                                                                                                                                                                                                                                                                                                                                                                    |                                                                                                                                                                                                                                                                                                                                                                                                                                                                                                                                                                                                                                                                                                                                                                                                                                                                                                                                                                                                                                                                                                                                                                                                                                                                                                                                                                                                                                                                                                                                                                                                                                                                                                                                                                                                                                                                                                                                                                                                 |  |                |   |             |         |           |             |         |            |          |         |            |  |               |   |             |                                                       |                       |             |                                                       |           |          |                                                       |  |  |                |   |             |           |                         |             |           |             |          |            |  |  |       |       |   |             |     |     |  |             |     |     |            |
| <i>IVT1</i>                                                                                                                                                                                                    | +10 or more: 25%<br>+9 to -9: 50%<br>-10 or more: 26%                                                                                                                                                                                                                                                                                                                                                                                                                                                                                                                                                                                                                                                                                                                                                                                                                                                                                                                                                                                                                                                                                                                                                                                                 | 0.03 vs L, NS vs IVT4                                                                                                                                                                                                                                                                                                                                                                                                                                                                                                                                                                                                                                                                                                                                                                                                                                                                                                                                                                                                                                                                                                                                                                                                                |                                                                                                                                                                                                                                                                                                                                                                                                                                                                                                                                                                                                                                                                                                                                                                                                                                                                                                                                                                                                                                                                                                                                                                                                                                                                                                                                                                                                                                                                                                                                                                                                                                                                                                                                                                                                                                                                                                                                                                                                 |  |                |   |             |         |           |             |         |            |          |         |            |  |               |   |             |                                                       |                       |             |                                                       |           |          |                                                       |  |  |                |   |             |           |                         |             |           |             |          |            |  |  |       |       |   |             |     |     |  |             |     |     |            |
| <i>IVT4</i>                                                                                                                                                                                                    | +10 or more: 28%<br>+9 to -9: 44%<br>-10 or more: 28%                                                                                                                                                                                                                                                                                                                                                                                                                                                                                                                                                                                                                                                                                                                                                                                                                                                                                                                                                                                                                                                                                                                                                                                                 | 0.01 vs L                                                                                                                                                                                                                                                                                                                                                                                                                                                                                                                                                                                                                                                                                                                                                                                                                                                                                                                                                                                                                                                                                                                                                                                                                            |                                                                                                                                                                                                                                                                                                                                                                                                                                                                                                                                                                                                                                                                                                                                                                                                                                                                                                                                                                                                                                                                                                                                                                                                                                                                                                                                                                                                                                                                                                                                                                                                                                                                                                                                                                                                                                                                                                                                                                                                 |  |                |   |             |         |           |             |         |            |          |         |            |  |               |   |             |                                                       |                       |             |                                                       |           |          |                                                       |  |  |                |   |             |           |                         |             |           |             |          |            |  |  |       |       |   |             |     |     |  |             |     |     |            |
| <i>L</i>                                                                                                                                                                                                       | +10 or more: 31%<br>+9 to -9: 50%<br>-10 or more: 19%                                                                                                                                                                                                                                                                                                                                                                                                                                                                                                                                                                                                                                                                                                                                                                                                                                                                                                                                                                                                                                                                                                                                                                                                 |                                                                                                                                                                                                                                                                                                                                                                                                                                                                                                                                                                                                                                                                                                                                                                                                                                                                                                                                                                                                                                                                                                                                                                                                                                      |                                                                                                                                                                                                                                                                                                                                                                                                                                                                                                                                                                                                                                                                                                                                                                                                                                                                                                                                                                                                                                                                                                                                                                                                                                                                                                                                                                                                                                                                                                                                                                                                                                                                                                                                                                                                                                                                                                                                                                                                 |  |                |   |             |         |           |             |         |            |          |         |            |  |               |   |             |                                                       |                       |             |                                                       |           |          |                                                       |  |  |                |   |             |           |                         |             |           |             |          |            |  |  |       |       |   |             |     |     |  |             |     |     |            |
|                                                                                                                                                                                                                | CMT ( $\mu$ m)                                                                                                                                                                                                                                                                                                                                                                                                                                                                                                                                                                                                                                                                                                                                                                                                                                                                                                                                                                                                                                                                                                                                                                                                                                        | p                                                                                                                                                                                                                                                                                                                                                                                                                                                                                                                                                                                                                                                                                                                                                                                                                                                                                                                                                                                                                                                                                                                                                                                                                                    |                                                                                                                                                                                                                                                                                                                                                                                                                                                                                                                                                                                                                                                                                                                                                                                                                                                                                                                                                                                                                                                                                                                                                                                                                                                                                                                                                                                                                                                                                                                                                                                                                                                                                                                                                                                                                                                                                                                                                                                                 |  |                |   |             |         |           |             |         |            |          |         |            |  |               |   |             |                                                       |                       |             |                                                       |           |          |                                                       |  |  |                |   |             |           |                         |             |           |             |          |            |  |  |       |       |   |             |     |     |  |             |     |     |            |
| <i>IVT1</i>                                                                                                                                                                                                    | -86 SD167                                                                                                                                                                                                                                                                                                                                                                                                                                                                                                                                                                                                                                                                                                                                                                                                                                                                                                                                                                                                                                                                                                                                                                                                                                             | <0.001 vs L, NS vs IVT4                                                                                                                                                                                                                                                                                                                                                                                                                                                                                                                                                                                                                                                                                                                                                                                                                                                                                                                                                                                                                                                                                                                                                                                                              |                                                                                                                                                                                                                                                                                                                                                                                                                                                                                                                                                                                                                                                                                                                                                                                                                                                                                                                                                                                                                                                                                                                                                                                                                                                                                                                                                                                                                                                                                                                                                                                                                                                                                                                                                                                                                                                                                                                                                                                                 |  |                |   |             |         |           |             |         |            |          |         |            |  |               |   |             |                                                       |                       |             |                                                       |           |          |                                                       |  |  |                |   |             |           |                         |             |           |             |          |            |  |  |       |       |   |             |     |     |  |             |     |     |            |
| <i>IVT4</i>                                                                                                                                                                                                    | -77 SD160                                                                                                                                                                                                                                                                                                                                                                                                                                                                                                                                                                                                                                                                                                                                                                                                                                                                                                                                                                                                                                                                                                                                                                                                                                             | <0.001 vs L                                                                                                                                                                                                                                                                                                                                                                                                                                                                                                                                                                                                                                                                                                                                                                                                                                                                                                                                                                                                                                                                                                                                                                                                                          |                                                                                                                                                                                                                                                                                                                                                                                                                                                                                                                                                                                                                                                                                                                                                                                                                                                                                                                                                                                                                                                                                                                                                                                                                                                                                                                                                                                                                                                                                                                                                                                                                                                                                                                                                                                                                                                                                                                                                                                                 |  |                |   |             |         |           |             |         |            |          |         |            |  |               |   |             |                                                       |                       |             |                                                       |           |          |                                                       |  |  |                |   |             |           |                         |             |           |             |          |            |  |  |       |       |   |             |     |     |  |             |     |     |            |
| <i>L</i>                                                                                                                                                                                                       | -139 SD148                                                                                                                                                                                                                                                                                                                                                                                                                                                                                                                                                                                                                                                                                                                                                                                                                                                                                                                                                                                                                                                                                                                                                                                                                                            |                                                                                                                                                                                                                                                                                                                                                                                                                                                                                                                                                                                                                                                                                                                                                                                                                                                                                                                                                                                                                                                                                                                                                                                                                                      |                                                                                                                                                                                                                                                                                                                                                                                                                                                                                                                                                                                                                                                                                                                                                                                                                                                                                                                                                                                                                                                                                                                                                                                                                                                                                                                                                                                                                                                                                                                                                                                                                                                                                                                                                                                                                                                                                                                                                                                                 |  |                |   |             |         |           |             |         |            |          |         |            |  |               |   |             |                                                       |                       |             |                                                       |           |          |                                                       |  |  |                |   |             |           |                         |             |           |             |          |            |  |  |       |       |   |             |     |     |  |             |     |     |            |
|                                                                                                                                                                                                                | 2 yrs                                                                                                                                                                                                                                                                                                                                                                                                                                                                                                                                                                                                                                                                                                                                                                                                                                                                                                                                                                                                                                                                                                                                                                                                                                                 | 3 yrs                                                                                                                                                                                                                                                                                                                                                                                                                                                                                                                                                                                                                                                                                                                                                                                                                                                                                                                                                                                                                                                                                                                                                                                                                                | p                                                                                                                                                                                                                                                                                                                                                                                                                                                                                                                                                                                                                                                                                                                                                                                                                                                                                                                                                                                                                                                                                                                                                                                                                                                                                                                                                                                                                                                                                                                                                                                                                                                                                                                                                                                                                                                                                                                                                                                               |  |                |   |             |         |           |             |         |            |          |         |            |  |               |   |             |                                                       |                       |             |                                                       |           |          |                                                       |  |  |                |   |             |           |                         |             |           |             |          |            |  |  |       |       |   |             |     |     |  |             |     |     |            |
| <i>IVT1</i>                                                                                                                                                                                                    | 29%                                                                                                                                                                                                                                                                                                                                                                                                                                                                                                                                                                                                                                                                                                                                                                                                                                                                                                                                                                                                                                                                                                                                                                                                                                                   | 35%                                                                                                                                                                                                                                                                                                                                                                                                                                                                                                                                                                                                                                                                                                                                                                                                                                                                                                                                                                                                                                                                                                                                                                                                                                  |                                                                                                                                                                                                                                                                                                                                                                                                                                                                                                                                                                                                                                                                                                                                                                                                                                                                                                                                                                                                                                                                                                                                                                                                                                                                                                                                                                                                                                                                                                                                                                                                                                                                                                                                                                                                                                                                                                                                                                                                 |  |                |   |             |         |           |             |         |            |          |         |            |  |               |   |             |                                                       |                       |             |                                                       |           |          |                                                       |  |  |                |   |             |           |                         |             |           |             |          |            |  |  |       |       |   |             |     |     |  |             |     |     |            |
| <i>IVT4</i>                                                                                                                                                                                                    | 21%                                                                                                                                                                                                                                                                                                                                                                                                                                                                                                                                                                                                                                                                                                                                                                                                                                                                                                                                                                                                                                                                                                                                                                                                                                                   | 30%                                                                                                                                                                                                                                                                                                                                                                                                                                                                                                                                                                                                                                                                                                                                                                                                                                                                                                                                                                                                                                                                                                                                                                                                                                  | <0.05 vs L                                                                                                                                                                                                                                                                                                                                                                                                                                                                                                                                                                                                                                                                                                                                                                                                                                                                                                                                                                                                                                                                                                                                                                                                                                                                                                                                                                                                                                                                                                                                                                                                                                                                                                                                                                                                                                                                                                                                                                                      |  |                |   |             |         |           |             |         |            |          |         |            |  |               |   |             |                                                       |                       |             |                                                       |           |          |                                                       |  |  |                |   |             |           |                         |             |           |             |          |            |  |  |       |       |   |             |     |     |  |             |     |     |            |

|                                                                                                                                                                                                          |                                                                                                                                                                                                                                                                                                                                                                                                                                                                                                                                                                                                                                                                                                                                                                                                                                                                                                                                                                                                                                                                                           |                                                                                                                                                                                                                                                                                                                                                                                                                                                                                                                                                                                                                                                                                                                                                                      | <i>L</i> 31% 37%                                                                                                                                                                                                                                                                                                                                                                                                                                                                                                                                                                                                                                                                                                                                                                                                                                                                                                                                                                                                                    |  |                |   |             |       |           |          |       |  |  |      |   |              |     |     |           |     |     |              |     |     |  |                       |   |             |      |                                                                         |          |     |  |
|----------------------------------------------------------------------------------------------------------------------------------------------------------------------------------------------------------|-------------------------------------------------------------------------------------------------------------------------------------------------------------------------------------------------------------------------------------------------------------------------------------------------------------------------------------------------------------------------------------------------------------------------------------------------------------------------------------------------------------------------------------------------------------------------------------------------------------------------------------------------------------------------------------------------------------------------------------------------------------------------------------------------------------------------------------------------------------------------------------------------------------------------------------------------------------------------------------------------------------------------------------------------------------------------------------------|----------------------------------------------------------------------------------------------------------------------------------------------------------------------------------------------------------------------------------------------------------------------------------------------------------------------------------------------------------------------------------------------------------------------------------------------------------------------------------------------------------------------------------------------------------------------------------------------------------------------------------------------------------------------------------------------------------------------------------------------------------------------|-------------------------------------------------------------------------------------------------------------------------------------------------------------------------------------------------------------------------------------------------------------------------------------------------------------------------------------------------------------------------------------------------------------------------------------------------------------------------------------------------------------------------------------------------------------------------------------------------------------------------------------------------------------------------------------------------------------------------------------------------------------------------------------------------------------------------------------------------------------------------------------------------------------------------------------------------------------------------------------------------------------------------------------|--|----------------|---|-------------|-------|-----------|----------|-------|--|--|------|---|--------------|-----|-----|-----------|-----|-----|--------------|-----|-----|--|-----------------------|---|-------------|------|-------------------------------------------------------------------------|----------|-----|--|
| <p><b>Gillies 2006 / 2007 / 2009 / Sutter 2004</b> [32,136-138]<br/> <b>Australia</b></p> <p><b>Design:</b> 2-arm placebo-controlled RCT<br/> <b>Follow-up:</b> 2 years, additional 3-year follow-up</p> | <p><b>N:</b> 69 eyes of 43 patients<br/> <b>Inclusion criteria:</b> patients with persistent (<math>\geq 3</math> months after adequate laser treatment) DMO involving the central fovea, BCVA in the affected eye <math>\leq 6/9</math><br/> <b>Exclusion criteria:</b> uncontrolled glaucoma, loss of vision due to other causes, systemic treatment with <math>&gt;5</math> mg prednisolone (or equivalent) daily, intercurrent severe systemic disease, any condition affecting follow-up or documentation<br/> <b>Age:</b> 62.4 to 69.6 SD9.2 to 12.5 years<br/> <b>Sex:</b> 52% female<br/> <b>Diabetes type:</b> not reported<br/> <b>HbA1c:</b> 7.63 to 8.28 SD1.12 to 1.41<br/> <b>Baseline VA:</b> ETDRS letter score 60.5 to 61.3 SD11.9 to 13.2<br/> <b>Baseline CMT:</b> 439 to 444 SD101 to 125 <math>\mu\text{m}</math><br/> <b>Comorbidities:</b> 25% pseudophakic</p>                                                                                                                                                                                                    | <p><b>Group 1 (IVT, n=34 eyes):</b> 4 mg (0.1 ml) IV triamcinolone acetonide (mean 2.6 injections over 2 years)<br/> <b>Group 2 (C, n=35 eyes):</b> placebo injection (subconjunctival saline injection) (mean 1.8 injections over 2 years)<br/> <b>Regimen for all groups:</b> retreatment considered at each visit as long as treatments were at least 6 months apart (retreatment if VA decreased <math>\geq 5</math> letters from previous peak value and persistent CMT <math>&gt;250 \mu\text{m}</math>), if no improvement after 4 weeks, further laser treatment was applied (n=1 laser treatment in intervention group, n=16 in placebo group, p=0.0001)<br/> <b>Laser ETDRS protocol</b></p>                                                               | <p><b>At 2 years</b></p> <p><b>BCVA (ETDRS):</b></p> <table border="1"> <thead> <tr> <th></th> <th>BCVA (letters)</th> <th>p</th> </tr> </thead> <tbody> <tr> <td><i>IVT</i></td> <td>+3.1</td> <td>0.01 vs C</td> </tr> <tr> <td><i>C</i></td> <td>-2.9</td> <td></td> </tr> </tbody> </table> <p><b>CVA gain categories</b></p> <table border="1"> <thead> <tr> <th></th> <th>IVT</th> <th>C</th> </tr> </thead> <tbody> <tr> <td>+10 or more:</td> <td>21%</td> <td>12%</td> </tr> <tr> <td>+9 to -9:</td> <td>70%</td> <td>62%</td> </tr> <tr> <td>-10 or more:</td> <td>9%</td> <td>25%</td> </tr> </tbody> </table> <p><b>CMT (OCT):</b></p> <table border="1"> <thead> <tr> <th></th> <th>CMT (<math>\mu\text{m}</math>)</th> <th>p</th> </tr> </thead> <tbody> <tr> <td><i>IVT</i></td> <td>-125</td> <td>0.009 vs C, difference between groups 59 <math>\mu\text{m}</math> (95% CI 15, 104)</td> </tr> <tr> <td><i>C</i></td> <td>-75</td> <td></td> </tr> </tbody> </table>                                               |  | BCVA (letters) | p | <i>IVT</i>  | +3.1  | 0.01 vs C | <i>C</i> | -2.9  |  |  | IVT  | C | +10 or more: | 21% | 12% | +9 to -9: | 70% | 62% | -10 or more: | 9%  | 25% |  | CMT ( $\mu\text{m}$ ) | p | <i>IVT</i>  | -125 | 0.009 vs C, difference between groups 59 $\mu\text{m}$ (95% CI 15, 104) | <i>C</i> | -75 |  |
|                                                                                                                                                                                                          | BCVA (letters)                                                                                                                                                                                                                                                                                                                                                                                                                                                                                                                                                                                                                                                                                                                                                                                                                                                                                                                                                                                                                                                                            | p                                                                                                                                                                                                                                                                                                                                                                                                                                                                                                                                                                                                                                                                                                                                                                    |                                                                                                                                                                                                                                                                                                                                                                                                                                                                                                                                                                                                                                                                                                                                                                                                                                                                                                                                                                                                                                     |  |                |   |             |       |           |          |       |  |  |      |   |              |     |     |           |     |     |              |     |     |  |                       |   |             |      |                                                                         |          |     |  |
| <i>IVT</i>                                                                                                                                                                                               | +3.1                                                                                                                                                                                                                                                                                                                                                                                                                                                                                                                                                                                                                                                                                                                                                                                                                                                                                                                                                                                                                                                                                      | 0.01 vs C                                                                                                                                                                                                                                                                                                                                                                                                                                                                                                                                                                                                                                                                                                                                                            |                                                                                                                                                                                                                                                                                                                                                                                                                                                                                                                                                                                                                                                                                                                                                                                                                                                                                                                                                                                                                                     |  |                |   |             |       |           |          |       |  |  |      |   |              |     |     |           |     |     |              |     |     |  |                       |   |             |      |                                                                         |          |     |  |
| <i>C</i>                                                                                                                                                                                                 | -2.9                                                                                                                                                                                                                                                                                                                                                                                                                                                                                                                                                                                                                                                                                                                                                                                                                                                                                                                                                                                                                                                                                      |                                                                                                                                                                                                                                                                                                                                                                                                                                                                                                                                                                                                                                                                                                                                                                      |                                                                                                                                                                                                                                                                                                                                                                                                                                                                                                                                                                                                                                                                                                                                                                                                                                                                                                                                                                                                                                     |  |                |   |             |       |           |          |       |  |  |      |   |              |     |     |           |     |     |              |     |     |  |                       |   |             |      |                                                                         |          |     |  |
|                                                                                                                                                                                                          | IVT                                                                                                                                                                                                                                                                                                                                                                                                                                                                                                                                                                                                                                                                                                                                                                                                                                                                                                                                                                                                                                                                                       | C                                                                                                                                                                                                                                                                                                                                                                                                                                                                                                                                                                                                                                                                                                                                                                    |                                                                                                                                                                                                                                                                                                                                                                                                                                                                                                                                                                                                                                                                                                                                                                                                                                                                                                                                                                                                                                     |  |                |   |             |       |           |          |       |  |  |      |   |              |     |     |           |     |     |              |     |     |  |                       |   |             |      |                                                                         |          |     |  |
| +10 or more:                                                                                                                                                                                             | 21%                                                                                                                                                                                                                                                                                                                                                                                                                                                                                                                                                                                                                                                                                                                                                                                                                                                                                                                                                                                                                                                                                       | 12%                                                                                                                                                                                                                                                                                                                                                                                                                                                                                                                                                                                                                                                                                                                                                                  |                                                                                                                                                                                                                                                                                                                                                                                                                                                                                                                                                                                                                                                                                                                                                                                                                                                                                                                                                                                                                                     |  |                |   |             |       |           |          |       |  |  |      |   |              |     |     |           |     |     |              |     |     |  |                       |   |             |      |                                                                         |          |     |  |
| +9 to -9:                                                                                                                                                                                                | 70%                                                                                                                                                                                                                                                                                                                                                                                                                                                                                                                                                                                                                                                                                                                                                                                                                                                                                                                                                                                                                                                                                       | 62%                                                                                                                                                                                                                                                                                                                                                                                                                                                                                                                                                                                                                                                                                                                                                                  |                                                                                                                                                                                                                                                                                                                                                                                                                                                                                                                                                                                                                                                                                                                                                                                                                                                                                                                                                                                                                                     |  |                |   |             |       |           |          |       |  |  |      |   |              |     |     |           |     |     |              |     |     |  |                       |   |             |      |                                                                         |          |     |  |
| -10 or more:                                                                                                                                                                                             | 9%                                                                                                                                                                                                                                                                                                                                                                                                                                                                                                                                                                                                                                                                                                                                                                                                                                                                                                                                                                                                                                                                                        | 25%                                                                                                                                                                                                                                                                                                                                                                                                                                                                                                                                                                                                                                                                                                                                                                  |                                                                                                                                                                                                                                                                                                                                                                                                                                                                                                                                                                                                                                                                                                                                                                                                                                                                                                                                                                                                                                     |  |                |   |             |       |           |          |       |  |  |      |   |              |     |     |           |     |     |              |     |     |  |                       |   |             |      |                                                                         |          |     |  |
|                                                                                                                                                                                                          | CMT ( $\mu\text{m}$ )                                                                                                                                                                                                                                                                                                                                                                                                                                                                                                                                                                                                                                                                                                                                                                                                                                                                                                                                                                                                                                                                     | p                                                                                                                                                                                                                                                                                                                                                                                                                                                                                                                                                                                                                                                                                                                                                                    |                                                                                                                                                                                                                                                                                                                                                                                                                                                                                                                                                                                                                                                                                                                                                                                                                                                                                                                                                                                                                                     |  |                |   |             |       |           |          |       |  |  |      |   |              |     |     |           |     |     |              |     |     |  |                       |   |             |      |                                                                         |          |     |  |
| <i>IVT</i>                                                                                                                                                                                               | -125                                                                                                                                                                                                                                                                                                                                                                                                                                                                                                                                                                                                                                                                                                                                                                                                                                                                                                                                                                                                                                                                                      | 0.009 vs C, difference between groups 59 $\mu\text{m}$ (95% CI 15, 104)                                                                                                                                                                                                                                                                                                                                                                                                                                                                                                                                                                                                                                                                                              |                                                                                                                                                                                                                                                                                                                                                                                                                                                                                                                                                                                                                                                                                                                                                                                                                                                                                                                                                                                                                                     |  |                |   |             |       |           |          |       |  |  |      |   |              |     |     |           |     |     |              |     |     |  |                       |   |             |      |                                                                         |          |     |  |
| <i>C</i>                                                                                                                                                                                                 | -75                                                                                                                                                                                                                                                                                                                                                                                                                                                                                                                                                                                                                                                                                                                                                                                                                                                                                                                                                                                                                                                                                       |                                                                                                                                                                                                                                                                                                                                                                                                                                                                                                                                                                                                                                                                                                                                                                      |                                                                                                                                                                                                                                                                                                                                                                                                                                                                                                                                                                                                                                                                                                                                                                                                                                                                                                                                                                                                                                     |  |                |   |             |       |           |          |       |  |  |      |   |              |     |     |           |     |     |              |     |     |  |                       |   |             |      |                                                                         |          |     |  |
| <p><b>Gillies 2011</b>[33]<br/> <b>Australia</b></p> <p><b>Design:</b> 2-arm RCT<br/> <b>Follow-up:</b> 24 months</p>                                                                                    | <p><b>N:</b> 84 eyes of 54 patients<br/> <b>Inclusion criteria:</b> DMO involving the central fovea, CMT <math>\geq 250 \mu\text{m}</math>, BCVA 17 to 70 letters (~20/40 to 20/400), laser treatment could be safely delayed for 6 weeks without significant adverse effects<br/> <b>Exclusion criteria:</b> uncontrolled glaucoma, controlled glaucoma but with a glaucomatous visual field defect, loss of vision resulting from other causes, systemic treatment with <math>&gt;5</math> mg prednisolone (or equivalent) daily, retinal laser treatment within 4 months, intraocular surgery within 6 months, concurrent severe systemic disease, any condition affecting follow-up or documentation<br/> <b>Age:</b> 65.4 to 66.9 SD8.9 to 9.5 years<br/> <b>Sex:</b> 38.1 to 47.6% female<br/> <b>Diabetes type:</b> not reported<br/> <b>HbA1c:</b> 7.81 to 8.02 SD1.44 to 1.63 %<br/> <b>Baseline VA:</b> letter score 55.2 to 55.5 SD11.3 to 12.5<br/> <b>Baseline CMT:</b> 482.1 to 477.4 SD122.7 to 155.5 <math>\mu\text{m}</math><br/> <b>Comorbidities:</b> not reported</p> | <p><b>Group 1 (IVTL, n=42 eyes):</b> 4 mg (0.1 ml) IV triamcinolone acetonide followed by laser treatment (at least 1 retreatment in 2<sup>nd</sup> year in 69%)<br/> <b>Group 2 (L, n=42 eyes):</b> sham injection followed by laser treatment (at least 1 retreatment in 2<sup>nd</sup> year in 45%)<br/> <b>Regimen for all groups:</b> retreatment with injection followed by laser at discretion of chief investigator, with at least 6 weeks between treatments; no retreatment if: (1) investigator considered the macula nearly flat and CMT <math>&lt;300 \mu\text{m}</math>; (2) VA was <math>\geq 79</math> letters (20/25) or VA had improved by <math>\geq 5</math> letters compared with the best VA after treatment or baseline acuity; (3) laser</p> | <p><b>At 24 months</b></p> <p><b>BCVA (ETDRS):</b></p> <table border="1"> <thead> <tr> <th></th> <th>BCVA (letters)</th> <th>p</th> </tr> </thead> <tbody> <tr> <td><i>I TL</i></td> <td>+0.76</td> <td>NS vs L</td> </tr> <tr> <td><i>L</i></td> <td>-1.49</td> <td></td> </tr> </tbody> </table> <p><b>BCVA gain categories</b></p> <table border="1"> <thead> <tr> <th></th> <th>IVTL</th> <th>L</th> </tr> </thead> <tbody> <tr> <td>+10 or more:</td> <td>36%</td> <td>17%</td> </tr> <tr> <td>+9 to -9:</td> <td>31%</td> <td>59%</td> </tr> <tr> <td>-10 or more:</td> <td>33%</td> <td>24%</td> </tr> </tbody> </table> <p>Subgroups:</p> <ul style="list-style-type: none"> <li>BCVA outcome not significantly affected by cataract surgery</li> </ul> <p><b>CMT (OCT):</b></p> <table border="1"> <thead> <tr> <th></th> <th>CMT (<math>\mu\text{m}</math>)</th> <th>p</th> </tr> </thead> <tbody> <tr> <td><i>I TL</i></td> <td></td> <td></td> </tr> <tr> <td><i>L</i></td> <td></td> <td></td> </tr> </tbody> </table> |  | BCVA (letters) | p | <i>I TL</i> | +0.76 | NS vs L   | <i>L</i> | -1.49 |  |  | IVTL | L | +10 or more: | 36% | 17% | +9 to -9: | 31% | 59% | -10 or more: | 33% | 24% |  | CMT ( $\mu\text{m}$ ) | p | <i>I TL</i> |      |                                                                         | <i>L</i> |     |  |
|                                                                                                                                                                                                          | BCVA (letters)                                                                                                                                                                                                                                                                                                                                                                                                                                                                                                                                                                                                                                                                                                                                                                                                                                                                                                                                                                                                                                                                            | p                                                                                                                                                                                                                                                                                                                                                                                                                                                                                                                                                                                                                                                                                                                                                                    |                                                                                                                                                                                                                                                                                                                                                                                                                                                                                                                                                                                                                                                                                                                                                                                                                                                                                                                                                                                                                                     |  |                |   |             |       |           |          |       |  |  |      |   |              |     |     |           |     |     |              |     |     |  |                       |   |             |      |                                                                         |          |     |  |
| <i>I TL</i>                                                                                                                                                                                              | +0.76                                                                                                                                                                                                                                                                                                                                                                                                                                                                                                                                                                                                                                                                                                                                                                                                                                                                                                                                                                                                                                                                                     | NS vs L                                                                                                                                                                                                                                                                                                                                                                                                                                                                                                                                                                                                                                                                                                                                                              |                                                                                                                                                                                                                                                                                                                                                                                                                                                                                                                                                                                                                                                                                                                                                                                                                                                                                                                                                                                                                                     |  |                |   |             |       |           |          |       |  |  |      |   |              |     |     |           |     |     |              |     |     |  |                       |   |             |      |                                                                         |          |     |  |
| <i>L</i>                                                                                                                                                                                                 | -1.49                                                                                                                                                                                                                                                                                                                                                                                                                                                                                                                                                                                                                                                                                                                                                                                                                                                                                                                                                                                                                                                                                     |                                                                                                                                                                                                                                                                                                                                                                                                                                                                                                                                                                                                                                                                                                                                                                      |                                                                                                                                                                                                                                                                                                                                                                                                                                                                                                                                                                                                                                                                                                                                                                                                                                                                                                                                                                                                                                     |  |                |   |             |       |           |          |       |  |  |      |   |              |     |     |           |     |     |              |     |     |  |                       |   |             |      |                                                                         |          |     |  |
|                                                                                                                                                                                                          | IVTL                                                                                                                                                                                                                                                                                                                                                                                                                                                                                                                                                                                                                                                                                                                                                                                                                                                                                                                                                                                                                                                                                      | L                                                                                                                                                                                                                                                                                                                                                                                                                                                                                                                                                                                                                                                                                                                                                                    |                                                                                                                                                                                                                                                                                                                                                                                                                                                                                                                                                                                                                                                                                                                                                                                                                                                                                                                                                                                                                                     |  |                |   |             |       |           |          |       |  |  |      |   |              |     |     |           |     |     |              |     |     |  |                       |   |             |      |                                                                         |          |     |  |
| +10 or more:                                                                                                                                                                                             | 36%                                                                                                                                                                                                                                                                                                                                                                                                                                                                                                                                                                                                                                                                                                                                                                                                                                                                                                                                                                                                                                                                                       | 17%                                                                                                                                                                                                                                                                                                                                                                                                                                                                                                                                                                                                                                                                                                                                                                  |                                                                                                                                                                                                                                                                                                                                                                                                                                                                                                                                                                                                                                                                                                                                                                                                                                                                                                                                                                                                                                     |  |                |   |             |       |           |          |       |  |  |      |   |              |     |     |           |     |     |              |     |     |  |                       |   |             |      |                                                                         |          |     |  |
| +9 to -9:                                                                                                                                                                                                | 31%                                                                                                                                                                                                                                                                                                                                                                                                                                                                                                                                                                                                                                                                                                                                                                                                                                                                                                                                                                                                                                                                                       | 59%                                                                                                                                                                                                                                                                                                                                                                                                                                                                                                                                                                                                                                                                                                                                                                  |                                                                                                                                                                                                                                                                                                                                                                                                                                                                                                                                                                                                                                                                                                                                                                                                                                                                                                                                                                                                                                     |  |                |   |             |       |           |          |       |  |  |      |   |              |     |     |           |     |     |              |     |     |  |                       |   |             |      |                                                                         |          |     |  |
| -10 or more:                                                                                                                                                                                             | 33%                                                                                                                                                                                                                                                                                                                                                                                                                                                                                                                                                                                                                                                                                                                                                                                                                                                                                                                                                                                                                                                                                       | 24%                                                                                                                                                                                                                                                                                                                                                                                                                                                                                                                                                                                                                                                                                                                                                                  |                                                                                                                                                                                                                                                                                                                                                                                                                                                                                                                                                                                                                                                                                                                                                                                                                                                                                                                                                                                                                                     |  |                |   |             |       |           |          |       |  |  |      |   |              |     |     |           |     |     |              |     |     |  |                       |   |             |      |                                                                         |          |     |  |
|                                                                                                                                                                                                          | CMT ( $\mu\text{m}$ )                                                                                                                                                                                                                                                                                                                                                                                                                                                                                                                                                                                                                                                                                                                                                                                                                                                                                                                                                                                                                                                                     | p                                                                                                                                                                                                                                                                                                                                                                                                                                                                                                                                                                                                                                                                                                                                                                    |                                                                                                                                                                                                                                                                                                                                                                                                                                                                                                                                                                                                                                                                                                                                                                                                                                                                                                                                                                                                                                     |  |                |   |             |       |           |          |       |  |  |      |   |              |     |     |           |     |     |              |     |     |  |                       |   |             |      |                                                                         |          |     |  |
| <i>I TL</i>                                                                                                                                                                                              |                                                                                                                                                                                                                                                                                                                                                                                                                                                                                                                                                                                                                                                                                                                                                                                                                                                                                                                                                                                                                                                                                           |                                                                                                                                                                                                                                                                                                                                                                                                                                                                                                                                                                                                                                                                                                                                                                      |                                                                                                                                                                                                                                                                                                                                                                                                                                                                                                                                                                                                                                                                                                                                                                                                                                                                                                                                                                                                                                     |  |                |   |             |       |           |          |       |  |  |      |   |              |     |     |           |     |     |              |     |     |  |                       |   |             |      |                                                                         |          |     |  |
| <i>L</i>                                                                                                                                                                                                 |                                                                                                                                                                                                                                                                                                                                                                                                                                                                                                                                                                                                                                                                                                                                                                                                                                                                                                                                                                                                                                                                                           |                                                                                                                                                                                                                                                                                                                                                                                                                                                                                                                                                                                                                                                                                                                                                                      |                                                                                                                                                                                                                                                                                                                                                                                                                                                                                                                                                                                                                                                                                                                                                                                                                                                                                                                                                                                                                                     |  |                |   |             |       |           |          |       |  |  |      |   |              |     |     |           |     |     |              |     |     |  |                       |   |             |      |                                                                         |          |     |  |

1  
2  
3  
4  
5  
6  
7  
8  
9  
10  
11  
12  
13  
14  
15  
16  
17  
18  
19  
20  
21  
22  
23  
24  
25  
26  
27  
28  
29  
30  
31  
32  
33  
34  
35  
36  
37  
38  
39  
40  
41  
42  
43  
44  
45  
46  
47  
48  
49

|                                                                                                                                  |                                                                                                                                                                                                                                                                                                                                                                                                                                                                                                                                                                                                                                                                                                                                                                                                                       | treatment was considered by the investigator as inappropriate or had no potential for improvement                                                                                                                                                                                                                                                                                                                                                                                                                                                                                                                                                               | <table border="1"> <tr> <td><i>IVTL</i></td> <td>-137.1</td> <td>NS vs L</td> </tr> <tr> <td><i>L</i></td> <td>-109.6</td> <td></td> </tr> </table>                                                                                                                                                                                                                                                                                                                                                                                                                                                                                                                                                                                                                                                                                                                                      | <i>IVTL</i> | -137.1            | NS vs L | <i>L</i>   | -109.6                                    |                   |             |                                           |              |                             |                                           |  |            |              |   |             |                 |                                      |             |                  |                   |          |                 |  |
|----------------------------------------------------------------------------------------------------------------------------------|-----------------------------------------------------------------------------------------------------------------------------------------------------------------------------------------------------------------------------------------------------------------------------------------------------------------------------------------------------------------------------------------------------------------------------------------------------------------------------------------------------------------------------------------------------------------------------------------------------------------------------------------------------------------------------------------------------------------------------------------------------------------------------------------------------------------------|-----------------------------------------------------------------------------------------------------------------------------------------------------------------------------------------------------------------------------------------------------------------------------------------------------------------------------------------------------------------------------------------------------------------------------------------------------------------------------------------------------------------------------------------------------------------------------------------------------------------------------------------------------------------|------------------------------------------------------------------------------------------------------------------------------------------------------------------------------------------------------------------------------------------------------------------------------------------------------------------------------------------------------------------------------------------------------------------------------------------------------------------------------------------------------------------------------------------------------------------------------------------------------------------------------------------------------------------------------------------------------------------------------------------------------------------------------------------------------------------------------------------------------------------------------------------|-------------|-------------------|---------|------------|-------------------------------------------|-------------------|-------------|-------------------------------------------|--------------|-----------------------------|-------------------------------------------|--|------------|--------------|---|-------------|-----------------|--------------------------------------|-------------|------------------|-------------------|----------|-----------------|--|
| <i>IVTL</i>                                                                                                                      | -137.1                                                                                                                                                                                                                                                                                                                                                                                                                                                                                                                                                                                                                                                                                                                                                                                                                | NS vs L                                                                                                                                                                                                                                                                                                                                                                                                                                                                                                                                                                                                                                                         |                                                                                                                                                                                                                                                                                                                                                                                                                                                                                                                                                                                                                                                                                                                                                                                                                                                                                          |             |                   |         |            |                                           |                   |             |                                           |              |                             |                                           |  |            |              |   |             |                 |                                      |             |                  |                   |          |                 |  |
| <i>L</i>                                                                                                                         | -109.6                                                                                                                                                                                                                                                                                                                                                                                                                                                                                                                                                                                                                                                                                                                                                                                                                |                                                                                                                                                                                                                                                                                                                                                                                                                                                                                                                                                                                                                                                                 |                                                                                                                                                                                                                                                                                                                                                                                                                                                                                                                                                                                                                                                                                                                                                                                                                                                                                          |             |                   |         |            |                                           |                   |             |                                           |              |                             |                                           |  |            |              |   |             |                 |                                      |             |                  |                   |          |                 |  |
| <p><b>Kim 2010</b>[45]<br/><b>Korea</b></p> <p><b>Design:</b> 2-arm RCT<br/><b>Follow-up:</b> 3 years</p>                        | <p>N: 86 eyes of 75 patients<br/><b>Inclusion criteria:</b> diffuse DMO<br/><b>Exclusion criteria:</b> not reported<br/><b>Age:</b> not reported<br/><b>Sex:</b> not reported<br/><b>Diabetes type:</b> not reported<br/><b>HbA1c:</b> not reported<br/><b>Baseline VA:</b> not reported<br/><b>Baseline CMT:</b> not reported<br/><b>Comorbidities:</b> not reported</p>                                                                                                                                                                                                                                                                                                                                                                                                                                             | <p><b>Group 1 (IVT, n=38 eyes):</b> 4 mg IV triamcinolone (1.88 additional treatments, completion 68.1%)<br/><b>Group 2 (IVTL, n=48 eyes):</b> macular laser photocoagulation 4 weeks after 4 mg IV triamcinolone (0.92 additional treatments, completion 77.1%)<br/><b>Regimen for all groups:</b> additional treatment possible, criteria not mentioned<br/><b>Laser protocol</b> not reported</p>                                                                                                                                                                                                                                                            | <p><b>At 3 years</b><br/><b>BCVA:</b> not reported</p> <p><b>Outcomes related to DMO:</b></p> <table border="1"> <thead> <tr> <th></th> <th>no DMO recurrence</th> <th>p</th> </tr> </thead> <tbody> <tr> <td><i>IVT</i></td> <td>3.9%</td> <td></td> </tr> <tr> <td><i>IVTL</i></td> <td>24.3%</td> <td>0.028 vs IVT</td> </tr> <tr> <td colspan="3"><b>time DMO not present</b></td> </tr> <tr> <td><i>IVT</i></td> <td>10.33 months</td> <td></td> </tr> <tr> <td><i>IVTL</i></td> <td>19.88 months</td> <td>0.027 vs IVT</td> </tr> </tbody> </table>                                                                                                                                                                                                                                                                                                                                |             | no DMO recurrence | p       | <i>IVT</i> | 3.9%                                      |                   | <i>IVTL</i> | 24.3%                                     | 0.028 vs IVT | <b>time DMO not present</b> |                                           |  | <i>IVT</i> | 10.33 months |   | <i>IVTL</i> | 19.88 months    | 0.027 vs IVT                         |             |                  |                   |          |                 |  |
|                                                                                                                                  | no DMO recurrence                                                                                                                                                                                                                                                                                                                                                                                                                                                                                                                                                                                                                                                                                                                                                                                                     | p                                                                                                                                                                                                                                                                                                                                                                                                                                                                                                                                                                                                                                                               |                                                                                                                                                                                                                                                                                                                                                                                                                                                                                                                                                                                                                                                                                                                                                                                                                                                                                          |             |                   |         |            |                                           |                   |             |                                           |              |                             |                                           |  |            |              |   |             |                 |                                      |             |                  |                   |          |                 |  |
| <i>IVT</i>                                                                                                                       | 3.9%                                                                                                                                                                                                                                                                                                                                                                                                                                                                                                                                                                                                                                                                                                                                                                                                                  |                                                                                                                                                                                                                                                                                                                                                                                                                                                                                                                                                                                                                                                                 |                                                                                                                                                                                                                                                                                                                                                                                                                                                                                                                                                                                                                                                                                                                                                                                                                                                                                          |             |                   |         |            |                                           |                   |             |                                           |              |                             |                                           |  |            |              |   |             |                 |                                      |             |                  |                   |          |                 |  |
| <i>IVTL</i>                                                                                                                      | 24.3%                                                                                                                                                                                                                                                                                                                                                                                                                                                                                                                                                                                                                                                                                                                                                                                                                 | 0.028 vs IVT                                                                                                                                                                                                                                                                                                                                                                                                                                                                                                                                                                                                                                                    |                                                                                                                                                                                                                                                                                                                                                                                                                                                                                                                                                                                                                                                                                                                                                                                                                                                                                          |             |                   |         |            |                                           |                   |             |                                           |              |                             |                                           |  |            |              |   |             |                 |                                      |             |                  |                   |          |                 |  |
| <b>time DMO not present</b>                                                                                                      |                                                                                                                                                                                                                                                                                                                                                                                                                                                                                                                                                                                                                                                                                                                                                                                                                       |                                                                                                                                                                                                                                                                                                                                                                                                                                                                                                                                                                                                                                                                 |                                                                                                                                                                                                                                                                                                                                                                                                                                                                                                                                                                                                                                                                                                                                                                                                                                                                                          |             |                   |         |            |                                           |                   |             |                                           |              |                             |                                           |  |            |              |   |             |                 |                                      |             |                  |                   |          |                 |  |
| <i>IVT</i>                                                                                                                       | 10.33 months                                                                                                                                                                                                                                                                                                                                                                                                                                                                                                                                                                                                                                                                                                                                                                                                          |                                                                                                                                                                                                                                                                                                                                                                                                                                                                                                                                                                                                                                                                 |                                                                                                                                                                                                                                                                                                                                                                                                                                                                                                                                                                                                                                                                                                                                                                                                                                                                                          |             |                   |         |            |                                           |                   |             |                                           |              |                             |                                           |  |            |              |   |             |                 |                                      |             |                  |                   |          |                 |  |
| <i>IVTL</i>                                                                                                                      | 19.88 months                                                                                                                                                                                                                                                                                                                                                                                                                                                                                                                                                                                                                                                                                                                                                                                                          | 0.027 vs IVT                                                                                                                                                                                                                                                                                                                                                                                                                                                                                                                                                                                                                                                    |                                                                                                                                                                                                                                                                                                                                                                                                                                                                                                                                                                                                                                                                                                                                                                                                                                                                                          |             |                   |         |            |                                           |                   |             |                                           |              |                             |                                           |  |            |              |   |             |                 |                                      |             |                  |                   |          |                 |  |
| <p><b>Lam 2007</b>[34]<br/><b>Hong Kong</b></p> <p><b>Design:</b> 3-arm RCT<br/><b>Follow-up:</b> 6 months (2 years planned)</p> | <p>N: 111 eyes of 111 patients<br/><b>Inclusion criteria:</b> &gt;18 years, type 1 or 2 DM, clinically significant DMO (ETDRS), CMT ≥250 μm<br/><b>Exclusion criteria:</b> macular oedema due to causes other than diabetic maculopathy, signs of vitreomacular traction, proliferative diabetic retinopathy, aphakia, history of glaucoma or ocular hypertension, macular ischemia, any laser procedure within 3 months, ocular surgery within 6 months, significant media opacities<br/><b>Age:</b> 64.7 to 67.2 SD8.2 to 10.3 years<br/><b>Sex:</b> 42 to 59% female<br/><b>Diabetes type:</b> not reported<br/><b>HbA1c:</b> not reported<br/><b>Baseline VA:</b> ETDRS logMAR 0.64 to 0.72 SD0.34 to 0.36<br/><b>Baseline CMT:</b> 385 to 424 SD91 to 108 μm<br/><b>Comorbidities:</b> 66 to 84% phakic eyes</p> | <p><b>Group 1 (IVT, n=38 eyes):</b> 4 mg IV triamcinolone (no retreatments)<br/><b>Group 2 (IVTL, n=36 eyes):</b> 4 mg IV triamcinolone followed by grid laser photocoagulation (ETDRS) (laser treatment once the macular oedema had reduced to &lt;250 μm at the foveal center or at 1 to 2 months after injection, whichever was earlier)<br/><b>Group 3 (L, n=37 eyes):</b> grid laser photocoagulation (n=3 retreatments) (no retreatments)<br/><b>Regimen for all groups:</b> in case of recurrence or persistence of macular oedema, retreatment offered according to study group, at intervals no less than 4 months<br/><b>Laser</b> ETDRS protocol</p> | <p><b>At 6 months</b><br/><b>BCVA (ETDRS):</b></p> <table border="1"> <thead> <tr> <th></th> <th>BCVA improvement</th> <th>p</th> </tr> </thead> <tbody> <tr> <td><i>IVT</i></td> <td>-0.7 SD 10.7 log MAR plus ≥15 letters: 5%</td> <td>NS between groups</td> </tr> <tr> <td><i>IVTL</i></td> <td>-1.1 SD 10.8 log MAR plus ≥15 letters: 3%</td> <td></td> </tr> <tr> <td><i>L</i></td> <td>-1.6 SD 11.5 log MAR plus ≥15 letters: 5%</td> <td></td> </tr> </tbody> </table> <p><b>CMT (OCT):</b></p> <table border="1"> <thead> <tr> <th></th> <th>CMT (μm)</th> <th>p</th> </tr> </thead> <tbody> <tr> <td><i>IVT</i></td> <td>342 SD124 [-54]</td> <td>NS between groups, &lt;0.01 vs baseline</td> </tr> <tr> <td><i>IVTL</i></td> <td>307 SD181 [-116]</td> <td>&lt;0.01 vs baseline</td> </tr> <tr> <td><i>L</i></td> <td>350 SD169 [-35]</td> <td></td> </tr> </tbody> </table> |             | BCVA improvement  | p       | <i>IVT</i> | -0.7 SD 10.7 log MAR plus ≥15 letters: 5% | NS between groups | <i>IVTL</i> | -1.1 SD 10.8 log MAR plus ≥15 letters: 3% |              | <i>L</i>                    | -1.6 SD 11.5 log MAR plus ≥15 letters: 5% |  |            | CMT (μm)     | p | <i>IVT</i>  | 342 SD124 [-54] | NS between groups, <0.01 vs baseline | <i>IVTL</i> | 307 SD181 [-116] | <0.01 vs baseline | <i>L</i> | 350 SD169 [-35] |  |
|                                                                                                                                  | BCVA improvement                                                                                                                                                                                                                                                                                                                                                                                                                                                                                                                                                                                                                                                                                                                                                                                                      | p                                                                                                                                                                                                                                                                                                                                                                                                                                                                                                                                                                                                                                                               |                                                                                                                                                                                                                                                                                                                                                                                                                                                                                                                                                                                                                                                                                                                                                                                                                                                                                          |             |                   |         |            |                                           |                   |             |                                           |              |                             |                                           |  |            |              |   |             |                 |                                      |             |                  |                   |          |                 |  |
| <i>IVT</i>                                                                                                                       | -0.7 SD 10.7 log MAR plus ≥15 letters: 5%                                                                                                                                                                                                                                                                                                                                                                                                                                                                                                                                                                                                                                                                                                                                                                             | NS between groups                                                                                                                                                                                                                                                                                                                                                                                                                                                                                                                                                                                                                                               |                                                                                                                                                                                                                                                                                                                                                                                                                                                                                                                                                                                                                                                                                                                                                                                                                                                                                          |             |                   |         |            |                                           |                   |             |                                           |              |                             |                                           |  |            |              |   |             |                 |                                      |             |                  |                   |          |                 |  |
| <i>IVTL</i>                                                                                                                      | -1.1 SD 10.8 log MAR plus ≥15 letters: 3%                                                                                                                                                                                                                                                                                                                                                                                                                                                                                                                                                                                                                                                                                                                                                                             |                                                                                                                                                                                                                                                                                                                                                                                                                                                                                                                                                                                                                                                                 |                                                                                                                                                                                                                                                                                                                                                                                                                                                                                                                                                                                                                                                                                                                                                                                                                                                                                          |             |                   |         |            |                                           |                   |             |                                           |              |                             |                                           |  |            |              |   |             |                 |                                      |             |                  |                   |          |                 |  |
| <i>L</i>                                                                                                                         | -1.6 SD 11.5 log MAR plus ≥15 letters: 5%                                                                                                                                                                                                                                                                                                                                                                                                                                                                                                                                                                                                                                                                                                                                                                             |                                                                                                                                                                                                                                                                                                                                                                                                                                                                                                                                                                                                                                                                 |                                                                                                                                                                                                                                                                                                                                                                                                                                                                                                                                                                                                                                                                                                                                                                                                                                                                                          |             |                   |         |            |                                           |                   |             |                                           |              |                             |                                           |  |            |              |   |             |                 |                                      |             |                  |                   |          |                 |  |
|                                                                                                                                  | CMT (μm)                                                                                                                                                                                                                                                                                                                                                                                                                                                                                                                                                                                                                                                                                                                                                                                                              | p                                                                                                                                                                                                                                                                                                                                                                                                                                                                                                                                                                                                                                                               |                                                                                                                                                                                                                                                                                                                                                                                                                                                                                                                                                                                                                                                                                                                                                                                                                                                                                          |             |                   |         |            |                                           |                   |             |                                           |              |                             |                                           |  |            |              |   |             |                 |                                      |             |                  |                   |          |                 |  |
| <i>IVT</i>                                                                                                                       | 342 SD124 [-54]                                                                                                                                                                                                                                                                                                                                                                                                                                                                                                                                                                                                                                                                                                                                                                                                       | NS between groups, <0.01 vs baseline                                                                                                                                                                                                                                                                                                                                                                                                                                                                                                                                                                                                                            |                                                                                                                                                                                                                                                                                                                                                                                                                                                                                                                                                                                                                                                                                                                                                                                                                                                                                          |             |                   |         |            |                                           |                   |             |                                           |              |                             |                                           |  |            |              |   |             |                 |                                      |             |                  |                   |          |                 |  |
| <i>IVTL</i>                                                                                                                      | 307 SD181 [-116]                                                                                                                                                                                                                                                                                                                                                                                                                                                                                                                                                                                                                                                                                                                                                                                                      | <0.01 vs baseline                                                                                                                                                                                                                                                                                                                                                                                                                                                                                                                                                                                                                                               |                                                                                                                                                                                                                                                                                                                                                                                                                                                                                                                                                                                                                                                                                                                                                                                                                                                                                          |             |                   |         |            |                                           |                   |             |                                           |              |                             |                                           |  |            |              |   |             |                 |                                      |             |                  |                   |          |                 |  |
| <i>L</i>                                                                                                                         | 350 SD169 [-35]                                                                                                                                                                                                                                                                                                                                                                                                                                                                                                                                                                                                                                                                                                                                                                                                       |                                                                                                                                                                                                                                                                                                                                                                                                                                                                                                                                                                                                                                                                 |                                                                                                                                                                                                                                                                                                                                                                                                                                                                                                                                                                                                                                                                                                                                                                                                                                                                                          |             |                   |         |            |                                           |                   |             |                                           |              |                             |                                           |  |            |              |   |             |                 |                                      |             |                  |                   |          |                 |  |

1  
2  
3  
4  
5  
6  
7  
8  
9  
10  
11  
12  
13  
14  
15  
16  
17  
18  
19  
20  
21  
22  
23  
24  
25  
26  
27  
28  
29  
30  
31  
32  
33  
34  
35  
36  
37  
38  
39  
40  
41  
42  
43  
44  
45  
46  
47  
48  
49

| <p><b>Ockrim 2008 / Sivaprasad 2008</b><br/>[42,62]<br/><b>UK</b></p> <p><b>Design:</b> 2-arm RCT<br/><b>Follow-up:</b> 1 year</p> | <p><b>N:</b> 88 eyes of 88 patients<br/><b>Inclusion criteria:</b> clinically significant DMO persisting ≥4 months, ≥1 previous laser treatment, BCVA 6/12 to 3/60, VA in fellow eye ≥3/60, duration visual loss &lt;24 months<br/><b>Exclusion criteria:</b> significant macular ischemia, baseline IO &gt;23 mmHg, glaucoma, coexistent renal disease, loss of VA due to other causes, previous vitrectomy, intraocular surgery within 3 months of study entry, previous inclusion in other DR trials, inability to return to follow-up, inability to give informed consent<br/><b>Age:</b> 62.3 to 64.8 SD7.5 to 10.1 years<br/><b>Sex:</b> 28.9 to 34.9% female<br/><b>Diabetes type:</b> 97.8 to 100% type 2 DM<br/><b>HbA1c:</b> 7 to 7.8 IQR6.5 to 8.7%<br/><b>Baseline VA:</b> ETDRS letter score 53.0 to 54.6 SD13.3 to 14.2<br/><b>Baseline CMT:</b> 410.4 to 413.4 SD127.8 to 134.1 μm<br/><b>Comorbidities:</b> 17.8 to 19.5% PDR, 13.3 to 18.6% pseudophakia, 15 to 17.8% posterior vitreous detachment</p> | <p><b>Group 1 (IVT, n=43 eyes):</b> 4 mg IV triamcinolone (mean number of IVT injections 1.8 (range 1 to 3))<br/><b>Group 2 (L, n=45 eyes):</b> ETDRS laser photocoagulation (mean number of grid laser sessions 2.1 (range 1 to 3))<br/><b>Regimen for all groups:</b> patients retreated at 4 and 8 months if they had persistent macular oedema<br/><b>Laser ETDRS protocol</b></p> | <p><b>At 12 months</b></p> <p><b>BCVA (ETDRS):</b></p> <table border="1"> <thead> <tr> <th></th> <th>BCVA (letters)</th> <th>p</th> </tr> </thead> <tbody> <tr> <td><i>IVT</i></td> <td>-0.2</td> <td>NS vs L</td> </tr> <tr> <td><i>L</i></td> <td>+1.7</td> <td></td> </tr> <tr> <th colspan="3">plus ≥15 letters</th> </tr> <tr> <td><i>IVT</i></td> <td>4.8%</td> <td>NS vs L</td> </tr> <tr> <td><i>L</i></td> <td>12.2%</td> <td></td> </tr> </tbody> </table> <p><b>CMT (optical coherence tomography):</b></p> <table border="1"> <thead> <tr> <th></th> <th>CMT (μm)</th> <th>p</th> </tr> </thead> <tbody> <tr> <td><i>IVT</i></td> <td>-91.3</td> <td>NS vs L</td> </tr> <tr> <td><i>L</i></td> <td>-63.7</td> <td></td> </tr> </tbody> </table> |  | BCVA (letters) | p | <i>IVT</i> | -0.2 | NS vs L | <i>L</i> | +1.7 |  | plus ≥15 letters |  |  | <i>IVT</i> | 4.8% | NS vs L | <i>L</i> | 12.2% |  |  | CMT (μm) | p | <i>IVT</i> | -91.3 | NS vs L | <i>L</i> | -63.7 |  |
|------------------------------------------------------------------------------------------------------------------------------------|--------------------------------------------------------------------------------------------------------------------------------------------------------------------------------------------------------------------------------------------------------------------------------------------------------------------------------------------------------------------------------------------------------------------------------------------------------------------------------------------------------------------------------------------------------------------------------------------------------------------------------------------------------------------------------------------------------------------------------------------------------------------------------------------------------------------------------------------------------------------------------------------------------------------------------------------------------------------------------------------------------------------------|----------------------------------------------------------------------------------------------------------------------------------------------------------------------------------------------------------------------------------------------------------------------------------------------------------------------------------------------------------------------------------------|-------------------------------------------------------------------------------------------------------------------------------------------------------------------------------------------------------------------------------------------------------------------------------------------------------------------------------------------------------------------------------------------------------------------------------------------------------------------------------------------------------------------------------------------------------------------------------------------------------------------------------------------------------------------------------------------------------------------------------------------------------------|--|----------------|---|------------|------|---------|----------|------|--|------------------|--|--|------------|------|---------|----------|-------|--|--|----------|---|------------|-------|---------|----------|-------|--|
|                                                                                                                                    | BCVA (letters)                                                                                                                                                                                                                                                                                                                                                                                                                                                                                                                                                                                                                                                                                                                                                                                                                                                                                                                                                                                                           | p                                                                                                                                                                                                                                                                                                                                                                                      |                                                                                                                                                                                                                                                                                                                                                                                                                                                                                                                                                                                                                                                                                                                                                             |  |                |   |            |      |         |          |      |  |                  |  |  |            |      |         |          |       |  |  |          |   |            |       |         |          |       |  |
| <i>IVT</i>                                                                                                                         | -0.2                                                                                                                                                                                                                                                                                                                                                                                                                                                                                                                                                                                                                                                                                                                                                                                                                                                                                                                                                                                                                     | NS vs L                                                                                                                                                                                                                                                                                                                                                                                |                                                                                                                                                                                                                                                                                                                                                                                                                                                                                                                                                                                                                                                                                                                                                             |  |                |   |            |      |         |          |      |  |                  |  |  |            |      |         |          |       |  |  |          |   |            |       |         |          |       |  |
| <i>L</i>                                                                                                                           | +1.7                                                                                                                                                                                                                                                                                                                                                                                                                                                                                                                                                                                                                                                                                                                                                                                                                                                                                                                                                                                                                     |                                                                                                                                                                                                                                                                                                                                                                                        |                                                                                                                                                                                                                                                                                                                                                                                                                                                                                                                                                                                                                                                                                                                                                             |  |                |   |            |      |         |          |      |  |                  |  |  |            |      |         |          |       |  |  |          |   |            |       |         |          |       |  |
| plus ≥15 letters                                                                                                                   |                                                                                                                                                                                                                                                                                                                                                                                                                                                                                                                                                                                                                                                                                                                                                                                                                                                                                                                                                                                                                          |                                                                                                                                                                                                                                                                                                                                                                                        |                                                                                                                                                                                                                                                                                                                                                                                                                                                                                                                                                                                                                                                                                                                                                             |  |                |   |            |      |         |          |      |  |                  |  |  |            |      |         |          |       |  |  |          |   |            |       |         |          |       |  |
| <i>IVT</i>                                                                                                                         | 4.8%                                                                                                                                                                                                                                                                                                                                                                                                                                                                                                                                                                                                                                                                                                                                                                                                                                                                                                                                                                                                                     | NS vs L                                                                                                                                                                                                                                                                                                                                                                                |                                                                                                                                                                                                                                                                                                                                                                                                                                                                                                                                                                                                                                                                                                                                                             |  |                |   |            |      |         |          |      |  |                  |  |  |            |      |         |          |       |  |  |          |   |            |       |         |          |       |  |
| <i>L</i>                                                                                                                           | 12.2%                                                                                                                                                                                                                                                                                                                                                                                                                                                                                                                                                                                                                                                                                                                                                                                                                                                                                                                                                                                                                    |                                                                                                                                                                                                                                                                                                                                                                                        |                                                                                                                                                                                                                                                                                                                                                                                                                                                                                                                                                                                                                                                                                                                                                             |  |                |   |            |      |         |          |      |  |                  |  |  |            |      |         |          |       |  |  |          |   |            |       |         |          |       |  |
|                                                                                                                                    | CMT (μm)                                                                                                                                                                                                                                                                                                                                                                                                                                                                                                                                                                                                                                                                                                                                                                                                                                                                                                                                                                                                                 | p                                                                                                                                                                                                                                                                                                                                                                                      |                                                                                                                                                                                                                                                                                                                                                                                                                                                                                                                                                                                                                                                                                                                                                             |  |                |   |            |      |         |          |      |  |                  |  |  |            |      |         |          |       |  |  |          |   |            |       |         |          |       |  |
| <i>IVT</i>                                                                                                                         | -91.3                                                                                                                                                                                                                                                                                                                                                                                                                                                                                                                                                                                                                                                                                                                                                                                                                                                                                                                                                                                                                    | NS vs L                                                                                                                                                                                                                                                                                                                                                                                |                                                                                                                                                                                                                                                                                                                                                                                                                                                                                                                                                                                                                                                                                                                                                             |  |                |   |            |      |         |          |      |  |                  |  |  |            |      |         |          |       |  |  |          |   |            |       |         |          |       |  |
| <i>L</i>                                                                                                                           | -63.7                                                                                                                                                                                                                                                                                                                                                                                                                                                                                                                                                                                                                                                                                                                                                                                                                                                                                                                                                                                                                    |                                                                                                                                                                                                                                                                                                                                                                                        |                                                                                                                                                                                                                                                                                                                                                                                                                                                                                                                                                                                                                                                                                                                                                             |  |                |   |            |      |         |          |      |  |                  |  |  |            |      |         |          |       |  |  |          |   |            |       |         |          |       |  |

**Abbreviations:** See table 2



Table 8: Trials assessing more than one drug

| Study                                                                                                                                                                           | Participants and baseline values                                                                                                                                                                                                                                                                                                                                                                                                                                                                                                                                                                                                                                                                                                                                                                                                                                                                                                                                                                                                              | Intervention                                                                                                                                                                                                                                                                                                                                                                     | Outcome (change from baseline at study end)                                                                                                                                                                                                                                                                                                                                                                                                                                                                                                                                                                                                                                                                                                                                                                                                                                                                                                                  |  |                       |   |            |                                                |                          |                |                                                 |               |          |                                               |  |  |                        |   |            |                       |                           |                |                       |            |          |                  |  |
|---------------------------------------------------------------------------------------------------------------------------------------------------------------------------------|-----------------------------------------------------------------------------------------------------------------------------------------------------------------------------------------------------------------------------------------------------------------------------------------------------------------------------------------------------------------------------------------------------------------------------------------------------------------------------------------------------------------------------------------------------------------------------------------------------------------------------------------------------------------------------------------------------------------------------------------------------------------------------------------------------------------------------------------------------------------------------------------------------------------------------------------------------------------------------------------------------------------------------------------------|----------------------------------------------------------------------------------------------------------------------------------------------------------------------------------------------------------------------------------------------------------------------------------------------------------------------------------------------------------------------------------|--------------------------------------------------------------------------------------------------------------------------------------------------------------------------------------------------------------------------------------------------------------------------------------------------------------------------------------------------------------------------------------------------------------------------------------------------------------------------------------------------------------------------------------------------------------------------------------------------------------------------------------------------------------------------------------------------------------------------------------------------------------------------------------------------------------------------------------------------------------------------------------------------------------------------------------------------------------|--|-----------------------|---|------------|------------------------------------------------|--------------------------|----------------|-------------------------------------------------|---------------|----------|-----------------------------------------------|--|--|------------------------|---|------------|-----------------------|---------------------------|----------------|-----------------------|------------|----------|------------------|--|
| <p><b>Ahmadih 2008</b>[31]<br/><b>Iran</b></p> <p><b>Design:</b> 3-arm placebo-controlled RCT<br/><b>Follow-up:</b> 24 weeks</p>                                                | <p><b>N:</b> 115 eyes of 101 patients<br/><b>Inclusion criteria:</b> eyes with clinically significant DMO unresponsive to previous macular laser photocoagulation (last session &gt;3 months prior)<br/><b>Exclusion criteria:</b> visual acuity <math>\geq 20/40</math>; history of cataract surgery within past 6 months; prior intraocular injection or vitrectomy, glaucoma or ocular hypertension; PDR with high-risk characteristics; vitreous hemorrhage; significant media opacity; presence of traction on the macula; pregnancy; serum creatinine <math>\geq 3</math> mg/100 ml; monocular patients<br/><b>Age:</b> 59.7 SD8.3 years (range 39 to 74)<br/><b>Sex:</b> 50.5% female<br/><b>Diabetes type:</b> not reported, 27.6% to 33.3% on insulin<br/><b>HbA1c:</b> 9.35% to 10.06%<br/><b>Baseline VA:</b> not reported<br/><b>Baseline CMT:</b> not reported<br/><b>Comorbidities:</b> (percentage of eyes) 13.9% history of cataract surgery, 81.7% NPDR, 4.3% early PDR, 13.9% regressed PDR; no iris neovascularization</p> | <p><b>Group 1 (IVB, n=41 eyes):</b> bevacizumab 1.25 mg (0.05 ml)<br/><b>Group 2 (IVB/IVT, n=37 eyes):</b> combined bevacizumab (1.25 mg (0.05 ml)) and triamcinolone (2 mg (0.05 ml)), followed by two injections of bevacizumab alone<br/><b>Group 3 (C, n=37 eyes):</b> sham injection<br/><b>Regimen for all groups:</b> 3 consecutive IV injections at 6-week intervals</p> | <p><b>At 24 weeks</b></p> <p><b>BCVA (Snellen chart):</b></p> <table border="1"> <thead> <tr> <th></th> <th>BCVA (logMAR), 95% CI</th> <th>p</th> </tr> </thead> <tbody> <tr> <td><i>IVB</i></td> <td>-0.18 (-0.29, -0.08)<br/>[+9 letters (4, 14.5)]</td> <td>0.01 vs C, NS vs IVB/IVT</td> </tr> <tr> <td><i>IVB/IVT</i></td> <td>-0.21 (-0.30, -0.12)<br/>[+10.5 letters (6, 15)]</td> <td>0.006 vs C</td> </tr> <tr> <td><i>C</i></td> <td>-0.03 (-0.08, 0.14)<br/>[+1.5 letters (-7, 4)]</td> <td></td> </tr> </tbody> </table> <p><b>CMT (OCT):</b></p> <table border="1"> <thead> <tr> <th></th> <th>CMT (<math>\mu</math>m), 95% CI</th> <th>p</th> </tr> </thead> <tbody> <tr> <td><i>IVB</i></td> <td>-95.7 (-172.2, -19.3)</td> <td>0.012 vs C, NS vs IVB/IVT</td> </tr> <tr> <td><i>IVB/IVT</i></td> <td>-92.1 (-154.4, -29.7)</td> <td>0.022 vs C</td> </tr> <tr> <td><i>C</i></td> <td>34.9 (7.9, 61.9)</td> <td></td> </tr> </tbody> </table> |  | BCVA (logMAR), 95% CI | p | <i>IVB</i> | -0.18 (-0.29, -0.08)<br>[+9 letters (4, 14.5)] | 0.01 vs C, NS vs IVB/IVT | <i>IVB/IVT</i> | -0.21 (-0.30, -0.12)<br>[+10.5 letters (6, 15)] | 0.006 vs C    | <i>C</i> | -0.03 (-0.08, 0.14)<br>[+1.5 letters (-7, 4)] |  |  | CMT ( $\mu$ m), 95% CI | p | <i>IVB</i> | -95.7 (-172.2, -19.3) | 0.012 vs C, NS vs IVB/IVT | <i>IVB/IVT</i> | -92.1 (-154.4, -29.7) | 0.022 vs C | <i>C</i> | 34.9 (7.9, 61.9) |  |
|                                                                                                                                                                                 | BCVA (logMAR), 95% CI                                                                                                                                                                                                                                                                                                                                                                                                                                                                                                                                                                                                                                                                                                                                                                                                                                                                                                                                                                                                                         | p                                                                                                                                                                                                                                                                                                                                                                                |                                                                                                                                                                                                                                                                                                                                                                                                                                                                                                                                                                                                                                                                                                                                                                                                                                                                                                                                                              |  |                       |   |            |                                                |                          |                |                                                 |               |          |                                               |  |  |                        |   |            |                       |                           |                |                       |            |          |                  |  |
| <i>IVB</i>                                                                                                                                                                      | -0.18 (-0.29, -0.08)<br>[+9 letters (4, 14.5)]                                                                                                                                                                                                                                                                                                                                                                                                                                                                                                                                                                                                                                                                                                                                                                                                                                                                                                                                                                                                | 0.01 vs C, NS vs IVB/IVT                                                                                                                                                                                                                                                                                                                                                         |                                                                                                                                                                                                                                                                                                                                                                                                                                                                                                                                                                                                                                                                                                                                                                                                                                                                                                                                                              |  |                       |   |            |                                                |                          |                |                                                 |               |          |                                               |  |  |                        |   |            |                       |                           |                |                       |            |          |                  |  |
| <i>IVB/IVT</i>                                                                                                                                                                  | -0.21 (-0.30, -0.12)<br>[+10.5 letters (6, 15)]                                                                                                                                                                                                                                                                                                                                                                                                                                                                                                                                                                                                                                                                                                                                                                                                                                                                                                                                                                                               | 0.006 vs C                                                                                                                                                                                                                                                                                                                                                                       |                                                                                                                                                                                                                                                                                                                                                                                                                                                                                                                                                                                                                                                                                                                                                                                                                                                                                                                                                              |  |                       |   |            |                                                |                          |                |                                                 |               |          |                                               |  |  |                        |   |            |                       |                           |                |                       |            |          |                  |  |
| <i>C</i>                                                                                                                                                                        | -0.03 (-0.08, 0.14)<br>[+1.5 letters (-7, 4)]                                                                                                                                                                                                                                                                                                                                                                                                                                                                                                                                                                                                                                                                                                                                                                                                                                                                                                                                                                                                 |                                                                                                                                                                                                                                                                                                                                                                                  |                                                                                                                                                                                                                                                                                                                                                                                                                                                                                                                                                                                                                                                                                                                                                                                                                                                                                                                                                              |  |                       |   |            |                                                |                          |                |                                                 |               |          |                                               |  |  |                        |   |            |                       |                           |                |                       |            |          |                  |  |
|                                                                                                                                                                                 | CMT ( $\mu$ m), 95% CI                                                                                                                                                                                                                                                                                                                                                                                                                                                                                                                                                                                                                                                                                                                                                                                                                                                                                                                                                                                                                        | p                                                                                                                                                                                                                                                                                                                                                                                |                                                                                                                                                                                                                                                                                                                                                                                                                                                                                                                                                                                                                                                                                                                                                                                                                                                                                                                                                              |  |                       |   |            |                                                |                          |                |                                                 |               |          |                                               |  |  |                        |   |            |                       |                           |                |                       |            |          |                  |  |
| <i>IVB</i>                                                                                                                                                                      | -95.7 (-172.2, -19.3)                                                                                                                                                                                                                                                                                                                                                                                                                                                                                                                                                                                                                                                                                                                                                                                                                                                                                                                                                                                                                         | 0.012 vs C, NS vs IVB/IVT                                                                                                                                                                                                                                                                                                                                                        |                                                                                                                                                                                                                                                                                                                                                                                                                                                                                                                                                                                                                                                                                                                                                                                                                                                                                                                                                              |  |                       |   |            |                                                |                          |                |                                                 |               |          |                                               |  |  |                        |   |            |                       |                           |                |                       |            |          |                  |  |
| <i>IVB/IVT</i>                                                                                                                                                                  | -92.1 (-154.4, -29.7)                                                                                                                                                                                                                                                                                                                                                                                                                                                                                                                                                                                                                                                                                                                                                                                                                                                                                                                                                                                                                         | 0.022 vs C                                                                                                                                                                                                                                                                                                                                                                       |                                                                                                                                                                                                                                                                                                                                                                                                                                                                                                                                                                                                                                                                                                                                                                                                                                                                                                                                                              |  |                       |   |            |                                                |                          |                |                                                 |               |          |                                               |  |  |                        |   |            |                       |                           |                |                       |            |          |                  |  |
| <i>C</i>                                                                                                                                                                        | 34.9 (7.9, 61.9)                                                                                                                                                                                                                                                                                                                                                                                                                                                                                                                                                                                                                                                                                                                                                                                                                                                                                                                                                                                                                              |                                                                                                                                                                                                                                                                                                                                                                                  |                                                                                                                                                                                                                                                                                                                                                                                                                                                                                                                                                                                                                                                                                                                                                                                                                                                                                                                                                              |  |                       |   |            |                                                |                          |                |                                                 |               |          |                                               |  |  |                        |   |            |                       |                           |                |                       |            |          |                  |  |
| <p><b>ATEMD 2011 (Oliveira Neto 2010 / 2011)</b> [56]<br/>Multicenter<br/><b>Design:</b> 3-arm RCT<br/><b>Follow-up:</b> 6 months</p> <p><b>Note:</b> only 48.3% completion</p> | <p><b>N:</b> 120 eyes of 120 patients<br/><b>Inclusion criteria:</b> DMO, BCVA 20/40 to 20/400, CMT <math>\geq 275</math> <math>\mu</math>m<br/><b>Exclusion criteria:</b> PDR, laser photocoagulation in previous 3 months, no IV corticosteroid or anti-VEGF in previous 3 months<br/><b>Age:</b> not reported<br/><b>Sex:</b> not reported<br/><b>Diabetes type:</b> not reported<br/><b>HbA1c:</b> not reported<br/><b>Baseline VA:</b> not reported<br/><b>Baseline CMT:</b> not reported<br/><b>Comorbidities:</b> not reported</p>                                                                                                                                                                                                                                                                                                                                                                                                                                                                                                     | <p><b>Group 1 (IVB, n=NR eyes):</b> 1.25 mg (0.05 ml) of IV bevacizumab<br/><b>Group 2 (IVT, n=NR eyes):</b> 4 mg (0.1 ml) of IV triamcinolone acetonide<br/><b>Group 3 (IVB/IVT, n=NR eyes):</b> 1.25 mg (0.05 ml) of IV bevacizumab plus 4 mg (0.1 ml) of IV triamcinolone acetonide<br/><b>Regimen for all groups:</b> monthly injections</p>                                 | <p><b>At 6 months</b></p> <p><b>BCVA:</b></p> <ul style="list-style-type: none"> <li>no significant difference between groups (between 1.7 and 2.3 lines gained in the different groups in 2010 report (n=18))</li> </ul> <p><b>CMT (OCT):</b></p> <ul style="list-style-type: none"> <li>CMT reduced in all 3 groups (between 17 and 33% reduction in the different groups in 2010 report (n=18)); no significant difference between groups</li> </ul>                                                                                                                                                                                                                                                                                                                                                                                                                                                                                                      |  |                       |   |            |                                                |                          |                |                                                 |               |          |                                               |  |  |                        |   |            |                       |                           |                |                       |            |          |                  |  |
| <p><b>DRCR Network 2010 (Elman 2010, Elman 2011)</b>[21,46]<br/><b>USA</b><br/>Multicenter</p>                                                                                  | <p><b>N:</b> 854 eyes of 691 patients<br/><b>Inclusion criteria:</b> <math>\geq 18</math> years, type 1 or 2 DM; study eye: (1) BCVA letter score 78 to 24 (20/32 to 20/320), (2) definite retinal thickening due to DMO assessed to be main cause of visual loss, (3) retinal thickness measured on time domain OCT <math>\geq 250</math> <math>\mu</math>m in central</p>                                                                                                                                                                                                                                                                                                                                                                                                                                                                                                                                                                                                                                                                   | <p><b>Group 1 (CPL, n=293 eyes):</b> sham injection plus prompt (within 3-10 days after injection) focal/grid photocoagulation<br/><b>Group 2 (RPL, n=187 eyes):</b> 0.5 mg IV ranibizumab plus prompt focal/grid</p>                                                                                                                                                            | <p><b>At 1 year</b></p> <p><b>BCVA (E-ETDRS Visual Acuity Test):</b></p> <table border="1"> <thead> <tr> <th></th> <th>BCVA (letters)</th> <th>p</th> </tr> </thead> <tbody> <tr> <td><i>CPL</i></td> <td>+3 SD13</td> <td></td> </tr> <tr> <td><i>RPL</i></td> <td>+9 SD11</td> <td>&lt;0.001 vs CPL</td> </tr> </tbody> </table>                                                                                                                                                                                                                                                                                                                                                                                                                                                                                                                                                                                                                           |  | BCVA (letters)        | p | <i>CPL</i> | +3 SD13                                        |                          | <i>RPL</i>     | +9 SD11                                         | <0.001 vs CPL |          |                                               |  |  |                        |   |            |                       |                           |                |                       |            |          |                  |  |
|                                                                                                                                                                                 | BCVA (letters)                                                                                                                                                                                                                                                                                                                                                                                                                                                                                                                                                                                                                                                                                                                                                                                                                                                                                                                                                                                                                                | p                                                                                                                                                                                                                                                                                                                                                                                |                                                                                                                                                                                                                                                                                                                                                                                                                                                                                                                                                                                                                                                                                                                                                                                                                                                                                                                                                              |  |                       |   |            |                                                |                          |                |                                                 |               |          |                                               |  |  |                        |   |            |                       |                           |                |                       |            |          |                  |  |
| <i>CPL</i>                                                                                                                                                                      | +3 SD13                                                                                                                                                                                                                                                                                                                                                                                                                                                                                                                                                                                                                                                                                                                                                                                                                                                                                                                                                                                                                                       |                                                                                                                                                                                                                                                                                                                                                                                  |                                                                                                                                                                                                                                                                                                                                                                                                                                                                                                                                                                                                                                                                                                                                                                                                                                                                                                                                                              |  |                       |   |            |                                                |                          |                |                                                 |               |          |                                               |  |  |                        |   |            |                       |                           |                |                       |            |          |                  |  |
| <i>RPL</i>                                                                                                                                                                      | +9 SD11                                                                                                                                                                                                                                                                                                                                                                                                                                                                                                                                                                                                                                                                                                                                                                                                                                                                                                                                                                                                                                       | <0.001 vs CPL                                                                                                                                                                                                                                                                                                                                                                    |                                                                                                                                                                                                                                                                                                                                                                                                                                                                                                                                                                                                                                                                                                                                                                                                                                                                                                                                                              |  |                       |   |            |                                                |                          |                |                                                 |               |          |                                               |  |  |                        |   |            |                       |                           |                |                       |            |          |                  |  |

| Study                                                                                                                                         | Participants and baseline values                                                                                                                                                                                                                                                                                                                                                                                                                                                                                                                                                                                                                                                                                                                                                                                                                                                                                                                                                                                                                                                                                                                                                                                                                                                                                                                                                                                                   | Intervention                                                                                                                                                                                                                                                                                                                                                                                                                                                                                                                                                                                                                                                                                                                                                                                                                                                                                                                                                                                                                                                                                                                                                                                                                                                                                                                                                                                                                                                                                                                                                                                                                | Outcome (change from baseline at study end)                                                                                                                                                                                                                                                                                                                                                                                                                                                                                                                                                                                                                                                                                                                                                                                                                                                                                                                                                                                                                                                                                                                                                                                                                                                                                                                                                                                                                                                                                                                                                                                                                                                                                                                                                                                                                                                                                                                                                                                                                                                                                                                                                                                                                                                                                                                                                                                                                                                                                                                          |  |  |  |            |         |                  |            |         |           |            |                  |  |  |               |  |  |                  |  |            |                  |                  |  |               |  |  |                 |  |            |                  |                  |  |               |  |  |                 |  |            |                  |           |  |               |  |  |                  |  |  |                |   |            |            |  |            |            |                  |            |            |                  |            |            |                  |
|-----------------------------------------------------------------------------------------------------------------------------------------------|------------------------------------------------------------------------------------------------------------------------------------------------------------------------------------------------------------------------------------------------------------------------------------------------------------------------------------------------------------------------------------------------------------------------------------------------------------------------------------------------------------------------------------------------------------------------------------------------------------------------------------------------------------------------------------------------------------------------------------------------------------------------------------------------------------------------------------------------------------------------------------------------------------------------------------------------------------------------------------------------------------------------------------------------------------------------------------------------------------------------------------------------------------------------------------------------------------------------------------------------------------------------------------------------------------------------------------------------------------------------------------------------------------------------------------|-----------------------------------------------------------------------------------------------------------------------------------------------------------------------------------------------------------------------------------------------------------------------------------------------------------------------------------------------------------------------------------------------------------------------------------------------------------------------------------------------------------------------------------------------------------------------------------------------------------------------------------------------------------------------------------------------------------------------------------------------------------------------------------------------------------------------------------------------------------------------------------------------------------------------------------------------------------------------------------------------------------------------------------------------------------------------------------------------------------------------------------------------------------------------------------------------------------------------------------------------------------------------------------------------------------------------------------------------------------------------------------------------------------------------------------------------------------------------------------------------------------------------------------------------------------------------------------------------------------------------------|----------------------------------------------------------------------------------------------------------------------------------------------------------------------------------------------------------------------------------------------------------------------------------------------------------------------------------------------------------------------------------------------------------------------------------------------------------------------------------------------------------------------------------------------------------------------------------------------------------------------------------------------------------------------------------------------------------------------------------------------------------------------------------------------------------------------------------------------------------------------------------------------------------------------------------------------------------------------------------------------------------------------------------------------------------------------------------------------------------------------------------------------------------------------------------------------------------------------------------------------------------------------------------------------------------------------------------------------------------------------------------------------------------------------------------------------------------------------------------------------------------------------------------------------------------------------------------------------------------------------------------------------------------------------------------------------------------------------------------------------------------------------------------------------------------------------------------------------------------------------------------------------------------------------------------------------------------------------------------------------------------------------------------------------------------------------------------------------------------------------------------------------------------------------------------------------------------------------------------------------------------------------------------------------------------------------------------------------------------------------------------------------------------------------------------------------------------------------------------------------------------------------------------------------------------------------|--|--|--|------------|---------|------------------|------------|---------|-----------|------------|------------------|--|--|---------------|--|--|------------------|--|------------|------------------|------------------|--|---------------|--|--|-----------------|--|------------|------------------|------------------|--|---------------|--|--|-----------------|--|------------|------------------|-----------|--|---------------|--|--|------------------|--|--|----------------|---|------------|------------|--|------------|------------|------------------|------------|------------|------------------|------------|------------|------------------|
| <p><b>Design:</b> 4-arm placebo-controlled RCT</p> <p><b>Follow-up:</b> 1-2 years; 2 years extension (Elman 2011) for consenting patients</p> | <p>subfield (2 study eyes per patient could be included if both were eligible at study entry)</p> <p><b>Exclusion criteria:</b> (1) treatment for DMO within the prior 3 months, (2) panretinal photocoagulation within the prior 4 months or anticipated need for panretinal photocoagulation within the next 6 months, (3) major ocular surgery within the prior 4 months, (4) history of open-angle glaucoma or steroid-induced IOP elevation, requiring IOP-lowering treatment, (5) IOP <math>\geq</math> 25 mmHg; systolic pressure <math>&gt;</math> 180 mmHg, diastolic pressure <math>&gt;</math> 110 mmHg; myocardial infarction, other cardiac event requiring hospitalization, cerebrovascular accident, transient ischemic attack, treatment for acute congestive heart failure within 4 months before randomization</p> <p><b>Age:</b> median 62 to 64 years (25<sup>th</sup>, 75<sup>th</sup> centile 55 to 58, 69 to 70)</p> <p><b>Sex:</b> 41 to 46% female</p> <p><b>Diabetes type:</b> 6 to 9% type 1 DM, 89 to 92% type 2 DM, 2 to 3% uncertain</p> <p><b>HbA1c:</b> median 7.3 to 7.5% (25<sup>th</sup>, 75<sup>th</sup> centile 6.5 to 6.7, 8.3 to 8.6)</p> <p><b>Baseline VA:</b> letter score 63 SD12 (~20/63 SD2.4 lines)</p> <p><b>Baseline CMT:</b> 405 SD134 <math>\mu</math>m</p> <p><b>Comorbidities:</b> 60 to 67% prior treatment for DMO; 61 to 68% with NPDR, 26 to 36% with PDR or PDR scars</p> | <p>photocoagulation</p> <p><b>Group 3 (RDL, n=188 eyes):</b> 0.5 mg IV ranibizumab plus deferred (<math>\geq</math>24 weeks) focal/grid photocoagulation</p> <p><b>Group 4 (TPL, n=186 eyes):</b> 4 mg IV triamcinolone plus prompt focal/grid photocoagulation</p> <p><b>Regimen for all groups:</b> Baseline treatment 0.5 mg IV ranibizumab and 4 mg preservative free triamcinolone; study treatment every 4 weeks up to 12 weeks, then retreatment algorithm: 16 to 20 weeks, monthly retreatment unless 'success' criteria were met (visual acuity letter score <math>\geq</math>84 (20/20) or OCT central subfield thickness <math>&lt;</math>250 <math>\mu</math>m); 24 to 48 weeks, patients subdivided (according to predefined criteria) into 'success', 'improvement', 'no improvement' or 'failure'; 'improvement' group continued treatment, other groups treated at investigator discretion; alternative treatment permitted if eye met criteria for 'failure' or 'futility'. In the case of retreatment, ranibizumab could be given as often as every 4 weeks, and triamcinolone every 16 weeks (with sham injections as often as every 4 weeks). Retreatments for focal/grid laser (after <math>\geq</math>13 weeks from previous treatment) if there was oedema involving or threatening the center of the macula and if complete laser had not been given; retreatment algorithms facilitated by web-based real-time data entry system. Median number of drug injections before 1 year visit was 8-9 for ranibizumab, 3 for triamcinolone, and 5 sham injections. Retreatments between 1 and 2 years</p> | <table border="1"> <thead> <tr> <th></th> <th></th> <th></th> </tr> </thead> <tbody> <tr> <td><b>RDL</b></td> <td>+9 SD12</td> <td><math>&lt;</math>0.001 vs CPL</td> </tr> <tr> <td><b>TPL</b></td> <td>+4 SD13</td> <td>NS vs CPL</td> </tr> </tbody> </table> <p><b>BCVA gain categories (letters)</b></p> <table border="1"> <tbody> <tr> <td><b>CPL</b></td> <td>+10 or more: 28%</td> <td></td> </tr> <tr> <td></td> <td>+9 to -9: 59%</td> <td></td> </tr> <tr> <td></td> <td>-10 or more: 13%</td> <td></td> </tr> <tr> <td><b>RPL</b></td> <td>+10 or more: 50%</td> <td><math>&lt;</math>0.001 vs CPL</td> </tr> <tr> <td></td> <td>+9 to -9: 45%</td> <td></td> </tr> <tr> <td></td> <td>-10 or more: 4%</td> <td></td> </tr> <tr> <td><b>RDL</b></td> <td>+10 or more: 47%</td> <td><math>&lt;</math>0.001 vs CPL</td> </tr> <tr> <td></td> <td>+9 to -9: 51%</td> <td></td> </tr> <tr> <td></td> <td>-10 or more: 3%</td> <td></td> </tr> <tr> <td><b>TPL</b></td> <td>+10 or more: 33%</td> <td>NS vs CPL</td> </tr> <tr> <td></td> <td>+9 to -9: 52%</td> <td></td> </tr> <tr> <td></td> <td>-10 or more: 14%</td> <td></td> </tr> </tbody> </table> <p>Subgroups:</p> <ul style="list-style-type: none"> <li>BCVA results in TPL group substantially better for pseudophakic eyes than for phakic eyes (comparable to results for RPL and RDL groups) (p not reported)</li> <li>no difference in results according to prior treatment for DMO, baseline VA, baseline CMT, baseline level of retinopathy, focal or diffuse oedema</li> </ul> <p><b>CMT (OCT):</b></p> <table border="1"> <thead> <tr> <th></th> <th>CMT (<math>\mu</math>m)</th> <th>p</th> </tr> </thead> <tbody> <tr> <td><b>CPL</b></td> <td>-102 SD151</td> <td></td> </tr> <tr> <td><b>RPL</b></td> <td>-131 SD129</td> <td><math>&lt;</math>0.001 vs CPL</td> </tr> <tr> <td><b>RDL</b></td> <td>-137 SD136</td> <td><math>&lt;</math>0.001 vs CPL</td> </tr> <tr> <td><b>TPL</b></td> <td>-127 SD140</td> <td><math>&lt;</math>0.001 vs CPL</td> </tr> </tbody> </table> <p>Subgroups:</p> <ul style="list-style-type: none"> <li>pattern of CMT decrease similar for groups with CMT <math>&lt;</math>400 <math>\mu</math>m and <math>\geq</math>400 <math>\mu</math>m at baseline</li> <li>Significantly more patients with severe NPDR or worse improved by 2 levels or more in the ranibizumab groups (28%, no significant change in the other groups)</li> </ul> <p><b>At 2 years (expanded results, Elman 2011)</b></p> <p><b>BCVA (E-ETDRS Visual Acuity Test):</b></p> |  |  |  | <b>RDL</b> | +9 SD12 | $<$ 0.001 vs CPL | <b>TPL</b> | +4 SD13 | NS vs CPL | <b>CPL</b> | +10 or more: 28% |  |  | +9 to -9: 59% |  |  | -10 or more: 13% |  | <b>RPL</b> | +10 or more: 50% | $<$ 0.001 vs CPL |  | +9 to -9: 45% |  |  | -10 or more: 4% |  | <b>RDL</b> | +10 or more: 47% | $<$ 0.001 vs CPL |  | +9 to -9: 51% |  |  | -10 or more: 3% |  | <b>TPL</b> | +10 or more: 33% | NS vs CPL |  | +9 to -9: 52% |  |  | -10 or more: 14% |  |  | CMT ( $\mu$ m) | p | <b>CPL</b> | -102 SD151 |  | <b>RPL</b> | -131 SD129 | $<$ 0.001 vs CPL | <b>RDL</b> | -137 SD136 | $<$ 0.001 vs CPL | <b>TPL</b> | -127 SD140 | $<$ 0.001 vs CPL |
|                                                                                                                                               |                                                                                                                                                                                                                                                                                                                                                                                                                                                                                                                                                                                                                                                                                                                                                                                                                                                                                                                                                                                                                                                                                                                                                                                                                                                                                                                                                                                                                                    |                                                                                                                                                                                                                                                                                                                                                                                                                                                                                                                                                                                                                                                                                                                                                                                                                                                                                                                                                                                                                                                                                                                                                                                                                                                                                                                                                                                                                                                                                                                                                                                                                             |                                                                                                                                                                                                                                                                                                                                                                                                                                                                                                                                                                                                                                                                                                                                                                                                                                                                                                                                                                                                                                                                                                                                                                                                                                                                                                                                                                                                                                                                                                                                                                                                                                                                                                                                                                                                                                                                                                                                                                                                                                                                                                                                                                                                                                                                                                                                                                                                                                                                                                                                                                      |  |  |  |            |         |                  |            |         |           |            |                  |  |  |               |  |  |                  |  |            |                  |                  |  |               |  |  |                 |  |            |                  |                  |  |               |  |  |                 |  |            |                  |           |  |               |  |  |                  |  |  |                |   |            |            |  |            |            |                  |            |            |                  |            |            |                  |
| <b>RDL</b>                                                                                                                                    | +9 SD12                                                                                                                                                                                                                                                                                                                                                                                                                                                                                                                                                                                                                                                                                                                                                                                                                                                                                                                                                                                                                                                                                                                                                                                                                                                                                                                                                                                                                            | $<$ 0.001 vs CPL                                                                                                                                                                                                                                                                                                                                                                                                                                                                                                                                                                                                                                                                                                                                                                                                                                                                                                                                                                                                                                                                                                                                                                                                                                                                                                                                                                                                                                                                                                                                                                                                            |                                                                                                                                                                                                                                                                                                                                                                                                                                                                                                                                                                                                                                                                                                                                                                                                                                                                                                                                                                                                                                                                                                                                                                                                                                                                                                                                                                                                                                                                                                                                                                                                                                                                                                                                                                                                                                                                                                                                                                                                                                                                                                                                                                                                                                                                                                                                                                                                                                                                                                                                                                      |  |  |  |            |         |                  |            |         |           |            |                  |  |  |               |  |  |                  |  |            |                  |                  |  |               |  |  |                 |  |            |                  |                  |  |               |  |  |                 |  |            |                  |           |  |               |  |  |                  |  |  |                |   |            |            |  |            |            |                  |            |            |                  |            |            |                  |
| <b>TPL</b>                                                                                                                                    | +4 SD13                                                                                                                                                                                                                                                                                                                                                                                                                                                                                                                                                                                                                                                                                                                                                                                                                                                                                                                                                                                                                                                                                                                                                                                                                                                                                                                                                                                                                            | NS vs CPL                                                                                                                                                                                                                                                                                                                                                                                                                                                                                                                                                                                                                                                                                                                                                                                                                                                                                                                                                                                                                                                                                                                                                                                                                                                                                                                                                                                                                                                                                                                                                                                                                   |                                                                                                                                                                                                                                                                                                                                                                                                                                                                                                                                                                                                                                                                                                                                                                                                                                                                                                                                                                                                                                                                                                                                                                                                                                                                                                                                                                                                                                                                                                                                                                                                                                                                                                                                                                                                                                                                                                                                                                                                                                                                                                                                                                                                                                                                                                                                                                                                                                                                                                                                                                      |  |  |  |            |         |                  |            |         |           |            |                  |  |  |               |  |  |                  |  |            |                  |                  |  |               |  |  |                 |  |            |                  |                  |  |               |  |  |                 |  |            |                  |           |  |               |  |  |                  |  |  |                |   |            |            |  |            |            |                  |            |            |                  |            |            |                  |
| <b>CPL</b>                                                                                                                                    | +10 or more: 28%                                                                                                                                                                                                                                                                                                                                                                                                                                                                                                                                                                                                                                                                                                                                                                                                                                                                                                                                                                                                                                                                                                                                                                                                                                                                                                                                                                                                                   |                                                                                                                                                                                                                                                                                                                                                                                                                                                                                                                                                                                                                                                                                                                                                                                                                                                                                                                                                                                                                                                                                                                                                                                                                                                                                                                                                                                                                                                                                                                                                                                                                             |                                                                                                                                                                                                                                                                                                                                                                                                                                                                                                                                                                                                                                                                                                                                                                                                                                                                                                                                                                                                                                                                                                                                                                                                                                                                                                                                                                                                                                                                                                                                                                                                                                                                                                                                                                                                                                                                                                                                                                                                                                                                                                                                                                                                                                                                                                                                                                                                                                                                                                                                                                      |  |  |  |            |         |                  |            |         |           |            |                  |  |  |               |  |  |                  |  |            |                  |                  |  |               |  |  |                 |  |            |                  |                  |  |               |  |  |                 |  |            |                  |           |  |               |  |  |                  |  |  |                |   |            |            |  |            |            |                  |            |            |                  |            |            |                  |
|                                                                                                                                               | +9 to -9: 59%                                                                                                                                                                                                                                                                                                                                                                                                                                                                                                                                                                                                                                                                                                                                                                                                                                                                                                                                                                                                                                                                                                                                                                                                                                                                                                                                                                                                                      |                                                                                                                                                                                                                                                                                                                                                                                                                                                                                                                                                                                                                                                                                                                                                                                                                                                                                                                                                                                                                                                                                                                                                                                                                                                                                                                                                                                                                                                                                                                                                                                                                             |                                                                                                                                                                                                                                                                                                                                                                                                                                                                                                                                                                                                                                                                                                                                                                                                                                                                                                                                                                                                                                                                                                                                                                                                                                                                                                                                                                                                                                                                                                                                                                                                                                                                                                                                                                                                                                                                                                                                                                                                                                                                                                                                                                                                                                                                                                                                                                                                                                                                                                                                                                      |  |  |  |            |         |                  |            |         |           |            |                  |  |  |               |  |  |                  |  |            |                  |                  |  |               |  |  |                 |  |            |                  |                  |  |               |  |  |                 |  |            |                  |           |  |               |  |  |                  |  |  |                |   |            |            |  |            |            |                  |            |            |                  |            |            |                  |
|                                                                                                                                               | -10 or more: 13%                                                                                                                                                                                                                                                                                                                                                                                                                                                                                                                                                                                                                                                                                                                                                                                                                                                                                                                                                                                                                                                                                                                                                                                                                                                                                                                                                                                                                   |                                                                                                                                                                                                                                                                                                                                                                                                                                                                                                                                                                                                                                                                                                                                                                                                                                                                                                                                                                                                                                                                                                                                                                                                                                                                                                                                                                                                                                                                                                                                                                                                                             |                                                                                                                                                                                                                                                                                                                                                                                                                                                                                                                                                                                                                                                                                                                                                                                                                                                                                                                                                                                                                                                                                                                                                                                                                                                                                                                                                                                                                                                                                                                                                                                                                                                                                                                                                                                                                                                                                                                                                                                                                                                                                                                                                                                                                                                                                                                                                                                                                                                                                                                                                                      |  |  |  |            |         |                  |            |         |           |            |                  |  |  |               |  |  |                  |  |            |                  |                  |  |               |  |  |                 |  |            |                  |                  |  |               |  |  |                 |  |            |                  |           |  |               |  |  |                  |  |  |                |   |            |            |  |            |            |                  |            |            |                  |            |            |                  |
| <b>RPL</b>                                                                                                                                    | +10 or more: 50%                                                                                                                                                                                                                                                                                                                                                                                                                                                                                                                                                                                                                                                                                                                                                                                                                                                                                                                                                                                                                                                                                                                                                                                                                                                                                                                                                                                                                   | $<$ 0.001 vs CPL                                                                                                                                                                                                                                                                                                                                                                                                                                                                                                                                                                                                                                                                                                                                                                                                                                                                                                                                                                                                                                                                                                                                                                                                                                                                                                                                                                                                                                                                                                                                                                                                            |                                                                                                                                                                                                                                                                                                                                                                                                                                                                                                                                                                                                                                                                                                                                                                                                                                                                                                                                                                                                                                                                                                                                                                                                                                                                                                                                                                                                                                                                                                                                                                                                                                                                                                                                                                                                                                                                                                                                                                                                                                                                                                                                                                                                                                                                                                                                                                                                                                                                                                                                                                      |  |  |  |            |         |                  |            |         |           |            |                  |  |  |               |  |  |                  |  |            |                  |                  |  |               |  |  |                 |  |            |                  |                  |  |               |  |  |                 |  |            |                  |           |  |               |  |  |                  |  |  |                |   |            |            |  |            |            |                  |            |            |                  |            |            |                  |
|                                                                                                                                               | +9 to -9: 45%                                                                                                                                                                                                                                                                                                                                                                                                                                                                                                                                                                                                                                                                                                                                                                                                                                                                                                                                                                                                                                                                                                                                                                                                                                                                                                                                                                                                                      |                                                                                                                                                                                                                                                                                                                                                                                                                                                                                                                                                                                                                                                                                                                                                                                                                                                                                                                                                                                                                                                                                                                                                                                                                                                                                                                                                                                                                                                                                                                                                                                                                             |                                                                                                                                                                                                                                                                                                                                                                                                                                                                                                                                                                                                                                                                                                                                                                                                                                                                                                                                                                                                                                                                                                                                                                                                                                                                                                                                                                                                                                                                                                                                                                                                                                                                                                                                                                                                                                                                                                                                                                                                                                                                                                                                                                                                                                                                                                                                                                                                                                                                                                                                                                      |  |  |  |            |         |                  |            |         |           |            |                  |  |  |               |  |  |                  |  |            |                  |                  |  |               |  |  |                 |  |            |                  |                  |  |               |  |  |                 |  |            |                  |           |  |               |  |  |                  |  |  |                |   |            |            |  |            |            |                  |            |            |                  |            |            |                  |
|                                                                                                                                               | -10 or more: 4%                                                                                                                                                                                                                                                                                                                                                                                                                                                                                                                                                                                                                                                                                                                                                                                                                                                                                                                                                                                                                                                                                                                                                                                                                                                                                                                                                                                                                    |                                                                                                                                                                                                                                                                                                                                                                                                                                                                                                                                                                                                                                                                                                                                                                                                                                                                                                                                                                                                                                                                                                                                                                                                                                                                                                                                                                                                                                                                                                                                                                                                                             |                                                                                                                                                                                                                                                                                                                                                                                                                                                                                                                                                                                                                                                                                                                                                                                                                                                                                                                                                                                                                                                                                                                                                                                                                                                                                                                                                                                                                                                                                                                                                                                                                                                                                                                                                                                                                                                                                                                                                                                                                                                                                                                                                                                                                                                                                                                                                                                                                                                                                                                                                                      |  |  |  |            |         |                  |            |         |           |            |                  |  |  |               |  |  |                  |  |            |                  |                  |  |               |  |  |                 |  |            |                  |                  |  |               |  |  |                 |  |            |                  |           |  |               |  |  |                  |  |  |                |   |            |            |  |            |            |                  |            |            |                  |            |            |                  |
| <b>RDL</b>                                                                                                                                    | +10 or more: 47%                                                                                                                                                                                                                                                                                                                                                                                                                                                                                                                                                                                                                                                                                                                                                                                                                                                                                                                                                                                                                                                                                                                                                                                                                                                                                                                                                                                                                   | $<$ 0.001 vs CPL                                                                                                                                                                                                                                                                                                                                                                                                                                                                                                                                                                                                                                                                                                                                                                                                                                                                                                                                                                                                                                                                                                                                                                                                                                                                                                                                                                                                                                                                                                                                                                                                            |                                                                                                                                                                                                                                                                                                                                                                                                                                                                                                                                                                                                                                                                                                                                                                                                                                                                                                                                                                                                                                                                                                                                                                                                                                                                                                                                                                                                                                                                                                                                                                                                                                                                                                                                                                                                                                                                                                                                                                                                                                                                                                                                                                                                                                                                                                                                                                                                                                                                                                                                                                      |  |  |  |            |         |                  |            |         |           |            |                  |  |  |               |  |  |                  |  |            |                  |                  |  |               |  |  |                 |  |            |                  |                  |  |               |  |  |                 |  |            |                  |           |  |               |  |  |                  |  |  |                |   |            |            |  |            |            |                  |            |            |                  |            |            |                  |
|                                                                                                                                               | +9 to -9: 51%                                                                                                                                                                                                                                                                                                                                                                                                                                                                                                                                                                                                                                                                                                                                                                                                                                                                                                                                                                                                                                                                                                                                                                                                                                                                                                                                                                                                                      |                                                                                                                                                                                                                                                                                                                                                                                                                                                                                                                                                                                                                                                                                                                                                                                                                                                                                                                                                                                                                                                                                                                                                                                                                                                                                                                                                                                                                                                                                                                                                                                                                             |                                                                                                                                                                                                                                                                                                                                                                                                                                                                                                                                                                                                                                                                                                                                                                                                                                                                                                                                                                                                                                                                                                                                                                                                                                                                                                                                                                                                                                                                                                                                                                                                                                                                                                                                                                                                                                                                                                                                                                                                                                                                                                                                                                                                                                                                                                                                                                                                                                                                                                                                                                      |  |  |  |            |         |                  |            |         |           |            |                  |  |  |               |  |  |                  |  |            |                  |                  |  |               |  |  |                 |  |            |                  |                  |  |               |  |  |                 |  |            |                  |           |  |               |  |  |                  |  |  |                |   |            |            |  |            |            |                  |            |            |                  |            |            |                  |
|                                                                                                                                               | -10 or more: 3%                                                                                                                                                                                                                                                                                                                                                                                                                                                                                                                                                                                                                                                                                                                                                                                                                                                                                                                                                                                                                                                                                                                                                                                                                                                                                                                                                                                                                    |                                                                                                                                                                                                                                                                                                                                                                                                                                                                                                                                                                                                                                                                                                                                                                                                                                                                                                                                                                                                                                                                                                                                                                                                                                                                                                                                                                                                                                                                                                                                                                                                                             |                                                                                                                                                                                                                                                                                                                                                                                                                                                                                                                                                                                                                                                                                                                                                                                                                                                                                                                                                                                                                                                                                                                                                                                                                                                                                                                                                                                                                                                                                                                                                                                                                                                                                                                                                                                                                                                                                                                                                                                                                                                                                                                                                                                                                                                                                                                                                                                                                                                                                                                                                                      |  |  |  |            |         |                  |            |         |           |            |                  |  |  |               |  |  |                  |  |            |                  |                  |  |               |  |  |                 |  |            |                  |                  |  |               |  |  |                 |  |            |                  |           |  |               |  |  |                  |  |  |                |   |            |            |  |            |            |                  |            |            |                  |            |            |                  |
| <b>TPL</b>                                                                                                                                    | +10 or more: 33%                                                                                                                                                                                                                                                                                                                                                                                                                                                                                                                                                                                                                                                                                                                                                                                                                                                                                                                                                                                                                                                                                                                                                                                                                                                                                                                                                                                                                   | NS vs CPL                                                                                                                                                                                                                                                                                                                                                                                                                                                                                                                                                                                                                                                                                                                                                                                                                                                                                                                                                                                                                                                                                                                                                                                                                                                                                                                                                                                                                                                                                                                                                                                                                   |                                                                                                                                                                                                                                                                                                                                                                                                                                                                                                                                                                                                                                                                                                                                                                                                                                                                                                                                                                                                                                                                                                                                                                                                                                                                                                                                                                                                                                                                                                                                                                                                                                                                                                                                                                                                                                                                                                                                                                                                                                                                                                                                                                                                                                                                                                                                                                                                                                                                                                                                                                      |  |  |  |            |         |                  |            |         |           |            |                  |  |  |               |  |  |                  |  |            |                  |                  |  |               |  |  |                 |  |            |                  |                  |  |               |  |  |                 |  |            |                  |           |  |               |  |  |                  |  |  |                |   |            |            |  |            |            |                  |            |            |                  |            |            |                  |
|                                                                                                                                               | +9 to -9: 52%                                                                                                                                                                                                                                                                                                                                                                                                                                                                                                                                                                                                                                                                                                                                                                                                                                                                                                                                                                                                                                                                                                                                                                                                                                                                                                                                                                                                                      |                                                                                                                                                                                                                                                                                                                                                                                                                                                                                                                                                                                                                                                                                                                                                                                                                                                                                                                                                                                                                                                                                                                                                                                                                                                                                                                                                                                                                                                                                                                                                                                                                             |                                                                                                                                                                                                                                                                                                                                                                                                                                                                                                                                                                                                                                                                                                                                                                                                                                                                                                                                                                                                                                                                                                                                                                                                                                                                                                                                                                                                                                                                                                                                                                                                                                                                                                                                                                                                                                                                                                                                                                                                                                                                                                                                                                                                                                                                                                                                                                                                                                                                                                                                                                      |  |  |  |            |         |                  |            |         |           |            |                  |  |  |               |  |  |                  |  |            |                  |                  |  |               |  |  |                 |  |            |                  |                  |  |               |  |  |                 |  |            |                  |           |  |               |  |  |                  |  |  |                |   |            |            |  |            |            |                  |            |            |                  |            |            |                  |
|                                                                                                                                               | -10 or more: 14%                                                                                                                                                                                                                                                                                                                                                                                                                                                                                                                                                                                                                                                                                                                                                                                                                                                                                                                                                                                                                                                                                                                                                                                                                                                                                                                                                                                                                   |                                                                                                                                                                                                                                                                                                                                                                                                                                                                                                                                                                                                                                                                                                                                                                                                                                                                                                                                                                                                                                                                                                                                                                                                                                                                                                                                                                                                                                                                                                                                                                                                                             |                                                                                                                                                                                                                                                                                                                                                                                                                                                                                                                                                                                                                                                                                                                                                                                                                                                                                                                                                                                                                                                                                                                                                                                                                                                                                                                                                                                                                                                                                                                                                                                                                                                                                                                                                                                                                                                                                                                                                                                                                                                                                                                                                                                                                                                                                                                                                                                                                                                                                                                                                                      |  |  |  |            |         |                  |            |         |           |            |                  |  |  |               |  |  |                  |  |            |                  |                  |  |               |  |  |                 |  |            |                  |                  |  |               |  |  |                 |  |            |                  |           |  |               |  |  |                  |  |  |                |   |            |            |  |            |            |                  |            |            |                  |            |            |                  |
|                                                                                                                                               | CMT ( $\mu$ m)                                                                                                                                                                                                                                                                                                                                                                                                                                                                                                                                                                                                                                                                                                                                                                                                                                                                                                                                                                                                                                                                                                                                                                                                                                                                                                                                                                                                                     | p                                                                                                                                                                                                                                                                                                                                                                                                                                                                                                                                                                                                                                                                                                                                                                                                                                                                                                                                                                                                                                                                                                                                                                                                                                                                                                                                                                                                                                                                                                                                                                                                                           |                                                                                                                                                                                                                                                                                                                                                                                                                                                                                                                                                                                                                                                                                                                                                                                                                                                                                                                                                                                                                                                                                                                                                                                                                                                                                                                                                                                                                                                                                                                                                                                                                                                                                                                                                                                                                                                                                                                                                                                                                                                                                                                                                                                                                                                                                                                                                                                                                                                                                                                                                                      |  |  |  |            |         |                  |            |         |           |            |                  |  |  |               |  |  |                  |  |            |                  |                  |  |               |  |  |                 |  |            |                  |                  |  |               |  |  |                 |  |            |                  |           |  |               |  |  |                  |  |  |                |   |            |            |  |            |            |                  |            |            |                  |            |            |                  |
| <b>CPL</b>                                                                                                                                    | -102 SD151                                                                                                                                                                                                                                                                                                                                                                                                                                                                                                                                                                                                                                                                                                                                                                                                                                                                                                                                                                                                                                                                                                                                                                                                                                                                                                                                                                                                                         |                                                                                                                                                                                                                                                                                                                                                                                                                                                                                                                                                                                                                                                                                                                                                                                                                                                                                                                                                                                                                                                                                                                                                                                                                                                                                                                                                                                                                                                                                                                                                                                                                             |                                                                                                                                                                                                                                                                                                                                                                                                                                                                                                                                                                                                                                                                                                                                                                                                                                                                                                                                                                                                                                                                                                                                                                                                                                                                                                                                                                                                                                                                                                                                                                                                                                                                                                                                                                                                                                                                                                                                                                                                                                                                                                                                                                                                                                                                                                                                                                                                                                                                                                                                                                      |  |  |  |            |         |                  |            |         |           |            |                  |  |  |               |  |  |                  |  |            |                  |                  |  |               |  |  |                 |  |            |                  |                  |  |               |  |  |                 |  |            |                  |           |  |               |  |  |                  |  |  |                |   |            |            |  |            |            |                  |            |            |                  |            |            |                  |
| <b>RPL</b>                                                                                                                                    | -131 SD129                                                                                                                                                                                                                                                                                                                                                                                                                                                                                                                                                                                                                                                                                                                                                                                                                                                                                                                                                                                                                                                                                                                                                                                                                                                                                                                                                                                                                         | $<$ 0.001 vs CPL                                                                                                                                                                                                                                                                                                                                                                                                                                                                                                                                                                                                                                                                                                                                                                                                                                                                                                                                                                                                                                                                                                                                                                                                                                                                                                                                                                                                                                                                                                                                                                                                            |                                                                                                                                                                                                                                                                                                                                                                                                                                                                                                                                                                                                                                                                                                                                                                                                                                                                                                                                                                                                                                                                                                                                                                                                                                                                                                                                                                                                                                                                                                                                                                                                                                                                                                                                                                                                                                                                                                                                                                                                                                                                                                                                                                                                                                                                                                                                                                                                                                                                                                                                                                      |  |  |  |            |         |                  |            |         |           |            |                  |  |  |               |  |  |                  |  |            |                  |                  |  |               |  |  |                 |  |            |                  |                  |  |               |  |  |                 |  |            |                  |           |  |               |  |  |                  |  |  |                |   |            |            |  |            |            |                  |            |            |                  |            |            |                  |
| <b>RDL</b>                                                                                                                                    | -137 SD136                                                                                                                                                                                                                                                                                                                                                                                                                                                                                                                                                                                                                                                                                                                                                                                                                                                                                                                                                                                                                                                                                                                                                                                                                                                                                                                                                                                                                         | $<$ 0.001 vs CPL                                                                                                                                                                                                                                                                                                                                                                                                                                                                                                                                                                                                                                                                                                                                                                                                                                                                                                                                                                                                                                                                                                                                                                                                                                                                                                                                                                                                                                                                                                                                                                                                            |                                                                                                                                                                                                                                                                                                                                                                                                                                                                                                                                                                                                                                                                                                                                                                                                                                                                                                                                                                                                                                                                                                                                                                                                                                                                                                                                                                                                                                                                                                                                                                                                                                                                                                                                                                                                                                                                                                                                                                                                                                                                                                                                                                                                                                                                                                                                                                                                                                                                                                                                                                      |  |  |  |            |         |                  |            |         |           |            |                  |  |  |               |  |  |                  |  |            |                  |                  |  |               |  |  |                 |  |            |                  |                  |  |               |  |  |                 |  |            |                  |           |  |               |  |  |                  |  |  |                |   |            |            |  |            |            |                  |            |            |                  |            |            |                  |
| <b>TPL</b>                                                                                                                                    | -127 SD140                                                                                                                                                                                                                                                                                                                                                                                                                                                                                                                                                                                                                                                                                                                                                                                                                                                                                                                                                                                                                                                                                                                                                                                                                                                                                                                                                                                                                         | $<$ 0.001 vs CPL                                                                                                                                                                                                                                                                                                                                                                                                                                                                                                                                                                                                                                                                                                                                                                                                                                                                                                                                                                                                                                                                                                                                                                                                                                                                                                                                                                                                                                                                                                                                                                                                            |                                                                                                                                                                                                                                                                                                                                                                                                                                                                                                                                                                                                                                                                                                                                                                                                                                                                                                                                                                                                                                                                                                                                                                                                                                                                                                                                                                                                                                                                                                                                                                                                                                                                                                                                                                                                                                                                                                                                                                                                                                                                                                                                                                                                                                                                                                                                                                                                                                                                                                                                                                      |  |  |  |            |         |                  |            |         |           |            |                  |  |  |               |  |  |                  |  |            |                  |                  |  |               |  |  |                 |  |            |                  |                  |  |               |  |  |                 |  |            |                  |           |  |               |  |  |                  |  |  |                |   |            |            |  |            |            |                  |            |            |                  |            |            |                  |

1  
2  
3  
4  
5  
6  
7  
8  
9  
10  
11  
12  
13  
14  
15  
16  
17  
18  
19  
20  
21  
22  
23  
24  
25  
26  
27  
28  
29  
30  
31  
32  
33  
34  
35  
36  
37  
38  
39  
40  
41  
42  
43  
44  
45  
46  
47  
48  
49

| Study                                                                                                                                                               | Participants and baseline values                                                                                                                                                                                              | Intervention                                                                                                                                                                                                                                                                                  | Outcome (change from baseline at study end)                                                                                                                                                                                                                                                                                                                                                                                                                                                                                                                                                                                                                                                                                                                                                                                                                                                                                                                                                                                                                                                                                                                                                                                                                                                                                                                                                                                                                                                                                                                                                                                                                                                                                                                                                            |                |                                            |   |                    |         |                                      |                    |         |                                                         |                    |         |                                      |                    |         |           |                                |  |  |            |                  |  |  |               |  |  |                  |  |            |                  |           |  |               |  |  |                 |  |            |                  |             |  |               |  |  |                 |  |            |                  |           |  |               |  |  |                  |  |            |  |  |  |          |   |            |            |  |            |            |              |            |            |             |            |            |           |
|---------------------------------------------------------------------------------------------------------------------------------------------------------------------|-------------------------------------------------------------------------------------------------------------------------------------------------------------------------------------------------------------------------------|-----------------------------------------------------------------------------------------------------------------------------------------------------------------------------------------------------------------------------------------------------------------------------------------------|--------------------------------------------------------------------------------------------------------------------------------------------------------------------------------------------------------------------------------------------------------------------------------------------------------------------------------------------------------------------------------------------------------------------------------------------------------------------------------------------------------------------------------------------------------------------------------------------------------------------------------------------------------------------------------------------------------------------------------------------------------------------------------------------------------------------------------------------------------------------------------------------------------------------------------------------------------------------------------------------------------------------------------------------------------------------------------------------------------------------------------------------------------------------------------------------------------------------------------------------------------------------------------------------------------------------------------------------------------------------------------------------------------------------------------------------------------------------------------------------------------------------------------------------------------------------------------------------------------------------------------------------------------------------------------------------------------------------------------------------------------------------------------------------------------|----------------|--------------------------------------------|---|--------------------|---------|--------------------------------------|--------------------|---------|---------------------------------------------------------|--------------------|---------|--------------------------------------|--------------------|---------|-----------|--------------------------------|--|--|------------|------------------|--|--|---------------|--|--|------------------|--|------------|------------------|-----------|--|---------------|--|--|-----------------|--|------------|------------------|-------------|--|---------------|--|--|-----------------|--|------------|------------------|-----------|--|---------------|--|--|------------------|--|------------|--|--|--|----------|---|------------|------------|--|------------|------------|--------------|------------|------------|-------------|------------|------------|-----------|
|                                                                                                                                                                     |                                                                                                                                                                                                                               | (Elman 2011): median injections 2 in RPL group, 3 in RDL group; in TPL group 68% of eyes received at least 1 injection; at least one focal/grid laser sessions between 1 and 2 years: 51% CPL, 40% RPL, 29% RDL, 52% TPL<br>Laser Modified ETDRS protocol as used in prior DRCR.net protocols | <table border="1"> <thead> <tr> <th colspan="2">BCVA (letters)</th> <th>p</th> </tr> </thead> <tbody> <tr> <td><i>CPL (n=211)</i></td> <td>+3 SD15</td> <td></td> </tr> <tr> <td><i>RPL (n=136)</i></td> <td>+7 SD13</td> <td>0.03 vs CPL</td> </tr> <tr> <td><i>RDL (n=139)</i></td> <td>+9 SD14</td> <td>&lt;0.001 vs CPL</td> </tr> <tr> <td><i>TPL (n=142)</i></td> <td>+2 SD19</td> <td>NS vs CPL</td> </tr> </tbody> </table> <table border="1"> <thead> <tr> <th colspan="2">BCVA gain categories (letters)</th> <th></th> </tr> </thead> <tbody> <tr> <td><i>CPL</i></td> <td>+10 or more: 36%</td> <td></td> </tr> <tr> <td></td> <td>+9 to -9: 52%</td> <td></td> </tr> <tr> <td></td> <td>-10 or more: 13%</td> <td></td> </tr> <tr> <td><i>RPL</i></td> <td>+10 or more: 44%</td> <td>NS vs CPL</td> </tr> <tr> <td></td> <td>+9 to -9: 49%</td> <td></td> </tr> <tr> <td></td> <td>-10 or more: 7%</td> <td></td> </tr> <tr> <td><i>RDL</i></td> <td>+10 or more: 49%</td> <td>0.01 vs CPL</td> </tr> <tr> <td></td> <td>+9 to -9: 48%</td> <td></td> </tr> <tr> <td></td> <td>-10 or more: 3%</td> <td></td> </tr> <tr> <td><i>TPL</i></td> <td>+10 or more: 41%</td> <td>NS vs CPL</td> </tr> <tr> <td></td> <td>+9 to -9: 40%</td> <td></td> </tr> <tr> <td></td> <td>-10 or more: 19%</td> <td></td> </tr> </tbody> </table> <table border="1"> <thead> <tr> <th colspan="2">CMT (OCT):</th> <th></th> </tr> <tr> <th></th> <th>CMT (µm)</th> <th>p</th> </tr> </thead> <tbody> <tr> <td><i>CPL</i></td> <td>-138 SD149</td> <td></td> </tr> <tr> <td><i>RPL</i></td> <td>-141 SD155</td> <td>0.003 vs CPL</td> </tr> <tr> <td><i>RDL</i></td> <td>-150 SD143</td> <td>0.01 vs CPL</td> </tr> <tr> <td><i>TPL</i></td> <td>-107 SD145</td> <td>NS vs CPL</td> </tr> </tbody> </table> | BCVA (letters) |                                            | p | <i>CPL (n=211)</i> | +3 SD15 |                                      | <i>RPL (n=136)</i> | +7 SD13 | 0.03 vs CPL                                             | <i>RDL (n=139)</i> | +9 SD14 | <0.001 vs CPL                        | <i>TPL (n=142)</i> | +2 SD19 | NS vs CPL | BCVA gain categories (letters) |  |  | <i>CPL</i> | +10 or more: 36% |  |  | +9 to -9: 52% |  |  | -10 or more: 13% |  | <i>RPL</i> | +10 or more: 44% | NS vs CPL |  | +9 to -9: 49% |  |  | -10 or more: 7% |  | <i>RDL</i> | +10 or more: 49% | 0.01 vs CPL |  | +9 to -9: 48% |  |  | -10 or more: 3% |  | <i>TPL</i> | +10 or more: 41% | NS vs CPL |  | +9 to -9: 40% |  |  | -10 or more: 19% |  | CMT (OCT): |  |  |  | CMT (µm) | p | <i>CPL</i> | -138 SD149 |  | <i>RPL</i> | -141 SD155 | 0.003 vs CPL | <i>RDL</i> | -150 SD143 | 0.01 vs CPL | <i>TPL</i> | -107 SD145 | NS vs CPL |
| BCVA (letters)                                                                                                                                                      |                                                                                                                                                                                                                               | p                                                                                                                                                                                                                                                                                             |                                                                                                                                                                                                                                                                                                                                                                                                                                                                                                                                                                                                                                                                                                                                                                                                                                                                                                                                                                                                                                                                                                                                                                                                                                                                                                                                                                                                                                                                                                                                                                                                                                                                                                                                                                                                        |                |                                            |   |                    |         |                                      |                    |         |                                                         |                    |         |                                      |                    |         |           |                                |  |  |            |                  |  |  |               |  |  |                  |  |            |                  |           |  |               |  |  |                 |  |            |                  |             |  |               |  |  |                 |  |            |                  |           |  |               |  |  |                  |  |            |  |  |  |          |   |            |            |  |            |            |              |            |            |             |            |            |           |
| <i>CPL (n=211)</i>                                                                                                                                                  | +3 SD15                                                                                                                                                                                                                       |                                                                                                                                                                                                                                                                                               |                                                                                                                                                                                                                                                                                                                                                                                                                                                                                                                                                                                                                                                                                                                                                                                                                                                                                                                                                                                                                                                                                                                                                                                                                                                                                                                                                                                                                                                                                                                                                                                                                                                                                                                                                                                                        |                |                                            |   |                    |         |                                      |                    |         |                                                         |                    |         |                                      |                    |         |           |                                |  |  |            |                  |  |  |               |  |  |                  |  |            |                  |           |  |               |  |  |                 |  |            |                  |             |  |               |  |  |                 |  |            |                  |           |  |               |  |  |                  |  |            |  |  |  |          |   |            |            |  |            |            |              |            |            |             |            |            |           |
| <i>RPL (n=136)</i>                                                                                                                                                  | +7 SD13                                                                                                                                                                                                                       | 0.03 vs CPL                                                                                                                                                                                                                                                                                   |                                                                                                                                                                                                                                                                                                                                                                                                                                                                                                                                                                                                                                                                                                                                                                                                                                                                                                                                                                                                                                                                                                                                                                                                                                                                                                                                                                                                                                                                                                                                                                                                                                                                                                                                                                                                        |                |                                            |   |                    |         |                                      |                    |         |                                                         |                    |         |                                      |                    |         |           |                                |  |  |            |                  |  |  |               |  |  |                  |  |            |                  |           |  |               |  |  |                 |  |            |                  |             |  |               |  |  |                 |  |            |                  |           |  |               |  |  |                  |  |            |  |  |  |          |   |            |            |  |            |            |              |            |            |             |            |            |           |
| <i>RDL (n=139)</i>                                                                                                                                                  | +9 SD14                                                                                                                                                                                                                       | <0.001 vs CPL                                                                                                                                                                                                                                                                                 |                                                                                                                                                                                                                                                                                                                                                                                                                                                                                                                                                                                                                                                                                                                                                                                                                                                                                                                                                                                                                                                                                                                                                                                                                                                                                                                                                                                                                                                                                                                                                                                                                                                                                                                                                                                                        |                |                                            |   |                    |         |                                      |                    |         |                                                         |                    |         |                                      |                    |         |           |                                |  |  |            |                  |  |  |               |  |  |                  |  |            |                  |           |  |               |  |  |                 |  |            |                  |             |  |               |  |  |                 |  |            |                  |           |  |               |  |  |                  |  |            |  |  |  |          |   |            |            |  |            |            |              |            |            |             |            |            |           |
| <i>TPL (n=142)</i>                                                                                                                                                  | +2 SD19                                                                                                                                                                                                                       | NS vs CPL                                                                                                                                                                                                                                                                                     |                                                                                                                                                                                                                                                                                                                                                                                                                                                                                                                                                                                                                                                                                                                                                                                                                                                                                                                                                                                                                                                                                                                                                                                                                                                                                                                                                                                                                                                                                                                                                                                                                                                                                                                                                                                                        |                |                                            |   |                    |         |                                      |                    |         |                                                         |                    |         |                                      |                    |         |           |                                |  |  |            |                  |  |  |               |  |  |                  |  |            |                  |           |  |               |  |  |                 |  |            |                  |             |  |               |  |  |                 |  |            |                  |           |  |               |  |  |                  |  |            |  |  |  |          |   |            |            |  |            |            |              |            |            |             |            |            |           |
| BCVA gain categories (letters)                                                                                                                                      |                                                                                                                                                                                                                               |                                                                                                                                                                                                                                                                                               |                                                                                                                                                                                                                                                                                                                                                                                                                                                                                                                                                                                                                                                                                                                                                                                                                                                                                                                                                                                                                                                                                                                                                                                                                                                                                                                                                                                                                                                                                                                                                                                                                                                                                                                                                                                                        |                |                                            |   |                    |         |                                      |                    |         |                                                         |                    |         |                                      |                    |         |           |                                |  |  |            |                  |  |  |               |  |  |                  |  |            |                  |           |  |               |  |  |                 |  |            |                  |             |  |               |  |  |                 |  |            |                  |           |  |               |  |  |                  |  |            |  |  |  |          |   |            |            |  |            |            |              |            |            |             |            |            |           |
| <i>CPL</i>                                                                                                                                                          | +10 or more: 36%                                                                                                                                                                                                              |                                                                                                                                                                                                                                                                                               |                                                                                                                                                                                                                                                                                                                                                                                                                                                                                                                                                                                                                                                                                                                                                                                                                                                                                                                                                                                                                                                                                                                                                                                                                                                                                                                                                                                                                                                                                                                                                                                                                                                                                                                                                                                                        |                |                                            |   |                    |         |                                      |                    |         |                                                         |                    |         |                                      |                    |         |           |                                |  |  |            |                  |  |  |               |  |  |                  |  |            |                  |           |  |               |  |  |                 |  |            |                  |             |  |               |  |  |                 |  |            |                  |           |  |               |  |  |                  |  |            |  |  |  |          |   |            |            |  |            |            |              |            |            |             |            |            |           |
|                                                                                                                                                                     | +9 to -9: 52%                                                                                                                                                                                                                 |                                                                                                                                                                                                                                                                                               |                                                                                                                                                                                                                                                                                                                                                                                                                                                                                                                                                                                                                                                                                                                                                                                                                                                                                                                                                                                                                                                                                                                                                                                                                                                                                                                                                                                                                                                                                                                                                                                                                                                                                                                                                                                                        |                |                                            |   |                    |         |                                      |                    |         |                                                         |                    |         |                                      |                    |         |           |                                |  |  |            |                  |  |  |               |  |  |                  |  |            |                  |           |  |               |  |  |                 |  |            |                  |             |  |               |  |  |                 |  |            |                  |           |  |               |  |  |                  |  |            |  |  |  |          |   |            |            |  |            |            |              |            |            |             |            |            |           |
|                                                                                                                                                                     | -10 or more: 13%                                                                                                                                                                                                              |                                                                                                                                                                                                                                                                                               |                                                                                                                                                                                                                                                                                                                                                                                                                                                                                                                                                                                                                                                                                                                                                                                                                                                                                                                                                                                                                                                                                                                                                                                                                                                                                                                                                                                                                                                                                                                                                                                                                                                                                                                                                                                                        |                |                                            |   |                    |         |                                      |                    |         |                                                         |                    |         |                                      |                    |         |           |                                |  |  |            |                  |  |  |               |  |  |                  |  |            |                  |           |  |               |  |  |                 |  |            |                  |             |  |               |  |  |                 |  |            |                  |           |  |               |  |  |                  |  |            |  |  |  |          |   |            |            |  |            |            |              |            |            |             |            |            |           |
| <i>RPL</i>                                                                                                                                                          | +10 or more: 44%                                                                                                                                                                                                              | NS vs CPL                                                                                                                                                                                                                                                                                     |                                                                                                                                                                                                                                                                                                                                                                                                                                                                                                                                                                                                                                                                                                                                                                                                                                                                                                                                                                                                                                                                                                                                                                                                                                                                                                                                                                                                                                                                                                                                                                                                                                                                                                                                                                                                        |                |                                            |   |                    |         |                                      |                    |         |                                                         |                    |         |                                      |                    |         |           |                                |  |  |            |                  |  |  |               |  |  |                  |  |            |                  |           |  |               |  |  |                 |  |            |                  |             |  |               |  |  |                 |  |            |                  |           |  |               |  |  |                  |  |            |  |  |  |          |   |            |            |  |            |            |              |            |            |             |            |            |           |
|                                                                                                                                                                     | +9 to -9: 49%                                                                                                                                                                                                                 |                                                                                                                                                                                                                                                                                               |                                                                                                                                                                                                                                                                                                                                                                                                                                                                                                                                                                                                                                                                                                                                                                                                                                                                                                                                                                                                                                                                                                                                                                                                                                                                                                                                                                                                                                                                                                                                                                                                                                                                                                                                                                                                        |                |                                            |   |                    |         |                                      |                    |         |                                                         |                    |         |                                      |                    |         |           |                                |  |  |            |                  |  |  |               |  |  |                  |  |            |                  |           |  |               |  |  |                 |  |            |                  |             |  |               |  |  |                 |  |            |                  |           |  |               |  |  |                  |  |            |  |  |  |          |   |            |            |  |            |            |              |            |            |             |            |            |           |
|                                                                                                                                                                     | -10 or more: 7%                                                                                                                                                                                                               |                                                                                                                                                                                                                                                                                               |                                                                                                                                                                                                                                                                                                                                                                                                                                                                                                                                                                                                                                                                                                                                                                                                                                                                                                                                                                                                                                                                                                                                                                                                                                                                                                                                                                                                                                                                                                                                                                                                                                                                                                                                                                                                        |                |                                            |   |                    |         |                                      |                    |         |                                                         |                    |         |                                      |                    |         |           |                                |  |  |            |                  |  |  |               |  |  |                  |  |            |                  |           |  |               |  |  |                 |  |            |                  |             |  |               |  |  |                 |  |            |                  |           |  |               |  |  |                  |  |            |  |  |  |          |   |            |            |  |            |            |              |            |            |             |            |            |           |
| <i>RDL</i>                                                                                                                                                          | +10 or more: 49%                                                                                                                                                                                                              | 0.01 vs CPL                                                                                                                                                                                                                                                                                   |                                                                                                                                                                                                                                                                                                                                                                                                                                                                                                                                                                                                                                                                                                                                                                                                                                                                                                                                                                                                                                                                                                                                                                                                                                                                                                                                                                                                                                                                                                                                                                                                                                                                                                                                                                                                        |                |                                            |   |                    |         |                                      |                    |         |                                                         |                    |         |                                      |                    |         |           |                                |  |  |            |                  |  |  |               |  |  |                  |  |            |                  |           |  |               |  |  |                 |  |            |                  |             |  |               |  |  |                 |  |            |                  |           |  |               |  |  |                  |  |            |  |  |  |          |   |            |            |  |            |            |              |            |            |             |            |            |           |
|                                                                                                                                                                     | +9 to -9: 48%                                                                                                                                                                                                                 |                                                                                                                                                                                                                                                                                               |                                                                                                                                                                                                                                                                                                                                                                                                                                                                                                                                                                                                                                                                                                                                                                                                                                                                                                                                                                                                                                                                                                                                                                                                                                                                                                                                                                                                                                                                                                                                                                                                                                                                                                                                                                                                        |                |                                            |   |                    |         |                                      |                    |         |                                                         |                    |         |                                      |                    |         |           |                                |  |  |            |                  |  |  |               |  |  |                  |  |            |                  |           |  |               |  |  |                 |  |            |                  |             |  |               |  |  |                 |  |            |                  |           |  |               |  |  |                  |  |            |  |  |  |          |   |            |            |  |            |            |              |            |            |             |            |            |           |
|                                                                                                                                                                     | -10 or more: 3%                                                                                                                                                                                                               |                                                                                                                                                                                                                                                                                               |                                                                                                                                                                                                                                                                                                                                                                                                                                                                                                                                                                                                                                                                                                                                                                                                                                                                                                                                                                                                                                                                                                                                                                                                                                                                                                                                                                                                                                                                                                                                                                                                                                                                                                                                                                                                        |                |                                            |   |                    |         |                                      |                    |         |                                                         |                    |         |                                      |                    |         |           |                                |  |  |            |                  |  |  |               |  |  |                  |  |            |                  |           |  |               |  |  |                 |  |            |                  |             |  |               |  |  |                 |  |            |                  |           |  |               |  |  |                  |  |            |  |  |  |          |   |            |            |  |            |            |              |            |            |             |            |            |           |
| <i>TPL</i>                                                                                                                                                          | +10 or more: 41%                                                                                                                                                                                                              | NS vs CPL                                                                                                                                                                                                                                                                                     |                                                                                                                                                                                                                                                                                                                                                                                                                                                                                                                                                                                                                                                                                                                                                                                                                                                                                                                                                                                                                                                                                                                                                                                                                                                                                                                                                                                                                                                                                                                                                                                                                                                                                                                                                                                                        |                |                                            |   |                    |         |                                      |                    |         |                                                         |                    |         |                                      |                    |         |           |                                |  |  |            |                  |  |  |               |  |  |                  |  |            |                  |           |  |               |  |  |                 |  |            |                  |             |  |               |  |  |                 |  |            |                  |           |  |               |  |  |                  |  |            |  |  |  |          |   |            |            |  |            |            |              |            |            |             |            |            |           |
|                                                                                                                                                                     | +9 to -9: 40%                                                                                                                                                                                                                 |                                                                                                                                                                                                                                                                                               |                                                                                                                                                                                                                                                                                                                                                                                                                                                                                                                                                                                                                                                                                                                                                                                                                                                                                                                                                                                                                                                                                                                                                                                                                                                                                                                                                                                                                                                                                                                                                                                                                                                                                                                                                                                                        |                |                                            |   |                    |         |                                      |                    |         |                                                         |                    |         |                                      |                    |         |           |                                |  |  |            |                  |  |  |               |  |  |                  |  |            |                  |           |  |               |  |  |                 |  |            |                  |             |  |               |  |  |                 |  |            |                  |           |  |               |  |  |                  |  |            |  |  |  |          |   |            |            |  |            |            |              |            |            |             |            |            |           |
|                                                                                                                                                                     | -10 or more: 19%                                                                                                                                                                                                              |                                                                                                                                                                                                                                                                                               |                                                                                                                                                                                                                                                                                                                                                                                                                                                                                                                                                                                                                                                                                                                                                                                                                                                                                                                                                                                                                                                                                                                                                                                                                                                                                                                                                                                                                                                                                                                                                                                                                                                                                                                                                                                                        |                |                                            |   |                    |         |                                      |                    |         |                                                         |                    |         |                                      |                    |         |           |                                |  |  |            |                  |  |  |               |  |  |                  |  |            |                  |           |  |               |  |  |                 |  |            |                  |             |  |               |  |  |                 |  |            |                  |           |  |               |  |  |                  |  |            |  |  |  |          |   |            |            |  |            |            |              |            |            |             |            |            |           |
| CMT (OCT):                                                                                                                                                          |                                                                                                                                                                                                                               |                                                                                                                                                                                                                                                                                               |                                                                                                                                                                                                                                                                                                                                                                                                                                                                                                                                                                                                                                                                                                                                                                                                                                                                                                                                                                                                                                                                                                                                                                                                                                                                                                                                                                                                                                                                                                                                                                                                                                                                                                                                                                                                        |                |                                            |   |                    |         |                                      |                    |         |                                                         |                    |         |                                      |                    |         |           |                                |  |  |            |                  |  |  |               |  |  |                  |  |            |                  |           |  |               |  |  |                 |  |            |                  |             |  |               |  |  |                 |  |            |                  |           |  |               |  |  |                  |  |            |  |  |  |          |   |            |            |  |            |            |              |            |            |             |            |            |           |
|                                                                                                                                                                     | CMT (µm)                                                                                                                                                                                                                      | p                                                                                                                                                                                                                                                                                             |                                                                                                                                                                                                                                                                                                                                                                                                                                                                                                                                                                                                                                                                                                                                                                                                                                                                                                                                                                                                                                                                                                                                                                                                                                                                                                                                                                                                                                                                                                                                                                                                                                                                                                                                                                                                        |                |                                            |   |                    |         |                                      |                    |         |                                                         |                    |         |                                      |                    |         |           |                                |  |  |            |                  |  |  |               |  |  |                  |  |            |                  |           |  |               |  |  |                 |  |            |                  |             |  |               |  |  |                 |  |            |                  |           |  |               |  |  |                  |  |            |  |  |  |          |   |            |            |  |            |            |              |            |            |             |            |            |           |
| <i>CPL</i>                                                                                                                                                          | -138 SD149                                                                                                                                                                                                                    |                                                                                                                                                                                                                                                                                               |                                                                                                                                                                                                                                                                                                                                                                                                                                                                                                                                                                                                                                                                                                                                                                                                                                                                                                                                                                                                                                                                                                                                                                                                                                                                                                                                                                                                                                                                                                                                                                                                                                                                                                                                                                                                        |                |                                            |   |                    |         |                                      |                    |         |                                                         |                    |         |                                      |                    |         |           |                                |  |  |            |                  |  |  |               |  |  |                  |  |            |                  |           |  |               |  |  |                 |  |            |                  |             |  |               |  |  |                 |  |            |                  |           |  |               |  |  |                  |  |            |  |  |  |          |   |            |            |  |            |            |              |            |            |             |            |            |           |
| <i>RPL</i>                                                                                                                                                          | -141 SD155                                                                                                                                                                                                                    | 0.003 vs CPL                                                                                                                                                                                                                                                                                  |                                                                                                                                                                                                                                                                                                                                                                                                                                                                                                                                                                                                                                                                                                                                                                                                                                                                                                                                                                                                                                                                                                                                                                                                                                                                                                                                                                                                                                                                                                                                                                                                                                                                                                                                                                                                        |                |                                            |   |                    |         |                                      |                    |         |                                                         |                    |         |                                      |                    |         |           |                                |  |  |            |                  |  |  |               |  |  |                  |  |            |                  |           |  |               |  |  |                 |  |            |                  |             |  |               |  |  |                 |  |            |                  |           |  |               |  |  |                  |  |            |  |  |  |          |   |            |            |  |            |            |              |            |            |             |            |            |           |
| <i>RDL</i>                                                                                                                                                          | -150 SD143                                                                                                                                                                                                                    | 0.01 vs CPL                                                                                                                                                                                                                                                                                   |                                                                                                                                                                                                                                                                                                                                                                                                                                                                                                                                                                                                                                                                                                                                                                                                                                                                                                                                                                                                                                                                                                                                                                                                                                                                                                                                                                                                                                                                                                                                                                                                                                                                                                                                                                                                        |                |                                            |   |                    |         |                                      |                    |         |                                                         |                    |         |                                      |                    |         |           |                                |  |  |            |                  |  |  |               |  |  |                  |  |            |                  |           |  |               |  |  |                 |  |            |                  |             |  |               |  |  |                 |  |            |                  |           |  |               |  |  |                  |  |            |  |  |  |          |   |            |            |  |            |            |              |            |            |             |            |            |           |
| <i>TPL</i>                                                                                                                                                          | -107 SD145                                                                                                                                                                                                                    | NS vs CPL                                                                                                                                                                                                                                                                                     |                                                                                                                                                                                                                                                                                                                                                                                                                                                                                                                                                                                                                                                                                                                                                                                                                                                                                                                                                                                                                                                                                                                                                                                                                                                                                                                                                                                                                                                                                                                                                                                                                                                                                                                                                                                                        |                |                                            |   |                    |         |                                      |                    |         |                                                         |                    |         |                                      |                    |         |           |                                |  |  |            |                  |  |  |               |  |  |                  |  |            |                  |           |  |               |  |  |                 |  |            |                  |             |  |               |  |  |                 |  |            |                  |           |  |               |  |  |                  |  |            |  |  |  |          |   |            |            |  |            |            |              |            |            |             |            |            |           |
| <b>Jorge 201 Brazil</b> [51]<br><br>Design: Prospective RCT<br>Follow-up: 24 and 48 weeks [To date, 73% and 56% of patients completed 24 and 48 weeks respectively] | N: 63 eyes of 47 patients<br>Inclusion criteria: Refractory cener-involving DMO<br>Exclusion criteria: NR<br>Age: NR<br>Sex: NR<br>Diabetes type: NR<br>HbA1c: NR<br>Baseline VA: NR<br>Baseline CMT: NR<br>Comorbidities: NR | <b>Group 1 (IVB 1.5 mg, n=NR):</b> injections at baseline and monthly if CSFT (central subfield thickness) measured by SDOCT (spectral domain OCT) >275 µm.<br><b>Group 2 (IVR 0.5 mg, n=NR) :</b> injections at baseline and monthly if CSFT >275 µm.                                        | At 48 weeks<br><table border="1"> <thead> <tr> <th>BCVA</th> <th>Mean BCVA reduction from baseline (logMAR)</th> <th>p</th> </tr> </thead> <tbody> <tr> <td><i>IVB1.5</i></td> <td>-0.21</td> <td>vs baseline &lt;0.05 at all-time points</td> </tr> <tr> <td></td> <td></td> <td>vs IVR0.5: no significant difference at all time-points</td> </tr> <tr> <td><i>IVR0.5</i></td> <td>-0.21</td> <td>vs baseline &lt;0.05 at all time-points</td> </tr> </tbody> </table>                                                                                                                                                                                                                                                                                                                                                                                                                                                                                                                                                                                                                                                                                                                                                                                                                                                                                                                                                                                                                                                                                                                                                                                                                                                                                                                               | BCVA           | Mean BCVA reduction from baseline (logMAR) | p | <i>IVB1.5</i>      | -0.21   | vs baseline <0.05 at all-time points |                    |         | vs IVR0.5: no significant difference at all time-points | <i>IVR0.5</i>      | -0.21   | vs baseline <0.05 at all time-points |                    |         |           |                                |  |  |            |                  |  |  |               |  |  |                  |  |            |                  |           |  |               |  |  |                 |  |            |                  |             |  |               |  |  |                 |  |            |                  |           |  |               |  |  |                  |  |            |  |  |  |          |   |            |            |  |            |            |              |            |            |             |            |            |           |
| BCVA                                                                                                                                                                | Mean BCVA reduction from baseline (logMAR)                                                                                                                                                                                    | p                                                                                                                                                                                                                                                                                             |                                                                                                                                                                                                                                                                                                                                                                                                                                                                                                                                                                                                                                                                                                                                                                                                                                                                                                                                                                                                                                                                                                                                                                                                                                                                                                                                                                                                                                                                                                                                                                                                                                                                                                                                                                                                        |                |                                            |   |                    |         |                                      |                    |         |                                                         |                    |         |                                      |                    |         |           |                                |  |  |            |                  |  |  |               |  |  |                  |  |            |                  |           |  |               |  |  |                 |  |            |                  |             |  |               |  |  |                 |  |            |                  |           |  |               |  |  |                  |  |            |  |  |  |          |   |            |            |  |            |            |              |            |            |             |            |            |           |
| <i>IVB1.5</i>                                                                                                                                                       | -0.21                                                                                                                                                                                                                         | vs baseline <0.05 at all-time points                                                                                                                                                                                                                                                          |                                                                                                                                                                                                                                                                                                                                                                                                                                                                                                                                                                                                                                                                                                                                                                                                                                                                                                                                                                                                                                                                                                                                                                                                                                                                                                                                                                                                                                                                                                                                                                                                                                                                                                                                                                                                        |                |                                            |   |                    |         |                                      |                    |         |                                                         |                    |         |                                      |                    |         |           |                                |  |  |            |                  |  |  |               |  |  |                  |  |            |                  |           |  |               |  |  |                 |  |            |                  |             |  |               |  |  |                 |  |            |                  |           |  |               |  |  |                  |  |            |  |  |  |          |   |            |            |  |            |            |              |            |            |             |            |            |           |
|                                                                                                                                                                     |                                                                                                                                                                                                                               | vs IVR0.5: no significant difference at all time-points                                                                                                                                                                                                                                       |                                                                                                                                                                                                                                                                                                                                                                                                                                                                                                                                                                                                                                                                                                                                                                                                                                                                                                                                                                                                                                                                                                                                                                                                                                                                                                                                                                                                                                                                                                                                                                                                                                                                                                                                                                                                        |                |                                            |   |                    |         |                                      |                    |         |                                                         |                    |         |                                      |                    |         |           |                                |  |  |            |                  |  |  |               |  |  |                  |  |            |                  |           |  |               |  |  |                 |  |            |                  |             |  |               |  |  |                 |  |            |                  |           |  |               |  |  |                  |  |            |  |  |  |          |   |            |            |  |            |            |              |            |            |             |            |            |           |
| <i>IVR0.5</i>                                                                                                                                                       | -0.21                                                                                                                                                                                                                         | vs baseline <0.05 at all time-points                                                                                                                                                                                                                                                          |                                                                                                                                                                                                                                                                                                                                                                                                                                                                                                                                                                                                                                                                                                                                                                                                                                                                                                                                                                                                                                                                                                                                                                                                                                                                                                                                                                                                                                                                                                                                                                                                                                                                                                                                                                                                        |                |                                            |   |                    |         |                                      |                    |         |                                                         |                    |         |                                      |                    |         |           |                                |  |  |            |                  |  |  |               |  |  |                  |  |            |                  |           |  |               |  |  |                 |  |            |                  |             |  |               |  |  |                 |  |            |                  |           |  |               |  |  |                  |  |            |  |  |  |          |   |            |            |  |            |            |              |            |            |             |            |            |           |

1  
2  
3  
4  
5  
6  
7  
8  
9  
10  
11  
12  
13  
14  
15  
16  
17  
18  
19  
20  
21  
22  
23  
24  
25  
26  
27  
28  
29  
30  
31  
32  
33  
34  
35  
36  
37  
38  
39  
40  
41  
42  
43  
44  
45  
46  
47  
48  
49

| Study                                                                                                       | Participants and baseline values                                                                                                                                                                                                                                                                                                                                                                                                                                                                                                                                                                                                                                                                                                                                                                                                                                    | Intervention                                                                                                                                                                                                                                                                                                                                                                                                                                                                                                                                                                                                          | Outcome (change from baseline at study end)                                                                                                                                                                                                                                                                                                                                                                                                                                                                                                                                                                                                                                   |  |                                   |   |                |                |                                      |               |                |                                                                                                |            |       |  |                |   |                |      |       |            |      |                  |            |      |
|-------------------------------------------------------------------------------------------------------------|---------------------------------------------------------------------------------------------------------------------------------------------------------------------------------------------------------------------------------------------------------------------------------------------------------------------------------------------------------------------------------------------------------------------------------------------------------------------------------------------------------------------------------------------------------------------------------------------------------------------------------------------------------------------------------------------------------------------------------------------------------------------------------------------------------------------------------------------------------------------|-----------------------------------------------------------------------------------------------------------------------------------------------------------------------------------------------------------------------------------------------------------------------------------------------------------------------------------------------------------------------------------------------------------------------------------------------------------------------------------------------------------------------------------------------------------------------------------------------------------------------|-------------------------------------------------------------------------------------------------------------------------------------------------------------------------------------------------------------------------------------------------------------------------------------------------------------------------------------------------------------------------------------------------------------------------------------------------------------------------------------------------------------------------------------------------------------------------------------------------------------------------------------------------------------------------------|--|-----------------------------------|---|----------------|----------------|--------------------------------------|---------------|----------------|------------------------------------------------------------------------------------------------|------------|-------|--|----------------|---|----------------|------|-------|------------|------|------------------|------------|------|
|                                                                                                             |                                                                                                                                                                                                                                                                                                                                                                                                                                                                                                                                                                                                                                                                                                                                                                                                                                                                     |                                                                                                                                                                                                                                                                                                                                                                                                                                                                                                                                                                                                                       | <p>vs IVB1.5: no significant difference at all time-points</p> <hr/> <p><b>CSFT</b></p> <table border="1"> <thead> <tr> <th></th> <th>Mean CSFT reduction from baseline</th> <th>p</th> </tr> </thead> <tbody> <tr> <td><i>IVB1.5</i></td> <td>-129.6 <math>\mu</math>m</td> <td>vs baseline &lt;0.05 at all-time points</td> </tr> <tr> <td><i>IVR0.5</i></td> <td>-137.9 <math>\mu</math>m</td> <td>vs IVR0.5 no significant difference at all-time points<br/>vs baseline &lt;0.05 at all-time points</td> </tr> </tbody> </table> <p>vs IVB1.5 no significant difference at all-time points</p>                                                                           |  | Mean CSFT reduction from baseline | p | <i>IVB1.5</i>  | -129.6 $\mu$ m | vs baseline <0.05 at all-time points | <i>IVR0.5</i> | -137.9 $\mu$ m | vs IVR0.5 no significant difference at all-time points<br>vs baseline <0.05 at all-time points |            |       |  |                |   |                |      |       |            |      |                  |            |      |
|                                                                                                             | Mean CSFT reduction from baseline                                                                                                                                                                                                                                                                                                                                                                                                                                                                                                                                                                                                                                                                                                                                                                                                                                   | p                                                                                                                                                                                                                                                                                                                                                                                                                                                                                                                                                                                                                     |                                                                                                                                                                                                                                                                                                                                                                                                                                                                                                                                                                                                                                                                               |  |                                   |   |                |                |                                      |               |                |                                                                                                |            |       |  |                |   |                |      |       |            |      |                  |            |      |
| <i>IVB1.5</i>                                                                                               | -129.6 $\mu$ m                                                                                                                                                                                                                                                                                                                                                                                                                                                                                                                                                                                                                                                                                                                                                                                                                                                      | vs baseline <0.05 at all-time points                                                                                                                                                                                                                                                                                                                                                                                                                                                                                                                                                                                  |                                                                                                                                                                                                                                                                                                                                                                                                                                                                                                                                                                                                                                                                               |  |                                   |   |                |                |                                      |               |                |                                                                                                |            |       |  |                |   |                |      |       |            |      |                  |            |      |
| <i>IVR0.5</i>                                                                                               | -137.9 $\mu$ m                                                                                                                                                                                                                                                                                                                                                                                                                                                                                                                                                                                                                                                                                                                                                                                                                                                      | vs IVR0.5 no significant difference at all-time points<br>vs baseline <0.05 at all-time points                                                                                                                                                                                                                                                                                                                                                                                                                                                                                                                        |                                                                                                                                                                                                                                                                                                                                                                                                                                                                                                                                                                                                                                                                               |  |                                   |   |                |                |                                      |               |                |                                                                                                |            |       |  |                |   |                |      |       |            |      |                  |            |      |
| <p><b>Lim 2012</b>[55]<br/><b>Korea</b></p> <p><b>Design:</b> 3-arm RCT<br/><b>Follow-up:</b> 12 months</p> | <p><b>N:</b> 111 eyes of 105 patients<br/><b>Inclusion criteria:</b> eyes with clinically significant DMO based on ETDRS and DMO with central macular thickness of at least 300 <math>\mu</math>m by optical coherence tomography (OCT).<br/><b>Exclusion criteria:</b> unstable medical status, including glycemic control and blood pressure; any previous treatment for DMO, including intravitreal, sub-Tenon injection or macular photocoagulation, history of vitreoretinal surgery, uncontrolled glaucoma; proliferative diabetic retinopathy with active neovascularization, previous panretinal photocoagulation, presence of vitreomacular traction, history of systemic corticosteroids within 6 months, contraindications for bevacizumab or triamcinolone acetonide.<br/><b>Age:</b> 60.4 SD 7.4 (range 48 to 70) years<br/><b>Sex:</b> 52% female</p> | <p><b>Group 1 (IVB/IVT, n=36):</b> IV injection of 1.25 mg (0.05 ml) IVB at 0 and 6 weeks and IV injection of 2 mg (0.05 ml) IVT at 0 weeks. Mean number of addition injection 1.28<br/><b>Group 2 (IVB, n=38):</b> IV injection of 1.25 mg (0.05 ml) IVB at 0 and 6 weeks. Mean number of injections 2.54.<br/><b>Group 3 (IVT, n=37):</b> IV injection of 2 mg (0.05 ml) IVT at 0 weeks. Mean number of injections 1.04</p> <p><b>Unclear if rescue laser was available</b></p> <p><b>IVB injections were repeated if CMT appeared &gt;300 <math>\mu</math>m on OCT in at least 6-weeks in all three groups</b></p> | <p>At 12 months</p> <table border="1"> <thead> <tr> <th></th> <th>BCVA (logMAR)</th> <th>p</th> </tr> </thead> <tbody> <tr> <td><i>IVB/IVT</i></td> <td>-0.15</td> <td>0.088</td> </tr> <tr> <td><i>IVB</i></td> <td>-0.16</td> <td rowspan="2">(between groups)</td> </tr> <tr> <td><i>IVT</i></td> <td>-0.16</td> </tr> </tbody> </table><br><table border="1"> <thead> <tr> <th></th> <th>CMT (<math>\mu</math>m)</th> <th>p</th> </tr> </thead> <tbody> <tr> <td><i>IVB/IVT</i></td> <td>-199</td> <td>0.132</td> </tr> <tr> <td><i>IVB</i></td> <td>-179</td> <td rowspan="2">(between groups)</td> </tr> <tr> <td><i>IVT</i></td> <td>-200</td> </tr> </tbody> </table> |  | BCVA (logMAR)                     | p | <i>IVB/IVT</i> | -0.15          | 0.088                                | <i>IVB</i>    | -0.16          | (between groups)                                                                               | <i>IVT</i> | -0.16 |  | CMT ( $\mu$ m) | p | <i>IVB/IVT</i> | -199 | 0.132 | <i>IVB</i> | -179 | (between groups) | <i>IVT</i> | -200 |
|                                                                                                             | BCVA (logMAR)                                                                                                                                                                                                                                                                                                                                                                                                                                                                                                                                                                                                                                                                                                                                                                                                                                                       | p                                                                                                                                                                                                                                                                                                                                                                                                                                                                                                                                                                                                                     |                                                                                                                                                                                                                                                                                                                                                                                                                                                                                                                                                                                                                                                                               |  |                                   |   |                |                |                                      |               |                |                                                                                                |            |       |  |                |   |                |      |       |            |      |                  |            |      |
| <i>IVB/IVT</i>                                                                                              | -0.15                                                                                                                                                                                                                                                                                                                                                                                                                                                                                                                                                                                                                                                                                                                                                                                                                                                               | 0.088                                                                                                                                                                                                                                                                                                                                                                                                                                                                                                                                                                                                                 |                                                                                                                                                                                                                                                                                                                                                                                                                                                                                                                                                                                                                                                                               |  |                                   |   |                |                |                                      |               |                |                                                                                                |            |       |  |                |   |                |      |       |            |      |                  |            |      |
| <i>IVB</i>                                                                                                  | -0.16                                                                                                                                                                                                                                                                                                                                                                                                                                                                                                                                                                                                                                                                                                                                                                                                                                                               | (between groups)                                                                                                                                                                                                                                                                                                                                                                                                                                                                                                                                                                                                      |                                                                                                                                                                                                                                                                                                                                                                                                                                                                                                                                                                                                                                                                               |  |                                   |   |                |                |                                      |               |                |                                                                                                |            |       |  |                |   |                |      |       |            |      |                  |            |      |
| <i>IVT</i>                                                                                                  | -0.16                                                                                                                                                                                                                                                                                                                                                                                                                                                                                                                                                                                                                                                                                                                                                                                                                                                               |                                                                                                                                                                                                                                                                                                                                                                                                                                                                                                                                                                                                                       |                                                                                                                                                                                                                                                                                                                                                                                                                                                                                                                                                                                                                                                                               |  |                                   |   |                |                |                                      |               |                |                                                                                                |            |       |  |                |   |                |      |       |            |      |                  |            |      |
|                                                                                                             | CMT ( $\mu$ m)                                                                                                                                                                                                                                                                                                                                                                                                                                                                                                                                                                                                                                                                                                                                                                                                                                                      | p                                                                                                                                                                                                                                                                                                                                                                                                                                                                                                                                                                                                                     |                                                                                                                                                                                                                                                                                                                                                                                                                                                                                                                                                                                                                                                                               |  |                                   |   |                |                |                                      |               |                |                                                                                                |            |       |  |                |   |                |      |       |            |      |                  |            |      |
| <i>IVB/IVT</i>                                                                                              | -199                                                                                                                                                                                                                                                                                                                                                                                                                                                                                                                                                                                                                                                                                                                                                                                                                                                                | 0.132                                                                                                                                                                                                                                                                                                                                                                                                                                                                                                                                                                                                                 |                                                                                                                                                                                                                                                                                                                                                                                                                                                                                                                                                                                                                                                                               |  |                                   |   |                |                |                                      |               |                |                                                                                                |            |       |  |                |   |                |      |       |            |      |                  |            |      |
| <i>IVB</i>                                                                                                  | -179                                                                                                                                                                                                                                                                                                                                                                                                                                                                                                                                                                                                                                                                                                                                                                                                                                                                | (between groups)                                                                                                                                                                                                                                                                                                                                                                                                                                                                                                                                                                                                      |                                                                                                                                                                                                                                                                                                                                                                                                                                                                                                                                                                                                                                                                               |  |                                   |   |                |                |                                      |               |                |                                                                                                |            |       |  |                |   |                |      |       |            |      |                  |            |      |
| <i>IVT</i>                                                                                                  | -200                                                                                                                                                                                                                                                                                                                                                                                                                                                                                                                                                                                                                                                                                                                                                                                                                                                                |                                                                                                                                                                                                                                                                                                                                                                                                                                                                                                                                                                                                                       |                                                                                                                                                                                                                                                                                                                                                                                                                                                                                                                                                                                                                                                                               |  |                                   |   |                |                |                                      |               |                |                                                                                                |            |       |  |                |   |                |      |       |            |      |                  |            |      |

| Study                                                                                                                                                                                                                                                                             | Participants and baseline values                                                                                                                                                                                                                                                                                                                                                                                                                                                                                                                                                                                                                                                                                                                                                                                                                                                                                                                                                                                                                                       | Intervention                                                                                                                                                                                                                                                                                                                                                                                                                                                                                                                     | Outcome (change from baseline at study end)                                                                                                                                                                                                                                                                                                                                                                                                                                                                                                                                                                                                                                                                                                                                                                                                                                                                                                                                                                                                                                                                                                                                                                                                                                                                                                                                                                                                                                                                                                                                                                                                                                                                                                                                                                                                                                                                              |  |                   |   |            |                                      |                         |                |                                     |           |            |                                       |  |            |                         |                   |  |                              |  |                        |                |                         |  |  |                              |  |                         |            |                         |  |  |                              |  |                         |  |                    |   |            |           |                                      |                |          |  |            |         |  |
|-----------------------------------------------------------------------------------------------------------------------------------------------------------------------------------------------------------------------------------------------------------------------------------|------------------------------------------------------------------------------------------------------------------------------------------------------------------------------------------------------------------------------------------------------------------------------------------------------------------------------------------------------------------------------------------------------------------------------------------------------------------------------------------------------------------------------------------------------------------------------------------------------------------------------------------------------------------------------------------------------------------------------------------------------------------------------------------------------------------------------------------------------------------------------------------------------------------------------------------------------------------------------------------------------------------------------------------------------------------------|----------------------------------------------------------------------------------------------------------------------------------------------------------------------------------------------------------------------------------------------------------------------------------------------------------------------------------------------------------------------------------------------------------------------------------------------------------------------------------------------------------------------------------|--------------------------------------------------------------------------------------------------------------------------------------------------------------------------------------------------------------------------------------------------------------------------------------------------------------------------------------------------------------------------------------------------------------------------------------------------------------------------------------------------------------------------------------------------------------------------------------------------------------------------------------------------------------------------------------------------------------------------------------------------------------------------------------------------------------------------------------------------------------------------------------------------------------------------------------------------------------------------------------------------------------------------------------------------------------------------------------------------------------------------------------------------------------------------------------------------------------------------------------------------------------------------------------------------------------------------------------------------------------------------------------------------------------------------------------------------------------------------------------------------------------------------------------------------------------------------------------------------------------------------------------------------------------------------------------------------------------------------------------------------------------------------------------------------------------------------------------------------------------------------------------------------------------------------|--|-------------------|---|------------|--------------------------------------|-------------------------|----------------|-------------------------------------|-----------|------------|---------------------------------------|--|------------|-------------------------|-------------------|--|------------------------------|--|------------------------|----------------|-------------------------|--|--|------------------------------|--|-------------------------|------------|-------------------------|--|--|------------------------------|--|-------------------------|--|--------------------|---|------------|-----------|--------------------------------------|----------------|----------|--|------------|---------|--|
| <p><b>Soheilian 2007 / Soheilian 2009/ Soheilian 2011/ Soheilian 2012</b><br/>[37,41,54,141]<br/><b>Iran</b></p> <p><b>Design:</b> 3-arm RCT<br/><b>Follow-up:</b> 36 weeks</p> <p>[Soheilian 2007 reports 12 week results of the same trial, these were not considered here]</p> | <p><b>Diabetes type:</b> NR<br/><b>HbA1c:</b> 7.2 SD 1.2 to 7.4 SD1.2<br/><b>Baseline VA:</b> 0.62 SD 0.23 to 0.65 SD 0.28 logMAR<br/><b>Baseline CMT:</b> 447 SD 110 to 458 SD 92 <math>\mu</math>m<br/><b>Comorbidities:</b> NR</p> <p><b>N:</b> 150 eyes of 129 patients<br/><b>Inclusion criteria:</b> eyes with clinically significant DMO (ETDRS criteria)<br/><b>Exclusion criteria:</b> previous panretinal of focal laser photocoagulation, prior ocular surgery or injection, history of glaucoma or ocular hypertension, VA <math>\geq</math>20/40 or <math>&lt;</math>20/300, iris neovascularization, high risk PDR, significant media opacity, monocularly, pregnancy, serum creatinine <math>\geq</math>3 mg/dL, uncontrolled DM<br/><b>Age:</b> 61.2 SD6.1 years<br/><b>Sex:</b> 47.3% female<br/><b>Diabetes type:</b> not reported<br/><b>HbA1c:</b> not reported<br/><b>Baseline VA:</b> 0.55 to 0.73 SD0.26 to 0.28 logMAR<br/><b>Baseline CMT:</b> 300 to 359 SD118 to 149 <math>\mu</math>m<br/><b>Comorbidities:</b> 94% NPDR, 6% early PDR</p> | <p><b>Group 1 (IVB, n=50 eyes):</b> IV injection of bevacizumab 1.25 mg (0.05 ml) (retreatment IVB 14 eyes)<br/><b>Group 2 (IVB/IVT, n=50 eyes):</b> IV injection of combined bevacizumab (1.25 mg (0.05 ml)) and triamcinolone (2 mg (0.05 ml)), followed by two injections of bevacizumab alone (retreatment IVB/IVT 10 eyes)<br/><b>Group 3 (MPC, n=50 eyes):</b> focal or modified grid laser (retreatment MPC 3 eyes)</p> <p><b>Regimen for all groups:</b><br/>Retreatments performed at 12 week intervals as required</p> | <p><b>At 36 weeks</b></p> <p><b>BCVA (Snellen chart):</b></p> <table border="1"> <thead> <tr> <th></th> <th>BCVA (logMAR), SD</th> <th>p</th> </tr> </thead> <tbody> <tr> <td><b>IVB</b></td> <td>-0.28 SD0.25<br/>[+14 SD12.5 letters]</td> <td>0.053 vs IVB/IVT or MPC</td> </tr> <tr> <td><b>IVB/IVT</b></td> <td>-0.04 SD0.33<br/>[+2 SD16.5 letters]</td> <td>NS vs MPC</td> </tr> <tr> <td><b>MPC</b></td> <td>+0.01 SD0.27<br/>[-0.5 SD13.5 letters]</td> <td></td> </tr> </tbody> </table> <p><b>Snellen line changes</b></p> <table border="1"> <tbody> <tr> <td><b>IVB</b></td> <td>+2 lines or more: 37.0%</td> <td rowspan="3">NS between groups</td> </tr> <tr> <td></td> <td>stable within 2 lines: 59.3%</td> </tr> <tr> <td></td> <td>-2 lines or more: 3.7%</td> </tr> <tr> <td><b>IVB/IVT</b></td> <td>+2 lines or more: 25.0%</td> <td rowspan="3"></td> </tr> <tr> <td></td> <td>stable within 2 lines: 54.2%</td> </tr> <tr> <td></td> <td>-2 lines or more: 20.8%</td> </tr> <tr> <td><b>MPC</b></td> <td>+2 lines or more: 14.8%</td> <td rowspan="3"></td> </tr> <tr> <td></td> <td>stable within 2 lines: 66.7%</td> </tr> <tr> <td></td> <td>-2 lines or more: 18.5%</td> </tr> </tbody> </table> <p><b>CMT (OCT):</b></p> <table border="1"> <thead> <tr> <th></th> <th>CMT (<math>\mu</math>m), SD</th> <th>p</th> </tr> </thead> <tbody> <tr> <td><b>IVB</b></td> <td>-56 SD140</td> <td>0.044 vs baseline, NS between groups</td> </tr> <tr> <td><b>IVB/IVT</b></td> <td>-5 SD113</td> <td></td> </tr> <tr> <td><b>MPC</b></td> <td>-8 SD67</td> <td></td> </tr> </tbody> </table> <p>Subgroups:</p> <ul style="list-style-type: none"> <li>larger CMT reduction in subgroup with <math>\geq</math>400 <math>\mu</math>m at baseline (36 weeks: IVB -27.2 SD34.8%, IVB/IVT -8.8 SD35.9%, MPC -15.1 SD14.6%, <math>p&lt;</math>0.001 versus baseline in IVB and MPC groups only)</li> </ul> |  | BCVA (logMAR), SD | p | <b>IVB</b> | -0.28 SD0.25<br>[+14 SD12.5 letters] | 0.053 vs IVB/IVT or MPC | <b>IVB/IVT</b> | -0.04 SD0.33<br>[+2 SD16.5 letters] | NS vs MPC | <b>MPC</b> | +0.01 SD0.27<br>[-0.5 SD13.5 letters] |  | <b>IVB</b> | +2 lines or more: 37.0% | NS between groups |  | stable within 2 lines: 59.3% |  | -2 lines or more: 3.7% | <b>IVB/IVT</b> | +2 lines or more: 25.0% |  |  | stable within 2 lines: 54.2% |  | -2 lines or more: 20.8% | <b>MPC</b> | +2 lines or more: 14.8% |  |  | stable within 2 lines: 66.7% |  | -2 lines or more: 18.5% |  | CMT ( $\mu$ m), SD | p | <b>IVB</b> | -56 SD140 | 0.044 vs baseline, NS between groups | <b>IVB/IVT</b> | -5 SD113 |  | <b>MPC</b> | -8 SD67 |  |
|                                                                                                                                                                                                                                                                                   | BCVA (logMAR), SD                                                                                                                                                                                                                                                                                                                                                                                                                                                                                                                                                                                                                                                                                                                                                                                                                                                                                                                                                                                                                                                      | p                                                                                                                                                                                                                                                                                                                                                                                                                                                                                                                                |                                                                                                                                                                                                                                                                                                                                                                                                                                                                                                                                                                                                                                                                                                                                                                                                                                                                                                                                                                                                                                                                                                                                                                                                                                                                                                                                                                                                                                                                                                                                                                                                                                                                                                                                                                                                                                                                                                                          |  |                   |   |            |                                      |                         |                |                                     |           |            |                                       |  |            |                         |                   |  |                              |  |                        |                |                         |  |  |                              |  |                         |            |                         |  |  |                              |  |                         |  |                    |   |            |           |                                      |                |          |  |            |         |  |
| <b>IVB</b>                                                                                                                                                                                                                                                                        | -0.28 SD0.25<br>[+14 SD12.5 letters]                                                                                                                                                                                                                                                                                                                                                                                                                                                                                                                                                                                                                                                                                                                                                                                                                                                                                                                                                                                                                                   | 0.053 vs IVB/IVT or MPC                                                                                                                                                                                                                                                                                                                                                                                                                                                                                                          |                                                                                                                                                                                                                                                                                                                                                                                                                                                                                                                                                                                                                                                                                                                                                                                                                                                                                                                                                                                                                                                                                                                                                                                                                                                                                                                                                                                                                                                                                                                                                                                                                                                                                                                                                                                                                                                                                                                          |  |                   |   |            |                                      |                         |                |                                     |           |            |                                       |  |            |                         |                   |  |                              |  |                        |                |                         |  |  |                              |  |                         |            |                         |  |  |                              |  |                         |  |                    |   |            |           |                                      |                |          |  |            |         |  |
| <b>IVB/IVT</b>                                                                                                                                                                                                                                                                    | -0.04 SD0.33<br>[+2 SD16.5 letters]                                                                                                                                                                                                                                                                                                                                                                                                                                                                                                                                                                                                                                                                                                                                                                                                                                                                                                                                                                                                                                    | NS vs MPC                                                                                                                                                                                                                                                                                                                                                                                                                                                                                                                        |                                                                                                                                                                                                                                                                                                                                                                                                                                                                                                                                                                                                                                                                                                                                                                                                                                                                                                                                                                                                                                                                                                                                                                                                                                                                                                                                                                                                                                                                                                                                                                                                                                                                                                                                                                                                                                                                                                                          |  |                   |   |            |                                      |                         |                |                                     |           |            |                                       |  |            |                         |                   |  |                              |  |                        |                |                         |  |  |                              |  |                         |            |                         |  |  |                              |  |                         |  |                    |   |            |           |                                      |                |          |  |            |         |  |
| <b>MPC</b>                                                                                                                                                                                                                                                                        | +0.01 SD0.27<br>[-0.5 SD13.5 letters]                                                                                                                                                                                                                                                                                                                                                                                                                                                                                                                                                                                                                                                                                                                                                                                                                                                                                                                                                                                                                                  |                                                                                                                                                                                                                                                                                                                                                                                                                                                                                                                                  |                                                                                                                                                                                                                                                                                                                                                                                                                                                                                                                                                                                                                                                                                                                                                                                                                                                                                                                                                                                                                                                                                                                                                                                                                                                                                                                                                                                                                                                                                                                                                                                                                                                                                                                                                                                                                                                                                                                          |  |                   |   |            |                                      |                         |                |                                     |           |            |                                       |  |            |                         |                   |  |                              |  |                        |                |                         |  |  |                              |  |                         |            |                         |  |  |                              |  |                         |  |                    |   |            |           |                                      |                |          |  |            |         |  |
| <b>IVB</b>                                                                                                                                                                                                                                                                        | +2 lines or more: 37.0%                                                                                                                                                                                                                                                                                                                                                                                                                                                                                                                                                                                                                                                                                                                                                                                                                                                                                                                                                                                                                                                | NS between groups                                                                                                                                                                                                                                                                                                                                                                                                                                                                                                                |                                                                                                                                                                                                                                                                                                                                                                                                                                                                                                                                                                                                                                                                                                                                                                                                                                                                                                                                                                                                                                                                                                                                                                                                                                                                                                                                                                                                                                                                                                                                                                                                                                                                                                                                                                                                                                                                                                                          |  |                   |   |            |                                      |                         |                |                                     |           |            |                                       |  |            |                         |                   |  |                              |  |                        |                |                         |  |  |                              |  |                         |            |                         |  |  |                              |  |                         |  |                    |   |            |           |                                      |                |          |  |            |         |  |
|                                                                                                                                                                                                                                                                                   | stable within 2 lines: 59.3%                                                                                                                                                                                                                                                                                                                                                                                                                                                                                                                                                                                                                                                                                                                                                                                                                                                                                                                                                                                                                                           |                                                                                                                                                                                                                                                                                                                                                                                                                                                                                                                                  |                                                                                                                                                                                                                                                                                                                                                                                                                                                                                                                                                                                                                                                                                                                                                                                                                                                                                                                                                                                                                                                                                                                                                                                                                                                                                                                                                                                                                                                                                                                                                                                                                                                                                                                                                                                                                                                                                                                          |  |                   |   |            |                                      |                         |                |                                     |           |            |                                       |  |            |                         |                   |  |                              |  |                        |                |                         |  |  |                              |  |                         |            |                         |  |  |                              |  |                         |  |                    |   |            |           |                                      |                |          |  |            |         |  |
|                                                                                                                                                                                                                                                                                   | -2 lines or more: 3.7%                                                                                                                                                                                                                                                                                                                                                                                                                                                                                                                                                                                                                                                                                                                                                                                                                                                                                                                                                                                                                                                 |                                                                                                                                                                                                                                                                                                                                                                                                                                                                                                                                  |                                                                                                                                                                                                                                                                                                                                                                                                                                                                                                                                                                                                                                                                                                                                                                                                                                                                                                                                                                                                                                                                                                                                                                                                                                                                                                                                                                                                                                                                                                                                                                                                                                                                                                                                                                                                                                                                                                                          |  |                   |   |            |                                      |                         |                |                                     |           |            |                                       |  |            |                         |                   |  |                              |  |                        |                |                         |  |  |                              |  |                         |            |                         |  |  |                              |  |                         |  |                    |   |            |           |                                      |                |          |  |            |         |  |
| <b>IVB/IVT</b>                                                                                                                                                                                                                                                                    | +2 lines or more: 25.0%                                                                                                                                                                                                                                                                                                                                                                                                                                                                                                                                                                                                                                                                                                                                                                                                                                                                                                                                                                                                                                                |                                                                                                                                                                                                                                                                                                                                                                                                                                                                                                                                  |                                                                                                                                                                                                                                                                                                                                                                                                                                                                                                                                                                                                                                                                                                                                                                                                                                                                                                                                                                                                                                                                                                                                                                                                                                                                                                                                                                                                                                                                                                                                                                                                                                                                                                                                                                                                                                                                                                                          |  |                   |   |            |                                      |                         |                |                                     |           |            |                                       |  |            |                         |                   |  |                              |  |                        |                |                         |  |  |                              |  |                         |            |                         |  |  |                              |  |                         |  |                    |   |            |           |                                      |                |          |  |            |         |  |
|                                                                                                                                                                                                                                                                                   | stable within 2 lines: 54.2%                                                                                                                                                                                                                                                                                                                                                                                                                                                                                                                                                                                                                                                                                                                                                                                                                                                                                                                                                                                                                                           |                                                                                                                                                                                                                                                                                                                                                                                                                                                                                                                                  |                                                                                                                                                                                                                                                                                                                                                                                                                                                                                                                                                                                                                                                                                                                                                                                                                                                                                                                                                                                                                                                                                                                                                                                                                                                                                                                                                                                                                                                                                                                                                                                                                                                                                                                                                                                                                                                                                                                          |  |                   |   |            |                                      |                         |                |                                     |           |            |                                       |  |            |                         |                   |  |                              |  |                        |                |                         |  |  |                              |  |                         |            |                         |  |  |                              |  |                         |  |                    |   |            |           |                                      |                |          |  |            |         |  |
|                                                                                                                                                                                                                                                                                   | -2 lines or more: 20.8%                                                                                                                                                                                                                                                                                                                                                                                                                                                                                                                                                                                                                                                                                                                                                                                                                                                                                                                                                                                                                                                |                                                                                                                                                                                                                                                                                                                                                                                                                                                                                                                                  |                                                                                                                                                                                                                                                                                                                                                                                                                                                                                                                                                                                                                                                                                                                                                                                                                                                                                                                                                                                                                                                                                                                                                                                                                                                                                                                                                                                                                                                                                                                                                                                                                                                                                                                                                                                                                                                                                                                          |  |                   |   |            |                                      |                         |                |                                     |           |            |                                       |  |            |                         |                   |  |                              |  |                        |                |                         |  |  |                              |  |                         |            |                         |  |  |                              |  |                         |  |                    |   |            |           |                                      |                |          |  |            |         |  |
| <b>MPC</b>                                                                                                                                                                                                                                                                        | +2 lines or more: 14.8%                                                                                                                                                                                                                                                                                                                                                                                                                                                                                                                                                                                                                                                                                                                                                                                                                                                                                                                                                                                                                                                |                                                                                                                                                                                                                                                                                                                                                                                                                                                                                                                                  |                                                                                                                                                                                                                                                                                                                                                                                                                                                                                                                                                                                                                                                                                                                                                                                                                                                                                                                                                                                                                                                                                                                                                                                                                                                                                                                                                                                                                                                                                                                                                                                                                                                                                                                                                                                                                                                                                                                          |  |                   |   |            |                                      |                         |                |                                     |           |            |                                       |  |            |                         |                   |  |                              |  |                        |                |                         |  |  |                              |  |                         |            |                         |  |  |                              |  |                         |  |                    |   |            |           |                                      |                |          |  |            |         |  |
|                                                                                                                                                                                                                                                                                   | stable within 2 lines: 66.7%                                                                                                                                                                                                                                                                                                                                                                                                                                                                                                                                                                                                                                                                                                                                                                                                                                                                                                                                                                                                                                           |                                                                                                                                                                                                                                                                                                                                                                                                                                                                                                                                  |                                                                                                                                                                                                                                                                                                                                                                                                                                                                                                                                                                                                                                                                                                                                                                                                                                                                                                                                                                                                                                                                                                                                                                                                                                                                                                                                                                                                                                                                                                                                                                                                                                                                                                                                                                                                                                                                                                                          |  |                   |   |            |                                      |                         |                |                                     |           |            |                                       |  |            |                         |                   |  |                              |  |                        |                |                         |  |  |                              |  |                         |            |                         |  |  |                              |  |                         |  |                    |   |            |           |                                      |                |          |  |            |         |  |
|                                                                                                                                                                                                                                                                                   | -2 lines or more: 18.5%                                                                                                                                                                                                                                                                                                                                                                                                                                                                                                                                                                                                                                                                                                                                                                                                                                                                                                                                                                                                                                                |                                                                                                                                                                                                                                                                                                                                                                                                                                                                                                                                  |                                                                                                                                                                                                                                                                                                                                                                                                                                                                                                                                                                                                                                                                                                                                                                                                                                                                                                                                                                                                                                                                                                                                                                                                                                                                                                                                                                                                                                                                                                                                                                                                                                                                                                                                                                                                                                                                                                                          |  |                   |   |            |                                      |                         |                |                                     |           |            |                                       |  |            |                         |                   |  |                              |  |                        |                |                         |  |  |                              |  |                         |            |                         |  |  |                              |  |                         |  |                    |   |            |           |                                      |                |          |  |            |         |  |
|                                                                                                                                                                                                                                                                                   | CMT ( $\mu$ m), SD                                                                                                                                                                                                                                                                                                                                                                                                                                                                                                                                                                                                                                                                                                                                                                                                                                                                                                                                                                                                                                                     | p                                                                                                                                                                                                                                                                                                                                                                                                                                                                                                                                |                                                                                                                                                                                                                                                                                                                                                                                                                                                                                                                                                                                                                                                                                                                                                                                                                                                                                                                                                                                                                                                                                                                                                                                                                                                                                                                                                                                                                                                                                                                                                                                                                                                                                                                                                                                                                                                                                                                          |  |                   |   |            |                                      |                         |                |                                     |           |            |                                       |  |            |                         |                   |  |                              |  |                        |                |                         |  |  |                              |  |                         |            |                         |  |  |                              |  |                         |  |                    |   |            |           |                                      |                |          |  |            |         |  |
| <b>IVB</b>                                                                                                                                                                                                                                                                        | -56 SD140                                                                                                                                                                                                                                                                                                                                                                                                                                                                                                                                                                                                                                                                                                                                                                                                                                                                                                                                                                                                                                                              | 0.044 vs baseline, NS between groups                                                                                                                                                                                                                                                                                                                                                                                                                                                                                             |                                                                                                                                                                                                                                                                                                                                                                                                                                                                                                                                                                                                                                                                                                                                                                                                                                                                                                                                                                                                                                                                                                                                                                                                                                                                                                                                                                                                                                                                                                                                                                                                                                                                                                                                                                                                                                                                                                                          |  |                   |   |            |                                      |                         |                |                                     |           |            |                                       |  |            |                         |                   |  |                              |  |                        |                |                         |  |  |                              |  |                         |            |                         |  |  |                              |  |                         |  |                    |   |            |           |                                      |                |          |  |            |         |  |
| <b>IVB/IVT</b>                                                                                                                                                                                                                                                                    | -5 SD113                                                                                                                                                                                                                                                                                                                                                                                                                                                                                                                                                                                                                                                                                                                                                                                                                                                                                                                                                                                                                                                               |                                                                                                                                                                                                                                                                                                                                                                                                                                                                                                                                  |                                                                                                                                                                                                                                                                                                                                                                                                                                                                                                                                                                                                                                                                                                                                                                                                                                                                                                                                                                                                                                                                                                                                                                                                                                                                                                                                                                                                                                                                                                                                                                                                                                                                                                                                                                                                                                                                                                                          |  |                   |   |            |                                      |                         |                |                                     |           |            |                                       |  |            |                         |                   |  |                              |  |                        |                |                         |  |  |                              |  |                         |            |                         |  |  |                              |  |                         |  |                    |   |            |           |                                      |                |          |  |            |         |  |
| <b>MPC</b>                                                                                                                                                                                                                                                                        | -8 SD67                                                                                                                                                                                                                                                                                                                                                                                                                                                                                                                                                                                                                                                                                                                                                                                                                                                                                                                                                                                                                                                                |                                                                                                                                                                                                                                                                                                                                                                                                                                                                                                                                  |                                                                                                                                                                                                                                                                                                                                                                                                                                                                                                                                                                                                                                                                                                                                                                                                                                                                                                                                                                                                                                                                                                                                                                                                                                                                                                                                                                                                                                                                                                                                                                                                                                                                                                                                                                                                                                                                                                                          |  |                   |   |            |                                      |                         |                |                                     |           |            |                                       |  |            |                         |                   |  |                              |  |                        |                |                         |  |  |                              |  |                         |            |                         |  |  |                              |  |                         |  |                    |   |            |           |                                      |                |          |  |            |         |  |

**Abbreviations:** See table 2

**Table 9: Ranibizumab safety data**

|                              | READ-2 study[28,47]                         | RESOLVE study[36]                                    | RESTORE study[24]                               | RISE study[38]                         | RIDE study[38]                         |
|------------------------------|---------------------------------------------|------------------------------------------------------|-------------------------------------------------|----------------------------------------|----------------------------------------|
| Number of patients           | IVR: n=42; L: n=42; IVRL: n=42              | IVR0.3: n=51; IVR0.5: n=51; C: n=49                  | IVR: n=116; IVRL: n=118; L: n=111               | IVR0.3: 125; IVR0.5: 126; C: 123       | IVR0.3: 125; IVR0.5: 124; C: 127       |
| <b>Ocular adverse events</b> |                                             |                                                      |                                                 |                                        |                                        |
| Eye pain                     | NR                                          | IVR0.3: n=9 (18%); IVR0.5: n=9 (18%); C: n=10 (20%)  | IVR: n=13 (11%); IVRL: n=10 (8%); L: n=12 (11%) | IVR0.3: 26%; IVR0.5: 21%; C: 19%       | IVR0.3: 8%; IVR0.5: 12.9%; C: 7.1%     |
| Conjunctival hyperaemia      | NR                                          | NR                                                   | IVR: n=9 (8%); IVRL: n=6 (5%); L: n=6 (5%)      | NR                                     | NR                                     |
| Conjunctival haemorrhage     | NR                                          | IVR0.3: n=10 (20%); IVR0.5: n=13 (25%); C: n=7 (14%) | IVR: n=8 (7%); IVRL: n=10 (8%); L: n=0          | IVR0.3: 54%; IVR0.5: 52%; C: 32%       | IVR0.3: 40.8%; IVR0.5: 50.0%; C: 31.5% |
| IOP increase                 | NR                                          | IVR0.3: n=6 (12%); IVR0.5: n=15 (29%); C: n=1 (2%)   | IVR: n=1 (<1%); IVRL: n=1 (<1%);                | IVR0.3: 20%; IVR0.5: 14%; C: 2%        | IVR0.3: 15.2%; IVR0.5: 18.5%; C: 11%   |
| Vitreous haemorrhage         | IVR: n=1 (2%); L: n=4 (10%); IVRL: n=3 (7%) | IVR0.3: n=1 (2%); IVR0.5: n=0; C: n=0                | NR                                              | IVR0.3: 3.2%; IVR0.5: 3.2%; C: 13%     | IVR0.3: 0.8%; IVR0.5: 2.4%; C: 15%     |
| Substantial worsening of DMO | L: n=1 (2%)                                 |                                                      | NR                                              | NR                                     | NR                                     |
| Retinal ischaemia            | NR                                          | IVR0.3: n=0; IVR0.5: n=1 (2%); C: n=0                | NR                                              | NR                                     | NR                                     |
| Retinal artery occlusion     | NR                                          | IVR0.3: n=0; IVR0.5: n=1 (2%); C: n=0                | NR                                              | NR                                     | NR                                     |
| Endophthalmitis              | NR                                          | IVR0.3: n=1 (2%); IVR0.5: n=1 (2%); C: n=0           | NR                                              | IVR0.3: 0.8%; IVR0.5: 0; C: 0          | IVR0.3 + IVR0.5: 1.2%; C: 0%           |
| Retinal detachment           | NR                                          | IVR0.3: n=0; IVR0.5: n=0; C: n=1 (2%)                | NR                                              | IVR0.3: 0.8%; IVR0.5: 0; C: 0.8%       | IVR0.3 + IVR0.5: 0.4%; C: 0%           |
| Neovascularisation           | NR                                          | NR                                                   | NR                                              | IVR0.3: 0; IVR0.5: 0; C: 0.8%          | IVR0.3: 0.8%; IVR0.5: 0.8%; C: 5.5%    |
| Traumatic cataract           | NR                                          | NR                                                   | NR                                              | IVR0.3: 0.8%; IVR0.5: 0.8%; C: 0       | IVR0.3 + IVR0.5: 0.4%; C: 0%           |
| Uveitis                      | NR                                          | NR                                                   | NR                                              | NR                                     | IVR0.3 + IVR0.5: 0.4%; C: 0%           |
| Macular oedema               | NR                                          | NR                                                   | NR                                              | IVR0.3: 16.8%; IVR0.5: 20.6%; C: 21.1% | IVR0.3: 19.2%; IVR0.5: 13.7%; C: 20.5% |
| Retinal exudates             | NR                                          | NR                                                   | NR                                              | IVR0.3: 19.2%; IVR0.5: 17.5%; C: 20.3% | IVR0.3: 16.0%; IVR0.5: 15.3%; C: 11.0% |
| Retinal haemorrhage          | NR                                          | NR                                                   | NR                                              | IVR0.3: 12.8%; IVR0.5: 12.7%; C: 20.3% | IVR0.3: 15.2%; IVR0.5: 22.6%; C: 18.9% |

|                                  |                                                              |                                                   |                                              |                                                                              |                                                                                                                               |
|----------------------------------|--------------------------------------------------------------|---------------------------------------------------|----------------------------------------------|------------------------------------------------------------------------------|-------------------------------------------------------------------------------------------------------------------------------|
| Cataract                         | NR                                                           | NR                                                | NR                                           | IVR0.3: 16.8%; IVR0.5: 11.9%; C: 14.6%                                       | IVR0.3: 20.0%; IVR0.5: 23.4%; C: 23.6%                                                                                        |
| Vitreous detachment              | NR                                                           | NR                                                | NR                                           | IVR0.3: 13.6%; IVR0.5: 11.1%; C: 15.4%                                       | IVR0.3: 8.8%; IVR0.5: 12.9%; C: 15.0%                                                                                         |
| Ocular hyperemia                 | NR                                                           | NR                                                | NR                                           | IVR0.3: 15.2%; IVR0.5: 11.1%; C: 10.6%                                       | IVR0.3: 3.2%; IVR0.5: 3.2%; C: 7.9%                                                                                           |
| Vitreous floaters                | NR                                                           | NR                                                | NR                                           | IVR0.3: 12.8%; IVR0.5: 14.3%; C: 5.7%                                        | IVR0.3: 7.2%; IVR0.5: 8.1%; C: 3.1%                                                                                           |
| Eye irritation                   | NR                                                           | NR                                                | NR                                           | IVR0.3: 10.4%; IVR0.5: 9.5%; C: 6.5%                                         | IVR0.3: 5.6%; IVR0.5: 5.6%; C: 3.1%                                                                                           |
| Foreign body sensation in eyes   | NR                                                           | NR                                                | NR                                           | IVR0.3: 12.8%; IVR0.5: 7.1%; C: 4.1%                                         | IVR0.3: 8.0%; IVR0.5: 2.4%; C: 5.5%                                                                                           |
| <b>Systematic adverse events</b> |                                                              |                                                   |                                              |                                                                              |                                                                                                                               |
| Arterial thromboembolic events   | Stroke in 1 pt (2%) in IVRL group- not related to study drug | IVR0.3: n=0; IVR0.5: n=3 (6%); C: n=2 (4%)        | IVR: n=6 (5%); IVRL: n=1 (<1%); L: n=1 (<1%) | IVR0.3: 3.2% (n=1 stroke); IVR0.5: 7.9% (n=5 strokes); C: 7.3% (n=2 strokes) | IVR0.3: 1.6% (stroke), 5.6% (heart attack); IVR0.5: 2.4% (stroke), 2.4% (heart attack); C: 1.6% (stroke), 5.6% (heart attack) |
| Hypertension                     | NR                                                           | IVR0.3: n=4 (8%); IVR0.5: n=5 (10%); C: n=5 (10%) | IVR: n=9 (8%); IVRL: n=6 (5%); L: n=9 (8%)   | Serious IVR0.3: 0.8%; IVR0.5: 3.2%; C: 0.8%                                  | Serious IVR0.3: 1.6%; IVR0.5: 1.6%; C: 0%                                                                                     |
| Non-ocular haemorrhage           | NR                                                           | IVR0.3: n=1 (2%); IVR0.5: n=1 (2%); C: n=0        | IVR: n=1 (<1%); IVRL: n=0; L: n=1 (<1%)      | NR                                                                           | NR                                                                                                                            |
| Proteinuria                      | NR                                                           | NR                                                | IVR: n=1 (<1%); IVRL: n=1 (<1%); L: n=0      | NR                                                                           | NR                                                                                                                            |
| Deaths                           | 1 (2%) due to CVA in IVRL group                              | NR                                                | IVR: n=2 (2%); IVRL: n=2 (2%); L: n=2 (2%)   | IVR0.3: 2.4%; IVR0.5: 4.0%; C: 0.8%                                          | IVR0.3: 3.2%; IVR0.5: 4.8%; C: 1.6%                                                                                           |

NR – not reported, IVR – intra-vitreal ranibizumab, IVRL – intra-vitreal ranibizumab plus laser, C – control, L – laser, IOP –intra-ocular pressure, DMO – diabetic macular oedema,



Table 10: Bevacizumab safety

|                                                        | <b>BOLT study[23,52]</b>                                       | <b>Lam 2009[35]</b>                                                                                                                                                   | <b>Faghihi 2010[53]</b>                                                                                                                                                    |
|--------------------------------------------------------|----------------------------------------------------------------|-----------------------------------------------------------------------------------------------------------------------------------------------------------------------|----------------------------------------------------------------------------------------------------------------------------------------------------------------------------|
| Number of patients                                     | MLT: n=38; IVB: n=42                                           | IVB1.25, n=26; IVB2.5, n=26                                                                                                                                           | IVB 1.25 n= 40 IVB 1.25 plus MLT n=40                                                                                                                                      |
| <b>Ocular adverse events</b>                           |                                                                |                                                                                                                                                                       | <b>Not reported</b>                                                                                                                                                        |
| Loss of _15 or _30 ETDRS letters                       | MLT: n=1 transient, 3 at 24 month analysis; IVB: n=4 transient | No significant ocular events (IOP increase, retinal tear, retinal detachment, endophthalmitis); no significant difference in change in cataract scores between groups |                                                                                                                                                                            |
| Vitreous haemorrhage                                   | MLT: n=1; IVB: n=0                                             |                                                                                                                                                                       |                                                                                                                                                                            |
| Eye pain/irritation/watering during or after injection | MLT:n= 0; IVB: n=8                                             |                                                                                                                                                                       |                                                                                                                                                                            |
| Red eye after injection                                | MLT: n=0; IVB: n=8                                             |                                                                                                                                                                       |                                                                                                                                                                            |
| Endophthalmitis                                        | NR                                                             |                                                                                                                                                                       |                                                                                                                                                                            |
| Transient IOP increase                                 | ≥30 mm Hg - MLT: 0; IVB: n=4 ≥ 45 mm Hg - MLT: n=1; IVB: n=1   |                                                                                                                                                                       |                                                                                                                                                                            |
| Floaters after injection                               | MLT: n= 0; IVB: n=2                                            |                                                                                                                                                                       |                                                                                                                                                                            |
| Corneal epithelial defect                              | MLT:n=0; IVB:n=1                                               |                                                                                                                                                                       |                                                                                                                                                                            |
| Vitreomacular traction with macular oedema             | MLT: n=1; IVB: n=0                                             |                                                                                                                                                                       |                                                                                                                                                                            |
| <b>Systematic adverse events</b>                       |                                                                |                                                                                                                                                                       | no systematic adverse effects (1 patient in 1.25 mg group with foot gangrene requiring amputation due to worsening diabetic neuropathy, considered unrelated to treatment) |
| Anaemia                                                | MLT: n=1; IVB: n=0                                             |                                                                                                                                                                       |                                                                                                                                                                            |
| Vomiting after FFA                                     | MLT: n=1; IVB: n=0                                             |                                                                                                                                                                       |                                                                                                                                                                            |
| Uncontrolled hypertension                              | MLT:n=0; IVB: n=1                                              |                                                                                                                                                                       |                                                                                                                                                                            |
| Polymyalgia rheumatica                                 | MLT:n=0; IVB: n=1                                              |                                                                                                                                                                       |                                                                                                                                                                            |
| Intermittent claudication                              | MLT:n=0; IVB: n=1                                              |                                                                                                                                                                       |                                                                                                                                                                            |
| Gastroenteritis                                        | MLT:n=0; IVB: n=1                                              |                                                                                                                                                                       |                                                                                                                                                                            |
| Fall                                                   | MLT:n=2; IVB: n=0                                              |                                                                                                                                                                       |                                                                                                                                                                            |
| Urinary tract infection                                | MLT:n=0; IVB: n=1                                              |                                                                                                                                                                       |                                                                                                                                                                            |
| Chest infection                                        | MLT:n=0; IVB: n=1                                              |                                                                                                                                                                       |                                                                                                                                                                            |
| Headaches, dizziness, tiredness                        | MLT:n=1; IVB: n=0                                              |                                                                                                                                                                       |                                                                                                                                                                            |
| Bell palsy                                             | MLT:n=1; IVB: n=0                                              |                                                                                                                                                                       |                                                                                                                                                                            |
| Admission for diabetic foot ulcer                      | MLT:n=1; IVB: n=1                                              |                                                                                                                                                                       |                                                                                                                                                                            |
| Admission for cholecystectomy                          | MLT:n=0; IVB: n=1                                              |                                                                                                                                                                       |                                                                                                                                                                            |
| Admission for fall/loss of consciousness               | MLT:n=1; IVB: n=0                                              |                                                                                                                                                                       |                                                                                                                                                                            |
| Angina-hospital admission                              | MLT:n=1; IVB: n=0                                              |                                                                                                                                                                       |                                                                                                                                                                            |
| Cerebrovascular accident                               | MLT:n=1; IVB: n=0                                              |                                                                                                                                                                       |                                                                                                                                                                            |
| Myocardial infarction                                  | MLT:n=0; IVB: n=2                                              |                                                                                                                                                                       |                                                                                                                                                                            |
| Coronary artery bypass graft                           | MLT:n=0; IVB: n=1                                              |                                                                                                                                                                       |                                                                                                                                                                            |
| Dyspnea, chest pain-admitted for hospital observation  | MLT:n=0; IVB: n=1                                              |                                                                                                                                                                       |                                                                                                                                                                            |

1  
2  
3  
4  
5  
6  
7  
8  
9  
10  
11  
12  
13  
14  
15  
16  
17  
18  
19  
20  
21  
22  
23  
24  
25  
26  
27  
28  
29  
30  
31  
32  
33  
34  
35  
36  
37  
38  
39  
40  
41  
42  
43  
44  
45  
46  
47  
48  
49

|       |    |  |  |
|-------|----|--|--|
| DEATH | NR |  |  |
|-------|----|--|--|

For peer review only

**Table 11: Pegaptanib safety**

|                                  | <b>Cunningham 2005/Adamis 2006[39,57]</b>           | <b>Sultan 2011[40]</b>         |
|----------------------------------|-----------------------------------------------------|--------------------------------|
| Number of patients               | IVP0.3, n=44 eyes; IVP1, n=44 eyes; IVP3, n=42 eyes | IVP, n=133 eyes; C, n=127 eyes |
| <b>Ocular adverse events</b>     |                                                     |                                |
| Eye pain                         | Pegaptanib: 31%; C: 17%                             | IVP: 11.1%; C: 7.0%            |
| Vitreous haemorrhage             | Pegaptanib: 22%; C: 7%                              | IVP: 6.3%; C: 7.7%             |
| Punctuate keratitis              | Pegaptanib: 18%; C: 17%                             | IVP: 11.8%; C: 6.3%            |
| Cataract                         | Pegaptanib: 13%; C: 10%                             | IVP: 8.3%; C: 9.2%             |
| Eye discharge                    | Pegaptanib: 11%; C: 10%                             | NR                             |
| Conjunctival haemorrhage         | Pegaptanib: 10%; C: 0%                              | IVP: 22.2%; C: 14.1%           |
| Vitreous opacities               | Pegaptanib: 9%; C: 5%                               | NR                             |
| Blurred vision                   | Pegaptanib: 7%; C: 5%                               | NR                             |
| Other vitreous disorder          | Pegaptanib: 7%; C: 0%                               | NR                             |
| Other visual disturbance         | Pegaptanib: 7%; C: 0%                               | NR                             |
| Culture-negative endophthalmitis | Pegaptanib: n=1                                     | NR                             |
| IOP increase                     | NR                                                  | IVP: 17.4%; C: 6.3%            |
| Retinal haemorrhage              | NR                                                  | IVP: 6.3%; C: 10.6%            |
| Retinal exudates                 | NR                                                  | IVP: 6.3%; C: 5.6%             |
| Conjunctivitis                   | NR                                                  | IVP: 5.6%; C: 4.2%             |
| Lacrimation increased            | NR                                                  | IVP: 5.6%; C: 2.8%             |
| Diabetic retinal oedema          | NR                                                  | IVP: 11.1%; C: 17.6%           |
| Macular oedema                   | NR                                                  | IVP: 9.7%; C: 11.6%            |
| <b>Systemic adverse events</b>   |                                                     |                                |
| Non-ocular hypertension          | NR                                                  | IVP: 13.9%; C: 9.9%            |
| Cardiac disorders                | NR                                                  | IVP: 6.9%; C: 5.6%             |
| <b>DEATHS</b>                    | NR                                                  | IVP: n=4                       |

Table 12: aflibercept safety

|                              | DA VINCI 2010[30,58]                                                            |
|------------------------------|---------------------------------------------------------------------------------|
| Number of patients           | IVVTE (all doses) n=175, laser n = 44                                           |
| <b>Ocular adverse events</b> |                                                                                 |
| Conjunctival hemorrhage      | At 6 months: Laser 18.2%, IVVTE 18.9%<br>At 12 months: Laser 18.2%, IVVTE 26.9% |
| IOP increase                 | At 6 months: Laser 2.3%, IVVTE 9.7%<br>At 12 months: Laser 2.3%, IVVTE 9.7%     |
| Eye pain                     | At 6 months: Laser 4.5%, IVVTE 8.6%<br>At 12 months: Laser 4.5%, IVVTE 13.7%    |
| Ocular hyperaemia            | At 6 months: Laser 4.5%, IVVTE 6.3%<br>At 12 months: Laser 4.5%, IVVTE 7.4%     |
| Vitreous floaters            | At 6 months: Laser 4.5%, IVVTE 5.1%<br>At 12 months: Laser 4.5%, IVVTE 6.9%     |
| Endophthalmitis              | At 6 months: Laser 0%, IVVTE 1.1%<br>At 12 months: Laser 0%, IVVTE 1.1%         |
| Uveitis                      | At 6 months: Laser 0%, IVVTE 0.6%<br>At 12 months: Laser 0%, IVVTE 0.6%         |
| Diabetic retinal oedema      | At 6 months: Laser 2.3%, IVVTE 0%<br>At 12 months: Laser 2.3%, IVVTE 4.6%       |
| Visual acuity reduced        | At 6 months: Laser 2.3%, IVVTE 0%<br>At 12 months: Laser 2.3%, IVVTE 0%         |
| Vitreous hemorrhage          | At 6 months: Laser 2.3%, IVVTE 0%<br>At 12 months: Laser 6.8%, IVVTE 0%         |
| Corneal abrasion             | At 6 months: Laser 0%, IVVTE 0.6%<br>At 12 months: Laser 0%, IVVTE 4.6%         |
| Retinal tear                 | At 6 months: Laser 0%, IVVTE 0.6%<br>At 12 months: NR                           |
| <b>Systematic events</b>     |                                                                                 |
| Hypertension                 | At 6 months: Laser 6.8%, IVVTE 9.7%<br>At 12 months: Laser 0%, IVVTE 1.7%       |
| Myocardial infarction        | At 6 months: Laser 0%, IVVTE 1.1%<br>At 12 months: Laser 0%, IVVTE 1.7%         |
| Cerebrovascular event        | At 6 months: Laser 0%, IVVTE 1.1%<br>At 12 months: Laser 2.3%, IVVTE 1.7%       |
| Death                        | At 6 months: Laser 0%, IVVTE 1.7%<br>At 12 months: Laser 2.3%, IVVTE 4.0%       |

**Table 13: Dexamethasone safety**

|                              | Callanan 2011[44]                                          | Haller 2010[59]                                                                                                                                              |
|------------------------------|------------------------------------------------------------|--------------------------------------------------------------------------------------------------------------------------------------------------------------|
| Number of patients           |                                                            |                                                                                                                                                              |
| <b>Ocular adverse events</b> |                                                            |                                                                                                                                                              |
| IOP elevation                | DIL: 20% (p<0.001); 1% ≥10 mm Hg<br>L: 1.6% ; 0% ≥10 mm Hg |                                                                                                                                                              |
| Cataract                     | NR                                                         | NR                                                                                                                                                           |
| Anterior chamber cells       | NR                                                         | DDS350: 29.1%; DDS700: 26.4%; C: 1.8%                                                                                                                        |
| Anterior chamber flare       | NR                                                         | DDS350: 27.3%; DDS700: 20.8%; C: 8.8%                                                                                                                        |
| Vitreous haemorrhage         | NR                                                         | DDS350: 20.0%; DDS700: 22.6%; C: 5.3%                                                                                                                        |
| Eye pain                     | NR                                                         | DDS350: 18.2%; DDS700: 9.4%; C: 3.5%                                                                                                                         |
| Vitreous disorder            | NR                                                         | DDS350: 20.0%; DDS700: 15.1%; C: 3.5%                                                                                                                        |
| Increased IOP                | NR                                                         | DDS350: 14.5%; DDS700: 9.4%; C: 0%                                                                                                                           |
| Conjunctival haemorrhage     | NR                                                         | DDS350: 14.5%; DDS700: 7.5%; C: 0%                                                                                                                           |
| Vitreous floaters            | NR                                                         | DDS350: 7.3%; DDS700: 17.0%; C: 0%                                                                                                                           |
|                              |                                                            | No significant differences in: reduced VA, eye irritation, abnormal sensation in eye, macular oedema, eye pruritus, retinal hemorrhage, DR, nonocular events |

Table 14: Fluocinolone safety

|                                            | FAME study (Campochiaro 2011/2012)[29,60]                                                                                                                                                                                                                           | Pearson 2011[43]        |
|--------------------------------------------|---------------------------------------------------------------------------------------------------------------------------------------------------------------------------------------------------------------------------------------------------------------------|-------------------------|
| Number of patients                         |                                                                                                                                                                                                                                                                     |                         |
| <b>Ocular adverse events</b>               |                                                                                                                                                                                                                                                                     |                         |
| IOP at 12 months                           | NR                                                                                                                                                                                                                                                                  | NR                      |
| Progression of cataract                    | NR                                                                                                                                                                                                                                                                  | NR                      |
| Cataract                                   | NR                                                                                                                                                                                                                                                                  | SRFA: 55.9%; SOC: 21.7% |
| Transient vitreous floaters                | NR                                                                                                                                                                                                                                                                  | NR                      |
| Transient subconjunctival haemorrhage      | NR                                                                                                                                                                                                                                                                  | NR                      |
| Cataract surgery                           | SRFA0.2: 41.1% (74.9% of those without cataract surgery at baseline, 80.0% at 36 months); SRFA0.5: 50.9% (84.5% of those without cataract surgery at baseline, 87.2% at 36 months); C: 7% (23.1% of those without cataract surgery at baseline, 27.3% at 36 months) | NR                      |
| Glaucoma                                   | SRFA0.2: 1.6%; SRFA0.5: 2.3%; C: 0.5%                                                                                                                                                                                                                               | NR                      |
| Increased IOP                              | SRFA0.2: 3.2%; SRFA0.5: 3.3%; C: 0%                                                                                                                                                                                                                                 | SRFA: 69.3%; SOC: 11.6% |
| IOP >30 mmHg at any point during 36 months | SRFA0.2: 18.4%; SRFA0.5: 22.9%; C: 4.3%                                                                                                                                                                                                                             | NR                      |
| Trabeculectomy                             | SRFA0.2: 2.1%; SRFA0.5: 4.8%; C: 0%                                                                                                                                                                                                                                 | NR                      |
| Other glaucoma surgery                     | SRFA0.2: 1.3%; SRFA0.5: 1.3%; C: 0.5%                                                                                                                                                                                                                               | NR                      |
| Trabeculectomy                             | SRFA0.2: 0.8%; SRFA0.5: 2.3%; C: 0%                                                                                                                                                                                                                                 | NR                      |
| Vitreous haemorrhage                       | NR                                                                                                                                                                                                                                                                  | SRFA: 40.2%; SOC: 18.8% |
| Abnormal sensation in eye                  | NR                                                                                                                                                                                                                                                                  | SRFA: 37%; SOC: 11.6%   |
| Macular oedema                             | NR                                                                                                                                                                                                                                                                  | SRFA: 34.6%             |
| Eye pain                                   | NR                                                                                                                                                                                                                                                                  | SRFA: 26.8%; SOC: 15.9% |
| Eye irritation                             | NR                                                                                                                                                                                                                                                                  | SRFA: 22%; SOC: 10.1%   |
| Increased lacrimation                      | NR                                                                                                                                                                                                                                                                  | SRFA: 22%; SOC: 8.7%    |
| Photophobia                                | NR                                                                                                                                                                                                                                                                  | SRFA: 21.3%; SOC: 21.7% |
| Blurred vision                             | NR                                                                                                                                                                                                                                                                  | SRFA: 21.3%; SOC: 15.9% |
| Vitreous floaters                          | NR                                                                                                                                                                                                                                                                  | SRFA: 21.3%; SOC: 8.7%  |
| <b>Systemic adverse events</b>             |                                                                                                                                                                                                                                                                     |                         |
| Serious cardiovascular events              | SRFA0.2: 12.0%; SRFA0.5: 13.2%; C: 10.3%                                                                                                                                                                                                                            |                         |
| Pruritus                                   | NR                                                                                                                                                                                                                                                                  | SRFA: 38.6%; SOC: 21.7% |
| DEATHS                                     | NR                                                                                                                                                                                                                                                                  | NR                      |

Table 15: Triamcinolone safety

|                                    | DRCR Network 2008 (Ip 2008a / Ip 2008b / Beck 2009 / Bressler 2009) [22,61,63,64]                                                                                                                  | Gillies 2006 / 2007 / 2009 / Sutter 2004[32,136-138]                                       | Gillies 2011[33]            | Kim 2010[45] | Lam 2007[34]                                               | Ockrim 2008 / Sivaprasad 2008[42,62]                                                                   |
|------------------------------------|----------------------------------------------------------------------------------------------------------------------------------------------------------------------------------------------------|--------------------------------------------------------------------------------------------|-----------------------------|--------------|------------------------------------------------------------|--------------------------------------------------------------------------------------------------------|
| Number of patients                 |                                                                                                                                                                                                    |                                                                                            |                             |              |                                                            |                                                                                                        |
| <b>Ocular adverse events</b>       |                                                                                                                                                                                                    |                                                                                            |                             |              |                                                            |                                                                                                        |
|                                    | At 2 years (or 3 years when indicated)                                                                                                                                                             | At 2 years                                                                                 | -                           | Not reported | -                                                          | At 12 months                                                                                           |
| IOP $\geq$ 30 mm Hg                | IVT1: n=22; IVT4: n=53; L: n=3                                                                                                                                                                     | NR                                                                                         | NR                          |              | NR                                                         | IVT: IOP significantly higher than in L group (18.2 mm Hg, range 12 to 26 mm Hg); no cases of glaucoma |
| IOP >22 mm Hg                      | NR                                                                                                                                                                                                 | NR                                                                                         | NR                          |              | IVT: 37% (p=0.002 vs. L); IVTL: 36% (p=0.002 vs. L); L: 5% | NR                                                                                                     |
| IOP $\geq$ 10 mm Hg from baseline  | IVT1: n=41; IVT4: n=85; L: n=12                                                                                                                                                                    | NR                                                                                         | NR                          |              | NR                                                         | NR                                                                                                     |
| IOP $\geq$ 5 mm Hg                 | NR                                                                                                                                                                                                 | IVT: 68% (p=0.007 vs. C); C: 10%                                                           | NR                          |              | NR                                                         | NR                                                                                                     |
| IOP lowering medication used       | IVT1: n=31; IVT4: n=76; L: n=25                                                                                                                                                                    | IVT: 44% (p=0.0002 vs. C); C: 3%                                                           | IVTL: 64% (P<0.001); L: 24% |              | NR                                                         | NR                                                                                                     |
| Cataract surgery                   | IVT1: 23% (of those phakic at baseline, 46% by 3 years (p<0.001 between all groups); IVT4: 51% (of those phakic at baseline, 83% by 3 years); L: 13% (of those phakic at baseline, 31% by 3 years) | IVT: 56% (of phakic eyes over 3 years, p<0.001 vs. C); C: 8% (of phakic eyes over 3 years) |                             |              | NR                                                         | NR                                                                                                     |
| Ptosis                             | NR                                                                                                                                                                                                 | NR                                                                                         | NR                          |              | NR                                                         | NR                                                                                                     |
| Retinal detachment                 | IVT1: n=2; IVT4: n=4; L: n=2                                                                                                                                                                       | NR                                                                                         | NR                          |              | None                                                       | NR                                                                                                     |
| Retinal vein occlusion             | IVT1: n=1; IVT4: n=2; L: n=3                                                                                                                                                                       | NR                                                                                         | NR                          |              | NR                                                         | NR                                                                                                     |
| Retinal artery occlusion           | IVT1: n=0; IVT4: n=0; L: n=1                                                                                                                                                                       | NR                                                                                         | NR                          |              | NR                                                         | NR                                                                                                     |
| Anterior ischemic optic neuropathy | IVT1: n=1; IVT4: n=0; L: n=0                                                                                                                                                                       | NR                                                                                         | NR                          |              | NR                                                         | NR                                                                                                     |
| Vitrectomy                         | IVT1: n=26; IVT4: n=19; L: n=31                                                                                                                                                                    | NR                                                                                         | NR                          |              | NR                                                         | NR                                                                                                     |
| Open angle glaucoma                | IVT1: n=2; IVT4: n=7; L: n=2                                                                                                                                                                       | NR                                                                                         | NR                          |              | NR                                                         | NR                                                                                                     |



1  
2  
3  
4  
5  
6  
7  
8  
9  
10  
11  
12  
13  
14  
15  
16  
17  
18  
19  
20  
21  
22  
23  
24  
25  
26  
27  
28  
29  
30  
31  
32  
33  
34  
35  
36  
37  
38  
39  
40  
41  
42  
43  
44  
45  
46  
47  
48  
49

|                                 |                                    |                              |                                                                                   |                                                                            |                                                                                 |
|---------------------------------|------------------------------------|------------------------------|-----------------------------------------------------------------------------------|----------------------------------------------------------------------------|---------------------------------------------------------------------------------|
| Glaucoma filtering surgery      | IVT1: n=0; IVT4: n=2; L: n=0       | NR                           | NR                                                                                | NR                                                                         | NR                                                                              |
| Laser trabeculoplasty           | IVT1: n=0; IVT4: n=1; L: n=0       | IVT: n=2; C: n=0             | IVTL: n=1                                                                         | NR                                                                         | NR                                                                              |
| Ciliary body destruction        | IVT1: n=0; IVT4: n=1; L: n=0       | NR                           | NR                                                                                | NR                                                                         | NR                                                                              |
| Endophthalmitis                 | IVT1: n=0; IVT4: n=0; L: n=0       | (Infectious) IVT: n=1; C: NR | (Culture-negative) IVTL: n=1                                                      | None                                                                       | (sterile) IVT: n=1                                                              |
| pseudoendophthalmitis           | IVT1: n=0; IVT4: n=0; L: n=0       | NR                           | NR                                                                                | NR                                                                         | NR                                                                              |
| Chemosis                        | NR                                 | NR                           | NR                                                                                | NR                                                                         | NR                                                                              |
| % increase in cataract scores   | NR                                 | NR                           | NR                                                                                | IVT: +1.0 SD1.1 (p=NS vs. L); IVTL: +1.3 SD1.9 (p=NS vs. L); L: +0.5 SD0.9 | NR                                                                              |
| Ocular hypertension (>21 mm Hg) | NR                                 | NR                           | NR                                                                                | NR                                                                         | NR                                                                              |
| Cataract progression            | NR                                 | NR                           | Phakic eyes, progression by ≥2 AREDS grade, IVTL: 64% (p<0.001); L: 11% (p<0.001) | NR                                                                         | NR                                                                              |
| Corneal decompensation          | NR                                 | IVT: NR; C: n=1              | NR                                                                                | NR                                                                         | NR                                                                              |
| Cataract surgery                | NR                                 | NR                           | IVTL: 61% (p<0.001); L: 0%                                                        | NR                                                                         | IVT: n=2; L: n=1                                                                |
| Vitreous haemorrhage            | NR                                 | NR                           | NR                                                                                | IVTL: n=1                                                                  |                                                                                 |
| Lens opacity                    | NR                                 | NR                           | NR                                                                                | NR                                                                         | Significantly greater change in lens opacity in IVT group than in L group (1.9) |
| <b>DEATHS</b>                   | N=33, unrelated to study treatment | IVT: n=1; C: n=2             | IVTL: n=2; L: n=1                                                                 | NR                                                                         | NR                                                                              |

Table 16: Safety data in trials assessing more than one drug

|                                                   | Ahmadieh 2008[31]                                                                                                                  | ATEMD 2011 (Oliveira Neto 2011) [56] | DRCR Network 2010 (Elman 2010, Elman 2011)[21,46]   | Lim 2012[55]                | Soheilian 2007 / Soheilian 2009[37,41]                                                      |
|---------------------------------------------------|------------------------------------------------------------------------------------------------------------------------------------|--------------------------------------|-----------------------------------------------------|-----------------------------|---------------------------------------------------------------------------------------------|
| Number of patients                                |                                                                                                                                    |                                      |                                                     |                             |                                                                                             |
|                                                   | <b>Ocular adverse events</b>                                                                                                       |                                      |                                                     |                             |                                                                                             |
| Mild anterior chamber reaction                    | IVB: 19.5% (n=8 eyes), resolved after one week of no treatment; IVB/IVT: 18.9% (n=7 eyes), resolved after one week of no treatment | NR                                   | NR                                                  | NR                          | IVB: 20% (n=10 eyes), resolved after 1 week; IVB/IVT: 18% (n=9 eyes), resolved after 1 week |
| Marked anterior chamber reaction                  | IVB: n=1 (topical corticosteroid and cycloplegic drops)                                                                            | NR                                   | NR                                                  | NR                          | IVB: n=1 (topical corticosteroids and cycloplegic drops);                                   |
| Progression of fibrous proliferation              | IVB: n=1 with no sign of retinal traction                                                                                          | NR                                   | NR                                                  | NR                          | IVB: n=1 with no sign of retinal traction;                                                  |
| Vitreous haemorrhage                              | IVB/IVT: n=1 after third injection (excluded from study)                                                                           | NR                                   | NR                                                  | NR                          | NR                                                                                          |
| IOP rise                                          | IVB: 23, 22 and 28 mm Hg at 6, 12 and 18 weeks (anti-glaucoma drops)                                                               | NR                                   | IOP elevation more frequent with triamcinolone + PL | IVB/IVT: 8.3%<br>IVT: 10.8% | NR                                                                                          |
| IOP $\geq$ 10 mm Hg from baseline                 | NR                                                                                                                                 | NR                                   | CPL: n=16; RPL: n=10; RDL: n=5; TPL: n=70           | NR                          | NR                                                                                          |
| IOP $\geq$ 30 mm Hg from baseline                 | NR                                                                                                                                 | NR                                   | CPL: n=3; RPL: n=2; RDL: n=4; TPL: n=46             | NR                          | NR                                                                                          |
| Initiation of IOP lowering treatment at any visit | NR                                                                                                                                 | NR                                   | CPL: n=9; RPL: n=5; RDL: n=4; TPL: n=41             | NR                          | NR                                                                                          |
| Iris neovascularization                           | None                                                                                                                               | NR                                   | NR                                                  | NR                          | NR                                                                                          |
| Lens opacity                                      | None                                                                                                                               | NR                                   | NR                                                  | NR                          | Severe lens opacity<br>IVB/IVT: n=4 eyes; MPC: n=1 eye                                      |
| Endophthalmitis                                   | NR                                                                                                                                 | NR                                   | CPL: n=1; RPL: n=1; RDL: n=1; TPL: n=0              | NR                          | None                                                                                        |
| Pseudoendophthalmitis                             | NR                                                                                                                                 | NR                                   | CPL: n=1; RPL: n=0; RDL: n=0; TPL: n=1              | NR                          | NR                                                                                          |
| Ocular vascular event                             | NR                                                                                                                                 | NR                                   | CPL: n=1; RPL: n=1; RDL: n=0; TPL: n=2              | NR                          | NR                                                                                          |

|                                        |        |                                                     |                                                                                                                                                                  |    |                                                                                                          |
|----------------------------------------|--------|-----------------------------------------------------|------------------------------------------------------------------------------------------------------------------------------------------------------------------|----|----------------------------------------------------------------------------------------------------------|
| Retinal detachment                     | NR     | NR                                                  | CPL: n=0; RPL: n=0; RDL: n=1; TPL: n=0                                                                                                                           | NR | None                                                                                                     |
| Vitrectomy                             | NR     | NR                                                  | CPL: n=7; RPL: n=0; RDL: n=3; TPL: n=0                                                                                                                           | NR | NR                                                                                                       |
| Vitreous haemorrhage                   | NR     | NR                                                  | CPL: n=15; RPL: n=3; RDL: n=4; TPL: n=2                                                                                                                          | NR | None                                                                                                     |
| Cataract surgery                       | NR     | NR                                                  | CPL: n=11 (of those phakic at baseline); RPL: n=6 (of those phakic at baseline); RDL: n=8 (of those phakic at baseline); TPL: n=19 (of those phakic at baseline) | NR | NR                                                                                                       |
| Glaucoma surgery                       | NR     | NR                                                  | NR                                                                                                                                                               | NR | NR                                                                                                       |
| Retinal neovascularization             | NR     | NR                                                  | NR                                                                                                                                                               | NR | IVB: n=4 (all resolved); MPC: n=3 eyes (2 resolved)                                                      |
| Development of early PDR               | NR     | NR                                                  | NR                                                                                                                                                               | NR | IVB: n=1; IVB/IVT: n=4; MPC: n=3                                                                         |
| Progression to high-risk PDR           | NR     | NR                                                  | NR                                                                                                                                                               | NR | IVB: n=4; IVB/IVT: n=3; MP: n=3                                                                          |
| Ocular hypertension ( $\geq 23$ mm HG) | NR     | NR                                                  | NR                                                                                                                                                               | NR | IVB/IVT: 16% (n=8 of eyes), controlled medically in all except 1 that progressed to neovascular glaucoma |
| <b>Systemic adverse events</b>         |        |                                                     |                                                                                                                                                                  |    |                                                                                                          |
| Acute myocardial infarction            |        | N=1, considered not to be related to the study drug | No specific systemic adverse events that could be attributed to chance                                                                                           |    | No significant blood pressure increase, no thromboembolic events                                         |
| Deaths                                 | C: n=1 | N=1, considered not to be related to the study drug | CPL: n=8; RPL: n=5; RDL: n=3; TPL: n=2                                                                                                                           |    | IVB/IVT: n=2; MPC: n=2                                                                                   |

NR – not reported, IVB – intra-vitreous bevacizumab, IVT- intravitreal triamcinolone, IVR – intra-vitreous ranibizumab, IVRL – intra-vitreous ranibizumab plus laser, C – control, L – laser, IOP – intra-ocular pressure, PDR – proliferative diabetic retinopathy, DMO – diabetic macular oedema,

1  
2  
3  
4  
5  
6  
7  
8  
9  
10  
11  
12  
13  
14  
15  
16  
17  
18  
19  
20  
21  
22  
23  
24  
25  
26  
27  
28  
29  
30  
31  
32  
33  
34  
35  
36  
37  
38  
39  
40  
41  
42  
43  
44  
45  
46  
47  
48  
49

For peer review only

1  
2  
3  
4  
5  
6  
7 Title:

8 *Current treatments in Diabetic Macular Oedema: systematic review and meta-analysis*

9  
10 Authors: John A. Ford<sup>1</sup>, Noemi Lois<sup>2</sup>, Pamela Royle<sup>3</sup>, Christine Clar<sup>4</sup>, Deepson Shyangdan<sup>3</sup>, Norman  
11 Waugh<sup>3</sup>

12  
13 <sup>1</sup> [Health Technology Assessment Group, University of Aberdeen, UK](#) [Norwich Medical School,](#)  
14 [University of East Anglia, Norwich](#)

15 <sup>2</sup> [Department of Ophthalmology, NHS Grampian, Aberdeen, UK](#) [Centre for Vascular and Visual](#)  
16 [Sciences, Queens University, Belfast](#)

17 <sup>3</sup> Warwick Evidence, Division of Health Sciences, Warwick Medical School, Coventry, UK

18 <sup>4</sup> Researcher in systematic reviews, Berlin, Germany

19  
20 Corresponding author

21 Dr. John Ford

22 [Norwich Medical School](#)

23 [Faculty of Medicine and Health Sciences](#)

24 [University of East Anglia](#)

25 [Chancellors Drive](#)

26 [Norwich, NR4 7TJ](#)

27 [HTA Group](#)

28 [University of Aberdeen](#)

29 [Polwarth Building](#)

30 [Foresterhill](#)

31 [Aberdeen](#)

32 [AB25 2ZD](#)

33 [john.ford@abdn.ac.uk](mailto:john.ford@abdn.ac.uk) [uea.ac.uk](mailto:uea.ac.uk)

34 [Tel: 01224 559441](tel:01224559441) [01603 591269](tel:01603591269)

35 [Fax: 01603 593752](tel:01603593752) [01224 550925](tel:01224550925)

36 Funding: None

37 Conflicts of interest: None

38 Key words: anti-VEGF, steroid, diabetic macular oedema, ranibizumab, bevacizumab, pegaptanib,  
39 aflibercept, dexamethasone, fluocinolone, triamcinolone

40  
41 Protocol: This review was built upon several technology appraisals for NICE and therefore no  
42 protocol exists.

#### 43 Disclosure

44 The authors report no proprietary or commercial interest in any product mentioned or concept  
45 discussed in this article.

46  
47 No additional data available.

48  
49  
50  
51  
52  
53  
54  
55  
56 1  
57  
58  
59  
60

Formatted: Font: (Default) +Body (Calibri),  
11 pt, (Asian) Chinese (PRC)

Field Code Changed

**Abstract (300 words max)**

Objectives: The aim of this systematic review is to appraise the evidence for the use of anti-VEGF drugs and steroids in diabetic macular oedema (DMO) as assessed by change in best corrected visual acuity (BCVA), central macular thickness and adverse events

Data source: MEDLINE, Embase, Web of Science with Conference Proceedings and the Cochrane Library (inception to July 2012). Certain conference abstracts and drug regulatory websites were also searched.

Study eligibility criteria, participants and interventions: Randomised controlled trials were used to assess clinical effectiveness and observational trials were used for safety. Trials which assessed triamcinolone, dexamethasone, fluocinolone, bevacizumab, ranibizumab, pegaptanib or aflibercept in patients with DMO were included.

Study appraisal and synthesis methods: Risk of bias was assessed using the cochrane risk of bias tool. Study results are narratively described and, where appropriate, data was pooled using random effects meta-analysis.

Results: Anti-VEGF drugs are effective compared to both laser and placebo and seem to be more effective than steroids in improving BCVA. They have been shown to be safe in the short-term but require frequent injections. Studies assessing steroids (triamcinolone, dexamethasone, fluocinolone) have reported mixed results when compared with laser or placebo. Steroids have been associated with increased incidence of cataracts and intra-ocular pressure rise but require fewer injections, especially when steroid implants are used.

Limitations: The quality of included studies varied considerably. Five out of fourteen meta-analyses had moderate or high statistical heterogeneity.

Conclusions and implications of key findings: The anti-VEGFs, ranibizumab and bevacizumab, have consistently shown good clinical effectiveness without major unwanted side effects. Steroids results have been mixed and are usually associated with cataract formation and IOP increase.

Despite the current wider spectrum of treatments for DMO, only a small proportion of patients recover good vision ( $\geq 20/40$ ) and, thus, the search for new therapies needs to continue.

1  
2  
3  
4  
5  
6  
7  
8  
9  
10  
11  
12  
13  
14  
15  
16  
17  
18  
19  
20  
21  
22  
23  
24  
25  
26  
27  
28  
29  
30  
31  
32  
33  
34  
35  
36  
37  
38  
39  
40  
41  
42  
43  
44  
45  
46  
47  
48  
49  
50  
51  
52  
53  
54  
55  
56  
57  
58  
59  
60

Article focus

- To review the evidence for triamcinolone, dexamethasone, fluocinolone, bevacizumab, ranibizumab, pegaptanib and aflibercept in the treatment of diabetic macular oedema

Key messages

- The anti-VEGFs ranibizumab and bevacizumab, have consistently shown good clinical effectiveness in the short-term without major unwanted side effects
- Steroids results have been mixed and are usually associated with cataract formation and IOP increase

Strengthens and limitations

- A robust, detailed review of the literature has been undertaken and, when appropriate, data has been combined in meta-analysis
- The quality of studies included varied considerably.

## I - Introduction

Diabetic macular oedema (DMO) is a complication of diabetic retinopathy and a leading cause of blindness. The prevalence of DMO is likely to increase with more people suffering from diabetes.[1] Increasing DMO has significant implications for patients, healthcare providers and wider society. Laser has been the mainstay of treatment, but recently anti-vascular endothelial growth factor (anti-VEGF) drugs and steroids have been introduced as potential alternatives to laser photocoagulation.

### a. Burden of disease

Diabetic retinopathy is present at the time of diagnosis of diabetes mellitus in 0-30% of individuals.[2] The incidence is estimated to be 2.3/100 person-years for the overall diabetic population and 4.5 for patients on insulin therapy.[3] There is good evidence that progression to DMO is associated with duration of disease[4-7], poor glycaemic control [8], and in type 2 diabetes, the need for insulin[9], though the need for insulin therapy is more a marker for duration, and poor control.

The number of people with DMO is likely to increase as diabetes becomes more common. Some reports have suggested a decrease in progression to severe visual loss between 1975-1985 and 1986-2008 in a combined population of type 1 and 2.[10] Regular screening for retinopathy and better glycaemic control are thought to have reduced the progression to severe visual loss. Diabetic retinopathy is associated with a reduced quality of life. Compared with all diabetic complications, blindness was perceived to be the third worst health state after a major stroke and amputation.[11]

In the US, the presence of DMO at diagnosis is associated with 29% additional costs within the first three years compared with individuals without retinopathy at diagnosis.[12] In 2010 the estimated healthcare costs for DMO in England were £92 million, with £65.6 million being spent on hospital treatment and related costs.[13]

Visual impairment results in increased welfare costs, early retirement, and costs of home help and carers.[14] In England in 2010 (total population 52.23 million) the estimated population with diabetes was 2.34 million; the above social costs were estimated to be £11.6 million for DMO.[13]

### b. Overview of pathophysiology

DMO is caused mainly by disruption of the blood-retinal barrier. The complex pathway that leads to this disruption has been previously described in this journal.[15] Sustained hyperglycaemia causes a multi-factorial cascade of physiological processes, involving increased permeability, cytokine activation, altered blood flow, hypoxia and inflammation. Vascular endothelial growth factor-A (VEGF-A) is a major contributor to the inflammatory process and, in particular, to angiogenesis and permeability.[16] Hypoxia caused by microvascular disease stimulates release of VEGF-A to aid perfusion. There are six major isoforms of VEGF-A: 121, 145, 165, 183, 189 and 206. In addition to causing widespread microvascular injury, there is now evidence that hyperglycaemia results in preceding neuronal dysfunction, which may contribute to visual loss.[17]



1  
2  
3  
4  
5  
6  
7 c. Overview of current treatments

8 Laser photocoagulation has been the mainstay of treatment for DMO. The landmark Diabetic  
9 Retinopathy Study[18] and the Early Treatment Diabetic Retinopathy Study (ETDRS)[19,20]  
10 demonstrated its clinical effectiveness. However, although laser photocoagulation was clearly  
11 effective in preserving vision, it was less successful in restoring it, once lost. Furthermore, patients  
12 with perifoveal ischaemia are not amenable to this form of therapy. In EDTRS, although laser was  
13 shown to reduce the risk of moderate visual loss (a loss of 3 ETDRS lines) by 50%, visual acuity  
14 improved in only 3% of patients.[20] However in some recent trials, laser has improved the  
15 proportion of patients with more than or equal to 10 letters by 7-31%.[21-24] In addition, laser is not  
16 without side effects. Foveal burns, visual field defects, retinal fibrosis and laser scars have been  
17 reported.[25] Over the following decade it became apparent that certain patients suffered severe  
18 visual loss despite aggressive treatment.[26]

19  
20  
21 Steroids and anti-VEGF drugs are newer treatments in DMO. Intravitreal corticosteroids have potent  
22 anti-inflammatory effects. Triamcinolone (Kenalog) is not licensed for eye use but has been used to  
23 treat DMO for over ten years. Triamcinolone (Trivaris), more recently, was licensed for eye use. The  
24 development of intravitreal implants has allowed sustained release formulations. Fluocinolone  
25 acetonide (Iluvien, Alimera Sciences) and dexamethasone (Ozudex, Allergan) are implants that have  
26 been introduced recently.

27  
28 Anti-VEGF agents have shown efficacy compared with laser. Bevacizumab (Avastin, Genentech  
29 /Roche) is a monoclonal antibody that targets all VEGF isoforms. Although being developed for  
30 colorectal cancer, it is widely used off-label, as an intravitreal treatment for macular oedema of  
31 different aetiologies. Ranibizumab (Lucentis, Genentech/Roche) is a fragment of the bevacizumab  
32 antibody (molecular weight of ranibizumab 48.4 KDa compared with 149 KDa for bevacizumab). It  
33 was designed specifically for use in the eye. Ranibizumab is considerably more expensive than  
34 bevacizumab (the estimated cost of ranibizumab is \$2,000 per dose compared with \$50 for  
35 bevacizumab).[27] Pegaptanib (Macugen, Eyetech Pharmaceuticals/Pfizer) is a PEGylated aptamer,  
36 with a high affinity to the VEGF isoform 165 and was approved for the treatment of exudative AMD  
37 in 2004. Aflibercept (Regeneron/Bayer HealthCare) is a recent addition to the anti-VEGF class that  
38 targets all forms of VEGF-A and placental growth factor.

39  
40  
41  
42 d. Aim of the review

43  
44 The aim of this review is to provide clinicians with an up-to-date overview of current [intra-ocular](#)  
45 [drug](#) treatments for DMO. It is hoped that the information contained herein will assist clinicians to  
46 present their patients with the best evidence supporting each treatment, including possible  
47 complications. In addition, this review may be helpful to policy makers. The review focuses on the  
48 current evidence for the use of anti-VEGF drugs and steroids to treat DMO, as assessed by change in  
49 best corrected visual acuity (BCVA) (mean and proportion with more than two lines improvement),  
50 central macular thickness (CMT), as determined by optical coherence tomography (OCT), and their  
51 adverse events.

1  
2  
3  
4  
5  
6  
7 II - Evidence acquisition

8 A systematic literature search was performed. The databases searched included MEDLINE, Embase,  
9 Web of Science with Conference Proceedings and the Cochrane Library. The dates searched were  
10 from the inception of each database until July 2012  
11

12 The search terms combined the following key words:

13  
14 ranibizumab or lucentis or bevacizumab or avastin or pegaptanib or macugen or aflibercept or vegf  
15 trap-eye or steroid\* or corticosteroid\* or dexamethasone or fluocinolone or triamcinolone or anti-  
16 VEGF\* or anti-vascular endothelial growth factor\*

17  
18 AND

19  
20 diabetic macular oedema or diabetic macular oedema or diabetic retinopathy or diabetic  
21 maculopathy

22  
23 AND

24 (masked or sham or placebo OR control group or random\*) OR (systematic review or meta-analysis)  
25 OR (risk or safety or adverse or harm or pharmacovigilance or side-effect\* or precaution\* or  
26 warning\* or contraindication\* or contra-indication\* or tolerability or toxic)  
27

28 The meeting abstracts of the Association for Research in Vision and Ophthalmology, the American  
29 Diabetes Association (2002-2012) and the European Association for the Study of Diabetes were  
30 searched from 2002-2012.  
31

32 In addition the web sites of the European Medicines Agency and the US Food and Drug Association  
33 were searched for data on registration status and safety. Clinicaltrials.gov and the EU Clinical Trials  
34 Register were searched in July 2012 for data on ongoing research.  
35

36 Full details of the searches are shown in appendix 1.  
37

38 Randomised controlled trials (RCT) were used to evaluate clinical effectiveness. Safety was assessed  
39 through both RCTs and observational studies.  
40

41 RCTs were included provided that they 1) addressed the use of triamcinolone, dexamethasone,  
42 fluocinolone, bevacizumab, ranibizumab, pegaptanib or aflibercept in patients with DMO, 2) had a  
43 minimum follow-up of six months, and 3) had a minimum of 25 eyes per study arm. Studies were  
44 excluded if they 1) evaluated laser only, 2) assessed the effect of the above mentioned treatments in  
45 macular oedema due to other retinal diseases (instead of DMO), 3) used only a single dose, 4) were  
46 combined with a surgical intervention or 5) published studies in languages other than English. There  
47 were no exclusions based on drug dose. [Trials were excluded if they evaluated combined drug  
48 treatment with surgery or systemic treatment.](#)  
49

50 Search results were screened by two independent authors (JF and PR/DS). Data were extracted by  
51 one author (CC) and checked by a second (JF). Data extracted included inclusion/exclusion criteria,  
52 baseline demographics, BCVA expressed as a change in logMAR/ETDRS letters or proportion of  
53  
54  
55

56 6  
57  
58  
59  
60

1  
2  
3  
4  
5  
6  
7 participants with more than 2 or 3 lines BCVA improvement, CMT and adverse events. Risk of bias  
8 was assessed using the cochrane risk of bias tool.

9  
10 Studies were assessed for similarity in study population, interventions (dose and frequency),  
11 outcomes and time to follow up, with a view to including similar studies in a meta-analysis. Only full  
12 text articles were included. Conference abstracts were excluded from in the meta-analysis because  
13 their quality and detailed methodology was not clear. A difference of six months was allowed  
14 between study follow-ups because of potential heterogeneity from disease progression and  
15 differences in the number of doses. If prescribed. If salient data were not reported, such as standard  
16 deviations, data were sought by personal communication with authors. Data were analysed using  
17 Review Manager software. If data from multiple time points were available, the primary end point  
18 data was used. Data were entered by one author (JF) and double-checked by a second (DS). Mean  
19 difference were calculated for change in BCVA and CMT and odds ratios were calculated for  
20 proportion of participants with more than 2 lines improvement. with 95% confidence intervals  
21 were calculated for all outcomes. Statistical heterogeneity was measured through  $I^2$  scores. A score  
22 of less than 30% was considered low heterogeneity, a score of more than 70% was considered high  
23 heterogeneity and scores between 30% and 70% were considered moderate. A random effects  
24 model was used throughout. The random effects model assumes variability between studies and  
25 therefore models uncertainty into the meta-analysis. Fixed assumes no variability. Generally  
26 speaking the random effects model results in wider confidence intervals.  
27  
28  
29  
30  
31  
32  
33  
34  
35  
36  
37  
38  
39  
40  
41  
42  
43  
44  
45  
46  
47  
48  
49  
50  
51  
52  
53  
54  
55

56 7  
57  
58  
59  
60

### III - Results

The literature search identified 430 unique articles for possible inclusion, as shown in figure 1. 328 articles were excluded on the basis of title and abstract, leaving 102 full papers to be read. Fifty-one of these articles were excluded; the reasons for their exclusion are summarised in table 1. Fifty-one articles from 29 studies met the inclusion criteria and were included in the review; these are described in tables 23 to 156. Seven studies were suitable for meta-analysis.

#### a. Study quality

The quality of the included studies was, in general, good as is shown in table 246. (Note that the meeting abstracts were not quality assessed, due to lack of details reported on the methods). Most studies adequately described sequence generation, except in three studies where it was unclear.[28-30] However allocation concealment was poorly described throughout, with only eight reports addressing this issue appropriately. [31-38] Reporting of masking also varied. A number of studies masked patients using sham injection or sham laser.[21,24,29,31,33,36,39,40] [38]. Various studies reported that masking of patients was impossible. Assessors, where reported, were masked. In two studies incomplete outcomes were not addressed.[31,41] Baseline characteristics were consistent within study treatment arms. Administration of laser followed the ETDRS protocol, or a modified version, in all studies that described laser administration.[21-24,28,30,33,34,42,43] Two studies, both available only as meeting abstracts, did not report the laser administration details. [44,45]

#### b. Intravitreal anti-VEGFs

The characteristics of all published studies including design, inclusion/exclusion criteria, intervention, outcomes and their timing are shown in tables 32 to 87. Safety data for each drug is shown in tables 98 to 1645.

##### 1. Ranibizumab

Nine RCTs have evaluated ranibizumab as a potential new treatment for patients with DMO (table 32 and 87); seven were sponsored by industry, and two were an independent investigators-led.) [21,46](table 7). READ-2 was the first large RCT (n=126).[28,47] It compared ranibizumab (0.5 mg) alone, ranibizumab in combination with laser and laser alone. At six months BCVA had improved significantly in the ranibizumab alone group compared with laser alone or ranibizumab plus laser. Addition of laser to ranibizumab did not provide additional BCVA gain. REVEAL (n=396) compared ranibizumab (0.5mg) with ranibizumab plus laser and laser alone.[48] At 12 months both ranibizumab arms resulted in a statistically significantly better improvement in BCVA compared to laser alone. The addition of laser did not confer further benefit.

Within the past two years the results of RESOLVE[36], RESTORE[24], and RISE and RIDE[38] have been published in peer-reviewed journals. RESTORE (n=345) randomised similar groups as the READ-2 study (ranibizumab (0.5 mg) alone, laser alone and ranibizumab plus laser); outcomes were evaluated at 12 months. Ranibizumab improved mean BCVA, with laser providing no additional

benefit. Two year extended follow-up suggested that these results continued.[49] RESOLVE (n=151) compared two doses of ranibizumab (0.3 mg and 0.5 mg) with sham injection. The greatest improvement in BCVA at 12 months was in the 0.3 mg group (11.8 letter gain) compared to the 0.5 mg group (8.8 letters gain) or sham injection (1.4 letter loss). In this study, rescue laser was allowed after three months of treatment, if BCVA had decreased by 10 letters or more, or if the investigator considered the macula not to be flat as assessed by OCT. Only 4.9% of the ranibizumab group required rescue laser, compared with 34.7% in the sham injection group.

READ-2 and RESTORE were suitable for pooling through meta-analysis and, when doing so, it was found that ranibizumab statistically significantly improved mean BCVA compared with laser (figure 2). In regards to the proportion of patients gaining more than or equal to 15 letters, individual trials showed a statistically significant difference between laser and ranibizumab but when these two trials were pooled using a random effects model the result was no longer statistically significant. When a fixed effects model was used the result was statistically significant (figure not shown). ~~The random effects model assumes variability between studies and therefore models uncertainty into the meta-analysis. Fixed assumes no variability. Generally speaking the random effects model results in wider confidence intervals.~~ Adding laser to ranibizumab did not add any significant benefit (figure 3). In fact the mean change in BCVA and the proportion of patients with more than 15-letter gain favoured, although not statistically significantly so, ranibizumab alone compared with ranibizumab plus laser. This was probably a chance effect.

RISE (n=377) and RIDE (n=382) were identical in design. The study arms are similar to those in the RESOLVE study; 0.3 mg or 0.5 mg ranibizumab compared with sham. In the RISE study the proportion of patients with 15 or more letter gain was greatest in the 0.3 mg group at 24 months, whereas in the RIDE study this was greatest in the 0.5 mg group. In the DRCRN trial (n = 854), Elman and colleagues compared ranibizumab (0.5 mg) plus prompt (within 3-10 days post ranibizumab) or deferred ( $\geq 24$  weeks) laser with sham injection plus prompt laser, or triamcinolone (4mg, Trivaris) plus prompt laser (table 87). At one year both ranibizumab groups reported greater gains in mean BCVA change than triamcinolone or laser alone. Interestingly at 2 years (n= 628), the proportion of patients with 10 or more letter gain was not statistically significantly different between ranibizumab plus prompt laser and laser alone groups, but was statistically significant in the ranibizumab plus deferred laser compared with laser alone comparison. The reason for this is not clear.

READ-3 (n=152) has been published in abstract form and compared monthly injections of intravitreal ranibizumab high dose (2.0 mg) and low dose (0.5 mg).[50] At six months there was not a statistically significant difference in BCVA between groups.

One study (n=63), published in abstract form, was identified which directly compared monthly injections of ranibizumab (0.5 mg) with bevacizumab (1.5 mg).[51] At 48 weeks the authors found no statistically significant difference between bevacizumab and ranibizumab.

RESTORE, READ-2 and DRCRN (12 month data used) were suitable for pooling through meta-analysis to compare ranibizumab plus laser and laser alone (figure 4). Ranibizumab plus laser resulted in a statistically significantly greater change in mean BCVA, proportion of patients with more than 15 letter gain and CMT reduction versus laser alone.

1  
2  
3  
4  
5  
6  
7 | Adverse events are shown in tables [98](#) and [165](#). Conjunctival hemorrhages were higher in the  
8 ranibizumab arms compared with laser (RESTORE) or no treatment (RESOLVE). In the RESOLVE, RISE  
9 and RIDE studies a considerably higher incidence of intra-ocular pressure (IOP) increase was  
10 reported in the ranibizumab arm compared to control. This increase in IOP was not demonstrated in  
11 the RESTORE study. There were no consistent differences in systemic adverse events between  
12 ranibizumab and laser or placebo.

## 13 14 2. Bevacizumab

15 | Eight RCTs investigating the use of bevacizumab in DMO were identified (table [43](#) and [87](#)). One RCT,  
16 the BOLT study (n=80), randomised patients to laser therapy or 1.25 mg intravitreal  
17 bevacizumab.<sup>[23,52]</sup> At 24 months, the mean change in BCVA and the proportion of patients who  
18 gained 10 ETDRS letters or more was statistically significantly higher in the bevacizumab arm than in  
19 the laser arm. Faghihi and colleagues (n=80), compared 1.25 mg bevacizumab (average 2.23  
20 injections per patient) with 1.25 mg bevacizumab plus a single laser treatment (average 2.49  
21 injections per patient).<sup>[53]</sup> After six months, the authors found both treatments to be effective at  
22 improving BCVA but neither treatment was found to result in a greater benefit.

23  
24  
25 Lam and colleagues (n=52) compared two doses of bevacizumab (1.25 mg and 2.5 mg) in patients  
26 with diffuse DMO.<sup>[35]</sup> Patients with focal DMO associated with localised retinal thickening were  
27 excluded. At 6 months, following 3 initial monthly injections (no treatment in the remaining 3  
28 months), both groups showed a statistically significant increased mean BCVA compared with  
29 baseline vision, but there was no difference between doses.

30  
31 Four trials have investigated the combination of bevacizumab and triamcinolone. Ahmadi and  
32 colleagues (n=115), compared combined bevacizumab (three 1.25 mg injections at six week  
33 intervals) plus triamcinolone (2 mg baseline injection only, Triamhexal) with bevacizumab alone  
34 (three 1.25 mg at six week intervals) and sham injection in patients who had DMO unresponsive  
35 (definition not reported) to previous laser (last session more than three months prior).<sup>[31]</sup> The  
36 combination arm and bevacizumab alone arm improved mean BCVA more than sham injection. For  
37 BCVA the combination of bevacizumab plus triamcinolone was non-statistically significantly better  
38 than bevacizumab alone.

39  
40 Soheilian and colleagues (n=150) compared combined bevacizumab (1.25 mg) plus triamcinolone (2  
41 mg) with bevacizumab alone and laser alone in patients who were laser naïve.<sup>[37,41]</sup> At 36 weeks,  
42 bevacizumab alone improved BCVA more than either combination therapy or laser, although the  
43 difference was not statistically significant. Extended follow up at 24 months showed that there was  
44 no statistically significant difference between groups for BCVA, however the direction of effect  
45 favoured the bevacizumab and combination arms more than the laser.<sup>[54]</sup>

46  
47 | Lim and colleagues (n=111) also evaluated the combination of bevacizumab plus triamcinolone  
48 when compared with bevacizumab alone or triamcinolone alone.<sup>[55]</sup> At 12 months the authors  
49 found no statistically significant difference between groups for BCVA or CMT.

50  
51 The Efficacy Study of Triamcinolone and Bevacizumab Intravitreal for Treatment of Diabetic Macular  
52 Oedema (ATEMD) study, currently only published in abstract form, compared combined therapy  
53 with bevacizumab (1.25 mg) and triamcinolone (4 mg) with each of these alone.<sup>[56]</sup> At six months  
54

55  
56 10  
57  
58  
59  
60

1  
2  
3  
4  
5  
6  
7 they found no statistically significant difference between groups. One study comparing bevacizumab  
8 with ranibizumab is discussed above.[51] No bevacizumab trials were suitable for meta-analysis  
9 because treatment arms were not comparable among included studies.

10  
11 Adverse events are shown in tables 109 and 165. There was a low frequency of adverse events  
12 reported in the included trials. A higher incidence of mild anterior chamber reaction was reported in  
13 bevacizumab groups compared with controls. The incidence of IOP increase was comparable  
14 between bevacizumab and laser. Soheilian and colleagues, were the only authors to report the  
15 incidence of lens opacity.[37,41] No patients in the bevacizumab alone group were found to have  
16 lens opacities but in four patients (8%) in the bevacizumab plus triamcinolone group this finding was  
17 observed over the 36 week follow-up period.

### 18 19 3. Pegaptanib

20  
21 Two studies have evaluated pegaptanib in DMO and both compared it with sham injection (table  
22 54). Cunningham and colleagues compare three doses of pegaptanib (0.3 mg, 1 mg and 3 mg) and  
23 sham injection in laser naive patients (n=172).[39,57] At six months patients in the 0.3 mg and 1 mg  
24 groups performed statistically significantly better than those in either 3mg or sham groups. Six  
25 injections (median) were administered in the 0.3 mg and 1 mg group, whereas only five (median)  
26 injections were administered in the 3 mg group.

27  
28 The second trial (n=260), reported by Sultan and colleagues in 2011, compared pegaptanib (0.3 mg)  
29 and sham injection. At two years, the pegaptanib group showed a statistically significantly greater  
30 improvement in mean BCVA compared with sham.[40] However there was no statistically significant  
31 difference in the proportion of patients with an improvement of 10 letters or more. Patients were  
32 allowed rescue laser at the assessors' discretion (25.2% of patients in the pegaptanib group and 45%  
33 of patients in the sham group received rescue treatment). In regards to meta-analysis, data were  
34 only available to combine these trials for proportion of patients with more than 15 letter gain.  
35 Although individually neither trial demonstrated a statistically significant difference favouring  
36 pegaptanib over sham (figure 5), when pooled together in meta-analysis a statistically significant  
37 difference in favour of pegaptanib was found (OR 1.94, 95%CI 1.01 to 3.71).

38  
39 Adverse events for pegaptanib are shown in table 110. There was a higher incidence of eye pain  
40 compared to control (31% versus 17%). [39,57] Cataract formation was similar between pegaptanib  
41 and control groups. There was a higher incidence of IOP increase in the pegaptanib arm compared to  
42 control (17.4% versus 6.3%).[40]

### 43 44 4. Other anti-VEGF

45  
46 Aflibercept has been evaluated in the Da Vinci study (n=219)[30,58] (table 54). Four regimens of  
47 aflibercept (0.5 mg 4 weekly, 2 mg 4 weekly, 2 mg monthly for three months then every 8 weeks,  
48 and 2 mg monthly for three months followed by treatment as required) were compared with laser.  
49 At six months, all aflibercept arms had a statistically better BCVA and CMT change than the laser  
50 arm. The regimen that resulted in greatest BCVA gain and CMT reduction was 2 mg every 4 weeks,  
51 however statistical significance between aflibercept arms was not reported. One year extended  
52 follow-up showed that all aflibercept arms were found to have a statistically significantly better  
53 BCVA compared to laser.[58]

54  
55  
56 11  
57  
58  
59  
60



1  
2  
3  
4  
5  
6  
7 | Adverse events are shown in table 121. There was a higher incidence of IOP increase and eye pain in  
8 the aflibercept group compared with laser. Other adverse events were too infrequent to draw  
9 meaningful conclusions. The incidence of cataracts was not reported.

### 10 11 12 c. Steroids

#### 13 14 1. Dexamethasone

15  
16 | Two included trials assessed the use of dexamethasone to treat DMO (table 65); Haller 2010 (full  
17 text available)[59] and Callanan (available to date only in an abstract form).[44] Haller 2010 (n=171)  
18 compared two doses of dexamethasone, administered as an intravitreal implant (350 µm and 700  
19 µm) through a 20-gauge transscleral incision, with no treatment. At 90 days only the 700 µm group  
20 showed a statistically significant higher proportion of patients with 10 or more letter gain compared  
21 to no treatment (33% compared with 12%, p = 0.007). The 350 µm group showed a non-statistically  
22 significant improvement compared with laser alone (21% compared with 12%). At 180 days there  
23 was no statistically significant difference between either the dexamethasone group and no  
24 treatment group. The treatment effect appeared to peak at three months.

25  
26 The second trial, by Callanan and colleagues (n=253), compared dexamethasone (dose not reported)  
27 plus laser with laser alone. Although a greater improvement in mean BCVA was seen at 1-9 months  
28 in the dexamethasone plus laser group compared with laser alone, there was no statistically  
29 significant difference at 12 months. A mean of 1.6 implants were used over the 12 month period.

30  
31 These trials were not suitable for meta-analysis since one study is only available in abstract form.

32  
33 | Adverse events are shown in table 132. In the 350 µm and 700 µm groups compared with no  
34 treatment, there was a higher incidence of anterior chamber cells (29.1/26.4% compared with 1.8%),  
35 anterior chamber flare (27.3/20.8% compared with 8.8%), vitreous hemorrhage (20/22.6%  
36 compared with 5.3%) and increased IOP (14.5/9.4% compared with 0%). However there was no  
37 statistically significant difference in the cataract formation between the groups at 12 months. [59]  
38 Callanan and colleagues reported an increase in IOP in the dexamethasone plus laser group  
39 compared with laser alone (20% compared with 1.6%).[44]

#### 40 41 2. Fluocinolone

42  
43 | Two trials assessed fluocinolone implant for DMO (table 65). The FAME study (n=956) compared two  
44 doses of fluocinolone (0.2 µg/day and 0.5 µg/day) with sham injection in patients with at least one  
45 prior laser treatment.[29] Approximately 25% of patients in each group had more than one prior  
46 laser treatment. At 24 months both doses of fluocinolone showed a statistically significant  
47 improvement in mean BCVA compared to sham. There was a modest difference between  
48 fluocinolone groups. Rescue laser was given after the first six weeks for persistent oedema and was  
49 allowed every three months. 35-37% of patients in the fluocinolone group and 59% in the sham  
50 injection group required rescue laser. Extended follow-up at 36 months showed that the both  
51 fluocinolone arms continued to result in a statistically significant benefit compared with sham.[60]  
52  
53  
54  
55

56 12  
57  
58  
59  
60



Pearson and colleagues (n=196) compared fluocinolone (0.59 mg) with standard of care, either laser or no treatment.[43] At three years there was no statistically significant difference in the proportion of patients with 15 letters gain or more (31% fluocinolone compared with 20% standard of care) between groups and proportion of patients losing 15 letters or more in the fluocinolone group (17% compared with 14%). Increased incidence of cataracts may have contributed to this difference.

These trials were not suitable for meta-analysis.

Adverse events are shown in table 143. Pearson and colleagues reported a higher incidence of cataracts at three years in the fluocinolone group compared with standard of care (55.9% compared with 21.7%). In the extended report of the FAME study there was a considerably higher incidence of cataract surgery in phakic eyes in the 0.2 µg/day and 0.5µg/day fluocinolone groups (80.0% and 87.2% compared with 27.3%) and increased IOP at any point (37% and 46% compared with 12%).

Following the demonstration in the FAME trial that a lower dose was about as good as higher ones, the higher doses are unlikely to be used.

### 3. Triamcinolone

Ten trials evaluating triamcinolone were identified (table 76 and 87). All trials evaluated intravitreal administration of triamcinolone, there were no trials evaluating posterior or anterior sub-tenon injections. Two trials used Trivaris[21,61], two trials used Kenacort [32,33], one trial used Kenalog[62], one trial used Trimahexal [31] and four trials did not report the type of triamcinolone used.[34,37].[45,56] Three doses were assessed in the included studies (1 mg, 4 mg and 8 mg) and triamcinolone has been combined with laser or bevacizumab.

Ip and colleagues (n=840) were the only authors to evaluate triamcinolone 1mg (Trivaris).[22,61,63,64] They found a statistically significant improvement in mean BCVA at two years in the laser group compared with the triamcinolone group and no significant difference between 1 mg compared with 4 mg.

Several trials compared 4 mg intravitreal triamcinolone. Ip and colleagues (n=840) found that laser therapy resulted in a greater improvement in mean BCVA at two years compared to 4 mg triamcinolone (Trivaris). [22,61,63,64] Lam and colleagues (n=111), found no statistically significant difference between laser and triamcinolone at six months (triamcinolone type not reported).[34] When these two trials were pooled through meta-analysis, the treatment effect favoured laser but differences were not statistically significant (figure 6). Ockrim and colleagues (n=88) compared 4 mg intravitreal triamcinolone (Kenalog) with laser alone.[62] At 12 months they found no statistically significant BCVA improvement between the triamcinolone and laser groups. Gillies and colleagues (n=69) compared 4 mg of triamcinolone (Kenacort) with sham injection.[32] Mean BCVA improved statistically significantly with triamcinolone at 24 months compared with sham injection (3.1 letters gain compared with 2.9 letters loss, p = 0.01).

Lam and colleagues (n=111) compared triamcinolone 4 mg alone with 4 mg of triamcinolone plus laser or laser alone.[34] At six months the authors found no difference in BCVA between any of the groups. Elman and colleagues (n=854) compared 4 mg of triamcinolone (Trivaris) plus laser with ranibizumab plus prompt (within 3-10 days) or deferred (more than 24 week) laser and laser alone.[21] At two years they found a statistically significant difference in mean BCVA between

13

1  
2  
3  
4  
5  
6  
7 ranibizumab plus prompt/deferred laser compared with laser alone (7 letters gain/9 letters gain  
8 compared with 3 letters gain), but no difference with triamcinolone plus laser compared with laser  
9 alone (2 letters gain compared with 3 letters gain). Oliveira-Neto and colleagues (n=120) compared 4  
10 mg triamcinolone alone (triamcinolone type not reported) with 4 mg plus 1.25 mg bevacizumab.[56]  
11 At six months they found no statistically significant difference between groups.

12  
13 The Elman and Lam studies were suitable for meta-analysis, which showed non-statistically  
14 significant improvements in mean BCVA and the proportions of patients with more or equal than 15  
15 letter gain in the triamcinolone plus laser group compared with laser alone (figure 7).

16  
17 Adverse events are shown in table 14-15 and 165. Triamcinolone was associated with consistently  
18 higher incidences of IOP increase and cataracts. Gilles and colleagues reported a cataract rate of  
19 over 50% by three years in patients treated with triamcinolone.

#### 20 21 22 23 d. Other pertinent studies

24 Only one study in abstract form directly compared bevacizumab with ranibizumab.[51]  
25 Bevacizumab and ranibizumab have been compared through indirect comparison of five trials.[65]  
26 There was no evidence of a difference between the drugs, however wide credible intervals meant  
27 that superiority of either drug could not be excluded.  
28

29 Two-year results of the CATT (Comparison of AMD Treatment Trials) and one year results of the  
30 IVAN (Inhibit VEGF in Age-related choroidal Neovascularisation), recently published, have  
31 demonstrated a good safety profile of anti-VEGF therapies when used to treat patients with age-  
32 related macular degeneration.[66,67] The CATT study randomised 1208 patients with AMD to  
33 monthly or as required injection of either ranibizumab or bevacizumab. At 1 year the mean BCVA  
34 was similar in both groups (8.0 letter gain in bevacizumab and 8.5 in ranibizumab). Over two years,  
35 the rates of deaths, myocardial infarction and stroke did not differ between ranibizumab and  
36 bevacizumab treatment groups. However, there was a higher rate of serious adverse events in the  
37 bevacizumab compared with the ranibizumab group. This increased event rate was driven mainly  
38 by hospitalisations, (RR 1.29, 95%CI 1.01 to 1.66). However the hospitalisations were not caused by  
39 known adverse events of bevacizumab. Arterio-thrombotic events and heart failure occurred in less  
40 than 2% of participants in the IVAN, and there were more often observed in the ranibizumab group  
41 than in the bevacizumab group (p = 0.03). Further data from other ongoing clinical trials may  
42 provide more insight on the safety of anti-VEGF treatment and possible differences on this respect  
43 among available drugs.  
44  
45

46 Campbell and colleagues conducted a population based nested case-control study of 91,378 older  
47 adults with a history of physician diagnosed retinal disease.[68] The authors found that neither  
48 ranibizumab nor bevacizumab were associated with significant risks of ischaemic stroke, acute  
49 myocardial infarction, congestive heart failure, or venous thromboembolism.”  
50

51 A recent systematic review specifically assessing adverse events in anti-VEGF drugs found a low  
52 incidence of serious (below 1 in 100) and non-serious ocular events (below 1 in 500) from  
53 ranibizumab, bevacizumab and pegaptanib.[69]  
54  
55

1  
2  
3  
4  
5  
6  
7 Fung and colleagues used an internet-based survey of clinicians to assess the safety of  
8 bevacizumab.[70] The survey covered over 5000 patients and found that bevacizumab was  
9 associated with an infrequent incidence of adverse events (all less than 0.21%).

10  
11 One study which assessed diclofenac did not meet the inclusion criteria (follow-up for only 12  
12 weeks).[71] The authors randomised 32 patients to either intravitreal diclofenac or triamcinolone  
13 and found that both diclofenac and triamcinolone reduced CMT, but a statistically significant visual  
14 improvement was observed only in the triamcinolone group.

15  
16 Sfikakis and colleagues undertook a 30-week randomised crossover trial comparing infliximab and  
17 placebo.[72] The study failed to meet our inclusion criteria (only 11 patients included). The authors  
18 found that infliximab resulted in a 28.6% improvement in vision compared with 4.3% with placebo.  
19 The improvement seen with placebo could be due to a “carry over effect”, seen in cross over trials.

20  
21 The Fenofibrate Intervention and Event Lowering in Diabetes (FIELD) trial was primarily a study to  
22 see if the lipid-lowering agent fenofibrate, could reduce macrovascular and microvascular events in  
23 type 2 diabetes.[73] However a substudy within FIELD recruited 1012 patients to a retinopathy  
24 study. The primary outcome in the main study was need for laser therapy (3.4% on fenofibrate  
25 versus 4.9% on placebo) but the substudy used retinal photography to assess progression of  
26 retinopathy or development of macular oedema. The hazard ratio at six years for DMO was 0.69  
27 (95%CI 0.54 to 0.87) in the fenofibrate group compared to placebo.

28  
29 Ruboxistaurin is another oral agent which has been assessed for the treatment of DMO. Aiello and  
30 colleagues randomised 686 patients to receive placebo or one of three doses of ruboxistaurin.  
31 [74,75] There was no statistically significant difference in delay to sight-threatening DMO in any  
32 ruboxistaurin group compared to placebo. The authors suggest that differences in laser treatment  
33 between groups may have contributed to the non-significant finding.

#### 34 35 36 37 e. Assessment of heterogeneity within meta-analysis

38  
39 Heterogeneity was assessed methodologically and statistically. Methodological heterogeneity was  
40 assessed by comparing study population, interventions, outcome measures and follow-up. Studies  
41 that were not methodologically comparable were excluded from the meta-analysis. For example  
42 bevacizumab trials were not pooled because Soheilian and colleagues included patients who were  
43 laser naïve[37] and Ahmadiéh and colleagues included patients who were unresponsive to laser.[31]  
44 Some analyses were also excluded because sufficient details were not reported in the studies. For  
45 example several studies failed to report standard deviations.[35,39]

46  
47 Statistical heterogeneity was assessed through  $I^2$  scores. High statistical heterogeneity was found in  
48 two analyses (2.3, 4.3). Therefore these results should be interpreted with due caution. Moderate  
49 heterogeneity was found in three analyses (2.2, 3.1, 3.2). Low heterogeneity was found in the  
50 remaining eight analyses.

#### 51 52 53 54 f. Ongoing trials

55  
56 15  
57  
58  
59  
60

1  
2  
3  
4  
5  
6  
7  
8  
9  
10  
11  
12  
13  
14  
15  
16  
17  
18  
19  
20  
21  
22  
23  
24  
25  
26  
27  
28  
29  
30  
31  
32  
33  
34  
35  
36  
37  
38  
39  
40  
41  
42  
43  
44  
45  
46  
47  
48  
49  
50  
51  
52  
53  
54  
55  
56  
57  
58  
59  
60

There are numerous on-going studies listed in appendix 2. The most salient studies include a study to compare ranibizumab and bevacizumab (Schmidt-Erfurth), a study investigating rescue ranibizumab treatment for patients who have failed on bevacizumab (Chaudhry), a study evaluating two algorithms for ranibizumab, 'treat and extend' and 'as required' (RETAIN), further studies of Trap-eye (VIVID and VISTA) and trials which are examining the use of NSAIDs, such as diclofenac and nepafenac (NEVANAC and Soheilian).

#### IV – Discussion

It appears that anti-VEGF treatment is effective in DMO, especially ranibizumab and bevacizumab. Meta-analysis of available short-term data (up to 2 years) suggests that ranibizumab is superior to laser and that adding laser to ranibizumab treatment does not confer additional benefit. Steroid treatment has demonstrated mixed success and, almost uniformly, increased incidence of cataracts and increased IOP. The licence for fluocinolone takes note of this and it is positioned as a treatment when others have failed.

##### a. Strengths and limitations of the review

There are a number of strengths of this review. A robust systematic review methodology was used. Reliability was improved by excluding trials with small sample sizes or short follow up. Since a number of trials included similar intervention arms, consistent treatment effects further improve reliability. Validity was improved by assessing the quality of trials using the Cochrane risk of bias tables. Including abstracts from ARVO provided up to date results. Pooling results through meta-analysis provided further evidence. The random effects model was used throughout to allow for heterogeneity among studies.

This review, however, has limitations. Although the inclusion of abstracts provides a more up to date results, the studies contained in these abstracts could not be assessed for risk of bias and should therefore be interpreted with caution. In addition, reporting of quality assessment criteria was variable. Allocation concealment was especially poorly reported. There was only one study which compared different anti-VEGFs<sup>[51]</sup> and none that compared steroids (fluocinolone vs dexamethasone vs. triamcinolone). Therefore it is difficult to assess the effectiveness within drug classes. As with any meta-analysis questions of heterogeneity arise. Follow-up periods varied among studies. A difference of six months was allowed for studies to be pooled for meta-analysis but this could have still resulted in heterogeneity. High statistical heterogeneity was found in a quarter of analyses. Furthermore because of the low number of trials included, publication bias could not be assessed by funnel plot analysis. The manufacturers funded most of the trials for ranibizumab, pegaptanib, dexamethasone and fluocinolone, whereas trials for bevacizumab and triamcinolone were generally funded by non-pharmaceutical organisations. Generally, the non-commercial studies had smaller numbers, perhaps because of funding restraints.

It is important to note that there may be differences in laser treatment protocol between studies. This applies to trials which combine drug treatments with laser or include laser as a comparator. All studies referred to the ETDRS protocol [19,20] or a modified version of it. In the ETDRS, once the diagnosis of clinically significant macular oedema was made, an angiogram was obtained to identify "treatable lesions". "Treatable lesions" included discrete points of retinal hyperfluorescence or leakage (most of these are often microaneurisms), areas of diffuse leakage within the retina related to microaneurisms, intraretinal microvascular abnormalities, diffusely leaking retinal capillary bed and retinal avascular zones. In the ETDRS protocol, treatment of lesions closer than 500 microns from the centre of the macula was not required initially; however if vision was less than 20/40 and the oedema and leakage persisted, treatment up to 300 microns from the

1  
2  
3  
4  
5  
6  
7 centre of the macula was recommended unless there was capillary dropout; in the latter case  
8 treatment was not recommended as it may lead to further loss of perifoveal capillaries

9  
10 However in routine clinical practice clinicians generally use lighter and less intense treatment than  
11 specified in the ETDRS protocol.[76] In addition, some centres do not use fluorescein angiography  
12 (unlike the ETDRS study[19]) to guide treatment. The exact adherence to the ETDRS protocol within  
13 studies is unclear. For example, in the BOLT study a modified ETDRS protocol was used. One of the  
14 aims of the protocol was “not darkening/whitening of microaneuysms”, which is not consistent with  
15 the ETDRS protocol.

#### 16 17 18 b. Interpretation of the results

19  
20 The anti-VEGF drugs appear to be clinically effective in treating DMO in short-term studies (up to 2  
21 years). Ranibizumab has the most robust evidence base and has shown superiority compared to  
22 laser and sham injection in all trials and meta-analyses, except for the proportion of patients with 10  
23 or more letter gain in the DRCR.net study published by Elman and colleagues at two years follow  
24 up.[46] Adding laser to ranibizumab conferred no benefit. Bevacizumab has also been shown to be  
25 superior to laser. Three doses have been used (1.25 mg, 1.5 mg and 2.5 mg). The higher dose does  
26 not appear to add further benefit, and most studies in the literature use 1.25 mg. Addition of  
27 triamcinolone to bevacizumab did not provide further benefits. Pegaptanib has only been compared  
28 to sham injection. Mean change in BCVA favoured pegaptanib, but only through meta-analysis did  
29 the proportion of patients with more than 15 letter gain favour pegaptanib. Further published data  
30 are required before drawing conclusions on aflibercept. However although the anti-VEGF drugs are a  
31 significant advance, they fail to improve BCVA by 10 or more letters in half or more patients, and so  
32 they do not provide a complete answer to DMO.

33  
34  
35 Steroid treatments have inconsistent results and are undoubtedly associated with increased IOP and  
36 cataract. The effects of dexamethasone appear to peak at three months. At six months there was no  
37 significant difference compared with laser. This might imply that earlier re-treatment is needed if  
38 the beneficial effect is to be maintained, but increasing the number of treatments would likely  
39 increase the associated complications, especially with the relatively large needle size. The addition  
40 of laser did not appear to add further benefit. There was no significant difference in cataract  
41 formation at six months with dexamethasone compared to observation but it is likely that a higher  
42 incidence of cataracts would be seen with longer follow-up. Significantly more patients suffered  
43 increased IOP in the dexamethasone group compared with observation. Fluocinolone has been  
44 shown to be effective compared with sham injection (FAME)[29,60], however when compared to  
45 standard of care (laser or observation at clinician’s discretion) there was no significant difference in  
46 the proportion of patients with a 15 letter or more gain. Both studies reported higher incidence of  
47 cataract formation in the fluocinolone group, over 80% at three years at the higher dose. Results for  
48 triamcinolone are inconsistent. Ip and colleagues found that laser was more effective[61], others  
49 have found no statistically significant difference. Triamcinolone combined with laser, however,  
50 seemed to have similar efficacy as ranibizumab combined with laser in pseudophakic eyes.[21,46]  
51 Triamcinolone is more effective than sham injection. Triamcinolone has consistently been associated  
52 with increased incidence of cataract and raised IOP.

53  
54  
55  
56 18  
57  
58  
59  
60

1  
2  
3  
4  
5  
6  
7 Steroids and laser therapy may affect CMT in a different manner from anti-VEGF drugs. For example,  
8 when ranibizumab alone is compared with ranibizumab plus laser, ranibizumab alone appears to be  
9 more effective in terms of mean change in BCVA and proportion of patients with more than 15  
10 letters gain. However ranibizumab plus laser is more effective at reducing CMT. Furthermore when  
11 triamcinolone plus laser is compared with ranibizumab plus laser, ranibizumab plus laser appears to  
12 be more effective in terms of change in BCVA and proportion of patients with more than 15 letters  
13 gain, but triamcinolone plus laser is more effective at reducing CMT. The reasons for this are  
14 unclear. There is a weak correlation between CMT and BCVA. However the long term benefits of  
15 reducing CMT are currently unknown.  
16

17 No large observational studies were identified that compared anti-VEGF drugs. Fung and colleagues,  
18 using an internet based survey, found the incidence of adverse events in bevacizumab to be low.[70]  
19 One small outbreak of sterile endophthalmitis was reported with a single batch of bevacizumab in  
20 Canada, emphasising the need for sterility when preparing aliquots.[77] Curtis and colleagues  
21 carried out a very large retrospective cohort study in 146,942 patients aged 65 and over with age-  
22 related macular degeneration (AMD).[78] Their aim was to examine the cardiovascular outcomes in  
23 patients treated with the four options: photodynamic therapy (PDT), pegaptanib, bevacizumab and  
24 ranibizumab. The authors reported that one of their comparisons showed an increase in overall  
25 mortality and stroke risk with bevacizumab compared to ranibizumab, with hazard ratios 0.86  
26 (95%CI 0.75 to 0.98) and 0.78 (0.64 to 0.96) respectively. However because of the very large cost  
27 differences between bevacizumab and ranibizumab, the authors noted that selection bias might be  
28 operating, with poorer people (with poorer health) more likely to be treated with bevacizumab.  
29 They therefore carried out another analysis using only ophthalmological clinics which used only one  
30 drug, to avoid selection bias. This analysis showed no significant difference: overall mortality hazard  
31 ratio for ranibizumab 1.10 (95%CI 0.85 to 1.141); MI 0.87 (0.53 to 1.14); stroke 0.87 (0.61 to 1.24).  
32  
33

34 Gower and colleagues analysed 77,886 anti-VEGF injections from Medicare data (46% ranibizumab  
35 and 54% bevacizumab).[79] Results have only been published in abstract form. The authors found an  
36 increased risk of overall mortality and cerebrovascular events in the bevacizumab group (HR 1.11  
37 99%CI 1.01 to 1.23 and 1.57, 1.04 to 2.37 respectively). There was no statistically significant  
38 increased risk in the ranibizumab group. The authors acknowledge that a limitation of the study is a  
39 failure to adjust for important confounding factors (such as smoking, hypertension and  
40 hyperlipidaemia). Considering the cost difference, it is likely that patients treated with bevacizumab  
41 would have been in a lower socio-economic class and therefore would be at high risk of mortality  
42 and vascular disease.  
43  
44

#### 45 46 c. Implications for clinicians 47

48 The anti-VEGF drugs appear to be a significant advance in the treatment of DMO and are regarded  
49 now as the treatment of choice for patients affected by this condition. Studies assessing the  
50 effectiveness of steroids have reported mixed results. The high rates of cataract and increased IOP  
51 are a drawback. Triamcinolone combined with laser may be a good option for pseudophakic patients  
52 and may be more cost-effective than treatment with ranibizumab. However the need for fewer  
53 administrations, potentially one every three years with fluocinolone, is advantageous. From an  
54 administration perspective, some patients might prefer infrequent steroid injections with a sizeable  
55

56 19  
57  
58  
59  
60



1  
2  
3  
4  
5  
6  
7 risk of cataract, and a small, but existent, risk of glaucoma, to frequent anti-VEGF injections, even if  
8 the potential gain may not be fully comparable. Steroids may be also considered for patients that do  
9 not adequately respond to anti-VEGFs. Currently, the role of laser in the treatment of DMO is  
10 debatable. Short term data from available trials have demonstrated the superiority of anti-VEGF  
11 with regards to laser treatment and have failed to demonstrate a benefit of combining both  
12 treatment approaches. It is possible that some ophthalmologists may still opt to offer laser  
13 treatment to patients with very focal areas of leakage.

14  
15 Currently there is more evidence for the effectiveness of ranibizumab and bevacizumab than for  
16 pegaptanib and VEGF-trap eye. The results of direct head to head trials of ranibizumab and  
17 bevacizumab are awaited. Bevacizumab is not licensed for intraocular use but costs considerably  
18 less than other forms of therapy. Ranibizumab is licensed and more expensive, but its use is  
19 supported by large manufacturer funded trials demonstrating its clinical effectiveness. In the UK,  
20 the General Medical Council recommends that unlicensed medications should only be prescribed if  
21 “an alternative, licensed medicine would not meet the patient’s needs” and there is “a sufficient  
22 evidence base and/or experience of using the medication to demonstrate its safety and  
23 efficacy”.<sup>[80]</sup> The FDA says that when using a drug “off-label” clinicians “have the responsibility to  
24 be well informed about the product, to base its use on firm scientific rationale and on sounded  
25 medical evidence, and to maintain records of the product's use and effects”.<sup>[81]</sup> Patients should be  
26 fully aware of the use of any unlicensed medication and consent to any safety or efficacy  
27 uncertainties.

28  
29 The place of intravitreal steroids needs consideration now that we have the anti-VEGFs drugs, as  
30 does the role of laser. The anti-VEGFs drugs may now be the first-line treatment in place of laser,  
31 with laser being used selectively for focal lesions, and in sequence after anti-VEGF therapy once the  
32 retinal thickness has been reduced. However it should be noted that about half of patients do not  
33 get good results with anti-VEGFs. In RESTORE, only 50% of patients had gains in VA of 10 or more  
34 letters. So the anti-VEGFs are “game-changers” but their impact should not be over-estimated.

35  
36 In those who do not respond to anti-VEGFs or laser, there remains a place for steroids, despite their  
37 high adverse effect rates. The European licence for fluocinolone recognises this, by stating that it  
38 should be used when other therapies have not had sufficient effect.<sup>[82]</sup> The commonest adverse  
39 effect is cataract, but that is very common in people with diabetes, and many are already  
40 pseudophakic when treatment of DMO is required.

41  
42  
43 [Vitreoretinal surgery for the treatment of DMO was not included in our review. Laidlaw reviewed](#)  
44 [the literature and only found evidence for vitrectomy when there was signs of clinical or OCT](#)  
45 [traction.](#)<sup>[83]</sup> [However even in these cases, the evidence was not strong.](#)

#### 46 47 48 49 d. Implications for policy makers

50 In the UK, the National Institute of Health and Clinical Excellence (NICE) has recently made the  
51 decision not to recommend ranibizumab for the treatment of DMO.<sup>[84]</sup> NICE concluded that  
52 ranibizumab, although clinically effective, was not cost-effective compared to laser therapy.  
53 Bevacizumab is less than a tenth of the cost of ranibizumab. Bevacizumab is unlikely to be licensed.

54  
55  
56 20  
57  
58  
59  
60



1  
2  
3  
4  
5  
6  
7 This beckons the question as to whether policy makers should recommend cheaper unlicensed  
8 medications over a more expensive licensed alternative when efficacy and side effects appear  
9 similar.

10  
11  
12 e. Unanswered questions

13  
14 Several unanswered questions remain. Studies evaluating the effectiveness of ranibizumab  
15 compared with bevacizumab are needed. Although the anti-VEGFs are clinically effective and a  
16 major step forward in the management of DMO, it has to be noted that they have little effect in a  
17 large number of patients. Generally speaking, the proportion of patients who have demonstrated 10  
18 or more letter gain using anti-VEGFs is between 30-50% in the trials that demonstrate greatest  
19 effectiveness. Most of these patients would not achieve the 20/40 visual acuity required for driving.  
20 More effective treatments, or combinations of treatments, are required.

21  
22 There is a lack of specific evidence for the use of anti-VEGF drugs or steroids in patients with macular  
23 ischemia secondary to DMO. A number of trials excluded patients with macular  
24 ischemia.[23,34,35,40,53,62] The RESTORE trial included patients with macular ischemia and  
25 undertook a subgroup analysis.[24] The authors compared patients with (n=34) and without (n=35)  
26 macular ischemia at baseline. They found that those without macular ischemia responded better to  
27 ranibizumab (mean average change in BCVA at 12 months 7.2 letters gain compared with 6.3  
28 letters). Larger trials are needed to assess the use of anti-VEGF drugs and steroids in patients with  
29 macular ischemia.

30  
31 The duration of treatment is as yet uncertain. Most of the included studies use a retreatment  
32 protocol based on clinical need or OCT results. For example, in the BOLT study patients received a  
33 median of 9 injections of bevacizumab over 24 months.[23,85] However, it is not yet known how  
34 frequent long-term maintenance injections will be needed for and whether laser treatment in  
35 sequence could potentially reduce the number of anti-VEGF injections required. Other treatment  
36 strategies to apply laser, such as using laser power at sub-threshold levels, may prove more  
37 effective.[86] Future trials should use active comparators which are used in routine clinical practice  
38 and avoid placebo controlled trials.  
39  
40  
41  
42  
43  
44  
45  
46  
47  
48  
49  
50  
51  
52  
53  
54  
55

## V - Conclusion

This review evaluated current treatments for DMO. Undoubtedly, the use of anti-VEGFs heralds a new era for patients who suffer from DMO. Currently, the anti-VEGFs ranibizumab and bevacizumab, have consistently shown good clinical effectiveness without major unwanted side effects. Steroids results have been mixed and are usually associated with cataract formation and IOP increase. Based on the short term data available, adding laser therapy to anti-VEGFs does not appear to confer additional benefit.

Despite the current wider spectrum of treatments for DMO, only a small proportion of patients recover good vision ( $\geq 20/40$ ) and, thus, the search for new therapies to prevent and manage DMO needs to continue.

1  
2  
3  
4  
5  
6  
7  
8  
9  
10  
11  
12  
13  
14  
15  
16  
17  
18  
19  
20  
21  
22  
23  
24  
25  
26  
27  
28  
29  
30  
31  
32  
33  
34  
35  
36  
37  
38  
39  
40  
41  
42  
43  
44  
45  
46  
47  
48  
49  
50  
51  
52  
53  
54  
55  
56  
57  
58  
59  
60

Contribution of authors

JF screened titles, checked data extraction, performed the meta-analysis and drafted manuscript. NL conceived the idea, interpreted the results and provided clinical expertise throughout. PR performed the literature search, updated the searches, screened titles and managed the references. CC extracted data from the studies. DS screened titles and checked the meta-analysis. NW designed the review and supervised the running of the study. All authors contributed to the final draft.

For peer review only

## Reference List

1. Holman N, Forouhi NG, Goyder E, et al. The Association of Public Health Observatories (APHO) Diabetes Prevalence Model: estimates of total diabetes prevalence for England, 2010-2030. *Diabet Med* 2011;28:575-82.
2. Williams R, Airey M, Baxter H, et al. Epidemiology of diabetic retinopathy and macular oedema: a systematic review. *Eye (Lond)* 2004;18:963-83.
3. Henricsson M, Sellman A, Tyrberg M, et al. Progression to proliferative retinopathy and macular oedema requiring treatment. Assessment of the alternative classification of the Wisconsin Study. *Acta Ophthalmol Scand* 1999;77:218-23.
4. Chen E, Looman M, Laouri M, et al. Burden of illness of diabetic macular edema: literature review. *Curr Med Res Opin* 2010;26:1587-97.
5. Hirai FE, Knudtson MD, Klein BE, et al. Clinically significant macular edema and survival in type 1 and type 2 diabetes. *Am J Ophthalmol* 2008;145:700-6.
6. Klein R, Klein BE, Moss SE, et al. The Wisconsin Epidemiologic Study of Diabetic Retinopathy: XVII. The 14-year incidence and progression of diabetic retinopathy and associated risk factors in type 1 diabetes. *Ophthalmology* 1998;105:1801-15.
7. Klein R, Knudtson MD, Lee KE, et al. The Wisconsin Epidemiologic Study of Diabetic Retinopathy XXIII: the twenty-five-year incidence of macular edema in persons with type 1 diabetes. *Ophthalmology* 2009;116:497-503.
8. Knudsen LL, Lervang HH, Lundbye-Christensen S, et al. The North Jutland County Diabetic Retinopathy Study (NCDRS) 2. Non-ophthalmic parameters and clinically significant macular oedema. *Br J Ophthalmol* 2007;91:1593-5.
9. Thomas RL, Dunstan F, Luzio SD, et al. Incidence of diabetic retinopathy in people with type 2 diabetes mellitus attending the Diabetic Retinopathy Screening Service for Wales: retrospective analysis. *BMJ* 2012;344:e874.
10. Wong TY, Mwamburi M, Klein R, et al. Rates of progression in diabetic retinopathy during different time periods: a systematic review and meta-analysis. *Diabetes Care* 2009;32:2307-13.
11. Huang ES, Brown SE, Ewigman BG, et al. Patient perceptions of quality of life with diabetes-related complications and treatments. *Diabetes Care* 2007;30:2478-83.
12. Shea AM, Curtis LH, Hammill BG, et al. Resource use and costs associated with diabetic macular edema in elderly persons. *Arch Ophthalmol* 2008;126:1748-54.
13. Minassian DC, Owens DR, Reidy A. Prevalence of diabetic macular oedema and related health and social care resource use in England. *Br J Ophthalmol* 2012;96:345-9.
14. Happich M, Reitberger U, Breitschdel L, et al. The economic burden of diabetic retinopathy in Germany in 2002. *Graefes Arch Clin Exp Ophthalmol* 2008;246:151-9.

15. Bhagat N, Grigorian RA, Tutela A, et al. Diabetic macular edema: pathogenesis and treatment. *Surv Ophthalmol* 2009;54:1-32.
16. Murata T, Ishibashi T, Khalil A, et al. Vascular endothelial growth factor plays a role in hyperpermeability of diabetic retinal vessels. *Ophthalmic Res* 1995;27:48-52.
17. Barile GR, Pachydaki SI, Tari SR, et al. The RAGE axis in early diabetic retinopathy. *Invest Ophthalmol Vis Sci* 2005;46:2916-24.
18. The Diabetic Retinopathy Study Research Group. Preliminary report on effects of photocoagulation therapy. *Am J Ophthalmol* 1976;81:383-96.
19. Early Treatment Diabetic Retinopathy Study research group. Photocoagulation for diabetic macular edema. Early Treatment Diabetic Retinopathy Study report number 1. *Arch Ophthalmol* 1985;103:1796-806.
20. Early Treatment Diabetic Retinopathy Study research group. Treatment techniques and clinical guidelines for photocoagulation of diabetic macular edema. Early Treatment Diabetic Retinopathy Study Report Number 2. *Ophthalmology* 1987;94:761-74.
21. Elman MJ, Aiello LP, Beck RW, et al. Randomized trial evaluating ranibizumab plus prompt or deferred laser or triamcinolone plus prompt laser for diabetic macular edema. *Ophthalmology* 2010;117:1064-77.
22. Ip MS, Bressler SB, Antoszyk AN, et al. A randomized trial comparing intravitreal triamcinolone and focal/grid photocoagulation for diabetic macular edema: baseline features. *Retina* 2008;28:919-30.
23. Michaelides M, Kaines A, Hamilton RD, et al. A prospective randomized trial of intravitreal bevacizumab or laser therapy in the management of diabetic macular edema (BOLT study) 12-month data: report 2. *Ophthalmology* 2010;117:1078-86.
24. Mitchell P, Bandello F, Schmidt-Erfurth U, et al. The RESTORE study: ranibizumab monotherapy or combined with laser versus laser monotherapy for diabetic macular edema. *Ophthalmology* 2011;118:615-25.
25. Lovestam-Adrian M, Agardh E. Photocoagulation of diabetic macular oedema--complications and visual outcome. *Acta Ophthalmol Scand* 2000;78:667-71.
26. Lee CM, Olk RJ. Modified grid laser photocoagulation for diffuse diabetic macular edema. Long-term visual results. *Ophthalmology* 1991;98:1594-602.
27. Nwanze CC, Akinwale A, Adelman RA. Bevacizumab vs. Ranibizumab in Preserving or Improving Vision in Patients with Wet, Age-Related Macular Degeneration: A Cost-effectiveness Review. *Clinical Medicine Insights: Therapeutics* 2012;4:29-38.
28. Nguyen QD, Shah SM, Khwaja AA, et al. Two-year outcomes of the ranibizumab for edema of the mAcula in diabetes (READ-2) study. *Ophthalmology* 2010;117:2146-51.
29. Campochiaro PA, Brown DM, Pearson A, et al. Long-term benefit of sustained-delivery fluocinolone acetonide vitreous inserts for diabetic macular edema. *Ophthalmology* 2011;118:626-35.

- 1
- 2
- 3
- 4
- 5
- 6
- 7 30. Do DV, Schmidt-Erfurth U, Gonzalez VH, et al. The DA VINCI Study: phase 2 primary results of
- 8 VEGF Trap-Eye in patients with diabetic macular edema. *Ophthalmology* 2011;118:1819-26.
- 9
- 10 31. Ahmadieh H, Ramezani A, Shoeibi N, et al. Intravitreal bevacizumab with or without
- 11 triamcinolone for refractory diabetic macular edema; a placebo-controlled, randomized
- 12 clinical trial. *Graefes Arch Clin Exp Ophthalmol* 2008;246:483-9.
- 13
- 14 32. Gillies MC, Sutter FK, Simpson JM, et al. Intravitreal triamcinolone for refractory diabetic
- 15 macular edema: two-year results of a double-masked, placebo-controlled, randomized
- 16 clinical trial. *Ophthalmology* 2006;113:1533-8.
- 17
- 18 33. Gillies MC, McAllister IL, Zhu M, et al. Intravitreal triamcinolone prior to laser treatment of
- 19 diabetic macular edema: 24-month results of a randomized controlled trial. *Ophthalmology*
- 20 2011;118:866-72.
- 21
- 22 34. Lam DS, Chan CK, Mohamed S, et al. Intravitreal triamcinolone plus sequential grid laser
- 23 versus triamcinolone or laser alone for treating diabetic macular edema: six-month
- 24 outcomes. *Ophthalmology* 2007;114:2162-7.
- 25
- 26 35. Lam DS, Lai TY, Lee VY, et al. Efficacy of 1.25 MG versus 2.5 MG intravitreal bevacizumab for
- 27 diabetic macular edema: six-month results of a randomized controlled trial. *Retina*
- 28 2009;29:292-9.
- 29
- 30 36. Massin P, Bandello F, Garweg JG, et al. Safety and efficacy of ranibizumab in diabetic
- 31 macular edema (RESOLVE Study): a 12-month, randomized, controlled, double-masked,
- 32 multicenter phase II study. *Diabetes Care* 2010;33:2399-405.
- 33
- 34 37. Soheilian M, Ramezani A, Bijanzadeh B, et al. Intravitreal bevacizumab (avastin) injection
- 35 alone or combined with triamcinolone versus macular photocoagulation as primary
- 36 treatment of diabetic macular edema. *Retina* 2007;27:1187-95.
- 37
- 38 38. Nguyen QD, Brown DM, Marcus DM, et al. Ranibizumab for diabetic macular edema: results
- 39 from 2 phase III randomized trials: RISE and RIDE. *Ophthalmology* 2012;119:789-801.
- 40
- 41 39. Cunningham ET, Jr., Adamis AP, Altaweel M, et al. A phase II randomized double-masked
- 42 trial of pegaptanib, an anti-vascular endothelial growth factor aptamer, for diabetic macular
- 43 edema. *Ophthalmology* 2005;112:1747-57.
- 44
- 45 40. Sultan MB, Zhou D, Loftus J, et al. A phase 2/3, multicenter, randomized, double-masked, 2-
- 46 year trial of pegaptanib sodium for the treatment of diabetic macular edema.
- 47 *Ophthalmology* 2011;118:1107-18.
- 48
- 49 41. Soheilian M, Ramezani A, Obudi A, et al. Randomized trial of intravitreal bevacizumab alone
- 50 or combined with triamcinolone versus macular photocoagulation in diabetic macular
- 51 edema. *Ophthalmology* 2009;116:1142-50.
- 52
- 53 42. Sivaprasad S, Ockrim Z, Massaoutis P, et al. Posterior hyaloid changes following intravitreal
- 54 triamcinolone and macular laser for diffuse diabetic macular edema. *Retina* 2008;28:1435-
- 55 42.
- 56
- 57 43. Pearson PA, Comstock TL, Ip M, et al. Fluocinolone acetonide intravitreal implant for diabetic
- 58 macular edema: a 3-year multicenter, randomized, controlled clinical trial. *Ophthalmology*
- 59 2011;118:1580-7.
- 60

- 1
- 2
- 3
- 4
- 5
- 6
- 7 44. Callanan D, Gupta S, Ciulla TA, et al. Efficacy and safety of combination therapy with  
8 dexamethasone intravitreal implant (DEX Implant) plus laser photocoagulation versus  
9 monotherapy with laser for treatment of diffuse diabetic macular edema (DDME) [abstract].  
10 *Invest Ophthalmol Vis Sci* 22-4-2011;52:E-Abstract 3968.
- 11
- 12 45. Kim Y, Kang S, Yi CH. Three-year follow-up of intravitreal triamcinolone acetonide injection  
13 and macular laser photocoagulation for diffuse diabetic macular edema [abstract]. *Invest*  
14 *Ophthalmol Vis Sci* 11-4-2010;51:E-Abstract 4260.
- 15
- 16 46. Elman MJ, Bressler NM, Qin H, et al. Expanded 2-year follow-up of ranibizumab plus prompt  
17 or deferred laser or triamcinolone plus prompt laser for diabetic macular edema.  
18 *Ophthalmology* 2011;118:609-14.
- 19
- 20 47. Nguyen QD, Shah SM, Heier JS, et al. Primary End Point (Six Months) Results of the  
21 Ranibizumab for Edema of the mACula in diabetes (READ-2) study. *Ophthalmology*  
22 2009;116:2175-81.
- 23
- 24 48. Ohji M, Ishibashi T, Sr., REVEAL study group. Efficacy and safety of ranibizumab 0.5 Mg as  
25 monotherapy or adjunctive to laser versus laser monotherapy in Asian patients with visual  
26 impairment due to diabetic macular edema: 12-month results of the REVEAL Study  
27 [abstract]. *Invest Ophthalmol Vis Sci* 26-3-2012;53:E-Abstract 4664.
- 28
- 29 49. Mitchell P, RESTORE extension study group. 2-year safety and efficacy outcome of  
30 ranibizumab 0.5 mg in patients with visual impairment due to diabetic macular edema  
31 (DME): an interim analysis of the RESTORE extension study [abstract]. *Invest Ophthalmol Vis*  
32 *Sci* 26-3-2012;53:E-Abstract 4667.
- 33
- 34 50. Do DV, Campochiaro PA, Boyer DS, et al. 6 month results of the READ 3 Study: Ranibizumab  
35 for Edema of the mACula in Diabetes [abstract]. *Invest Ophthalmol Vis Sci* 26-3-2012;53:E-  
36 Abstract 5282.
- 37
- 38 51. Jorge R, Nepomuceno AB, Takaki E, et al. A prospective randomized trial of intravitreal  
39 bevacizumab versus ranibizumab for the management of refractory diabetic macular edema  
40 [abstract]. *Invest Ophthalmol Vis Sci* 26-3-2012;53:E-Abstract 347.
- 41
- 42 52. Michaelides M, Fraser-Bell S, Hamilton R, et al. Macular perfusion determined by fundus  
43 fluorescein angiography at the 4-month time point in a prospective randomized trial of  
44 intravitreal bevacizumab or laser therapy in the management of diabetic macular edema  
45 (Bolt Study): Report 1. *Retina* 2010;30:781-6.
- 46
- 47 53. Faghihi H, Esfahani MR, Harandi ZA, et al. Intravitreal bevacizumab vs. combination of  
48 intravitreal bevacizumab plus macular photocoagulation in clinically significant diabetic  
49 macular edema: 6 months results of a randomized clinical trial. *Iranian J of Ophthalmol*  
50 2010;22:21-6.
- 51
- 52 54. Soheilian M, Garfami KH, Ramezani A, et al. Two-year results of a randomized trial of  
53 intravitreal bevacizumab alone or combined with triamcinolone versus laser in diabetic  
54 macular edema. *Retina* 2012;32:314-21.
- 55
- 56 55. Lim JW, Lee HK, Shin MC. Comparison of intravitreal bevacizumab alone or combined with  
57 triamcinolone versus triamcinolone in diabetic macular edema: a randomized clinical trial.  
58 *Ophthalmologica* 2012;227:100-6.
- 59
- 60

- 1  
2  
3  
4  
5  
6  
7  
8  
9  
10  
11  
12  
13  
14  
15  
16  
17  
18  
19  
20  
21  
22  
23  
24  
25  
26  
27  
28  
29  
30  
31  
32  
33  
34  
35  
36  
37  
38  
39  
40  
41  
42  
43  
44  
45  
46  
47  
48  
49  
50  
51  
52  
53  
54  
55  
56  
57  
58  
59  
60
56. Oliveira Neto HL, Andrade RE, Casella M, et al. A randomized clinical trial to compare the efficacy and safety of isolated or combined intravitreal injection of triamcinolone acetonide and bevacizumab for diabetic macular edema ATEMED protocol - A Brazilian clinical trial [abstract]. *Invest Ophthalmol Vis Sci* 22-4-2011;52:E-Abstract 5331.
  57. Adamis AP, Altaweel M, Bressler NM, et al. Changes in retinal neovascularization after pegaptanib (Macugen) therapy in diabetic individuals. *Ophthalmology* 2006;113:23-8.
  58. Do DV, Nguyen QD, Boyer D, et al. One-year outcomes of the DA VINCI Study of VEGF Trap-Eye in eyes with diabetic macular edema. *Ophthalmology* 24-4-2012.
  59. Haller JA, Kuppermann BD, Blumenkranz MS, et al. Randomized controlled trial of an intravitreal dexamethasone drug delivery system in patients with diabetic macular edema. *Arch Ophthalmol* 2010;128:289-96.
  60. Campochiaro PA, Brown DM, Pearson A, et al. Sustained delivery fluocinolone acetonide vitreous inserts provide benefit for at least 3 Years in patients with diabetic macular edema. *Ophthalmology* 21-6-2012.
  61. Diabetic Retinopathy Clinical Research Network (DRCR.net), Beck RW, Edwards AR, et al. Three-year follow-up of a randomized trial comparing focal/grid photocoagulation and intravitreal triamcinolone for diabetic macular edema. *Arch Ophthalmol* 2009;127:245-51.
  62. Ockrim ZK, Sivaprasad S, Falk S, et al. Intravitreal triamcinolone versus laser photocoagulation for persistent diabetic macular oedema. *Br J Ophthalmol* 2008;92:795-9.
  63. Bressler NM, Edwards AR, Beck RW, et al. Exploratory analysis of diabetic retinopathy progression through 3 years in a randomized clinical trial that compares intravitreal triamcinolone acetonide with focal/grid photocoagulation. *Arch Ophthalmol* 2009;127:1566-71.
  64. Diabetic Retinopathy Clinical Research Network. A randomized trial comparing intravitreal triamcinolone acetonide and focal/grid photocoagulation for diabetic macular edema. *Ophthalmology* 2008;115:1447-9.
  65. Ford J, Elders A, Shyangdan D, et al. The relative clinical effectiveness of ranibizumab and bevacizumab in diabetic macular oedema: an indirect comparison. *BMJ* 2012;in press.
  66. Chakravarthy U, Harding SP, Rogers CA, et al. Ranibizumab versus bevacizumab to treat neovascular age-related macular degeneration: one-year findings from the IVAN randomized trial. *Ophthalmology* 2012;119:1399-411.
  67. Martin DF, Maguire MG, Fine SL, et al. Ranibizumab and bevacizumab for treatment of neovascular age-related macular degeneration: two-year results. *Ophthalmology* 2012;119:1388-98.
  68. Campbell RJ, Gill SS, Bronskill SE, et al. Adverse events with intravitreal injection of vascular endothelial growth factor inhibitors: nested case-control study. *BMJ* 2012;345:e4203.
  69. Van der Reis MI, La Heij EC, De Jong-Hesse Y, et al. A systematic review of the adverse events of intravitreal anti-vascular endothelial growth factor injections. *Retina-the Journal of Retinal and Vitreous Diseases* 2011;31:1449-69.



- 1  
2  
3  
4  
5  
6  
7 70. Fung AE, Rosenfeld PJ, Reichel E. The International Intravitreal Bevacizumab Safety Survey: using the internet to assess drug safety worldwide. *Br J Ophthalmol* 2006;90:1344-9.
- 8  
9  
10 71. Elbendary AM, Shahin MM. Intravitreal diclofenac versus intravitreal triamcinolone  
11 acetamide in the treatment of diabetic macular edema. *Retina* 2011;31:2058-64.
- 12  
13 72. Sfikakis PP, Grigoropoulos V, Emfietzoglou I, et al. Infliximab for diabetic macular edema  
14 refractory to laser photocoagulation: a randomized, double-blind, placebo-controlled,  
15 crossover, 32-week study. *Diabetes Care* 2010;33:1523-8.
- 16  
17 73. Keech AC, Mitchell P, Summanen PA, et al. Effect of fenofibrate on the need for laser  
18 treatment for diabetic retinopathy (FIELD study): a randomised controlled trial. *Lancet* 17-  
19 11-2007;370:1687-97.
- 20  
21 74. PKC-DMES Study Group. Effect of ruboxistaurin in patients with diabetic macular edema:  
22 thirty-month results of the randomized PKC-DMES clinical trial. *Arch Ophthalmol*  
23 2007;125:318-24.
- 24  
25 75. PKC-DMES Study Group. Effect of ruboxistaurin on visual loss in patients with diabetic  
26 retinopathy. *Ophthalmology* 2006;113:2221-30.
- 27  
28 76. Fong DS, Strauber SF, Aiello LP, et al. Comparison of the modified Early Treatment Diabetic  
29 Retinopathy Study and mild macular grid laser photocoagulation strategies for diabetic  
30 macular edema. *Arch Ophthalmol* 2007;125:469-80.
- 31  
32 77. Health Canada. Reports of eye inflammation, endophthalmitis, and Toxic Anterior Segment  
33 Syndrome (TASS) following off-label intravitreal use of Avastin (bevacizumab). 2008 [cited  
34 2012 Oct 24]; Available from: URL: [http://www.hc-sc.gc.ca/dhp-mps/medeff/advisories-  
35 avis/prof/2008/avastin\\_4\\_hpc-cps-eng.php](http://www.hc-sc.gc.ca/dhp-mps/medeff/advisories-avis/prof/2008/avastin_4_hpc-cps-eng.php)
- 36  
37 78. Curtis LH, Hammill BG, Schulman KA, et al. Risks of mortality, myocardial infarction,  
38 bleeding, and stroke associated with therapies for age-related macular degeneration. *Arch*  
39 *Ophthalmol* 2010;128:1273-9.
- 40  
41 79. Gower EW, Cassard S, Chu L, et al. Adverse event rates following intravitreal injection of  
42 Avastin or Lucentis for treating age-related macular degeneration [abstract]. *Invest*  
43 *Ophthalmol Vis Sci* 22-4-2011;52:E-Abstract 6644.
- 44  
45 80. General Medical Council. Prescribing medicines for use outside the terms of their licence  
46 (off-label). 2012 [cited 2012 Oct 24]; Available from: URL: [http://www.gmc-  
47 uk.org/guidance/ethical\\_guidance/prescriptions\\_fags.asp#10](http://www.gmc-uk.org/guidance/ethical_guidance/prescriptions_fags.asp#10)
- 48  
49 81. U.S. Food and Drug Administration. Off-Label" and investigational use of marketed drugs,  
50 biologics, and medical devices - Information Sheet. 2011 [cited 2012 Oct 24]; Available from:  
51 URL: <http://www.fda.gov/RegulatoryInformation/Guidances/ucm126486.htm>
- 52  
53 82. Alimera Sciences. Alimera Sciences' ILUVIEN® Receives Marketing Authorization in France for  
54 the Treatment of Chronic Diabetic Macular Edema. 2012 [cited 2012 Oct 24]; Available from:  
55 URL: <http://investor.alimerasciences.com/releasedetail.cfm?ReleaseID=692876>
- 56  
57 83. Laidlaw DA. Vitrectomy for diabetic macular oedema. *Eye* 2008;22:1337-41.
- 58  
59  
60

- 1  
2  
3  
4  
5  
6  
7  
8  
9  
10  
11  
12  
13  
14  
15  
16  
17  
18  
19  
20  
21  
22  
23  
24  
25  
26  
27  
28  
29  
30  
31  
32  
33  
34  
35  
36  
37  
38  
39  
40  
41  
42  
43  
44  
45  
46  
47  
48  
49  
50  
51  
52  
53  
54  
55  
56  
57  
58  
59  
60
84. National Institute for Health and Clinical Excellence. Ranibizumab for the treatment of diabetic macular oedema:TA237. 2011 [cited 2012 Oct 24];Available from: URL: <http://publications.nice.org.uk/ranibizumab-for-the-treatment-of-diabetic-macular-oedema-ta237>
  85. Rajendram R, Fraser-Bell S, Kaines A, et al. A 2-Year Prospective Randomized Controlled Trial of Intravitreal Bevacizumab or Laser Therapy (BOLT) in the Management of Diabetic Macular Edema: 24-Month Data: Report 3. *Arch Ophthalmol* 9-4-2012.
  86. Sivaprasad S, Dorin G. Subthreshold diode laser micropulse photocoagulation for the treatment of diabetic macular edema. *Expert Review of Medical Devices* 2012;9:189-97.
  87. Cho WB, Moon JW, Kim HC. Intravitreal triamcinolone and bevacizumab as adjunctive treatments to panretinal photocoagulation in diabetic retinopathy. *Br J Ophthalmol* 2010;94:858-63.
  88. Googe J, Brucker AJ, Bressler NM, et al. Randomized trial evaluating short-term effects of intravitreal ranibizumab or triamcinolone acetonide on macular edema after focal/grid laser for diabetic macular edema in eyes also receiving panretinal photocoagulation. *Retina* 2011;31:1009-27.
  89. Faghihi H, Roohipour R, Mohammadi SF, et al. Intravitreal bevacizumab versus combined bevacizumab-triamcinolone versus macular laser photocoagulation in diabetic macular edema. *Eur J Ophthalmol* 2008;18:941-8.
  90. Figueroa MS, Contreras I, Noval S. Surgical and anatomical outcomes of pars plana vitrectomy for diffuse nontractional diabetic macular edema. *Retina* 2008;28:420-6.
  91. Isaac DL, Abud MB, Frantz KA, et al. Comparing intravitreal triamcinolone acetonide and bevacizumab injections for the treatment of diabetic macular oedema: a randomized double-blind study. *Acta Ophthalmol* 2012;90:56-60.
  92. Paccola L, Costa RA, Folgosa MS, et al. Intravitreal triamcinolone versus bevacizumab for treatment of refractory diabetic macular oedema (IBEME study). *Br J Ophthalmol* 2008;92:76-80.
  93. Prager SG, Kriechbaum K, Mylonas G, et al. Comparison of intravitreally applied bevacizumab and triamcinolone on diabetic macular edema [abstract]. *Invest Ophthalmol Vis Sci* 11-4-2010;51:E-Abstract 4262.
  94. Ozturk BT, Kerimoglu H, Bozkurt B, et al. Comparison of intravitreal bevacizumab and ranibizumab treatment for diabetic macular edema. *J Ocul Pharmacol Ther* 2011;27:373-7.
  95. Marey HM, Ellakwa AF. Intravitreal bevacizumab alone or combined with triamcinolone acetonide as the primary treatment for diabetic macular edema. *Clin Ophthalmol* 2011;5:1011-6.
  96. Shahin MM, El-Lakkany RS. A prospective, randomized comparison of intravitreal triamcinolone acetonide versus intravitreal bevacizumab (avastin) in diffuse diabetic macular edema. *Middle East Afr J Ophthalmol* 2010;17:250-3.

- 1  
2  
3  
4  
5  
6  
7 97. Loftus JV, Sultan MB, Pleil AM, et al. Changes in vision- and health-related quality of life in  
8 patients with diabetic macular edema treated with pegaptanib sodium or sham.  
9 *Investigative Ophthalmology & Visual Science* 2011;52:7498-505.
- 10 98. Ferrone PJ, Jonisch J. Ranibizumab dose comparison for the treatment of diabetic macular  
11 edema [abstract]. *Invest Ophthalmol Vis Sci* 2011;52:E-Abstract 5333.
- 12 99. Solaiman KA, Diab MM, Abo-Elenin M. Intravitreal bevacizumab and/or macular  
13 photocoagulation as a primary treatment for diffuse diabetic macular edema. *Retina*  
14 2010;30:1638-45.
- 15 100. Diabetic Retinopathy Clinical Research Network, Scott IU, Edwards AR, et al. A phase II  
16 randomized clinical trial of intravitreal bevacizumab for diabetic macular edema.  
17 *Ophthalmology* 2007;114:1860-7.
- 18 101. Lee SJ, Kim ET, Moon YS. Intravitreal bevacizumab alone versus combined with macular  
19 photocoagulation in diabetic macular edema. *Korean J Ophthalmol* 2011;25:299-304.
- 20 102. Audren F, Lecleire-Collet A, Erginay A, et al. Intravitreal triamcinolone acetonide for diffuse  
21 diabetic macular edema: phase 2 trial comparing 4 mg vs 2 mg. *Am J Ophthalmol*  
22 2006;142:794-9.
- 23 103. Audren F, Erginay A, Haouchine B, et al. Intravitreal triamcinolone acetonide for diffuse  
24 diabetic macular oedema: 6-month results of a prospective controlled trial. *Acta Ophthalmol*  
25 *Scand* 2006;84:624-30.
- 26 104. Avitabile T, Longo A, Reibaldi A. Intravitreal triamcinolone compared with macular laser grid  
27 photocoagulation for the treatment of cystoid macular edema. *Am J Ophthalmol*  
28 2005;140:695-702.
- 29 105. Bandello F, Pognuz DR, Pirracchio A, et al. Intravitreal triamcinolone acetonide for florid  
30 proliferative diabetic retinopathy. *Graefes Arch Clin Exp Ophthalmol* 2004;42:1024-7.
- 31 106. Bonini MA, Jorge R, Barbosa JC, et al. Intravitreal injection versus sub-Tenon's infusion of  
32 triamcinolone acetonide for refractory diabetic macular edema: A randomized clinical trial.  
33 *Invest Ophthalmol Vis Sci* 2005;46:3845-9.
- 34 107. Cellini M, Pazzaglia A, Zamparini E, et al. Intravitreal vs. subtenon triamcinolone acetonide  
35 for the treatment of diabetic cystoid macular edema. *BMC Ophthalmol* 2008;8:5TN.
- 36 108. Cardillo JA, Melo LA, Jr., Costa RA, et al. Comparison of intravitreal versus posterior sub-  
37 Tenon's capsule injection of triamcinolone acetonide for diffuse diabetic macular edema.  
38 *Ophthalmology* 2005;112:1557-63.
- 39 109. Chung EJ, Freeman WR, Azen SP, et al. Comparison of combination posterior sub-tenon  
40 triamcinolone and modified grid laser treatment with intravitreal triamcinolone treatment in  
41 patients with diffuse diabetic macular edema. *Yonsei Medi J* 31-12-2008;49:955-64.
- 42 110. Dehghan MH, Ahmadi H, Ramezani A, et al. A randomized, placebo-controlled clinical trial  
43 of intravitreal triamcinolone for refractory diabetic macular edema. *Int Ophthalmol*  
44 2008;28:7-17.

111. Diabetic Retinopathy Clinical Research Network, Chew E, Strauber S, et al. Randomized trial of peribulbar triamcinolone acetonide with and without focal photocoagulation for mild diabetic macular edema: a pilot study. *Ophthalmology* 2007;114:1190-6.
112. Gil AL, Azevedo MJ, Tomasetto GG, et al. Treatment of diffuse diabetic maculopathy with intravitreal triamcinolone and laser photocoagulation: randomized clinical trial with morphological and functional evaluation. *Arquivos Brasileiros de Oftalmologia* 2011;74:343-7.
113. Entezari M, Ahmadi H, Dehghan MH, et al. Posterior sub-tenon triamcinolone for refractory diabetic macular edema: a randomized clinical trial. *Eur J Ophthalmol* 2005;15:746-50.
114. Hauser D, Bukelman A, Pokroy R, et al. Intravitreal triamcinolone for diabetic macular edema: comparison of 1, 2, and 4 mg. *Retina* 2008;28:825-30.
115. Jonas JB, Kampeter BA, Harder B, et al. Intravitreal triamcinolone acetonide for diabetic macular edema: A prospective, randomized study. *J Ocul Pharmacol Ther* 2006;22:200-7.
116. Jousseaume AM, Weiss C, Bauer D, et al. Triamcinolone versus inner-limiting membrane peeling in persistent diabetic macular edema (TIME study): design issues and implications. *Graefes Arch Clin Exp Ophthalmol* 2007;45:1781-7.
117. Kaderli B, Avci R. Comparison of topical and subconjunctival anesthesia in intravitreal injection administrations. *Eur J Ophthalmol* 2006;16:718-21.
118. Kang SW, Sa HS, Cho HY, et al. Macular grid photocoagulation after intravitreal triamcinolone acetonide for diffuse diabetic macular edema. *Arch Ophthalmol* 2006;124:653-8.
119. Kim JE, Pollack JS, Miller DG, et al. ISIS-DME: a prospective, randomized, dose-escalation intravitreal steroid injection study for refractory diabetic macular edema. *Retina* 2008;28:735-40.
120. Lam DS, Chan CK, Mohamed S, et al. A prospective randomised trial of different doses of intravitreal triamcinolone for diabetic macular oedema. *Br J Ophthalmol* 2007;91:199-203.
121. Lee HY, Lee SY, Park JS. Comparison of photocoagulation with combined intravitreal triamcinolone for diabetic macular edema. *Korean J Ophthalmol* 2009;23:153-8.
122. Maia OO, Jr., Takahashi BS, Costa RA, et al. Combined laser and intravitreal triamcinolone for proliferative diabetic retinopathy and macular edema: one-year results of a randomized clinical trial. *Am J Ophthalmol* 2009;147:291-7.
123. Massin P, Audren F, Haouchine B, et al. Intravitreal triamcinolone acetonide for diabetic diffuse macular edema: preliminary results of a prospective controlled trial. *Ophthalmology* 2004;111:218-24.
124. Mohamed S, Leung GM, Chan CK, et al. Factors associated with variability in response of diabetic macular oedema after intravitreal triamcinolone. *Clin Experiment Ophthalmol* 2009;37:602-8.

- 1  
2  
3  
4  
5  
6  
7 125. Nakamura A, Shimada Y, Horio N, et al. Vitrectomy for diabetic macular edema with  
8 posterior subtenon injection of triamcinolone acetonide. [Japanese]. *Folia Ophthalmol*  
9 *Japonica* 2004;55:958-62.
- 10 126. Spandau UH, Derse M, Schmitz-Valckenberg P, et al. Dosage dependency of intravitreal  
11 triamcinolone acetonide as treatment for diabetic macular oedema. *Br J Ophthalmol*  
12 2005;89:999-1003.
- 13 127. Tunc M, Onder HI, Kaya M. Posterior sub-Tenon's capsule triamcinolone injection combined  
14 with focal laser photocoagulation for diabetic macular edema. *Ophthalmology*  
15 2005;112:1086-91.
- 16 128. Verma LK, Vivek MB, Kumar A, et al. A prospective controlled trial to evaluate the adjunctive  
17 role of posterior subtenon triamcinolone in the treatment of diffuse diabetic macular  
18 edema. *J Ocul Pharmacol Ther* 2004;20:277-84.
- 19 129. Wickremasinghe SS, Rogers SL, Gillies MC, et al. Retinal vascular caliber changes after  
20 intravitreal triamcinolone treatment for diabetic macular edema. *Invest Ophthalmol Vis Sci*  
21 2008;49:4707-11.
- 22 130. Yalcinbayir O, Geliskan O, Kaderli B, et al. Intravitreal versus sub-Tenon posterior  
23 triamcinolone injection in bilateral diffuse diabetic macular edema. *Ophthalmologica*  
24 2011;225:222-7.
- 25 131. Haller JA, Bandello F, Belfort R, Jr., et al. Randomized, sham-controlled trial of  
26 dexamethasone intravitreal implant in patients with macular edema due to retinal vein  
27 occlusion. *Ophthalmology* 2010;117:1134-46.
- 28 132. Haller JA, Dugel P, Weinberg DV, et al. Evaluation of the safety and performance of an  
29 applicator for a novel intravitreal dexamethasone drug delivery system for the treatment of  
30 macular edema. *Retina* 2009;29:46-51.
- 31 133. Kuppermann BD, Blumenkranz MS, Haller JA, et al. Randomized controlled study of an  
32 intravitreal dexamethasone drug delivery system in patients with persistent macular  
33 edema. *Arch Ophthalmol* 2007;125:309-17.
- 34 134. Boyer DS, Faber D, Gupta S, et al. Dexamethasone intravitreal implant for treatment of  
35 diabetic macular edema in vitrectomized patients. *Retina* 2011;31:915-23.
- 36 135. Campochiaro PA, Hafiz G, Shah SM, et al. Sustained ocular delivery of fluocinolone acetonide  
37 by an intravitreal insert. *Ophthalmology* 2010;117:1393-9.
- 38 136. Gillies MC, Islam FM, Zhu M, et al. Efficacy and safety of multiple intravitreal triamcinolone  
39 injections for refractory diabetic macular oedema. *Br J Ophthalmol* 2007;91:1323-6.
- 40 137. Gillies MC, Simpson JM, Gaston C, et al. Five-year results of a randomized trial with open-  
41 label extension of triamcinolone acetonide for refractory diabetic macular edema.  
42 *Ophthalmology* 2009;116:2182-7.
- 43 138. Sutter FK, Simpson JM, Gillies MC. Intravitreal triamcinolone for diabetic macular edema  
44 that persists after laser treatment: three-month efficacy and safety results of a **prospective**,  
45 randomized, double-masked, placebo-controlled clinical trial. *Ophthalmology*  
46 2004;111:2044-9.

- 1  
2  
3  
4  
5  
6  
7 139. Brown DM, Nguyen QD, Rubio RG, et al. Ranibizumab for Diabetic Macular Edema (DME):  
8 24-Month Efficacy and Safety Results of RISE - a Phase 3 Randomized Controlled Trial  
9 [abstract]. *Invest Ophthalmol Vis Sci* 22-4-2011;52:E-Abstract 6647.
- 10 140. Boyer D, Sy J, Rundle AC, et al. Ranibizumab (Anti-VEGF) for vision loss due to diabetic  
11 macular edema - results of two phase III randomized trials [abstract]. *71st Scientific*  
12 *Sessions June 24 - 28, 2011, San Diego Convention Center - San Diego, California*  
13 2011;Abstract No, 133-LBOR.
- 14 141. Soheilian M, Ramezani A, Yaseri M, et al. Initial macular thickness and response to  
15 treatment in diabetic macular edema. *Retina* 2011;31:1564-73.
- 16  
17  
18  
19  
20  
21  
22  
23  
24  
25  
26  
27  
28  
29  
30  
31  
32  
33  
34  
35  
36  
37  
38  
39  
40  
41  
42  
43  
44  
45  
46  
47  
48  
49  
50  
51  
52  
53  
54  
55

1  
2  
3  
4  
5  
6  
7 **Appendix 1: Methods of the literature search**  
8

9 **Searches for clinical trials**

10  
11 *Ovid MEDLINE 1948-July week 2, 2012 and Ovid MEDLINE(R) In-Process & Other Non-Indexed*  
12 *Citations July 11, 2012*  
13

- 14 1. Diabetic Retinopathy/dt [Drug Therapy]
- 15 2. Macular Edema/dt [Drug Therapy]
- 16 3. (diabet\* adj2 macular adj (edema or oedema)).tw.
- 17 4. (diabet\* adj2 maculopathy).tw.
- 18 5. (diabet\* adj2 retinopathy).tw.
- 19 6. 1 or 2 or 3 or 4 or 5
- 20 7. (ranibizumab or lucentis or bevacizumab or avastin or pegaptanib or macugen or aflibercept or
- 21 vegf trap-eye or steroid\* or corticosteroid\* or dexamethasone or fluocinolone or triamcinolone or
- 22 anti-VEGF\* or anti-vascular endothelial growth factor\*).tw.
- 23 8. exp Vascular Endothelial Growth Factor A/
- 24 9. exp Fluocinolone Acetonide/
- 25 10. exp Triamcinolone/
- 26 11. 7 or 8 or 9 or 10
- 27 12. 6 and 11
- 28 13. randomized controlled trial.pt.
- 29 14. controlled clinical trial.pt.
- 30 15. (masked or sham or placebo or control group or random\*).tw.
- 31 16. 13 or 14 or 15
- 32 17. 12 and 16
- 33 18. (case reports or editorial or letter or review).pt.
- 34 19. 17 not 18
- 35 20. limit 19 to humans

36  
37  
38  
39  
40  
41  
42  
43 *Embase 1947 to 2012 Week 27*

- 44 1. (ranibizumab or lucentis or bevacizumab or avastin or pegaptanib or macugen or aflibercept or
  - 45 vegf trap-eye or dexamethasone or fluocinolone or triamcinolone or anti-VEGF\* or anti-vascular
  - 46 endothelial growth factor\*).m\_titl.
  - 47 2. (diabetic macular edema or diabetic macular oedema or diabetic retinopathy or diabetic
  - 48 maculopathy).m\_titl.
  - 49 3. 1 and 2
  - 50 4. random\*.tw.
  - 51 5. 3 and 4
  - 52 35
- 53  
54  
55  
56  
57  
58  
59  
60

1  
2  
3  
4  
5  
6  
7  
8  
9 *Cochrane Central Register of Controlled Trials, Issue 7 of 12, July 2012*

10 ranibizumab or lucentis or bevacizumab or avastin or pegaptanib or macugen or aflibercept or vegf  
11 trap-eye or steroid\* or corticosteroid\* or dexamethasone or fluocinolone or triamcinolone or anti-  
12 VEGF\* or anti-vascular endothelial growth factor\* in Record Title and diabetic macular edema or  
13 diabetic macular oedema or diabetic retinopathy or diabetic maculopathy in Record Title

14  
15 *Web of Science® – with Conference Proceedings (updated 2012-07-12)*

16  
17 Title=(ranibizumab or lucentis or bevacizumab or avastin or pegaptanib or macugen or aflibercept or  
18 vegf trap-eye or steroid\* or corticosteroid\* or dexamethasone or fluocinolone or triamcinolone or  
19 anti-VEGF\* or anti-vascular endothelial growth factor\*) AND Title=(diabetic macular edema or  
20 diabetic macular oedema or diabetic retinopathy or diabetic maculopathy) AND Title=(random\*)  
21

## 22 23 24 **Searches for systematic reviews**

25  
26 *Ovid MEDLINE(R) Daily Update July 11, 2012, Ovid MEDLINE(R) In-Process & Other Non-*  
27 *Indexed Citations July 11, 2012*

- 28 1. Diabetic Retinopathy/dt [Drug Therapy]
- 29 2. Macular Edema/dt [Drug Therapy]
- 30 3. (diabet\* adj2 macular adj (edema or oedema)).tw.
- 31 4. (diabet\* adj2 maculopathy).tw.
- 32 5. (diabet\* adj2 retinopathy).tw.
- 33 6. 1 or 2 or 3 or 4 or 5
- 34 7. (ranibizumab or lucentis or bevacizumab or avastin or pegaptanib or macugen or aflibercept or  
35 vegf trap-eye or steroid\* or corticosteroid\* or dexamethasone or fluocinolone or triamcinolone or  
36 anti-VEGF\* or anti-vascular endothelial growth factor\*).tw.
- 37 8. exp Vascular Endothelial Growth Factor A/  
38 9. exp Fluocinolone Acetonide/  
39 10. exp Triamcinolone/  
40 11. 7 or 8 or 9 or 10
- 41 12. 6 and 11
- 42 13. (systematic review or meta-analysis or pubmed or medline).tw.
- 43 14. meta-analysis.pt.
- 44 15. cochrane.af.
- 45 16. 13 or 14 or 15
- 46 17. 12 and 16

47  
48  
49  
50  
51  
52  
53  
54  
55  
56 36  
57  
58  
59  
60



1  
2  
3  
4  
5  
6  
7 *Cochrane Database of Systematic Reviews and Technology Assessments Database, Cochrane Library*  
8 *July Issue, 2012*

9  
10 "ranibizumab or lucentis or bevacizumab or avastin or pegaptanib or macugen or aflibercept or vegf  
11 trap-eye or steroid\* or corticosteroid\* or dexamethasone or fluocinolone or triamcinolone or anti-  
12 VEGF\* or anti-vascular endothelial growth factor\* in Record Title and diabetic macular edema or  
13 diabetic macular oedema or diabetic retinopathy or diabetic maculopathy in Record Title  
14

#### 15 16 **Searches for safety and adverse events**

17  
18 *Ovid MEDLINE(R) Daily Update July 11, 2012, Ovid MEDLINE(R) In-Process & Other Non-*  
19 *Indexed Citations July 11, 2012 ; Embase 1980to 2012 week 27*  
20

- 21 1. (ranibizumab or lucentis or bevacizumab or avastin or pegaptanib or aflibercept or vegf trap-eye  
22 or macugen or dexamethasone or fluocinolone or triamcinolone or anti-VEGF\* or anti-vascular  
23 endothelial growth factor\*).m\_titl.
  - 24 2. (diabetic macular edema or diabetic macular oedema or diabetic retinopathy or diabetic  
25 maculopathy).m\_titl.
  - 26 3. 1 and 2
  - 27 4. (risk or safety or adverse or harm or pharmacovigilance).tw.
  - 28 5. (side-effect\* or precaution\* or warning\* or contraindication\$ or contra-indication\* or tolerability  
29 or toxic\*).tw.
  - 30 6. 4 or 5
  - 31 7. 3 and 6
- 32  
33  
34  
35  
36

#### 37 **Searches of the annual meeting abstracts (for trials, reviews and safety studies)**

- 38 • ARVO (Association for Research in Vision and Ophthalmology) (2002 to 2012)
  - 39 • ADA (American Diabetes Association) (2002-2012)
  - 40 • EASD (European Association for the Study of Diabetes) (2002-2012)
- 41  
42  
43  
44

#### 45 **Other searches**

46 *Web sites of the following*

- 47
  - 48 • Drugs@FDA: FDA Approved Drug Products
  - 49 • European Medicines Association
  - 50 • ClinicalTrials.gov
  - 51 • EU Clinical Trials Register
- 52

53 National Institute for Health and Clinical Excellence  
54

55  
56 37  
57  
58  
59  
60

**Appendix 2: Ongoing Trials in ClinicalTrials.gov**

- Schmidt-Erfurth and colleagues are comparing ranibizumab and bevacizumab in DME (NCT00545870)
- TRIASTIN study is comparing ranibizumab, triamcinolone and sham injection (NCT00682539)
- Maturi and colleagues are comparing bevacizumab plus dexamethasone with bevacizumab alone (NCT01309451)
- lBeTA study (Jorge and colleagues) is comparing bevacizumab (1.5mg) plus laser, triamcinolone (4mg) plus laser with laser alone (NCT00997191)
- Chaudhry and colleagues are evaluating ranibizumab in patients who have failed with 3-6 injections of bevacizumab (NCT01253694)
- MIDME study (Pfizer) is comparing pegaptanib 0.3mg with sham injection. NCT01175070
- Figueira and colleagues are comparing pegaptanib plus laser with laser alone (NCT01281098)
- RESPOND (Novartis) is comparing ranibizumab (0.5mg) alone with ranibizumab plus laser or laser alone (NCT01135914)
- RETAIN (Novartis) study is comparing two different ranibizumab algorithms; “treat and extend” versus as needed (NCT01171976)
- RED-ES (Novartis) is comparing ranibizumab with laser in patients with visual impairment due to DME (NCT00901186)
- READ 3 study (Do and colleagues) are comparing two doses of ranibizumab 0.5 mg and 2 mg (NCT01077401)
- VIVID-DME and VISTA DME studies (Bayer) are comparing aflibercept with laser. (NCT01331681 and NCT01363440)
- Gillies and colleagues are comparing bevacizumab with dexamethasone (NCT01298076)
- Soheilian and colleagues are performing a phase I study looking at the use of diclofenac compared with bevacizumab in DME (NCT00999791)
- López-Miranda and colleagues are comparing the use of bevacizumab before and after laser therapy (NCT00804206)
- NEVANAC study is comparing triamcinolone alone with triamcinolone plus nepafenac (NSAID) (NCT00780780)
- Elman and colleagues are comparing laser alone, laser combined with an intravitreal injection of triamcinolone, laser combined with an intravitreal injection of ranibizumab, or intravitreal injection of ranibizumab alone (NCT00444600)
- BRDME (Schlingemann and colleagues) study is comparing the use of bevacizumab and ranibizumab in the treatment of patients with DME (OCT central area thickness > 275 µm) (NCT01635790)
- Wiley and colleagues are comparing bevacizumab and ranibizumab in patients with DME in at least one eye (NCT01610557)
- Protocol T study (Wells and colleagues) is comparing effectiveness of aflibercept, bevacizumab, and ranibizumab for DME (NCT01627249)
- Allergan funded study comparing safety and efficacy of 700 µg dexamethasone implant against 0.5 mg ranibizumab in patients with DME (NCT01492400)
- Pfizer funded study comparing effectiveness of 0.3 mg pegaptanib against sham injection (NCT01100307)

1  
2  
3  
4  
5  
6  
7  
8  
9  
10  
11  
12  
13  
14  
15  
16  
17  
18  
19  
20  
21  
22  
23  
24  
25  
26  
27  
28  
29  
30  
31  
32  
33  
34  
35  
36  
37  
38  
39  
40  
41  
42  
43  
44  
45  
46  
47  
48  
49  
50  
51  
52  
53  
54  
55  
56  
57  
58  
59  
60

- Allergan funded study comparing safety and efficacy of an intravitreal dexamethasone implant (700 µg and 350 µg) against sham in patients with DME (NCT00168389)
- Allergan funded study comparing safety and efficacy of an intravitreal dexamethasone implant (700 µg and 350 µg) against sham in patients with DME (NCT00168337)

For peer review only

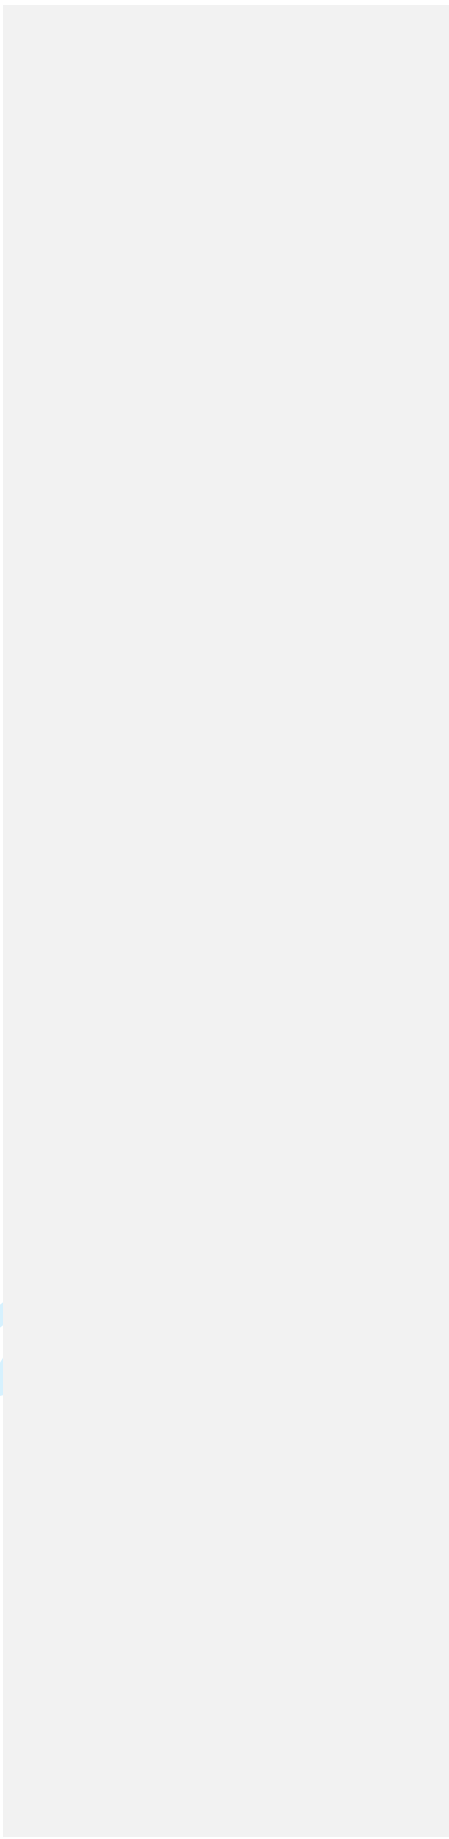

Figure 1 - PRISMA

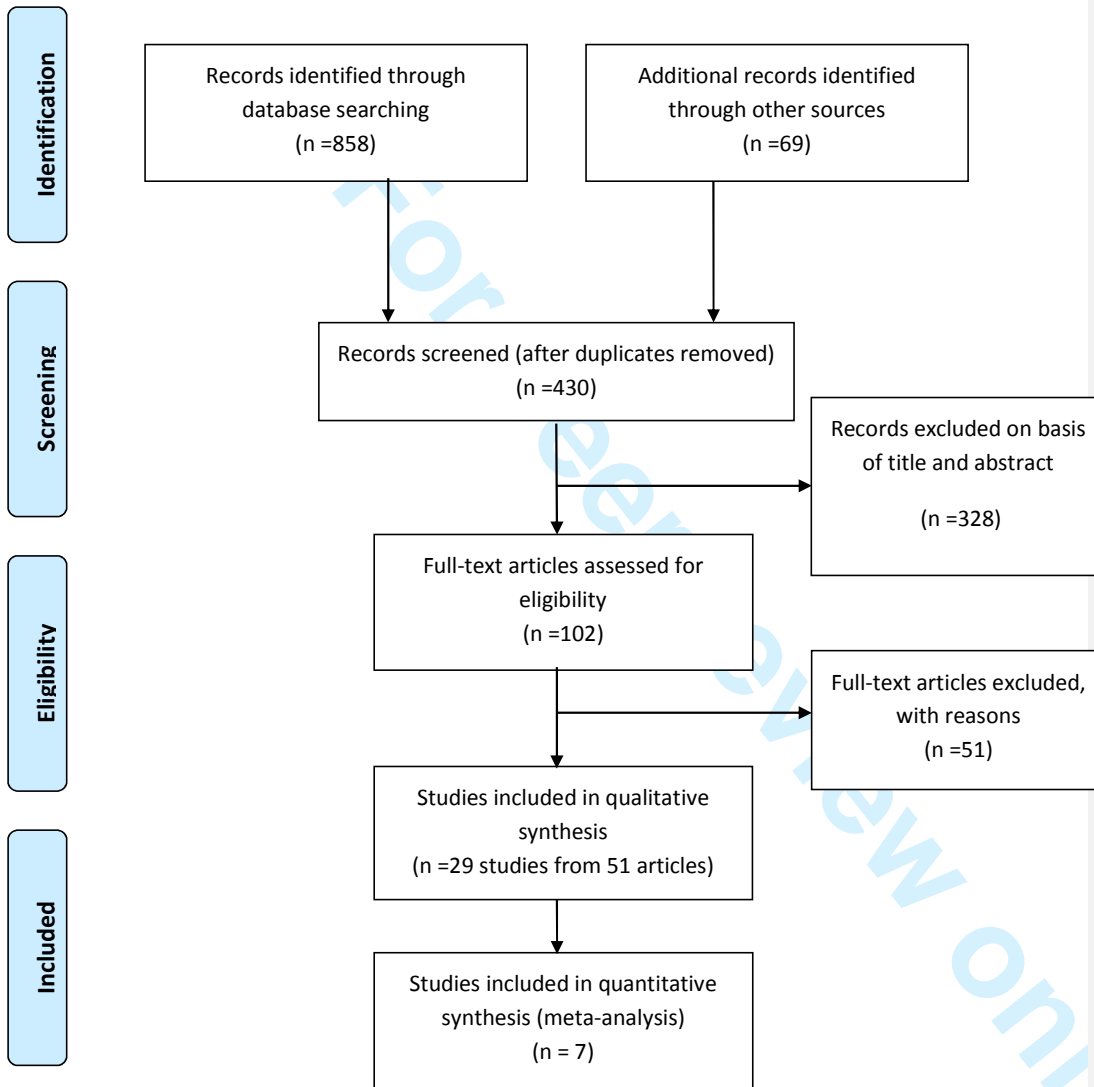

**Figure 2 Ranibizumab 0.5mg alone versus laser alone****2.1 Mean change in BCVA**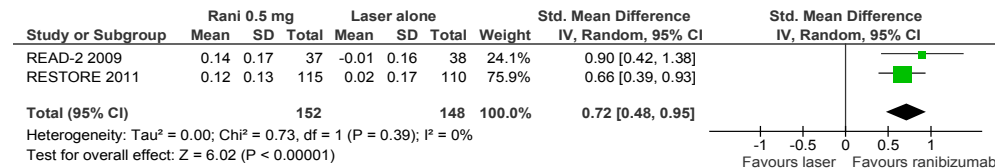**2.2 Proportion with >15 letter gain**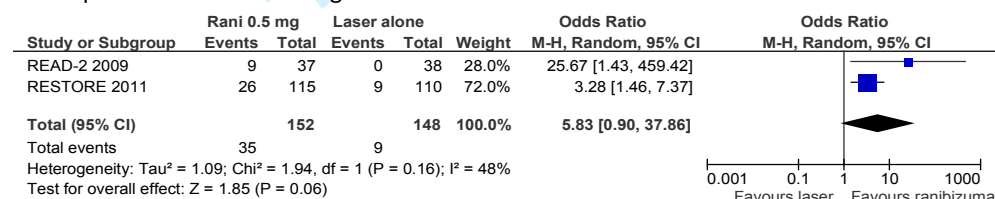**2.3 CMT**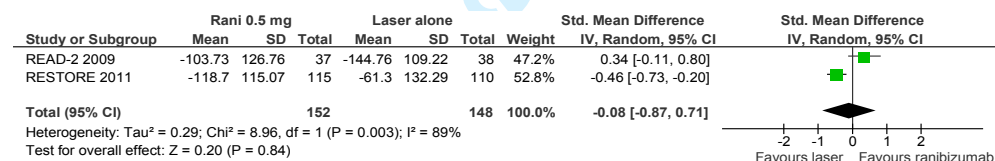**Figure 3 Ranibizumab 0.5mg plus laser versus ranibizumab 0.5mg alone****3.1 Mean change in BCVA**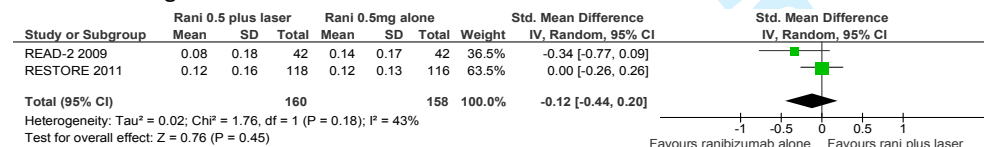**3.2 Proportion with >15 letter gain**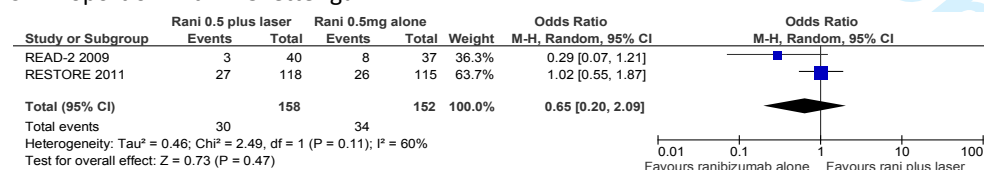

3.3 CMT

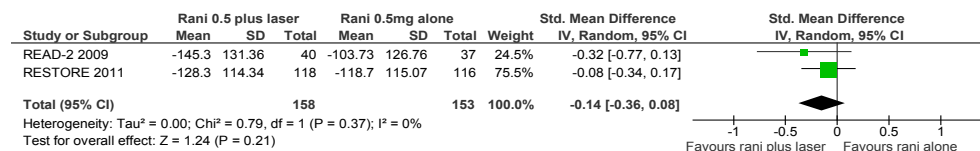

Figure 4 Ranibizumab 0.5mg plus laser versus laser alone

4.1 Mean change in BCVA

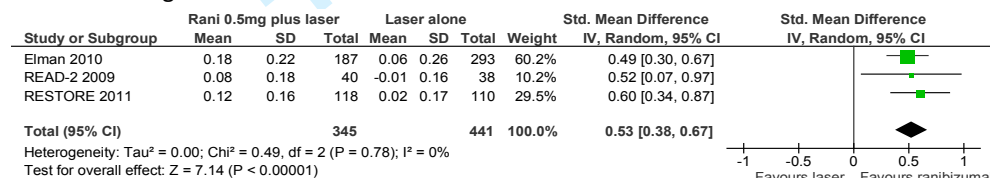

4.2 Proportion with >15 letter gain

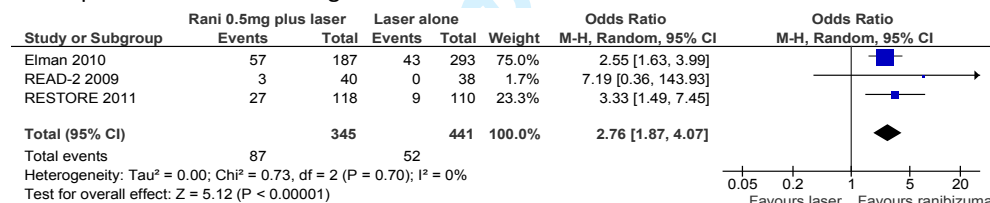

4.3 CMT

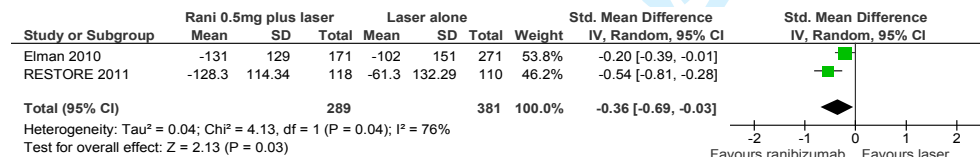

Figure 5 Pegaptanib 0.3mg versus sham injection

5.1 Proportion with >15 letter gain

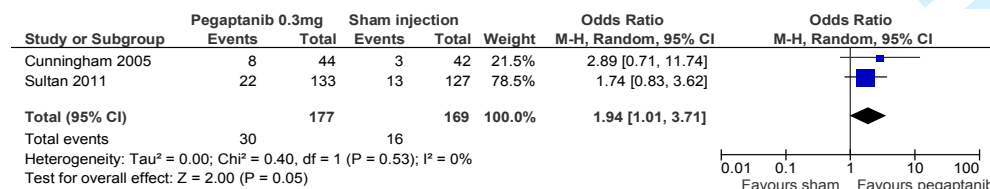

Figure 6 Triamcinolone 4mg versus laser alone

6.1 Mean change in BCVA

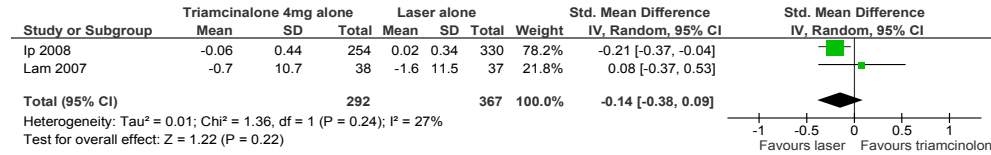

6.2 Proportion with >15 letter gain

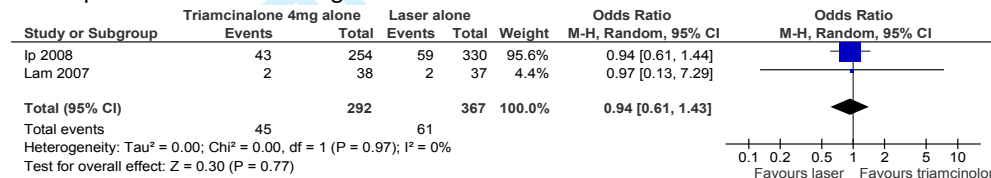

Figure 7 Triamcinolone 4mg plus laser versus laser alone

7.1 Mean change in BCVA

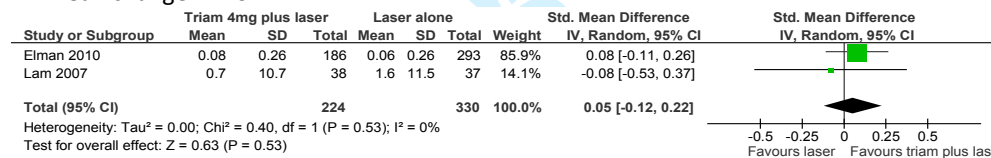

7.2 Proportion with >15 letter gain

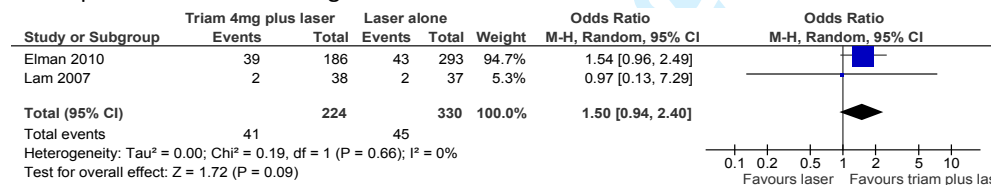

Table 1: List of excluded studies

| Study                           | Reason                          |
|---------------------------------|---------------------------------|
| <b>Active comparator trials</b> |                                 |
| Cho 2010[87]                    | Single dose                     |
| DRCRN 2010 (Googe 2010)[88]     | <6 mths f/u                     |
| Faghihi 2008[89]                | Single dose                     |
| Figueroa 2008[90]               | Single dose                     |
| Isaac 2012[91]                  | Single dose                     |
| Paccola 2008[92]                | Single dose                     |
| Prager 2011[93]                 | <25 pts per arm                 |
| Ozturk 2011[94]                 | Non-RCT                         |
| Marey 2011[95]                  | <6 mths                         |
| Shahin 2010[96]                 | Single dose                     |
| <b>Pegaptanib</b>               |                                 |
| Loftus 2011[97]                 | Quality of life data.           |
| <b>Ranibizumab</b>              |                                 |
| Ferrone 2011[98]                | <25 pts per arm                 |
| <b>Bevacizumab</b>              |                                 |
| Solaiman 2010[99]               | Single dose                     |
| DRCRN –Scott 2007[100]          | <25 pts per arm                 |
| Lee 2011[101]                   | Non-RCT                         |
| Isaac 2012[91]                  | Single dose                     |
| <b>Trimacinolone</b>            |                                 |
| Audren 2006a[102]               | Single dose (dosing study)      |
| Audren 2006b[103]               | Single dose                     |
| Avitabile 2005[104]             | Mixed RVO and DMO               |
| Bandello 2004[105]              | Case report + PDR               |
| Bonini 2005[106]                | Single dose injection technique |
| Cellini 2008[107]               | Single injection PSTI           |
| Cardillo 2005[108]              | Single injection PSTI           |
| Chung 2008[109]                 | Single injection PSTI           |
| Dehghan 2008[110]               | Single dose                     |
| DRCRN -Chew 2007[111]           | <25 pts per arm                 |
| Gil 2011[112]                   | <25 pts per arm                 |
| Entezari 2005[113]              | <6 months                       |
| Hauser 2008[114]                | Single dose                     |
| Jonas 2006[115]                 | Single dose                     |
| Joussen 2007[116]               | Study protocol                  |
| Avci 2006[117]                  | Anaesthetic technique           |
| Kang 2006[118]                  | Single dose                     |
| Kim 2008[119]                   | Single injection and CME        |
| Lam 2007b[120]                  | Single injection                |
| Lee 2009[121]                   | Single injection                |
| Maia 2009[122]                  | Single dose                     |
| Massin 2004[123]                | Single dose                     |
| Mohamed 2009[124]               | Post-hoc analysis               |
| Nakamura 2004[125]              | Single dose                     |
| Spandau 2005[126]               | Single dose                     |
| Tunc 2005[127]                  | <6 months                       |



|                          |                                  |
|--------------------------|----------------------------------|
| Verma 2004[128]          | Single dose                      |
| Wickremasinghe 2008[129] | Single dose                      |
| Yalcinbayir 2011[130]    | Single dose                      |
| <b>Dexamethasone</b>     |                                  |
| Haller 2010[131]         | <6 months                        |
| Haller 2009[132]         | <25pts per arm                   |
| Kuppermann 2007 [133]    | Mixture of macular oedema causes |
| Boyer 2011[134]          | Non-randomised                   |
| <b>Fluocinolone</b>      |                                  |
| Camposchiaro 2010[135]   | <25pts per arm                   |
| <b>Diclofenac</b>        |                                  |
| Elbendary 2011 [71]      | <35pts per arm                   |

**Table 246: Study quality**

| <u>Study (author and year)</u>              | <u>Adequate sequence generation</u> | <u>Allocation concealment</u> | <u>Masking</u>                                                                   | <u>Incomplete outcome data addressed</u>                                              | <u>Free of selective reporting</u> | <u>Free of other bias (e.g. similarity at baseline, power assessment)</u>                                                                                                       | <u>Funder</u>                                                              |
|---------------------------------------------|-------------------------------------|-------------------------------|----------------------------------------------------------------------------------|---------------------------------------------------------------------------------------|------------------------------------|---------------------------------------------------------------------------------------------------------------------------------------------------------------------------------|----------------------------------------------------------------------------|
| <b>Anti-VEGFs</b>                           |                                     |                               |                                                                                  |                                                                                       |                                    |                                                                                                                                                                                 |                                                                            |
| <b>Ranibizumab</b>                          |                                     |                               |                                                                                  |                                                                                       |                                    |                                                                                                                                                                                 |                                                                            |
| <u>READ-2 Study [28,47]</u>                 | <u>Unclear</u>                      | <u>Unclear</u>                | <u>Unclear</u>                                                                   | <u>Yes (91.3% completion)</u>                                                         | <u>Yes</u>                         | <u>Comparison groups similar at baseline; power analysis not mentioned</u>                                                                                                      | <u>Juvenile Diabetes Research Foundation, Genentech Inc.</u>               |
| <u>RESOLVE Study (Massin 2010)[36]</u>      | <u>Yes</u>                          | <u>Yes</u>                    | <u>Yes (patients and outcome assessors)</u>                                      | <u>Yes (82% completion in sham arm, 90.2% with ranibizumab)</u>                       | <u>Yes</u>                         | <u>Comparison groups similar at baseline; power analysis unclear</u>                                                                                                            | <u>Novartis Pharma, Switzerland</u>                                        |
| <u>RESTORE Study (Mitchell 2011)[24]</u>    | <u>Yes</u>                          | <u>Unclear</u>                | <u>Yes (patients, outcome assessors)</u>                                         | <u>Yes (87.3 to 88.3% completion)</u>                                                 | <u>Yes</u>                         | <u>Comparison groups similar at baseline; power analysis carried out (power adequate for VA changes)</u>                                                                        | <u>Novartis Pharma, Switzerland</u>                                        |
| <u>RISE and RIDE (Nguyen 2012)[38]</u>      | <u>Yes</u>                          | <u>Yes</u>                    | <u>Yes (patients, treating physician masked to assigned dose of ranibizumab)</u> | <u>Yes (2 year study completed by 83.3% of patients in RISE and by 84.6% in RIDE)</u> | <u>Yes</u>                         | <u>Comparison groups similar at baseline; ITT analysis; power analysis carried out (power adequate for primary endpoint)</u>                                                    | <u>Genentech Inc.</u>                                                      |
| <b>Bevacizumab</b>                          |                                     |                               |                                                                                  |                                                                                       |                                    |                                                                                                                                                                                 |                                                                            |
| <u>BOLT Study (Michaelides 2010)[23,52]</u> | <u>Yes</u>                          | <u>Unclear</u>                | <u>Partial (outcome assessors, not patients)</u>                                 | <u>Yes (97.5% completion)</u>                                                         | <u>Yes</u>                         | <u>Comparison groups similar at baseline (except laser group had longer duration of clinically significant DMO); power analysis carried out (power adequate for VA changes)</u> | <u>Moorfields Special Trustees, National Institute for Health Research</u> |
| <u>Faghihi 2010[53]</u>                     | <u>Yes</u>                          | <u>Unclear</u>                | <u>Yes (patient)</u>                                                             | <u>Yes (100% completion)</u>                                                          | <u>Yes</u>                         | <u>Comparable groups at baseline</u>                                                                                                                                            | <u>Not specified</u>                                                       |

| <u>Study (author and year)</u>                        | <u>Adequate sequence generation</u>                          | <u>Allocation concealment</u> | <u>Masking</u>                                                                  | <u>Incomplete outcome data addressed</u>          | <u>Free of selective reporting</u> | <u>Free of other bias (e.g. similarity at baseline, power assessment)</u>                                                                   | <u>Funder</u>                                                                                   |
|-------------------------------------------------------|--------------------------------------------------------------|-------------------------------|---------------------------------------------------------------------------------|---------------------------------------------------|------------------------------------|---------------------------------------------------------------------------------------------------------------------------------------------|-------------------------------------------------------------------------------------------------|
| <a href="#">Lam 2009</a> [35]                         | <a href="#">Yes</a>                                          | <a href="#">Yes</a>           | <a href="#">Yes (patients and technicians assessing BCVA, OCT and IOP)</a>      | <a href="#">Yes (92.3% follow-up at 6 months)</a> | <a href="#">Yes</a>                | <a href="#">Comparison groups similar at baseline; power analysis carried out (power adequate for CMT changes)</a>                          | <a href="#">supported in part by the Action for Vision Eye Foundation Hong Kong (charity)</a>   |
| <b><u>Pegaptanib</u></b>                              |                                                              |                               |                                                                                 |                                                   |                                    |                                                                                                                                             |                                                                                                 |
| <a href="#">Cunningham 2005 / Adamis 2006</a> [39,57] | <a href="#">Yes</a>                                          | <a href="#">Unclear</a>       | <a href="#">Yes (patients and outcome assessors)</a>                            | <a href="#">Yes (95% completion)</a>              | <a href="#">Yes</a>                | <a href="#">Comparison groups similar at baseline; acknowledge lack of power to detect differences between doses of pegaptanib</a>          | <a href="#">Eyetech Pharmaceuticals Inc., New York, and Pfizer Inc., New York</a>               |
| <a href="#">Sultan 2011</a> [40]                      | <a href="#">Yes</a>                                          | <a href="#">Unclear</a>       | <a href="#">Yes (patients and outcome assessors)</a>                            | <a href="#">Yes (69.9 to 73.8% completion)</a>    | <a href="#">Yes</a>                | <a href="#">Comparison groups similar at baseline; power analysis carried out (power adequate for VA changes)</a>                           | <a href="#">Pfizer Inc., New York</a>                                                           |
| <b><u>Aflibercept</u></b>                             |                                                              |                               |                                                                                 |                                                   |                                    |                                                                                                                                             |                                                                                                 |
| <a href="#">Da Vinci 2010</a> [30,58]                 | <a href="#">Unclear (predetermined randomization scheme)</a> | <a href="#">Unclear</a>       | <a href="#">Yes (patients)</a>                                                  | <a href="#">Yes (85% completion)</a>              | <a href="#">Yes</a>                | <a href="#">Comparison groups similar at baseline; power calculation completed</a>                                                          | <a href="#">Regeneron Pharmaceuticals, Inc., New York</a>                                       |
| <b><u>Steroids</u></b>                                |                                                              |                               |                                                                                 |                                                   |                                    |                                                                                                                                             |                                                                                                 |
| <b><u>Dexamethasone</u></b>                           |                                                              |                               |                                                                                 |                                                   |                                    |                                                                                                                                             |                                                                                                 |
| <a href="#">Haller 2010</a> [59]                      | <a href="#">Yes</a>                                          | <a href="#">Unclear</a>       | <a href="#">Yes (patients to dexamethasone dose, outcome assessors)</a>         | <a href="#">Yes (92% completion)</a>              | <a href="#">Yes</a>                | <a href="#">Comparison groups similar at baseline; power analysis carried out, but study not powered to detect differences in subgroups</a> | <a href="#">Oculex Pharmaceuticals Inc.</a>                                                     |
| <b><u>Fluocinolone</u></b>                            |                                                              |                               |                                                                                 |                                                   |                                    |                                                                                                                                             |                                                                                                 |
| <a href="#">FAME Study (Campochiaro 2011)</a> [29,60] | <a href="#">Unclear</a>                                      | <a href="#">Unclear</a>       | <a href="#">Partial (patients, masking of outcome assessment not mentioned)</a> | <a href="#">Yes (drop-out rate 19.0 to 22.7%)</a> | <a href="#">Yes</a>                | <a href="#">Comparison groups similar at baseline; power analysis not mentioned</a>                                                         | <a href="#">Alimera Sciences Inc., Atlanta, Georgia; Psivida Inc., Watertown, Massachusetts</a> |

| <u>Study (author and year)</u>                       | <u>Adequate sequence generation</u> | <u>Allocation concealment</u> | <u>Masking</u>                                                                                                                       | <u>Incomplete outcome data addressed</u>       | <u>Free of selective reporting</u> | <u>Free of other bias (e.g. similarity at baseline, power assessment)</u>                                                        | <u>Funder</u>                                                                                                                                                                                   |
|------------------------------------------------------|-------------------------------------|-------------------------------|--------------------------------------------------------------------------------------------------------------------------------------|------------------------------------------------|------------------------------------|----------------------------------------------------------------------------------------------------------------------------------|-------------------------------------------------------------------------------------------------------------------------------------------------------------------------------------------------|
| Pearson 2011[43]                                     | Yes                                 | Unclear                       | Third party masked design (patient and investigator not masked)                                                                      | No losses to follow-up                         | Yes                                | Demographic characteristics were similar between implant and SOC groups; power calculation done, study adequately powered.       | Bausch & Lomb Inc, Rochester, New York                                                                                                                                                          |
| <b><u>Triamcinolone</u></b>                          |                                     |                               |                                                                                                                                      |                                                |                                    |                                                                                                                                  |                                                                                                                                                                                                 |
| DRCR Network 2008 [22,61,63,64]                      | Yes                                 | Unclear                       | Partial (patients to triamcinolone dose, outcome assessors not formally masked but generally not aware of participant's study group) | Yes (81 to 86% completion)                     | Yes                                | Comparison groups similar at baseline; power analysis carried out (power adequate for VA changes)                                | Cooperative agreement from the National Eye Institute, National Institute of Diabetes and Digestive and Kidney Diseases, National Institutes of Health, Department of Health and Human Services |
| Gillies 2006 / 2007 / 2009 / Sutter 2004[32,136-138] | Yes                                 | Yes                           | Yes (patients, outcome assessors)                                                                                                    | Yes (91% completion intervention, 83% control) | Yes                                | Comparison groups similar at baseline (but limited demographic data); power analysis carried out (power adequate for VA changes) | Sydney Eye Hospital Foundation and Juvenile Diabetes Research Foundation, New York                                                                                                              |
| Gillies 2011[33]                                     | Yes                                 | Yes                           | Yes (patients, outcome assessors)                                                                                                    | Yes (84.5% completion)                         | Yes                                | power analysis carried out (power adequate for VA changes)                                                                       | National Health and Medical Research Council, Canberra, Australia, and the Sydney Eye Hospital Foundation, Sydney, Australia                                                                    |
| Lam 2007[34]                                         | Yes                                 | Yes                           | Partial (outcome assessors)                                                                                                          | No losses to follow-up                         | Yes                                | Comparison groups similar at baseline; power analysis carried out (power adequate for CMT changes)                               | Action for Vision Foundation, Hong Kong                                                                                                                                                         |
| Ockrim 2008/Sviprasad 2008[42,62]                    | Yes                                 | Unclear                       | Unclear                                                                                                                              | Yes (94% completion)                           | Yes                                | Comparison groups similar at baseline; power analysis carried out (power adequate for VA changes)                                | Special Trustees of Moorfields Eye Hospital                                                                                                                                                     |
| <b><u>Active comparator trials</u></b>               |                                     |                               |                                                                                                                                      |                                                |                                    |                                                                                                                                  |                                                                                                                                                                                                 |

| <u>Study (author and year)</u> | <u>Adequate sequence generation</u> | <u>Allocation concealment</u> | <u>Masking</u>                                                                                                   | <u>Incomplete outcome data addressed</u>          | <u>Free of selective reporting</u> | <u>Free of other bias (e.g. similarity at baseline, power assessment)</u>                                                                                                      | <u>Funder</u>                                                                                                                                                                                                                                                                                                                         |
|--------------------------------|-------------------------------------|-------------------------------|------------------------------------------------------------------------------------------------------------------|---------------------------------------------------|------------------------------------|--------------------------------------------------------------------------------------------------------------------------------------------------------------------------------|---------------------------------------------------------------------------------------------------------------------------------------------------------------------------------------------------------------------------------------------------------------------------------------------------------------------------------------|
| <u>Ahmadiieh 2008</u> [31]     | <u>Yes</u>                          | <u>Yes</u>                    | <u>Yes (patients and outcome assessors)</u>                                                                      | <u>Unclear</u>                                    | <u>Yes</u>                         | <u>CMT lower in control group at baseline (p&lt;0.05), other baseline values similar; power analysis carried out (power adequate for CMT changes)</u>                          | <u>Not reported</u>                                                                                                                                                                                                                                                                                                                   |
| <u>DRCR Network</u> [21,46]    | <u>Yes</u>                          | <u>Unclear</u>                | <u>Yes (patients, except deferred laser group; outcome assessors); masking discontinued after the first year</u> | <u>Yes (1 year completion for 91-95% of eyes)</u> | <u>Yes</u>                         | <u>Comparison groups similar at baseline; power analysis carried out (power adequate for VA changes)</u>                                                                       | <u>Cooperative agreement from the National Eye Institute, National Institute of Diabetes and Digestive and Kidney Diseases, National Institutes of Health and Human Services; Ranibizumab provided by Genentech, triamcinolone provided by Allergan Inc.; companies also provided funds to defray the study's clinical site costs</u> |
| <u>Lim 2012</u> [55]           | <u>Yes</u>                          | <u>Unclear</u>                | <u>Yes (investigators only)</u>                                                                                  | <u>Yes (7.5% drop out after enrollment)</u>       | <u>Yes</u>                         | <u>Groups similar at baseline. The bevacizumab group received more injections.</u>                                                                                             | <u>Not reported</u>                                                                                                                                                                                                                                                                                                                   |
| <u>Soheilian</u> [37,41]       | <u>Yes</u>                          | <u>Yes</u>                    | <u>Yes (patients and outcome assessors)</u>                                                                      | <u>Unclear (36 week completion for 76 to 88%)</u> | <u>Yes</u>                         | <u>CMT significantly lower and VA significantly better in MPC group at baseline, other baseline values similar; power analysis carried out (power adequate for VA changes)</u> | <u>Ophthalmic Research Centre, Labbafinejad Medical Center, Tehran</u>                                                                                                                                                                                                                                                                |

Table 23: Ranibizumab trials

| Study                                                                                                                                                                                                                                                                        | Participants and baseline values                                                                                                                                                                                                                                                                                                                                                                                                                                                                                                                                                                                                                                                                                                                                             | Intervention                                                                                                                                                                                                                                                                                                                                                                                                                                                                                                                                                                                                        | Outcome (change from baseline at study end)                                                                                                                                                                                                                                                                                                                                                                                                                                                                                                                                                                                                                                                                                                                                                                                                                                                                                                                                |  |                        |   |        |       |             |        |       |    |      |               |                |        |            |            |        |            |    |      |    |  |  |          |   |     |        |                                                                                          |   |       |  |      |        |  |
|------------------------------------------------------------------------------------------------------------------------------------------------------------------------------------------------------------------------------------------------------------------------------|------------------------------------------------------------------------------------------------------------------------------------------------------------------------------------------------------------------------------------------------------------------------------------------------------------------------------------------------------------------------------------------------------------------------------------------------------------------------------------------------------------------------------------------------------------------------------------------------------------------------------------------------------------------------------------------------------------------------------------------------------------------------------|---------------------------------------------------------------------------------------------------------------------------------------------------------------------------------------------------------------------------------------------------------------------------------------------------------------------------------------------------------------------------------------------------------------------------------------------------------------------------------------------------------------------------------------------------------------------------------------------------------------------|----------------------------------------------------------------------------------------------------------------------------------------------------------------------------------------------------------------------------------------------------------------------------------------------------------------------------------------------------------------------------------------------------------------------------------------------------------------------------------------------------------------------------------------------------------------------------------------------------------------------------------------------------------------------------------------------------------------------------------------------------------------------------------------------------------------------------------------------------------------------------------------------------------------------------------------------------------------------------|--|------------------------|---|--------|-------|-------------|--------|-------|----|------|---------------|----------------|--------|------------|------------|--------|------------|----|------|----|--|--|----------|---|-----|--------|------------------------------------------------------------------------------------------|---|-------|--|------|--------|--|
| <p><b>READ-2 Study (Nguyen 2009 / Nguyen 2010)</b>[28,47]<br/>USA<br/>Multicenter</p> <p><b>Design:</b> 3-arm RCT<br/><b>Follow-up:</b> 6 months, 2 year extension [no relevant outcomes as IVR received by all groups by that time, no safety outcomes for 2 year data]</p> | <p>N: 126 eyes of 126 patients<br/><b>Inclusion criteria:</b> ≥18 years, type 1 or 2 DM, DMO, BCVA 20/40 to 20/320, CMT ≥250 µm, HbA1c ≥6% within 12 months before randomization; expectation that scatter laser photocoagulation not required for 6 months<br/><b>Exclusion criteria:</b> contributing causes to reduced BCVA other than DMO, focal/grid laser within 3 months, intraocular steroid within 3 months, intraocular VEGF antagonist within 2 months<br/><b>Age:</b> 62 years<br/><b>Sex:</b> 52 to 69% female<br/><b>Diabetes type:</b> not reported<br/><b>HbA1c:</b> 7.39 to 7.77%<br/><b>Baseline VA:</b> ETDRS letter score 24.85 to 28.35<br/><b>Baseline CMT:</b> excess foveal thickness 198.75 to 262.52 µm<br/><b>Comorbidities:</b> not reported</p> | <p><b>Group 1 (IVR, n=42 eyes):</b> IV injections of 0.5 mg ranibizumab at baseline, 1, 3, and 5 months<br/><b>Group 2 (L, n=42 eyes):</b> focal/grid laser at baseline and 3 months if CMT ≥250 µm<br/><b>Group 3 (IVRL, n=42 eyes):</b> IV injections of 0.5 mg ranibizumab at baseline and 3 months, followed by focal/grid laser treatment 1 week later<br/><b>Regimen for all groups:</b> after 6 months, patients could receive IV injections of ranibizumab no more than every 2 months or focal/grid laser no more than every 3 months if CMT ≥250 µm<br/><b>Laser Modified ETDRS protocol</b> was used</p> | <p><b>At 6 months</b><br/><b>BCVA (ETDRS):</b></p> <table border="1"> <thead> <tr> <th></th> <th>BCVA (letters)</th> <th>p</th> </tr> </thead> <tbody> <tr> <td>IVR</td> <td>+7.24</td> <td>0.0003 vs L</td> </tr> <tr> <td>L</td> <td>-0.43</td> <td></td> </tr> <tr> <td>IVRL</td> <td>+3.80</td> <td>NS vs IVR or L</td> </tr> </tbody> </table> <p><b>plus ≥3 lines</b></p> <table border="1"> <tbody> <tr> <td>IVR</td> <td>22%</td> <td>&lt;0.05 vs L</td> </tr> <tr> <td>L</td> <td>0</td> <td></td> </tr> <tr> <td>IVRL</td> <td>8%</td> <td></td> </tr> </tbody> </table> <p><b>CMT (OCT):</b></p> <table border="1"> <thead> <tr> <th></th> <th>CMT (µm)</th> <th>p</th> </tr> </thead> <tbody> <tr> <td>IVR</td> <td>-106.3</td> <td>all &lt;0.01 vs baseline, NS for elimination of ≥50% excess foveal thickness between groups</td> </tr> <tr> <td>L</td> <td>-82.8</td> <td></td> </tr> <tr> <td>IVRL</td> <td>-117.2</td> <td></td> </tr> </tbody> </table> |  | BCVA (letters)         | p | IVR    | +7.24 | 0.0003 vs L | L      | -0.43 |    | IVRL | +3.80         | NS vs IVR or L | IVR    | 22%        | <0.05 vs L | L      | 0          |    | IVRL | 8% |  |  | CMT (µm) | p | IVR | -106.3 | all <0.01 vs baseline, NS for elimination of ≥50% excess foveal thickness between groups | L | -82.8 |  | IVRL | -117.2 |  |
|                                                                                                                                                                                                                                                                              | BCVA (letters)                                                                                                                                                                                                                                                                                                                                                                                                                                                                                                                                                                                                                                                                                                                                                               | p                                                                                                                                                                                                                                                                                                                                                                                                                                                                                                                                                                                                                   |                                                                                                                                                                                                                                                                                                                                                                                                                                                                                                                                                                                                                                                                                                                                                                                                                                                                                                                                                                            |  |                        |   |        |       |             |        |       |    |      |               |                |        |            |            |        |            |    |      |    |  |  |          |   |     |        |                                                                                          |   |       |  |      |        |  |
| IVR                                                                                                                                                                                                                                                                          | +7.24                                                                                                                                                                                                                                                                                                                                                                                                                                                                                                                                                                                                                                                                                                                                                                        | 0.0003 vs L                                                                                                                                                                                                                                                                                                                                                                                                                                                                                                                                                                                                         |                                                                                                                                                                                                                                                                                                                                                                                                                                                                                                                                                                                                                                                                                                                                                                                                                                                                                                                                                                            |  |                        |   |        |       |             |        |       |    |      |               |                |        |            |            |        |            |    |      |    |  |  |          |   |     |        |                                                                                          |   |       |  |      |        |  |
| L                                                                                                                                                                                                                                                                            | -0.43                                                                                                                                                                                                                                                                                                                                                                                                                                                                                                                                                                                                                                                                                                                                                                        |                                                                                                                                                                                                                                                                                                                                                                                                                                                                                                                                                                                                                     |                                                                                                                                                                                                                                                                                                                                                                                                                                                                                                                                                                                                                                                                                                                                                                                                                                                                                                                                                                            |  |                        |   |        |       |             |        |       |    |      |               |                |        |            |            |        |            |    |      |    |  |  |          |   |     |        |                                                                                          |   |       |  |      |        |  |
| IVRL                                                                                                                                                                                                                                                                         | +3.80                                                                                                                                                                                                                                                                                                                                                                                                                                                                                                                                                                                                                                                                                                                                                                        | NS vs IVR or L                                                                                                                                                                                                                                                                                                                                                                                                                                                                                                                                                                                                      |                                                                                                                                                                                                                                                                                                                                                                                                                                                                                                                                                                                                                                                                                                                                                                                                                                                                                                                                                                            |  |                        |   |        |       |             |        |       |    |      |               |                |        |            |            |        |            |    |      |    |  |  |          |   |     |        |                                                                                          |   |       |  |      |        |  |
| IVR                                                                                                                                                                                                                                                                          | 22%                                                                                                                                                                                                                                                                                                                                                                                                                                                                                                                                                                                                                                                                                                                                                                          | <0.05 vs L                                                                                                                                                                                                                                                                                                                                                                                                                                                                                                                                                                                                          |                                                                                                                                                                                                                                                                                                                                                                                                                                                                                                                                                                                                                                                                                                                                                                                                                                                                                                                                                                            |  |                        |   |        |       |             |        |       |    |      |               |                |        |            |            |        |            |    |      |    |  |  |          |   |     |        |                                                                                          |   |       |  |      |        |  |
| L                                                                                                                                                                                                                                                                            | 0                                                                                                                                                                                                                                                                                                                                                                                                                                                                                                                                                                                                                                                                                                                                                                            |                                                                                                                                                                                                                                                                                                                                                                                                                                                                                                                                                                                                                     |                                                                                                                                                                                                                                                                                                                                                                                                                                                                                                                                                                                                                                                                                                                                                                                                                                                                                                                                                                            |  |                        |   |        |       |             |        |       |    |      |               |                |        |            |            |        |            |    |      |    |  |  |          |   |     |        |                                                                                          |   |       |  |      |        |  |
| IVRL                                                                                                                                                                                                                                                                         | 8%                                                                                                                                                                                                                                                                                                                                                                                                                                                                                                                                                                                                                                                                                                                                                                           |                                                                                                                                                                                                                                                                                                                                                                                                                                                                                                                                                                                                                     |                                                                                                                                                                                                                                                                                                                                                                                                                                                                                                                                                                                                                                                                                                                                                                                                                                                                                                                                                                            |  |                        |   |        |       |             |        |       |    |      |               |                |        |            |            |        |            |    |      |    |  |  |          |   |     |        |                                                                                          |   |       |  |      |        |  |
|                                                                                                                                                                                                                                                                              | CMT (µm)                                                                                                                                                                                                                                                                                                                                                                                                                                                                                                                                                                                                                                                                                                                                                                     | p                                                                                                                                                                                                                                                                                                                                                                                                                                                                                                                                                                                                                   |                                                                                                                                                                                                                                                                                                                                                                                                                                                                                                                                                                                                                                                                                                                                                                                                                                                                                                                                                                            |  |                        |   |        |       |             |        |       |    |      |               |                |        |            |            |        |            |    |      |    |  |  |          |   |     |        |                                                                                          |   |       |  |      |        |  |
| IVR                                                                                                                                                                                                                                                                          | -106.3                                                                                                                                                                                                                                                                                                                                                                                                                                                                                                                                                                                                                                                                                                                                                                       | all <0.01 vs baseline, NS for elimination of ≥50% excess foveal thickness between groups                                                                                                                                                                                                                                                                                                                                                                                                                                                                                                                            |                                                                                                                                                                                                                                                                                                                                                                                                                                                                                                                                                                                                                                                                                                                                                                                                                                                                                                                                                                            |  |                        |   |        |       |             |        |       |    |      |               |                |        |            |            |        |            |    |      |    |  |  |          |   |     |        |                                                                                          |   |       |  |      |        |  |
| L                                                                                                                                                                                                                                                                            | -82.8                                                                                                                                                                                                                                                                                                                                                                                                                                                                                                                                                                                                                                                                                                                                                                        |                                                                                                                                                                                                                                                                                                                                                                                                                                                                                                                                                                                                                     |                                                                                                                                                                                                                                                                                                                                                                                                                                                                                                                                                                                                                                                                                                                                                                                                                                                                                                                                                                            |  |                        |   |        |       |             |        |       |    |      |               |                |        |            |            |        |            |    |      |    |  |  |          |   |     |        |                                                                                          |   |       |  |      |        |  |
| IVRL                                                                                                                                                                                                                                                                         | -117.2                                                                                                                                                                                                                                                                                                                                                                                                                                                                                                                                                                                                                                                                                                                                                                       |                                                                                                                                                                                                                                                                                                                                                                                                                                                                                                                                                                                                                     |                                                                                                                                                                                                                                                                                                                                                                                                                                                                                                                                                                                                                                                                                                                                                                                                                                                                                                                                                                            |  |                        |   |        |       |             |        |       |    |      |               |                |        |            |            |        |            |    |      |    |  |  |          |   |     |        |                                                                                          |   |       |  |      |        |  |
| <p><b>READ-3 Study (Do 2012)</b><br/>USA[50]</p> <p><b>Design:</b> phase 2, 2-arm RCT<br/><b>Follow-up:</b> 6 months</p>                                                                                                                                                     | <p>N: 152 eyes<br/><b>Inclusion criteria:</b> NR<br/><b>Exclusion criteria:</b> NR<br/><b>Age:</b> NR<br/><b>Sex:</b> NR<br/><b>Diabetes type:</b> NR<br/><b>HbA1c:</b> NR<br/><b>Baseline VA:</b> Mean BCVA Snellen equivalent 20/63 in the 2.0 mg group and 20/80 in the 0.5 mg group<br/><b>Baseline CST (central subfield thickness):</b> 432 µm in the 2.0 mg group and 441 µm in the 0.5 mg group<br/><b>Comorbidities:</b> NR</p>                                                                                                                                                                                                                                                                                                                                     | <p><b>Group 1 (IVR2.0, n=NR):</b> monthly injections<br/><b>Group 2 (IVR0.5, n=NR):</b> monthly injections</p> <p>After month 6, eyes evaluated and additional ranibizumab injections given on an as needed basis if DMO still present on OCT.</p>                                                                                                                                                                                                                                                                                                                                                                  | <p><b>At 6 months:</b><br/><b>BCVA</b></p> <table border="1"> <thead> <tr> <th></th> <th>Mean BCVA letters gain</th> <th>p</th> </tr> </thead> <tbody> <tr> <td>IVR2.0</td> <td>+7.46</td> <td>NR</td> </tr> <tr> <td>IVR0.5</td> <td>+8.69</td> <td>NR</td> </tr> </tbody> </table> <p><b>CST</b></p> <table border="1"> <thead> <tr> <th></th> <th>CST reduction</th> <th></th> </tr> </thead> <tbody> <tr> <td>IVR2.0</td> <td>-163.86 µm</td> <td>NR</td> </tr> <tr> <td>IVR0.5</td> <td>-169.27 µm</td> <td>NR</td> </tr> </tbody> </table>                                                                                                                                                                                                                                                                                                                                                                                                                           |  | Mean BCVA letters gain | p | IVR2.0 | +7.46 | NR          | IVR0.5 | +8.69 | NR |      | CST reduction |                | IVR2.0 | -163.86 µm | NR         | IVR0.5 | -169.27 µm | NR |      |    |  |  |          |   |     |        |                                                                                          |   |       |  |      |        |  |
|                                                                                                                                                                                                                                                                              | Mean BCVA letters gain                                                                                                                                                                                                                                                                                                                                                                                                                                                                                                                                                                                                                                                                                                                                                       | p                                                                                                                                                                                                                                                                                                                                                                                                                                                                                                                                                                                                                   |                                                                                                                                                                                                                                                                                                                                                                                                                                                                                                                                                                                                                                                                                                                                                                                                                                                                                                                                                                            |  |                        |   |        |       |             |        |       |    |      |               |                |        |            |            |        |            |    |      |    |  |  |          |   |     |        |                                                                                          |   |       |  |      |        |  |
| IVR2.0                                                                                                                                                                                                                                                                       | +7.46                                                                                                                                                                                                                                                                                                                                                                                                                                                                                                                                                                                                                                                                                                                                                                        | NR                                                                                                                                                                                                                                                                                                                                                                                                                                                                                                                                                                                                                  |                                                                                                                                                                                                                                                                                                                                                                                                                                                                                                                                                                                                                                                                                                                                                                                                                                                                                                                                                                            |  |                        |   |        |       |             |        |       |    |      |               |                |        |            |            |        |            |    |      |    |  |  |          |   |     |        |                                                                                          |   |       |  |      |        |  |
| IVR0.5                                                                                                                                                                                                                                                                       | +8.69                                                                                                                                                                                                                                                                                                                                                                                                                                                                                                                                                                                                                                                                                                                                                                        | NR                                                                                                                                                                                                                                                                                                                                                                                                                                                                                                                                                                                                                  |                                                                                                                                                                                                                                                                                                                                                                                                                                                                                                                                                                                                                                                                                                                                                                                                                                                                                                                                                                            |  |                        |   |        |       |             |        |       |    |      |               |                |        |            |            |        |            |    |      |    |  |  |          |   |     |        |                                                                                          |   |       |  |      |        |  |
|                                                                                                                                                                                                                                                                              | CST reduction                                                                                                                                                                                                                                                                                                                                                                                                                                                                                                                                                                                                                                                                                                                                                                |                                                                                                                                                                                                                                                                                                                                                                                                                                                                                                                                                                                                                     |                                                                                                                                                                                                                                                                                                                                                                                                                                                                                                                                                                                                                                                                                                                                                                                                                                                                                                                                                                            |  |                        |   |        |       |             |        |       |    |      |               |                |        |            |            |        |            |    |      |    |  |  |          |   |     |        |                                                                                          |   |       |  |      |        |  |
| IVR2.0                                                                                                                                                                                                                                                                       | -163.86 µm                                                                                                                                                                                                                                                                                                                                                                                                                                                                                                                                                                                                                                                                                                                                                                   | NR                                                                                                                                                                                                                                                                                                                                                                                                                                                                                                                                                                                                                  |                                                                                                                                                                                                                                                                                                                                                                                                                                                                                                                                                                                                                                                                                                                                                                                                                                                                                                                                                                            |  |                        |   |        |       |             |        |       |    |      |               |                |        |            |            |        |            |    |      |    |  |  |          |   |     |        |                                                                                          |   |       |  |      |        |  |
| IVR0.5                                                                                                                                                                                                                                                                       | -169.27 µm                                                                                                                                                                                                                                                                                                                                                                                                                                                                                                                                                                                                                                                                                                                                                                   | NR                                                                                                                                                                                                                                                                                                                                                                                                                                                                                                                                                                                                                  |                                                                                                                                                                                                                                                                                                                                                                                                                                                                                                                                                                                                                                                                                                                                                                                                                                                                                                                                                                            |  |                        |   |        |       |             |        |       |    |      |               |                |        |            |            |        |            |    |      |    |  |  |          |   |     |        |                                                                                          |   |       |  |      |        |  |

| Study                                                                                                                                                  | Participants and baseline values                                                                                                                                                                                                                                                                                                                                                                                                                                                                                                                                                                                                                                                                                                                                                                                                                                                                                                                                                         | Intervention                                                                                                                                                                                                                                                                                                                                                                                                                                                                                                                                                                                                                                                                                                                                                                                                                                 | Outcome (change from baseline at study end)                                                                                                                                                                                                                                                                                                                                                                                                                                                                                                                                                                                                                                                                                                                                                                                                                                                                                                                                                                                                                                                                                                                                |  |                |   |               |             |              |               |             |              |          |             |  |  |           |           |   |               |       |      |              |               |       |      |              |          |       |       |  |  |          |   |               |                |              |               |                |              |          |               |  |
|--------------------------------------------------------------------------------------------------------------------------------------------------------|------------------------------------------------------------------------------------------------------------------------------------------------------------------------------------------------------------------------------------------------------------------------------------------------------------------------------------------------------------------------------------------------------------------------------------------------------------------------------------------------------------------------------------------------------------------------------------------------------------------------------------------------------------------------------------------------------------------------------------------------------------------------------------------------------------------------------------------------------------------------------------------------------------------------------------------------------------------------------------------|----------------------------------------------------------------------------------------------------------------------------------------------------------------------------------------------------------------------------------------------------------------------------------------------------------------------------------------------------------------------------------------------------------------------------------------------------------------------------------------------------------------------------------------------------------------------------------------------------------------------------------------------------------------------------------------------------------------------------------------------------------------------------------------------------------------------------------------------|----------------------------------------------------------------------------------------------------------------------------------------------------------------------------------------------------------------------------------------------------------------------------------------------------------------------------------------------------------------------------------------------------------------------------------------------------------------------------------------------------------------------------------------------------------------------------------------------------------------------------------------------------------------------------------------------------------------------------------------------------------------------------------------------------------------------------------------------------------------------------------------------------------------------------------------------------------------------------------------------------------------------------------------------------------------------------------------------------------------------------------------------------------------------------|--|----------------|---|---------------|-------------|--------------|---------------|-------------|--------------|----------|-------------|--|--|-----------|-----------|---|---------------|-------|------|--------------|---------------|-------|------|--------------|----------|-------|-------|--|--|----------|---|---------------|----------------|--------------|---------------|----------------|--------------|----------|---------------|--|
| <b>RESOLVE Study (Massin 2010)[36]</b><br>Multicenter international<br><br><b>Design:</b> 3-arm placebo-controlled RCT<br><b>Follow-up:</b> 12 months  | N: 151 eyes of 151 patients<br><b>Inclusion criteria:</b> >18 years, type 1 or 2 DM, clinically significant DMO, BCVA 20/40 to 20/160, HbA1c <12%, decreased vision attributed to foveal thickening from DMO, laser photocoagulation could be safely withheld in the study eye for at least 3 months after randomization<br><b>Exclusion criteria:</b> unstable medical status, panretinal laser photocoagulation performed within 6 months before study entry, previous grid/laser photocoagulation except patients with only mild laser burns at least 1000 µm from the centre of the fovea performed >6 months previously<br><b>Age:</b> 63 to 65 (range 32 to 85) years<br><b>Sex:</b> 43.1 to 49.0% female<br><b>Diabetes type:</b> 96.1 to 98.0% type 2 DM<br><b>HbA1c:</b> 7.3 to 7.6 (range 5.3 to 11.1) %<br><b>Baseline VA:</b> ETDRS letter score 59.2 to 61.2 SD9.0 to 10.2<br><b>Baseline CMT:</b> 448.9 to 459.5 SD102.8 to 120.1 µm<br><b>Comorbidities:</b> not reported | <b>Group 1 (IVR0.3, n=51 eyes):</b> 0.3 mg (0.05 ml) IV ranibizumab, 3 monthly injections (dose up to 0.6 mg, see below)<br><b>Group 2 (IVR0.5, n=51 eyes):</b> 0.5 mg IV (0.05 ml) ranibizumab, 3 monthly injections (dose up to 1.0 mg, see below)<br><b>Group 3 (C, n=49 eyes):</b> sham treatment, 3 monthly injections<br><b>Regimen for all groups:</b> after month 1, the injection dose could be doubled if CMT remained >300 µm or was >225 µm and reduction in retinal oedema from previous assessment was <50 µm; once injection volume was 0.1 ml it remained that for subsequent injections; if treatment had been withheld for >45 days, subsequent injections restarted at 0.05 ml; 68.6% of dose doubling with ranibizumab, 91.8% with sham; 34.7% of rescue laser photocoagulation in sham group, 4.9% in ranibizumab group | <b>At 12 months</b><br><b>BCVA (ETDRS):</b> <table border="1"> <thead> <tr> <th></th> <th>BCVA (letters)</th> <th>p</th> </tr> </thead> <tbody> <tr> <td><i>IVR0.3</i></td> <td>+11.8 SD6.6</td> <td>&lt;0.0001 vs C</td> </tr> <tr> <td><i>IVR0.5</i></td> <td>+8.8 SD11.0</td> <td>&lt;0.0001 vs C</td> </tr> <tr> <td><i>C</i></td> <td>-1.4 SD14.2</td> <td></td> </tr> </tbody> </table><br><b>change ≥10 letters</b> <table border="1"> <thead> <tr> <th></th> <th>gain</th> <th>loss</th> <th>p</th> </tr> </thead> <tbody> <tr> <td><i>IVR0.3</i></td> <td>72.5%</td> <td>0</td> <td>&lt;0.0001 vs C</td> </tr> <tr> <td><i>IVR0.5</i></td> <td>49.0%</td> <td>9.8%</td> <td>0.001 vs C</td> </tr> <tr> <td><i>C</i></td> <td>18.4%</td> <td>24.5%</td> <td></td> </tr> </tbody> </table><br><b>CMT (OCT):</b> <table border="1"> <thead> <tr> <th></th> <th>CMT (µm)</th> <th>p</th> </tr> </thead> <tbody> <tr> <td><i>IVR0.3</i></td> <td>-200.7 SD122.2</td> <td>&lt;0.0001 vs C</td> </tr> <tr> <td><i>IVR0.5</i></td> <td>-187.6 SD147.8</td> <td>&lt;0.0001 vs C</td> </tr> <tr> <td><i>C</i></td> <td>-48.4 SD153.4</td> <td></td> </tr> </tbody> </table> |  | BCVA (letters) | p | <i>IVR0.3</i> | +11.8 SD6.6 | <0.0001 vs C | <i>IVR0.5</i> | +8.8 SD11.0 | <0.0001 vs C | <i>C</i> | -1.4 SD14.2 |  |  | gain      | loss      | p | <i>IVR0.3</i> | 72.5% | 0    | <0.0001 vs C | <i>IVR0.5</i> | 49.0% | 9.8% | 0.001 vs C   | <i>C</i> | 18.4% | 24.5% |  |  | CMT (µm) | p | <i>IVR0.3</i> | -200.7 SD122.2 | <0.0001 vs C | <i>IVR0.5</i> | -187.6 SD147.8 | <0.0001 vs C | <i>C</i> | -48.4 SD153.4 |  |
|                                                                                                                                                        | BCVA (letters)                                                                                                                                                                                                                                                                                                                                                                                                                                                                                                                                                                                                                                                                                                                                                                                                                                                                                                                                                                           | p                                                                                                                                                                                                                                                                                                                                                                                                                                                                                                                                                                                                                                                                                                                                                                                                                                            |                                                                                                                                                                                                                                                                                                                                                                                                                                                                                                                                                                                                                                                                                                                                                                                                                                                                                                                                                                                                                                                                                                                                                                            |  |                |   |               |             |              |               |             |              |          |             |  |  |           |           |   |               |       |      |              |               |       |      |              |          |       |       |  |  |          |   |               |                |              |               |                |              |          |               |  |
| <i>IVR0.3</i>                                                                                                                                          | +11.8 SD6.6                                                                                                                                                                                                                                                                                                                                                                                                                                                                                                                                                                                                                                                                                                                                                                                                                                                                                                                                                                              | <0.0001 vs C                                                                                                                                                                                                                                                                                                                                                                                                                                                                                                                                                                                                                                                                                                                                                                                                                                 |                                                                                                                                                                                                                                                                                                                                                                                                                                                                                                                                                                                                                                                                                                                                                                                                                                                                                                                                                                                                                                                                                                                                                                            |  |                |   |               |             |              |               |             |              |          |             |  |  |           |           |   |               |       |      |              |               |       |      |              |          |       |       |  |  |          |   |               |                |              |               |                |              |          |               |  |
| <i>IVR0.5</i>                                                                                                                                          | +8.8 SD11.0                                                                                                                                                                                                                                                                                                                                                                                                                                                                                                                                                                                                                                                                                                                                                                                                                                                                                                                                                                              | <0.0001 vs C                                                                                                                                                                                                                                                                                                                                                                                                                                                                                                                                                                                                                                                                                                                                                                                                                                 |                                                                                                                                                                                                                                                                                                                                                                                                                                                                                                                                                                                                                                                                                                                                                                                                                                                                                                                                                                                                                                                                                                                                                                            |  |                |   |               |             |              |               |             |              |          |             |  |  |           |           |   |               |       |      |              |               |       |      |              |          |       |       |  |  |          |   |               |                |              |               |                |              |          |               |  |
| <i>C</i>                                                                                                                                               | -1.4 SD14.2                                                                                                                                                                                                                                                                                                                                                                                                                                                                                                                                                                                                                                                                                                                                                                                                                                                                                                                                                                              |                                                                                                                                                                                                                                                                                                                                                                                                                                                                                                                                                                                                                                                                                                                                                                                                                                              |                                                                                                                                                                                                                                                                                                                                                                                                                                                                                                                                                                                                                                                                                                                                                                                                                                                                                                                                                                                                                                                                                                                                                                            |  |                |   |               |             |              |               |             |              |          |             |  |  |           |           |   |               |       |      |              |               |       |      |              |          |       |       |  |  |          |   |               |                |              |               |                |              |          |               |  |
|                                                                                                                                                        | gain                                                                                                                                                                                                                                                                                                                                                                                                                                                                                                                                                                                                                                                                                                                                                                                                                                                                                                                                                                                     | loss                                                                                                                                                                                                                                                                                                                                                                                                                                                                                                                                                                                                                                                                                                                                                                                                                                         | p                                                                                                                                                                                                                                                                                                                                                                                                                                                                                                                                                                                                                                                                                                                                                                                                                                                                                                                                                                                                                                                                                                                                                                          |  |                |   |               |             |              |               |             |              |          |             |  |  |           |           |   |               |       |      |              |               |       |      |              |          |       |       |  |  |          |   |               |                |              |               |                |              |          |               |  |
| <i>IVR0.3</i>                                                                                                                                          | 72.5%                                                                                                                                                                                                                                                                                                                                                                                                                                                                                                                                                                                                                                                                                                                                                                                                                                                                                                                                                                                    | 0                                                                                                                                                                                                                                                                                                                                                                                                                                                                                                                                                                                                                                                                                                                                                                                                                                            | <0.0001 vs C                                                                                                                                                                                                                                                                                                                                                                                                                                                                                                                                                                                                                                                                                                                                                                                                                                                                                                                                                                                                                                                                                                                                                               |  |                |   |               |             |              |               |             |              |          |             |  |  |           |           |   |               |       |      |              |               |       |      |              |          |       |       |  |  |          |   |               |                |              |               |                |              |          |               |  |
| <i>IVR0.5</i>                                                                                                                                          | 49.0%                                                                                                                                                                                                                                                                                                                                                                                                                                                                                                                                                                                                                                                                                                                                                                                                                                                                                                                                                                                    | 9.8%                                                                                                                                                                                                                                                                                                                                                                                                                                                                                                                                                                                                                                                                                                                                                                                                                                         | 0.001 vs C                                                                                                                                                                                                                                                                                                                                                                                                                                                                                                                                                                                                                                                                                                                                                                                                                                                                                                                                                                                                                                                                                                                                                                 |  |                |   |               |             |              |               |             |              |          |             |  |  |           |           |   |               |       |      |              |               |       |      |              |          |       |       |  |  |          |   |               |                |              |               |                |              |          |               |  |
| <i>C</i>                                                                                                                                               | 18.4%                                                                                                                                                                                                                                                                                                                                                                                                                                                                                                                                                                                                                                                                                                                                                                                                                                                                                                                                                                                    | 24.5%                                                                                                                                                                                                                                                                                                                                                                                                                                                                                                                                                                                                                                                                                                                                                                                                                                        |                                                                                                                                                                                                                                                                                                                                                                                                                                                                                                                                                                                                                                                                                                                                                                                                                                                                                                                                                                                                                                                                                                                                                                            |  |                |   |               |             |              |               |             |              |          |             |  |  |           |           |   |               |       |      |              |               |       |      |              |          |       |       |  |  |          |   |               |                |              |               |                |              |          |               |  |
|                                                                                                                                                        | CMT (µm)                                                                                                                                                                                                                                                                                                                                                                                                                                                                                                                                                                                                                                                                                                                                                                                                                                                                                                                                                                                 | p                                                                                                                                                                                                                                                                                                                                                                                                                                                                                                                                                                                                                                                                                                                                                                                                                                            |                                                                                                                                                                                                                                                                                                                                                                                                                                                                                                                                                                                                                                                                                                                                                                                                                                                                                                                                                                                                                                                                                                                                                                            |  |                |   |               |             |              |               |             |              |          |             |  |  |           |           |   |               |       |      |              |               |       |      |              |          |       |       |  |  |          |   |               |                |              |               |                |              |          |               |  |
| <i>IVR0.3</i>                                                                                                                                          | -200.7 SD122.2                                                                                                                                                                                                                                                                                                                                                                                                                                                                                                                                                                                                                                                                                                                                                                                                                                                                                                                                                                           | <0.0001 vs C                                                                                                                                                                                                                                                                                                                                                                                                                                                                                                                                                                                                                                                                                                                                                                                                                                 |                                                                                                                                                                                                                                                                                                                                                                                                                                                                                                                                                                                                                                                                                                                                                                                                                                                                                                                                                                                                                                                                                                                                                                            |  |                |   |               |             |              |               |             |              |          |             |  |  |           |           |   |               |       |      |              |               |       |      |              |          |       |       |  |  |          |   |               |                |              |               |                |              |          |               |  |
| <i>IVR0.5</i>                                                                                                                                          | -187.6 SD147.8                                                                                                                                                                                                                                                                                                                                                                                                                                                                                                                                                                                                                                                                                                                                                                                                                                                                                                                                                                           | <0.0001 vs C                                                                                                                                                                                                                                                                                                                                                                                                                                                                                                                                                                                                                                                                                                                                                                                                                                 |                                                                                                                                                                                                                                                                                                                                                                                                                                                                                                                                                                                                                                                                                                                                                                                                                                                                                                                                                                                                                                                                                                                                                                            |  |                |   |               |             |              |               |             |              |          |             |  |  |           |           |   |               |       |      |              |               |       |      |              |          |       |       |  |  |          |   |               |                |              |               |                |              |          |               |  |
| <i>C</i>                                                                                                                                               | -48.4 SD153.4                                                                                                                                                                                                                                                                                                                                                                                                                                                                                                                                                                                                                                                                                                                                                                                                                                                                                                                                                                            |                                                                                                                                                                                                                                                                                                                                                                                                                                                                                                                                                                                                                                                                                                                                                                                                                                              |                                                                                                                                                                                                                                                                                                                                                                                                                                                                                                                                                                                                                                                                                                                                                                                                                                                                                                                                                                                                                                                                                                                                                                            |  |                |   |               |             |              |               |             |              |          |             |  |  |           |           |   |               |       |      |              |               |       |      |              |          |       |       |  |  |          |   |               |                |              |               |                |              |          |               |  |
| <b>RESTORE Study (Mitchell 2011/ Mitchell 2012)[24,49]</b><br>Multicenter international<br><br><b>Design:</b> 3-arm RCT<br><b>Follow-up:</b> 12 months | N: 345 eyes of 345 patients<br><b>Inclusion criteria:</b> ≥18 years, type 1 or 2 DM, HbA1c ≤10%, visual impairment due to DMO (eligible for laser treatment), stable medication for management of diabetes, BCVA ETDRS letter score 39 to 78<br><b>Exclusion criteria:</b> concomitant eye conditions that could affect VA, active intraocular inflammation or infection, uncontrolled glaucoma in either eye, panretinal laser photocoagulation within 6 months or focal/grid laser photocoagulation within 3 months prior to study entry, history of stroke, hypertension.<br><b>Age:</b> 62.9 to 64.0 SD8.15 to 9.29 years<br><b>Sex:</b> 37.1 to 47.7% female<br><b>Diabetes type:</b> 86.4 to 88.8% type 2 DM<br><b>HbA1c:</b> not reported                                                                                                                                                                                                                                         | <b>Group 1 (IVR, n=116 eyes):</b> 0.5 mg IV ranibizumab plus sham laser (median injections 7 (range 1 to 12), median sham laser treatments 2 (range 1 to 5))<br><b>Group 2 (IVRL, n=118 eyes):</b> 0.5 mg IV ranibizumab plus active laser (median injections 7 (range 2 to 12), median laser treatments 1 (range 1 to 5))<br><b>Group 3 (L, n=111 eyes):</b> laser treatment plus sham injections (median sham injections 7 (range 1 to 12), median laser treatments 2 (range 1 to 4))<br><b>Regimen for all groups:</b> 3 initial monthly injections, followed by retreatment schedule; 1 injection per month if stable VA not reached;                                                                                                                                                                                                    | <b>At 12 months</b><br><b>BCVA (ETDRS):</b> <table border="1"> <thead> <tr> <th></th> <th>BCVA (letters)</th> <th>p</th> </tr> </thead> <tbody> <tr> <td><i>IVR</i></td> <td>+6.1 SD6.43</td> <td>&lt;0.0001 vs L</td> </tr> <tr> <td><i>IVRL</i></td> <td>+5.9 SD7.92</td> <td>&lt;0.0001 vs L</td> </tr> <tr> <td><i>L</i></td> <td>+0.8 SD8.56</td> <td></td> </tr> </tbody> </table><br><b>BCVA change categories</b> <table border="1"> <thead> <tr> <th></th> <th>plus ≥10:</th> <th>loss ≥10:</th> <th>p</th> </tr> </thead> <tbody> <tr> <td><i>IVR</i></td> <td>37.4%</td> <td>3.5%</td> <td>&lt;0.0001 vs L</td> </tr> <tr> <td><i>IVRL</i></td> <td>43.2%</td> <td>4.2%</td> <td>&lt;0.0001 vs L</td> </tr> <tr> <td><i>L</i></td> <td>15.5%</td> <td>12.7%</td> <td></td> </tr> </tbody> </table><br><b>CMT (OCT):</b>                                                                                                                                                                                                                                                                                                                                         |  | BCVA (letters) | p | <i>IVR</i>    | +6.1 SD6.43 | <0.0001 vs L | <i>IVRL</i>   | +5.9 SD7.92 | <0.0001 vs L | <i>L</i> | +0.8 SD8.56 |  |  | plus ≥10: | loss ≥10: | p | <i>IVR</i>    | 37.4% | 3.5% | <0.0001 vs L | <i>IVRL</i>   | 43.2% | 4.2% | <0.0001 vs L | <i>L</i> | 15.5% | 12.7% |  |  |          |   |               |                |              |               |                |              |          |               |  |
|                                                                                                                                                        | BCVA (letters)                                                                                                                                                                                                                                                                                                                                                                                                                                                                                                                                                                                                                                                                                                                                                                                                                                                                                                                                                                           | p                                                                                                                                                                                                                                                                                                                                                                                                                                                                                                                                                                                                                                                                                                                                                                                                                                            |                                                                                                                                                                                                                                                                                                                                                                                                                                                                                                                                                                                                                                                                                                                                                                                                                                                                                                                                                                                                                                                                                                                                                                            |  |                |   |               |             |              |               |             |              |          |             |  |  |           |           |   |               |       |      |              |               |       |      |              |          |       |       |  |  |          |   |               |                |              |               |                |              |          |               |  |
| <i>IVR</i>                                                                                                                                             | +6.1 SD6.43                                                                                                                                                                                                                                                                                                                                                                                                                                                                                                                                                                                                                                                                                                                                                                                                                                                                                                                                                                              | <0.0001 vs L                                                                                                                                                                                                                                                                                                                                                                                                                                                                                                                                                                                                                                                                                                                                                                                                                                 |                                                                                                                                                                                                                                                                                                                                                                                                                                                                                                                                                                                                                                                                                                                                                                                                                                                                                                                                                                                                                                                                                                                                                                            |  |                |   |               |             |              |               |             |              |          |             |  |  |           |           |   |               |       |      |              |               |       |      |              |          |       |       |  |  |          |   |               |                |              |               |                |              |          |               |  |
| <i>IVRL</i>                                                                                                                                            | +5.9 SD7.92                                                                                                                                                                                                                                                                                                                                                                                                                                                                                                                                                                                                                                                                                                                                                                                                                                                                                                                                                                              | <0.0001 vs L                                                                                                                                                                                                                                                                                                                                                                                                                                                                                                                                                                                                                                                                                                                                                                                                                                 |                                                                                                                                                                                                                                                                                                                                                                                                                                                                                                                                                                                                                                                                                                                                                                                                                                                                                                                                                                                                                                                                                                                                                                            |  |                |   |               |             |              |               |             |              |          |             |  |  |           |           |   |               |       |      |              |               |       |      |              |          |       |       |  |  |          |   |               |                |              |               |                |              |          |               |  |
| <i>L</i>                                                                                                                                               | +0.8 SD8.56                                                                                                                                                                                                                                                                                                                                                                                                                                                                                                                                                                                                                                                                                                                                                                                                                                                                                                                                                                              |                                                                                                                                                                                                                                                                                                                                                                                                                                                                                                                                                                                                                                                                                                                                                                                                                                              |                                                                                                                                                                                                                                                                                                                                                                                                                                                                                                                                                                                                                                                                                                                                                                                                                                                                                                                                                                                                                                                                                                                                                                            |  |                |   |               |             |              |               |             |              |          |             |  |  |           |           |   |               |       |      |              |               |       |      |              |          |       |       |  |  |          |   |               |                |              |               |                |              |          |               |  |
|                                                                                                                                                        | plus ≥10:                                                                                                                                                                                                                                                                                                                                                                                                                                                                                                                                                                                                                                                                                                                                                                                                                                                                                                                                                                                | loss ≥10:                                                                                                                                                                                                                                                                                                                                                                                                                                                                                                                                                                                                                                                                                                                                                                                                                                    | p                                                                                                                                                                                                                                                                                                                                                                                                                                                                                                                                                                                                                                                                                                                                                                                                                                                                                                                                                                                                                                                                                                                                                                          |  |                |   |               |             |              |               |             |              |          |             |  |  |           |           |   |               |       |      |              |               |       |      |              |          |       |       |  |  |          |   |               |                |              |               |                |              |          |               |  |
| <i>IVR</i>                                                                                                                                             | 37.4%                                                                                                                                                                                                                                                                                                                                                                                                                                                                                                                                                                                                                                                                                                                                                                                                                                                                                                                                                                                    | 3.5%                                                                                                                                                                                                                                                                                                                                                                                                                                                                                                                                                                                                                                                                                                                                                                                                                                         | <0.0001 vs L                                                                                                                                                                                                                                                                                                                                                                                                                                                                                                                                                                                                                                                                                                                                                                                                                                                                                                                                                                                                                                                                                                                                                               |  |                |   |               |             |              |               |             |              |          |             |  |  |           |           |   |               |       |      |              |               |       |      |              |          |       |       |  |  |          |   |               |                |              |               |                |              |          |               |  |
| <i>IVRL</i>                                                                                                                                            | 43.2%                                                                                                                                                                                                                                                                                                                                                                                                                                                                                                                                                                                                                                                                                                                                                                                                                                                                                                                                                                                    | 4.2%                                                                                                                                                                                                                                                                                                                                                                                                                                                                                                                                                                                                                                                                                                                                                                                                                                         | <0.0001 vs L                                                                                                                                                                                                                                                                                                                                                                                                                                                                                                                                                                                                                                                                                                                                                                                                                                                                                                                                                                                                                                                                                                                                                               |  |                |   |               |             |              |               |             |              |          |             |  |  |           |           |   |               |       |      |              |               |       |      |              |          |       |       |  |  |          |   |               |                |              |               |                |              |          |               |  |
| <i>L</i>                                                                                                                                               | 15.5%                                                                                                                                                                                                                                                                                                                                                                                                                                                                                                                                                                                                                                                                                                                                                                                                                                                                                                                                                                                    | 12.7%                                                                                                                                                                                                                                                                                                                                                                                                                                                                                                                                                                                                                                                                                                                                                                                                                                        |                                                                                                                                                                                                                                                                                                                                                                                                                                                                                                                                                                                                                                                                                                                                                                                                                                                                                                                                                                                                                                                                                                                                                                            |  |                |   |               |             |              |               |             |              |          |             |  |  |           |           |   |               |       |      |              |               |       |      |              |          |       |       |  |  |          |   |               |                |              |               |                |              |          |               |  |

| Study                                                                                                                                                                         | Participants and baseline values                                                                                                                                                                                                                                                                                                                                                                                                                                                                                                                                                                                                  | Intervention                                                                                                                                                                                                                                                                                                                                                                                                                                                       | Outcome (change from baseline at study end)                                                                                                                                                                                                                                                                                                                                                                                                                                                                                                                                                                                                                                                                                                                                                                                                                                      |  |                                                    |   |                         |                 |                  |                    |                 |                  |                     |                |  |  |                                                      |  |                         |                 |              |                    |                 |              |                     |                |  |
|-------------------------------------------------------------------------------------------------------------------------------------------------------------------------------|-----------------------------------------------------------------------------------------------------------------------------------------------------------------------------------------------------------------------------------------------------------------------------------------------------------------------------------------------------------------------------------------------------------------------------------------------------------------------------------------------------------------------------------------------------------------------------------------------------------------------------------|--------------------------------------------------------------------------------------------------------------------------------------------------------------------------------------------------------------------------------------------------------------------------------------------------------------------------------------------------------------------------------------------------------------------------------------------------------------------|----------------------------------------------------------------------------------------------------------------------------------------------------------------------------------------------------------------------------------------------------------------------------------------------------------------------------------------------------------------------------------------------------------------------------------------------------------------------------------------------------------------------------------------------------------------------------------------------------------------------------------------------------------------------------------------------------------------------------------------------------------------------------------------------------------------------------------------------------------------------------------|--|----------------------------------------------------|---|-------------------------|-----------------|------------------|--------------------|-----------------|------------------|---------------------|----------------|--|--|------------------------------------------------------|--|-------------------------|-----------------|--------------|--------------------|-----------------|--------------|---------------------|----------------|--|
|                                                                                                                                                                               | <p><b>Baseline VA:</b> ETDRS letter score 62.4 to 64.8 SD9.99 to 11.11</p> <p><b>Baseline CMT:</b> 412.4 to 426.6 SD118.01 to 123.95</p> <p><b>Comorbidities:</b> not reported</p>                                                                                                                                                                                                                                                                                                                                                                                                                                                | <p><b>Laser</b> retreatments in accordance with ETDRS guidelines at intervals no shorter than 3 months from previous treatment</p>                                                                                                                                                                                                                                                                                                                                 | <table border="1"> <thead> <tr> <th></th> <th>CMT (µm)</th> <th>p</th> </tr> </thead> <tbody> <tr> <td><i>IVR</i></td> <td>-118.7 SD115.07</td> <td>0.0002 vs L</td> </tr> <tr> <td><i>IVRL</i></td> <td>-128.3 SD114.34</td> <td>&lt;0.0001 vs L</td> </tr> <tr> <td><i>L</i></td> <td>-61.3 SD132.29</td> <td></td> </tr> </tbody> </table>                                                                                                                                                                                                                                                                                                                                                                                                                                                                                                                                    |  | CMT (µm)                                           | p | <i>IVR</i>              | -118.7 SD115.07 | 0.0002 vs L      | <i>IVRL</i>        | -128.3 SD114.34 | <0.0001 vs L     | <i>L</i>            | -61.3 SD132.29 |  |  |                                                      |  |                         |                 |              |                    |                 |              |                     |                |  |
|                                                                                                                                                                               | CMT (µm)                                                                                                                                                                                                                                                                                                                                                                                                                                                                                                                                                                                                                          | p                                                                                                                                                                                                                                                                                                                                                                                                                                                                  |                                                                                                                                                                                                                                                                                                                                                                                                                                                                                                                                                                                                                                                                                                                                                                                                                                                                                  |  |                                                    |   |                         |                 |                  |                    |                 |                  |                     |                |  |  |                                                      |  |                         |                 |              |                    |                 |              |                     |                |  |
| <i>IVR</i>                                                                                                                                                                    | -118.7 SD115.07                                                                                                                                                                                                                                                                                                                                                                                                                                                                                                                                                                                                                   | 0.0002 vs L                                                                                                                                                                                                                                                                                                                                                                                                                                                        |                                                                                                                                                                                                                                                                                                                                                                                                                                                                                                                                                                                                                                                                                                                                                                                                                                                                                  |  |                                                    |   |                         |                 |                  |                    |                 |                  |                     |                |  |  |                                                      |  |                         |                 |              |                    |                 |              |                     |                |  |
| <i>IVRL</i>                                                                                                                                                                   | -128.3 SD114.34                                                                                                                                                                                                                                                                                                                                                                                                                                                                                                                                                                                                                   | <0.0001 vs L                                                                                                                                                                                                                                                                                                                                                                                                                                                       |                                                                                                                                                                                                                                                                                                                                                                                                                                                                                                                                                                                                                                                                                                                                                                                                                                                                                  |  |                                                    |   |                         |                 |                  |                    |                 |                  |                     |                |  |  |                                                      |  |                         |                 |              |                    |                 |              |                     |                |  |
| <i>L</i>                                                                                                                                                                      | -61.3 SD132.29                                                                                                                                                                                                                                                                                                                                                                                                                                                                                                                                                                                                                    |                                                                                                                                                                                                                                                                                                                                                                                                                                                                    |                                                                                                                                                                                                                                                                                                                                                                                                                                                                                                                                                                                                                                                                                                                                                                                                                                                                                  |  |                                                    |   |                         |                 |                  |                    |                 |                  |                     |                |  |  |                                                      |  |                         |                 |              |                    |                 |              |                     |                |  |
| <p><b>REVEAL Study (Ohji 2012) Japan</b><br/>Multicenter[48]</p> <p><b>Design:</b> phase III double-masked RCT</p> <p><b>Follow-up:</b> 12 months</p>                         | <p>N: 396 patients</p> <p><b>Inclusion criteria:</b> NR</p> <p><b>Exclusion criteria:</b> NR</p> <p><b>Age:</b> 61.1 years</p> <p><b>Sex:</b> NR</p> <p><b>Diabetes type:</b> 98.7% with type 2 diabetes</p> <p><b>HbA1c:</b> 7.5%</p> <p><b>Baseline VA:</b> 58.6 letters</p> <p><b>Baseline CMT:</b> 421.9 µm</p> <p><b>Comorbidities:</b> NR</p>                                                                                                                                                                                                                                                                               | <p><b>Group 1 (IVR 0.5 + sham laser, n=133):</b> Day 1, month 1, 2 and pro-re-nata thereafter based on BCVA</p> <p><b>Group 2 (IVR 0.5+ active laser, n=132):</b> Day 1, month 1, 2 and pro-re-nata thereafter based on BCVA</p> <p><b>Group 3 (sham injection + active laser, n=131):</b> Day 1, month 1, 2 and pro-re-nata thereafter based on BCVA</p> <p>Active/sham laser photocoagulation performed according to ETDRS guidelines at ≥3 month intervals.</p> | <p><b>At 12 months</b></p> <p><b>BCVA:</b></p> <table border="1"> <thead> <tr> <th></th> <th>Mean average change from baseline to month 1 to 12</th> <th>p</th> </tr> </thead> <tbody> <tr> <td><i>IVR + sham laser</i></td> <td>+5.9</td> <td>vs laser &lt;0.0001</td> </tr> <tr> <td><i>IVR + laser</i></td> <td>+5.7</td> <td>vs laser &lt;0.0001</td> </tr> <tr> <td><i>Laser + sham</i></td> <td>+1.4</td> <td></td> </tr> </tbody> </table><br><table border="1"> <thead> <tr> <th></th> <th>Mean change from baseline to month12 in BCVA and CRT</th> <th></th> </tr> </thead> <tbody> <tr> <td><i>IVR + sham laser</i></td> <td>+6.6; -148.0 µm</td> <td>vs C &lt;0.0001</td> </tr> <tr> <td><i>IVR + laser</i></td> <td>+6.4; -163.8 µm</td> <td>vs C &lt;0.0001</td> </tr> <tr> <td><i>Laser + sham</i></td> <td>+1.8; -57.1 µm</td> <td></td> </tr> </tbody> </table> |  | Mean average change from baseline to month 1 to 12 | p | <i>IVR + sham laser</i> | +5.9            | vs laser <0.0001 | <i>IVR + laser</i> | +5.7            | vs laser <0.0001 | <i>Laser + sham</i> | +1.4           |  |  | Mean change from baseline to month12 in BCVA and CRT |  | <i>IVR + sham laser</i> | +6.6; -148.0 µm | vs C <0.0001 | <i>IVR + laser</i> | +6.4; -163.8 µm | vs C <0.0001 | <i>Laser + sham</i> | +1.8; -57.1 µm |  |
|                                                                                                                                                                               | Mean average change from baseline to month 1 to 12                                                                                                                                                                                                                                                                                                                                                                                                                                                                                                                                                                                | p                                                                                                                                                                                                                                                                                                                                                                                                                                                                  |                                                                                                                                                                                                                                                                                                                                                                                                                                                                                                                                                                                                                                                                                                                                                                                                                                                                                  |  |                                                    |   |                         |                 |                  |                    |                 |                  |                     |                |  |  |                                                      |  |                         |                 |              |                    |                 |              |                     |                |  |
| <i>IVR + sham laser</i>                                                                                                                                                       | +5.9                                                                                                                                                                                                                                                                                                                                                                                                                                                                                                                                                                                                                              | vs laser <0.0001                                                                                                                                                                                                                                                                                                                                                                                                                                                   |                                                                                                                                                                                                                                                                                                                                                                                                                                                                                                                                                                                                                                                                                                                                                                                                                                                                                  |  |                                                    |   |                         |                 |                  |                    |                 |                  |                     |                |  |  |                                                      |  |                         |                 |              |                    |                 |              |                     |                |  |
| <i>IVR + laser</i>                                                                                                                                                            | +5.7                                                                                                                                                                                                                                                                                                                                                                                                                                                                                                                                                                                                                              | vs laser <0.0001                                                                                                                                                                                                                                                                                                                                                                                                                                                   |                                                                                                                                                                                                                                                                                                                                                                                                                                                                                                                                                                                                                                                                                                                                                                                                                                                                                  |  |                                                    |   |                         |                 |                  |                    |                 |                  |                     |                |  |  |                                                      |  |                         |                 |              |                    |                 |              |                     |                |  |
| <i>Laser + sham</i>                                                                                                                                                           | +1.4                                                                                                                                                                                                                                                                                                                                                                                                                                                                                                                                                                                                                              |                                                                                                                                                                                                                                                                                                                                                                                                                                                                    |                                                                                                                                                                                                                                                                                                                                                                                                                                                                                                                                                                                                                                                                                                                                                                                                                                                                                  |  |                                                    |   |                         |                 |                  |                    |                 |                  |                     |                |  |  |                                                      |  |                         |                 |              |                    |                 |              |                     |                |  |
|                                                                                                                                                                               | Mean change from baseline to month12 in BCVA and CRT                                                                                                                                                                                                                                                                                                                                                                                                                                                                                                                                                                              |                                                                                                                                                                                                                                                                                                                                                                                                                                                                    |                                                                                                                                                                                                                                                                                                                                                                                                                                                                                                                                                                                                                                                                                                                                                                                                                                                                                  |  |                                                    |   |                         |                 |                  |                    |                 |                  |                     |                |  |  |                                                      |  |                         |                 |              |                    |                 |              |                     |                |  |
| <i>IVR + sham laser</i>                                                                                                                                                       | +6.6; -148.0 µm                                                                                                                                                                                                                                                                                                                                                                                                                                                                                                                                                                                                                   | vs C <0.0001                                                                                                                                                                                                                                                                                                                                                                                                                                                       |                                                                                                                                                                                                                                                                                                                                                                                                                                                                                                                                                                                                                                                                                                                                                                                                                                                                                  |  |                                                    |   |                         |                 |                  |                    |                 |                  |                     |                |  |  |                                                      |  |                         |                 |              |                    |                 |              |                     |                |  |
| <i>IVR + laser</i>                                                                                                                                                            | +6.4; -163.8 µm                                                                                                                                                                                                                                                                                                                                                                                                                                                                                                                                                                                                                   | vs C <0.0001                                                                                                                                                                                                                                                                                                                                                                                                                                                       |                                                                                                                                                                                                                                                                                                                                                                                                                                                                                                                                                                                                                                                                                                                                                                                                                                                                                  |  |                                                    |   |                         |                 |                  |                    |                 |                  |                     |                |  |  |                                                      |  |                         |                 |              |                    |                 |              |                     |                |  |
| <i>Laser + sham</i>                                                                                                                                                           | +1.8; -57.1 µm                                                                                                                                                                                                                                                                                                                                                                                                                                                                                                                                                                                                                    |                                                                                                                                                                                                                                                                                                                                                                                                                                                                    |                                                                                                                                                                                                                                                                                                                                                                                                                                                                                                                                                                                                                                                                                                                                                                                                                                                                                  |  |                                                    |   |                         |                 |                  |                    |                 |                  |                     |                |  |  |                                                      |  |                         |                 |              |                    |                 |              |                     |                |  |
| <p><b>RISE Study (Brown 2011/Nguyen 2012)[38,139] USA</b><br/>Multicenter</p> <p><b>Design:</b> 3-arm double-blind sham-controlled RCT</p> <p><b>Follow-up:</b> 24 months</p> | <p>N: 377 eyes of 377 patients</p> <p><b>Inclusion criteria:</b> ≥18 years, type 1 or 2 diabetes, BCVA 20/40 to 20/320, DMO CMT ≥275 µm</p> <p><b>Exclusion criteria:</b> prior vitreoretinal surgery, recent history (within 3 months of screening) of panretinal or macular laser in the study eye, intraocular corticosteroids or antiangiogenic drugs, those with uncontrolled hypertension, uncontrolled diabetes (HbA1c &gt;12%), recent (within 3 months) cerebrovascular accident or myocardial infarction</p> <p><b>Age:</b> 61.7 to 62.8 SD8.9 to 10.0 (range 21 to 87) years</p> <p><b>Sex:</b> 41.6 to 48% female</p> | <p><b>Group 1 (IVR0.3, n=125 eyes):</b> 0.3 mg IV ranibizumab</p> <p><b>Group 2 (IVR0.5, n=125 eyes):</b> 0.5 mg IV ranibizumab</p> <p><b>Group 3 (C, n=127 eyes):</b> sham injection</p> <p><b>Regimen for all groups:</b> monthly injections; need for macular rescue laser assessed monthly starting at month 3</p>                                                                                                                                             | <p><b>At 24 months</b></p> <p><b>BCVA:</b></p> <table border="1"> <thead> <tr> <th></th> <th>plus ≥15 letters</th> <th>p</th> </tr> </thead> <tbody> <tr> <td><i>IVR0.3</i></td> <td>44.8%</td> <td>&lt;0.0001 vs C</td> </tr> <tr> <td><i>IVR0.5</i></td> <td>39.2%</td> <td>=0.0002 vs C</td> </tr> <tr> <td><i>C</i></td> <td>18.1%</td> <td></td> </tr> </tbody> </table><br><table border="1"> <thead> <tr> <th></th> <th>Loss of &lt;15 letters</th> <th></th> </tr> </thead> <tbody> <tr> <td><i>IVR0.3</i></td> <td>97.6%</td> <td>=0.0086 vs C</td> </tr> <tr> <td><i>IVR0.5</i></td> <td>97.6%</td> <td>=0.0126 vs C</td> </tr> <tr> <td><i>C</i></td> <td>89.8%</td> <td></td> </tr> </tbody> </table>                                                                                                                                                                |  | plus ≥15 letters                                   | p | <i>IVR0.3</i>           | 44.8%           | <0.0001 vs C     | <i>IVR0.5</i>      | 39.2%           | =0.0002 vs C     | <i>C</i>            | 18.1%          |  |  | Loss of <15 letters                                  |  | <i>IVR0.3</i>           | 97.6%           | =0.0086 vs C | <i>IVR0.5</i>      | 97.6%           | =0.0126 vs C | <i>C</i>            | 89.8%          |  |
|                                                                                                                                                                               | plus ≥15 letters                                                                                                                                                                                                                                                                                                                                                                                                                                                                                                                                                                                                                  | p                                                                                                                                                                                                                                                                                                                                                                                                                                                                  |                                                                                                                                                                                                                                                                                                                                                                                                                                                                                                                                                                                                                                                                                                                                                                                                                                                                                  |  |                                                    |   |                         |                 |                  |                    |                 |                  |                     |                |  |  |                                                      |  |                         |                 |              |                    |                 |              |                     |                |  |
| <i>IVR0.3</i>                                                                                                                                                                 | 44.8%                                                                                                                                                                                                                                                                                                                                                                                                                                                                                                                                                                                                                             | <0.0001 vs C                                                                                                                                                                                                                                                                                                                                                                                                                                                       |                                                                                                                                                                                                                                                                                                                                                                                                                                                                                                                                                                                                                                                                                                                                                                                                                                                                                  |  |                                                    |   |                         |                 |                  |                    |                 |                  |                     |                |  |  |                                                      |  |                         |                 |              |                    |                 |              |                     |                |  |
| <i>IVR0.5</i>                                                                                                                                                                 | 39.2%                                                                                                                                                                                                                                                                                                                                                                                                                                                                                                                                                                                                                             | =0.0002 vs C                                                                                                                                                                                                                                                                                                                                                                                                                                                       |                                                                                                                                                                                                                                                                                                                                                                                                                                                                                                                                                                                                                                                                                                                                                                                                                                                                                  |  |                                                    |   |                         |                 |                  |                    |                 |                  |                     |                |  |  |                                                      |  |                         |                 |              |                    |                 |              |                     |                |  |
| <i>C</i>                                                                                                                                                                      | 18.1%                                                                                                                                                                                                                                                                                                                                                                                                                                                                                                                                                                                                                             |                                                                                                                                                                                                                                                                                                                                                                                                                                                                    |                                                                                                                                                                                                                                                                                                                                                                                                                                                                                                                                                                                                                                                                                                                                                                                                                                                                                  |  |                                                    |   |                         |                 |                  |                    |                 |                  |                     |                |  |  |                                                      |  |                         |                 |              |                    |                 |              |                     |                |  |
|                                                                                                                                                                               | Loss of <15 letters                                                                                                                                                                                                                                                                                                                                                                                                                                                                                                                                                                                                               |                                                                                                                                                                                                                                                                                                                                                                                                                                                                    |                                                                                                                                                                                                                                                                                                                                                                                                                                                                                                                                                                                                                                                                                                                                                                                                                                                                                  |  |                                                    |   |                         |                 |                  |                    |                 |                  |                     |                |  |  |                                                      |  |                         |                 |              |                    |                 |              |                     |                |  |
| <i>IVR0.3</i>                                                                                                                                                                 | 97.6%                                                                                                                                                                                                                                                                                                                                                                                                                                                                                                                                                                                                                             | =0.0086 vs C                                                                                                                                                                                                                                                                                                                                                                                                                                                       |                                                                                                                                                                                                                                                                                                                                                                                                                                                                                                                                                                                                                                                                                                                                                                                                                                                                                  |  |                                                    |   |                         |                 |                  |                    |                 |                  |                     |                |  |  |                                                      |  |                         |                 |              |                    |                 |              |                     |                |  |
| <i>IVR0.5</i>                                                                                                                                                                 | 97.6%                                                                                                                                                                                                                                                                                                                                                                                                                                                                                                                                                                                                                             | =0.0126 vs C                                                                                                                                                                                                                                                                                                                                                                                                                                                       |                                                                                                                                                                                                                                                                                                                                                                                                                                                                                                                                                                                                                                                                                                                                                                                                                                                                                  |  |                                                    |   |                         |                 |                  |                    |                 |                  |                     |                |  |  |                                                      |  |                         |                 |              |                    |                 |              |                     |                |  |
| <i>C</i>                                                                                                                                                                      | 89.8%                                                                                                                                                                                                                                                                                                                                                                                                                                                                                                                                                                                                                             |                                                                                                                                                                                                                                                                                                                                                                                                                                                                    |                                                                                                                                                                                                                                                                                                                                                                                                                                                                                                                                                                                                                                                                                                                                                                                                                                                                                  |  |                                                    |   |                         |                 |                  |                    |                 |                  |                     |                |  |  |                                                      |  |                         |                 |              |                    |                 |              |                     |                |  |



| Study                                                                                                                                                                                  | Participants and baseline values                                                                                                                                                                                                                                                                                                                                                                                                                                                                                                                                                                                                                                                                                                                                                         | Intervention                                                                                                                                                                                                                                                                                  | Outcome (change from baseline at study end)                                                                                                                                                                                                                                                                                                                                                                                                                                                                                                                                                                                                                                                                                                                                                                                                                                                                                                                                                     |               |                      |              |               |       |               |               |       |               |               |              |              |               |              |              |               |             |             |          |                           |   |               |                   |              |               |                   |              |          |                   |  |
|----------------------------------------------------------------------------------------------------------------------------------------------------------------------------------------|------------------------------------------------------------------------------------------------------------------------------------------------------------------------------------------------------------------------------------------------------------------------------------------------------------------------------------------------------------------------------------------------------------------------------------------------------------------------------------------------------------------------------------------------------------------------------------------------------------------------------------------------------------------------------------------------------------------------------------------------------------------------------------------|-----------------------------------------------------------------------------------------------------------------------------------------------------------------------------------------------------------------------------------------------------------------------------------------------|-------------------------------------------------------------------------------------------------------------------------------------------------------------------------------------------------------------------------------------------------------------------------------------------------------------------------------------------------------------------------------------------------------------------------------------------------------------------------------------------------------------------------------------------------------------------------------------------------------------------------------------------------------------------------------------------------------------------------------------------------------------------------------------------------------------------------------------------------------------------------------------------------------------------------------------------------------------------------------------------------|---------------|----------------------|--------------|---------------|-------|---------------|---------------|-------|---------------|---------------|--------------|--------------|---------------|--------------|--------------|---------------|-------------|-------------|----------|---------------------------|---|---------------|-------------------|--------------|---------------|-------------------|--------------|----------|-------------------|--|
|                                                                                                                                                                                        | <p><b>Diabetes type:</b> type 1 or 2<br/> <b>HbA1c:</b> 7.7% SD 1.4 to 1.5; ≤8% (65 to 68.3%); &gt;8% (31.7% to 35%)<br/> <b>Baseline VA:</b> Mean ETDRS letter score 54.7 to 57.2; ≤20/200 (7.9 to 13.6%); &gt;20/200 but &lt;20/40 (72.4 to 72.8%); ≥20/40 (13.6 to 19.7%)<br/> <b>Baseline CMT:</b> 463.8 to 474.5 μm<br/> <b>Comorbidities:</b> History of smoking 46.4 to 51.2%</p>                                                                                                                                                                                                                                                                                                                                                                                                 |                                                                                                                                                                                                                                                                                               | <p><b>Snellen equivalent of 20/40 or better</b></p> <table border="1"> <tr> <td><i>IVR0.3</i></td> <td>60.0%</td> <td>&lt;0.0001 vs C</td> </tr> <tr> <td><i>IVR0.5</i></td> <td>63.2%</td> <td>&lt;0.0001 vs C</td> </tr> <tr> <td><i>C</i></td> <td>37.8%</td> <td></td> </tr> </table> <p><b>Mean BCVA gain (letters)</b></p> <table border="1"> <tr> <td><i>IVR0.3</i></td> <td>+12.5 SD14.1</td> <td>&lt;0.0001 vs C</td> </tr> <tr> <td><i>IVR0.5</i></td> <td>+11.9 SD12.1</td> <td>&lt;0.0001 vs C</td> </tr> <tr> <td><i>C</i></td> <td>+2.6 SD13.9</td> <td></td> </tr> </table> <p><b>CFT:</b></p> <table border="1"> <thead> <tr> <th></th> <th>Mean change from baseline</th> <th>p</th> </tr> </thead> <tbody> <tr> <td><i>IVR0.3</i></td> <td>-250.6<br/>SD212.2</td> <td>&lt;0.0001 vs C</td> </tr> <tr> <td><i>IVR0.5</i></td> <td>-253.1<br/>SD183.7</td> <td>&lt;0.0001 vs C</td> </tr> <tr> <td><i>C</i></td> <td>-133.4<br/>SD209.0</td> <td></td> </tr> </tbody> </table> | <i>IVR0.3</i> | 60.0%                | <0.0001 vs C | <i>IVR0.5</i> | 63.2% | <0.0001 vs C  | <i>C</i>      | 37.8% |               | <i>IVR0.3</i> | +12.5 SD14.1 | <0.0001 vs C | <i>IVR0.5</i> | +11.9 SD12.1 | <0.0001 vs C | <i>C</i>      | +2.6 SD13.9 |             |          | Mean change from baseline | p | <i>IVR0.3</i> | -250.6<br>SD212.2 | <0.0001 vs C | <i>IVR0.5</i> | -253.1<br>SD183.7 | <0.0001 vs C | <i>C</i> | -133.4<br>SD209.0 |  |
| <i>IVR0.3</i>                                                                                                                                                                          | 60.0%                                                                                                                                                                                                                                                                                                                                                                                                                                                                                                                                                                                                                                                                                                                                                                                    | <0.0001 vs C                                                                                                                                                                                                                                                                                  |                                                                                                                                                                                                                                                                                                                                                                                                                                                                                                                                                                                                                                                                                                                                                                                                                                                                                                                                                                                                 |               |                      |              |               |       |               |               |       |               |               |              |              |               |              |              |               |             |             |          |                           |   |               |                   |              |               |                   |              |          |                   |  |
| <i>IVR0.5</i>                                                                                                                                                                          | 63.2%                                                                                                                                                                                                                                                                                                                                                                                                                                                                                                                                                                                                                                                                                                                                                                                    | <0.0001 vs C                                                                                                                                                                                                                                                                                  |                                                                                                                                                                                                                                                                                                                                                                                                                                                                                                                                                                                                                                                                                                                                                                                                                                                                                                                                                                                                 |               |                      |              |               |       |               |               |       |               |               |              |              |               |              |              |               |             |             |          |                           |   |               |                   |              |               |                   |              |          |                   |  |
| <i>C</i>                                                                                                                                                                               | 37.8%                                                                                                                                                                                                                                                                                                                                                                                                                                                                                                                                                                                                                                                                                                                                                                                    |                                                                                                                                                                                                                                                                                               |                                                                                                                                                                                                                                                                                                                                                                                                                                                                                                                                                                                                                                                                                                                                                                                                                                                                                                                                                                                                 |               |                      |              |               |       |               |               |       |               |               |              |              |               |              |              |               |             |             |          |                           |   |               |                   |              |               |                   |              |          |                   |  |
| <i>IVR0.3</i>                                                                                                                                                                          | +12.5 SD14.1                                                                                                                                                                                                                                                                                                                                                                                                                                                                                                                                                                                                                                                                                                                                                                             | <0.0001 vs C                                                                                                                                                                                                                                                                                  |                                                                                                                                                                                                                                                                                                                                                                                                                                                                                                                                                                                                                                                                                                                                                                                                                                                                                                                                                                                                 |               |                      |              |               |       |               |               |       |               |               |              |              |               |              |              |               |             |             |          |                           |   |               |                   |              |               |                   |              |          |                   |  |
| <i>IVR0.5</i>                                                                                                                                                                          | +11.9 SD12.1                                                                                                                                                                                                                                                                                                                                                                                                                                                                                                                                                                                                                                                                                                                                                                             | <0.0001 vs C                                                                                                                                                                                                                                                                                  |                                                                                                                                                                                                                                                                                                                                                                                                                                                                                                                                                                                                                                                                                                                                                                                                                                                                                                                                                                                                 |               |                      |              |               |       |               |               |       |               |               |              |              |               |              |              |               |             |             |          |                           |   |               |                   |              |               |                   |              |          |                   |  |
| <i>C</i>                                                                                                                                                                               | +2.6 SD13.9                                                                                                                                                                                                                                                                                                                                                                                                                                                                                                                                                                                                                                                                                                                                                                              |                                                                                                                                                                                                                                                                                               |                                                                                                                                                                                                                                                                                                                                                                                                                                                                                                                                                                                                                                                                                                                                                                                                                                                                                                                                                                                                 |               |                      |              |               |       |               |               |       |               |               |              |              |               |              |              |               |             |             |          |                           |   |               |                   |              |               |                   |              |          |                   |  |
|                                                                                                                                                                                        | Mean change from baseline                                                                                                                                                                                                                                                                                                                                                                                                                                                                                                                                                                                                                                                                                                                                                                | p                                                                                                                                                                                                                                                                                             |                                                                                                                                                                                                                                                                                                                                                                                                                                                                                                                                                                                                                                                                                                                                                                                                                                                                                                                                                                                                 |               |                      |              |               |       |               |               |       |               |               |              |              |               |              |              |               |             |             |          |                           |   |               |                   |              |               |                   |              |          |                   |  |
| <i>IVR0.3</i>                                                                                                                                                                          | -250.6<br>SD212.2                                                                                                                                                                                                                                                                                                                                                                                                                                                                                                                                                                                                                                                                                                                                                                        | <0.0001 vs C                                                                                                                                                                                                                                                                                  |                                                                                                                                                                                                                                                                                                                                                                                                                                                                                                                                                                                                                                                                                                                                                                                                                                                                                                                                                                                                 |               |                      |              |               |       |               |               |       |               |               |              |              |               |              |              |               |             |             |          |                           |   |               |                   |              |               |                   |              |          |                   |  |
| <i>IVR0.5</i>                                                                                                                                                                          | -253.1<br>SD183.7                                                                                                                                                                                                                                                                                                                                                                                                                                                                                                                                                                                                                                                                                                                                                                        | <0.0001 vs C                                                                                                                                                                                                                                                                                  |                                                                                                                                                                                                                                                                                                                                                                                                                                                                                                                                                                                                                                                                                                                                                                                                                                                                                                                                                                                                 |               |                      |              |               |       |               |               |       |               |               |              |              |               |              |              |               |             |             |          |                           |   |               |                   |              |               |                   |              |          |                   |  |
| <i>C</i>                                                                                                                                                                               | -133.4<br>SD209.0                                                                                                                                                                                                                                                                                                                                                                                                                                                                                                                                                                                                                                                                                                                                                                        |                                                                                                                                                                                                                                                                                               |                                                                                                                                                                                                                                                                                                                                                                                                                                                                                                                                                                                                                                                                                                                                                                                                                                                                                                                                                                                                 |               |                      |              |               |       |               |               |       |               |               |              |              |               |              |              |               |             |             |          |                           |   |               |                   |              |               |                   |              |          |                   |  |
| <p><b>RIDE study (Boyer 2011/Nguyen 2012)[38,140] USA</b><br/>           Multicentre</p> <p><b>Design:</b> 3-arm double-blind sham-controlled RCT<br/> <b>Follow-up:</b> 24 months</p> | <p><b>N:</b> 382 eyes<br/> <b>Inclusion criteria:</b> ≥18 years, type 1 or 2 diabetes, BCVA 20/40-20/320 and DMO CMT ≥275 μm<br/> <b>Exclusion criteria:</b> prior vitreoretinal surgery, recent history (within 3 months of screening) of panretinal or macular laser in the study eye, intraocular corticosteroids or antiangiogenic drugs, those with uncontrolled hypertension, uncontrolled diabetes (HbA1c &gt;12%), recent (within 3 months) cerebrovascular accident or myocardial infarction<br/> <b>Age:</b> 61.8 to 63.5 (range 22 to 91) years<br/> <b>Sex:</b> 37 to 49.1% female<br/> <b>Diabetes type:</b> type 1 or 2<br/> <b>HbA1c:</b> 7.6 SD1.3 to 1.5; ≤8% (65.8 to 67.5%); &gt;8% (32.5 to 34.2%)<br/> <b>Baseline VA:</b> Mean ETDRS letter score 56.9 to 57.5</p> | <p><b>Group 1 (IVR0.3, n=125 eyes):</b> 0.3 mg IV ranibizumab<br/> <b>Group 2 (IVR0.5, n=127 eyes):</b> 0.5 mg IV ranibizumab<br/> <b>Group 3 (C, n=130 eyes):</b> sham injection<br/> <b>Regimen for all groups:</b> Patients were eligible for rescue macular laser starting at Month 3</p> | <p><b>At 24 months BCVA:</b></p> <table border="1"> <thead> <tr> <th></th> <th>More than 15 letters</th> <th>p</th> </tr> </thead> <tbody> <tr> <td><i>IVR0.3</i></td> <td>33.6%</td> <td>&lt;0.0001 vs. C</td> </tr> <tr> <td><i>IVR0.5</i></td> <td>45.7%</td> <td>&lt;0.0001 vs. C</td> </tr> <tr> <td><i>C</i></td> <td>12.3%</td> <td></td> </tr> </tbody> </table> <p><b>Less than 15 letters</b></p> <table border="1"> <tr> <td><i>IVR0.3</i></td> <td>1.6%</td> <td>&gt;0.05 vs C</td> </tr> <tr> <td><i>IVR0.5</i></td> <td>3.9%</td> <td>&lt;0.05 vs. C</td> </tr> <tr> <td><i>C</i></td> <td>8.5%</td> <td></td> </tr> </table> <p><b>Snellen equivalent of 20/40 or better</b></p> <table border="1"> <tr> <td><i>IVR0.3</i></td> <td>54.4%</td> <td>=0.0002 vs C</td> </tr> </table>                                                                                                                                                                                              |               | More than 15 letters | p            | <i>IVR0.3</i> | 33.6% | <0.0001 vs. C | <i>IVR0.5</i> | 45.7% | <0.0001 vs. C | <i>C</i>      | 12.3%        |              | <i>IVR0.3</i> | 1.6%         | >0.05 vs C   | <i>IVR0.5</i> | 3.9%        | <0.05 vs. C | <i>C</i> | 8.5%                      |   | <i>IVR0.3</i> | 54.4%             | =0.0002 vs C |               |                   |              |          |                   |  |
|                                                                                                                                                                                        | More than 15 letters                                                                                                                                                                                                                                                                                                                                                                                                                                                                                                                                                                                                                                                                                                                                                                     | p                                                                                                                                                                                                                                                                                             |                                                                                                                                                                                                                                                                                                                                                                                                                                                                                                                                                                                                                                                                                                                                                                                                                                                                                                                                                                                                 |               |                      |              |               |       |               |               |       |               |               |              |              |               |              |              |               |             |             |          |                           |   |               |                   |              |               |                   |              |          |                   |  |
| <i>IVR0.3</i>                                                                                                                                                                          | 33.6%                                                                                                                                                                                                                                                                                                                                                                                                                                                                                                                                                                                                                                                                                                                                                                                    | <0.0001 vs. C                                                                                                                                                                                                                                                                                 |                                                                                                                                                                                                                                                                                                                                                                                                                                                                                                                                                                                                                                                                                                                                                                                                                                                                                                                                                                                                 |               |                      |              |               |       |               |               |       |               |               |              |              |               |              |              |               |             |             |          |                           |   |               |                   |              |               |                   |              |          |                   |  |
| <i>IVR0.5</i>                                                                                                                                                                          | 45.7%                                                                                                                                                                                                                                                                                                                                                                                                                                                                                                                                                                                                                                                                                                                                                                                    | <0.0001 vs. C                                                                                                                                                                                                                                                                                 |                                                                                                                                                                                                                                                                                                                                                                                                                                                                                                                                                                                                                                                                                                                                                                                                                                                                                                                                                                                                 |               |                      |              |               |       |               |               |       |               |               |              |              |               |              |              |               |             |             |          |                           |   |               |                   |              |               |                   |              |          |                   |  |
| <i>C</i>                                                                                                                                                                               | 12.3%                                                                                                                                                                                                                                                                                                                                                                                                                                                                                                                                                                                                                                                                                                                                                                                    |                                                                                                                                                                                                                                                                                               |                                                                                                                                                                                                                                                                                                                                                                                                                                                                                                                                                                                                                                                                                                                                                                                                                                                                                                                                                                                                 |               |                      |              |               |       |               |               |       |               |               |              |              |               |              |              |               |             |             |          |                           |   |               |                   |              |               |                   |              |          |                   |  |
| <i>IVR0.3</i>                                                                                                                                                                          | 1.6%                                                                                                                                                                                                                                                                                                                                                                                                                                                                                                                                                                                                                                                                                                                                                                                     | >0.05 vs C                                                                                                                                                                                                                                                                                    |                                                                                                                                                                                                                                                                                                                                                                                                                                                                                                                                                                                                                                                                                                                                                                                                                                                                                                                                                                                                 |               |                      |              |               |       |               |               |       |               |               |              |              |               |              |              |               |             |             |          |                           |   |               |                   |              |               |                   |              |          |                   |  |
| <i>IVR0.5</i>                                                                                                                                                                          | 3.9%                                                                                                                                                                                                                                                                                                                                                                                                                                                                                                                                                                                                                                                                                                                                                                                     | <0.05 vs. C                                                                                                                                                                                                                                                                                   |                                                                                                                                                                                                                                                                                                                                                                                                                                                                                                                                                                                                                                                                                                                                                                                                                                                                                                                                                                                                 |               |                      |              |               |       |               |               |       |               |               |              |              |               |              |              |               |             |             |          |                           |   |               |                   |              |               |                   |              |          |                   |  |
| <i>C</i>                                                                                                                                                                               | 8.5%                                                                                                                                                                                                                                                                                                                                                                                                                                                                                                                                                                                                                                                                                                                                                                                     |                                                                                                                                                                                                                                                                                               |                                                                                                                                                                                                                                                                                                                                                                                                                                                                                                                                                                                                                                                                                                                                                                                                                                                                                                                                                                                                 |               |                      |              |               |       |               |               |       |               |               |              |              |               |              |              |               |             |             |          |                           |   |               |                   |              |               |                   |              |          |                   |  |
| <i>IVR0.3</i>                                                                                                                                                                          | 54.4%                                                                                                                                                                                                                                                                                                                                                                                                                                                                                                                                                                                                                                                                                                                                                                                    | =0.0002 vs C                                                                                                                                                                                                                                                                                  |                                                                                                                                                                                                                                                                                                                                                                                                                                                                                                                                                                                                                                                                                                                                                                                                                                                                                                                                                                                                 |               |                      |              |               |       |               |               |       |               |               |              |              |               |              |              |               |             |             |          |                           |   |               |                   |              |               |                   |              |          |                   |  |

| Study                           | Participants and baseline values                                                                            | Intervention  | Outcome (change from baseline at study end)                                                                                                                                                                                                                                                                                                                                                                                                                                                                                                                                                                                                                                                                                                                                                                                  |               |       |              |          |       |  |                                 |  |  |               |              |              |               |              |               |          |             |  |             |  |  |  |                                  |          |               |                |              |               |                |              |          |                |  |
|---------------------------------|-------------------------------------------------------------------------------------------------------------|---------------|------------------------------------------------------------------------------------------------------------------------------------------------------------------------------------------------------------------------------------------------------------------------------------------------------------------------------------------------------------------------------------------------------------------------------------------------------------------------------------------------------------------------------------------------------------------------------------------------------------------------------------------------------------------------------------------------------------------------------------------------------------------------------------------------------------------------------|---------------|-------|--------------|----------|-------|--|---------------------------------|--|--|---------------|--------------|--------------|---------------|--------------|---------------|----------|-------------|--|-------------|--|--|--|----------------------------------|----------|---------------|----------------|--------------|---------------|----------------|--------------|----------|----------------|--|
|                                 | <b>Baseline CMT:</b> 447.4 to 482.6 $\mu\text{m}$<br><b>Comorbidities:</b> history of smoking 33.6 to 51.6% |               | <table border="0"> <tr> <td><b>IVR0.5</b></td> <td>62.2%</td> <td>&lt;0.0001 vs C</td> </tr> <tr> <td><b>C</b></td> <td>34.6%</td> <td></td> </tr> <tr> <td colspan="3"><b>Mean BCVA gain (letters)</b></td> </tr> <tr> <td><b>IVR0.3</b></td> <td>+10.9 SD10.4</td> <td>&lt;0.0001 vs C</td> </tr> <tr> <td><b>IVR0.5</b></td> <td>+12.0 SD14.9</td> <td>&lt;0.0001 vs. C</td> </tr> <tr> <td><b>C</b></td> <td>+2.3 SD14.2</td> <td></td> </tr> <tr> <td colspan="3"><b>CMT:</b></td> </tr> <tr> <td></td> <td><b>Mean change from baseline</b></td> <td><b>p</b></td> </tr> <tr> <td><b>IVR0.3</b></td> <td>-259.8 SD169.3</td> <td>&lt;0.0001 vs C</td> </tr> <tr> <td><b>IVR0.5</b></td> <td>-270.7 SD201.6</td> <td>&lt;0.0001 vs C</td> </tr> <tr> <td><b>C</b></td> <td>-125.8 SD198.3</td> <td></td> </tr> </table> | <b>IVR0.5</b> | 62.2% | <0.0001 vs C | <b>C</b> | 34.6% |  | <b>Mean BCVA gain (letters)</b> |  |  | <b>IVR0.3</b> | +10.9 SD10.4 | <0.0001 vs C | <b>IVR0.5</b> | +12.0 SD14.9 | <0.0001 vs. C | <b>C</b> | +2.3 SD14.2 |  | <b>CMT:</b> |  |  |  | <b>Mean change from baseline</b> | <b>p</b> | <b>IVR0.3</b> | -259.8 SD169.3 | <0.0001 vs C | <b>IVR0.5</b> | -270.7 SD201.6 | <0.0001 vs C | <b>C</b> | -125.8 SD198.3 |  |
| <b>IVR0.5</b>                   | 62.2%                                                                                                       | <0.0001 vs C  |                                                                                                                                                                                                                                                                                                                                                                                                                                                                                                                                                                                                                                                                                                                                                                                                                              |               |       |              |          |       |  |                                 |  |  |               |              |              |               |              |               |          |             |  |             |  |  |  |                                  |          |               |                |              |               |                |              |          |                |  |
| <b>C</b>                        | 34.6%                                                                                                       |               |                                                                                                                                                                                                                                                                                                                                                                                                                                                                                                                                                                                                                                                                                                                                                                                                                              |               |       |              |          |       |  |                                 |  |  |               |              |              |               |              |               |          |             |  |             |  |  |  |                                  |          |               |                |              |               |                |              |          |                |  |
| <b>Mean BCVA gain (letters)</b> |                                                                                                             |               |                                                                                                                                                                                                                                                                                                                                                                                                                                                                                                                                                                                                                                                                                                                                                                                                                              |               |       |              |          |       |  |                                 |  |  |               |              |              |               |              |               |          |             |  |             |  |  |  |                                  |          |               |                |              |               |                |              |          |                |  |
| <b>IVR0.3</b>                   | +10.9 SD10.4                                                                                                | <0.0001 vs C  |                                                                                                                                                                                                                                                                                                                                                                                                                                                                                                                                                                                                                                                                                                                                                                                                                              |               |       |              |          |       |  |                                 |  |  |               |              |              |               |              |               |          |             |  |             |  |  |  |                                  |          |               |                |              |               |                |              |          |                |  |
| <b>IVR0.5</b>                   | +12.0 SD14.9                                                                                                | <0.0001 vs. C |                                                                                                                                                                                                                                                                                                                                                                                                                                                                                                                                                                                                                                                                                                                                                                                                                              |               |       |              |          |       |  |                                 |  |  |               |              |              |               |              |               |          |             |  |             |  |  |  |                                  |          |               |                |              |               |                |              |          |                |  |
| <b>C</b>                        | +2.3 SD14.2                                                                                                 |               |                                                                                                                                                                                                                                                                                                                                                                                                                                                                                                                                                                                                                                                                                                                                                                                                                              |               |       |              |          |       |  |                                 |  |  |               |              |              |               |              |               |          |             |  |             |  |  |  |                                  |          |               |                |              |               |                |              |          |                |  |
| <b>CMT:</b>                     |                                                                                                             |               |                                                                                                                                                                                                                                                                                                                                                                                                                                                                                                                                                                                                                                                                                                                                                                                                                              |               |       |              |          |       |  |                                 |  |  |               |              |              |               |              |               |          |             |  |             |  |  |  |                                  |          |               |                |              |               |                |              |          |                |  |
|                                 | <b>Mean change from baseline</b>                                                                            | <b>p</b>      |                                                                                                                                                                                                                                                                                                                                                                                                                                                                                                                                                                                                                                                                                                                                                                                                                              |               |       |              |          |       |  |                                 |  |  |               |              |              |               |              |               |          |             |  |             |  |  |  |                                  |          |               |                |              |               |                |              |          |                |  |
| <b>IVR0.3</b>                   | -259.8 SD169.3                                                                                              | <0.0001 vs C  |                                                                                                                                                                                                                                                                                                                                                                                                                                                                                                                                                                                                                                                                                                                                                                                                                              |               |       |              |          |       |  |                                 |  |  |               |              |              |               |              |               |          |             |  |             |  |  |  |                                  |          |               |                |              |               |                |              |          |                |  |
| <b>IVR0.5</b>                   | -270.7 SD201.6                                                                                              | <0.0001 vs C  |                                                                                                                                                                                                                                                                                                                                                                                                                                                                                                                                                                                                                                                                                                                                                                                                                              |               |       |              |          |       |  |                                 |  |  |               |              |              |               |              |               |          |             |  |             |  |  |  |                                  |          |               |                |              |               |                |              |          |                |  |
| <b>C</b>                        | -125.8 SD198.3                                                                                              |               |                                                                                                                                                                                                                                                                                                                                                                                                                                                                                                                                                                                                                                                                                                                                                                                                                              |               |       |              |          |       |  |                                 |  |  |               |              |              |               |              |               |          |             |  |             |  |  |  |                                  |          |               |                |              |               |                |              |          |                |  |

**Abbreviations:** BCVA – best corrected visual acuity, CMT – central macular thickness, DM – diabetes mellitus, DMO – diabetic macular oedema, DP – diastolic pressure, DR – diabetic retinopathy, HR QoL – health-related quality of life, IOP – intraocular pressure, IQR – interquartile range, IV – intravitreal, NEI VFQ-25 – National Eye Institute Visual Function Questionnaire-25, NPDR – nonproliferative diabetic retinopathy, NR – not reported, OCT – optical coherence tomography, PDR – proliferative diabetic retinopathy, PRP – panretinal photocoagulation, RCT – randomized controlled trial, SD – standard deviation, SP – systolic pressure, VA – visual acuity, VEGF – vascular endothelial growth factor, vs – versus, CSME – clinically significant macular oedema, MLT/MPC – macular laser therapy/macular photocoagulation, IVR – intravitreal ranibizumab, IVB – intravitreal bevacizumab, IVP – intravitreal pegaptanib, IVVTE – intravitreal VEGF Trap Eye, C - control, DIL - dexamethasone followed by laser, DDS - dexamethasone, SRFA – fluocinolone, SOC – standard of care, IVT - intravitreal triamcinolone, L – laser, IVTL intravitreal triamcinolone plus laser **Notes:** injections are intravitreal unless otherwise noted

1  
2  
3  
4  
5  
6  
7  
8  
9  
10  
11  
12  
13  
14  
15  
16  
17  
18  
19  
20  
21  
22  
23  
24  
25  
26  
27  
28  
29  
30  
31  
32  
33  
34  
35  
36  
37  
38  
39  
40  
41  
42  
43  
44  
45  
46  
47  
48  
49

**Table 34: Bevacizumab studies**

| Study                                                                                                                                                    | Participants and baseline values                                                                                                                                                                                                                                                                                                                                                                                                                                                                                                                                                                                                                                                                                                                                                                                                                                                                                                                                                                                                                                                                                                                                                                                                                                                                                                                                                                                                                                                                                                                                                                                                                                                                                                                                                                      | Intervention                                                                                                                                                                                                                                                                                                                                                                                                                                                                                                         | Outcome (change from baseline at study end)                                                                                                                                                                                                                                                                                                                                                                                                                                                                                                                                                                                                                                                                                                                                                                                                                                                                                                                                |  |                |   |            |             |  |            |            |              |  |                |               |   |            |    |    |  |            |     |     |                              |  |                     |   |            |            |  |            |            |             |
|----------------------------------------------------------------------------------------------------------------------------------------------------------|-------------------------------------------------------------------------------------------------------------------------------------------------------------------------------------------------------------------------------------------------------------------------------------------------------------------------------------------------------------------------------------------------------------------------------------------------------------------------------------------------------------------------------------------------------------------------------------------------------------------------------------------------------------------------------------------------------------------------------------------------------------------------------------------------------------------------------------------------------------------------------------------------------------------------------------------------------------------------------------------------------------------------------------------------------------------------------------------------------------------------------------------------------------------------------------------------------------------------------------------------------------------------------------------------------------------------------------------------------------------------------------------------------------------------------------------------------------------------------------------------------------------------------------------------------------------------------------------------------------------------------------------------------------------------------------------------------------------------------------------------------------------------------------------------------|----------------------------------------------------------------------------------------------------------------------------------------------------------------------------------------------------------------------------------------------------------------------------------------------------------------------------------------------------------------------------------------------------------------------------------------------------------------------------------------------------------------------|----------------------------------------------------------------------------------------------------------------------------------------------------------------------------------------------------------------------------------------------------------------------------------------------------------------------------------------------------------------------------------------------------------------------------------------------------------------------------------------------------------------------------------------------------------------------------------------------------------------------------------------------------------------------------------------------------------------------------------------------------------------------------------------------------------------------------------------------------------------------------------------------------------------------------------------------------------------------------|--|----------------|---|------------|-------------|--|------------|------------|--------------|--|----------------|---------------|---|------------|----|----|--|------------|-----|-----|------------------------------|--|---------------------|---|------------|------------|--|------------|------------|-------------|
| <p><b>BOLT Study (Michaelides 2010/ Rajendram 2012)</b><br/>[23,52,85]<br/><b>UK</b></p> <p><b>Design:</b> 2-arm RCT<br/><b>Follow-up:</b> 12 months</p> | <p><b>N:</b> 80 eyes of 80 patients</p> <p><b>Inclusion criteria:</b> ≥18 years, type 1 or 2 DM, BCVA in the study eye 35 to 69 ETDRS letters at 4 m (≥6/60 or ≤6/12), center-involving clinically significant DMO with CMT ≥270 μm; media clarity, papillary dilation and cooperation sufficient for adequate fundus imaging; a least 1 prior macular laser therapy; IOP &lt;30 mmHg; fellow eye BCVA ≥3/60; fellow eye received no anti-VEGF in past 3 months and no expectation of such therapy</p> <p><b>Exclusion criteria:</b> (ocular for study eye) macular ischemia, macular oedema due to causes other than DMO, coexistent ocular disease affecting VA or DMO, any treatment for DMO in prior 3 months, PRP within 3 months prior to randomization or anticipated, PDR, HbA1c &gt;11.0%, medical history of chronic renal failure; any thromboembolic event within 6 months prior to randomization, unstable angina, evidence of active ischemia on ECG; major surgery within 28 days of randomization or planned; participation in an investigational drug trial; systemic anti-VEGF or pro-VEGF treatment within 3 months of enrollment; pregnancy, lactation; intraocular surgery within 3 months of randomization; aphakia; uncontrolled glaucoma; significant external ocular disease</p> <p><b>Age:</b> 64.2 SD8.8 years<br/><b>Sex:</b> 31% female<br/><b>Diabetes type:</b> 90% type 2 DM, 10% type 1 DM<br/><b>HbA1c:</b> 7.5 to 7.6 SD1.2 to 1.4%<br/><b>Baseline VA:</b> ETDRS letter score 54.6 to 55.7 SD8.6 to 9.7<br/><b>Baseline CMT:</b> 481 to 507 SD121 to 145 μm<br/><b>Comorbidities:</b> 19% mild NPDR (level 35), 46% moderate NPDR (level 43), 19% moderately severe NPDR (level 47), 13% severe NPDR (level 53), 3% moderate PDR (level 65), 79 to 88% phakic</p> | <p><b>Group 1 (MLT, n=38 eyes):</b> modified ETDRS macular laser therapy; reviewed every 4 months up to 52 weeks; retreatment performed if clinically indicated by ETDRS guidelines (median 4 laser treatments)</p> <p><b>Group 2 (IVB, n=42 eyes):</b> 1.25 mg (0.05 ml) IV bevacizumab at baseline, 6 and 12 weeks; subsequent IVB injections (up to 52 weeks) guided by an OCT-based retreatment protocol (median 13 injections)</p> <p><b>Laser Modified ETDRS protocol, retreatment by ETDRS guidelines</b></p> | <p><b>At 24 months</b></p> <p><b>BCVA (ETDRS):</b></p> <table border="1"> <thead> <tr> <th></th> <th>BCVA.mean (SD)</th> <th>p</th> </tr> </thead> <tbody> <tr> <td><i>MLT</i></td> <td>-0.5 (10.6)</td> <td></td> </tr> <tr> <td><i>IVB</i></td> <td>+8.6 (9.1)</td> <td>0.005 vs MLT</td> </tr> </tbody> </table> <p><b>BCVA gain categories (letters)</b></p> <table border="1"> <thead> <tr> <th></th> <th>gaining ≥10: %</th> <th>losing &gt;15: %</th> <th>p</th> </tr> </thead> <tbody> <tr> <td><i>MLT</i></td> <td>7%</td> <td>4%</td> <td></td> </tr> <tr> <td><i>IVB</i></td> <td>49%</td> <td>32%</td> <td>0.001 vs MLT<br/>0.004 vs MLT</td> </tr> </tbody> </table> <p><b>CMT (OCT):</b></p> <table border="1"> <thead> <tr> <th></th> <th>CMT (μm, quartiles)</th> <th>p</th> </tr> </thead> <tbody> <tr> <td><i>MLT</i></td> <td>-118 SD171</td> <td></td> </tr> <tr> <td><i>IVB</i></td> <td>-146 SD122</td> <td>0.62 vs MLT</td> </tr> </tbody> </table> |  | BCVA.mean (SD) | p | <i>MLT</i> | -0.5 (10.6) |  | <i>IVB</i> | +8.6 (9.1) | 0.005 vs MLT |  | gaining ≥10: % | losing >15: % | p | <i>MLT</i> | 7% | 4% |  | <i>IVB</i> | 49% | 32% | 0.001 vs MLT<br>0.004 vs MLT |  | CMT (μm, quartiles) | p | <i>MLT</i> | -118 SD171 |  | <i>IVB</i> | -146 SD122 | 0.62 vs MLT |
|                                                                                                                                                          | BCVA.mean (SD)                                                                                                                                                                                                                                                                                                                                                                                                                                                                                                                                                                                                                                                                                                                                                                                                                                                                                                                                                                                                                                                                                                                                                                                                                                                                                                                                                                                                                                                                                                                                                                                                                                                                                                                                                                                        | p                                                                                                                                                                                                                                                                                                                                                                                                                                                                                                                    |                                                                                                                                                                                                                                                                                                                                                                                                                                                                                                                                                                                                                                                                                                                                                                                                                                                                                                                                                                            |  |                |   |            |             |  |            |            |              |  |                |               |   |            |    |    |  |            |     |     |                              |  |                     |   |            |            |  |            |            |             |
| <i>MLT</i>                                                                                                                                               | -0.5 (10.6)                                                                                                                                                                                                                                                                                                                                                                                                                                                                                                                                                                                                                                                                                                                                                                                                                                                                                                                                                                                                                                                                                                                                                                                                                                                                                                                                                                                                                                                                                                                                                                                                                                                                                                                                                                                           |                                                                                                                                                                                                                                                                                                                                                                                                                                                                                                                      |                                                                                                                                                                                                                                                                                                                                                                                                                                                                                                                                                                                                                                                                                                                                                                                                                                                                                                                                                                            |  |                |   |            |             |  |            |            |              |  |                |               |   |            |    |    |  |            |     |     |                              |  |                     |   |            |            |  |            |            |             |
| <i>IVB</i>                                                                                                                                               | +8.6 (9.1)                                                                                                                                                                                                                                                                                                                                                                                                                                                                                                                                                                                                                                                                                                                                                                                                                                                                                                                                                                                                                                                                                                                                                                                                                                                                                                                                                                                                                                                                                                                                                                                                                                                                                                                                                                                            | 0.005 vs MLT                                                                                                                                                                                                                                                                                                                                                                                                                                                                                                         |                                                                                                                                                                                                                                                                                                                                                                                                                                                                                                                                                                                                                                                                                                                                                                                                                                                                                                                                                                            |  |                |   |            |             |  |            |            |              |  |                |               |   |            |    |    |  |            |     |     |                              |  |                     |   |            |            |  |            |            |             |
|                                                                                                                                                          | gaining ≥10: %                                                                                                                                                                                                                                                                                                                                                                                                                                                                                                                                                                                                                                                                                                                                                                                                                                                                                                                                                                                                                                                                                                                                                                                                                                                                                                                                                                                                                                                                                                                                                                                                                                                                                                                                                                                        | losing >15: %                                                                                                                                                                                                                                                                                                                                                                                                                                                                                                        | p                                                                                                                                                                                                                                                                                                                                                                                                                                                                                                                                                                                                                                                                                                                                                                                                                                                                                                                                                                          |  |                |   |            |             |  |            |            |              |  |                |               |   |            |    |    |  |            |     |     |                              |  |                     |   |            |            |  |            |            |             |
| <i>MLT</i>                                                                                                                                               | 7%                                                                                                                                                                                                                                                                                                                                                                                                                                                                                                                                                                                                                                                                                                                                                                                                                                                                                                                                                                                                                                                                                                                                                                                                                                                                                                                                                                                                                                                                                                                                                                                                                                                                                                                                                                                                    | 4%                                                                                                                                                                                                                                                                                                                                                                                                                                                                                                                   |                                                                                                                                                                                                                                                                                                                                                                                                                                                                                                                                                                                                                                                                                                                                                                                                                                                                                                                                                                            |  |                |   |            |             |  |            |            |              |  |                |               |   |            |    |    |  |            |     |     |                              |  |                     |   |            |            |  |            |            |             |
| <i>IVB</i>                                                                                                                                               | 49%                                                                                                                                                                                                                                                                                                                                                                                                                                                                                                                                                                                                                                                                                                                                                                                                                                                                                                                                                                                                                                                                                                                                                                                                                                                                                                                                                                                                                                                                                                                                                                                                                                                                                                                                                                                                   | 32%                                                                                                                                                                                                                                                                                                                                                                                                                                                                                                                  | 0.001 vs MLT<br>0.004 vs MLT                                                                                                                                                                                                                                                                                                                                                                                                                                                                                                                                                                                                                                                                                                                                                                                                                                                                                                                                               |  |                |   |            |             |  |            |            |              |  |                |               |   |            |    |    |  |            |     |     |                              |  |                     |   |            |            |  |            |            |             |
|                                                                                                                                                          | CMT (μm, quartiles)                                                                                                                                                                                                                                                                                                                                                                                                                                                                                                                                                                                                                                                                                                                                                                                                                                                                                                                                                                                                                                                                                                                                                                                                                                                                                                                                                                                                                                                                                                                                                                                                                                                                                                                                                                                   | p                                                                                                                                                                                                                                                                                                                                                                                                                                                                                                                    |                                                                                                                                                                                                                                                                                                                                                                                                                                                                                                                                                                                                                                                                                                                                                                                                                                                                                                                                                                            |  |                |   |            |             |  |            |            |              |  |                |               |   |            |    |    |  |            |     |     |                              |  |                     |   |            |            |  |            |            |             |
| <i>MLT</i>                                                                                                                                               | -118 SD171                                                                                                                                                                                                                                                                                                                                                                                                                                                                                                                                                                                                                                                                                                                                                                                                                                                                                                                                                                                                                                                                                                                                                                                                                                                                                                                                                                                                                                                                                                                                                                                                                                                                                                                                                                                            |                                                                                                                                                                                                                                                                                                                                                                                                                                                                                                                      |                                                                                                                                                                                                                                                                                                                                                                                                                                                                                                                                                                                                                                                                                                                                                                                                                                                                                                                                                                            |  |                |   |            |             |  |            |            |              |  |                |               |   |            |    |    |  |            |     |     |                              |  |                     |   |            |            |  |            |            |             |
| <i>IVB</i>                                                                                                                                               | -146 SD122                                                                                                                                                                                                                                                                                                                                                                                                                                                                                                                                                                                                                                                                                                                                                                                                                                                                                                                                                                                                                                                                                                                                                                                                                                                                                                                                                                                                                                                                                                                                                                                                                                                                                                                                                                                            | 0.62 vs MLT                                                                                                                                                                                                                                                                                                                                                                                                                                                                                                          |                                                                                                                                                                                                                                                                                                                                                                                                                                                                                                                                                                                                                                                                                                                                                                                                                                                                                                                                                                            |  |                |   |            |             |  |            |            |              |  |                |               |   |            |    |    |  |            |     |     |                              |  |                     |   |            |            |  |            |            |             |

| Study                                                                                                          | Participants and baseline values                                                                                                                                                                                                                                                                                                                                                                                                                                                                                                                                                                                                                                                                                                                                                                                                                                                                                                                                                                                                                               | Intervention                                                                                                                                                                                                                                                                                                                                        | Outcome (change from baseline at study end)                                                                                                                                                                                                                                                                                                                                                                                                                                                                                                                                                                                                                                                                                                                                                                                                                                                                                                                                                                                                         |  |               |   |                |                            |                                 |                |                            |                   |  |          |   |                |     |                                 |                |     |                   |
|----------------------------------------------------------------------------------------------------------------|----------------------------------------------------------------------------------------------------------------------------------------------------------------------------------------------------------------------------------------------------------------------------------------------------------------------------------------------------------------------------------------------------------------------------------------------------------------------------------------------------------------------------------------------------------------------------------------------------------------------------------------------------------------------------------------------------------------------------------------------------------------------------------------------------------------------------------------------------------------------------------------------------------------------------------------------------------------------------------------------------------------------------------------------------------------|-----------------------------------------------------------------------------------------------------------------------------------------------------------------------------------------------------------------------------------------------------------------------------------------------------------------------------------------------------|-----------------------------------------------------------------------------------------------------------------------------------------------------------------------------------------------------------------------------------------------------------------------------------------------------------------------------------------------------------------------------------------------------------------------------------------------------------------------------------------------------------------------------------------------------------------------------------------------------------------------------------------------------------------------------------------------------------------------------------------------------------------------------------------------------------------------------------------------------------------------------------------------------------------------------------------------------------------------------------------------------------------------------------------------------|--|---------------|---|----------------|----------------------------|---------------------------------|----------------|----------------------------|-------------------|--|----------|---|----------------|-----|---------------------------------|----------------|-----|-------------------|
| <p><b>Lam 2009</b>[35]<br/><b>Hong Kong</b></p> <p><b>Design:</b> 2-arm RCT<br/><b>Follow-up:</b> 6 months</p> | <p><b>N:</b> 52 eyes of 52 patients<br/><b>Inclusion criteria:</b> ≥18 years, type 1 or 2 DM, clinically significant DMO (slit-lamp biomicroscopy, ETDRS criteria; leakage confirmed by fluorescein angiography, CMT ≥250 μm on OCT), BCVA ≥1.3 ETDRS logMAR units; only patients with diffuse DMO recruited<br/><b>Exclusion criteria:</b> macular oedema due to reasons other than diabetes, significant media opacities, macular ischemia of ≥1 disk area, vitreomacular traction, PDR, aphakia, glaucoma or ocular hypertension, previous anti-VEGF treatment, intraocular surgery except uncomplicated cataract extraction (but &gt; 6 months prior), focal DMO, any laser procedure within previous 4 months, subtenon or intravitreal triamcinolone injection within 6 months, pregnancy.<br/><b>Age:</b> 65.3 SD8.9 years<br/><b>Sex:</b> 46.2% female<br/><b>Diabetes type:</b> not reported<br/><b>HbA1c:</b> 7.5 SD1.0%<br/><b>Baseline VA:</b> 0.61 SD0.29 logMAR<br/><b>Baseline CMT:</b> 466 SD127 μm<br/><b>Comorbidities:</b> not reported</p> | <p><b>Group 1 (IVB1.25, n=26 eyes):</b> 1.25 mg bevacizumab (0.05 ml)<br/><b>Group 2 (IVB2.5, n=26 eyes):</b> 2.5 mg bevacizumab (0.1 ml)<br/><b>Regimen for all groups:</b> 3 monthly IV injections, topical 0.5% levofloxacin 4x/day for up to 2 weeks after each injection</p>                                                                   | <p><b>At 6 months</b><br/><b>BCVA (ETDRS chart):</b></p> <table border="1"> <thead> <tr> <th></th> <th>BCVA (logMAR)</th> <th>p</th> </tr> </thead> <tbody> <tr> <td><i>IVB1.25</i></td> <td>0.11 SD0.31 [+5.5 letters]</td> <td>0.018 vs baseline, NS vs IVB2.5</td> </tr> <tr> <td><i>IVB2.5</i></td> <td>0.13 SD0.26 [+6.5 letters]</td> <td>0.003 vs baseline</td> </tr> </tbody> </table> <p><b>CMT (OCT):</b></p> <table border="1"> <thead> <tr> <th></th> <th>CMT (μm)</th> <th>p</th> </tr> </thead> <tbody> <tr> <td><i>IVB1.25</i></td> <td>96</td> <td>0.002 vs baseline, NS vs IVB2.5</td> </tr> <tr> <td><i>IVB2.5</i></td> <td>74</td> <td>0.013 vs baseline</td> </tr> </tbody> </table> <p>Subgroups:</p> <ul style="list-style-type: none"> <li>For patients with previous DMO treatment (mainly laser): no significant reduction in CMT at 6 months (452 μm at baseline to 416 μm at 6 months, p=0.22); no significant improvement in BCVA (0.66 logMAR at baseline to 0.56 logMAR at 6 months [+5 letters], p=0.074)</li> </ul> |  | BCVA (logMAR) | p | <i>IVB1.25</i> | 0.11 SD0.31 [+5.5 letters] | 0.018 vs baseline, NS vs IVB2.5 | <i>IVB2.5</i>  | 0.13 SD0.26 [+6.5 letters] | 0.003 vs baseline |  | CMT (μm) | p | <i>IVB1.25</i> | 96  | 0.002 vs baseline, NS vs IVB2.5 | <i>IVB2.5</i>  | 74  | 0.013 vs baseline |
|                                                                                                                | BCVA (logMAR)                                                                                                                                                                                                                                                                                                                                                                                                                                                                                                                                                                                                                                                                                                                                                                                                                                                                                                                                                                                                                                                  | p                                                                                                                                                                                                                                                                                                                                                   |                                                                                                                                                                                                                                                                                                                                                                                                                                                                                                                                                                                                                                                                                                                                                                                                                                                                                                                                                                                                                                                     |  |               |   |                |                            |                                 |                |                            |                   |  |          |   |                |     |                                 |                |     |                   |
| <i>IVB1.25</i>                                                                                                 | 0.11 SD0.31 [+5.5 letters]                                                                                                                                                                                                                                                                                                                                                                                                                                                                                                                                                                                                                                                                                                                                                                                                                                                                                                                                                                                                                                     | 0.018 vs baseline, NS vs IVB2.5                                                                                                                                                                                                                                                                                                                     |                                                                                                                                                                                                                                                                                                                                                                                                                                                                                                                                                                                                                                                                                                                                                                                                                                                                                                                                                                                                                                                     |  |               |   |                |                            |                                 |                |                            |                   |  |          |   |                |     |                                 |                |     |                   |
| <i>IVB2.5</i>                                                                                                  | 0.13 SD0.26 [+6.5 letters]                                                                                                                                                                                                                                                                                                                                                                                                                                                                                                                                                                                                                                                                                                                                                                                                                                                                                                                                                                                                                                     | 0.003 vs baseline                                                                                                                                                                                                                                                                                                                                   |                                                                                                                                                                                                                                                                                                                                                                                                                                                                                                                                                                                                                                                                                                                                                                                                                                                                                                                                                                                                                                                     |  |               |   |                |                            |                                 |                |                            |                   |  |          |   |                |     |                                 |                |     |                   |
|                                                                                                                | CMT (μm)                                                                                                                                                                                                                                                                                                                                                                                                                                                                                                                                                                                                                                                                                                                                                                                                                                                                                                                                                                                                                                                       | p                                                                                                                                                                                                                                                                                                                                                   |                                                                                                                                                                                                                                                                                                                                                                                                                                                                                                                                                                                                                                                                                                                                                                                                                                                                                                                                                                                                                                                     |  |               |   |                |                            |                                 |                |                            |                   |  |          |   |                |     |                                 |                |     |                   |
| <i>IVB1.25</i>                                                                                                 | 96                                                                                                                                                                                                                                                                                                                                                                                                                                                                                                                                                                                                                                                                                                                                                                                                                                                                                                                                                                                                                                                             | 0.002 vs baseline, NS vs IVB2.5                                                                                                                                                                                                                                                                                                                     |                                                                                                                                                                                                                                                                                                                                                                                                                                                                                                                                                                                                                                                                                                                                                                                                                                                                                                                                                                                                                                                     |  |               |   |                |                            |                                 |                |                            |                   |  |          |   |                |     |                                 |                |     |                   |
| <i>IVB2.5</i>                                                                                                  | 74                                                                                                                                                                                                                                                                                                                                                                                                                                                                                                                                                                                                                                                                                                                                                                                                                                                                                                                                                                                                                                                             | 0.013 vs baseline                                                                                                                                                                                                                                                                                                                                   |                                                                                                                                                                                                                                                                                                                                                                                                                                                                                                                                                                                                                                                                                                                                                                                                                                                                                                                                                                                                                                                     |  |               |   |                |                            |                                 |                |                            |                   |  |          |   |                |     |                                 |                |     |                   |
| <p><b>Faghihi 2010</b>[53]<br/><b>Iran</b></p> <p><b>Design:</b> 2-arm RCT<br/><b>Follow-up:</b> 6 months</p>  | <p><b>N:</b> 80 eyes of 40 patients<br/><b>Inclusion criteria:</b> Bilateral non-tractional CSME, 10/10&gt; V.A≥ 1/10, Controlled blood pressure.<br/><b>Exclusion criteria:</b> Advanced or advanced active PDR, Significant cataract, Glaucoma, History of recent vascular accident (e.g, MI, CVA), Previous treatment of CSME or PDR, or pharmacotherapy for CSME, macular ischemia and uncontrolled hypertension.<br/><b>Age:</b> 57.7±8 years.<br/><b>Sex:</b> 27.5% females<br/><b>Diabetes type:</b> NR<br/><b>HbA1c:</b> 8.42±1.82 g/dl<br/><b>Baseline VA:</b> 0.326 to 0.409 (SD 0.279 to 0.332)<br/><b>Baseline CMT:</b> 277 μm to 287 μm (SD 78 to 98)<br/><b>Comorbidities:</b> not reported</p>                                                                                                                                                                                                                                                                                                                                                  | <p><b>Group 1 (IVB, n= 40 eyes):</b> 1.25mg bevacizumab<br/><b>Group 2 (IVB+MPC, n= 40 eyes):</b> 1.25mg bevacizumab<br/><b>Regimen for all groups:</b> Eyes examined every two months and if evidence of CSME IVB was injected. mean of the number of IVB injections in IVB group and IVB+MPC group were 2.23±1.24 and 2.49±1.09 respectively.</p> | <p><b>At 6 months</b><br/><b>Mean change in BCVA (ETDRS chart):</b></p> <table border="1"> <thead> <tr> <th></th> <th>BCVA (logMAR)</th> <th>p</th> </tr> </thead> <tbody> <tr> <td><i>IVB</i></td> <td>0.138</td> <td>&lt;0.05 vs baseline</td> </tr> <tr> <td><i>IVB+MPC</i></td> <td>0.179</td> <td>&lt;0.05 vs baseline</td> </tr> </tbody> </table> <ul style="list-style-type: none"> <li>no statistically significant difference between the two groups</li> </ul> <p><b>CMT (OCT):</b></p> <table border="1"> <thead> <tr> <th></th> <th>CMT (μm)</th> <th>p</th> </tr> </thead> <tbody> <tr> <td><i>IVB</i></td> <td>-39</td> <td>&lt;0.05 vs baseline</td> </tr> <tr> <td><i>IVB+MPC</i></td> <td>-39</td> <td>&lt;0.05 vs baseline</td> </tr> </tbody> </table> <ul style="list-style-type: none"> <li>no statistically significant difference between the two groups</li> </ul>                                                                                                                                                         |  | BCVA (logMAR) | p | <i>IVB</i>     | 0.138                      | <0.05 vs baseline               | <i>IVB+MPC</i> | 0.179                      | <0.05 vs baseline |  | CMT (μm) | p | <i>IVB</i>     | -39 | <0.05 vs baseline               | <i>IVB+MPC</i> | -39 | <0.05 vs baseline |
|                                                                                                                | BCVA (logMAR)                                                                                                                                                                                                                                                                                                                                                                                                                                                                                                                                                                                                                                                                                                                                                                                                                                                                                                                                                                                                                                                  | p                                                                                                                                                                                                                                                                                                                                                   |                                                                                                                                                                                                                                                                                                                                                                                                                                                                                                                                                                                                                                                                                                                                                                                                                                                                                                                                                                                                                                                     |  |               |   |                |                            |                                 |                |                            |                   |  |          |   |                |     |                                 |                |     |                   |
| <i>IVB</i>                                                                                                     | 0.138                                                                                                                                                                                                                                                                                                                                                                                                                                                                                                                                                                                                                                                                                                                                                                                                                                                                                                                                                                                                                                                          | <0.05 vs baseline                                                                                                                                                                                                                                                                                                                                   |                                                                                                                                                                                                                                                                                                                                                                                                                                                                                                                                                                                                                                                                                                                                                                                                                                                                                                                                                                                                                                                     |  |               |   |                |                            |                                 |                |                            |                   |  |          |   |                |     |                                 |                |     |                   |
| <i>IVB+MPC</i>                                                                                                 | 0.179                                                                                                                                                                                                                                                                                                                                                                                                                                                                                                                                                                                                                                                                                                                                                                                                                                                                                                                                                                                                                                                          | <0.05 vs baseline                                                                                                                                                                                                                                                                                                                                   |                                                                                                                                                                                                                                                                                                                                                                                                                                                                                                                                                                                                                                                                                                                                                                                                                                                                                                                                                                                                                                                     |  |               |   |                |                            |                                 |                |                            |                   |  |          |   |                |     |                                 |                |     |                   |
|                                                                                                                | CMT (μm)                                                                                                                                                                                                                                                                                                                                                                                                                                                                                                                                                                                                                                                                                                                                                                                                                                                                                                                                                                                                                                                       | p                                                                                                                                                                                                                                                                                                                                                   |                                                                                                                                                                                                                                                                                                                                                                                                                                                                                                                                                                                                                                                                                                                                                                                                                                                                                                                                                                                                                                                     |  |               |   |                |                            |                                 |                |                            |                   |  |          |   |                |     |                                 |                |     |                   |
| <i>IVB</i>                                                                                                     | -39                                                                                                                                                                                                                                                                                                                                                                                                                                                                                                                                                                                                                                                                                                                                                                                                                                                                                                                                                                                                                                                            | <0.05 vs baseline                                                                                                                                                                                                                                                                                                                                   |                                                                                                                                                                                                                                                                                                                                                                                                                                                                                                                                                                                                                                                                                                                                                                                                                                                                                                                                                                                                                                                     |  |               |   |                |                            |                                 |                |                            |                   |  |          |   |                |     |                                 |                |     |                   |
| <i>IVB+MPC</i>                                                                                                 | -39                                                                                                                                                                                                                                                                                                                                                                                                                                                                                                                                                                                                                                                                                                                                                                                                                                                                                                                                                                                                                                                            | <0.05 vs baseline                                                                                                                                                                                                                                                                                                                                   |                                                                                                                                                                                                                                                                                                                                                                                                                                                                                                                                                                                                                                                                                                                                                                                                                                                                                                                                                                                                                                                     |  |               |   |                |                            |                                 |                |                            |                   |  |          |   |                |     |                                 |                |     |                   |

Abbreviations: See table 2

Table 45: Pegaptanib and aflibercept studies

| Study                                                                                                                      | Participants and baseline values                                                                                                                                                                                                                                                                                                                                                                                                                                                                                                                                                                                                                                                                                                                                                                                                                                                                                                                                                                                                                                                                                                                                                                                                                                                                                                                                                                                                                                                                                                                                                                                    | Intervention                                                                                                                                                                                                                                                                                                                                                                                                                                                                                                                                                                                                                                                                                                                                                                                                      | Outcome (change from baseline at study end)                                                                                                                                                                                                                                                                                                                                                                                                                                                                                                                                                                                                                                                                                                                                                                                                                                                                                                                                                                                                                                                                                                                                                                                                                                                                                         |  |                |   |               |      |            |             |      |           |             |      |         |          |      |  |               |     |            |             |     |  |             |     |  |          |     |  |  |                  |   |               |                         |           |             |                        |         |             |                       |         |          |      |  |
|----------------------------------------------------------------------------------------------------------------------------|---------------------------------------------------------------------------------------------------------------------------------------------------------------------------------------------------------------------------------------------------------------------------------------------------------------------------------------------------------------------------------------------------------------------------------------------------------------------------------------------------------------------------------------------------------------------------------------------------------------------------------------------------------------------------------------------------------------------------------------------------------------------------------------------------------------------------------------------------------------------------------------------------------------------------------------------------------------------------------------------------------------------------------------------------------------------------------------------------------------------------------------------------------------------------------------------------------------------------------------------------------------------------------------------------------------------------------------------------------------------------------------------------------------------------------------------------------------------------------------------------------------------------------------------------------------------------------------------------------------------|-------------------------------------------------------------------------------------------------------------------------------------------------------------------------------------------------------------------------------------------------------------------------------------------------------------------------------------------------------------------------------------------------------------------------------------------------------------------------------------------------------------------------------------------------------------------------------------------------------------------------------------------------------------------------------------------------------------------------------------------------------------------------------------------------------------------|-------------------------------------------------------------------------------------------------------------------------------------------------------------------------------------------------------------------------------------------------------------------------------------------------------------------------------------------------------------------------------------------------------------------------------------------------------------------------------------------------------------------------------------------------------------------------------------------------------------------------------------------------------------------------------------------------------------------------------------------------------------------------------------------------------------------------------------------------------------------------------------------------------------------------------------------------------------------------------------------------------------------------------------------------------------------------------------------------------------------------------------------------------------------------------------------------------------------------------------------------------------------------------------------------------------------------------------|--|----------------|---|---------------|------|------------|-------------|------|-----------|-------------|------|---------|----------|------|--|---------------|-----|------------|-------------|-----|--|-------------|-----|--|----------|-----|--|--|------------------|---|---------------|-------------------------|-----------|-------------|------------------------|---------|-------------|-----------------------|---------|----------|------|--|
| <i>Pegaptanib</i>                                                                                                          |                                                                                                                                                                                                                                                                                                                                                                                                                                                                                                                                                                                                                                                                                                                                                                                                                                                                                                                                                                                                                                                                                                                                                                                                                                                                                                                                                                                                                                                                                                                                                                                                                     |                                                                                                                                                                                                                                                                                                                                                                                                                                                                                                                                                                                                                                                                                                                                                                                                                   |                                                                                                                                                                                                                                                                                                                                                                                                                                                                                                                                                                                                                                                                                                                                                                                                                                                                                                                                                                                                                                                                                                                                                                                                                                                                                                                                     |  |                |   |               |      |            |             |      |           |             |      |         |          |      |  |               |     |            |             |     |  |             |     |  |          |     |  |  |                  |   |               |                         |           |             |                        |         |             |                       |         |          |      |  |
| <b>Cunningham 2005 / Adamis 2006</b> [39,57]<br>USA<br><br><b>Design:</b> 4-arm phase II RCT<br><b>Follow-up:</b> 36 weeks | N: 172 eyes of 172 patients<br><b>Inclusion criteria:</b> ≥18 years, type 1 or 2 DM, DMO involving the center of the macula with corresponding leakage from microaneurysms, retinal telangiectasis, or both; clear ocular media, BCVA letter scores between 68 and 25 in the study eye and at least 35 in the fellow eye; IOP ≤23 mmHg, focal photocoagulation could be safely deferred for 16 weeks; no ECG abnormalities, no major serological abnormalities<br><b>Exclusion criteria:</b> history of panretinal or focal photocoagulation; neodymium:yttrium–aluminum–garnet laser or peripheral retinal cryoablation in previous 6 months; any ocular abnormality interfering with VA assessment or fundus photography; vitreoretinal traction; vitreous incarceration; retinal vein occlusion involving the macula; atrophy/scarring/fibrosis or hard exudates involving the center of the macula; history of intraocular surgery within previous 12 months, myopia of ≥8 diopters, axial length of ≥25mm, likelihood of requiring panretinal photocoagulation within following 9 months; cataract surgery within 12 months; active ocular or periocular infection; previous therapeutic radiation to the eye, head, or neck; known serious allergies to fluorescein dye; HbA1c ≥13%, pregnancy<br><b>Age:</b> 61.3 to 64.0 SD9.3 to 10.1 years<br><b>Sex:</b> 45 to 55% female<br><b>Diabetes type:</b> 5 to 10% IDDM<br><b>HbA1c:</b> 7.1 to 7.7 SD1.2 to 1.6<br><b>Baseline VA:</b> letter score 55.0 to 57.1 SD9.1 to 11.5<br><b>Baseline CMT:</b> 423.2 to 476.0 μm<br><b>Comorbidities:</b> not reported | <b>Group 1 (IVP0.3, n=44 eyes):</b> 0.3 mg IV pegaptanib (90 μl) (median 5 injections (range 1 to 6))<br><b>Group 2 (IVP1, n=44 eyes):</b> 1 mg IV pegaptanib (90 μl) (median 6 injections (range 3 to 6))<br><b>Group 3 (IVP3, n=42 eyes):</b> 3 mg IV pegaptanib (90 μl) (median 6 injections (range 1 to 6))<br><b>Group 4 (C, n=42 eyes):</b> sham injection (median 5 injections (range 1 to 6))<br><b>Regimen for all groups:</b> injections at baseline, week 6 and week 12; thereafter, additional injections administered every 6 weeks at the discretion of the investigators if judged indicated (maximum of 6 injections up to week 30); laser photocoagulation allowed after week 13 if judged indicated by the study-masked ophthalmologist (25% for IVP0.3, 30% for IVP1, 40% for IVP3, 48% for C) | <b>At 36 weeks BCVA:</b> <table border="1"><thead><tr><th></th><th>BCVA (letters)</th><th>p</th></tr></thead><tbody><tr><td><i>IVP0.3</i></td><td>+4.7</td><td>0.04 vs C</td></tr><tr><td><i>IVP1</i></td><td>+4.7</td><td>0.05 vs C</td></tr><tr><td><i>IVP3</i></td><td>+1.1</td><td>NS vs C</td></tr><tr><td><i>C</i></td><td>-0.4</td><td></td></tr></tbody></table> <b>plus ≥10 letters</b> <table border="1"><tbody><tr><td><i>IVP0.3</i></td><td>34%</td><td>0.003 vs C</td></tr><tr><td><i>IVP1</i></td><td>30%</td><td></td></tr><tr><td><i>IVP3</i></td><td>14%</td><td></td></tr><tr><td><i>C</i></td><td>10%</td><td></td></tr></tbody></table> <b>CMT (OCT):</b> <table border="1"><thead><tr><th></th><th>CMT (μm, 95% CI)</th><th>p</th></tr></thead><tbody><tr><td><i>IVP0.3</i></td><td>-68.0 (-118.9 to -9.88)</td><td>0.02 vs C</td></tr><tr><td><i>IVP1</i></td><td>-22.7 (-76.9 to +33.8)</td><td>NS vs C</td></tr><tr><td><i>IVP3</i></td><td>-5.3 (-63.0 to +49.5)</td><td>NS vs C</td></tr><tr><td><i>C</i></td><td>+3.7</td><td></td></tr></tbody></table> Subgroups: <ul style="list-style-type: none"><li>of 16 participants with retinal neovascularization at baseline, 8 of 13 (62%) in the pegaptanib groups and 0 of 3 in the sham group had regression of neovascularization at 36 weeks</li></ul> |  | BCVA (letters) | p | <i>IVP0.3</i> | +4.7 | 0.04 vs C  | <i>IVP1</i> | +4.7 | 0.05 vs C | <i>IVP3</i> | +1.1 | NS vs C | <i>C</i> | -0.4 |  | <i>IVP0.3</i> | 34% | 0.003 vs C | <i>IVP1</i> | 30% |  | <i>IVP3</i> | 14% |  | <i>C</i> | 10% |  |  | CMT (μm, 95% CI) | p | <i>IVP0.3</i> | -68.0 (-118.9 to -9.88) | 0.02 vs C | <i>IVP1</i> | -22.7 (-76.9 to +33.8) | NS vs C | <i>IVP3</i> | -5.3 (-63.0 to +49.5) | NS vs C | <i>C</i> | +3.7 |  |
|                                                                                                                            | BCVA (letters)                                                                                                                                                                                                                                                                                                                                                                                                                                                                                                                                                                                                                                                                                                                                                                                                                                                                                                                                                                                                                                                                                                                                                                                                                                                                                                                                                                                                                                                                                                                                                                                                      | p                                                                                                                                                                                                                                                                                                                                                                                                                                                                                                                                                                                                                                                                                                                                                                                                                 |                                                                                                                                                                                                                                                                                                                                                                                                                                                                                                                                                                                                                                                                                                                                                                                                                                                                                                                                                                                                                                                                                                                                                                                                                                                                                                                                     |  |                |   |               |      |            |             |      |           |             |      |         |          |      |  |               |     |            |             |     |  |             |     |  |          |     |  |  |                  |   |               |                         |           |             |                        |         |             |                       |         |          |      |  |
| <i>IVP0.3</i>                                                                                                              | +4.7                                                                                                                                                                                                                                                                                                                                                                                                                                                                                                                                                                                                                                                                                                                                                                                                                                                                                                                                                                                                                                                                                                                                                                                                                                                                                                                                                                                                                                                                                                                                                                                                                | 0.04 vs C                                                                                                                                                                                                                                                                                                                                                                                                                                                                                                                                                                                                                                                                                                                                                                                                         |                                                                                                                                                                                                                                                                                                                                                                                                                                                                                                                                                                                                                                                                                                                                                                                                                                                                                                                                                                                                                                                                                                                                                                                                                                                                                                                                     |  |                |   |               |      |            |             |      |           |             |      |         |          |      |  |               |     |            |             |     |  |             |     |  |          |     |  |  |                  |   |               |                         |           |             |                        |         |             |                       |         |          |      |  |
| <i>IVP1</i>                                                                                                                | +4.7                                                                                                                                                                                                                                                                                                                                                                                                                                                                                                                                                                                                                                                                                                                                                                                                                                                                                                                                                                                                                                                                                                                                                                                                                                                                                                                                                                                                                                                                                                                                                                                                                | 0.05 vs C                                                                                                                                                                                                                                                                                                                                                                                                                                                                                                                                                                                                                                                                                                                                                                                                         |                                                                                                                                                                                                                                                                                                                                                                                                                                                                                                                                                                                                                                                                                                                                                                                                                                                                                                                                                                                                                                                                                                                                                                                                                                                                                                                                     |  |                |   |               |      |            |             |      |           |             |      |         |          |      |  |               |     |            |             |     |  |             |     |  |          |     |  |  |                  |   |               |                         |           |             |                        |         |             |                       |         |          |      |  |
| <i>IVP3</i>                                                                                                                | +1.1                                                                                                                                                                                                                                                                                                                                                                                                                                                                                                                                                                                                                                                                                                                                                                                                                                                                                                                                                                                                                                                                                                                                                                                                                                                                                                                                                                                                                                                                                                                                                                                                                | NS vs C                                                                                                                                                                                                                                                                                                                                                                                                                                                                                                                                                                                                                                                                                                                                                                                                           |                                                                                                                                                                                                                                                                                                                                                                                                                                                                                                                                                                                                                                                                                                                                                                                                                                                                                                                                                                                                                                                                                                                                                                                                                                                                                                                                     |  |                |   |               |      |            |             |      |           |             |      |         |          |      |  |               |     |            |             |     |  |             |     |  |          |     |  |  |                  |   |               |                         |           |             |                        |         |             |                       |         |          |      |  |
| <i>C</i>                                                                                                                   | -0.4                                                                                                                                                                                                                                                                                                                                                                                                                                                                                                                                                                                                                                                                                                                                                                                                                                                                                                                                                                                                                                                                                                                                                                                                                                                                                                                                                                                                                                                                                                                                                                                                                |                                                                                                                                                                                                                                                                                                                                                                                                                                                                                                                                                                                                                                                                                                                                                                                                                   |                                                                                                                                                                                                                                                                                                                                                                                                                                                                                                                                                                                                                                                                                                                                                                                                                                                                                                                                                                                                                                                                                                                                                                                                                                                                                                                                     |  |                |   |               |      |            |             |      |           |             |      |         |          |      |  |               |     |            |             |     |  |             |     |  |          |     |  |  |                  |   |               |                         |           |             |                        |         |             |                       |         |          |      |  |
| <i>IVP0.3</i>                                                                                                              | 34%                                                                                                                                                                                                                                                                                                                                                                                                                                                                                                                                                                                                                                                                                                                                                                                                                                                                                                                                                                                                                                                                                                                                                                                                                                                                                                                                                                                                                                                                                                                                                                                                                 | 0.003 vs C                                                                                                                                                                                                                                                                                                                                                                                                                                                                                                                                                                                                                                                                                                                                                                                                        |                                                                                                                                                                                                                                                                                                                                                                                                                                                                                                                                                                                                                                                                                                                                                                                                                                                                                                                                                                                                                                                                                                                                                                                                                                                                                                                                     |  |                |   |               |      |            |             |      |           |             |      |         |          |      |  |               |     |            |             |     |  |             |     |  |          |     |  |  |                  |   |               |                         |           |             |                        |         |             |                       |         |          |      |  |
| <i>IVP1</i>                                                                                                                | 30%                                                                                                                                                                                                                                                                                                                                                                                                                                                                                                                                                                                                                                                                                                                                                                                                                                                                                                                                                                                                                                                                                                                                                                                                                                                                                                                                                                                                                                                                                                                                                                                                                 |                                                                                                                                                                                                                                                                                                                                                                                                                                                                                                                                                                                                                                                                                                                                                                                                                   |                                                                                                                                                                                                                                                                                                                                                                                                                                                                                                                                                                                                                                                                                                                                                                                                                                                                                                                                                                                                                                                                                                                                                                                                                                                                                                                                     |  |                |   |               |      |            |             |      |           |             |      |         |          |      |  |               |     |            |             |     |  |             |     |  |          |     |  |  |                  |   |               |                         |           |             |                        |         |             |                       |         |          |      |  |
| <i>IVP3</i>                                                                                                                | 14%                                                                                                                                                                                                                                                                                                                                                                                                                                                                                                                                                                                                                                                                                                                                                                                                                                                                                                                                                                                                                                                                                                                                                                                                                                                                                                                                                                                                                                                                                                                                                                                                                 |                                                                                                                                                                                                                                                                                                                                                                                                                                                                                                                                                                                                                                                                                                                                                                                                                   |                                                                                                                                                                                                                                                                                                                                                                                                                                                                                                                                                                                                                                                                                                                                                                                                                                                                                                                                                                                                                                                                                                                                                                                                                                                                                                                                     |  |                |   |               |      |            |             |      |           |             |      |         |          |      |  |               |     |            |             |     |  |             |     |  |          |     |  |  |                  |   |               |                         |           |             |                        |         |             |                       |         |          |      |  |
| <i>C</i>                                                                                                                   | 10%                                                                                                                                                                                                                                                                                                                                                                                                                                                                                                                                                                                                                                                                                                                                                                                                                                                                                                                                                                                                                                                                                                                                                                                                                                                                                                                                                                                                                                                                                                                                                                                                                 |                                                                                                                                                                                                                                                                                                                                                                                                                                                                                                                                                                                                                                                                                                                                                                                                                   |                                                                                                                                                                                                                                                                                                                                                                                                                                                                                                                                                                                                                                                                                                                                                                                                                                                                                                                                                                                                                                                                                                                                                                                                                                                                                                                                     |  |                |   |               |      |            |             |      |           |             |      |         |          |      |  |               |     |            |             |     |  |             |     |  |          |     |  |  |                  |   |               |                         |           |             |                        |         |             |                       |         |          |      |  |
|                                                                                                                            | CMT (μm, 95% CI)                                                                                                                                                                                                                                                                                                                                                                                                                                                                                                                                                                                                                                                                                                                                                                                                                                                                                                                                                                                                                                                                                                                                                                                                                                                                                                                                                                                                                                                                                                                                                                                                    | p                                                                                                                                                                                                                                                                                                                                                                                                                                                                                                                                                                                                                                                                                                                                                                                                                 |                                                                                                                                                                                                                                                                                                                                                                                                                                                                                                                                                                                                                                                                                                                                                                                                                                                                                                                                                                                                                                                                                                                                                                                                                                                                                                                                     |  |                |   |               |      |            |             |      |           |             |      |         |          |      |  |               |     |            |             |     |  |             |     |  |          |     |  |  |                  |   |               |                         |           |             |                        |         |             |                       |         |          |      |  |
| <i>IVP0.3</i>                                                                                                              | -68.0 (-118.9 to -9.88)                                                                                                                                                                                                                                                                                                                                                                                                                                                                                                                                                                                                                                                                                                                                                                                                                                                                                                                                                                                                                                                                                                                                                                                                                                                                                                                                                                                                                                                                                                                                                                                             | 0.02 vs C                                                                                                                                                                                                                                                                                                                                                                                                                                                                                                                                                                                                                                                                                                                                                                                                         |                                                                                                                                                                                                                                                                                                                                                                                                                                                                                                                                                                                                                                                                                                                                                                                                                                                                                                                                                                                                                                                                                                                                                                                                                                                                                                                                     |  |                |   |               |      |            |             |      |           |             |      |         |          |      |  |               |     |            |             |     |  |             |     |  |          |     |  |  |                  |   |               |                         |           |             |                        |         |             |                       |         |          |      |  |
| <i>IVP1</i>                                                                                                                | -22.7 (-76.9 to +33.8)                                                                                                                                                                                                                                                                                                                                                                                                                                                                                                                                                                                                                                                                                                                                                                                                                                                                                                                                                                                                                                                                                                                                                                                                                                                                                                                                                                                                                                                                                                                                                                                              | NS vs C                                                                                                                                                                                                                                                                                                                                                                                                                                                                                                                                                                                                                                                                                                                                                                                                           |                                                                                                                                                                                                                                                                                                                                                                                                                                                                                                                                                                                                                                                                                                                                                                                                                                                                                                                                                                                                                                                                                                                                                                                                                                                                                                                                     |  |                |   |               |      |            |             |      |           |             |      |         |          |      |  |               |     |            |             |     |  |             |     |  |          |     |  |  |                  |   |               |                         |           |             |                        |         |             |                       |         |          |      |  |
| <i>IVP3</i>                                                                                                                | -5.3 (-63.0 to +49.5)                                                                                                                                                                                                                                                                                                                                                                                                                                                                                                                                                                                                                                                                                                                                                                                                                                                                                                                                                                                                                                                                                                                                                                                                                                                                                                                                                                                                                                                                                                                                                                                               | NS vs C                                                                                                                                                                                                                                                                                                                                                                                                                                                                                                                                                                                                                                                                                                                                                                                                           |                                                                                                                                                                                                                                                                                                                                                                                                                                                                                                                                                                                                                                                                                                                                                                                                                                                                                                                                                                                                                                                                                                                                                                                                                                                                                                                                     |  |                |   |               |      |            |             |      |           |             |      |         |          |      |  |               |     |            |             |     |  |             |     |  |          |     |  |  |                  |   |               |                         |           |             |                        |         |             |                       |         |          |      |  |
| <i>C</i>                                                                                                                   | +3.7                                                                                                                                                                                                                                                                                                                                                                                                                                                                                                                                                                                                                                                                                                                                                                                                                                                                                                                                                                                                                                                                                                                                                                                                                                                                                                                                                                                                                                                                                                                                                                                                                |                                                                                                                                                                                                                                                                                                                                                                                                                                                                                                                                                                                                                                                                                                                                                                                                                   |                                                                                                                                                                                                                                                                                                                                                                                                                                                                                                                                                                                                                                                                                                                                                                                                                                                                                                                                                                                                                                                                                                                                                                                                                                                                                                                                     |  |                |   |               |      |            |             |      |           |             |      |         |          |      |  |               |     |            |             |     |  |             |     |  |          |     |  |  |                  |   |               |                         |           |             |                        |         |             |                       |         |          |      |  |
| <b>Sultan 2011</b> [40]<br>Multicenter international<br><br><b>Design:</b> 2-arm placebo-controlled RCT                    | N: 260 eyes of 260 patients<br><b>Inclusion criteria:</b> ≥18 years, type 1 or 2 DM, DMO involving the center of the macula not associated with ischemia, CMT ≥250 μm, BCVA letter score 65 to 35, IOP ≤21 mmHg, clear ocular media<br><b>Exclusion criteria:</b> any abnormality other than DMO affecting VA assessment, vitreomacular traction; yttrium-aluminum-garnet laser, peripheral retinal cryoablation, laser retinopexy for retinal tears, focal or                                                                                                                                                                                                                                                                                                                                                                                                                                                                                                                                                                                                                                                                                                                                                                                                                                                                                                                                                                                                                                                                                                                                                      | <b>Group 1 (IVP, n=133 eyes):</b> 0.3 mg IV pegaptanib sodium (mean number of injections 12.7 SD4.6)<br><b>Group 2 (C, n=127 eyes):</b> sham injection (mean number of injections 12.9 SD4.4)                                                                                                                                                                                                                                                                                                                                                                                                                                                                                                                                                                                                                     | <b>At 1 year BCVA (ETDRS):</b> <table border="1"><thead><tr><th></th><th>BCVA (letters)</th><th>p</th></tr></thead><tbody><tr><td><i>IVP</i></td><td>+5.2</td><td>&lt;0.05 vs C</td></tr><tr><td><i>C</i></td><td>+1.2</td><td></td></tr></tbody></table> <b>plus ≥10</b>                                                                                                                                                                                                                                                                                                                                                                                                                                                                                                                                                                                                                                                                                                                                                                                                                                                                                                                                                                                                                                                           |  | BCVA (letters) | p | <i>IVP</i>    | +5.2 | <0.05 vs C | <i>C</i>    | +1.2 |           |             |      |         |          |      |  |               |     |            |             |     |  |             |     |  |          |     |  |  |                  |   |               |                         |           |             |                        |         |             |                       |         |          |      |  |
|                                                                                                                            | BCVA (letters)                                                                                                                                                                                                                                                                                                                                                                                                                                                                                                                                                                                                                                                                                                                                                                                                                                                                                                                                                                                                                                                                                                                                                                                                                                                                                                                                                                                                                                                                                                                                                                                                      | p                                                                                                                                                                                                                                                                                                                                                                                                                                                                                                                                                                                                                                                                                                                                                                                                                 |                                                                                                                                                                                                                                                                                                                                                                                                                                                                                                                                                                                                                                                                                                                                                                                                                                                                                                                                                                                                                                                                                                                                                                                                                                                                                                                                     |  |                |   |               |      |            |             |      |           |             |      |         |          |      |  |               |     |            |             |     |  |             |     |  |          |     |  |  |                  |   |               |                         |           |             |                        |         |             |                       |         |          |      |  |
| <i>IVP</i>                                                                                                                 | +5.2                                                                                                                                                                                                                                                                                                                                                                                                                                                                                                                                                                                                                                                                                                                                                                                                                                                                                                                                                                                                                                                                                                                                                                                                                                                                                                                                                                                                                                                                                                                                                                                                                | <0.05 vs C                                                                                                                                                                                                                                                                                                                                                                                                                                                                                                                                                                                                                                                                                                                                                                                                        |                                                                                                                                                                                                                                                                                                                                                                                                                                                                                                                                                                                                                                                                                                                                                                                                                                                                                                                                                                                                                                                                                                                                                                                                                                                                                                                                     |  |                |   |               |      |            |             |      |           |             |      |         |          |      |  |               |     |            |             |     |  |             |     |  |          |     |  |  |                  |   |               |                         |           |             |                        |         |             |                       |         |          |      |  |
| <i>C</i>                                                                                                                   | +1.2                                                                                                                                                                                                                                                                                                                                                                                                                                                                                                                                                                                                                                                                                                                                                                                                                                                                                                                                                                                                                                                                                                                                                                                                                                                                                                                                                                                                                                                                                                                                                                                                                |                                                                                                                                                                                                                                                                                                                                                                                                                                                                                                                                                                                                                                                                                                                                                                                                                   |                                                                                                                                                                                                                                                                                                                                                                                                                                                                                                                                                                                                                                                                                                                                                                                                                                                                                                                                                                                                                                                                                                                                                                                                                                                                                                                                     |  |                |   |               |      |            |             |      |           |             |      |         |          |      |  |               |     |            |             |     |  |             |     |  |          |     |  |  |                  |   |               |                         |           |             |                        |         |             |                       |         |          |      |  |

| Study                                                                  | Participants and baseline values                                                                                                                                                                                                                                                                                                                                                                                                                                                                                                                                                                                                                                                                                                                                                                                                                                                                                                                                                                                                          | Intervention                                                                                                                                                                                                                                                                                                                                                                                            | Outcome (change from baseline at study end)                                                                                                                                                                                                                                                                                                                                                                                                                                                                                                                                                                                                                                                                                                                                                                                                                                                                                                                                                                                                                                                                                                                                                                                                                                                                                                                                                                                                                                                                                                                                                                                                                                                                                                                                                                                                                                                                                                                                                                                                                                                                                                                                                                                                                                                                                                                                                                                                                                           |         |  |  |            |       |             |          |       |  |                                |  |  |            |      |            |          |       |  |                                |  |  |            |       |         |          |      |  |                 |  |  |            |             |         |  |             |  |          |             |  |  |             |  |  |                |   |            |      |            |          |      |  |                  |  |  |            |       |         |          |       |  |                                |  |  |            |      |         |          |       |  |                                |  |  |            |       |           |          |      |  |                 |  |  |            |             |         |  |             |  |
|------------------------------------------------------------------------|-------------------------------------------------------------------------------------------------------------------------------------------------------------------------------------------------------------------------------------------------------------------------------------------------------------------------------------------------------------------------------------------------------------------------------------------------------------------------------------------------------------------------------------------------------------------------------------------------------------------------------------------------------------------------------------------------------------------------------------------------------------------------------------------------------------------------------------------------------------------------------------------------------------------------------------------------------------------------------------------------------------------------------------------|---------------------------------------------------------------------------------------------------------------------------------------------------------------------------------------------------------------------------------------------------------------------------------------------------------------------------------------------------------------------------------------------------------|---------------------------------------------------------------------------------------------------------------------------------------------------------------------------------------------------------------------------------------------------------------------------------------------------------------------------------------------------------------------------------------------------------------------------------------------------------------------------------------------------------------------------------------------------------------------------------------------------------------------------------------------------------------------------------------------------------------------------------------------------------------------------------------------------------------------------------------------------------------------------------------------------------------------------------------------------------------------------------------------------------------------------------------------------------------------------------------------------------------------------------------------------------------------------------------------------------------------------------------------------------------------------------------------------------------------------------------------------------------------------------------------------------------------------------------------------------------------------------------------------------------------------------------------------------------------------------------------------------------------------------------------------------------------------------------------------------------------------------------------------------------------------------------------------------------------------------------------------------------------------------------------------------------------------------------------------------------------------------------------------------------------------------------------------------------------------------------------------------------------------------------------------------------------------------------------------------------------------------------------------------------------------------------------------------------------------------------------------------------------------------------------------------------------------------------------------------------------------------------|---------|--|--|------------|-------|-------------|----------|-------|--|--------------------------------|--|--|------------|------|------------|----------|-------|--|--------------------------------|--|--|------------|-------|---------|----------|------|--|-----------------|--|--|------------|-------------|---------|--|-------------|--|----------|-------------|--|--|-------------|--|--|----------------|---|------------|------|------------|----------|------|--|------------------|--|--|------------|-------|---------|----------|-------|--|--------------------------------|--|--|------------|------|---------|----------|-------|--|--------------------------------|--|--|------------|-------|-----------|----------|------|--|-----------------|--|--|------------|-------------|---------|--|-------------|--|
| <p><b>Follow-up:</b> 2 years (primary efficacy endpoint at 1 year)</p> | <p>grid photocoagulation within prior 16 weeks; panretinal photocoagulation &lt;6 months before baseline or likely to be needed within 9 months; significant media opacities; intraocular surgery in prior 6 months; pathologic high myopia; prior radiation in region of study eye; history of severe cardiac or peripheral vascular disease, stroke in prior 12 months, major surgery in prior 1 month, treatment in prior 90 days with any investigational agent or with bevacizumab for any nonocular condition, HbA1c ≥10% or signs of uncontrolled diabetes, hypertension, known relevant allergies; pregnant or lactating<br/> <b>Age:</b> 62.3 to 62.5 SD9.3 to 10.2 years<br/> <b>Sex:</b> 39 to 46% female<br/> <b>Diabetes type:</b> 6.3 to 7.5% type 1 DM, 92.5 to 93.7% type 2 DM<br/> <b>HbA1c:</b> 42.5 to 45.9% &lt;7.6%, 54.1 to 57.5% &gt;7.6%<br/> <b>Baseline VA:</b> letter score 57.0 to 57.5 SD8.1 to 8.9<br/> <b>Baseline CMT:</b> 441.6 to 464.6 SD135.5 to 148.5 μm<br/> <b>Comorbidities:</b> not reported</p> | <p><b>Regimen for all groups:</b> injections every 6 weeks up to week 48 (9 injections); at investigator determination (ETDRS criteria), laser photocoagulation could be performed at week 18, with possible repeat treatment at a minimum of 17 weeks later (maximum 3 treatments per year) (laser treatments in 25.2% of IVP group and 45% of C group); in year 2, injections as judged necessary</p> | <table border="1"> <thead> <tr> <th colspan="3">letters</th> </tr> </thead> <tbody> <tr> <td><i>IVP</i></td> <td>36.8%</td> <td>0.0047 vs C</td> </tr> <tr> <td><i>C</i></td> <td>19.7%</td> <td></td> </tr> </tbody> </table> <p><b>Retinopathy:</b></p> <table border="1"> <thead> <tr> <th colspan="3">increase in degree by ≥2 steps</th> </tr> </thead> <tbody> <tr> <td><i>IVP</i></td> <td>4.1%</td> <td>0.047 vs C</td> </tr> <tr> <td><i>C</i></td> <td>12.4%</td> <td></td> </tr> </tbody> </table> <table border="1"> <thead> <tr> <th colspan="3">decrease in degree by ≥2 steps</th> </tr> </thead> <tbody> <tr> <td><i>IVP</i></td> <td>10.2%</td> <td>NS vs C</td> </tr> <tr> <td><i>C</i></td> <td>3.1%</td> <td></td> </tr> </tbody> </table> <p><b>CMT (OCT):</b></p> <table border="1"> <thead> <tr> <th colspan="3">decrease in CMT</th> </tr> </thead> <tbody> <tr> <td><i>IVP</i></td> <td>≥25%: 31.7%</td> <td>NS vs C</td> </tr> <tr> <td></td> <td>≥50%: 14.6%</td> <td></td> </tr> <tr> <td><i>C</i></td> <td>≥25%: 23.7%</td> <td></td> </tr> <tr> <td></td> <td>≥50%: 11.9%</td> <td></td> </tr> </tbody> </table> <p><b>At 2 years</b></p> <p><b>BCVA (ETDRS):</b></p> <table border="1"> <thead> <tr> <th></th> <th>BCVA (letters)</th> <th>p</th> </tr> </thead> <tbody> <tr> <td><i>IVP</i></td> <td>+6.1</td> <td>&lt;0.01 vs C</td> </tr> <tr> <td><i>C</i></td> <td>+1.3</td> <td></td> </tr> </tbody> </table> <table border="1"> <thead> <tr> <th colspan="3">plus ≥10 letters</th> </tr> </thead> <tbody> <tr> <td><i>IVP</i></td> <td>38.3%</td> <td>NS vs C</td> </tr> <tr> <td><i>C</i></td> <td>30.0%</td> <td></td> </tr> </tbody> </table> <p><b>Retinopathy:</b></p> <table border="1"> <thead> <tr> <th colspan="3">increase in degree by ≥2 steps</th> </tr> </thead> <tbody> <tr> <td><i>IVP</i></td> <td>6.3%</td> <td>NS vs C</td> </tr> <tr> <td><i>C</i></td> <td>13.8%</td> <td></td> </tr> </tbody> </table> <table border="1"> <thead> <tr> <th colspan="3">decrease in degree by ≥2 steps</th> </tr> </thead> <tbody> <tr> <td><i>IVP</i></td> <td>16.3%</td> <td>0.03 vs C</td> </tr> <tr> <td><i>C</i></td> <td>3.8%</td> <td></td> </tr> </tbody> </table> <p><b>CMT (OCT):</b></p> <table border="1"> <thead> <tr> <th colspan="3">decrease in CMT</th> </tr> </thead> <tbody> <tr> <td><i>IVP</i></td> <td>≥25%: 40.4%</td> <td>NS vs C</td> </tr> <tr> <td></td> <td>≥50%: 19.2%</td> <td></td> </tr> </tbody> </table> | letters |  |  | <i>IVP</i> | 36.8% | 0.0047 vs C | <i>C</i> | 19.7% |  | increase in degree by ≥2 steps |  |  | <i>IVP</i> | 4.1% | 0.047 vs C | <i>C</i> | 12.4% |  | decrease in degree by ≥2 steps |  |  | <i>IVP</i> | 10.2% | NS vs C | <i>C</i> | 3.1% |  | decrease in CMT |  |  | <i>IVP</i> | ≥25%: 31.7% | NS vs C |  | ≥50%: 14.6% |  | <i>C</i> | ≥25%: 23.7% |  |  | ≥50%: 11.9% |  |  | BCVA (letters) | p | <i>IVP</i> | +6.1 | <0.01 vs C | <i>C</i> | +1.3 |  | plus ≥10 letters |  |  | <i>IVP</i> | 38.3% | NS vs C | <i>C</i> | 30.0% |  | increase in degree by ≥2 steps |  |  | <i>IVP</i> | 6.3% | NS vs C | <i>C</i> | 13.8% |  | decrease in degree by ≥2 steps |  |  | <i>IVP</i> | 16.3% | 0.03 vs C | <i>C</i> | 3.8% |  | decrease in CMT |  |  | <i>IVP</i> | ≥25%: 40.4% | NS vs C |  | ≥50%: 19.2% |  |
| letters                                                                |                                                                                                                                                                                                                                                                                                                                                                                                                                                                                                                                                                                                                                                                                                                                                                                                                                                                                                                                                                                                                                           |                                                                                                                                                                                                                                                                                                                                                                                                         |                                                                                                                                                                                                                                                                                                                                                                                                                                                                                                                                                                                                                                                                                                                                                                                                                                                                                                                                                                                                                                                                                                                                                                                                                                                                                                                                                                                                                                                                                                                                                                                                                                                                                                                                                                                                                                                                                                                                                                                                                                                                                                                                                                                                                                                                                                                                                                                                                                                                                       |         |  |  |            |       |             |          |       |  |                                |  |  |            |      |            |          |       |  |                                |  |  |            |       |         |          |      |  |                 |  |  |            |             |         |  |             |  |          |             |  |  |             |  |  |                |   |            |      |            |          |      |  |                  |  |  |            |       |         |          |       |  |                                |  |  |            |      |         |          |       |  |                                |  |  |            |       |           |          |      |  |                 |  |  |            |             |         |  |             |  |
| <i>IVP</i>                                                             | 36.8%                                                                                                                                                                                                                                                                                                                                                                                                                                                                                                                                                                                                                                                                                                                                                                                                                                                                                                                                                                                                                                     | 0.0047 vs C                                                                                                                                                                                                                                                                                                                                                                                             |                                                                                                                                                                                                                                                                                                                                                                                                                                                                                                                                                                                                                                                                                                                                                                                                                                                                                                                                                                                                                                                                                                                                                                                                                                                                                                                                                                                                                                                                                                                                                                                                                                                                                                                                                                                                                                                                                                                                                                                                                                                                                                                                                                                                                                                                                                                                                                                                                                                                                       |         |  |  |            |       |             |          |       |  |                                |  |  |            |      |            |          |       |  |                                |  |  |            |       |         |          |      |  |                 |  |  |            |             |         |  |             |  |          |             |  |  |             |  |  |                |   |            |      |            |          |      |  |                  |  |  |            |       |         |          |       |  |                                |  |  |            |      |         |          |       |  |                                |  |  |            |       |           |          |      |  |                 |  |  |            |             |         |  |             |  |
| <i>C</i>                                                               | 19.7%                                                                                                                                                                                                                                                                                                                                                                                                                                                                                                                                                                                                                                                                                                                                                                                                                                                                                                                                                                                                                                     |                                                                                                                                                                                                                                                                                                                                                                                                         |                                                                                                                                                                                                                                                                                                                                                                                                                                                                                                                                                                                                                                                                                                                                                                                                                                                                                                                                                                                                                                                                                                                                                                                                                                                                                                                                                                                                                                                                                                                                                                                                                                                                                                                                                                                                                                                                                                                                                                                                                                                                                                                                                                                                                                                                                                                                                                                                                                                                                       |         |  |  |            |       |             |          |       |  |                                |  |  |            |      |            |          |       |  |                                |  |  |            |       |         |          |      |  |                 |  |  |            |             |         |  |             |  |          |             |  |  |             |  |  |                |   |            |      |            |          |      |  |                  |  |  |            |       |         |          |       |  |                                |  |  |            |      |         |          |       |  |                                |  |  |            |       |           |          |      |  |                 |  |  |            |             |         |  |             |  |
| increase in degree by ≥2 steps                                         |                                                                                                                                                                                                                                                                                                                                                                                                                                                                                                                                                                                                                                                                                                                                                                                                                                                                                                                                                                                                                                           |                                                                                                                                                                                                                                                                                                                                                                                                         |                                                                                                                                                                                                                                                                                                                                                                                                                                                                                                                                                                                                                                                                                                                                                                                                                                                                                                                                                                                                                                                                                                                                                                                                                                                                                                                                                                                                                                                                                                                                                                                                                                                                                                                                                                                                                                                                                                                                                                                                                                                                                                                                                                                                                                                                                                                                                                                                                                                                                       |         |  |  |            |       |             |          |       |  |                                |  |  |            |      |            |          |       |  |                                |  |  |            |       |         |          |      |  |                 |  |  |            |             |         |  |             |  |          |             |  |  |             |  |  |                |   |            |      |            |          |      |  |                  |  |  |            |       |         |          |       |  |                                |  |  |            |      |         |          |       |  |                                |  |  |            |       |           |          |      |  |                 |  |  |            |             |         |  |             |  |
| <i>IVP</i>                                                             | 4.1%                                                                                                                                                                                                                                                                                                                                                                                                                                                                                                                                                                                                                                                                                                                                                                                                                                                                                                                                                                                                                                      | 0.047 vs C                                                                                                                                                                                                                                                                                                                                                                                              |                                                                                                                                                                                                                                                                                                                                                                                                                                                                                                                                                                                                                                                                                                                                                                                                                                                                                                                                                                                                                                                                                                                                                                                                                                                                                                                                                                                                                                                                                                                                                                                                                                                                                                                                                                                                                                                                                                                                                                                                                                                                                                                                                                                                                                                                                                                                                                                                                                                                                       |         |  |  |            |       |             |          |       |  |                                |  |  |            |      |            |          |       |  |                                |  |  |            |       |         |          |      |  |                 |  |  |            |             |         |  |             |  |          |             |  |  |             |  |  |                |   |            |      |            |          |      |  |                  |  |  |            |       |         |          |       |  |                                |  |  |            |      |         |          |       |  |                                |  |  |            |       |           |          |      |  |                 |  |  |            |             |         |  |             |  |
| <i>C</i>                                                               | 12.4%                                                                                                                                                                                                                                                                                                                                                                                                                                                                                                                                                                                                                                                                                                                                                                                                                                                                                                                                                                                                                                     |                                                                                                                                                                                                                                                                                                                                                                                                         |                                                                                                                                                                                                                                                                                                                                                                                                                                                                                                                                                                                                                                                                                                                                                                                                                                                                                                                                                                                                                                                                                                                                                                                                                                                                                                                                                                                                                                                                                                                                                                                                                                                                                                                                                                                                                                                                                                                                                                                                                                                                                                                                                                                                                                                                                                                                                                                                                                                                                       |         |  |  |            |       |             |          |       |  |                                |  |  |            |      |            |          |       |  |                                |  |  |            |       |         |          |      |  |                 |  |  |            |             |         |  |             |  |          |             |  |  |             |  |  |                |   |            |      |            |          |      |  |                  |  |  |            |       |         |          |       |  |                                |  |  |            |      |         |          |       |  |                                |  |  |            |       |           |          |      |  |                 |  |  |            |             |         |  |             |  |
| decrease in degree by ≥2 steps                                         |                                                                                                                                                                                                                                                                                                                                                                                                                                                                                                                                                                                                                                                                                                                                                                                                                                                                                                                                                                                                                                           |                                                                                                                                                                                                                                                                                                                                                                                                         |                                                                                                                                                                                                                                                                                                                                                                                                                                                                                                                                                                                                                                                                                                                                                                                                                                                                                                                                                                                                                                                                                                                                                                                                                                                                                                                                                                                                                                                                                                                                                                                                                                                                                                                                                                                                                                                                                                                                                                                                                                                                                                                                                                                                                                                                                                                                                                                                                                                                                       |         |  |  |            |       |             |          |       |  |                                |  |  |            |      |            |          |       |  |                                |  |  |            |       |         |          |      |  |                 |  |  |            |             |         |  |             |  |          |             |  |  |             |  |  |                |   |            |      |            |          |      |  |                  |  |  |            |       |         |          |       |  |                                |  |  |            |      |         |          |       |  |                                |  |  |            |       |           |          |      |  |                 |  |  |            |             |         |  |             |  |
| <i>IVP</i>                                                             | 10.2%                                                                                                                                                                                                                                                                                                                                                                                                                                                                                                                                                                                                                                                                                                                                                                                                                                                                                                                                                                                                                                     | NS vs C                                                                                                                                                                                                                                                                                                                                                                                                 |                                                                                                                                                                                                                                                                                                                                                                                                                                                                                                                                                                                                                                                                                                                                                                                                                                                                                                                                                                                                                                                                                                                                                                                                                                                                                                                                                                                                                                                                                                                                                                                                                                                                                                                                                                                                                                                                                                                                                                                                                                                                                                                                                                                                                                                                                                                                                                                                                                                                                       |         |  |  |            |       |             |          |       |  |                                |  |  |            |      |            |          |       |  |                                |  |  |            |       |         |          |      |  |                 |  |  |            |             |         |  |             |  |          |             |  |  |             |  |  |                |   |            |      |            |          |      |  |                  |  |  |            |       |         |          |       |  |                                |  |  |            |      |         |          |       |  |                                |  |  |            |       |           |          |      |  |                 |  |  |            |             |         |  |             |  |
| <i>C</i>                                                               | 3.1%                                                                                                                                                                                                                                                                                                                                                                                                                                                                                                                                                                                                                                                                                                                                                                                                                                                                                                                                                                                                                                      |                                                                                                                                                                                                                                                                                                                                                                                                         |                                                                                                                                                                                                                                                                                                                                                                                                                                                                                                                                                                                                                                                                                                                                                                                                                                                                                                                                                                                                                                                                                                                                                                                                                                                                                                                                                                                                                                                                                                                                                                                                                                                                                                                                                                                                                                                                                                                                                                                                                                                                                                                                                                                                                                                                                                                                                                                                                                                                                       |         |  |  |            |       |             |          |       |  |                                |  |  |            |      |            |          |       |  |                                |  |  |            |       |         |          |      |  |                 |  |  |            |             |         |  |             |  |          |             |  |  |             |  |  |                |   |            |      |            |          |      |  |                  |  |  |            |       |         |          |       |  |                                |  |  |            |      |         |          |       |  |                                |  |  |            |       |           |          |      |  |                 |  |  |            |             |         |  |             |  |
| decrease in CMT                                                        |                                                                                                                                                                                                                                                                                                                                                                                                                                                                                                                                                                                                                                                                                                                                                                                                                                                                                                                                                                                                                                           |                                                                                                                                                                                                                                                                                                                                                                                                         |                                                                                                                                                                                                                                                                                                                                                                                                                                                                                                                                                                                                                                                                                                                                                                                                                                                                                                                                                                                                                                                                                                                                                                                                                                                                                                                                                                                                                                                                                                                                                                                                                                                                                                                                                                                                                                                                                                                                                                                                                                                                                                                                                                                                                                                                                                                                                                                                                                                                                       |         |  |  |            |       |             |          |       |  |                                |  |  |            |      |            |          |       |  |                                |  |  |            |       |         |          |      |  |                 |  |  |            |             |         |  |             |  |          |             |  |  |             |  |  |                |   |            |      |            |          |      |  |                  |  |  |            |       |         |          |       |  |                                |  |  |            |      |         |          |       |  |                                |  |  |            |       |           |          |      |  |                 |  |  |            |             |         |  |             |  |
| <i>IVP</i>                                                             | ≥25%: 31.7%                                                                                                                                                                                                                                                                                                                                                                                                                                                                                                                                                                                                                                                                                                                                                                                                                                                                                                                                                                                                                               | NS vs C                                                                                                                                                                                                                                                                                                                                                                                                 |                                                                                                                                                                                                                                                                                                                                                                                                                                                                                                                                                                                                                                                                                                                                                                                                                                                                                                                                                                                                                                                                                                                                                                                                                                                                                                                                                                                                                                                                                                                                                                                                                                                                                                                                                                                                                                                                                                                                                                                                                                                                                                                                                                                                                                                                                                                                                                                                                                                                                       |         |  |  |            |       |             |          |       |  |                                |  |  |            |      |            |          |       |  |                                |  |  |            |       |         |          |      |  |                 |  |  |            |             |         |  |             |  |          |             |  |  |             |  |  |                |   |            |      |            |          |      |  |                  |  |  |            |       |         |          |       |  |                                |  |  |            |      |         |          |       |  |                                |  |  |            |       |           |          |      |  |                 |  |  |            |             |         |  |             |  |
|                                                                        | ≥50%: 14.6%                                                                                                                                                                                                                                                                                                                                                                                                                                                                                                                                                                                                                                                                                                                                                                                                                                                                                                                                                                                                                               |                                                                                                                                                                                                                                                                                                                                                                                                         |                                                                                                                                                                                                                                                                                                                                                                                                                                                                                                                                                                                                                                                                                                                                                                                                                                                                                                                                                                                                                                                                                                                                                                                                                                                                                                                                                                                                                                                                                                                                                                                                                                                                                                                                                                                                                                                                                                                                                                                                                                                                                                                                                                                                                                                                                                                                                                                                                                                                                       |         |  |  |            |       |             |          |       |  |                                |  |  |            |      |            |          |       |  |                                |  |  |            |       |         |          |      |  |                 |  |  |            |             |         |  |             |  |          |             |  |  |             |  |  |                |   |            |      |            |          |      |  |                  |  |  |            |       |         |          |       |  |                                |  |  |            |      |         |          |       |  |                                |  |  |            |       |           |          |      |  |                 |  |  |            |             |         |  |             |  |
| <i>C</i>                                                               | ≥25%: 23.7%                                                                                                                                                                                                                                                                                                                                                                                                                                                                                                                                                                                                                                                                                                                                                                                                                                                                                                                                                                                                                               |                                                                                                                                                                                                                                                                                                                                                                                                         |                                                                                                                                                                                                                                                                                                                                                                                                                                                                                                                                                                                                                                                                                                                                                                                                                                                                                                                                                                                                                                                                                                                                                                                                                                                                                                                                                                                                                                                                                                                                                                                                                                                                                                                                                                                                                                                                                                                                                                                                                                                                                                                                                                                                                                                                                                                                                                                                                                                                                       |         |  |  |            |       |             |          |       |  |                                |  |  |            |      |            |          |       |  |                                |  |  |            |       |         |          |      |  |                 |  |  |            |             |         |  |             |  |          |             |  |  |             |  |  |                |   |            |      |            |          |      |  |                  |  |  |            |       |         |          |       |  |                                |  |  |            |      |         |          |       |  |                                |  |  |            |       |           |          |      |  |                 |  |  |            |             |         |  |             |  |
|                                                                        | ≥50%: 11.9%                                                                                                                                                                                                                                                                                                                                                                                                                                                                                                                                                                                                                                                                                                                                                                                                                                                                                                                                                                                                                               |                                                                                                                                                                                                                                                                                                                                                                                                         |                                                                                                                                                                                                                                                                                                                                                                                                                                                                                                                                                                                                                                                                                                                                                                                                                                                                                                                                                                                                                                                                                                                                                                                                                                                                                                                                                                                                                                                                                                                                                                                                                                                                                                                                                                                                                                                                                                                                                                                                                                                                                                                                                                                                                                                                                                                                                                                                                                                                                       |         |  |  |            |       |             |          |       |  |                                |  |  |            |      |            |          |       |  |                                |  |  |            |       |         |          |      |  |                 |  |  |            |             |         |  |             |  |          |             |  |  |             |  |  |                |   |            |      |            |          |      |  |                  |  |  |            |       |         |          |       |  |                                |  |  |            |      |         |          |       |  |                                |  |  |            |       |           |          |      |  |                 |  |  |            |             |         |  |             |  |
|                                                                        | BCVA (letters)                                                                                                                                                                                                                                                                                                                                                                                                                                                                                                                                                                                                                                                                                                                                                                                                                                                                                                                                                                                                                            | p                                                                                                                                                                                                                                                                                                                                                                                                       |                                                                                                                                                                                                                                                                                                                                                                                                                                                                                                                                                                                                                                                                                                                                                                                                                                                                                                                                                                                                                                                                                                                                                                                                                                                                                                                                                                                                                                                                                                                                                                                                                                                                                                                                                                                                                                                                                                                                                                                                                                                                                                                                                                                                                                                                                                                                                                                                                                                                                       |         |  |  |            |       |             |          |       |  |                                |  |  |            |      |            |          |       |  |                                |  |  |            |       |         |          |      |  |                 |  |  |            |             |         |  |             |  |          |             |  |  |             |  |  |                |   |            |      |            |          |      |  |                  |  |  |            |       |         |          |       |  |                                |  |  |            |      |         |          |       |  |                                |  |  |            |       |           |          |      |  |                 |  |  |            |             |         |  |             |  |
| <i>IVP</i>                                                             | +6.1                                                                                                                                                                                                                                                                                                                                                                                                                                                                                                                                                                                                                                                                                                                                                                                                                                                                                                                                                                                                                                      | <0.01 vs C                                                                                                                                                                                                                                                                                                                                                                                              |                                                                                                                                                                                                                                                                                                                                                                                                                                                                                                                                                                                                                                                                                                                                                                                                                                                                                                                                                                                                                                                                                                                                                                                                                                                                                                                                                                                                                                                                                                                                                                                                                                                                                                                                                                                                                                                                                                                                                                                                                                                                                                                                                                                                                                                                                                                                                                                                                                                                                       |         |  |  |            |       |             |          |       |  |                                |  |  |            |      |            |          |       |  |                                |  |  |            |       |         |          |      |  |                 |  |  |            |             |         |  |             |  |          |             |  |  |             |  |  |                |   |            |      |            |          |      |  |                  |  |  |            |       |         |          |       |  |                                |  |  |            |      |         |          |       |  |                                |  |  |            |       |           |          |      |  |                 |  |  |            |             |         |  |             |  |
| <i>C</i>                                                               | +1.3                                                                                                                                                                                                                                                                                                                                                                                                                                                                                                                                                                                                                                                                                                                                                                                                                                                                                                                                                                                                                                      |                                                                                                                                                                                                                                                                                                                                                                                                         |                                                                                                                                                                                                                                                                                                                                                                                                                                                                                                                                                                                                                                                                                                                                                                                                                                                                                                                                                                                                                                                                                                                                                                                                                                                                                                                                                                                                                                                                                                                                                                                                                                                                                                                                                                                                                                                                                                                                                                                                                                                                                                                                                                                                                                                                                                                                                                                                                                                                                       |         |  |  |            |       |             |          |       |  |                                |  |  |            |      |            |          |       |  |                                |  |  |            |       |         |          |      |  |                 |  |  |            |             |         |  |             |  |          |             |  |  |             |  |  |                |   |            |      |            |          |      |  |                  |  |  |            |       |         |          |       |  |                                |  |  |            |      |         |          |       |  |                                |  |  |            |       |           |          |      |  |                 |  |  |            |             |         |  |             |  |
| plus ≥10 letters                                                       |                                                                                                                                                                                                                                                                                                                                                                                                                                                                                                                                                                                                                                                                                                                                                                                                                                                                                                                                                                                                                                           |                                                                                                                                                                                                                                                                                                                                                                                                         |                                                                                                                                                                                                                                                                                                                                                                                                                                                                                                                                                                                                                                                                                                                                                                                                                                                                                                                                                                                                                                                                                                                                                                                                                                                                                                                                                                                                                                                                                                                                                                                                                                                                                                                                                                                                                                                                                                                                                                                                                                                                                                                                                                                                                                                                                                                                                                                                                                                                                       |         |  |  |            |       |             |          |       |  |                                |  |  |            |      |            |          |       |  |                                |  |  |            |       |         |          |      |  |                 |  |  |            |             |         |  |             |  |          |             |  |  |             |  |  |                |   |            |      |            |          |      |  |                  |  |  |            |       |         |          |       |  |                                |  |  |            |      |         |          |       |  |                                |  |  |            |       |           |          |      |  |                 |  |  |            |             |         |  |             |  |
| <i>IVP</i>                                                             | 38.3%                                                                                                                                                                                                                                                                                                                                                                                                                                                                                                                                                                                                                                                                                                                                                                                                                                                                                                                                                                                                                                     | NS vs C                                                                                                                                                                                                                                                                                                                                                                                                 |                                                                                                                                                                                                                                                                                                                                                                                                                                                                                                                                                                                                                                                                                                                                                                                                                                                                                                                                                                                                                                                                                                                                                                                                                                                                                                                                                                                                                                                                                                                                                                                                                                                                                                                                                                                                                                                                                                                                                                                                                                                                                                                                                                                                                                                                                                                                                                                                                                                                                       |         |  |  |            |       |             |          |       |  |                                |  |  |            |      |            |          |       |  |                                |  |  |            |       |         |          |      |  |                 |  |  |            |             |         |  |             |  |          |             |  |  |             |  |  |                |   |            |      |            |          |      |  |                  |  |  |            |       |         |          |       |  |                                |  |  |            |      |         |          |       |  |                                |  |  |            |       |           |          |      |  |                 |  |  |            |             |         |  |             |  |
| <i>C</i>                                                               | 30.0%                                                                                                                                                                                                                                                                                                                                                                                                                                                                                                                                                                                                                                                                                                                                                                                                                                                                                                                                                                                                                                     |                                                                                                                                                                                                                                                                                                                                                                                                         |                                                                                                                                                                                                                                                                                                                                                                                                                                                                                                                                                                                                                                                                                                                                                                                                                                                                                                                                                                                                                                                                                                                                                                                                                                                                                                                                                                                                                                                                                                                                                                                                                                                                                                                                                                                                                                                                                                                                                                                                                                                                                                                                                                                                                                                                                                                                                                                                                                                                                       |         |  |  |            |       |             |          |       |  |                                |  |  |            |      |            |          |       |  |                                |  |  |            |       |         |          |      |  |                 |  |  |            |             |         |  |             |  |          |             |  |  |             |  |  |                |   |            |      |            |          |      |  |                  |  |  |            |       |         |          |       |  |                                |  |  |            |      |         |          |       |  |                                |  |  |            |       |           |          |      |  |                 |  |  |            |             |         |  |             |  |
| increase in degree by ≥2 steps                                         |                                                                                                                                                                                                                                                                                                                                                                                                                                                                                                                                                                                                                                                                                                                                                                                                                                                                                                                                                                                                                                           |                                                                                                                                                                                                                                                                                                                                                                                                         |                                                                                                                                                                                                                                                                                                                                                                                                                                                                                                                                                                                                                                                                                                                                                                                                                                                                                                                                                                                                                                                                                                                                                                                                                                                                                                                                                                                                                                                                                                                                                                                                                                                                                                                                                                                                                                                                                                                                                                                                                                                                                                                                                                                                                                                                                                                                                                                                                                                                                       |         |  |  |            |       |             |          |       |  |                                |  |  |            |      |            |          |       |  |                                |  |  |            |       |         |          |      |  |                 |  |  |            |             |         |  |             |  |          |             |  |  |             |  |  |                |   |            |      |            |          |      |  |                  |  |  |            |       |         |          |       |  |                                |  |  |            |      |         |          |       |  |                                |  |  |            |       |           |          |      |  |                 |  |  |            |             |         |  |             |  |
| <i>IVP</i>                                                             | 6.3%                                                                                                                                                                                                                                                                                                                                                                                                                                                                                                                                                                                                                                                                                                                                                                                                                                                                                                                                                                                                                                      | NS vs C                                                                                                                                                                                                                                                                                                                                                                                                 |                                                                                                                                                                                                                                                                                                                                                                                                                                                                                                                                                                                                                                                                                                                                                                                                                                                                                                                                                                                                                                                                                                                                                                                                                                                                                                                                                                                                                                                                                                                                                                                                                                                                                                                                                                                                                                                                                                                                                                                                                                                                                                                                                                                                                                                                                                                                                                                                                                                                                       |         |  |  |            |       |             |          |       |  |                                |  |  |            |      |            |          |       |  |                                |  |  |            |       |         |          |      |  |                 |  |  |            |             |         |  |             |  |          |             |  |  |             |  |  |                |   |            |      |            |          |      |  |                  |  |  |            |       |         |          |       |  |                                |  |  |            |      |         |          |       |  |                                |  |  |            |       |           |          |      |  |                 |  |  |            |             |         |  |             |  |
| <i>C</i>                                                               | 13.8%                                                                                                                                                                                                                                                                                                                                                                                                                                                                                                                                                                                                                                                                                                                                                                                                                                                                                                                                                                                                                                     |                                                                                                                                                                                                                                                                                                                                                                                                         |                                                                                                                                                                                                                                                                                                                                                                                                                                                                                                                                                                                                                                                                                                                                                                                                                                                                                                                                                                                                                                                                                                                                                                                                                                                                                                                                                                                                                                                                                                                                                                                                                                                                                                                                                                                                                                                                                                                                                                                                                                                                                                                                                                                                                                                                                                                                                                                                                                                                                       |         |  |  |            |       |             |          |       |  |                                |  |  |            |      |            |          |       |  |                                |  |  |            |       |         |          |      |  |                 |  |  |            |             |         |  |             |  |          |             |  |  |             |  |  |                |   |            |      |            |          |      |  |                  |  |  |            |       |         |          |       |  |                                |  |  |            |      |         |          |       |  |                                |  |  |            |       |           |          |      |  |                 |  |  |            |             |         |  |             |  |
| decrease in degree by ≥2 steps                                         |                                                                                                                                                                                                                                                                                                                                                                                                                                                                                                                                                                                                                                                                                                                                                                                                                                                                                                                                                                                                                                           |                                                                                                                                                                                                                                                                                                                                                                                                         |                                                                                                                                                                                                                                                                                                                                                                                                                                                                                                                                                                                                                                                                                                                                                                                                                                                                                                                                                                                                                                                                                                                                                                                                                                                                                                                                                                                                                                                                                                                                                                                                                                                                                                                                                                                                                                                                                                                                                                                                                                                                                                                                                                                                                                                                                                                                                                                                                                                                                       |         |  |  |            |       |             |          |       |  |                                |  |  |            |      |            |          |       |  |                                |  |  |            |       |         |          |      |  |                 |  |  |            |             |         |  |             |  |          |             |  |  |             |  |  |                |   |            |      |            |          |      |  |                  |  |  |            |       |         |          |       |  |                                |  |  |            |      |         |          |       |  |                                |  |  |            |       |           |          |      |  |                 |  |  |            |             |         |  |             |  |
| <i>IVP</i>                                                             | 16.3%                                                                                                                                                                                                                                                                                                                                                                                                                                                                                                                                                                                                                                                                                                                                                                                                                                                                                                                                                                                                                                     | 0.03 vs C                                                                                                                                                                                                                                                                                                                                                                                               |                                                                                                                                                                                                                                                                                                                                                                                                                                                                                                                                                                                                                                                                                                                                                                                                                                                                                                                                                                                                                                                                                                                                                                                                                                                                                                                                                                                                                                                                                                                                                                                                                                                                                                                                                                                                                                                                                                                                                                                                                                                                                                                                                                                                                                                                                                                                                                                                                                                                                       |         |  |  |            |       |             |          |       |  |                                |  |  |            |      |            |          |       |  |                                |  |  |            |       |         |          |      |  |                 |  |  |            |             |         |  |             |  |          |             |  |  |             |  |  |                |   |            |      |            |          |      |  |                  |  |  |            |       |         |          |       |  |                                |  |  |            |      |         |          |       |  |                                |  |  |            |       |           |          |      |  |                 |  |  |            |             |         |  |             |  |
| <i>C</i>                                                               | 3.8%                                                                                                                                                                                                                                                                                                                                                                                                                                                                                                                                                                                                                                                                                                                                                                                                                                                                                                                                                                                                                                      |                                                                                                                                                                                                                                                                                                                                                                                                         |                                                                                                                                                                                                                                                                                                                                                                                                                                                                                                                                                                                                                                                                                                                                                                                                                                                                                                                                                                                                                                                                                                                                                                                                                                                                                                                                                                                                                                                                                                                                                                                                                                                                                                                                                                                                                                                                                                                                                                                                                                                                                                                                                                                                                                                                                                                                                                                                                                                                                       |         |  |  |            |       |             |          |       |  |                                |  |  |            |      |            |          |       |  |                                |  |  |            |       |         |          |      |  |                 |  |  |            |             |         |  |             |  |          |             |  |  |             |  |  |                |   |            |      |            |          |      |  |                  |  |  |            |       |         |          |       |  |                                |  |  |            |      |         |          |       |  |                                |  |  |            |       |           |          |      |  |                 |  |  |            |             |         |  |             |  |
| decrease in CMT                                                        |                                                                                                                                                                                                                                                                                                                                                                                                                                                                                                                                                                                                                                                                                                                                                                                                                                                                                                                                                                                                                                           |                                                                                                                                                                                                                                                                                                                                                                                                         |                                                                                                                                                                                                                                                                                                                                                                                                                                                                                                                                                                                                                                                                                                                                                                                                                                                                                                                                                                                                                                                                                                                                                                                                                                                                                                                                                                                                                                                                                                                                                                                                                                                                                                                                                                                                                                                                                                                                                                                                                                                                                                                                                                                                                                                                                                                                                                                                                                                                                       |         |  |  |            |       |             |          |       |  |                                |  |  |            |      |            |          |       |  |                                |  |  |            |       |         |          |      |  |                 |  |  |            |             |         |  |             |  |          |             |  |  |             |  |  |                |   |            |      |            |          |      |  |                  |  |  |            |       |         |          |       |  |                                |  |  |            |      |         |          |       |  |                                |  |  |            |       |           |          |      |  |                 |  |  |            |             |         |  |             |  |
| <i>IVP</i>                                                             | ≥25%: 40.4%                                                                                                                                                                                                                                                                                                                                                                                                                                                                                                                                                                                                                                                                                                                                                                                                                                                                                                                                                                                                                               | NS vs C                                                                                                                                                                                                                                                                                                                                                                                                 |                                                                                                                                                                                                                                                                                                                                                                                                                                                                                                                                                                                                                                                                                                                                                                                                                                                                                                                                                                                                                                                                                                                                                                                                                                                                                                                                                                                                                                                                                                                                                                                                                                                                                                                                                                                                                                                                                                                                                                                                                                                                                                                                                                                                                                                                                                                                                                                                                                                                                       |         |  |  |            |       |             |          |       |  |                                |  |  |            |      |            |          |       |  |                                |  |  |            |       |         |          |      |  |                 |  |  |            |             |         |  |             |  |          |             |  |  |             |  |  |                |   |            |      |            |          |      |  |                  |  |  |            |       |         |          |       |  |                                |  |  |            |      |         |          |       |  |                                |  |  |            |       |           |          |      |  |                 |  |  |            |             |         |  |             |  |
|                                                                        | ≥50%: 19.2%                                                                                                                                                                                                                                                                                                                                                                                                                                                                                                                                                                                                                                                                                                                                                                                                                                                                                                                                                                                                                               |                                                                                                                                                                                                                                                                                                                                                                                                         |                                                                                                                                                                                                                                                                                                                                                                                                                                                                                                                                                                                                                                                                                                                                                                                                                                                                                                                                                                                                                                                                                                                                                                                                                                                                                                                                                                                                                                                                                                                                                                                                                                                                                                                                                                                                                                                                                                                                                                                                                                                                                                                                                                                                                                                                                                                                                                                                                                                                                       |         |  |  |            |       |             |          |       |  |                                |  |  |            |      |            |          |       |  |                                |  |  |            |       |         |          |      |  |                 |  |  |            |             |         |  |             |  |          |             |  |  |             |  |  |                |   |            |      |            |          |      |  |                  |  |  |            |       |         |          |       |  |                                |  |  |            |      |         |          |       |  |                                |  |  |            |       |           |          |      |  |                 |  |  |            |             |         |  |             |  |

1  
2  
3  
4  
5  
6  
7  
8  
9  
10  
11  
12  
13  
14  
15  
16  
17  
18  
19  
20  
21  
22  
23  
24  
25  
26  
27  
28  
29  
30  
31  
32  
33  
34  
35  
36  
37  
38  
39  
40  
41  
42  
43  
44  
45  
46  
47  
48  
49

| Study | Participants and baseline values | Intervention | Outcome (change from baseline at study end)                                                                                                                                                                                                                                                                                                                                                                                                                            |
|-------|----------------------------------|--------------|------------------------------------------------------------------------------------------------------------------------------------------------------------------------------------------------------------------------------------------------------------------------------------------------------------------------------------------------------------------------------------------------------------------------------------------------------------------------|
|       |                                  |              | <p><b>C</b></p> <p>≥25%: 44.6%</p> <p>≥50%: 26.1%</p> <hr/> <p><b>QoL:</b></p> <ul style="list-style-type: none"> <li>• NEI VFQ-25: between group differences not significant at 54 weeks; at 102 weeks, significantly greater improvement in composite score and subscales distance vision activities, social functioning and mental health with pegaptanib</li> <li>• EQ-5D: no significant differences between groups in EQ-5D scores at weeks 54 or 102</li> </ul> |

For peer review only

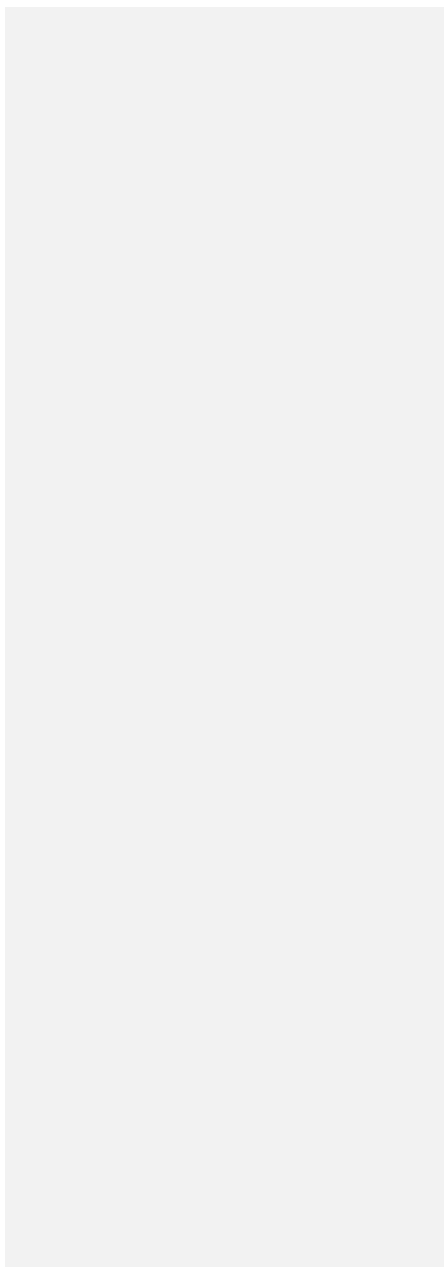

| Study                                                                                                                                                          | Participants and baseline values                                                                                                                                                                                                                                                                                                                                                                                                                                                                                                                                                                                                                                                                                                                                                                                                                                                                                                                                                                                                                                                                                                                                                                                                                                                                                                                                                                                                                                                                                                                                                                                                                                                                                                                                                                                                                                                                                                                                                                                                                                                                                                                                                                                                                                                                                                                                                                                                                                                                                                                                                                                                                                                                                        | Intervention                                                                                                                                                                                                                                                                                                                                                                                                                                                                                                         | Outcome (change from baseline at study end)                                                                                                                                                                                                                                                                                                                                                                                                                                                                                                                                                                                                                                                                                                                                                                                                                                                                                                                                                                                                                                                                                                                                                                                                                                                                                                                                                                                                                                                                                                                                                                                                                                                                                                                                                                                                                                                                                                                                                                                                                                                                                                                                                                                                                                                                                                                                    |  |                |   |               |      |            |               |       |              |               |      |            |               |       |             |          |      |  |  |                  |  |               |     |    |               |     |    |               |     |    |               |     |    |          |     |    |  |         |  |               |        |             |               |        |              |               |        |            |               |        |              |          |       |  |  |                |   |               |       |              |               |       |              |               |      |              |               |       |              |          |      |  |  |                  |  |               |       |             |               |       |             |               |       |             |               |       |             |          |       |  |
|----------------------------------------------------------------------------------------------------------------------------------------------------------------|-------------------------------------------------------------------------------------------------------------------------------------------------------------------------------------------------------------------------------------------------------------------------------------------------------------------------------------------------------------------------------------------------------------------------------------------------------------------------------------------------------------------------------------------------------------------------------------------------------------------------------------------------------------------------------------------------------------------------------------------------------------------------------------------------------------------------------------------------------------------------------------------------------------------------------------------------------------------------------------------------------------------------------------------------------------------------------------------------------------------------------------------------------------------------------------------------------------------------------------------------------------------------------------------------------------------------------------------------------------------------------------------------------------------------------------------------------------------------------------------------------------------------------------------------------------------------------------------------------------------------------------------------------------------------------------------------------------------------------------------------------------------------------------------------------------------------------------------------------------------------------------------------------------------------------------------------------------------------------------------------------------------------------------------------------------------------------------------------------------------------------------------------------------------------------------------------------------------------------------------------------------------------------------------------------------------------------------------------------------------------------------------------------------------------------------------------------------------------------------------------------------------------------------------------------------------------------------------------------------------------------------------------------------------------------------------------------------------------|----------------------------------------------------------------------------------------------------------------------------------------------------------------------------------------------------------------------------------------------------------------------------------------------------------------------------------------------------------------------------------------------------------------------------------------------------------------------------------------------------------------------|--------------------------------------------------------------------------------------------------------------------------------------------------------------------------------------------------------------------------------------------------------------------------------------------------------------------------------------------------------------------------------------------------------------------------------------------------------------------------------------------------------------------------------------------------------------------------------------------------------------------------------------------------------------------------------------------------------------------------------------------------------------------------------------------------------------------------------------------------------------------------------------------------------------------------------------------------------------------------------------------------------------------------------------------------------------------------------------------------------------------------------------------------------------------------------------------------------------------------------------------------------------------------------------------------------------------------------------------------------------------------------------------------------------------------------------------------------------------------------------------------------------------------------------------------------------------------------------------------------------------------------------------------------------------------------------------------------------------------------------------------------------------------------------------------------------------------------------------------------------------------------------------------------------------------------------------------------------------------------------------------------------------------------------------------------------------------------------------------------------------------------------------------------------------------------------------------------------------------------------------------------------------------------------------------------------------------------------------------------------------------------|--|----------------|---|---------------|------|------------|---------------|-------|--------------|---------------|------|------------|---------------|-------|-------------|----------|------|--|--|------------------|--|---------------|-----|----|---------------|-----|----|---------------|-----|----|---------------|-----|----|----------|-----|----|--|---------|--|---------------|--------|-------------|---------------|--------|--------------|---------------|--------|------------|---------------|--------|--------------|----------|-------|--|--|----------------|---|---------------|-------|--------------|---------------|-------|--------------|---------------|------|--------------|---------------|-------|--------------|----------|------|--|--|------------------|--|---------------|-------|-------------|---------------|-------|-------------|---------------|-------|-------------|---------------|-------|-------------|----------|-------|--|
| <p><i>Aflibercept</i></p> <p><b>DA VINCI 2010 (Do 2011)</b><br/>Multicenter[30,58]</p> <p><b>Design:</b> 5-arm phase II RCT<br/><b>Follow-up:</b> 24 weeks</p> | <p><b>N:</b> 221 eyes of 221 patients</p> <p><b>Inclusion criteria:</b> aged &gt;18 years and diagnosed with type 1 or 2 diabetes mellitus, with DMO involving the central macula defined as CRT (&gt;250 µm in the central subfield. Participants were required to have BCVA letter score at 4 m of 73 to 24. Women of childbearing potential were included only if they were willing to not become pregnant and to use a reliable form of birth control during the study period.</p> <p><b>Exclusion criteria:</b> history of vitreoretinal surgery; panretinal or macular laser photocoagulation or use of intraocular or periocular corticosteroids or anti-angiogenic drugs within 3 months of screening; vision decrease due to causes other than DMO; proliferative diabetic retinopathy (unless regressed and currently inactive); ocular inflammation; cataract or other intraocular surgery within 3 months of screening, laser capsulotomy within 2 months of screening; aphakia; spherical equivalent of &gt;8 diopters; or any concurrent disease that would compromise visual acuity or require medical or surgical intervention during the study period: active iris neovascularization, vitreous hemorrhage, traction retinal detachment, or preretinal fibrosis involving the macula; visually significant vitreomacular traction or epiretinal membrane evident biomicroscopically or on OCT; history of idiopathic autoimmune uveitis; structural damage to the center of the macula that is likely to preclude improvement in visual acuity after the resolution of macular oedema; uncontrolled glaucoma or previous filtration surgery; infectious blepharitis, keratitis, scleritis, or conjunctivitis; or current treatment for serious systemic infection: uncontrolled diabetes mellitus; uncontrolled hypertension; history of cerebral vascular accident or myocardial infarction within 6 months; renal failure requiring dialysis or renal transplant; pregnancy or lactation; history of allergy to fluorescein or povidone iodine; only 1 functional eye (even if the eye met all other entry criteria); or an ocular condition in the fellow eye with a poorer prognosis than the study eye</p> <p><b>Age:</b> 60.7 to 64.0 years (SD 8.1 to 11.5)</p> <p><b>Sex:</b> % female 35.6% to 47.6%</p> <p><b>Diabetes type:</b> % type 2, 88.6% to 97.7%</p> <p><b>HbA1c:</b> 7.85 to 8.10 (SD 1.71 to 1.94)</p> <p><b>Baseline VA:</b> 57.6 to 59.9 (SD 10.1 to 12.5)</p> <p><b>Baseline CMT:</b> 426.1 µm to 456.6 µm (SD 111.8 to 152.4)</p> <p><b>Co morbidities:</b> history of any cardiac disease was twice as common in the VEGF Trap-Eye groups compared with the laser group.</p> | <p>Trial of VEGF Trap-Eye (VTE), randomized on a 1:1:1:1:1 basis</p> <p><b>Group 1 (IVVTE1, n=44 eyes):</b> IV VTE, 0.5 mg every 4 weeks</p> <p><b>Group 2 (IVVTE2, n=44 eyes):</b> IV VTE, 2 mg every 4 weeks</p> <p><b>Group 3 (IVVTE3, n=42 eyes):</b> IV VTE, 2 mg for 3 initial months then every 8 weeks</p> <p><b>Group 4 (IVVTE4, n=45 eyes):</b> IV VTE, 2 mg for 3 initial months then as needed</p> <p><b>Group 5 (L, n=44 eyes):</b> laser photocoagulation<br/><b>Laser Modified ETDRS protocol</b></p> | <p><b>At 6 months</b></p> <table border="1"> <thead> <tr> <th></th> <th>BCVA (letters)</th> <th>p</th> </tr> </thead> <tbody> <tr> <td><i>IVVTE1</i></td> <td>+8.6</td> <td>0.005 vs L</td> </tr> <tr> <td><i>IVVTE2</i></td> <td>+11.4</td> <td>&lt;0.0001 vs L</td> </tr> <tr> <td><i>IVVTE3</i></td> <td>+8.5</td> <td>0.008 vs L</td> </tr> <tr> <td><i>IVVTE3</i></td> <td>+10.3</td> <td>0.0004 vs L</td> </tr> <tr> <td><i>L</i></td> <td>+2.5</td> <td></td> </tr> </tbody> </table><br><table border="1"> <thead> <tr> <th></th> <th>plus ≥10 letters</th> <th></th> </tr> </thead> <tbody> <tr> <td><i>IVVTE1</i></td> <td>50%</td> <td>NR</td> </tr> <tr> <td><i>IVVTE2</i></td> <td>64%</td> <td>NR</td> </tr> <tr> <td><i>IVVTE3</i></td> <td>43%</td> <td>NR</td> </tr> <tr> <td><i>IVVTE3</i></td> <td>58%</td> <td>NR</td> </tr> <tr> <td><i>L</i></td> <td>32%</td> <td>NR</td> </tr> </tbody> </table><br><table border="1"> <thead> <tr> <th></th> <th>CMT(µm)</th> <th></th> </tr> </thead> <tbody> <tr> <td><i>IVVTE1</i></td> <td>-144.6</td> <td>0.0002 vs L</td> </tr> <tr> <td><i>IVVTE2</i></td> <td>-194.5</td> <td>&lt;0.0001 vs L</td> </tr> <tr> <td><i>IVVTE3</i></td> <td>-127.3</td> <td>0.007 vs L</td> </tr> <tr> <td><i>IVVTE3</i></td> <td>-153.3</td> <td>&lt;0.0001 vs L</td> </tr> <tr> <td><i>L</i></td> <td>-67.9</td> <td></td> </tr> </tbody> </table><br><p><b>At 12 months</b></p> <table border="1"> <thead> <tr> <th></th> <th>BCVA (letters)</th> <th>p</th> </tr> </thead> <tbody> <tr> <td><i>IVVTE1</i></td> <td>+11.0</td> <td>≤0.0001 vs L</td> </tr> <tr> <td><i>IVVTE2</i></td> <td>+13.1</td> <td>≤0.0001 vs L</td> </tr> <tr> <td><i>IVVTE3</i></td> <td>+9.7</td> <td>≤0.0001 vs L</td> </tr> <tr> <td><i>IVVTE3</i></td> <td>+12.0</td> <td>≤0.0001 vs L</td> </tr> <tr> <td><i>L</i></td> <td>-1.3</td> <td></td> </tr> </tbody> </table><br><table border="1"> <thead> <tr> <th></th> <th>plus ≥15 letters</th> <th></th> </tr> </thead> <tbody> <tr> <td><i>IVVTE1</i></td> <td>40.9%</td> <td>0.0031 vs L</td> </tr> <tr> <td><i>IVVTE2</i></td> <td>45.5%</td> <td>0.0007 vs L</td> </tr> <tr> <td><i>IVVTE3</i></td> <td>23.8%</td> <td>0.1608 vs L</td> </tr> <tr> <td><i>IVVTE3</i></td> <td>42.2%</td> <td>0.0016 vs L</td> </tr> <tr> <td><i>L</i></td> <td>11.4%</td> <td></td> </tr> </tbody> </table> |  | BCVA (letters) | p | <i>IVVTE1</i> | +8.6 | 0.005 vs L | <i>IVVTE2</i> | +11.4 | <0.0001 vs L | <i>IVVTE3</i> | +8.5 | 0.008 vs L | <i>IVVTE3</i> | +10.3 | 0.0004 vs L | <i>L</i> | +2.5 |  |  | plus ≥10 letters |  | <i>IVVTE1</i> | 50% | NR | <i>IVVTE2</i> | 64% | NR | <i>IVVTE3</i> | 43% | NR | <i>IVVTE3</i> | 58% | NR | <i>L</i> | 32% | NR |  | CMT(µm) |  | <i>IVVTE1</i> | -144.6 | 0.0002 vs L | <i>IVVTE2</i> | -194.5 | <0.0001 vs L | <i>IVVTE3</i> | -127.3 | 0.007 vs L | <i>IVVTE3</i> | -153.3 | <0.0001 vs L | <i>L</i> | -67.9 |  |  | BCVA (letters) | p | <i>IVVTE1</i> | +11.0 | ≤0.0001 vs L | <i>IVVTE2</i> | +13.1 | ≤0.0001 vs L | <i>IVVTE3</i> | +9.7 | ≤0.0001 vs L | <i>IVVTE3</i> | +12.0 | ≤0.0001 vs L | <i>L</i> | -1.3 |  |  | plus ≥15 letters |  | <i>IVVTE1</i> | 40.9% | 0.0031 vs L | <i>IVVTE2</i> | 45.5% | 0.0007 vs L | <i>IVVTE3</i> | 23.8% | 0.1608 vs L | <i>IVVTE3</i> | 42.2% | 0.0016 vs L | <i>L</i> | 11.4% |  |
|                                                                                                                                                                | BCVA (letters)                                                                                                                                                                                                                                                                                                                                                                                                                                                                                                                                                                                                                                                                                                                                                                                                                                                                                                                                                                                                                                                                                                                                                                                                                                                                                                                                                                                                                                                                                                                                                                                                                                                                                                                                                                                                                                                                                                                                                                                                                                                                                                                                                                                                                                                                                                                                                                                                                                                                                                                                                                                                                                                                                                          | p                                                                                                                                                                                                                                                                                                                                                                                                                                                                                                                    |                                                                                                                                                                                                                                                                                                                                                                                                                                                                                                                                                                                                                                                                                                                                                                                                                                                                                                                                                                                                                                                                                                                                                                                                                                                                                                                                                                                                                                                                                                                                                                                                                                                                                                                                                                                                                                                                                                                                                                                                                                                                                                                                                                                                                                                                                                                                                                                |  |                |   |               |      |            |               |       |              |               |      |            |               |       |             |          |      |  |  |                  |  |               |     |    |               |     |    |               |     |    |               |     |    |          |     |    |  |         |  |               |        |             |               |        |              |               |        |            |               |        |              |          |       |  |  |                |   |               |       |              |               |       |              |               |      |              |               |       |              |          |      |  |  |                  |  |               |       |             |               |       |             |               |       |             |               |       |             |          |       |  |
| <i>IVVTE1</i>                                                                                                                                                  | +8.6                                                                                                                                                                                                                                                                                                                                                                                                                                                                                                                                                                                                                                                                                                                                                                                                                                                                                                                                                                                                                                                                                                                                                                                                                                                                                                                                                                                                                                                                                                                                                                                                                                                                                                                                                                                                                                                                                                                                                                                                                                                                                                                                                                                                                                                                                                                                                                                                                                                                                                                                                                                                                                                                                                                    | 0.005 vs L                                                                                                                                                                                                                                                                                                                                                                                                                                                                                                           |                                                                                                                                                                                                                                                                                                                                                                                                                                                                                                                                                                                                                                                                                                                                                                                                                                                                                                                                                                                                                                                                                                                                                                                                                                                                                                                                                                                                                                                                                                                                                                                                                                                                                                                                                                                                                                                                                                                                                                                                                                                                                                                                                                                                                                                                                                                                                                                |  |                |   |               |      |            |               |       |              |               |      |            |               |       |             |          |      |  |  |                  |  |               |     |    |               |     |    |               |     |    |               |     |    |          |     |    |  |         |  |               |        |             |               |        |              |               |        |            |               |        |              |          |       |  |  |                |   |               |       |              |               |       |              |               |      |              |               |       |              |          |      |  |  |                  |  |               |       |             |               |       |             |               |       |             |               |       |             |          |       |  |
| <i>IVVTE2</i>                                                                                                                                                  | +11.4                                                                                                                                                                                                                                                                                                                                                                                                                                                                                                                                                                                                                                                                                                                                                                                                                                                                                                                                                                                                                                                                                                                                                                                                                                                                                                                                                                                                                                                                                                                                                                                                                                                                                                                                                                                                                                                                                                                                                                                                                                                                                                                                                                                                                                                                                                                                                                                                                                                                                                                                                                                                                                                                                                                   | <0.0001 vs L                                                                                                                                                                                                                                                                                                                                                                                                                                                                                                         |                                                                                                                                                                                                                                                                                                                                                                                                                                                                                                                                                                                                                                                                                                                                                                                                                                                                                                                                                                                                                                                                                                                                                                                                                                                                                                                                                                                                                                                                                                                                                                                                                                                                                                                                                                                                                                                                                                                                                                                                                                                                                                                                                                                                                                                                                                                                                                                |  |                |   |               |      |            |               |       |              |               |      |            |               |       |             |          |      |  |  |                  |  |               |     |    |               |     |    |               |     |    |               |     |    |          |     |    |  |         |  |               |        |             |               |        |              |               |        |            |               |        |              |          |       |  |  |                |   |               |       |              |               |       |              |               |      |              |               |       |              |          |      |  |  |                  |  |               |       |             |               |       |             |               |       |             |               |       |             |          |       |  |
| <i>IVVTE3</i>                                                                                                                                                  | +8.5                                                                                                                                                                                                                                                                                                                                                                                                                                                                                                                                                                                                                                                                                                                                                                                                                                                                                                                                                                                                                                                                                                                                                                                                                                                                                                                                                                                                                                                                                                                                                                                                                                                                                                                                                                                                                                                                                                                                                                                                                                                                                                                                                                                                                                                                                                                                                                                                                                                                                                                                                                                                                                                                                                                    | 0.008 vs L                                                                                                                                                                                                                                                                                                                                                                                                                                                                                                           |                                                                                                                                                                                                                                                                                                                                                                                                                                                                                                                                                                                                                                                                                                                                                                                                                                                                                                                                                                                                                                                                                                                                                                                                                                                                                                                                                                                                                                                                                                                                                                                                                                                                                                                                                                                                                                                                                                                                                                                                                                                                                                                                                                                                                                                                                                                                                                                |  |                |   |               |      |            |               |       |              |               |      |            |               |       |             |          |      |  |  |                  |  |               |     |    |               |     |    |               |     |    |               |     |    |          |     |    |  |         |  |               |        |             |               |        |              |               |        |            |               |        |              |          |       |  |  |                |   |               |       |              |               |       |              |               |      |              |               |       |              |          |      |  |  |                  |  |               |       |             |               |       |             |               |       |             |               |       |             |          |       |  |
| <i>IVVTE3</i>                                                                                                                                                  | +10.3                                                                                                                                                                                                                                                                                                                                                                                                                                                                                                                                                                                                                                                                                                                                                                                                                                                                                                                                                                                                                                                                                                                                                                                                                                                                                                                                                                                                                                                                                                                                                                                                                                                                                                                                                                                                                                                                                                                                                                                                                                                                                                                                                                                                                                                                                                                                                                                                                                                                                                                                                                                                                                                                                                                   | 0.0004 vs L                                                                                                                                                                                                                                                                                                                                                                                                                                                                                                          |                                                                                                                                                                                                                                                                                                                                                                                                                                                                                                                                                                                                                                                                                                                                                                                                                                                                                                                                                                                                                                                                                                                                                                                                                                                                                                                                                                                                                                                                                                                                                                                                                                                                                                                                                                                                                                                                                                                                                                                                                                                                                                                                                                                                                                                                                                                                                                                |  |                |   |               |      |            |               |       |              |               |      |            |               |       |             |          |      |  |  |                  |  |               |     |    |               |     |    |               |     |    |               |     |    |          |     |    |  |         |  |               |        |             |               |        |              |               |        |            |               |        |              |          |       |  |  |                |   |               |       |              |               |       |              |               |      |              |               |       |              |          |      |  |  |                  |  |               |       |             |               |       |             |               |       |             |               |       |             |          |       |  |
| <i>L</i>                                                                                                                                                       | +2.5                                                                                                                                                                                                                                                                                                                                                                                                                                                                                                                                                                                                                                                                                                                                                                                                                                                                                                                                                                                                                                                                                                                                                                                                                                                                                                                                                                                                                                                                                                                                                                                                                                                                                                                                                                                                                                                                                                                                                                                                                                                                                                                                                                                                                                                                                                                                                                                                                                                                                                                                                                                                                                                                                                                    |                                                                                                                                                                                                                                                                                                                                                                                                                                                                                                                      |                                                                                                                                                                                                                                                                                                                                                                                                                                                                                                                                                                                                                                                                                                                                                                                                                                                                                                                                                                                                                                                                                                                                                                                                                                                                                                                                                                                                                                                                                                                                                                                                                                                                                                                                                                                                                                                                                                                                                                                                                                                                                                                                                                                                                                                                                                                                                                                |  |                |   |               |      |            |               |       |              |               |      |            |               |       |             |          |      |  |  |                  |  |               |     |    |               |     |    |               |     |    |               |     |    |          |     |    |  |         |  |               |        |             |               |        |              |               |        |            |               |        |              |          |       |  |  |                |   |               |       |              |               |       |              |               |      |              |               |       |              |          |      |  |  |                  |  |               |       |             |               |       |             |               |       |             |               |       |             |          |       |  |
|                                                                                                                                                                | plus ≥10 letters                                                                                                                                                                                                                                                                                                                                                                                                                                                                                                                                                                                                                                                                                                                                                                                                                                                                                                                                                                                                                                                                                                                                                                                                                                                                                                                                                                                                                                                                                                                                                                                                                                                                                                                                                                                                                                                                                                                                                                                                                                                                                                                                                                                                                                                                                                                                                                                                                                                                                                                                                                                                                                                                                                        |                                                                                                                                                                                                                                                                                                                                                                                                                                                                                                                      |                                                                                                                                                                                                                                                                                                                                                                                                                                                                                                                                                                                                                                                                                                                                                                                                                                                                                                                                                                                                                                                                                                                                                                                                                                                                                                                                                                                                                                                                                                                                                                                                                                                                                                                                                                                                                                                                                                                                                                                                                                                                                                                                                                                                                                                                                                                                                                                |  |                |   |               |      |            |               |       |              |               |      |            |               |       |             |          |      |  |  |                  |  |               |     |    |               |     |    |               |     |    |               |     |    |          |     |    |  |         |  |               |        |             |               |        |              |               |        |            |               |        |              |          |       |  |  |                |   |               |       |              |               |       |              |               |      |              |               |       |              |          |      |  |  |                  |  |               |       |             |               |       |             |               |       |             |               |       |             |          |       |  |
| <i>IVVTE1</i>                                                                                                                                                  | 50%                                                                                                                                                                                                                                                                                                                                                                                                                                                                                                                                                                                                                                                                                                                                                                                                                                                                                                                                                                                                                                                                                                                                                                                                                                                                                                                                                                                                                                                                                                                                                                                                                                                                                                                                                                                                                                                                                                                                                                                                                                                                                                                                                                                                                                                                                                                                                                                                                                                                                                                                                                                                                                                                                                                     | NR                                                                                                                                                                                                                                                                                                                                                                                                                                                                                                                   |                                                                                                                                                                                                                                                                                                                                                                                                                                                                                                                                                                                                                                                                                                                                                                                                                                                                                                                                                                                                                                                                                                                                                                                                                                                                                                                                                                                                                                                                                                                                                                                                                                                                                                                                                                                                                                                                                                                                                                                                                                                                                                                                                                                                                                                                                                                                                                                |  |                |   |               |      |            |               |       |              |               |      |            |               |       |             |          |      |  |  |                  |  |               |     |    |               |     |    |               |     |    |               |     |    |          |     |    |  |         |  |               |        |             |               |        |              |               |        |            |               |        |              |          |       |  |  |                |   |               |       |              |               |       |              |               |      |              |               |       |              |          |      |  |  |                  |  |               |       |             |               |       |             |               |       |             |               |       |             |          |       |  |
| <i>IVVTE2</i>                                                                                                                                                  | 64%                                                                                                                                                                                                                                                                                                                                                                                                                                                                                                                                                                                                                                                                                                                                                                                                                                                                                                                                                                                                                                                                                                                                                                                                                                                                                                                                                                                                                                                                                                                                                                                                                                                                                                                                                                                                                                                                                                                                                                                                                                                                                                                                                                                                                                                                                                                                                                                                                                                                                                                                                                                                                                                                                                                     | NR                                                                                                                                                                                                                                                                                                                                                                                                                                                                                                                   |                                                                                                                                                                                                                                                                                                                                                                                                                                                                                                                                                                                                                                                                                                                                                                                                                                                                                                                                                                                                                                                                                                                                                                                                                                                                                                                                                                                                                                                                                                                                                                                                                                                                                                                                                                                                                                                                                                                                                                                                                                                                                                                                                                                                                                                                                                                                                                                |  |                |   |               |      |            |               |       |              |               |      |            |               |       |             |          |      |  |  |                  |  |               |     |    |               |     |    |               |     |    |               |     |    |          |     |    |  |         |  |               |        |             |               |        |              |               |        |            |               |        |              |          |       |  |  |                |   |               |       |              |               |       |              |               |      |              |               |       |              |          |      |  |  |                  |  |               |       |             |               |       |             |               |       |             |               |       |             |          |       |  |
| <i>IVVTE3</i>                                                                                                                                                  | 43%                                                                                                                                                                                                                                                                                                                                                                                                                                                                                                                                                                                                                                                                                                                                                                                                                                                                                                                                                                                                                                                                                                                                                                                                                                                                                                                                                                                                                                                                                                                                                                                                                                                                                                                                                                                                                                                                                                                                                                                                                                                                                                                                                                                                                                                                                                                                                                                                                                                                                                                                                                                                                                                                                                                     | NR                                                                                                                                                                                                                                                                                                                                                                                                                                                                                                                   |                                                                                                                                                                                                                                                                                                                                                                                                                                                                                                                                                                                                                                                                                                                                                                                                                                                                                                                                                                                                                                                                                                                                                                                                                                                                                                                                                                                                                                                                                                                                                                                                                                                                                                                                                                                                                                                                                                                                                                                                                                                                                                                                                                                                                                                                                                                                                                                |  |                |   |               |      |            |               |       |              |               |      |            |               |       |             |          |      |  |  |                  |  |               |     |    |               |     |    |               |     |    |               |     |    |          |     |    |  |         |  |               |        |             |               |        |              |               |        |            |               |        |              |          |       |  |  |                |   |               |       |              |               |       |              |               |      |              |               |       |              |          |      |  |  |                  |  |               |       |             |               |       |             |               |       |             |               |       |             |          |       |  |
| <i>IVVTE3</i>                                                                                                                                                  | 58%                                                                                                                                                                                                                                                                                                                                                                                                                                                                                                                                                                                                                                                                                                                                                                                                                                                                                                                                                                                                                                                                                                                                                                                                                                                                                                                                                                                                                                                                                                                                                                                                                                                                                                                                                                                                                                                                                                                                                                                                                                                                                                                                                                                                                                                                                                                                                                                                                                                                                                                                                                                                                                                                                                                     | NR                                                                                                                                                                                                                                                                                                                                                                                                                                                                                                                   |                                                                                                                                                                                                                                                                                                                                                                                                                                                                                                                                                                                                                                                                                                                                                                                                                                                                                                                                                                                                                                                                                                                                                                                                                                                                                                                                                                                                                                                                                                                                                                                                                                                                                                                                                                                                                                                                                                                                                                                                                                                                                                                                                                                                                                                                                                                                                                                |  |                |   |               |      |            |               |       |              |               |      |            |               |       |             |          |      |  |  |                  |  |               |     |    |               |     |    |               |     |    |               |     |    |          |     |    |  |         |  |               |        |             |               |        |              |               |        |            |               |        |              |          |       |  |  |                |   |               |       |              |               |       |              |               |      |              |               |       |              |          |      |  |  |                  |  |               |       |             |               |       |             |               |       |             |               |       |             |          |       |  |
| <i>L</i>                                                                                                                                                       | 32%                                                                                                                                                                                                                                                                                                                                                                                                                                                                                                                                                                                                                                                                                                                                                                                                                                                                                                                                                                                                                                                                                                                                                                                                                                                                                                                                                                                                                                                                                                                                                                                                                                                                                                                                                                                                                                                                                                                                                                                                                                                                                                                                                                                                                                                                                                                                                                                                                                                                                                                                                                                                                                                                                                                     | NR                                                                                                                                                                                                                                                                                                                                                                                                                                                                                                                   |                                                                                                                                                                                                                                                                                                                                                                                                                                                                                                                                                                                                                                                                                                                                                                                                                                                                                                                                                                                                                                                                                                                                                                                                                                                                                                                                                                                                                                                                                                                                                                                                                                                                                                                                                                                                                                                                                                                                                                                                                                                                                                                                                                                                                                                                                                                                                                                |  |                |   |               |      |            |               |       |              |               |      |            |               |       |             |          |      |  |  |                  |  |               |     |    |               |     |    |               |     |    |               |     |    |          |     |    |  |         |  |               |        |             |               |        |              |               |        |            |               |        |              |          |       |  |  |                |   |               |       |              |               |       |              |               |      |              |               |       |              |          |      |  |  |                  |  |               |       |             |               |       |             |               |       |             |               |       |             |          |       |  |
|                                                                                                                                                                | CMT(µm)                                                                                                                                                                                                                                                                                                                                                                                                                                                                                                                                                                                                                                                                                                                                                                                                                                                                                                                                                                                                                                                                                                                                                                                                                                                                                                                                                                                                                                                                                                                                                                                                                                                                                                                                                                                                                                                                                                                                                                                                                                                                                                                                                                                                                                                                                                                                                                                                                                                                                                                                                                                                                                                                                                                 |                                                                                                                                                                                                                                                                                                                                                                                                                                                                                                                      |                                                                                                                                                                                                                                                                                                                                                                                                                                                                                                                                                                                                                                                                                                                                                                                                                                                                                                                                                                                                                                                                                                                                                                                                                                                                                                                                                                                                                                                                                                                                                                                                                                                                                                                                                                                                                                                                                                                                                                                                                                                                                                                                                                                                                                                                                                                                                                                |  |                |   |               |      |            |               |       |              |               |      |            |               |       |             |          |      |  |  |                  |  |               |     |    |               |     |    |               |     |    |               |     |    |          |     |    |  |         |  |               |        |             |               |        |              |               |        |            |               |        |              |          |       |  |  |                |   |               |       |              |               |       |              |               |      |              |               |       |              |          |      |  |  |                  |  |               |       |             |               |       |             |               |       |             |               |       |             |          |       |  |
| <i>IVVTE1</i>                                                                                                                                                  | -144.6                                                                                                                                                                                                                                                                                                                                                                                                                                                                                                                                                                                                                                                                                                                                                                                                                                                                                                                                                                                                                                                                                                                                                                                                                                                                                                                                                                                                                                                                                                                                                                                                                                                                                                                                                                                                                                                                                                                                                                                                                                                                                                                                                                                                                                                                                                                                                                                                                                                                                                                                                                                                                                                                                                                  | 0.0002 vs L                                                                                                                                                                                                                                                                                                                                                                                                                                                                                                          |                                                                                                                                                                                                                                                                                                                                                                                                                                                                                                                                                                                                                                                                                                                                                                                                                                                                                                                                                                                                                                                                                                                                                                                                                                                                                                                                                                                                                                                                                                                                                                                                                                                                                                                                                                                                                                                                                                                                                                                                                                                                                                                                                                                                                                                                                                                                                                                |  |                |   |               |      |            |               |       |              |               |      |            |               |       |             |          |      |  |  |                  |  |               |     |    |               |     |    |               |     |    |               |     |    |          |     |    |  |         |  |               |        |             |               |        |              |               |        |            |               |        |              |          |       |  |  |                |   |               |       |              |               |       |              |               |      |              |               |       |              |          |      |  |  |                  |  |               |       |             |               |       |             |               |       |             |               |       |             |          |       |  |
| <i>IVVTE2</i>                                                                                                                                                  | -194.5                                                                                                                                                                                                                                                                                                                                                                                                                                                                                                                                                                                                                                                                                                                                                                                                                                                                                                                                                                                                                                                                                                                                                                                                                                                                                                                                                                                                                                                                                                                                                                                                                                                                                                                                                                                                                                                                                                                                                                                                                                                                                                                                                                                                                                                                                                                                                                                                                                                                                                                                                                                                                                                                                                                  | <0.0001 vs L                                                                                                                                                                                                                                                                                                                                                                                                                                                                                                         |                                                                                                                                                                                                                                                                                                                                                                                                                                                                                                                                                                                                                                                                                                                                                                                                                                                                                                                                                                                                                                                                                                                                                                                                                                                                                                                                                                                                                                                                                                                                                                                                                                                                                                                                                                                                                                                                                                                                                                                                                                                                                                                                                                                                                                                                                                                                                                                |  |                |   |               |      |            |               |       |              |               |      |            |               |       |             |          |      |  |  |                  |  |               |     |    |               |     |    |               |     |    |               |     |    |          |     |    |  |         |  |               |        |             |               |        |              |               |        |            |               |        |              |          |       |  |  |                |   |               |       |              |               |       |              |               |      |              |               |       |              |          |      |  |  |                  |  |               |       |             |               |       |             |               |       |             |               |       |             |          |       |  |
| <i>IVVTE3</i>                                                                                                                                                  | -127.3                                                                                                                                                                                                                                                                                                                                                                                                                                                                                                                                                                                                                                                                                                                                                                                                                                                                                                                                                                                                                                                                                                                                                                                                                                                                                                                                                                                                                                                                                                                                                                                                                                                                                                                                                                                                                                                                                                                                                                                                                                                                                                                                                                                                                                                                                                                                                                                                                                                                                                                                                                                                                                                                                                                  | 0.007 vs L                                                                                                                                                                                                                                                                                                                                                                                                                                                                                                           |                                                                                                                                                                                                                                                                                                                                                                                                                                                                                                                                                                                                                                                                                                                                                                                                                                                                                                                                                                                                                                                                                                                                                                                                                                                                                                                                                                                                                                                                                                                                                                                                                                                                                                                                                                                                                                                                                                                                                                                                                                                                                                                                                                                                                                                                                                                                                                                |  |                |   |               |      |            |               |       |              |               |      |            |               |       |             |          |      |  |  |                  |  |               |     |    |               |     |    |               |     |    |               |     |    |          |     |    |  |         |  |               |        |             |               |        |              |               |        |            |               |        |              |          |       |  |  |                |   |               |       |              |               |       |              |               |      |              |               |       |              |          |      |  |  |                  |  |               |       |             |               |       |             |               |       |             |               |       |             |          |       |  |
| <i>IVVTE3</i>                                                                                                                                                  | -153.3                                                                                                                                                                                                                                                                                                                                                                                                                                                                                                                                                                                                                                                                                                                                                                                                                                                                                                                                                                                                                                                                                                                                                                                                                                                                                                                                                                                                                                                                                                                                                                                                                                                                                                                                                                                                                                                                                                                                                                                                                                                                                                                                                                                                                                                                                                                                                                                                                                                                                                                                                                                                                                                                                                                  | <0.0001 vs L                                                                                                                                                                                                                                                                                                                                                                                                                                                                                                         |                                                                                                                                                                                                                                                                                                                                                                                                                                                                                                                                                                                                                                                                                                                                                                                                                                                                                                                                                                                                                                                                                                                                                                                                                                                                                                                                                                                                                                                                                                                                                                                                                                                                                                                                                                                                                                                                                                                                                                                                                                                                                                                                                                                                                                                                                                                                                                                |  |                |   |               |      |            |               |       |              |               |      |            |               |       |             |          |      |  |  |                  |  |               |     |    |               |     |    |               |     |    |               |     |    |          |     |    |  |         |  |               |        |             |               |        |              |               |        |            |               |        |              |          |       |  |  |                |   |               |       |              |               |       |              |               |      |              |               |       |              |          |      |  |  |                  |  |               |       |             |               |       |             |               |       |             |               |       |             |          |       |  |
| <i>L</i>                                                                                                                                                       | -67.9                                                                                                                                                                                                                                                                                                                                                                                                                                                                                                                                                                                                                                                                                                                                                                                                                                                                                                                                                                                                                                                                                                                                                                                                                                                                                                                                                                                                                                                                                                                                                                                                                                                                                                                                                                                                                                                                                                                                                                                                                                                                                                                                                                                                                                                                                                                                                                                                                                                                                                                                                                                                                                                                                                                   |                                                                                                                                                                                                                                                                                                                                                                                                                                                                                                                      |                                                                                                                                                                                                                                                                                                                                                                                                                                                                                                                                                                                                                                                                                                                                                                                                                                                                                                                                                                                                                                                                                                                                                                                                                                                                                                                                                                                                                                                                                                                                                                                                                                                                                                                                                                                                                                                                                                                                                                                                                                                                                                                                                                                                                                                                                                                                                                                |  |                |   |               |      |            |               |       |              |               |      |            |               |       |             |          |      |  |  |                  |  |               |     |    |               |     |    |               |     |    |               |     |    |          |     |    |  |         |  |               |        |             |               |        |              |               |        |            |               |        |              |          |       |  |  |                |   |               |       |              |               |       |              |               |      |              |               |       |              |          |      |  |  |                  |  |               |       |             |               |       |             |               |       |             |               |       |             |          |       |  |
|                                                                                                                                                                | BCVA (letters)                                                                                                                                                                                                                                                                                                                                                                                                                                                                                                                                                                                                                                                                                                                                                                                                                                                                                                                                                                                                                                                                                                                                                                                                                                                                                                                                                                                                                                                                                                                                                                                                                                                                                                                                                                                                                                                                                                                                                                                                                                                                                                                                                                                                                                                                                                                                                                                                                                                                                                                                                                                                                                                                                                          | p                                                                                                                                                                                                                                                                                                                                                                                                                                                                                                                    |                                                                                                                                                                                                                                                                                                                                                                                                                                                                                                                                                                                                                                                                                                                                                                                                                                                                                                                                                                                                                                                                                                                                                                                                                                                                                                                                                                                                                                                                                                                                                                                                                                                                                                                                                                                                                                                                                                                                                                                                                                                                                                                                                                                                                                                                                                                                                                                |  |                |   |               |      |            |               |       |              |               |      |            |               |       |             |          |      |  |  |                  |  |               |     |    |               |     |    |               |     |    |               |     |    |          |     |    |  |         |  |               |        |             |               |        |              |               |        |            |               |        |              |          |       |  |  |                |   |               |       |              |               |       |              |               |      |              |               |       |              |          |      |  |  |                  |  |               |       |             |               |       |             |               |       |             |               |       |             |          |       |  |
| <i>IVVTE1</i>                                                                                                                                                  | +11.0                                                                                                                                                                                                                                                                                                                                                                                                                                                                                                                                                                                                                                                                                                                                                                                                                                                                                                                                                                                                                                                                                                                                                                                                                                                                                                                                                                                                                                                                                                                                                                                                                                                                                                                                                                                                                                                                                                                                                                                                                                                                                                                                                                                                                                                                                                                                                                                                                                                                                                                                                                                                                                                                                                                   | ≤0.0001 vs L                                                                                                                                                                                                                                                                                                                                                                                                                                                                                                         |                                                                                                                                                                                                                                                                                                                                                                                                                                                                                                                                                                                                                                                                                                                                                                                                                                                                                                                                                                                                                                                                                                                                                                                                                                                                                                                                                                                                                                                                                                                                                                                                                                                                                                                                                                                                                                                                                                                                                                                                                                                                                                                                                                                                                                                                                                                                                                                |  |                |   |               |      |            |               |       |              |               |      |            |               |       |             |          |      |  |  |                  |  |               |     |    |               |     |    |               |     |    |               |     |    |          |     |    |  |         |  |               |        |             |               |        |              |               |        |            |               |        |              |          |       |  |  |                |   |               |       |              |               |       |              |               |      |              |               |       |              |          |      |  |  |                  |  |               |       |             |               |       |             |               |       |             |               |       |             |          |       |  |
| <i>IVVTE2</i>                                                                                                                                                  | +13.1                                                                                                                                                                                                                                                                                                                                                                                                                                                                                                                                                                                                                                                                                                                                                                                                                                                                                                                                                                                                                                                                                                                                                                                                                                                                                                                                                                                                                                                                                                                                                                                                                                                                                                                                                                                                                                                                                                                                                                                                                                                                                                                                                                                                                                                                                                                                                                                                                                                                                                                                                                                                                                                                                                                   | ≤0.0001 vs L                                                                                                                                                                                                                                                                                                                                                                                                                                                                                                         |                                                                                                                                                                                                                                                                                                                                                                                                                                                                                                                                                                                                                                                                                                                                                                                                                                                                                                                                                                                                                                                                                                                                                                                                                                                                                                                                                                                                                                                                                                                                                                                                                                                                                                                                                                                                                                                                                                                                                                                                                                                                                                                                                                                                                                                                                                                                                                                |  |                |   |               |      |            |               |       |              |               |      |            |               |       |             |          |      |  |  |                  |  |               |     |    |               |     |    |               |     |    |               |     |    |          |     |    |  |         |  |               |        |             |               |        |              |               |        |            |               |        |              |          |       |  |  |                |   |               |       |              |               |       |              |               |      |              |               |       |              |          |      |  |  |                  |  |               |       |             |               |       |             |               |       |             |               |       |             |          |       |  |
| <i>IVVTE3</i>                                                                                                                                                  | +9.7                                                                                                                                                                                                                                                                                                                                                                                                                                                                                                                                                                                                                                                                                                                                                                                                                                                                                                                                                                                                                                                                                                                                                                                                                                                                                                                                                                                                                                                                                                                                                                                                                                                                                                                                                                                                                                                                                                                                                                                                                                                                                                                                                                                                                                                                                                                                                                                                                                                                                                                                                                                                                                                                                                                    | ≤0.0001 vs L                                                                                                                                                                                                                                                                                                                                                                                                                                                                                                         |                                                                                                                                                                                                                                                                                                                                                                                                                                                                                                                                                                                                                                                                                                                                                                                                                                                                                                                                                                                                                                                                                                                                                                                                                                                                                                                                                                                                                                                                                                                                                                                                                                                                                                                                                                                                                                                                                                                                                                                                                                                                                                                                                                                                                                                                                                                                                                                |  |                |   |               |      |            |               |       |              |               |      |            |               |       |             |          |      |  |  |                  |  |               |     |    |               |     |    |               |     |    |               |     |    |          |     |    |  |         |  |               |        |             |               |        |              |               |        |            |               |        |              |          |       |  |  |                |   |               |       |              |               |       |              |               |      |              |               |       |              |          |      |  |  |                  |  |               |       |             |               |       |             |               |       |             |               |       |             |          |       |  |
| <i>IVVTE3</i>                                                                                                                                                  | +12.0                                                                                                                                                                                                                                                                                                                                                                                                                                                                                                                                                                                                                                                                                                                                                                                                                                                                                                                                                                                                                                                                                                                                                                                                                                                                                                                                                                                                                                                                                                                                                                                                                                                                                                                                                                                                                                                                                                                                                                                                                                                                                                                                                                                                                                                                                                                                                                                                                                                                                                                                                                                                                                                                                                                   | ≤0.0001 vs L                                                                                                                                                                                                                                                                                                                                                                                                                                                                                                         |                                                                                                                                                                                                                                                                                                                                                                                                                                                                                                                                                                                                                                                                                                                                                                                                                                                                                                                                                                                                                                                                                                                                                                                                                                                                                                                                                                                                                                                                                                                                                                                                                                                                                                                                                                                                                                                                                                                                                                                                                                                                                                                                                                                                                                                                                                                                                                                |  |                |   |               |      |            |               |       |              |               |      |            |               |       |             |          |      |  |  |                  |  |               |     |    |               |     |    |               |     |    |               |     |    |          |     |    |  |         |  |               |        |             |               |        |              |               |        |            |               |        |              |          |       |  |  |                |   |               |       |              |               |       |              |               |      |              |               |       |              |          |      |  |  |                  |  |               |       |             |               |       |             |               |       |             |               |       |             |          |       |  |
| <i>L</i>                                                                                                                                                       | -1.3                                                                                                                                                                                                                                                                                                                                                                                                                                                                                                                                                                                                                                                                                                                                                                                                                                                                                                                                                                                                                                                                                                                                                                                                                                                                                                                                                                                                                                                                                                                                                                                                                                                                                                                                                                                                                                                                                                                                                                                                                                                                                                                                                                                                                                                                                                                                                                                                                                                                                                                                                                                                                                                                                                                    |                                                                                                                                                                                                                                                                                                                                                                                                                                                                                                                      |                                                                                                                                                                                                                                                                                                                                                                                                                                                                                                                                                                                                                                                                                                                                                                                                                                                                                                                                                                                                                                                                                                                                                                                                                                                                                                                                                                                                                                                                                                                                                                                                                                                                                                                                                                                                                                                                                                                                                                                                                                                                                                                                                                                                                                                                                                                                                                                |  |                |   |               |      |            |               |       |              |               |      |            |               |       |             |          |      |  |  |                  |  |               |     |    |               |     |    |               |     |    |               |     |    |          |     |    |  |         |  |               |        |             |               |        |              |               |        |            |               |        |              |          |       |  |  |                |   |               |       |              |               |       |              |               |      |              |               |       |              |          |      |  |  |                  |  |               |       |             |               |       |             |               |       |             |               |       |             |          |       |  |
|                                                                                                                                                                | plus ≥15 letters                                                                                                                                                                                                                                                                                                                                                                                                                                                                                                                                                                                                                                                                                                                                                                                                                                                                                                                                                                                                                                                                                                                                                                                                                                                                                                                                                                                                                                                                                                                                                                                                                                                                                                                                                                                                                                                                                                                                                                                                                                                                                                                                                                                                                                                                                                                                                                                                                                                                                                                                                                                                                                                                                                        |                                                                                                                                                                                                                                                                                                                                                                                                                                                                                                                      |                                                                                                                                                                                                                                                                                                                                                                                                                                                                                                                                                                                                                                                                                                                                                                                                                                                                                                                                                                                                                                                                                                                                                                                                                                                                                                                                                                                                                                                                                                                                                                                                                                                                                                                                                                                                                                                                                                                                                                                                                                                                                                                                                                                                                                                                                                                                                                                |  |                |   |               |      |            |               |       |              |               |      |            |               |       |             |          |      |  |  |                  |  |               |     |    |               |     |    |               |     |    |               |     |    |          |     |    |  |         |  |               |        |             |               |        |              |               |        |            |               |        |              |          |       |  |  |                |   |               |       |              |               |       |              |               |      |              |               |       |              |          |      |  |  |                  |  |               |       |             |               |       |             |               |       |             |               |       |             |          |       |  |
| <i>IVVTE1</i>                                                                                                                                                  | 40.9%                                                                                                                                                                                                                                                                                                                                                                                                                                                                                                                                                                                                                                                                                                                                                                                                                                                                                                                                                                                                                                                                                                                                                                                                                                                                                                                                                                                                                                                                                                                                                                                                                                                                                                                                                                                                                                                                                                                                                                                                                                                                                                                                                                                                                                                                                                                                                                                                                                                                                                                                                                                                                                                                                                                   | 0.0031 vs L                                                                                                                                                                                                                                                                                                                                                                                                                                                                                                          |                                                                                                                                                                                                                                                                                                                                                                                                                                                                                                                                                                                                                                                                                                                                                                                                                                                                                                                                                                                                                                                                                                                                                                                                                                                                                                                                                                                                                                                                                                                                                                                                                                                                                                                                                                                                                                                                                                                                                                                                                                                                                                                                                                                                                                                                                                                                                                                |  |                |   |               |      |            |               |       |              |               |      |            |               |       |             |          |      |  |  |                  |  |               |     |    |               |     |    |               |     |    |               |     |    |          |     |    |  |         |  |               |        |             |               |        |              |               |        |            |               |        |              |          |       |  |  |                |   |               |       |              |               |       |              |               |      |              |               |       |              |          |      |  |  |                  |  |               |       |             |               |       |             |               |       |             |               |       |             |          |       |  |
| <i>IVVTE2</i>                                                                                                                                                  | 45.5%                                                                                                                                                                                                                                                                                                                                                                                                                                                                                                                                                                                                                                                                                                                                                                                                                                                                                                                                                                                                                                                                                                                                                                                                                                                                                                                                                                                                                                                                                                                                                                                                                                                                                                                                                                                                                                                                                                                                                                                                                                                                                                                                                                                                                                                                                                                                                                                                                                                                                                                                                                                                                                                                                                                   | 0.0007 vs L                                                                                                                                                                                                                                                                                                                                                                                                                                                                                                          |                                                                                                                                                                                                                                                                                                                                                                                                                                                                                                                                                                                                                                                                                                                                                                                                                                                                                                                                                                                                                                                                                                                                                                                                                                                                                                                                                                                                                                                                                                                                                                                                                                                                                                                                                                                                                                                                                                                                                                                                                                                                                                                                                                                                                                                                                                                                                                                |  |                |   |               |      |            |               |       |              |               |      |            |               |       |             |          |      |  |  |                  |  |               |     |    |               |     |    |               |     |    |               |     |    |          |     |    |  |         |  |               |        |             |               |        |              |               |        |            |               |        |              |          |       |  |  |                |   |               |       |              |               |       |              |               |      |              |               |       |              |          |      |  |  |                  |  |               |       |             |               |       |             |               |       |             |               |       |             |          |       |  |
| <i>IVVTE3</i>                                                                                                                                                  | 23.8%                                                                                                                                                                                                                                                                                                                                                                                                                                                                                                                                                                                                                                                                                                                                                                                                                                                                                                                                                                                                                                                                                                                                                                                                                                                                                                                                                                                                                                                                                                                                                                                                                                                                                                                                                                                                                                                                                                                                                                                                                                                                                                                                                                                                                                                                                                                                                                                                                                                                                                                                                                                                                                                                                                                   | 0.1608 vs L                                                                                                                                                                                                                                                                                                                                                                                                                                                                                                          |                                                                                                                                                                                                                                                                                                                                                                                                                                                                                                                                                                                                                                                                                                                                                                                                                                                                                                                                                                                                                                                                                                                                                                                                                                                                                                                                                                                                                                                                                                                                                                                                                                                                                                                                                                                                                                                                                                                                                                                                                                                                                                                                                                                                                                                                                                                                                                                |  |                |   |               |      |            |               |       |              |               |      |            |               |       |             |          |      |  |  |                  |  |               |     |    |               |     |    |               |     |    |               |     |    |          |     |    |  |         |  |               |        |             |               |        |              |               |        |            |               |        |              |          |       |  |  |                |   |               |       |              |               |       |              |               |      |              |               |       |              |          |      |  |  |                  |  |               |       |             |               |       |             |               |       |             |               |       |             |          |       |  |
| <i>IVVTE3</i>                                                                                                                                                  | 42.2%                                                                                                                                                                                                                                                                                                                                                                                                                                                                                                                                                                                                                                                                                                                                                                                                                                                                                                                                                                                                                                                                                                                                                                                                                                                                                                                                                                                                                                                                                                                                                                                                                                                                                                                                                                                                                                                                                                                                                                                                                                                                                                                                                                                                                                                                                                                                                                                                                                                                                                                                                                                                                                                                                                                   | 0.0016 vs L                                                                                                                                                                                                                                                                                                                                                                                                                                                                                                          |                                                                                                                                                                                                                                                                                                                                                                                                                                                                                                                                                                                                                                                                                                                                                                                                                                                                                                                                                                                                                                                                                                                                                                                                                                                                                                                                                                                                                                                                                                                                                                                                                                                                                                                                                                                                                                                                                                                                                                                                                                                                                                                                                                                                                                                                                                                                                                                |  |                |   |               |      |            |               |       |              |               |      |            |               |       |             |          |      |  |  |                  |  |               |     |    |               |     |    |               |     |    |               |     |    |          |     |    |  |         |  |               |        |             |               |        |              |               |        |            |               |        |              |          |       |  |  |                |   |               |       |              |               |       |              |               |      |              |               |       |              |          |      |  |  |                  |  |               |       |             |               |       |             |               |       |             |               |       |             |          |       |  |
| <i>L</i>                                                                                                                                                       | 11.4%                                                                                                                                                                                                                                                                                                                                                                                                                                                                                                                                                                                                                                                                                                                                                                                                                                                                                                                                                                                                                                                                                                                                                                                                                                                                                                                                                                                                                                                                                                                                                                                                                                                                                                                                                                                                                                                                                                                                                                                                                                                                                                                                                                                                                                                                                                                                                                                                                                                                                                                                                                                                                                                                                                                   |                                                                                                                                                                                                                                                                                                                                                                                                                                                                                                                      |                                                                                                                                                                                                                                                                                                                                                                                                                                                                                                                                                                                                                                                                                                                                                                                                                                                                                                                                                                                                                                                                                                                                                                                                                                                                                                                                                                                                                                                                                                                                                                                                                                                                                                                                                                                                                                                                                                                                                                                                                                                                                                                                                                                                                                                                                                                                                                                |  |                |   |               |      |            |               |       |              |               |      |            |               |       |             |          |      |  |  |                  |  |               |     |    |               |     |    |               |     |    |               |     |    |          |     |    |  |         |  |               |        |             |               |        |              |               |        |            |               |        |              |          |       |  |  |                |   |               |       |              |               |       |              |               |      |              |               |       |              |          |      |  |  |                  |  |               |       |             |               |       |             |               |       |             |               |       |             |          |       |  |



1  
2  
3  
4  
5  
6  
7  
8  
9  
10  
11  
12  
13  
14  
15  
16  
17  
18  
19  
20  
21  
22  
23  
24  
25  
26  
27  
28  
29  
30  
31  
32  
33  
34  
35  
36  
37  
38  
39  
40  
41  
42  
43  
44  
45  
46  
47  
48  
49

| Study | Participants and baseline values | Intervention | Outcome (change from baseline at study end) |                      |
|-------|----------------------------------|--------------|---------------------------------------------|----------------------|
|       |                                  |              | <b>plus ≥10 letters</b>                     |                      |
|       |                                  |              | <i>IVVTE1</i>                               | 57% 0.0031 vs L      |
|       |                                  |              | <i>IVVTE2</i>                               | 71% 0.0007 vs L      |
|       |                                  |              | <i>IVVTE3</i>                               | 45% 0.1608 vs L      |
|       |                                  |              | <i>IVVTE3</i>                               | 62% 0.0016 vs L      |
|       |                                  |              | <b>L</b>                                    |                      |
|       |                                  |              | <b>CMT(μm)</b>                              |                      |
|       |                                  |              | <i>IVVTE1</i>                               | -165.4 < 0.0001 vs L |
|       |                                  |              | <i>IVVTE2</i>                               | -227.4 < 0.0001 vs L |
|       |                                  |              | <i>IVVTE3</i>                               | -187.8 < 0.0001 vs L |
|       |                                  |              | <i>IVVTE3</i>                               | -180.3 < 0.0001 vs L |
|       |                                  |              | <b>L</b>                                    | -58.4                |

Abbreviations: See table 2

For peer review only

**Table 56: Dexamethasone and fluocinolone studies**

| Study                                                                                                                                                      | Participants and baseline values                                                                                                                                                                                                                                                                                                                                                                                                                                                                                                                                                                                                                                                                                                                                                                                                                                                                                                                                                                      | Intervention                                                                                                                                                                                                                                                                                                                                                                                                                                                                                                                                                                                                           | Outcome (change from baseline at study end)                                                                                                                                                                                                                                                                                                                                                                                                                                                                                                                                                                                                                                                                                                                                                                                                                                                                                                                                                                                                                                                                                                                                                      |  |                        |   |               |             |         |               |     |            |          |     |  |  |                       |   |               |                |                      |               |                  |                |          |                |  |  |                        |   |               |             |         |               |             |         |          |             |  |
|------------------------------------------------------------------------------------------------------------------------------------------------------------|-------------------------------------------------------------------------------------------------------------------------------------------------------------------------------------------------------------------------------------------------------------------------------------------------------------------------------------------------------------------------------------------------------------------------------------------------------------------------------------------------------------------------------------------------------------------------------------------------------------------------------------------------------------------------------------------------------------------------------------------------------------------------------------------------------------------------------------------------------------------------------------------------------------------------------------------------------------------------------------------------------|------------------------------------------------------------------------------------------------------------------------------------------------------------------------------------------------------------------------------------------------------------------------------------------------------------------------------------------------------------------------------------------------------------------------------------------------------------------------------------------------------------------------------------------------------------------------------------------------------------------------|--------------------------------------------------------------------------------------------------------------------------------------------------------------------------------------------------------------------------------------------------------------------------------------------------------------------------------------------------------------------------------------------------------------------------------------------------------------------------------------------------------------------------------------------------------------------------------------------------------------------------------------------------------------------------------------------------------------------------------------------------------------------------------------------------------------------------------------------------------------------------------------------------------------------------------------------------------------------------------------------------------------------------------------------------------------------------------------------------------------------------------------------------------------------------------------------------|--|------------------------|---|---------------|-------------|---------|---------------|-----|------------|----------|-----|--|--|-----------------------|---|---------------|----------------|----------------------|---------------|------------------|----------------|----------|----------------|--|--|------------------------|---|---------------|-------------|---------|---------------|-------------|---------|----------|-------------|--|
| <i>Dexamethasone</i>                                                                                                                                       |                                                                                                                                                                                                                                                                                                                                                                                                                                                                                                                                                                                                                                                                                                                                                                                                                                                                                                                                                                                                       |                                                                                                                                                                                                                                                                                                                                                                                                                                                                                                                                                                                                                        |                                                                                                                                                                                                                                                                                                                                                                                                                                                                                                                                                                                                                                                                                                                                                                                                                                                                                                                                                                                                                                                                                                                                                                                                  |  |                        |   |               |             |         |               |     |            |          |     |  |  |                       |   |               |                |                      |               |                  |                |          |                |  |  |                        |   |               |             |         |               |             |         |          |             |  |
| <b>Callanan 2011</b> USA[44]<br><b>Design:</b> 2-arm RCT<br><b>Follow-up:</b> 12 months                                                                    | N: 253 eyes of 253 patients<br><b>Inclusion criteria:</b> diffuse DMO, CMT $\geq 275$ $\mu\text{m}$ , BCVA $\geq 34$ and $\leq 70$ letters<br><b>Exclusion criteria:</b> not reported<br><b>Age:</b> not reported<br><b>Sex:</b> not reported<br><b>Diabetes type:</b> not reported<br><b>HbA1c:</b> not reported<br><b>Baseline VA:</b> not reported<br><b>Baseline CMT:</b> not reported<br><b>Comorbidities:</b> not reported                                                                                                                                                                                                                                                                                                                                                                                                                                                                                                                                                                      | <b>Group 1 (DIL, n=126 eyes):</b> dexamethasone IV implant followed by laser photocoagulation after 1 month (mean 1.6 implants; 78.6% completion)<br><b>Group 2 (L, n=127 eyes):</b> laser alone (79.5% completion)<br><b>Regimen for all groups:</b> if needed, patients were retreated with the dexamethasone implant at months 6 or 9, and with laser at months 4, 7, and 10; mean 2.2 laser treatments per patient<br><b>Laser protocol</b> not reported                                                                                                                                                           | <b>At 12 months BCVA:</b><br><table border="1"> <thead> <tr> <th></th> <th>plus <math>\geq 10</math> letters</th> <th>p</th> </tr> </thead> <tbody> <tr> <td><i>DIL</i></td> <td>28%</td> <td>NS vs L</td> </tr> <tr> <td><i>L</i></td> <td>24%</td> <td></td> </tr> </tbody> </table> <ul style="list-style-type: none"> <li>patients in DIL group had significantly greater increases in BCVA from baseline than patients in the laser group (<math>p &lt; 0.05</math>) at months 1 to 9 only</li> </ul> <b>CMT (OCT):</b> <ul style="list-style-type: none"> <li>patients in DIL group had significantly greater mean reductions from baseline in CMT at months 1 and 6 only (<math>p &lt; 0.001</math>)</li> </ul>                                                                                                                                                                                                                                                                                                                                                                                                                                                                           |  | plus $\geq 10$ letters | p | <i>DIL</i>    | 28%         | NS vs L | <i>L</i>      | 24% |            |          |     |  |  |                       |   |               |                |                      |               |                  |                |          |                |  |  |                        |   |               |             |         |               |             |         |          |             |  |
|                                                                                                                                                            | plus $\geq 10$ letters                                                                                                                                                                                                                                                                                                                                                                                                                                                                                                                                                                                                                                                                                                                                                                                                                                                                                                                                                                                | p                                                                                                                                                                                                                                                                                                                                                                                                                                                                                                                                                                                                                      |                                                                                                                                                                                                                                                                                                                                                                                                                                                                                                                                                                                                                                                                                                                                                                                                                                                                                                                                                                                                                                                                                                                                                                                                  |  |                        |   |               |             |         |               |     |            |          |     |  |  |                       |   |               |                |                      |               |                  |                |          |                |  |  |                        |   |               |             |         |               |             |         |          |             |  |
| <i>DIL</i>                                                                                                                                                 | 28%                                                                                                                                                                                                                                                                                                                                                                                                                                                                                                                                                                                                                                                                                                                                                                                                                                                                                                                                                                                                   | NS vs L                                                                                                                                                                                                                                                                                                                                                                                                                                                                                                                                                                                                                |                                                                                                                                                                                                                                                                                                                                                                                                                                                                                                                                                                                                                                                                                                                                                                                                                                                                                                                                                                                                                                                                                                                                                                                                  |  |                        |   |               |             |         |               |     |            |          |     |  |  |                       |   |               |                |                      |               |                  |                |          |                |  |  |                        |   |               |             |         |               |             |         |          |             |  |
| <i>L</i>                                                                                                                                                   | 24%                                                                                                                                                                                                                                                                                                                                                                                                                                                                                                                                                                                                                                                                                                                                                                                                                                                                                                                                                                                                   |                                                                                                                                                                                                                                                                                                                                                                                                                                                                                                                                                                                                                        |                                                                                                                                                                                                                                                                                                                                                                                                                                                                                                                                                                                                                                                                                                                                                                                                                                                                                                                                                                                                                                                                                                                                                                                                  |  |                        |   |               |             |         |               |     |            |          |     |  |  |                       |   |               |                |                      |               |                  |                |          |                |  |  |                        |   |               |             |         |               |             |         |          |             |  |
| <b>Haller 2010</b> [59]<br>USA<br>Multicenter<br><br><b>Design:</b> 3-arm RCT<br><b>Follow-up:</b> 6 months (180 days), primary outcome 3 months (90 days) | N: 171 eyes of 171 patients<br><b>Inclusion criteria:</b> $\geq 12$ years, DMO persisting for $\geq 90$ days after laser treatment or medical therapy, BCVA by ETDRS between 20/40 (67 letters) and 20/200 (35 letters) due to clinically detectable DMO; analysis includes only eyes with DMO associated with DR<br><b>Exclusion criteria:</b> history of vitrectomy in the study eye; use of systemic, periocular, or intraocular steroids within 30 days of enrollment; moderate or severe glaucoma in the study eye; poorly controlled hypertension (SP $> 160$ mmHg or DP $> 90$ mmHg); poorly controlled diabetes (HbA1c $> 13\%$ )<br><b>Age:</b> 62.9 to 63.8 years SD10.2 to 12.0<br><b>Sex:</b> 45.6 to 49.1% female<br><b>Diabetes type:</b> not reported<br><b>HbA1c:</b> 7.3 to 7.6%<br><b>Baseline VA:</b> letter score 54.4 to 54.7 SD9.96 to 11.88<br><b>Baseline CMT:</b> 417.5 to 446.5 $\mu\text{m}$ SD123.7 to 155.9<br><b>Comorbidities:</b> 19 to 21% prior cataract extraction | <b>Group 1 (DDS350, n=57 eyes):</b> 350 $\mu\text{g}$ dexamethasone IV drug delivery system, implanted into the vitreous cavity<br><b>Group 2 (DDS700, n=57 eyes):</b> 700 $\mu\text{g}$ dexamethasone IV drug delivery system, implanted into the vitreous cavity<br><b>Group 3 (C, n=57 eyes):</b> no treatment<br><b>Regimen for all groups:</b> eyes demonstrating a VA loss of $\geq 5$ letters could be treated with any other therapy (including laser photocoagulation and IV triamcinolone) (n=4 with photocoagulation or IV triamcinolone in the C group, n=2 in the DDS350 group, none in the DDS700 group) | <b>At 90 days BCVA (ETDRS):</b><br><table border="1"> <thead> <tr> <th></th> <th>plus <math>\geq 10</math> letters</th> <th>p</th> </tr> </thead> <tbody> <tr> <td><i>DDS350</i></td> <td>21% [graph]</td> <td>NS vs C</td> </tr> <tr> <td><i>DDS700</i></td> <td>33%</td> <td>0.007 vs C</td> </tr> <tr> <td><i>C</i></td> <td>12%</td> <td></td> </tr> </tbody> </table> <b>CMT (OCT):</b><br><table border="1"> <thead> <tr> <th></th> <th>CMT (<math>\mu\text{m}</math>)</th> <th>p</th> </tr> </thead> <tbody> <tr> <td><i>DDS350</i></td> <td>-42.57 SD95.96</td> <td>NS (<math>p=0.07</math>) vs C</td> </tr> <tr> <td><i>DDS700</i></td> <td>-132.27 SD160.86</td> <td><math>&lt; 0.001</math> vs C</td> </tr> <tr> <td><i>C</i></td> <td>+30.21 SD82.12</td> <td></td> </tr> </tbody> </table> <b>At 180 days BCVA (ETDRS):</b><br><table border="1"> <thead> <tr> <th></th> <th>plus <math>\geq 10</math> letters</th> <th>p</th> </tr> </thead> <tbody> <tr> <td><i>DDS350</i></td> <td>20% [graph]</td> <td>NS vs C</td> </tr> <tr> <td><i>DDS700</i></td> <td>33% [graph]</td> <td>NS vs C</td> </tr> <tr> <td><i>C</i></td> <td>23% [graph]</td> <td></td> </tr> </tbody> </table> |  | plus $\geq 10$ letters | p | <i>DDS350</i> | 21% [graph] | NS vs C | <i>DDS700</i> | 33% | 0.007 vs C | <i>C</i> | 12% |  |  | CMT ( $\mu\text{m}$ ) | p | <i>DDS350</i> | -42.57 SD95.96 | NS ( $p=0.07$ ) vs C | <i>DDS700</i> | -132.27 SD160.86 | $< 0.001$ vs C | <i>C</i> | +30.21 SD82.12 |  |  | plus $\geq 10$ letters | p | <i>DDS350</i> | 20% [graph] | NS vs C | <i>DDS700</i> | 33% [graph] | NS vs C | <i>C</i> | 23% [graph] |  |
|                                                                                                                                                            | plus $\geq 10$ letters                                                                                                                                                                                                                                                                                                                                                                                                                                                                                                                                                                                                                                                                                                                                                                                                                                                                                                                                                                                | p                                                                                                                                                                                                                                                                                                                                                                                                                                                                                                                                                                                                                      |                                                                                                                                                                                                                                                                                                                                                                                                                                                                                                                                                                                                                                                                                                                                                                                                                                                                                                                                                                                                                                                                                                                                                                                                  |  |                        |   |               |             |         |               |     |            |          |     |  |  |                       |   |               |                |                      |               |                  |                |          |                |  |  |                        |   |               |             |         |               |             |         |          |             |  |
| <i>DDS350</i>                                                                                                                                              | 21% [graph]                                                                                                                                                                                                                                                                                                                                                                                                                                                                                                                                                                                                                                                                                                                                                                                                                                                                                                                                                                                           | NS vs C                                                                                                                                                                                                                                                                                                                                                                                                                                                                                                                                                                                                                |                                                                                                                                                                                                                                                                                                                                                                                                                                                                                                                                                                                                                                                                                                                                                                                                                                                                                                                                                                                                                                                                                                                                                                                                  |  |                        |   |               |             |         |               |     |            |          |     |  |  |                       |   |               |                |                      |               |                  |                |          |                |  |  |                        |   |               |             |         |               |             |         |          |             |  |
| <i>DDS700</i>                                                                                                                                              | 33%                                                                                                                                                                                                                                                                                                                                                                                                                                                                                                                                                                                                                                                                                                                                                                                                                                                                                                                                                                                                   | 0.007 vs C                                                                                                                                                                                                                                                                                                                                                                                                                                                                                                                                                                                                             |                                                                                                                                                                                                                                                                                                                                                                                                                                                                                                                                                                                                                                                                                                                                                                                                                                                                                                                                                                                                                                                                                                                                                                                                  |  |                        |   |               |             |         |               |     |            |          |     |  |  |                       |   |               |                |                      |               |                  |                |          |                |  |  |                        |   |               |             |         |               |             |         |          |             |  |
| <i>C</i>                                                                                                                                                   | 12%                                                                                                                                                                                                                                                                                                                                                                                                                                                                                                                                                                                                                                                                                                                                                                                                                                                                                                                                                                                                   |                                                                                                                                                                                                                                                                                                                                                                                                                                                                                                                                                                                                                        |                                                                                                                                                                                                                                                                                                                                                                                                                                                                                                                                                                                                                                                                                                                                                                                                                                                                                                                                                                                                                                                                                                                                                                                                  |  |                        |   |               |             |         |               |     |            |          |     |  |  |                       |   |               |                |                      |               |                  |                |          |                |  |  |                        |   |               |             |         |               |             |         |          |             |  |
|                                                                                                                                                            | CMT ( $\mu\text{m}$ )                                                                                                                                                                                                                                                                                                                                                                                                                                                                                                                                                                                                                                                                                                                                                                                                                                                                                                                                                                                 | p                                                                                                                                                                                                                                                                                                                                                                                                                                                                                                                                                                                                                      |                                                                                                                                                                                                                                                                                                                                                                                                                                                                                                                                                                                                                                                                                                                                                                                                                                                                                                                                                                                                                                                                                                                                                                                                  |  |                        |   |               |             |         |               |     |            |          |     |  |  |                       |   |               |                |                      |               |                  |                |          |                |  |  |                        |   |               |             |         |               |             |         |          |             |  |
| <i>DDS350</i>                                                                                                                                              | -42.57 SD95.96                                                                                                                                                                                                                                                                                                                                                                                                                                                                                                                                                                                                                                                                                                                                                                                                                                                                                                                                                                                        | NS ( $p=0.07$ ) vs C                                                                                                                                                                                                                                                                                                                                                                                                                                                                                                                                                                                                   |                                                                                                                                                                                                                                                                                                                                                                                                                                                                                                                                                                                                                                                                                                                                                                                                                                                                                                                                                                                                                                                                                                                                                                                                  |  |                        |   |               |             |         |               |     |            |          |     |  |  |                       |   |               |                |                      |               |                  |                |          |                |  |  |                        |   |               |             |         |               |             |         |          |             |  |
| <i>DDS700</i>                                                                                                                                              | -132.27 SD160.86                                                                                                                                                                                                                                                                                                                                                                                                                                                                                                                                                                                                                                                                                                                                                                                                                                                                                                                                                                                      | $< 0.001$ vs C                                                                                                                                                                                                                                                                                                                                                                                                                                                                                                                                                                                                         |                                                                                                                                                                                                                                                                                                                                                                                                                                                                                                                                                                                                                                                                                                                                                                                                                                                                                                                                                                                                                                                                                                                                                                                                  |  |                        |   |               |             |         |               |     |            |          |     |  |  |                       |   |               |                |                      |               |                  |                |          |                |  |  |                        |   |               |             |         |               |             |         |          |             |  |
| <i>C</i>                                                                                                                                                   | +30.21 SD82.12                                                                                                                                                                                                                                                                                                                                                                                                                                                                                                                                                                                                                                                                                                                                                                                                                                                                                                                                                                                        |                                                                                                                                                                                                                                                                                                                                                                                                                                                                                                                                                                                                                        |                                                                                                                                                                                                                                                                                                                                                                                                                                                                                                                                                                                                                                                                                                                                                                                                                                                                                                                                                                                                                                                                                                                                                                                                  |  |                        |   |               |             |         |               |     |            |          |     |  |  |                       |   |               |                |                      |               |                  |                |          |                |  |  |                        |   |               |             |         |               |             |         |          |             |  |
|                                                                                                                                                            | plus $\geq 10$ letters                                                                                                                                                                                                                                                                                                                                                                                                                                                                                                                                                                                                                                                                                                                                                                                                                                                                                                                                                                                | p                                                                                                                                                                                                                                                                                                                                                                                                                                                                                                                                                                                                                      |                                                                                                                                                                                                                                                                                                                                                                                                                                                                                                                                                                                                                                                                                                                                                                                                                                                                                                                                                                                                                                                                                                                                                                                                  |  |                        |   |               |             |         |               |     |            |          |     |  |  |                       |   |               |                |                      |               |                  |                |          |                |  |  |                        |   |               |             |         |               |             |         |          |             |  |
| <i>DDS350</i>                                                                                                                                              | 20% [graph]                                                                                                                                                                                                                                                                                                                                                                                                                                                                                                                                                                                                                                                                                                                                                                                                                                                                                                                                                                                           | NS vs C                                                                                                                                                                                                                                                                                                                                                                                                                                                                                                                                                                                                                |                                                                                                                                                                                                                                                                                                                                                                                                                                                                                                                                                                                                                                                                                                                                                                                                                                                                                                                                                                                                                                                                                                                                                                                                  |  |                        |   |               |             |         |               |     |            |          |     |  |  |                       |   |               |                |                      |               |                  |                |          |                |  |  |                        |   |               |             |         |               |             |         |          |             |  |
| <i>DDS700</i>                                                                                                                                              | 33% [graph]                                                                                                                                                                                                                                                                                                                                                                                                                                                                                                                                                                                                                                                                                                                                                                                                                                                                                                                                                                                           | NS vs C                                                                                                                                                                                                                                                                                                                                                                                                                                                                                                                                                                                                                |                                                                                                                                                                                                                                                                                                                                                                                                                                                                                                                                                                                                                                                                                                                                                                                                                                                                                                                                                                                                                                                                                                                                                                                                  |  |                        |   |               |             |         |               |     |            |          |     |  |  |                       |   |               |                |                      |               |                  |                |          |                |  |  |                        |   |               |             |         |               |             |         |          |             |  |
| <i>C</i>                                                                                                                                                   | 23% [graph]                                                                                                                                                                                                                                                                                                                                                                                                                                                                                                                                                                                                                                                                                                                                                                                                                                                                                                                                                                                           |                                                                                                                                                                                                                                                                                                                                                                                                                                                                                                                                                                                                                        |                                                                                                                                                                                                                                                                                                                                                                                                                                                                                                                                                                                                                                                                                                                                                                                                                                                                                                                                                                                                                                                                                                                                                                                                  |  |                        |   |               |             |         |               |     |            |          |     |  |  |                       |   |               |                |                      |               |                  |                |          |                |  |  |                        |   |               |             |         |               |             |         |          |             |  |
| <i>Fluocinolone</i>                                                                                                                                        |                                                                                                                                                                                                                                                                                                                                                                                                                                                                                                                                                                                                                                                                                                                                                                                                                                                                                                                                                                                                       |                                                                                                                                                                                                                                                                                                                                                                                                                                                                                                                                                                                                                        |                                                                                                                                                                                                                                                                                                                                                                                                                                                                                                                                                                                                                                                                                                                                                                                                                                                                                                                                                                                                                                                                                                                                                                                                  |  |                        |   |               |             |         |               |     |            |          |     |  |  |                       |   |               |                |                      |               |                  |                |          |                |  |  |                        |   |               |             |         |               |             |         |          |             |  |

| Study                                                                                                                                                                                                                             | Participants and baseline values                                                                                                                                                                                                                                                                                                                                                                                                                                                                                                                                                                                                                                                                                                                                                                                                                                                                                                                                                        | Intervention                                                                                                                                                                                                                                                                                                                                                                                                                                                                                                                                                                                                                                                                                                                                                                                                                                                                                                                                                                                        | Outcome (change from baseline at study end)                                                                                                                                                                                                                                                                                                                                                                                                                                                                                                                                                                                                                                                                                                                                                                                                                                                                                                                                                                                                                                                                                                                                                                                                                                                                                                                                                                                                                                                                                                                                                                                                                                                                                |  |                        |   |                |      |           |                |      |            |             |      |    |                |     |                 |                |     |  |          |     |  |  |                       |   |                |        |            |                |        |                |          |        |  |                                          |  |  |                    |       |                 |          |       |  |
|-----------------------------------------------------------------------------------------------------------------------------------------------------------------------------------------------------------------------------------|-----------------------------------------------------------------------------------------------------------------------------------------------------------------------------------------------------------------------------------------------------------------------------------------------------------------------------------------------------------------------------------------------------------------------------------------------------------------------------------------------------------------------------------------------------------------------------------------------------------------------------------------------------------------------------------------------------------------------------------------------------------------------------------------------------------------------------------------------------------------------------------------------------------------------------------------------------------------------------------------|-----------------------------------------------------------------------------------------------------------------------------------------------------------------------------------------------------------------------------------------------------------------------------------------------------------------------------------------------------------------------------------------------------------------------------------------------------------------------------------------------------------------------------------------------------------------------------------------------------------------------------------------------------------------------------------------------------------------------------------------------------------------------------------------------------------------------------------------------------------------------------------------------------------------------------------------------------------------------------------------------------|----------------------------------------------------------------------------------------------------------------------------------------------------------------------------------------------------------------------------------------------------------------------------------------------------------------------------------------------------------------------------------------------------------------------------------------------------------------------------------------------------------------------------------------------------------------------------------------------------------------------------------------------------------------------------------------------------------------------------------------------------------------------------------------------------------------------------------------------------------------------------------------------------------------------------------------------------------------------------------------------------------------------------------------------------------------------------------------------------------------------------------------------------------------------------------------------------------------------------------------------------------------------------------------------------------------------------------------------------------------------------------------------------------------------------------------------------------------------------------------------------------------------------------------------------------------------------------------------------------------------------------------------------------------------------------------------------------------------------|--|------------------------|---|----------------|------|-----------|----------------|------|------------|-------------|------|----|----------------|-----|-----------------|----------------|-----|--|----------|-----|--|--|-----------------------|---|----------------|--------|------------|----------------|--------|----------------|----------|--------|--|------------------------------------------|--|--|--------------------|-------|-----------------|----------|-------|--|
| <p><b>FAME Study (Campochiaro 2011/ Campochiaro 2012)</b><br/>[29,60]</p> <p>Multicenter international</p> <p><b>Design:</b> 3-arm placebo-controlled RCT</p> <p><b>Follow-up:</b> 24 months; abstract with 36 month outcomes</p> | <p>N: 956 eyes of 956 patients</p> <p><b>Inclusion criteria:</b> DMO, CMT <math>\geq 250</math> <math>\mu\text{m}</math> despite at least 1 prior focal/grid macular laser photocoagulation treatment, BCVA ETDRS letter score between 19 and 68 (20/50 to 20/400)</p> <p><b>Exclusion criteria:</b> glaucoma, ocular hypertension, IOP <math>&gt; 21</math> mmHg, taking IOP lowering drops; laser treatment for DMO within 12 weeks of screening, any ocular surgery in the study eye within 12 weeks of screening; ocular or systemic steroid therapy; active ocular infection; pregnancy</p> <p><b>Age:</b> 62.5 SD9.4 years</p> <p><b>Sex:</b> 40.6%</p> <p><b>Diabetes type:</b> 6.6% type 1 DM, 92% type 2 DM, 1.4% uncertain</p> <p><b>HbA1c:</b> 7.8 SD1.59 %</p> <p><b>Baseline VA:</b> ETDRS letter score 53.4 SD12.23</p> <p><b>Baseline CMT:</b> 469.0 SD164.78 <math>\mu\text{m}</math></p> <p><b>Comorbidities:</b> 47.1% cataract at baseline, 62.7 to 67.4% phakic</p> | <p><b>Group 1 (SRFA0.2, n=375 eyes):</b> intravitreal insert releasing 0.2 <math>\mu\text{g/day}</math> fluocinolone acetonide (FA) (2, 3, or 4 treatments received by 21.3, 1.9 and 0.3%)</p> <p><b>Group 2 (SRFA0.5, n=393 eyes):</b> intravitreal insert releasing 0.5 <math>\mu\text{g/day}</math> fluocinolone acetonide (2, 3, or 4 treatments received by 22.6, 2.5 and 0.3%)</p> <p><b>Group 3 (C, n=185 eyes):</b> sham injection (2, 3, or 4 treatments received by 19.5, 2.7 and 1.6%)</p> <p><b>Regimen for all groups:</b> patients could receive rescue focal/grid laser therapy any time after the first 6 weeks for persistent oedema (35.2 to 36.7% in FA groups, 58.9% control group, <math>p &lt; 0.001</math>); treatments were allowed every 3 months for persistent or recurrent oedema; patients eligible for another FA insert at 1 year if <math>\geq 5</math> letter reduction in BCVA or <math>&gt; 50</math> <math>\mu\text{m}</math> CMT increase from best status</p> | <p><b>At 24 months</b></p> <p><b>BCVA (ETDRS):</b></p> <table border="1"> <thead> <tr> <th></th> <th>BCVA (letters)</th> <th>p</th> </tr> </thead> <tbody> <tr> <td><i>SRFA0.2</i></td> <td>+4.4</td> <td>0.02 vs C</td> </tr> <tr> <td><i>SRFA0.5</i></td> <td>+5.4</td> <td>0.017 vs C</td> </tr> <tr> <td><i>C</i></td> <td>+1.7</td> <td></td> </tr> </tbody> </table> <p><b>plus <math>\geq 15</math> letters</b></p> <table border="1"> <tbody> <tr> <td><i>SRFA0.2</i></td> <td>29%</td> <td>0.002 SRFA vs C</td> </tr> <tr> <td><i>SRFA0.5</i></td> <td>29%</td> <td></td> </tr> <tr> <td><i>C</i></td> <td>16%</td> <td></td> </tr> </tbody> </table> <p>Subgroups:</p> <ul style="list-style-type: none"> <li>BCVA benefits only in pseudophakic eyes (cataract surgery before or during the study), in phakic eyes, BCVA letter score was reduced by 5 (high dose) and 9 (low dose) from baseline at 24 months</li> </ul> <p><b>CMT (optical coherence tomography):</b></p> <table border="1"> <thead> <tr> <th></th> <th>CMT (<math>\mu\text{m}</math>)</th> <th>p</th> </tr> </thead> <tbody> <tr> <td><i>SRFA0.2</i></td> <td>-167.8</td> <td>0.005 vs C</td> </tr> <tr> <td><i>SRFA0.5</i></td> <td>-177.1</td> <td><math>&lt; 0.001</math> vs C</td> </tr> <tr> <td><i>C</i></td> <td>-111.3</td> <td></td> </tr> </tbody> </table> <ul style="list-style-type: none"> <li>effect maintained at 36 months</li> </ul> <p><b>At 36 months</b></p> <table border="1"> <tbody> <tr> <td colspan="3"><b>plus <math>\geq 15</math> letters</b></td> </tr> <tr> <td><i>SRFA0.2/0.5</i></td> <td>28.7%</td> <td>0.018 SRFA vs C</td> </tr> <tr> <td><i>C</i></td> <td>18.9%</td> <td></td> </tr> </tbody> </table> |  | BCVA (letters)         | p | <i>SRFA0.2</i> | +4.4 | 0.02 vs C | <i>SRFA0.5</i> | +5.4 | 0.017 vs C | <i>C</i>    | +1.7 |    | <i>SRFA0.2</i> | 29% | 0.002 SRFA vs C | <i>SRFA0.5</i> | 29% |  | <i>C</i> | 16% |  |  | CMT ( $\mu\text{m}$ ) | p | <i>SRFA0.2</i> | -167.8 | 0.005 vs C | <i>SRFA0.5</i> | -177.1 | $< 0.001$ vs C | <i>C</i> | -111.3 |  | <b>plus <math>\geq 15</math> letters</b> |  |  | <i>SRFA0.2/0.5</i> | 28.7% | 0.018 SRFA vs C | <i>C</i> | 18.9% |  |
|                                                                                                                                                                                                                                   | BCVA (letters)                                                                                                                                                                                                                                                                                                                                                                                                                                                                                                                                                                                                                                                                                                                                                                                                                                                                                                                                                                          | p                                                                                                                                                                                                                                                                                                                                                                                                                                                                                                                                                                                                                                                                                                                                                                                                                                                                                                                                                                                                   |                                                                                                                                                                                                                                                                                                                                                                                                                                                                                                                                                                                                                                                                                                                                                                                                                                                                                                                                                                                                                                                                                                                                                                                                                                                                                                                                                                                                                                                                                                                                                                                                                                                                                                                            |  |                        |   |                |      |           |                |      |            |             |      |    |                |     |                 |                |     |  |          |     |  |  |                       |   |                |        |            |                |        |                |          |        |  |                                          |  |  |                    |       |                 |          |       |  |
| <i>SRFA0.2</i>                                                                                                                                                                                                                    | +4.4                                                                                                                                                                                                                                                                                                                                                                                                                                                                                                                                                                                                                                                                                                                                                                                                                                                                                                                                                                                    | 0.02 vs C                                                                                                                                                                                                                                                                                                                                                                                                                                                                                                                                                                                                                                                                                                                                                                                                                                                                                                                                                                                           |                                                                                                                                                                                                                                                                                                                                                                                                                                                                                                                                                                                                                                                                                                                                                                                                                                                                                                                                                                                                                                                                                                                                                                                                                                                                                                                                                                                                                                                                                                                                                                                                                                                                                                                            |  |                        |   |                |      |           |                |      |            |             |      |    |                |     |                 |                |     |  |          |     |  |  |                       |   |                |        |            |                |        |                |          |        |  |                                          |  |  |                    |       |                 |          |       |  |
| <i>SRFA0.5</i>                                                                                                                                                                                                                    | +5.4                                                                                                                                                                                                                                                                                                                                                                                                                                                                                                                                                                                                                                                                                                                                                                                                                                                                                                                                                                                    | 0.017 vs C                                                                                                                                                                                                                                                                                                                                                                                                                                                                                                                                                                                                                                                                                                                                                                                                                                                                                                                                                                                          |                                                                                                                                                                                                                                                                                                                                                                                                                                                                                                                                                                                                                                                                                                                                                                                                                                                                                                                                                                                                                                                                                                                                                                                                                                                                                                                                                                                                                                                                                                                                                                                                                                                                                                                            |  |                        |   |                |      |           |                |      |            |             |      |    |                |     |                 |                |     |  |          |     |  |  |                       |   |                |        |            |                |        |                |          |        |  |                                          |  |  |                    |       |                 |          |       |  |
| <i>C</i>                                                                                                                                                                                                                          | +1.7                                                                                                                                                                                                                                                                                                                                                                                                                                                                                                                                                                                                                                                                                                                                                                                                                                                                                                                                                                                    |                                                                                                                                                                                                                                                                                                                                                                                                                                                                                                                                                                                                                                                                                                                                                                                                                                                                                                                                                                                                     |                                                                                                                                                                                                                                                                                                                                                                                                                                                                                                                                                                                                                                                                                                                                                                                                                                                                                                                                                                                                                                                                                                                                                                                                                                                                                                                                                                                                                                                                                                                                                                                                                                                                                                                            |  |                        |   |                |      |           |                |      |            |             |      |    |                |     |                 |                |     |  |          |     |  |  |                       |   |                |        |            |                |        |                |          |        |  |                                          |  |  |                    |       |                 |          |       |  |
| <i>SRFA0.2</i>                                                                                                                                                                                                                    | 29%                                                                                                                                                                                                                                                                                                                                                                                                                                                                                                                                                                                                                                                                                                                                                                                                                                                                                                                                                                                     | 0.002 SRFA vs C                                                                                                                                                                                                                                                                                                                                                                                                                                                                                                                                                                                                                                                                                                                                                                                                                                                                                                                                                                                     |                                                                                                                                                                                                                                                                                                                                                                                                                                                                                                                                                                                                                                                                                                                                                                                                                                                                                                                                                                                                                                                                                                                                                                                                                                                                                                                                                                                                                                                                                                                                                                                                                                                                                                                            |  |                        |   |                |      |           |                |      |            |             |      |    |                |     |                 |                |     |  |          |     |  |  |                       |   |                |        |            |                |        |                |          |        |  |                                          |  |  |                    |       |                 |          |       |  |
| <i>SRFA0.5</i>                                                                                                                                                                                                                    | 29%                                                                                                                                                                                                                                                                                                                                                                                                                                                                                                                                                                                                                                                                                                                                                                                                                                                                                                                                                                                     |                                                                                                                                                                                                                                                                                                                                                                                                                                                                                                                                                                                                                                                                                                                                                                                                                                                                                                                                                                                                     |                                                                                                                                                                                                                                                                                                                                                                                                                                                                                                                                                                                                                                                                                                                                                                                                                                                                                                                                                                                                                                                                                                                                                                                                                                                                                                                                                                                                                                                                                                                                                                                                                                                                                                                            |  |                        |   |                |      |           |                |      |            |             |      |    |                |     |                 |                |     |  |          |     |  |  |                       |   |                |        |            |                |        |                |          |        |  |                                          |  |  |                    |       |                 |          |       |  |
| <i>C</i>                                                                                                                                                                                                                          | 16%                                                                                                                                                                                                                                                                                                                                                                                                                                                                                                                                                                                                                                                                                                                                                                                                                                                                                                                                                                                     |                                                                                                                                                                                                                                                                                                                                                                                                                                                                                                                                                                                                                                                                                                                                                                                                                                                                                                                                                                                                     |                                                                                                                                                                                                                                                                                                                                                                                                                                                                                                                                                                                                                                                                                                                                                                                                                                                                                                                                                                                                                                                                                                                                                                                                                                                                                                                                                                                                                                                                                                                                                                                                                                                                                                                            |  |                        |   |                |      |           |                |      |            |             |      |    |                |     |                 |                |     |  |          |     |  |  |                       |   |                |        |            |                |        |                |          |        |  |                                          |  |  |                    |       |                 |          |       |  |
|                                                                                                                                                                                                                                   | CMT ( $\mu\text{m}$ )                                                                                                                                                                                                                                                                                                                                                                                                                                                                                                                                                                                                                                                                                                                                                                                                                                                                                                                                                                   | p                                                                                                                                                                                                                                                                                                                                                                                                                                                                                                                                                                                                                                                                                                                                                                                                                                                                                                                                                                                                   |                                                                                                                                                                                                                                                                                                                                                                                                                                                                                                                                                                                                                                                                                                                                                                                                                                                                                                                                                                                                                                                                                                                                                                                                                                                                                                                                                                                                                                                                                                                                                                                                                                                                                                                            |  |                        |   |                |      |           |                |      |            |             |      |    |                |     |                 |                |     |  |          |     |  |  |                       |   |                |        |            |                |        |                |          |        |  |                                          |  |  |                    |       |                 |          |       |  |
| <i>SRFA0.2</i>                                                                                                                                                                                                                    | -167.8                                                                                                                                                                                                                                                                                                                                                                                                                                                                                                                                                                                                                                                                                                                                                                                                                                                                                                                                                                                  | 0.005 vs C                                                                                                                                                                                                                                                                                                                                                                                                                                                                                                                                                                                                                                                                                                                                                                                                                                                                                                                                                                                          |                                                                                                                                                                                                                                                                                                                                                                                                                                                                                                                                                                                                                                                                                                                                                                                                                                                                                                                                                                                                                                                                                                                                                                                                                                                                                                                                                                                                                                                                                                                                                                                                                                                                                                                            |  |                        |   |                |      |           |                |      |            |             |      |    |                |     |                 |                |     |  |          |     |  |  |                       |   |                |        |            |                |        |                |          |        |  |                                          |  |  |                    |       |                 |          |       |  |
| <i>SRFA0.5</i>                                                                                                                                                                                                                    | -177.1                                                                                                                                                                                                                                                                                                                                                                                                                                                                                                                                                                                                                                                                                                                                                                                                                                                                                                                                                                                  | $< 0.001$ vs C                                                                                                                                                                                                                                                                                                                                                                                                                                                                                                                                                                                                                                                                                                                                                                                                                                                                                                                                                                                      |                                                                                                                                                                                                                                                                                                                                                                                                                                                                                                                                                                                                                                                                                                                                                                                                                                                                                                                                                                                                                                                                                                                                                                                                                                                                                                                                                                                                                                                                                                                                                                                                                                                                                                                            |  |                        |   |                |      |           |                |      |            |             |      |    |                |     |                 |                |     |  |          |     |  |  |                       |   |                |        |            |                |        |                |          |        |  |                                          |  |  |                    |       |                 |          |       |  |
| <i>C</i>                                                                                                                                                                                                                          | -111.3                                                                                                                                                                                                                                                                                                                                                                                                                                                                                                                                                                                                                                                                                                                                                                                                                                                                                                                                                                                  |                                                                                                                                                                                                                                                                                                                                                                                                                                                                                                                                                                                                                                                                                                                                                                                                                                                                                                                                                                                                     |                                                                                                                                                                                                                                                                                                                                                                                                                                                                                                                                                                                                                                                                                                                                                                                                                                                                                                                                                                                                                                                                                                                                                                                                                                                                                                                                                                                                                                                                                                                                                                                                                                                                                                                            |  |                        |   |                |      |           |                |      |            |             |      |    |                |     |                 |                |     |  |          |     |  |  |                       |   |                |        |            |                |        |                |          |        |  |                                          |  |  |                    |       |                 |          |       |  |
| <b>plus <math>\geq 15</math> letters</b>                                                                                                                                                                                          |                                                                                                                                                                                                                                                                                                                                                                                                                                                                                                                                                                                                                                                                                                                                                                                                                                                                                                                                                                                         |                                                                                                                                                                                                                                                                                                                                                                                                                                                                                                                                                                                                                                                                                                                                                                                                                                                                                                                                                                                                     |                                                                                                                                                                                                                                                                                                                                                                                                                                                                                                                                                                                                                                                                                                                                                                                                                                                                                                                                                                                                                                                                                                                                                                                                                                                                                                                                                                                                                                                                                                                                                                                                                                                                                                                            |  |                        |   |                |      |           |                |      |            |             |      |    |                |     |                 |                |     |  |          |     |  |  |                       |   |                |        |            |                |        |                |          |        |  |                                          |  |  |                    |       |                 |          |       |  |
| <i>SRFA0.2/0.5</i>                                                                                                                                                                                                                | 28.7%                                                                                                                                                                                                                                                                                                                                                                                                                                                                                                                                                                                                                                                                                                                                                                                                                                                                                                                                                                                   | 0.018 SRFA vs C                                                                                                                                                                                                                                                                                                                                                                                                                                                                                                                                                                                                                                                                                                                                                                                                                                                                                                                                                                                     |                                                                                                                                                                                                                                                                                                                                                                                                                                                                                                                                                                                                                                                                                                                                                                                                                                                                                                                                                                                                                                                                                                                                                                                                                                                                                                                                                                                                                                                                                                                                                                                                                                                                                                                            |  |                        |   |                |      |           |                |      |            |             |      |    |                |     |                 |                |     |  |          |     |  |  |                       |   |                |        |            |                |        |                |          |        |  |                                          |  |  |                    |       |                 |          |       |  |
| <i>C</i>                                                                                                                                                                                                                          | 18.9%                                                                                                                                                                                                                                                                                                                                                                                                                                                                                                                                                                                                                                                                                                                                                                                                                                                                                                                                                                                   |                                                                                                                                                                                                                                                                                                                                                                                                                                                                                                                                                                                                                                                                                                                                                                                                                                                                                                                                                                                                     |                                                                                                                                                                                                                                                                                                                                                                                                                                                                                                                                                                                                                                                                                                                                                                                                                                                                                                                                                                                                                                                                                                                                                                                                                                                                                                                                                                                                                                                                                                                                                                                                                                                                                                                            |  |                        |   |                |      |           |                |      |            |             |      |    |                |     |                 |                |     |  |          |     |  |  |                       |   |                |        |            |                |        |                |          |        |  |                                          |  |  |                    |       |                 |          |       |  |
| <p><b>Pearson 2011[43]</b><br/>USA<br/>Multicenter</p> <p><b>Design:</b> 2-arm RCT</p> <p><b>Follow-up:</b> 36 months</p>                                                                                                         | <p>N: 196 patients</p> <p><b>Inclusion criteria:</b> persistent or recurrent unilateral or bilateral DMO with retinal thickening involving fixation of <math>\geq 1</math> disc area in size, ETDRS visual acuity of <math>\geq 20</math> letters (20/400) to <math>\leq 68</math> letters (20/50) and <math>\geq 1</math> macular laser treatment in the study eye more than 12 weeks prior to enrollment</p> <p><b>Exclusion criteria:</b> Ocular surgery within 3 months prior to enrolment, uncontrolled IOP within the past 12 months while on <math>\geq 1</math> antiglaucoma medication, IOP of <math>\geq 22</math> mmHg at screening while on <math>\geq 1</math> antiglaucoma medication, peripheral retinal detachment in the area of implantation or media</p>                                                                                                                                                                                                             | <p><b>Group 1 (SRFA, n= 127):</b> 0.5 mg sustained release fluocinolone acetonide intravitreal implant</p> <p><b>Group 2 (SOC, n= 69):</b> standard of care – either repeat laser or observation</p> <p><b>Laser ETDRS protocol</b></p>                                                                                                                                                                                                                                                                                                                                                                                                                                                                                                                                                                                                                                                                                                                                                             | <p><b>At 3 years</b></p> <p><b>BCVA:</b></p> <table border="1"> <thead> <tr> <th></th> <th>gain <math>\geq 15</math> letters</th> <th>p</th> </tr> </thead> <tbody> <tr> <td><i>SRFA</i></td> <td>31%</td> <td>NS</td> </tr> <tr> <td><i>SOC</i></td> <td>20%</td> <td></td> </tr> </tbody> </table> <p><b>loss <math>\geq 15</math> letters</b></p> <table border="1"> <tbody> <tr> <td><i>SRFA</i></td> <td>17%</td> <td>NS</td> </tr> <tr> <td><i>SOC</i></td> <td>14%</td> <td></td> </tr> </tbody> </table> <p><b>CMT:</b></p>                                                                                                                                                                                                                                                                                                                                                                                                                                                                                                                                                                                                                                                                                                                                                                                                                                                                                                                                                                                                                                                                                                                                                                                        |  | gain $\geq 15$ letters | p | <i>SRFA</i>    | 31%  | NS        | <i>SOC</i>     | 20%  |            | <i>SRFA</i> | 17%  | NS | <i>SOC</i>     | 14% |                 |                |     |  |          |     |  |  |                       |   |                |        |            |                |        |                |          |        |  |                                          |  |  |                    |       |                 |          |       |  |
|                                                                                                                                                                                                                                   | gain $\geq 15$ letters                                                                                                                                                                                                                                                                                                                                                                                                                                                                                                                                                                                                                                                                                                                                                                                                                                                                                                                                                                  | p                                                                                                                                                                                                                                                                                                                                                                                                                                                                                                                                                                                                                                                                                                                                                                                                                                                                                                                                                                                                   |                                                                                                                                                                                                                                                                                                                                                                                                                                                                                                                                                                                                                                                                                                                                                                                                                                                                                                                                                                                                                                                                                                                                                                                                                                                                                                                                                                                                                                                                                                                                                                                                                                                                                                                            |  |                        |   |                |      |           |                |      |            |             |      |    |                |     |                 |                |     |  |          |     |  |  |                       |   |                |        |            |                |        |                |          |        |  |                                          |  |  |                    |       |                 |          |       |  |
| <i>SRFA</i>                                                                                                                                                                                                                       | 31%                                                                                                                                                                                                                                                                                                                                                                                                                                                                                                                                                                                                                                                                                                                                                                                                                                                                                                                                                                                     | NS                                                                                                                                                                                                                                                                                                                                                                                                                                                                                                                                                                                                                                                                                                                                                                                                                                                                                                                                                                                                  |                                                                                                                                                                                                                                                                                                                                                                                                                                                                                                                                                                                                                                                                                                                                                                                                                                                                                                                                                                                                                                                                                                                                                                                                                                                                                                                                                                                                                                                                                                                                                                                                                                                                                                                            |  |                        |   |                |      |           |                |      |            |             |      |    |                |     |                 |                |     |  |          |     |  |  |                       |   |                |        |            |                |        |                |          |        |  |                                          |  |  |                    |       |                 |          |       |  |
| <i>SOC</i>                                                                                                                                                                                                                        | 20%                                                                                                                                                                                                                                                                                                                                                                                                                                                                                                                                                                                                                                                                                                                                                                                                                                                                                                                                                                                     |                                                                                                                                                                                                                                                                                                                                                                                                                                                                                                                                                                                                                                                                                                                                                                                                                                                                                                                                                                                                     |                                                                                                                                                                                                                                                                                                                                                                                                                                                                                                                                                                                                                                                                                                                                                                                                                                                                                                                                                                                                                                                                                                                                                                                                                                                                                                                                                                                                                                                                                                                                                                                                                                                                                                                            |  |                        |   |                |      |           |                |      |            |             |      |    |                |     |                 |                |     |  |          |     |  |  |                       |   |                |        |            |                |        |                |          |        |  |                                          |  |  |                    |       |                 |          |       |  |
| <i>SRFA</i>                                                                                                                                                                                                                       | 17%                                                                                                                                                                                                                                                                                                                                                                                                                                                                                                                                                                                                                                                                                                                                                                                                                                                                                                                                                                                     | NS                                                                                                                                                                                                                                                                                                                                                                                                                                                                                                                                                                                                                                                                                                                                                                                                                                                                                                                                                                                                  |                                                                                                                                                                                                                                                                                                                                                                                                                                                                                                                                                                                                                                                                                                                                                                                                                                                                                                                                                                                                                                                                                                                                                                                                                                                                                                                                                                                                                                                                                                                                                                                                                                                                                                                            |  |                        |   |                |      |           |                |      |            |             |      |    |                |     |                 |                |     |  |          |     |  |  |                       |   |                |        |            |                |        |                |          |        |  |                                          |  |  |                    |       |                 |          |       |  |
| <i>SOC</i>                                                                                                                                                                                                                        | 14%                                                                                                                                                                                                                                                                                                                                                                                                                                                                                                                                                                                                                                                                                                                                                                                                                                                                                                                                                                                     |                                                                                                                                                                                                                                                                                                                                                                                                                                                                                                                                                                                                                                                                                                                                                                                                                                                                                                                                                                                                     |                                                                                                                                                                                                                                                                                                                                                                                                                                                                                                                                                                                                                                                                                                                                                                                                                                                                                                                                                                                                                                                                                                                                                                                                                                                                                                                                                                                                                                                                                                                                                                                                                                                                                                                            |  |                        |   |                |      |           |                |      |            |             |      |    |                |     |                 |                |     |  |          |     |  |  |                       |   |                |        |            |                |        |                |          |        |  |                                          |  |  |                    |       |                 |          |       |  |

1  
2  
3  
4  
5  
6  
7  
8  
9  
10  
11  
12  
13  
14  
15  
16  
17  
18  
19  
20  
21  
22  
23  
24  
25  
26  
27  
28  
29  
30  
31  
32  
33  
34  
35  
36  
37  
38  
39  
40  
41  
42  
43  
44  
45  
46  
47  
48  
49

| Study | Participants and baseline values                                                                                                                                                                                                                               | Intervention | Outcome (change from baseline at study end) |    |
|-------|----------------------------------------------------------------------------------------------------------------------------------------------------------------------------------------------------------------------------------------------------------------|--------------|---------------------------------------------|----|
|       | opacity precluding diagnosis of status in the study eye<br>Age: 61.4-62.7 years<br>Sex: 41.7-42% female<br>Diabetes type: 62.3-70% on insulin<br>HbA1c: not reported<br>Baseline VA: not reported<br>Baseline CMT: not reported<br>Comorbidities: not reported |              | Mean change in<br>baseline CMT              | p  |
|       |                                                                                                                                                                                                                                                                |              | <i>SRFA</i> -86                             | NS |
|       |                                                                                                                                                                                                                                                                |              | <i>SOC</i> -110                             |    |

Abbreviations: See table 2

Table 67: Triamcinolone studies

| Study                                                                                                                                                                                                          | Participants and baseline values                                                                                                                                                                                                                                                                                                                                                                                                                                                                                                                                                                                                                                                                                                                                                                                                                                                                                                                                                                                                                                                                                                                                                                                                                                      | Intervention                                                                                                                                                                                                                                                                                                                                                                                                                                                                                                                                                                                                                                                                                                                                                                                                                                                                                                                                                                                                                                                                                                                                                                                                                                                | Outcome (change from baseline at study end)                                                                                                                                                                                                                                                                                                                                                                                                                                                                                                                                                                                                                                                                                                                                                                                                                                                                                                                                                                                                                                                                                                                                                                                                                                                                                                                                                                                                                                                                                                                                                                                                                                                                                                                                                                                                                                                                                                                                                                                                |  |                |   |             |         |           |             |         |            |          |         |  |  |                      |   |             |                                                       |                       |             |                                                       |           |          |                                                       |  |  |                       |   |             |           |                           |             |           |               |          |            |  |  |       |       |   |             |     |     |  |             |     |     |              |
|----------------------------------------------------------------------------------------------------------------------------------------------------------------------------------------------------------------|-----------------------------------------------------------------------------------------------------------------------------------------------------------------------------------------------------------------------------------------------------------------------------------------------------------------------------------------------------------------------------------------------------------------------------------------------------------------------------------------------------------------------------------------------------------------------------------------------------------------------------------------------------------------------------------------------------------------------------------------------------------------------------------------------------------------------------------------------------------------------------------------------------------------------------------------------------------------------------------------------------------------------------------------------------------------------------------------------------------------------------------------------------------------------------------------------------------------------------------------------------------------------|-------------------------------------------------------------------------------------------------------------------------------------------------------------------------------------------------------------------------------------------------------------------------------------------------------------------------------------------------------------------------------------------------------------------------------------------------------------------------------------------------------------------------------------------------------------------------------------------------------------------------------------------------------------------------------------------------------------------------------------------------------------------------------------------------------------------------------------------------------------------------------------------------------------------------------------------------------------------------------------------------------------------------------------------------------------------------------------------------------------------------------------------------------------------------------------------------------------------------------------------------------------|--------------------------------------------------------------------------------------------------------------------------------------------------------------------------------------------------------------------------------------------------------------------------------------------------------------------------------------------------------------------------------------------------------------------------------------------------------------------------------------------------------------------------------------------------------------------------------------------------------------------------------------------------------------------------------------------------------------------------------------------------------------------------------------------------------------------------------------------------------------------------------------------------------------------------------------------------------------------------------------------------------------------------------------------------------------------------------------------------------------------------------------------------------------------------------------------------------------------------------------------------------------------------------------------------------------------------------------------------------------------------------------------------------------------------------------------------------------------------------------------------------------------------------------------------------------------------------------------------------------------------------------------------------------------------------------------------------------------------------------------------------------------------------------------------------------------------------------------------------------------------------------------------------------------------------------------------------------------------------------------------------------------------------------------|--|----------------|---|-------------|---------|-----------|-------------|---------|------------|----------|---------|--|--|----------------------|---|-------------|-------------------------------------------------------|-----------------------|-------------|-------------------------------------------------------|-----------|----------|-------------------------------------------------------|--|--|-----------------------|---|-------------|-----------|---------------------------|-------------|-----------|---------------|----------|------------|--|--|-------|-------|---|-------------|-----|-----|--|-------------|-----|-----|--------------|
| <p><b>DRCR Network 2008 (Ip 2008a / 2008b / Beck 2009 / Bressler 2009)</b>[22,61,63,64]<br/>USA<br/>Multicenter</p> <p><b>Design:</b> 3-arm RCT<br/><b>Follow-up:</b> 2 years, additional 3 year follow-up</p> | <p><b>N:</b> 840 eyes of 693 patients<br/><b>Inclusion criteria:</b> &gt;18 years, type 1 or 2 DM, study eye: (1) BCVA (E-ETDRS) between 24 and 73 (20/320 and 20/40), (2) retinal thickening due to DMO involving the center of the macula main cause for visual loss, (3) CMT <math>\geq 250</math> <math>\mu\text{m}</math>, (4) no expectation of scatter photocoagulation within 4 months<br/><b>Exclusion criteria:</b> any prior treatment with IV corticosteroids, peribulbar steroid injection within prior 6 months, photocoagulation for DMO within prior 15 weeks, panretinal scatter photocoagulation within prior 4 months, pars plana vitrectomy, history of open-angle glaucoma or steroid-induced IOP elevation requiring IOP-lowering treatment, and IOP <math>\geq 25</math> mmHg<br/><b>Age:</b> 63 SD9 years<br/><b>Sex:</b> 49% female<br/><b>Diabetes type:</b> 95% type 2 DM, 5% type 1 DM<br/><b>HbA1c:</b> 7.9 SD1.8%<br/><b>Baseline VA:</b> ETDRS letter score 59 SD11 (~20/63)<br/><b>Baseline CMT:</b> 24 SD130 <math>\mu\text{m}</math><br/><b>Comorbidities:</b> 21% pseudophakic, 2% ocular hypertension, 7% mild NPDR, 13% moderate NPDR, 40% moderately severe NPDR, 11% severe NPDR, 23.5% mild to moderate, 3% high risk PDR</p> | <p><b>Group 1 (IVT1, n=256 eyes):</b><br/>1 mg IV triamcinolone (3.5 treatments)<br/><b>Group 2 (IVT4, n=254 eyes):</b><br/>4 mg IV triamcinolone (3.1 treatments)<br/><b>Group 3 (L, n=330 eyes):</b><br/>focal/grid photocoagulation (2.9 treatments)<br/><b>Regimen for all groups:</b><br/>retreatment protocol: where indicated, retreatment was performed within 4 weeks after the follow-up visit and no sooner than 3.5 months from the time of last treatment; eyes were generally retreated unless:<br/>(1) little or no oedema involving the center of the macula present and CMT <math>\leq 225</math> <math>\mu\text{m}</math>, (2) VA letter score <math>\geq 79</math> (20/25 or better), (3) substantial improvement in macular oedema since last treatment (e.g., <math>\geq 50\%</math> decrease in CMT), (4) clinically significant adverse effect from prior treatment, (5) additional treatment deemed futile (<math>&lt;5</math> letter improvement in VA letter score or lack of CMT reduction), and (6) for laser group, complete focal/grid photocoagulation already given, with no areas identified for which additional treatment was indicated<br/><b>Laser Modified ETDRS protocol</b> as used in prior DRCR.net protocols</p> | <p><b>At 2 years</b><br/><b>BCVA (E-ETDRS):</b></p> <table border="1"> <thead> <tr> <th></th> <th>BCVA (letters)</th> <th>p</th> </tr> </thead> <tbody> <tr> <td><i>IVT1</i></td> <td>-2 SD18</td> <td>0.02 vs L</td> </tr> <tr> <td><i>IVT4</i></td> <td>-3 SD22</td> <td>0.002 vs L</td> </tr> <tr> <td><i>L</i></td> <td>+1 SD17</td> <td></td> </tr> </tbody> </table> <p><b>BCVA gain categories</b></p> <table border="1"> <thead> <tr> <th></th> <th>BCVA gain categories</th> <th>p</th> </tr> </thead> <tbody> <tr> <td><i>IVT1</i></td> <td>+10 or more: 25%<br/>+9 to -9: 50%<br/>-10 or more: 26%</td> <td>0.03 vs L, NS vs IVT4</td> </tr> <tr> <td><i>IVT4</i></td> <td>+10 or more: 28%<br/>+9 to -9: 44%<br/>-10 or more: 28%</td> <td>0.01 vs L</td> </tr> <tr> <td><i>L</i></td> <td>+10 or more: 31%<br/>+9 to -9: 50%<br/>-10 or more: 19%</td> <td></td> </tr> </tbody> </table> <p>Subgroups:</p> <ul style="list-style-type: none"> <li>• similar results when considering only pseudophakic eyes or eyes with minimal cataract</li> <li>• no substantially different results based on baseline VA, baseline CMT, history of focal/grid photocoagulation for DMO</li> <li>• 3 year results consistent with 2 year results for BCVA and CMT</li> </ul> <p><b>CMT (OCT):</b></p> <table border="1"> <thead> <tr> <th></th> <th>CMT (<math>\mu\text{m}</math>)</th> <th>p</th> </tr> </thead> <tbody> <tr> <td><i>IVT1</i></td> <td>-86 SD167</td> <td><math>&lt;0.001</math> vs L, NS vs IVT4</td> </tr> <tr> <td><i>IVT4</i></td> <td>-77 SD160</td> <td><math>&lt;0.001</math> vs L</td> </tr> <tr> <td><i>L</i></td> <td>-139 SD148</td> <td></td> </tr> </tbody> </table> <p><b>Progression of retinopathy:</b></p> <table border="1"> <thead> <tr> <th></th> <th>2 yrs</th> <th>3 yrs</th> <th>p</th> </tr> </thead> <tbody> <tr> <td><i>IVT1</i></td> <td>29%</td> <td>35%</td> <td></td> </tr> <tr> <td><i>IVT4</i></td> <td>21%</td> <td>30%</td> <td><math>&lt;0.05</math> vs L</td> </tr> </tbody> </table> |  | BCVA (letters) | p | <i>IVT1</i> | -2 SD18 | 0.02 vs L | <i>IVT4</i> | -3 SD22 | 0.002 vs L | <i>L</i> | +1 SD17 |  |  | BCVA gain categories | p | <i>IVT1</i> | +10 or more: 25%<br>+9 to -9: 50%<br>-10 or more: 26% | 0.03 vs L, NS vs IVT4 | <i>IVT4</i> | +10 or more: 28%<br>+9 to -9: 44%<br>-10 or more: 28% | 0.01 vs L | <i>L</i> | +10 or more: 31%<br>+9 to -9: 50%<br>-10 or more: 19% |  |  | CMT ( $\mu\text{m}$ ) | p | <i>IVT1</i> | -86 SD167 | $<0.001$ vs L, NS vs IVT4 | <i>IVT4</i> | -77 SD160 | $<0.001$ vs L | <i>L</i> | -139 SD148 |  |  | 2 yrs | 3 yrs | p | <i>IVT1</i> | 29% | 35% |  | <i>IVT4</i> | 21% | 30% | $<0.05$ vs L |
|                                                                                                                                                                                                                | BCVA (letters)                                                                                                                                                                                                                                                                                                                                                                                                                                                                                                                                                                                                                                                                                                                                                                                                                                                                                                                                                                                                                                                                                                                                                                                                                                                        | p                                                                                                                                                                                                                                                                                                                                                                                                                                                                                                                                                                                                                                                                                                                                                                                                                                                                                                                                                                                                                                                                                                                                                                                                                                                           |                                                                                                                                                                                                                                                                                                                                                                                                                                                                                                                                                                                                                                                                                                                                                                                                                                                                                                                                                                                                                                                                                                                                                                                                                                                                                                                                                                                                                                                                                                                                                                                                                                                                                                                                                                                                                                                                                                                                                                                                                                            |  |                |   |             |         |           |             |         |            |          |         |  |  |                      |   |             |                                                       |                       |             |                                                       |           |          |                                                       |  |  |                       |   |             |           |                           |             |           |               |          |            |  |  |       |       |   |             |     |     |  |             |     |     |              |
| <i>IVT1</i>                                                                                                                                                                                                    | -2 SD18                                                                                                                                                                                                                                                                                                                                                                                                                                                                                                                                                                                                                                                                                                                                                                                                                                                                                                                                                                                                                                                                                                                                                                                                                                                               | 0.02 vs L                                                                                                                                                                                                                                                                                                                                                                                                                                                                                                                                                                                                                                                                                                                                                                                                                                                                                                                                                                                                                                                                                                                                                                                                                                                   |                                                                                                                                                                                                                                                                                                                                                                                                                                                                                                                                                                                                                                                                                                                                                                                                                                                                                                                                                                                                                                                                                                                                                                                                                                                                                                                                                                                                                                                                                                                                                                                                                                                                                                                                                                                                                                                                                                                                                                                                                                            |  |                |   |             |         |           |             |         |            |          |         |  |  |                      |   |             |                                                       |                       |             |                                                       |           |          |                                                       |  |  |                       |   |             |           |                           |             |           |               |          |            |  |  |       |       |   |             |     |     |  |             |     |     |              |
| <i>IVT4</i>                                                                                                                                                                                                    | -3 SD22                                                                                                                                                                                                                                                                                                                                                                                                                                                                                                                                                                                                                                                                                                                                                                                                                                                                                                                                                                                                                                                                                                                                                                                                                                                               | 0.002 vs L                                                                                                                                                                                                                                                                                                                                                                                                                                                                                                                                                                                                                                                                                                                                                                                                                                                                                                                                                                                                                                                                                                                                                                                                                                                  |                                                                                                                                                                                                                                                                                                                                                                                                                                                                                                                                                                                                                                                                                                                                                                                                                                                                                                                                                                                                                                                                                                                                                                                                                                                                                                                                                                                                                                                                                                                                                                                                                                                                                                                                                                                                                                                                                                                                                                                                                                            |  |                |   |             |         |           |             |         |            |          |         |  |  |                      |   |             |                                                       |                       |             |                                                       |           |          |                                                       |  |  |                       |   |             |           |                           |             |           |               |          |            |  |  |       |       |   |             |     |     |  |             |     |     |              |
| <i>L</i>                                                                                                                                                                                                       | +1 SD17                                                                                                                                                                                                                                                                                                                                                                                                                                                                                                                                                                                                                                                                                                                                                                                                                                                                                                                                                                                                                                                                                                                                                                                                                                                               |                                                                                                                                                                                                                                                                                                                                                                                                                                                                                                                                                                                                                                                                                                                                                                                                                                                                                                                                                                                                                                                                                                                                                                                                                                                             |                                                                                                                                                                                                                                                                                                                                                                                                                                                                                                                                                                                                                                                                                                                                                                                                                                                                                                                                                                                                                                                                                                                                                                                                                                                                                                                                                                                                                                                                                                                                                                                                                                                                                                                                                                                                                                                                                                                                                                                                                                            |  |                |   |             |         |           |             |         |            |          |         |  |  |                      |   |             |                                                       |                       |             |                                                       |           |          |                                                       |  |  |                       |   |             |           |                           |             |           |               |          |            |  |  |       |       |   |             |     |     |  |             |     |     |              |
|                                                                                                                                                                                                                | BCVA gain categories                                                                                                                                                                                                                                                                                                                                                                                                                                                                                                                                                                                                                                                                                                                                                                                                                                                                                                                                                                                                                                                                                                                                                                                                                                                  | p                                                                                                                                                                                                                                                                                                                                                                                                                                                                                                                                                                                                                                                                                                                                                                                                                                                                                                                                                                                                                                                                                                                                                                                                                                                           |                                                                                                                                                                                                                                                                                                                                                                                                                                                                                                                                                                                                                                                                                                                                                                                                                                                                                                                                                                                                                                                                                                                                                                                                                                                                                                                                                                                                                                                                                                                                                                                                                                                                                                                                                                                                                                                                                                                                                                                                                                            |  |                |   |             |         |           |             |         |            |          |         |  |  |                      |   |             |                                                       |                       |             |                                                       |           |          |                                                       |  |  |                       |   |             |           |                           |             |           |               |          |            |  |  |       |       |   |             |     |     |  |             |     |     |              |
| <i>IVT1</i>                                                                                                                                                                                                    | +10 or more: 25%<br>+9 to -9: 50%<br>-10 or more: 26%                                                                                                                                                                                                                                                                                                                                                                                                                                                                                                                                                                                                                                                                                                                                                                                                                                                                                                                                                                                                                                                                                                                                                                                                                 | 0.03 vs L, NS vs IVT4                                                                                                                                                                                                                                                                                                                                                                                                                                                                                                                                                                                                                                                                                                                                                                                                                                                                                                                                                                                                                                                                                                                                                                                                                                       |                                                                                                                                                                                                                                                                                                                                                                                                                                                                                                                                                                                                                                                                                                                                                                                                                                                                                                                                                                                                                                                                                                                                                                                                                                                                                                                                                                                                                                                                                                                                                                                                                                                                                                                                                                                                                                                                                                                                                                                                                                            |  |                |   |             |         |           |             |         |            |          |         |  |  |                      |   |             |                                                       |                       |             |                                                       |           |          |                                                       |  |  |                       |   |             |           |                           |             |           |               |          |            |  |  |       |       |   |             |     |     |  |             |     |     |              |
| <i>IVT4</i>                                                                                                                                                                                                    | +10 or more: 28%<br>+9 to -9: 44%<br>-10 or more: 28%                                                                                                                                                                                                                                                                                                                                                                                                                                                                                                                                                                                                                                                                                                                                                                                                                                                                                                                                                                                                                                                                                                                                                                                                                 | 0.01 vs L                                                                                                                                                                                                                                                                                                                                                                                                                                                                                                                                                                                                                                                                                                                                                                                                                                                                                                                                                                                                                                                                                                                                                                                                                                                   |                                                                                                                                                                                                                                                                                                                                                                                                                                                                                                                                                                                                                                                                                                                                                                                                                                                                                                                                                                                                                                                                                                                                                                                                                                                                                                                                                                                                                                                                                                                                                                                                                                                                                                                                                                                                                                                                                                                                                                                                                                            |  |                |   |             |         |           |             |         |            |          |         |  |  |                      |   |             |                                                       |                       |             |                                                       |           |          |                                                       |  |  |                       |   |             |           |                           |             |           |               |          |            |  |  |       |       |   |             |     |     |  |             |     |     |              |
| <i>L</i>                                                                                                                                                                                                       | +10 or more: 31%<br>+9 to -9: 50%<br>-10 or more: 19%                                                                                                                                                                                                                                                                                                                                                                                                                                                                                                                                                                                                                                                                                                                                                                                                                                                                                                                                                                                                                                                                                                                                                                                                                 |                                                                                                                                                                                                                                                                                                                                                                                                                                                                                                                                                                                                                                                                                                                                                                                                                                                                                                                                                                                                                                                                                                                                                                                                                                                             |                                                                                                                                                                                                                                                                                                                                                                                                                                                                                                                                                                                                                                                                                                                                                                                                                                                                                                                                                                                                                                                                                                                                                                                                                                                                                                                                                                                                                                                                                                                                                                                                                                                                                                                                                                                                                                                                                                                                                                                                                                            |  |                |   |             |         |           |             |         |            |          |         |  |  |                      |   |             |                                                       |                       |             |                                                       |           |          |                                                       |  |  |                       |   |             |           |                           |             |           |               |          |            |  |  |       |       |   |             |     |     |  |             |     |     |              |
|                                                                                                                                                                                                                | CMT ( $\mu\text{m}$ )                                                                                                                                                                                                                                                                                                                                                                                                                                                                                                                                                                                                                                                                                                                                                                                                                                                                                                                                                                                                                                                                                                                                                                                                                                                 | p                                                                                                                                                                                                                                                                                                                                                                                                                                                                                                                                                                                                                                                                                                                                                                                                                                                                                                                                                                                                                                                                                                                                                                                                                                                           |                                                                                                                                                                                                                                                                                                                                                                                                                                                                                                                                                                                                                                                                                                                                                                                                                                                                                                                                                                                                                                                                                                                                                                                                                                                                                                                                                                                                                                                                                                                                                                                                                                                                                                                                                                                                                                                                                                                                                                                                                                            |  |                |   |             |         |           |             |         |            |          |         |  |  |                      |   |             |                                                       |                       |             |                                                       |           |          |                                                       |  |  |                       |   |             |           |                           |             |           |               |          |            |  |  |       |       |   |             |     |     |  |             |     |     |              |
| <i>IVT1</i>                                                                                                                                                                                                    | -86 SD167                                                                                                                                                                                                                                                                                                                                                                                                                                                                                                                                                                                                                                                                                                                                                                                                                                                                                                                                                                                                                                                                                                                                                                                                                                                             | $<0.001$ vs L, NS vs IVT4                                                                                                                                                                                                                                                                                                                                                                                                                                                                                                                                                                                                                                                                                                                                                                                                                                                                                                                                                                                                                                                                                                                                                                                                                                   |                                                                                                                                                                                                                                                                                                                                                                                                                                                                                                                                                                                                                                                                                                                                                                                                                                                                                                                                                                                                                                                                                                                                                                                                                                                                                                                                                                                                                                                                                                                                                                                                                                                                                                                                                                                                                                                                                                                                                                                                                                            |  |                |   |             |         |           |             |         |            |          |         |  |  |                      |   |             |                                                       |                       |             |                                                       |           |          |                                                       |  |  |                       |   |             |           |                           |             |           |               |          |            |  |  |       |       |   |             |     |     |  |             |     |     |              |
| <i>IVT4</i>                                                                                                                                                                                                    | -77 SD160                                                                                                                                                                                                                                                                                                                                                                                                                                                                                                                                                                                                                                                                                                                                                                                                                                                                                                                                                                                                                                                                                                                                                                                                                                                             | $<0.001$ vs L                                                                                                                                                                                                                                                                                                                                                                                                                                                                                                                                                                                                                                                                                                                                                                                                                                                                                                                                                                                                                                                                                                                                                                                                                                               |                                                                                                                                                                                                                                                                                                                                                                                                                                                                                                                                                                                                                                                                                                                                                                                                                                                                                                                                                                                                                                                                                                                                                                                                                                                                                                                                                                                                                                                                                                                                                                                                                                                                                                                                                                                                                                                                                                                                                                                                                                            |  |                |   |             |         |           |             |         |            |          |         |  |  |                      |   |             |                                                       |                       |             |                                                       |           |          |                                                       |  |  |                       |   |             |           |                           |             |           |               |          |            |  |  |       |       |   |             |     |     |  |             |     |     |              |
| <i>L</i>                                                                                                                                                                                                       | -139 SD148                                                                                                                                                                                                                                                                                                                                                                                                                                                                                                                                                                                                                                                                                                                                                                                                                                                                                                                                                                                                                                                                                                                                                                                                                                                            |                                                                                                                                                                                                                                                                                                                                                                                                                                                                                                                                                                                                                                                                                                                                                                                                                                                                                                                                                                                                                                                                                                                                                                                                                                                             |                                                                                                                                                                                                                                                                                                                                                                                                                                                                                                                                                                                                                                                                                                                                                                                                                                                                                                                                                                                                                                                                                                                                                                                                                                                                                                                                                                                                                                                                                                                                                                                                                                                                                                                                                                                                                                                                                                                                                                                                                                            |  |                |   |             |         |           |             |         |            |          |         |  |  |                      |   |             |                                                       |                       |             |                                                       |           |          |                                                       |  |  |                       |   |             |           |                           |             |           |               |          |            |  |  |       |       |   |             |     |     |  |             |     |     |              |
|                                                                                                                                                                                                                | 2 yrs                                                                                                                                                                                                                                                                                                                                                                                                                                                                                                                                                                                                                                                                                                                                                                                                                                                                                                                                                                                                                                                                                                                                                                                                                                                                 | 3 yrs                                                                                                                                                                                                                                                                                                                                                                                                                                                                                                                                                                                                                                                                                                                                                                                                                                                                                                                                                                                                                                                                                                                                                                                                                                                       | p                                                                                                                                                                                                                                                                                                                                                                                                                                                                                                                                                                                                                                                                                                                                                                                                                                                                                                                                                                                                                                                                                                                                                                                                                                                                                                                                                                                                                                                                                                                                                                                                                                                                                                                                                                                                                                                                                                                                                                                                                                          |  |                |   |             |         |           |             |         |            |          |         |  |  |                      |   |             |                                                       |                       |             |                                                       |           |          |                                                       |  |  |                       |   |             |           |                           |             |           |               |          |            |  |  |       |       |   |             |     |     |  |             |     |     |              |
| <i>IVT1</i>                                                                                                                                                                                                    | 29%                                                                                                                                                                                                                                                                                                                                                                                                                                                                                                                                                                                                                                                                                                                                                                                                                                                                                                                                                                                                                                                                                                                                                                                                                                                                   | 35%                                                                                                                                                                                                                                                                                                                                                                                                                                                                                                                                                                                                                                                                                                                                                                                                                                                                                                                                                                                                                                                                                                                                                                                                                                                         |                                                                                                                                                                                                                                                                                                                                                                                                                                                                                                                                                                                                                                                                                                                                                                                                                                                                                                                                                                                                                                                                                                                                                                                                                                                                                                                                                                                                                                                                                                                                                                                                                                                                                                                                                                                                                                                                                                                                                                                                                                            |  |                |   |             |         |           |             |         |            |          |         |  |  |                      |   |             |                                                       |                       |             |                                                       |           |          |                                                       |  |  |                       |   |             |           |                           |             |           |               |          |            |  |  |       |       |   |             |     |     |  |             |     |     |              |
| <i>IVT4</i>                                                                                                                                                                                                    | 21%                                                                                                                                                                                                                                                                                                                                                                                                                                                                                                                                                                                                                                                                                                                                                                                                                                                                                                                                                                                                                                                                                                                                                                                                                                                                   | 30%                                                                                                                                                                                                                                                                                                                                                                                                                                                                                                                                                                                                                                                                                                                                                                                                                                                                                                                                                                                                                                                                                                                                                                                                                                                         | $<0.05$ vs L                                                                                                                                                                                                                                                                                                                                                                                                                                                                                                                                                                                                                                                                                                                                                                                                                                                                                                                                                                                                                                                                                                                                                                                                                                                                                                                                                                                                                                                                                                                                                                                                                                                                                                                                                                                                                                                                                                                                                                                                                               |  |                |   |             |         |           |             |         |            |          |         |  |  |                      |   |             |                                                       |                       |             |                                                       |           |          |                                                       |  |  |                       |   |             |           |                           |             |           |               |          |            |  |  |       |       |   |             |     |     |  |             |     |     |              |

|                                                                                                                                                                                                        |                                                                                                                                                                                                                                                                                                                                                                                                                                                                                                                                                                                                                                                                                                                                                                                                                                                                                                                                                                                                                                                                                                  |                                                                                                                                                                                                                                                                                                                                                                                                                                                                                                                                                                                                                                                                                                                                                             | <i>L</i> 31% 37%                                                                                                                                                                                                                                                                                                                                                                                                                                                                                                                                                                                                                                                                                                                                                                                                                                                                                                                                                                                                                                                                                                                                                   |  |                |   |             |       |           |          |       |  |  |  |   |             |                  |            |  |               |  |  |                  |  |          |                  |  |  |               |  |  |                  |  |  |                |   |            |      |                                                                   |          |     |  |
|--------------------------------------------------------------------------------------------------------------------------------------------------------------------------------------------------------|--------------------------------------------------------------------------------------------------------------------------------------------------------------------------------------------------------------------------------------------------------------------------------------------------------------------------------------------------------------------------------------------------------------------------------------------------------------------------------------------------------------------------------------------------------------------------------------------------------------------------------------------------------------------------------------------------------------------------------------------------------------------------------------------------------------------------------------------------------------------------------------------------------------------------------------------------------------------------------------------------------------------------------------------------------------------------------------------------|-------------------------------------------------------------------------------------------------------------------------------------------------------------------------------------------------------------------------------------------------------------------------------------------------------------------------------------------------------------------------------------------------------------------------------------------------------------------------------------------------------------------------------------------------------------------------------------------------------------------------------------------------------------------------------------------------------------------------------------------------------------|--------------------------------------------------------------------------------------------------------------------------------------------------------------------------------------------------------------------------------------------------------------------------------------------------------------------------------------------------------------------------------------------------------------------------------------------------------------------------------------------------------------------------------------------------------------------------------------------------------------------------------------------------------------------------------------------------------------------------------------------------------------------------------------------------------------------------------------------------------------------------------------------------------------------------------------------------------------------------------------------------------------------------------------------------------------------------------------------------------------------------------------------------------------------|--|----------------|---|-------------|-------|-----------|----------|-------|--|--|--|---|-------------|------------------|------------|--|---------------|--|--|------------------|--|----------|------------------|--|--|---------------|--|--|------------------|--|--|----------------|---|------------|------|-------------------------------------------------------------------|----------|-----|--|
| <p><b>Gillies 2006 / 2007 / 2009 / Sutter 2004</b> [32,136-138]<br/><b>Australia</b></p> <p><b>Design:</b> 2-arm placebo-controlled RCT<br/><b>Follow-up:</b> 2 years, additional 3-year follow-up</p> | <p><b>N:</b> 69 eyes of 43 patients<br/><b>Inclusion criteria:</b> patients with persistent (<math>\geq 3</math> months after adequate laser treatment) DMO involving the central fovea, BCVA in the affected eye <math>\leq 6/9</math><br/><b>Exclusion criteria:</b> uncontrolled glaucoma, loss of vision due to other causes, systemic treatment with <math>&gt;5</math> mg prednisolone (or equivalent) daily, intercurrent severe systemic disease, any condition affecting follow-up or documentation<br/><b>Age:</b> 62.4 to 69.6 SD9.2 to 12.5 years<br/><b>Sex:</b> 52% female<br/><b>Diabetes type:</b> not reported<br/><b>HbA1c:</b> 7.63 to 8.28 SD1.12 to 1.41<br/><b>Baseline VA:</b> ETDRS letter score 60.5 to 61.3 SD11.9 to 13.2<br/><b>Baseline CMT:</b> 439 to 444 SD101 to 125 <math>\mu</math>m<br/><b>Comorbidities:</b> 25% pseudophakic</p>                                                                                                                                                                                                                           | <p><b>Group 1 (IVT, n=34 eyes):</b> 4 mg (0.1 ml) IV triamcinolone acetonide (mean 2.6 injections over 2 years)<br/><b>Group 2 (C, n=35 eyes):</b> placebo injection (subconjunctival saline injection) (mean 1.8 injections over 2 years)<br/><b>Regimen for all groups:</b> retreatment considered at each visit as long as treatments were at least 6 months apart (retreatment if VA decreased <math>\geq 5</math> letters from previous peak value and persistent CMT <math>&gt;250 \mu</math>m), if no improvement after 4 weeks, further laser treatment was applied (n=1 laser treatment in intervention group, n=16 in placebo group, p=0.0001)<br/><b>Laser ETDRS protocol</b></p>                                                                | <p><b>At 2 years</b></p> <p><b>BCVA (ETDRS):</b></p> <table border="1"> <thead> <tr> <th></th> <th>BCVA (letters)</th> <th>p</th> </tr> </thead> <tbody> <tr> <td><i>IVT</i></td> <td>+3.1</td> <td>0.01 vs C</td> </tr> <tr> <td><i>C</i></td> <td>-2.9</td> <td></td> </tr> </tbody> </table> <p><b>CVA gain categories</b></p> <table border="1"> <thead> <tr> <th></th> <th></th> <th>p</th> </tr> </thead> <tbody> <tr> <td><i>IVT</i></td> <td>+10 or more: 21%</td> <td>0.013 vs C</td> </tr> <tr> <td></td> <td>+9 to -9: 70%</td> <td></td> </tr> <tr> <td></td> <td>-10 or more: 9%</td> <td></td> </tr> <tr> <td><i>C</i></td> <td>+10 or more: 12%</td> <td></td> </tr> <tr> <td></td> <td>+9 to -9: 62%</td> <td></td> </tr> <tr> <td></td> <td>-10 or more: 25%</td> <td></td> </tr> </tbody> </table> <p><b>CMT (OCT):</b></p> <table border="1"> <thead> <tr> <th></th> <th>CMT (<math>\mu</math>m)</th> <th>p</th> </tr> </thead> <tbody> <tr> <td><i>IVT</i></td> <td>-125</td> <td>0.009 vs C, difference between groups 59 <math>\mu</math>m (95% CI 15, 104)</td> </tr> <tr> <td><i>C</i></td> <td>-75</td> <td></td> </tr> </tbody> </table> |  | BCVA (letters) | p | <i>IVT</i>  | +3.1  | 0.01 vs C | <i>C</i> | -2.9  |  |  |  | p | <i>IVT</i>  | +10 or more: 21% | 0.013 vs C |  | +9 to -9: 70% |  |  | -10 or more: 9%  |  | <i>C</i> | +10 or more: 12% |  |  | +9 to -9: 62% |  |  | -10 or more: 25% |  |  | CMT ( $\mu$ m) | p | <i>IVT</i> | -125 | 0.009 vs C, difference between groups 59 $\mu$ m (95% CI 15, 104) | <i>C</i> | -75 |  |
|                                                                                                                                                                                                        | BCVA (letters)                                                                                                                                                                                                                                                                                                                                                                                                                                                                                                                                                                                                                                                                                                                                                                                                                                                                                                                                                                                                                                                                                   | p                                                                                                                                                                                                                                                                                                                                                                                                                                                                                                                                                                                                                                                                                                                                                           |                                                                                                                                                                                                                                                                                                                                                                                                                                                                                                                                                                                                                                                                                                                                                                                                                                                                                                                                                                                                                                                                                                                                                                    |  |                |   |             |       |           |          |       |  |  |  |   |             |                  |            |  |               |  |  |                  |  |          |                  |  |  |               |  |  |                  |  |  |                |   |            |      |                                                                   |          |     |  |
| <i>IVT</i>                                                                                                                                                                                             | +3.1                                                                                                                                                                                                                                                                                                                                                                                                                                                                                                                                                                                                                                                                                                                                                                                                                                                                                                                                                                                                                                                                                             | 0.01 vs C                                                                                                                                                                                                                                                                                                                                                                                                                                                                                                                                                                                                                                                                                                                                                   |                                                                                                                                                                                                                                                                                                                                                                                                                                                                                                                                                                                                                                                                                                                                                                                                                                                                                                                                                                                                                                                                                                                                                                    |  |                |   |             |       |           |          |       |  |  |  |   |             |                  |            |  |               |  |  |                  |  |          |                  |  |  |               |  |  |                  |  |  |                |   |            |      |                                                                   |          |     |  |
| <i>C</i>                                                                                                                                                                                               | -2.9                                                                                                                                                                                                                                                                                                                                                                                                                                                                                                                                                                                                                                                                                                                                                                                                                                                                                                                                                                                                                                                                                             |                                                                                                                                                                                                                                                                                                                                                                                                                                                                                                                                                                                                                                                                                                                                                             |                                                                                                                                                                                                                                                                                                                                                                                                                                                                                                                                                                                                                                                                                                                                                                                                                                                                                                                                                                                                                                                                                                                                                                    |  |                |   |             |       |           |          |       |  |  |  |   |             |                  |            |  |               |  |  |                  |  |          |                  |  |  |               |  |  |                  |  |  |                |   |            |      |                                                                   |          |     |  |
|                                                                                                                                                                                                        |                                                                                                                                                                                                                                                                                                                                                                                                                                                                                                                                                                                                                                                                                                                                                                                                                                                                                                                                                                                                                                                                                                  | p                                                                                                                                                                                                                                                                                                                                                                                                                                                                                                                                                                                                                                                                                                                                                           |                                                                                                                                                                                                                                                                                                                                                                                                                                                                                                                                                                                                                                                                                                                                                                                                                                                                                                                                                                                                                                                                                                                                                                    |  |                |   |             |       |           |          |       |  |  |  |   |             |                  |            |  |               |  |  |                  |  |          |                  |  |  |               |  |  |                  |  |  |                |   |            |      |                                                                   |          |     |  |
| <i>IVT</i>                                                                                                                                                                                             | +10 or more: 21%                                                                                                                                                                                                                                                                                                                                                                                                                                                                                                                                                                                                                                                                                                                                                                                                                                                                                                                                                                                                                                                                                 | 0.013 vs C                                                                                                                                                                                                                                                                                                                                                                                                                                                                                                                                                                                                                                                                                                                                                  |                                                                                                                                                                                                                                                                                                                                                                                                                                                                                                                                                                                                                                                                                                                                                                                                                                                                                                                                                                                                                                                                                                                                                                    |  |                |   |             |       |           |          |       |  |  |  |   |             |                  |            |  |               |  |  |                  |  |          |                  |  |  |               |  |  |                  |  |  |                |   |            |      |                                                                   |          |     |  |
|                                                                                                                                                                                                        | +9 to -9: 70%                                                                                                                                                                                                                                                                                                                                                                                                                                                                                                                                                                                                                                                                                                                                                                                                                                                                                                                                                                                                                                                                                    |                                                                                                                                                                                                                                                                                                                                                                                                                                                                                                                                                                                                                                                                                                                                                             |                                                                                                                                                                                                                                                                                                                                                                                                                                                                                                                                                                                                                                                                                                                                                                                                                                                                                                                                                                                                                                                                                                                                                                    |  |                |   |             |       |           |          |       |  |  |  |   |             |                  |            |  |               |  |  |                  |  |          |                  |  |  |               |  |  |                  |  |  |                |   |            |      |                                                                   |          |     |  |
|                                                                                                                                                                                                        | -10 or more: 9%                                                                                                                                                                                                                                                                                                                                                                                                                                                                                                                                                                                                                                                                                                                                                                                                                                                                                                                                                                                                                                                                                  |                                                                                                                                                                                                                                                                                                                                                                                                                                                                                                                                                                                                                                                                                                                                                             |                                                                                                                                                                                                                                                                                                                                                                                                                                                                                                                                                                                                                                                                                                                                                                                                                                                                                                                                                                                                                                                                                                                                                                    |  |                |   |             |       |           |          |       |  |  |  |   |             |                  |            |  |               |  |  |                  |  |          |                  |  |  |               |  |  |                  |  |  |                |   |            |      |                                                                   |          |     |  |
| <i>C</i>                                                                                                                                                                                               | +10 or more: 12%                                                                                                                                                                                                                                                                                                                                                                                                                                                                                                                                                                                                                                                                                                                                                                                                                                                                                                                                                                                                                                                                                 |                                                                                                                                                                                                                                                                                                                                                                                                                                                                                                                                                                                                                                                                                                                                                             |                                                                                                                                                                                                                                                                                                                                                                                                                                                                                                                                                                                                                                                                                                                                                                                                                                                                                                                                                                                                                                                                                                                                                                    |  |                |   |             |       |           |          |       |  |  |  |   |             |                  |            |  |               |  |  |                  |  |          |                  |  |  |               |  |  |                  |  |  |                |   |            |      |                                                                   |          |     |  |
|                                                                                                                                                                                                        | +9 to -9: 62%                                                                                                                                                                                                                                                                                                                                                                                                                                                                                                                                                                                                                                                                                                                                                                                                                                                                                                                                                                                                                                                                                    |                                                                                                                                                                                                                                                                                                                                                                                                                                                                                                                                                                                                                                                                                                                                                             |                                                                                                                                                                                                                                                                                                                                                                                                                                                                                                                                                                                                                                                                                                                                                                                                                                                                                                                                                                                                                                                                                                                                                                    |  |                |   |             |       |           |          |       |  |  |  |   |             |                  |            |  |               |  |  |                  |  |          |                  |  |  |               |  |  |                  |  |  |                |   |            |      |                                                                   |          |     |  |
|                                                                                                                                                                                                        | -10 or more: 25%                                                                                                                                                                                                                                                                                                                                                                                                                                                                                                                                                                                                                                                                                                                                                                                                                                                                                                                                                                                                                                                                                 |                                                                                                                                                                                                                                                                                                                                                                                                                                                                                                                                                                                                                                                                                                                                                             |                                                                                                                                                                                                                                                                                                                                                                                                                                                                                                                                                                                                                                                                                                                                                                                                                                                                                                                                                                                                                                                                                                                                                                    |  |                |   |             |       |           |          |       |  |  |  |   |             |                  |            |  |               |  |  |                  |  |          |                  |  |  |               |  |  |                  |  |  |                |   |            |      |                                                                   |          |     |  |
|                                                                                                                                                                                                        | CMT ( $\mu$ m)                                                                                                                                                                                                                                                                                                                                                                                                                                                                                                                                                                                                                                                                                                                                                                                                                                                                                                                                                                                                                                                                                   | p                                                                                                                                                                                                                                                                                                                                                                                                                                                                                                                                                                                                                                                                                                                                                           |                                                                                                                                                                                                                                                                                                                                                                                                                                                                                                                                                                                                                                                                                                                                                                                                                                                                                                                                                                                                                                                                                                                                                                    |  |                |   |             |       |           |          |       |  |  |  |   |             |                  |            |  |               |  |  |                  |  |          |                  |  |  |               |  |  |                  |  |  |                |   |            |      |                                                                   |          |     |  |
| <i>IVT</i>                                                                                                                                                                                             | -125                                                                                                                                                                                                                                                                                                                                                                                                                                                                                                                                                                                                                                                                                                                                                                                                                                                                                                                                                                                                                                                                                             | 0.009 vs C, difference between groups 59 $\mu$ m (95% CI 15, 104)                                                                                                                                                                                                                                                                                                                                                                                                                                                                                                                                                                                                                                                                                           |                                                                                                                                                                                                                                                                                                                                                                                                                                                                                                                                                                                                                                                                                                                                                                                                                                                                                                                                                                                                                                                                                                                                                                    |  |                |   |             |       |           |          |       |  |  |  |   |             |                  |            |  |               |  |  |                  |  |          |                  |  |  |               |  |  |                  |  |  |                |   |            |      |                                                                   |          |     |  |
| <i>C</i>                                                                                                                                                                                               | -75                                                                                                                                                                                                                                                                                                                                                                                                                                                                                                                                                                                                                                                                                                                                                                                                                                                                                                                                                                                                                                                                                              |                                                                                                                                                                                                                                                                                                                                                                                                                                                                                                                                                                                                                                                                                                                                                             |                                                                                                                                                                                                                                                                                                                                                                                                                                                                                                                                                                                                                                                                                                                                                                                                                                                                                                                                                                                                                                                                                                                                                                    |  |                |   |             |       |           |          |       |  |  |  |   |             |                  |            |  |               |  |  |                  |  |          |                  |  |  |               |  |  |                  |  |  |                |   |            |      |                                                                   |          |     |  |
| <p><b>Gillies 2011</b>[33]<br/><b>Australia</b></p> <p><b>Design:</b> 2-arm RCT<br/><b>Follow-up:</b> 24 months</p>                                                                                    | <p><b>N:</b> 84 eyes of 54 patients<br/><b>Inclusion criteria:</b> DMO involving the central fovea, CMT <math>\geq 250 \mu</math>m, BCVA 17 to 70 letters (<math>\sim 20/40</math> to <math>20/400</math>), laser treatment could be safely delayed for 6 weeks without significant adverse effects<br/><b>Exclusion criteria:</b> uncontrolled glaucoma, controlled glaucoma but with a glaucomatous visual field defect, loss of vision resulting from other causes, systemic treatment with <math>&gt;5</math> mg prednisolone (or equivalent) daily, retinal laser treatment within 4 months, intraocular surgery within 6 months, concurrent severe systemic disease, any condition affecting follow-up or documentation<br/><b>Age:</b> 65.4 to 66.9 SD8.9 to 9.5 years<br/><b>Sex:</b> 38.1 to 47.6% female<br/><b>Diabetes type:</b> not reported<br/><b>HbA1c:</b> 7.81 to 8.02 SD1.44 to 1.63 %<br/><b>Baseline VA:</b> letter score 55.2 to 55.5 SD11.3 to 12.5<br/><b>Baseline CMT:</b> 482.1 to 477.4 SD122.7 to 155.5 <math>\mu</math>m<br/><b>Comorbidities:</b> not reported</p> | <p><b>Group 1 (IVTL, n=42 eyes):</b> 4 mg (0.1 ml) IV triamcinolone acetonide followed by laser treatment (at least 1 retreatment in 2<sup>nd</sup> year in 69%)<br/><b>Group 2 (L, n=42 eyes):</b> sham injection followed by laser treatment (at least 1 retreatment in 2<sup>nd</sup> year in 45%)<br/><b>Regimen for all groups:</b> retreatment with injection followed by laser at discretion of chief investigator, with at least 6 weeks between treatments; no retreatment if: (1) investigator considered the macula nearly flat and CMT <math>&lt;300 \mu</math>m; (2) VA was <math>\geq 79</math> letters (20/25) or VA had improved by <math>\geq 5</math> letters compared with the best VA after treatment or baseline acuity; (3) laser</p> | <p><b>At 24 months</b></p> <p><b>BCVA (ETDRS):</b></p> <table border="1"> <thead> <tr> <th></th> <th>BCVA (letters)</th> <th>p</th> </tr> </thead> <tbody> <tr> <td><i>I TL</i></td> <td>+0.76</td> <td>NS vs L</td> </tr> <tr> <td><i>L</i></td> <td>-1.49</td> <td></td> </tr> </tbody> </table> <p><b>BCVA gain categories</b></p> <table border="1"> <thead> <tr> <th></th> <th></th> <th>p</th> </tr> </thead> <tbody> <tr> <td><i>IVTL</i></td> <td>+10 or more: 36%</td> <td>0.049 vs L</td> </tr> <tr> <td></td> <td>+9 to -9: 31%</td> <td></td> </tr> <tr> <td></td> <td>-10 or more: 33%</td> <td></td> </tr> <tr> <td><i>L</i></td> <td>+10 or more: 17%</td> <td></td> </tr> <tr> <td></td> <td>+9 to -9: 59%</td> <td></td> </tr> <tr> <td></td> <td>-10 or more: 24%</td> <td></td> </tr> </tbody> </table> <p>Subgroups:</p> <ul style="list-style-type: none"> <li>BCVA outcome not significantly affected by cataract surgery</li> </ul> <p><b>CMT (OCT):</b></p> <table border="1"> <thead> <tr> <th></th> <th>CMT (<math>\mu</math>m)</th> <th>p</th> </tr> </thead> <tbody> <tr> <td></td> <td></td> <td></td> </tr> </tbody> </table>        |  | BCVA (letters) | p | <i>I TL</i> | +0.76 | NS vs L   | <i>L</i> | -1.49 |  |  |  | p | <i>IVTL</i> | +10 or more: 36% | 0.049 vs L |  | +9 to -9: 31% |  |  | -10 or more: 33% |  | <i>L</i> | +10 or more: 17% |  |  | +9 to -9: 59% |  |  | -10 or more: 24% |  |  | CMT ( $\mu$ m) | p |            |      |                                                                   |          |     |  |
|                                                                                                                                                                                                        | BCVA (letters)                                                                                                                                                                                                                                                                                                                                                                                                                                                                                                                                                                                                                                                                                                                                                                                                                                                                                                                                                                                                                                                                                   | p                                                                                                                                                                                                                                                                                                                                                                                                                                                                                                                                                                                                                                                                                                                                                           |                                                                                                                                                                                                                                                                                                                                                                                                                                                                                                                                                                                                                                                                                                                                                                                                                                                                                                                                                                                                                                                                                                                                                                    |  |                |   |             |       |           |          |       |  |  |  |   |             |                  |            |  |               |  |  |                  |  |          |                  |  |  |               |  |  |                  |  |  |                |   |            |      |                                                                   |          |     |  |
| <i>I TL</i>                                                                                                                                                                                            | +0.76                                                                                                                                                                                                                                                                                                                                                                                                                                                                                                                                                                                                                                                                                                                                                                                                                                                                                                                                                                                                                                                                                            | NS vs L                                                                                                                                                                                                                                                                                                                                                                                                                                                                                                                                                                                                                                                                                                                                                     |                                                                                                                                                                                                                                                                                                                                                                                                                                                                                                                                                                                                                                                                                                                                                                                                                                                                                                                                                                                                                                                                                                                                                                    |  |                |   |             |       |           |          |       |  |  |  |   |             |                  |            |  |               |  |  |                  |  |          |                  |  |  |               |  |  |                  |  |  |                |   |            |      |                                                                   |          |     |  |
| <i>L</i>                                                                                                                                                                                               | -1.49                                                                                                                                                                                                                                                                                                                                                                                                                                                                                                                                                                                                                                                                                                                                                                                                                                                                                                                                                                                                                                                                                            |                                                                                                                                                                                                                                                                                                                                                                                                                                                                                                                                                                                                                                                                                                                                                             |                                                                                                                                                                                                                                                                                                                                                                                                                                                                                                                                                                                                                                                                                                                                                                                                                                                                                                                                                                                                                                                                                                                                                                    |  |                |   |             |       |           |          |       |  |  |  |   |             |                  |            |  |               |  |  |                  |  |          |                  |  |  |               |  |  |                  |  |  |                |   |            |      |                                                                   |          |     |  |
|                                                                                                                                                                                                        |                                                                                                                                                                                                                                                                                                                                                                                                                                                                                                                                                                                                                                                                                                                                                                                                                                                                                                                                                                                                                                                                                                  | p                                                                                                                                                                                                                                                                                                                                                                                                                                                                                                                                                                                                                                                                                                                                                           |                                                                                                                                                                                                                                                                                                                                                                                                                                                                                                                                                                                                                                                                                                                                                                                                                                                                                                                                                                                                                                                                                                                                                                    |  |                |   |             |       |           |          |       |  |  |  |   |             |                  |            |  |               |  |  |                  |  |          |                  |  |  |               |  |  |                  |  |  |                |   |            |      |                                                                   |          |     |  |
| <i>IVTL</i>                                                                                                                                                                                            | +10 or more: 36%                                                                                                                                                                                                                                                                                                                                                                                                                                                                                                                                                                                                                                                                                                                                                                                                                                                                                                                                                                                                                                                                                 | 0.049 vs L                                                                                                                                                                                                                                                                                                                                                                                                                                                                                                                                                                                                                                                                                                                                                  |                                                                                                                                                                                                                                                                                                                                                                                                                                                                                                                                                                                                                                                                                                                                                                                                                                                                                                                                                                                                                                                                                                                                                                    |  |                |   |             |       |           |          |       |  |  |  |   |             |                  |            |  |               |  |  |                  |  |          |                  |  |  |               |  |  |                  |  |  |                |   |            |      |                                                                   |          |     |  |
|                                                                                                                                                                                                        | +9 to -9: 31%                                                                                                                                                                                                                                                                                                                                                                                                                                                                                                                                                                                                                                                                                                                                                                                                                                                                                                                                                                                                                                                                                    |                                                                                                                                                                                                                                                                                                                                                                                                                                                                                                                                                                                                                                                                                                                                                             |                                                                                                                                                                                                                                                                                                                                                                                                                                                                                                                                                                                                                                                                                                                                                                                                                                                                                                                                                                                                                                                                                                                                                                    |  |                |   |             |       |           |          |       |  |  |  |   |             |                  |            |  |               |  |  |                  |  |          |                  |  |  |               |  |  |                  |  |  |                |   |            |      |                                                                   |          |     |  |
|                                                                                                                                                                                                        | -10 or more: 33%                                                                                                                                                                                                                                                                                                                                                                                                                                                                                                                                                                                                                                                                                                                                                                                                                                                                                                                                                                                                                                                                                 |                                                                                                                                                                                                                                                                                                                                                                                                                                                                                                                                                                                                                                                                                                                                                             |                                                                                                                                                                                                                                                                                                                                                                                                                                                                                                                                                                                                                                                                                                                                                                                                                                                                                                                                                                                                                                                                                                                                                                    |  |                |   |             |       |           |          |       |  |  |  |   |             |                  |            |  |               |  |  |                  |  |          |                  |  |  |               |  |  |                  |  |  |                |   |            |      |                                                                   |          |     |  |
| <i>L</i>                                                                                                                                                                                               | +10 or more: 17%                                                                                                                                                                                                                                                                                                                                                                                                                                                                                                                                                                                                                                                                                                                                                                                                                                                                                                                                                                                                                                                                                 |                                                                                                                                                                                                                                                                                                                                                                                                                                                                                                                                                                                                                                                                                                                                                             |                                                                                                                                                                                                                                                                                                                                                                                                                                                                                                                                                                                                                                                                                                                                                                                                                                                                                                                                                                                                                                                                                                                                                                    |  |                |   |             |       |           |          |       |  |  |  |   |             |                  |            |  |               |  |  |                  |  |          |                  |  |  |               |  |  |                  |  |  |                |   |            |      |                                                                   |          |     |  |
|                                                                                                                                                                                                        | +9 to -9: 59%                                                                                                                                                                                                                                                                                                                                                                                                                                                                                                                                                                                                                                                                                                                                                                                                                                                                                                                                                                                                                                                                                    |                                                                                                                                                                                                                                                                                                                                                                                                                                                                                                                                                                                                                                                                                                                                                             |                                                                                                                                                                                                                                                                                                                                                                                                                                                                                                                                                                                                                                                                                                                                                                                                                                                                                                                                                                                                                                                                                                                                                                    |  |                |   |             |       |           |          |       |  |  |  |   |             |                  |            |  |               |  |  |                  |  |          |                  |  |  |               |  |  |                  |  |  |                |   |            |      |                                                                   |          |     |  |
|                                                                                                                                                                                                        | -10 or more: 24%                                                                                                                                                                                                                                                                                                                                                                                                                                                                                                                                                                                                                                                                                                                                                                                                                                                                                                                                                                                                                                                                                 |                                                                                                                                                                                                                                                                                                                                                                                                                                                                                                                                                                                                                                                                                                                                                             |                                                                                                                                                                                                                                                                                                                                                                                                                                                                                                                                                                                                                                                                                                                                                                                                                                                                                                                                                                                                                                                                                                                                                                    |  |                |   |             |       |           |          |       |  |  |  |   |             |                  |            |  |               |  |  |                  |  |          |                  |  |  |               |  |  |                  |  |  |                |   |            |      |                                                                   |          |     |  |
|                                                                                                                                                                                                        | CMT ( $\mu$ m)                                                                                                                                                                                                                                                                                                                                                                                                                                                                                                                                                                                                                                                                                                                                                                                                                                                                                                                                                                                                                                                                                   | p                                                                                                                                                                                                                                                                                                                                                                                                                                                                                                                                                                                                                                                                                                                                                           |                                                                                                                                                                                                                                                                                                                                                                                                                                                                                                                                                                                                                                                                                                                                                                                                                                                                                                                                                                                                                                                                                                                                                                    |  |                |   |             |       |           |          |       |  |  |  |   |             |                  |            |  |               |  |  |                  |  |          |                  |  |  |               |  |  |                  |  |  |                |   |            |      |                                                                   |          |     |  |
|                                                                                                                                                                                                        |                                                                                                                                                                                                                                                                                                                                                                                                                                                                                                                                                                                                                                                                                                                                                                                                                                                                                                                                                                                                                                                                                                  |                                                                                                                                                                                                                                                                                                                                                                                                                                                                                                                                                                                                                                                                                                                                                             |                                                                                                                                                                                                                                                                                                                                                                                                                                                                                                                                                                                                                                                                                                                                                                                                                                                                                                                                                                                                                                                                                                                                                                    |  |                |   |             |       |           |          |       |  |  |  |   |             |                  |            |  |               |  |  |                  |  |          |                  |  |  |               |  |  |                  |  |  |                |   |            |      |                                                                   |          |     |  |

|                                                                                                                                  |                                                                                                                                                                                                                                                                                                                                                                                                                                                                                                                                                                                                                                                                                                                                                                                                                                                                            | treatment was considered by the investigator as inappropriate or had no potential for improvement                                                                                                                                                                                                                                                                                                                                                                                                                                                                                                                                                                              | <table border="1"> <tbody> <tr> <td><i>IVTL</i></td> <td>-137.1</td> <td>NS vs L</td> </tr> <tr> <td><i>L</i></td> <td>-109.6</td> <td></td> </tr> </tbody> </table>                                                                                                                                                                                                                                                                                                                                                                                                                                                                                                                                                                                                                                                                                                                                                                                    | <i>IVTL</i> | -137.1            | NS vs L | <i>L</i>   | -109.6                                          |                   |             |                                                 |              |                      |                                                 |  |            |                |   |             |                 |                                      |             |                  |                   |          |                 |  |
|----------------------------------------------------------------------------------------------------------------------------------|----------------------------------------------------------------------------------------------------------------------------------------------------------------------------------------------------------------------------------------------------------------------------------------------------------------------------------------------------------------------------------------------------------------------------------------------------------------------------------------------------------------------------------------------------------------------------------------------------------------------------------------------------------------------------------------------------------------------------------------------------------------------------------------------------------------------------------------------------------------------------|--------------------------------------------------------------------------------------------------------------------------------------------------------------------------------------------------------------------------------------------------------------------------------------------------------------------------------------------------------------------------------------------------------------------------------------------------------------------------------------------------------------------------------------------------------------------------------------------------------------------------------------------------------------------------------|---------------------------------------------------------------------------------------------------------------------------------------------------------------------------------------------------------------------------------------------------------------------------------------------------------------------------------------------------------------------------------------------------------------------------------------------------------------------------------------------------------------------------------------------------------------------------------------------------------------------------------------------------------------------------------------------------------------------------------------------------------------------------------------------------------------------------------------------------------------------------------------------------------------------------------------------------------|-------------|-------------------|---------|------------|-------------------------------------------------|-------------------|-------------|-------------------------------------------------|--------------|----------------------|-------------------------------------------------|--|------------|----------------|---|-------------|-----------------|--------------------------------------|-------------|------------------|-------------------|----------|-----------------|--|
| <i>IVTL</i>                                                                                                                      | -137.1                                                                                                                                                                                                                                                                                                                                                                                                                                                                                                                                                                                                                                                                                                                                                                                                                                                                     | NS vs L                                                                                                                                                                                                                                                                                                                                                                                                                                                                                                                                                                                                                                                                        |                                                                                                                                                                                                                                                                                                                                                                                                                                                                                                                                                                                                                                                                                                                                                                                                                                                                                                                                                         |             |                   |         |            |                                                 |                   |             |                                                 |              |                      |                                                 |  |            |                |   |             |                 |                                      |             |                  |                   |          |                 |  |
| <i>L</i>                                                                                                                         | -109.6                                                                                                                                                                                                                                                                                                                                                                                                                                                                                                                                                                                                                                                                                                                                                                                                                                                                     |                                                                                                                                                                                                                                                                                                                                                                                                                                                                                                                                                                                                                                                                                |                                                                                                                                                                                                                                                                                                                                                                                                                                                                                                                                                                                                                                                                                                                                                                                                                                                                                                                                                         |             |                   |         |            |                                                 |                   |             |                                                 |              |                      |                                                 |  |            |                |   |             |                 |                                      |             |                  |                   |          |                 |  |
| <p><b>Kim 2010</b>[45]<br/><b>Korea</b></p> <p><b>Design:</b> 2-arm RCT<br/><b>Follow-up:</b> 3 years</p>                        | <p><b>N:</b> 86 eyes of 75 patients<br/><b>Inclusion criteria:</b> diffuse DMO<br/><b>Exclusion criteria:</b> not reported<br/><b>Age:</b> not reported<br/><b>Sex:</b> not reported<br/><b>Diabetes type:</b> not reported<br/><b>HbA1c:</b> not reported<br/><b>Baseline VA:</b> not reported<br/><b>Baseline CMT:</b> not reported<br/><b>Comorbidities:</b> not reported</p>                                                                                                                                                                                                                                                                                                                                                                                                                                                                                           | <p><b>Group 1 (IVT, n=38 eyes):</b> 4 mg IV triamcinolone (1.88 additional treatments, completion 68.1%)<br/><b>Group 2 (IVTL, n=48 eyes):</b> macular laser photocoagulation 4 weeks after 4 mg IV triamcinolone (0.92 additional treatments, completion 77.1%)<br/><b>Regimen for all groups:</b> additional treatment possible, criteria not mentioned<br/><b>Laser protocol</b> not reported</p>                                                                                                                                                                                                                                                                           | <p><b>At 3 years</b><br/><b>BCVA:</b> not reported</p> <p><b>Outcomes related to DMO:</b></p> <table border="1"> <thead> <tr> <th></th> <th>no DMO recurrence</th> <th>p</th> </tr> </thead> <tbody> <tr> <td><i>IVT</i></td> <td>3.9%</td> <td></td> </tr> <tr> <td><i>IVTL</i></td> <td>24.3%</td> <td>0.028 vs IVT</td> </tr> <tr> <th colspan="3">time DMO not present</th> </tr> <tr> <td><i>IVT</i></td> <td>10.33 months</td> <td></td> </tr> <tr> <td><i>IVTL</i></td> <td>19.88 months</td> <td>0.027 vs IVT</td> </tr> </tbody> </table>                                                                                                                                                                                                                                                                                                                                                                                                      |             | no DMO recurrence | p       | <i>IVT</i> | 3.9%                                            |                   | <i>IVTL</i> | 24.3%                                           | 0.028 vs IVT | time DMO not present |                                                 |  | <i>IVT</i> | 10.33 months   |   | <i>IVTL</i> | 19.88 months    | 0.027 vs IVT                         |             |                  |                   |          |                 |  |
|                                                                                                                                  | no DMO recurrence                                                                                                                                                                                                                                                                                                                                                                                                                                                                                                                                                                                                                                                                                                                                                                                                                                                          | p                                                                                                                                                                                                                                                                                                                                                                                                                                                                                                                                                                                                                                                                              |                                                                                                                                                                                                                                                                                                                                                                                                                                                                                                                                                                                                                                                                                                                                                                                                                                                                                                                                                         |             |                   |         |            |                                                 |                   |             |                                                 |              |                      |                                                 |  |            |                |   |             |                 |                                      |             |                  |                   |          |                 |  |
| <i>IVT</i>                                                                                                                       | 3.9%                                                                                                                                                                                                                                                                                                                                                                                                                                                                                                                                                                                                                                                                                                                                                                                                                                                                       |                                                                                                                                                                                                                                                                                                                                                                                                                                                                                                                                                                                                                                                                                |                                                                                                                                                                                                                                                                                                                                                                                                                                                                                                                                                                                                                                                                                                                                                                                                                                                                                                                                                         |             |                   |         |            |                                                 |                   |             |                                                 |              |                      |                                                 |  |            |                |   |             |                 |                                      |             |                  |                   |          |                 |  |
| <i>IVTL</i>                                                                                                                      | 24.3%                                                                                                                                                                                                                                                                                                                                                                                                                                                                                                                                                                                                                                                                                                                                                                                                                                                                      | 0.028 vs IVT                                                                                                                                                                                                                                                                                                                                                                                                                                                                                                                                                                                                                                                                   |                                                                                                                                                                                                                                                                                                                                                                                                                                                                                                                                                                                                                                                                                                                                                                                                                                                                                                                                                         |             |                   |         |            |                                                 |                   |             |                                                 |              |                      |                                                 |  |            |                |   |             |                 |                                      |             |                  |                   |          |                 |  |
| time DMO not present                                                                                                             |                                                                                                                                                                                                                                                                                                                                                                                                                                                                                                                                                                                                                                                                                                                                                                                                                                                                            |                                                                                                                                                                                                                                                                                                                                                                                                                                                                                                                                                                                                                                                                                |                                                                                                                                                                                                                                                                                                                                                                                                                                                                                                                                                                                                                                                                                                                                                                                                                                                                                                                                                         |             |                   |         |            |                                                 |                   |             |                                                 |              |                      |                                                 |  |            |                |   |             |                 |                                      |             |                  |                   |          |                 |  |
| <i>IVT</i>                                                                                                                       | 10.33 months                                                                                                                                                                                                                                                                                                                                                                                                                                                                                                                                                                                                                                                                                                                                                                                                                                                               |                                                                                                                                                                                                                                                                                                                                                                                                                                                                                                                                                                                                                                                                                |                                                                                                                                                                                                                                                                                                                                                                                                                                                                                                                                                                                                                                                                                                                                                                                                                                                                                                                                                         |             |                   |         |            |                                                 |                   |             |                                                 |              |                      |                                                 |  |            |                |   |             |                 |                                      |             |                  |                   |          |                 |  |
| <i>IVTL</i>                                                                                                                      | 19.88 months                                                                                                                                                                                                                                                                                                                                                                                                                                                                                                                                                                                                                                                                                                                                                                                                                                                               | 0.027 vs IVT                                                                                                                                                                                                                                                                                                                                                                                                                                                                                                                                                                                                                                                                   |                                                                                                                                                                                                                                                                                                                                                                                                                                                                                                                                                                                                                                                                                                                                                                                                                                                                                                                                                         |             |                   |         |            |                                                 |                   |             |                                                 |              |                      |                                                 |  |            |                |   |             |                 |                                      |             |                  |                   |          |                 |  |
| <p><b>Lam 2007</b>[34]<br/><b>Hong Kong</b></p> <p><b>Design:</b> 3-arm RCT<br/><b>Follow-up:</b> 6 months (2 years planned)</p> | <p><b>N:</b> 111 eyes of 111 patients<br/><b>Inclusion criteria:</b> &gt;18 years, type 1 or 2 DM, clinically significant DMO (ETDRS), CMT <math>\geq</math>250 <math>\mu</math>m<br/><b>Exclusion criteria:</b> macular oedema due to causes other than diabetic maculopathy, signs of vitreomacular traction, proliferative diabetic retinopathy, aphakia, history of glaucoma or ocular hypertension, macular ischemia, any laser procedure within 3 months, ocular surgery within 6 months, significant media opacities<br/><b>Age:</b> 64.7 to 67.2 SD8.2 to 10.3 years<br/><b>Sex:</b> 42 to 59% female<br/><b>Diabetes type:</b> not reported<br/><b>HbA1c:</b> not reported<br/><b>Baseline VA:</b> ETDRS logMAR 0.64 to 0.72 SD0.34 to 0.36<br/><b>Baseline CMT:</b> 385 to 424 SD91 to 108 <math>\mu</math>m<br/><b>Comorbidities:</b> 66 to 84% phakic eyes</p> | <p><b>Group 1 (IVT, n=38 eyes):</b> 4 mg IV triamcinolone (no retreatments)<br/><b>Group 2 (IVTL, n=36 eyes):</b> 4 mg IV triamcinolone followed by grid laser photocoagulation (ETDRS) (laser treatment once the macular oedema had reduced to &lt;250 <math>\mu</math>m at the foveal center or at 1 to 2 months after injection, whichever was earlier)<br/><b>Group 3 (L, n=37 eyes):</b> grid laser photocoagulation (n=3 retreatments) (no retreatments)<br/><b>Regimen for all groups:</b> in case of recurrence or persistence of macular oedema, retreatment offered according to study group, at intervals no less than 4 months<br/><b>Laser ETDRS protocol</b></p> | <p><b>At 6 months</b><br/><b>BCVA (ETDRS):</b></p> <table border="1"> <thead> <tr> <th></th> <th>BCVA improvement</th> <th>p</th> </tr> </thead> <tbody> <tr> <td><i>IVT</i></td> <td>-0.7 SD 10.7 log MAR plus <math>\geq</math>15 letters: 5%</td> <td>NS between groups</td> </tr> <tr> <td><i>IVTL</i></td> <td>-1.1 SD 10.8 log MAR plus <math>\geq</math>15 letters: 3%</td> <td></td> </tr> <tr> <td><i>L</i></td> <td>-1.6 SD 11.5 log MAR plus <math>\geq</math>15 letters: 5%</td> <td></td> </tr> </tbody> </table> <p><b>CMT (OCT):</b></p> <table border="1"> <thead> <tr> <th></th> <th>CMT (<math>\mu</math>m)</th> <th>p</th> </tr> </thead> <tbody> <tr> <td><i>IVT</i></td> <td>342 SD124 [-54]</td> <td>NS between groups, &lt;0.01 vs baseline</td> </tr> <tr> <td><i>IVTL</i></td> <td>307 SD181 [-116]</td> <td>&lt;0.01 vs baseline</td> </tr> <tr> <td><i>L</i></td> <td>350 SD169 [-35]</td> <td></td> </tr> </tbody> </table> |             | BCVA improvement  | p       | <i>IVT</i> | -0.7 SD 10.7 log MAR plus $\geq$ 15 letters: 5% | NS between groups | <i>IVTL</i> | -1.1 SD 10.8 log MAR plus $\geq$ 15 letters: 3% |              | <i>L</i>             | -1.6 SD 11.5 log MAR plus $\geq$ 15 letters: 5% |  |            | CMT ( $\mu$ m) | p | <i>IVT</i>  | 342 SD124 [-54] | NS between groups, <0.01 vs baseline | <i>IVTL</i> | 307 SD181 [-116] | <0.01 vs baseline | <i>L</i> | 350 SD169 [-35] |  |
|                                                                                                                                  | BCVA improvement                                                                                                                                                                                                                                                                                                                                                                                                                                                                                                                                                                                                                                                                                                                                                                                                                                                           | p                                                                                                                                                                                                                                                                                                                                                                                                                                                                                                                                                                                                                                                                              |                                                                                                                                                                                                                                                                                                                                                                                                                                                                                                                                                                                                                                                                                                                                                                                                                                                                                                                                                         |             |                   |         |            |                                                 |                   |             |                                                 |              |                      |                                                 |  |            |                |   |             |                 |                                      |             |                  |                   |          |                 |  |
| <i>IVT</i>                                                                                                                       | -0.7 SD 10.7 log MAR plus $\geq$ 15 letters: 5%                                                                                                                                                                                                                                                                                                                                                                                                                                                                                                                                                                                                                                                                                                                                                                                                                            | NS between groups                                                                                                                                                                                                                                                                                                                                                                                                                                                                                                                                                                                                                                                              |                                                                                                                                                                                                                                                                                                                                                                                                                                                                                                                                                                                                                                                                                                                                                                                                                                                                                                                                                         |             |                   |         |            |                                                 |                   |             |                                                 |              |                      |                                                 |  |            |                |   |             |                 |                                      |             |                  |                   |          |                 |  |
| <i>IVTL</i>                                                                                                                      | -1.1 SD 10.8 log MAR plus $\geq$ 15 letters: 3%                                                                                                                                                                                                                                                                                                                                                                                                                                                                                                                                                                                                                                                                                                                                                                                                                            |                                                                                                                                                                                                                                                                                                                                                                                                                                                                                                                                                                                                                                                                                |                                                                                                                                                                                                                                                                                                                                                                                                                                                                                                                                                                                                                                                                                                                                                                                                                                                                                                                                                         |             |                   |         |            |                                                 |                   |             |                                                 |              |                      |                                                 |  |            |                |   |             |                 |                                      |             |                  |                   |          |                 |  |
| <i>L</i>                                                                                                                         | -1.6 SD 11.5 log MAR plus $\geq$ 15 letters: 5%                                                                                                                                                                                                                                                                                                                                                                                                                                                                                                                                                                                                                                                                                                                                                                                                                            |                                                                                                                                                                                                                                                                                                                                                                                                                                                                                                                                                                                                                                                                                |                                                                                                                                                                                                                                                                                                                                                                                                                                                                                                                                                                                                                                                                                                                                                                                                                                                                                                                                                         |             |                   |         |            |                                                 |                   |             |                                                 |              |                      |                                                 |  |            |                |   |             |                 |                                      |             |                  |                   |          |                 |  |
|                                                                                                                                  | CMT ( $\mu$ m)                                                                                                                                                                                                                                                                                                                                                                                                                                                                                                                                                                                                                                                                                                                                                                                                                                                             | p                                                                                                                                                                                                                                                                                                                                                                                                                                                                                                                                                                                                                                                                              |                                                                                                                                                                                                                                                                                                                                                                                                                                                                                                                                                                                                                                                                                                                                                                                                                                                                                                                                                         |             |                   |         |            |                                                 |                   |             |                                                 |              |                      |                                                 |  |            |                |   |             |                 |                                      |             |                  |                   |          |                 |  |
| <i>IVT</i>                                                                                                                       | 342 SD124 [-54]                                                                                                                                                                                                                                                                                                                                                                                                                                                                                                                                                                                                                                                                                                                                                                                                                                                            | NS between groups, <0.01 vs baseline                                                                                                                                                                                                                                                                                                                                                                                                                                                                                                                                                                                                                                           |                                                                                                                                                                                                                                                                                                                                                                                                                                                                                                                                                                                                                                                                                                                                                                                                                                                                                                                                                         |             |                   |         |            |                                                 |                   |             |                                                 |              |                      |                                                 |  |            |                |   |             |                 |                                      |             |                  |                   |          |                 |  |
| <i>IVTL</i>                                                                                                                      | 307 SD181 [-116]                                                                                                                                                                                                                                                                                                                                                                                                                                                                                                                                                                                                                                                                                                                                                                                                                                                           | <0.01 vs baseline                                                                                                                                                                                                                                                                                                                                                                                                                                                                                                                                                                                                                                                              |                                                                                                                                                                                                                                                                                                                                                                                                                                                                                                                                                                                                                                                                                                                                                                                                                                                                                                                                                         |             |                   |         |            |                                                 |                   |             |                                                 |              |                      |                                                 |  |            |                |   |             |                 |                                      |             |                  |                   |          |                 |  |
| <i>L</i>                                                                                                                         | 350 SD169 [-35]                                                                                                                                                                                                                                                                                                                                                                                                                                                                                                                                                                                                                                                                                                                                                                                                                                                            |                                                                                                                                                                                                                                                                                                                                                                                                                                                                                                                                                                                                                                                                                |                                                                                                                                                                                                                                                                                                                                                                                                                                                                                                                                                                                                                                                                                                                                                                                                                                                                                                                                                         |             |                   |         |            |                                                 |                   |             |                                                 |              |                      |                                                 |  |            |                |   |             |                 |                                      |             |                  |                   |          |                 |  |

| <p><b>Ockrim 2008 / Sivaprasad 2008</b><br/>[42,62]<br/>UK</p> <p><b>Design:</b> 2-arm RCT<br/><b>Follow-up:</b> 1 year</p> | <p><b>N:</b> 88 eyes of 88 patients<br/><b>Inclusion criteria:</b> clinically significant DMO persisting <math>\geq 4</math> months, <math>\geq 1</math> previous laser treatment, BCVA 6/12 to 3/60, VA in fellow eye <math>\geq 3/60</math>, duration visual loss <math>&lt; 24</math> months<br/><b>Exclusion criteria:</b> significant macular ischemia, baseline IO <math>&gt; 23</math> mmHg, glaucoma, coexistent renal disease, loss of VA due to other causes, previous vitrectomy, intraocular surgery within 3 months of study entry, previous inclusion in other DR trials, inability to return to follow-up, inability to give informed consent<br/><b>Age:</b> 62.3 to 64.8 SD7.5 to 10.1 years<br/><b>Sex:</b> 28.9 to 34.9% female<br/><b>Diabetes type:</b> 97.8 to 100% type 2 DM<br/><b>HbA1c:</b> 7 to 7.8 IQR6.5 to 8.7%<br/><b>Baseline VA:</b> ETDRS letter score 53.0 to 54.6 SD13.3 to 14.2<br/><b>Baseline CMT:</b> 410.4 to 413.4 SD127.8 to 134.1 <math>\mu\text{m}</math><br/><b>Comorbidities:</b> 17.8 to 19.5% PDR, 13.3 to 18.6% pseudophakia, 15 to 17.8% posterior vitreous detachment</p> | <p><b>Group 1 (IVT, n=43 eyes):</b> 4 mg IV triamcinolone (mean number of IVT injections 1.8 (range 1 to 3))<br/><b>Group 2 (L, n=45 eyes):</b> ETDRS laser photocoagulation (mean number of grid laser sessions 2.1 (range 1 to 3))<br/><b>Regimen for all groups:</b> patients retreated at 4 and 8 months if they had persistent macular oedema<br/><b>Laser ETDRS protocol</b></p> | <p><b>At 12 months</b></p> <p><b>BCVA (ETDRS):</b></p> <table border="1"> <thead> <tr> <th></th> <th>BCVA (letters)</th> <th>p</th> </tr> </thead> <tbody> <tr> <td><i>IVT</i></td> <td>-0.2</td> <td>NS vs L</td> </tr> <tr> <td><i>L</i></td> <td>+1.7</td> <td></td> </tr> <tr> <th colspan="3">plus <math>\geq 15</math> letters</th> </tr> <tr> <td><i>IVT</i></td> <td>4.8%</td> <td>NS vs L</td> </tr> <tr> <td><i>L</i></td> <td>12.2%</td> <td></td> </tr> </tbody> </table> <p><b>CMT (optical coherence tomography):</b></p> <table border="1"> <thead> <tr> <th></th> <th>CMT (<math>\mu\text{m}</math>)</th> <th>p</th> </tr> </thead> <tbody> <tr> <td><i>IVT</i></td> <td>-91.3</td> <td>NS vs L</td> </tr> <tr> <td><i>L</i></td> <td>-63.7</td> <td></td> </tr> </tbody> </table> |  | BCVA (letters) | p | <i>IVT</i> | -0.2 | NS vs L | <i>L</i> | +1.7 |  | plus $\geq 15$ letters |  |  | <i>IVT</i> | 4.8% | NS vs L | <i>L</i> | 12.2% |  |  | CMT ( $\mu\text{m}$ ) | p | <i>IVT</i> | -91.3 | NS vs L | <i>L</i> | -63.7 |  |
|-----------------------------------------------------------------------------------------------------------------------------|-------------------------------------------------------------------------------------------------------------------------------------------------------------------------------------------------------------------------------------------------------------------------------------------------------------------------------------------------------------------------------------------------------------------------------------------------------------------------------------------------------------------------------------------------------------------------------------------------------------------------------------------------------------------------------------------------------------------------------------------------------------------------------------------------------------------------------------------------------------------------------------------------------------------------------------------------------------------------------------------------------------------------------------------------------------------------------------------------------------------------------|----------------------------------------------------------------------------------------------------------------------------------------------------------------------------------------------------------------------------------------------------------------------------------------------------------------------------------------------------------------------------------------|----------------------------------------------------------------------------------------------------------------------------------------------------------------------------------------------------------------------------------------------------------------------------------------------------------------------------------------------------------------------------------------------------------------------------------------------------------------------------------------------------------------------------------------------------------------------------------------------------------------------------------------------------------------------------------------------------------------------------------------------------------------------------------------------------|--|----------------|---|------------|------|---------|----------|------|--|------------------------|--|--|------------|------|---------|----------|-------|--|--|-----------------------|---|------------|-------|---------|----------|-------|--|
|                                                                                                                             | BCVA (letters)                                                                                                                                                                                                                                                                                                                                                                                                                                                                                                                                                                                                                                                                                                                                                                                                                                                                                                                                                                                                                                                                                                                | p                                                                                                                                                                                                                                                                                                                                                                                      |                                                                                                                                                                                                                                                                                                                                                                                                                                                                                                                                                                                                                                                                                                                                                                                                    |  |                |   |            |      |         |          |      |  |                        |  |  |            |      |         |          |       |  |  |                       |   |            |       |         |          |       |  |
| <i>IVT</i>                                                                                                                  | -0.2                                                                                                                                                                                                                                                                                                                                                                                                                                                                                                                                                                                                                                                                                                                                                                                                                                                                                                                                                                                                                                                                                                                          | NS vs L                                                                                                                                                                                                                                                                                                                                                                                |                                                                                                                                                                                                                                                                                                                                                                                                                                                                                                                                                                                                                                                                                                                                                                                                    |  |                |   |            |      |         |          |      |  |                        |  |  |            |      |         |          |       |  |  |                       |   |            |       |         |          |       |  |
| <i>L</i>                                                                                                                    | +1.7                                                                                                                                                                                                                                                                                                                                                                                                                                                                                                                                                                                                                                                                                                                                                                                                                                                                                                                                                                                                                                                                                                                          |                                                                                                                                                                                                                                                                                                                                                                                        |                                                                                                                                                                                                                                                                                                                                                                                                                                                                                                                                                                                                                                                                                                                                                                                                    |  |                |   |            |      |         |          |      |  |                        |  |  |            |      |         |          |       |  |  |                       |   |            |       |         |          |       |  |
| plus $\geq 15$ letters                                                                                                      |                                                                                                                                                                                                                                                                                                                                                                                                                                                                                                                                                                                                                                                                                                                                                                                                                                                                                                                                                                                                                                                                                                                               |                                                                                                                                                                                                                                                                                                                                                                                        |                                                                                                                                                                                                                                                                                                                                                                                                                                                                                                                                                                                                                                                                                                                                                                                                    |  |                |   |            |      |         |          |      |  |                        |  |  |            |      |         |          |       |  |  |                       |   |            |       |         |          |       |  |
| <i>IVT</i>                                                                                                                  | 4.8%                                                                                                                                                                                                                                                                                                                                                                                                                                                                                                                                                                                                                                                                                                                                                                                                                                                                                                                                                                                                                                                                                                                          | NS vs L                                                                                                                                                                                                                                                                                                                                                                                |                                                                                                                                                                                                                                                                                                                                                                                                                                                                                                                                                                                                                                                                                                                                                                                                    |  |                |   |            |      |         |          |      |  |                        |  |  |            |      |         |          |       |  |  |                       |   |            |       |         |          |       |  |
| <i>L</i>                                                                                                                    | 12.2%                                                                                                                                                                                                                                                                                                                                                                                                                                                                                                                                                                                                                                                                                                                                                                                                                                                                                                                                                                                                                                                                                                                         |                                                                                                                                                                                                                                                                                                                                                                                        |                                                                                                                                                                                                                                                                                                                                                                                                                                                                                                                                                                                                                                                                                                                                                                                                    |  |                |   |            |      |         |          |      |  |                        |  |  |            |      |         |          |       |  |  |                       |   |            |       |         |          |       |  |
|                                                                                                                             | CMT ( $\mu\text{m}$ )                                                                                                                                                                                                                                                                                                                                                                                                                                                                                                                                                                                                                                                                                                                                                                                                                                                                                                                                                                                                                                                                                                         | p                                                                                                                                                                                                                                                                                                                                                                                      |                                                                                                                                                                                                                                                                                                                                                                                                                                                                                                                                                                                                                                                                                                                                                                                                    |  |                |   |            |      |         |          |      |  |                        |  |  |            |      |         |          |       |  |  |                       |   |            |       |         |          |       |  |
| <i>IVT</i>                                                                                                                  | -91.3                                                                                                                                                                                                                                                                                                                                                                                                                                                                                                                                                                                                                                                                                                                                                                                                                                                                                                                                                                                                                                                                                                                         | NS vs L                                                                                                                                                                                                                                                                                                                                                                                |                                                                                                                                                                                                                                                                                                                                                                                                                                                                                                                                                                                                                                                                                                                                                                                                    |  |                |   |            |      |         |          |      |  |                        |  |  |            |      |         |          |       |  |  |                       |   |            |       |         |          |       |  |
| <i>L</i>                                                                                                                    | -63.7                                                                                                                                                                                                                                                                                                                                                                                                                                                                                                                                                                                                                                                                                                                                                                                                                                                                                                                                                                                                                                                                                                                         |                                                                                                                                                                                                                                                                                                                                                                                        |                                                                                                                                                                                                                                                                                                                                                                                                                                                                                                                                                                                                                                                                                                                                                                                                    |  |                |   |            |      |         |          |      |  |                        |  |  |            |      |         |          |       |  |  |                       |   |            |       |         |          |       |  |

Abbreviations: See table 2



Table 87: Trials assessing more than one drug

| Study                                                                                                                                                                 | Participants and baseline values                                                                                                                                                                                                                                                                                                                                                                                                                                                                                                                                                                                                                                                                                                                                                                                                                                                                                                                                                                      | Intervention                                                                                                                                                                                                                                                                                                                                                           | Outcome (change from baseline at study end)                                                                                                                                                                                                                                                                                                                                                                                                                                                                                                                                                                                                                                                                                                                                                                                                                                                                                                         |  |                       |   |            |                                                |                          |                |                                                 |               |          |                                               |  |  |                        |   |            |                       |                           |                |                       |            |          |                  |  |
|-----------------------------------------------------------------------------------------------------------------------------------------------------------------------|-------------------------------------------------------------------------------------------------------------------------------------------------------------------------------------------------------------------------------------------------------------------------------------------------------------------------------------------------------------------------------------------------------------------------------------------------------------------------------------------------------------------------------------------------------------------------------------------------------------------------------------------------------------------------------------------------------------------------------------------------------------------------------------------------------------------------------------------------------------------------------------------------------------------------------------------------------------------------------------------------------|------------------------------------------------------------------------------------------------------------------------------------------------------------------------------------------------------------------------------------------------------------------------------------------------------------------------------------------------------------------------|-----------------------------------------------------------------------------------------------------------------------------------------------------------------------------------------------------------------------------------------------------------------------------------------------------------------------------------------------------------------------------------------------------------------------------------------------------------------------------------------------------------------------------------------------------------------------------------------------------------------------------------------------------------------------------------------------------------------------------------------------------------------------------------------------------------------------------------------------------------------------------------------------------------------------------------------------------|--|-----------------------|---|------------|------------------------------------------------|--------------------------|----------------|-------------------------------------------------|---------------|----------|-----------------------------------------------|--|--|------------------------|---|------------|-----------------------|---------------------------|----------------|-----------------------|------------|----------|------------------|--|
| <b>Ahmadieh 2008</b> [31]<br><b>Iran</b><br><b>Design:</b> 3-arm placebo-controlled RCT<br><b>Follow-up:</b> 24 weeks                                                 | <b>N:</b> 115 eyes of 101 patients<br><b>Inclusion criteria:</b> eyes with clinically significant DMO unresponsive to previous macular laser photocoagulation (last session >3 months prior)<br><b>Exclusion criteria:</b> visual acuity $\geq 20/40$ ; history of cataract surgery within past 6 months; prior intraocular injection or vitrectomy, glaucoma or ocular hypertension; PDR with high-risk characteristics; vitreous hemorrhage; significant media opacity; presence of traction on the macula; pregnancy; serum creatinine $\geq 3$ mg/100 ml; monocular patients<br><b>Age:</b> 59.7 SD8.3 years (range 39 to 74)<br><b>Sex:</b> 50.5% female<br><b>Diabetes type:</b> not reported, 27.6% to 33.3% on insulin<br><b>HbA1c:</b> 9.35% to 10.06%<br><b>Baseline VA:</b> not reported<br><b>Baseline CMT:</b> not reported<br><b>Comorbidities:</b> (percentage of eyes) 13.9% history of cataract surgery, 81.7% NPDR, 4.3% early PDR, 13.9% regressed PDR; no iris neovascularization | <b>Group 1 (IVB, n=41 eyes):</b> bevacizumab 1.25 mg (0.05 ml)<br><b>Group 2 (IVB/IVT, n=37 eyes):</b> combined bevacizumab (1.25 mg (0.05 ml)) and triamcinolone (2 mg (0.05 ml)), followed by two injections of bevacizumab alone<br><b>Group 3 (C, n=37 eyes):</b> sham injection<br><b>Regimen for all groups:</b> 3 consecutive IV injections at 6-week intervals | <b>At 24 weeks</b><br><b>BCVA (Snellen chart):</b><br><table border="1"> <thead> <tr> <th></th> <th>BCVA (logMAR), 95% CI</th> <th>p</th> </tr> </thead> <tbody> <tr> <td><i>IVB</i></td> <td>-0.18 (-0.29, -0.08)<br/>[+9 letters (4, 14.5)]</td> <td>0.01 vs C, NS vs IVB/IVT</td> </tr> <tr> <td><i>IVB/IVT</i></td> <td>-0.21 (-0.30, -0.12)<br/>[+10.5 letters (6, 15)]</td> <td>0.006 vs C</td> </tr> <tr> <td><i>C</i></td> <td>-0.03 (-0.08, 0.14)<br/>[+1.5 letters (-7, 4)]</td> <td></td> </tr> </tbody> </table><br><b>CMT (OCT):</b><br><table border="1"> <thead> <tr> <th></th> <th>CMT (<math>\mu</math>m), 95% CI</th> <th>p</th> </tr> </thead> <tbody> <tr> <td><i>IVB</i></td> <td>-95.7 (-172.2, -19.3)</td> <td>0.012 vs C, NS vs IVB/IVT</td> </tr> <tr> <td><i>IVB/IVT</i></td> <td>-92.1 (-154.4, -29.7)</td> <td>0.022 vs C</td> </tr> <tr> <td><i>C</i></td> <td>34.9 (7.9, 61.9)</td> <td></td> </tr> </tbody> </table> |  | BCVA (logMAR), 95% CI | p | <i>IVB</i> | -0.18 (-0.29, -0.08)<br>[+9 letters (4, 14.5)] | 0.01 vs C, NS vs IVB/IVT | <i>IVB/IVT</i> | -0.21 (-0.30, -0.12)<br>[+10.5 letters (6, 15)] | 0.006 vs C    | <i>C</i> | -0.03 (-0.08, 0.14)<br>[+1.5 letters (-7, 4)] |  |  | CMT ( $\mu$ m), 95% CI | p | <i>IVB</i> | -95.7 (-172.2, -19.3) | 0.012 vs C, NS vs IVB/IVT | <i>IVB/IVT</i> | -92.1 (-154.4, -29.7) | 0.022 vs C | <i>C</i> | 34.9 (7.9, 61.9) |  |
|                                                                                                                                                                       | BCVA (logMAR), 95% CI                                                                                                                                                                                                                                                                                                                                                                                                                                                                                                                                                                                                                                                                                                                                                                                                                                                                                                                                                                                 | p                                                                                                                                                                                                                                                                                                                                                                      |                                                                                                                                                                                                                                                                                                                                                                                                                                                                                                                                                                                                                                                                                                                                                                                                                                                                                                                                                     |  |                       |   |            |                                                |                          |                |                                                 |               |          |                                               |  |  |                        |   |            |                       |                           |                |                       |            |          |                  |  |
| <i>IVB</i>                                                                                                                                                            | -0.18 (-0.29, -0.08)<br>[+9 letters (4, 14.5)]                                                                                                                                                                                                                                                                                                                                                                                                                                                                                                                                                                                                                                                                                                                                                                                                                                                                                                                                                        | 0.01 vs C, NS vs IVB/IVT                                                                                                                                                                                                                                                                                                                                               |                                                                                                                                                                                                                                                                                                                                                                                                                                                                                                                                                                                                                                                                                                                                                                                                                                                                                                                                                     |  |                       |   |            |                                                |                          |                |                                                 |               |          |                                               |  |  |                        |   |            |                       |                           |                |                       |            |          |                  |  |
| <i>IVB/IVT</i>                                                                                                                                                        | -0.21 (-0.30, -0.12)<br>[+10.5 letters (6, 15)]                                                                                                                                                                                                                                                                                                                                                                                                                                                                                                                                                                                                                                                                                                                                                                                                                                                                                                                                                       | 0.006 vs C                                                                                                                                                                                                                                                                                                                                                             |                                                                                                                                                                                                                                                                                                                                                                                                                                                                                                                                                                                                                                                                                                                                                                                                                                                                                                                                                     |  |                       |   |            |                                                |                          |                |                                                 |               |          |                                               |  |  |                        |   |            |                       |                           |                |                       |            |          |                  |  |
| <i>C</i>                                                                                                                                                              | -0.03 (-0.08, 0.14)<br>[+1.5 letters (-7, 4)]                                                                                                                                                                                                                                                                                                                                                                                                                                                                                                                                                                                                                                                                                                                                                                                                                                                                                                                                                         |                                                                                                                                                                                                                                                                                                                                                                        |                                                                                                                                                                                                                                                                                                                                                                                                                                                                                                                                                                                                                                                                                                                                                                                                                                                                                                                                                     |  |                       |   |            |                                                |                          |                |                                                 |               |          |                                               |  |  |                        |   |            |                       |                           |                |                       |            |          |                  |  |
|                                                                                                                                                                       | CMT ( $\mu$ m), 95% CI                                                                                                                                                                                                                                                                                                                                                                                                                                                                                                                                                                                                                                                                                                                                                                                                                                                                                                                                                                                | p                                                                                                                                                                                                                                                                                                                                                                      |                                                                                                                                                                                                                                                                                                                                                                                                                                                                                                                                                                                                                                                                                                                                                                                                                                                                                                                                                     |  |                       |   |            |                                                |                          |                |                                                 |               |          |                                               |  |  |                        |   |            |                       |                           |                |                       |            |          |                  |  |
| <i>IVB</i>                                                                                                                                                            | -95.7 (-172.2, -19.3)                                                                                                                                                                                                                                                                                                                                                                                                                                                                                                                                                                                                                                                                                                                                                                                                                                                                                                                                                                                 | 0.012 vs C, NS vs IVB/IVT                                                                                                                                                                                                                                                                                                                                              |                                                                                                                                                                                                                                                                                                                                                                                                                                                                                                                                                                                                                                                                                                                                                                                                                                                                                                                                                     |  |                       |   |            |                                                |                          |                |                                                 |               |          |                                               |  |  |                        |   |            |                       |                           |                |                       |            |          |                  |  |
| <i>IVB/IVT</i>                                                                                                                                                        | -92.1 (-154.4, -29.7)                                                                                                                                                                                                                                                                                                                                                                                                                                                                                                                                                                                                                                                                                                                                                                                                                                                                                                                                                                                 | 0.022 vs C                                                                                                                                                                                                                                                                                                                                                             |                                                                                                                                                                                                                                                                                                                                                                                                                                                                                                                                                                                                                                                                                                                                                                                                                                                                                                                                                     |  |                       |   |            |                                                |                          |                |                                                 |               |          |                                               |  |  |                        |   |            |                       |                           |                |                       |            |          |                  |  |
| <i>C</i>                                                                                                                                                              | 34.9 (7.9, 61.9)                                                                                                                                                                                                                                                                                                                                                                                                                                                                                                                                                                                                                                                                                                                                                                                                                                                                                                                                                                                      |                                                                                                                                                                                                                                                                                                                                                                        |                                                                                                                                                                                                                                                                                                                                                                                                                                                                                                                                                                                                                                                                                                                                                                                                                                                                                                                                                     |  |                       |   |            |                                                |                          |                |                                                 |               |          |                                               |  |  |                        |   |            |                       |                           |                |                       |            |          |                  |  |
| <b>ATEMD 2011 (Oliveira Neto 2010 / 2011)</b> [56]<br>Multicenter<br><b>Design:</b> 3-arm RCT<br><b>Follow-up:</b> 6 months<br><br><b>Note:</b> only 48.3% completion | <b>N:</b> 120 eyes of 120 patients<br><b>Inclusion criteria:</b> DMO, BCVA 20/40 to 20/400, CMT $\geq 275$ $\mu$ m<br><b>Exclusion criteria:</b> PDR, laser photocoagulation in previous 3 months, no IV corticosteroid or anti-VEGF in previous 3 months<br><b>Age:</b> not reported<br><b>Sex:</b> not reported<br><b>Diabetes type:</b> not reported<br><b>HbA1c:</b> not reported<br><b>Baseline VA:</b> not reported<br><b>Baseline CMT:</b> not reported<br><b>Comorbidities:</b> not reported                                                                                                                                                                                                                                                                                                                                                                                                                                                                                                  | <b>Group 1 (IVB, n=NR eyes):</b> 1.25 mg (0.05 ml) of IV bevacizumab<br><b>Group 2 (IVT, n=NR eyes):</b> 4 mg (0.1 ml) of IV triamcinolone acetate<br><b>Group 3 (IVB/IVT, n=NR eyes):</b> 1.25 mg (0.05 ml) of IV bevacizumab plus 4 mg (0.1 ml) of IV triamcinolone acetate<br><b>Regimen for all groups:</b> monthly injections                                     | <b>At 6 months</b><br><b>BCVA:</b> <ul style="list-style-type: none"> <li>no significant difference between groups (between 1.7 and 2.3 lines gained in the different groups in 2010 report (n=18))</li> </ul> <b>CMT (OCT):</b> <ul style="list-style-type: none"> <li>CMT reduced in all 3 groups (between 17 and 33% reduction in the different groups in 2010 report (n=18)); no significant difference between groups</li> </ul>                                                                                                                                                                                                                                                                                                                                                                                                                                                                                                               |  |                       |   |            |                                                |                          |                |                                                 |               |          |                                               |  |  |                        |   |            |                       |                           |                |                       |            |          |                  |  |
| <b>DRCR Network 2010 (Elman 2010, Elman 2011)</b> [21,46]<br><b>USA</b><br>Multicenter                                                                                | <b>N:</b> 854 eyes of 691 patients<br><b>Inclusion criteria:</b> $\geq 18$ years, type 1 or 2 DM; study eye: (1) BCVA letter score 78 to 24 (20/32 to 20/320), (2) definite retinal thickening due to DMO assessed to be main cause of visual loss, (3) retinal thickness measured on time domain OCT $\geq 250$ $\mu$ m in central                                                                                                                                                                                                                                                                                                                                                                                                                                                                                                                                                                                                                                                                   | <b>Group 1 (CPL, n=293 eyes):</b> sham injection plus prompt (within 3-10 days after injection) focal/grid photocoagulation<br><b>Group 2 (RPL, n=187 eyes):</b> 0.5 mg IV ranibizumab plus prompt focal/grid                                                                                                                                                          | <b>At 1 year</b><br><b>BCVA (E-ETDRS Visual Acuity Test):</b><br><table border="1"> <thead> <tr> <th></th> <th>BCVA (letters)</th> <th>p</th> </tr> </thead> <tbody> <tr> <td><i>CPL</i></td> <td>+3 SD13</td> <td></td> </tr> <tr> <td><i>RPL</i></td> <td>+9 SD11</td> <td>&lt;0.001 vs CPL</td> </tr> </tbody> </table>                                                                                                                                                                                                                                                                                                                                                                                                                                                                                                                                                                                                                          |  | BCVA (letters)        | p | <i>CPL</i> | +3 SD13                                        |                          | <i>RPL</i>     | +9 SD11                                         | <0.001 vs CPL |          |                                               |  |  |                        |   |            |                       |                           |                |                       |            |          |                  |  |
|                                                                                                                                                                       | BCVA (letters)                                                                                                                                                                                                                                                                                                                                                                                                                                                                                                                                                                                                                                                                                                                                                                                                                                                                                                                                                                                        | p                                                                                                                                                                                                                                                                                                                                                                      |                                                                                                                                                                                                                                                                                                                                                                                                                                                                                                                                                                                                                                                                                                                                                                                                                                                                                                                                                     |  |                       |   |            |                                                |                          |                |                                                 |               |          |                                               |  |  |                        |   |            |                       |                           |                |                       |            |          |                  |  |
| <i>CPL</i>                                                                                                                                                            | +3 SD13                                                                                                                                                                                                                                                                                                                                                                                                                                                                                                                                                                                                                                                                                                                                                                                                                                                                                                                                                                                               |                                                                                                                                                                                                                                                                                                                                                                        |                                                                                                                                                                                                                                                                                                                                                                                                                                                                                                                                                                                                                                                                                                                                                                                                                                                                                                                                                     |  |                       |   |            |                                                |                          |                |                                                 |               |          |                                               |  |  |                        |   |            |                       |                           |                |                       |            |          |                  |  |
| <i>RPL</i>                                                                                                                                                            | +9 SD11                                                                                                                                                                                                                                                                                                                                                                                                                                                                                                                                                                                                                                                                                                                                                                                                                                                                                                                                                                                               | <0.001 vs CPL                                                                                                                                                                                                                                                                                                                                                          |                                                                                                                                                                                                                                                                                                                                                                                                                                                                                                                                                                                                                                                                                                                                                                                                                                                                                                                                                     |  |                       |   |            |                                                |                          |                |                                                 |               |          |                                               |  |  |                        |   |            |                       |                           |                |                       |            |          |                  |  |

| Study                                                                                                                                         | Participants and baseline values                                                                                                                                                                                                                                                                                                                                                                                                                                                                                                                                                                                                                                                                                                                                                                                                                                                                                                                                                                                                                                                                                                                                                                                                                                                                                                                                                                                                   | Intervention                                                                                                                                                                                                                                                                                                                                                                                                                                                                                                                                                                                                                                                                                                                                                                                                                                                                                                                                                                                                                                                                                                                                                                                                                                                                                                                                                                                                                                                                                                                                                                                                                           | Outcome (change from baseline at study end)                                                                                                                                                                                                                                                                                                                                                                                                                                                                                                                                                                                                                                                                                                                                                                                                                                                                                                                                                                                                                                                                                                                                                                                                                                                                                                                                                                                                                                                                                                                                                                                                                                                                                                                                                                                                                                                                                                                                                                                                                                                                                                                                                                                                                                                                                                                                                                                                            |            |         |               |            |         |           |            |                  |  |  |               |  |  |                  |  |            |                  |               |  |               |  |  |                 |  |            |                  |               |  |               |  |  |                 |  |            |                  |           |  |               |  |  |                  |  |  |                |   |            |            |  |            |            |               |            |            |               |            |            |               |
|-----------------------------------------------------------------------------------------------------------------------------------------------|------------------------------------------------------------------------------------------------------------------------------------------------------------------------------------------------------------------------------------------------------------------------------------------------------------------------------------------------------------------------------------------------------------------------------------------------------------------------------------------------------------------------------------------------------------------------------------------------------------------------------------------------------------------------------------------------------------------------------------------------------------------------------------------------------------------------------------------------------------------------------------------------------------------------------------------------------------------------------------------------------------------------------------------------------------------------------------------------------------------------------------------------------------------------------------------------------------------------------------------------------------------------------------------------------------------------------------------------------------------------------------------------------------------------------------|----------------------------------------------------------------------------------------------------------------------------------------------------------------------------------------------------------------------------------------------------------------------------------------------------------------------------------------------------------------------------------------------------------------------------------------------------------------------------------------------------------------------------------------------------------------------------------------------------------------------------------------------------------------------------------------------------------------------------------------------------------------------------------------------------------------------------------------------------------------------------------------------------------------------------------------------------------------------------------------------------------------------------------------------------------------------------------------------------------------------------------------------------------------------------------------------------------------------------------------------------------------------------------------------------------------------------------------------------------------------------------------------------------------------------------------------------------------------------------------------------------------------------------------------------------------------------------------------------------------------------------------|--------------------------------------------------------------------------------------------------------------------------------------------------------------------------------------------------------------------------------------------------------------------------------------------------------------------------------------------------------------------------------------------------------------------------------------------------------------------------------------------------------------------------------------------------------------------------------------------------------------------------------------------------------------------------------------------------------------------------------------------------------------------------------------------------------------------------------------------------------------------------------------------------------------------------------------------------------------------------------------------------------------------------------------------------------------------------------------------------------------------------------------------------------------------------------------------------------------------------------------------------------------------------------------------------------------------------------------------------------------------------------------------------------------------------------------------------------------------------------------------------------------------------------------------------------------------------------------------------------------------------------------------------------------------------------------------------------------------------------------------------------------------------------------------------------------------------------------------------------------------------------------------------------------------------------------------------------------------------------------------------------------------------------------------------------------------------------------------------------------------------------------------------------------------------------------------------------------------------------------------------------------------------------------------------------------------------------------------------------------------------------------------------------------------------------------------------------|------------|---------|---------------|------------|---------|-----------|------------|------------------|--|--|---------------|--|--|------------------|--|------------|------------------|---------------|--|---------------|--|--|-----------------|--|------------|------------------|---------------|--|---------------|--|--|-----------------|--|------------|------------------|-----------|--|---------------|--|--|------------------|--|--|----------------|---|------------|------------|--|------------|------------|---------------|------------|------------|---------------|------------|------------|---------------|
| <p><b>Design:</b> 4-arm placebo-controlled RCT</p> <p><b>Follow-up:</b> 1-2 years; 2 years extension (Elman 2011) for consenting patients</p> | <p>subfield (2 study eyes per patient could be included if both were eligible at study entry)</p> <p><b>Exclusion criteria:</b> (1) treatment for DMO within the prior 3 months, (2) panretinal photocoagulation within the prior 4 months or anticipated need for panretinal photocoagulation within the next 6 months, (3) major ocular surgery within the prior 4 months, (4) history of open-angle glaucoma or steroid-induced IOP elevation, requiring IOP-lowering treatment, (5) IOP <math>\geq 25</math> mmHg; systolic pressure <math>&gt; 180</math> mmHg, diastolic pressure <math>&gt; 110</math> mmHg; myocardial infarction, other cardiac event requiring hospitalization, cerebrovascular accident, transient ischemic attack, treatment for acute congestive heart failure within 4 months before randomization</p> <p><b>Age:</b> median 62 to 64 years (25<sup>th</sup>, 75<sup>th</sup> centile 55 to 58, 69 to 70)</p> <p><b>Sex:</b> 41 to 46% female</p> <p><b>Diabetes type:</b> 6 to 9% type 1 DM, 89 to 92% type 2 DM, 2 to 3% uncertain</p> <p><b>HbA1c:</b> median 7.3 to 7.5% (25<sup>th</sup>, 75<sup>th</sup> centile 6.5 to 6.7, 8.3 to 8.6)</p> <p><b>Baseline VA:</b> letter score 63 SD12 (~20/63 SD2.4 lines)</p> <p><b>Baseline CMT:</b> 405 SD134 <math>\mu</math>m</p> <p><b>Comorbidities:</b> 60 to 67% prior treatment for DMO; 61 to 68% with NPDR, 26 to 36% with PDR or PDR scars</p> | <p>photocoagulation</p> <p><b>Group 3 (RDL, n=188 eyes):</b> 0.5 mg IV ranibizumab plus deferred (<math>\geq 24</math> weeks) focal/grid photocoagulation</p> <p><b>Group 4 (TPL, n=186 eyes):</b> 4 mg IV triamcinolone plus prompt focal/grid photocoagulation</p> <p><b>Regimen for all groups:</b> Baseline treatment 0.5 mg IV ranibizumab and 4 mg preservative free triamcinolone; study treatment every 4 weeks up to 12 weeks, then retreatment algorithm: 16 to 20 weeks, monthly retreatment unless 'success' criteria were met (visual acuity letter score <math>\geq 84</math> (20/20) or OCT central subfield thickness <math>&lt; 250</math> <math>\mu</math>m); 24 to 48 weeks, patients subdivided (according to predefined criteria) into 'success', 'improvement', 'no improvement' or 'failure'; 'improvement' group continued treatment, other groups treated at investigator discretion; alternative treatment permitted if eye met criteria for 'failure' or 'futility'.</p> <p>In the case of retreatment, ranibizumab could be given as often as every 4 weeks, and triamcinolone every 16 weeks (with sham injections as often as every 4 weeks). Retreatments for focal/grid laser (after <math>\geq 13</math> weeks from previous treatment) if there was oedema involving or threatening the center of the macula and if complete laser had not been given; retreatment algorithms facilitated by web-based real-time data entry system. Median number of drug injections before 1 year visit was 8-9 for ranibizumab, 3 for triamcinolone, and 5 sham injections. Retreatments between 1 and 2 years</p> | <p><b>Outcome (change from baseline at study end)</b></p> <table border="1"> <tr> <td><b>RDL</b></td> <td>+9 SD12</td> <td>&lt;0.001 vs CPL</td> </tr> <tr> <td><b>TPL</b></td> <td>+4 SD13</td> <td>NS vs CPL</td> </tr> </table> <p><b>BCVA gain categories (letters)</b></p> <table border="1"> <tr> <td><b>CPL</b></td> <td>+10 or more: 28%</td> <td></td> </tr> <tr> <td></td> <td>+9 to -9: 59%</td> <td></td> </tr> <tr> <td></td> <td>-10 or more: 13%</td> <td></td> </tr> <tr> <td><b>RPL</b></td> <td>+10 or more: 50%</td> <td>&lt;0.001 vs CPL</td> </tr> <tr> <td></td> <td>+9 to -9: 45%</td> <td></td> </tr> <tr> <td></td> <td>-10 or more: 4%</td> <td></td> </tr> <tr> <td><b>RDL</b></td> <td>+10 or more: 47%</td> <td>&lt;0.001 vs CPL</td> </tr> <tr> <td></td> <td>+9 to -9: 51%</td> <td></td> </tr> <tr> <td></td> <td>-10 or more: 3%</td> <td></td> </tr> <tr> <td><b>TPL</b></td> <td>+10 or more: 33%</td> <td>NS vs CPL</td> </tr> <tr> <td></td> <td>+9 to -9: 52%</td> <td></td> </tr> <tr> <td></td> <td>-10 or more: 14%</td> <td></td> </tr> </table> <p>Subgroups:</p> <ul style="list-style-type: none"> <li>BCVA results in TPL group substantially better for pseudophakic eyes than for phakic eyes (comparable to results for RPL and RDL groups) (p not reported)</li> <li>no difference in results according to prior treatment for DMO, baseline VA, baseline CMT, baseline level of retinopathy, focal or diffuse oedema</li> </ul> <p><b>CMT (OCT):</b></p> <table border="1"> <thead> <tr> <th></th> <th>CMT (<math>\mu</math>m)</th> <th>p</th> </tr> </thead> <tbody> <tr> <td><b>CPL</b></td> <td>-102 SD151</td> <td></td> </tr> <tr> <td><b>RPL</b></td> <td>-131 SD129</td> <td>&lt;0.001 vs CPL</td> </tr> <tr> <td><b>RDL</b></td> <td>-137 SD136</td> <td>&lt;0.001 vs CPL</td> </tr> <tr> <td><b>TPL</b></td> <td>-127 SD140</td> <td>&lt;0.001 vs CPL</td> </tr> </tbody> </table> <p>Subgroups:</p> <ul style="list-style-type: none"> <li>pattern of CMT decrease similar for groups with CMT <math>&lt; 400</math> <math>\mu</math>m and <math>\geq 400</math> <math>\mu</math>m at baseline</li> <li>Significantly more patients with severe NPDR or worse improved by 2 levels or more in the ranibizumab groups (28%, no significant change in the other groups)</li> </ul> <p><b>At 2 years (expanded results, Elman 2011)</b></p> <p><b>BCVA (E-ETDRS Visual Acuity Test):</b></p> | <b>RDL</b> | +9 SD12 | <0.001 vs CPL | <b>TPL</b> | +4 SD13 | NS vs CPL | <b>CPL</b> | +10 or more: 28% |  |  | +9 to -9: 59% |  |  | -10 or more: 13% |  | <b>RPL</b> | +10 or more: 50% | <0.001 vs CPL |  | +9 to -9: 45% |  |  | -10 or more: 4% |  | <b>RDL</b> | +10 or more: 47% | <0.001 vs CPL |  | +9 to -9: 51% |  |  | -10 or more: 3% |  | <b>TPL</b> | +10 or more: 33% | NS vs CPL |  | +9 to -9: 52% |  |  | -10 or more: 14% |  |  | CMT ( $\mu$ m) | p | <b>CPL</b> | -102 SD151 |  | <b>RPL</b> | -131 SD129 | <0.001 vs CPL | <b>RDL</b> | -137 SD136 | <0.001 vs CPL | <b>TPL</b> | -127 SD140 | <0.001 vs CPL |
| <b>RDL</b>                                                                                                                                    | +9 SD12                                                                                                                                                                                                                                                                                                                                                                                                                                                                                                                                                                                                                                                                                                                                                                                                                                                                                                                                                                                                                                                                                                                                                                                                                                                                                                                                                                                                                            | <0.001 vs CPL                                                                                                                                                                                                                                                                                                                                                                                                                                                                                                                                                                                                                                                                                                                                                                                                                                                                                                                                                                                                                                                                                                                                                                                                                                                                                                                                                                                                                                                                                                                                                                                                                          |                                                                                                                                                                                                                                                                                                                                                                                                                                                                                                                                                                                                                                                                                                                                                                                                                                                                                                                                                                                                                                                                                                                                                                                                                                                                                                                                                                                                                                                                                                                                                                                                                                                                                                                                                                                                                                                                                                                                                                                                                                                                                                                                                                                                                                                                                                                                                                                                                                                        |            |         |               |            |         |           |            |                  |  |  |               |  |  |                  |  |            |                  |               |  |               |  |  |                 |  |            |                  |               |  |               |  |  |                 |  |            |                  |           |  |               |  |  |                  |  |  |                |   |            |            |  |            |            |               |            |            |               |            |            |               |
| <b>TPL</b>                                                                                                                                    | +4 SD13                                                                                                                                                                                                                                                                                                                                                                                                                                                                                                                                                                                                                                                                                                                                                                                                                                                                                                                                                                                                                                                                                                                                                                                                                                                                                                                                                                                                                            | NS vs CPL                                                                                                                                                                                                                                                                                                                                                                                                                                                                                                                                                                                                                                                                                                                                                                                                                                                                                                                                                                                                                                                                                                                                                                                                                                                                                                                                                                                                                                                                                                                                                                                                                              |                                                                                                                                                                                                                                                                                                                                                                                                                                                                                                                                                                                                                                                                                                                                                                                                                                                                                                                                                                                                                                                                                                                                                                                                                                                                                                                                                                                                                                                                                                                                                                                                                                                                                                                                                                                                                                                                                                                                                                                                                                                                                                                                                                                                                                                                                                                                                                                                                                                        |            |         |               |            |         |           |            |                  |  |  |               |  |  |                  |  |            |                  |               |  |               |  |  |                 |  |            |                  |               |  |               |  |  |                 |  |            |                  |           |  |               |  |  |                  |  |  |                |   |            |            |  |            |            |               |            |            |               |            |            |               |
| <b>CPL</b>                                                                                                                                    | +10 or more: 28%                                                                                                                                                                                                                                                                                                                                                                                                                                                                                                                                                                                                                                                                                                                                                                                                                                                                                                                                                                                                                                                                                                                                                                                                                                                                                                                                                                                                                   |                                                                                                                                                                                                                                                                                                                                                                                                                                                                                                                                                                                                                                                                                                                                                                                                                                                                                                                                                                                                                                                                                                                                                                                                                                                                                                                                                                                                                                                                                                                                                                                                                                        |                                                                                                                                                                                                                                                                                                                                                                                                                                                                                                                                                                                                                                                                                                                                                                                                                                                                                                                                                                                                                                                                                                                                                                                                                                                                                                                                                                                                                                                                                                                                                                                                                                                                                                                                                                                                                                                                                                                                                                                                                                                                                                                                                                                                                                                                                                                                                                                                                                                        |            |         |               |            |         |           |            |                  |  |  |               |  |  |                  |  |            |                  |               |  |               |  |  |                 |  |            |                  |               |  |               |  |  |                 |  |            |                  |           |  |               |  |  |                  |  |  |                |   |            |            |  |            |            |               |            |            |               |            |            |               |
|                                                                                                                                               | +9 to -9: 59%                                                                                                                                                                                                                                                                                                                                                                                                                                                                                                                                                                                                                                                                                                                                                                                                                                                                                                                                                                                                                                                                                                                                                                                                                                                                                                                                                                                                                      |                                                                                                                                                                                                                                                                                                                                                                                                                                                                                                                                                                                                                                                                                                                                                                                                                                                                                                                                                                                                                                                                                                                                                                                                                                                                                                                                                                                                                                                                                                                                                                                                                                        |                                                                                                                                                                                                                                                                                                                                                                                                                                                                                                                                                                                                                                                                                                                                                                                                                                                                                                                                                                                                                                                                                                                                                                                                                                                                                                                                                                                                                                                                                                                                                                                                                                                                                                                                                                                                                                                                                                                                                                                                                                                                                                                                                                                                                                                                                                                                                                                                                                                        |            |         |               |            |         |           |            |                  |  |  |               |  |  |                  |  |            |                  |               |  |               |  |  |                 |  |            |                  |               |  |               |  |  |                 |  |            |                  |           |  |               |  |  |                  |  |  |                |   |            |            |  |            |            |               |            |            |               |            |            |               |
|                                                                                                                                               | -10 or more: 13%                                                                                                                                                                                                                                                                                                                                                                                                                                                                                                                                                                                                                                                                                                                                                                                                                                                                                                                                                                                                                                                                                                                                                                                                                                                                                                                                                                                                                   |                                                                                                                                                                                                                                                                                                                                                                                                                                                                                                                                                                                                                                                                                                                                                                                                                                                                                                                                                                                                                                                                                                                                                                                                                                                                                                                                                                                                                                                                                                                                                                                                                                        |                                                                                                                                                                                                                                                                                                                                                                                                                                                                                                                                                                                                                                                                                                                                                                                                                                                                                                                                                                                                                                                                                                                                                                                                                                                                                                                                                                                                                                                                                                                                                                                                                                                                                                                                                                                                                                                                                                                                                                                                                                                                                                                                                                                                                                                                                                                                                                                                                                                        |            |         |               |            |         |           |            |                  |  |  |               |  |  |                  |  |            |                  |               |  |               |  |  |                 |  |            |                  |               |  |               |  |  |                 |  |            |                  |           |  |               |  |  |                  |  |  |                |   |            |            |  |            |            |               |            |            |               |            |            |               |
| <b>RPL</b>                                                                                                                                    | +10 or more: 50%                                                                                                                                                                                                                                                                                                                                                                                                                                                                                                                                                                                                                                                                                                                                                                                                                                                                                                                                                                                                                                                                                                                                                                                                                                                                                                                                                                                                                   | <0.001 vs CPL                                                                                                                                                                                                                                                                                                                                                                                                                                                                                                                                                                                                                                                                                                                                                                                                                                                                                                                                                                                                                                                                                                                                                                                                                                                                                                                                                                                                                                                                                                                                                                                                                          |                                                                                                                                                                                                                                                                                                                                                                                                                                                                                                                                                                                                                                                                                                                                                                                                                                                                                                                                                                                                                                                                                                                                                                                                                                                                                                                                                                                                                                                                                                                                                                                                                                                                                                                                                                                                                                                                                                                                                                                                                                                                                                                                                                                                                                                                                                                                                                                                                                                        |            |         |               |            |         |           |            |                  |  |  |               |  |  |                  |  |            |                  |               |  |               |  |  |                 |  |            |                  |               |  |               |  |  |                 |  |            |                  |           |  |               |  |  |                  |  |  |                |   |            |            |  |            |            |               |            |            |               |            |            |               |
|                                                                                                                                               | +9 to -9: 45%                                                                                                                                                                                                                                                                                                                                                                                                                                                                                                                                                                                                                                                                                                                                                                                                                                                                                                                                                                                                                                                                                                                                                                                                                                                                                                                                                                                                                      |                                                                                                                                                                                                                                                                                                                                                                                                                                                                                                                                                                                                                                                                                                                                                                                                                                                                                                                                                                                                                                                                                                                                                                                                                                                                                                                                                                                                                                                                                                                                                                                                                                        |                                                                                                                                                                                                                                                                                                                                                                                                                                                                                                                                                                                                                                                                                                                                                                                                                                                                                                                                                                                                                                                                                                                                                                                                                                                                                                                                                                                                                                                                                                                                                                                                                                                                                                                                                                                                                                                                                                                                                                                                                                                                                                                                                                                                                                                                                                                                                                                                                                                        |            |         |               |            |         |           |            |                  |  |  |               |  |  |                  |  |            |                  |               |  |               |  |  |                 |  |            |                  |               |  |               |  |  |                 |  |            |                  |           |  |               |  |  |                  |  |  |                |   |            |            |  |            |            |               |            |            |               |            |            |               |
|                                                                                                                                               | -10 or more: 4%                                                                                                                                                                                                                                                                                                                                                                                                                                                                                                                                                                                                                                                                                                                                                                                                                                                                                                                                                                                                                                                                                                                                                                                                                                                                                                                                                                                                                    |                                                                                                                                                                                                                                                                                                                                                                                                                                                                                                                                                                                                                                                                                                                                                                                                                                                                                                                                                                                                                                                                                                                                                                                                                                                                                                                                                                                                                                                                                                                                                                                                                                        |                                                                                                                                                                                                                                                                                                                                                                                                                                                                                                                                                                                                                                                                                                                                                                                                                                                                                                                                                                                                                                                                                                                                                                                                                                                                                                                                                                                                                                                                                                                                                                                                                                                                                                                                                                                                                                                                                                                                                                                                                                                                                                                                                                                                                                                                                                                                                                                                                                                        |            |         |               |            |         |           |            |                  |  |  |               |  |  |                  |  |            |                  |               |  |               |  |  |                 |  |            |                  |               |  |               |  |  |                 |  |            |                  |           |  |               |  |  |                  |  |  |                |   |            |            |  |            |            |               |            |            |               |            |            |               |
| <b>RDL</b>                                                                                                                                    | +10 or more: 47%                                                                                                                                                                                                                                                                                                                                                                                                                                                                                                                                                                                                                                                                                                                                                                                                                                                                                                                                                                                                                                                                                                                                                                                                                                                                                                                                                                                                                   | <0.001 vs CPL                                                                                                                                                                                                                                                                                                                                                                                                                                                                                                                                                                                                                                                                                                                                                                                                                                                                                                                                                                                                                                                                                                                                                                                                                                                                                                                                                                                                                                                                                                                                                                                                                          |                                                                                                                                                                                                                                                                                                                                                                                                                                                                                                                                                                                                                                                                                                                                                                                                                                                                                                                                                                                                                                                                                                                                                                                                                                                                                                                                                                                                                                                                                                                                                                                                                                                                                                                                                                                                                                                                                                                                                                                                                                                                                                                                                                                                                                                                                                                                                                                                                                                        |            |         |               |            |         |           |            |                  |  |  |               |  |  |                  |  |            |                  |               |  |               |  |  |                 |  |            |                  |               |  |               |  |  |                 |  |            |                  |           |  |               |  |  |                  |  |  |                |   |            |            |  |            |            |               |            |            |               |            |            |               |
|                                                                                                                                               | +9 to -9: 51%                                                                                                                                                                                                                                                                                                                                                                                                                                                                                                                                                                                                                                                                                                                                                                                                                                                                                                                                                                                                                                                                                                                                                                                                                                                                                                                                                                                                                      |                                                                                                                                                                                                                                                                                                                                                                                                                                                                                                                                                                                                                                                                                                                                                                                                                                                                                                                                                                                                                                                                                                                                                                                                                                                                                                                                                                                                                                                                                                                                                                                                                                        |                                                                                                                                                                                                                                                                                                                                                                                                                                                                                                                                                                                                                                                                                                                                                                                                                                                                                                                                                                                                                                                                                                                                                                                                                                                                                                                                                                                                                                                                                                                                                                                                                                                                                                                                                                                                                                                                                                                                                                                                                                                                                                                                                                                                                                                                                                                                                                                                                                                        |            |         |               |            |         |           |            |                  |  |  |               |  |  |                  |  |            |                  |               |  |               |  |  |                 |  |            |                  |               |  |               |  |  |                 |  |            |                  |           |  |               |  |  |                  |  |  |                |   |            |            |  |            |            |               |            |            |               |            |            |               |
|                                                                                                                                               | -10 or more: 3%                                                                                                                                                                                                                                                                                                                                                                                                                                                                                                                                                                                                                                                                                                                                                                                                                                                                                                                                                                                                                                                                                                                                                                                                                                                                                                                                                                                                                    |                                                                                                                                                                                                                                                                                                                                                                                                                                                                                                                                                                                                                                                                                                                                                                                                                                                                                                                                                                                                                                                                                                                                                                                                                                                                                                                                                                                                                                                                                                                                                                                                                                        |                                                                                                                                                                                                                                                                                                                                                                                                                                                                                                                                                                                                                                                                                                                                                                                                                                                                                                                                                                                                                                                                                                                                                                                                                                                                                                                                                                                                                                                                                                                                                                                                                                                                                                                                                                                                                                                                                                                                                                                                                                                                                                                                                                                                                                                                                                                                                                                                                                                        |            |         |               |            |         |           |            |                  |  |  |               |  |  |                  |  |            |                  |               |  |               |  |  |                 |  |            |                  |               |  |               |  |  |                 |  |            |                  |           |  |               |  |  |                  |  |  |                |   |            |            |  |            |            |               |            |            |               |            |            |               |
| <b>TPL</b>                                                                                                                                    | +10 or more: 33%                                                                                                                                                                                                                                                                                                                                                                                                                                                                                                                                                                                                                                                                                                                                                                                                                                                                                                                                                                                                                                                                                                                                                                                                                                                                                                                                                                                                                   | NS vs CPL                                                                                                                                                                                                                                                                                                                                                                                                                                                                                                                                                                                                                                                                                                                                                                                                                                                                                                                                                                                                                                                                                                                                                                                                                                                                                                                                                                                                                                                                                                                                                                                                                              |                                                                                                                                                                                                                                                                                                                                                                                                                                                                                                                                                                                                                                                                                                                                                                                                                                                                                                                                                                                                                                                                                                                                                                                                                                                                                                                                                                                                                                                                                                                                                                                                                                                                                                                                                                                                                                                                                                                                                                                                                                                                                                                                                                                                                                                                                                                                                                                                                                                        |            |         |               |            |         |           |            |                  |  |  |               |  |  |                  |  |            |                  |               |  |               |  |  |                 |  |            |                  |               |  |               |  |  |                 |  |            |                  |           |  |               |  |  |                  |  |  |                |   |            |            |  |            |            |               |            |            |               |            |            |               |
|                                                                                                                                               | +9 to -9: 52%                                                                                                                                                                                                                                                                                                                                                                                                                                                                                                                                                                                                                                                                                                                                                                                                                                                                                                                                                                                                                                                                                                                                                                                                                                                                                                                                                                                                                      |                                                                                                                                                                                                                                                                                                                                                                                                                                                                                                                                                                                                                                                                                                                                                                                                                                                                                                                                                                                                                                                                                                                                                                                                                                                                                                                                                                                                                                                                                                                                                                                                                                        |                                                                                                                                                                                                                                                                                                                                                                                                                                                                                                                                                                                                                                                                                                                                                                                                                                                                                                                                                                                                                                                                                                                                                                                                                                                                                                                                                                                                                                                                                                                                                                                                                                                                                                                                                                                                                                                                                                                                                                                                                                                                                                                                                                                                                                                                                                                                                                                                                                                        |            |         |               |            |         |           |            |                  |  |  |               |  |  |                  |  |            |                  |               |  |               |  |  |                 |  |            |                  |               |  |               |  |  |                 |  |            |                  |           |  |               |  |  |                  |  |  |                |   |            |            |  |            |            |               |            |            |               |            |            |               |
|                                                                                                                                               | -10 or more: 14%                                                                                                                                                                                                                                                                                                                                                                                                                                                                                                                                                                                                                                                                                                                                                                                                                                                                                                                                                                                                                                                                                                                                                                                                                                                                                                                                                                                                                   |                                                                                                                                                                                                                                                                                                                                                                                                                                                                                                                                                                                                                                                                                                                                                                                                                                                                                                                                                                                                                                                                                                                                                                                                                                                                                                                                                                                                                                                                                                                                                                                                                                        |                                                                                                                                                                                                                                                                                                                                                                                                                                                                                                                                                                                                                                                                                                                                                                                                                                                                                                                                                                                                                                                                                                                                                                                                                                                                                                                                                                                                                                                                                                                                                                                                                                                                                                                                                                                                                                                                                                                                                                                                                                                                                                                                                                                                                                                                                                                                                                                                                                                        |            |         |               |            |         |           |            |                  |  |  |               |  |  |                  |  |            |                  |               |  |               |  |  |                 |  |            |                  |               |  |               |  |  |                 |  |            |                  |           |  |               |  |  |                  |  |  |                |   |            |            |  |            |            |               |            |            |               |            |            |               |
|                                                                                                                                               | CMT ( $\mu$ m)                                                                                                                                                                                                                                                                                                                                                                                                                                                                                                                                                                                                                                                                                                                                                                                                                                                                                                                                                                                                                                                                                                                                                                                                                                                                                                                                                                                                                     | p                                                                                                                                                                                                                                                                                                                                                                                                                                                                                                                                                                                                                                                                                                                                                                                                                                                                                                                                                                                                                                                                                                                                                                                                                                                                                                                                                                                                                                                                                                                                                                                                                                      |                                                                                                                                                                                                                                                                                                                                                                                                                                                                                                                                                                                                                                                                                                                                                                                                                                                                                                                                                                                                                                                                                                                                                                                                                                                                                                                                                                                                                                                                                                                                                                                                                                                                                                                                                                                                                                                                                                                                                                                                                                                                                                                                                                                                                                                                                                                                                                                                                                                        |            |         |               |            |         |           |            |                  |  |  |               |  |  |                  |  |            |                  |               |  |               |  |  |                 |  |            |                  |               |  |               |  |  |                 |  |            |                  |           |  |               |  |  |                  |  |  |                |   |            |            |  |            |            |               |            |            |               |            |            |               |
| <b>CPL</b>                                                                                                                                    | -102 SD151                                                                                                                                                                                                                                                                                                                                                                                                                                                                                                                                                                                                                                                                                                                                                                                                                                                                                                                                                                                                                                                                                                                                                                                                                                                                                                                                                                                                                         |                                                                                                                                                                                                                                                                                                                                                                                                                                                                                                                                                                                                                                                                                                                                                                                                                                                                                                                                                                                                                                                                                                                                                                                                                                                                                                                                                                                                                                                                                                                                                                                                                                        |                                                                                                                                                                                                                                                                                                                                                                                                                                                                                                                                                                                                                                                                                                                                                                                                                                                                                                                                                                                                                                                                                                                                                                                                                                                                                                                                                                                                                                                                                                                                                                                                                                                                                                                                                                                                                                                                                                                                                                                                                                                                                                                                                                                                                                                                                                                                                                                                                                                        |            |         |               |            |         |           |            |                  |  |  |               |  |  |                  |  |            |                  |               |  |               |  |  |                 |  |            |                  |               |  |               |  |  |                 |  |            |                  |           |  |               |  |  |                  |  |  |                |   |            |            |  |            |            |               |            |            |               |            |            |               |
| <b>RPL</b>                                                                                                                                    | -131 SD129                                                                                                                                                                                                                                                                                                                                                                                                                                                                                                                                                                                                                                                                                                                                                                                                                                                                                                                                                                                                                                                                                                                                                                                                                                                                                                                                                                                                                         | <0.001 vs CPL                                                                                                                                                                                                                                                                                                                                                                                                                                                                                                                                                                                                                                                                                                                                                                                                                                                                                                                                                                                                                                                                                                                                                                                                                                                                                                                                                                                                                                                                                                                                                                                                                          |                                                                                                                                                                                                                                                                                                                                                                                                                                                                                                                                                                                                                                                                                                                                                                                                                                                                                                                                                                                                                                                                                                                                                                                                                                                                                                                                                                                                                                                                                                                                                                                                                                                                                                                                                                                                                                                                                                                                                                                                                                                                                                                                                                                                                                                                                                                                                                                                                                                        |            |         |               |            |         |           |            |                  |  |  |               |  |  |                  |  |            |                  |               |  |               |  |  |                 |  |            |                  |               |  |               |  |  |                 |  |            |                  |           |  |               |  |  |                  |  |  |                |   |            |            |  |            |            |               |            |            |               |            |            |               |
| <b>RDL</b>                                                                                                                                    | -137 SD136                                                                                                                                                                                                                                                                                                                                                                                                                                                                                                                                                                                                                                                                                                                                                                                                                                                                                                                                                                                                                                                                                                                                                                                                                                                                                                                                                                                                                         | <0.001 vs CPL                                                                                                                                                                                                                                                                                                                                                                                                                                                                                                                                                                                                                                                                                                                                                                                                                                                                                                                                                                                                                                                                                                                                                                                                                                                                                                                                                                                                                                                                                                                                                                                                                          |                                                                                                                                                                                                                                                                                                                                                                                                                                                                                                                                                                                                                                                                                                                                                                                                                                                                                                                                                                                                                                                                                                                                                                                                                                                                                                                                                                                                                                                                                                                                                                                                                                                                                                                                                                                                                                                                                                                                                                                                                                                                                                                                                                                                                                                                                                                                                                                                                                                        |            |         |               |            |         |           |            |                  |  |  |               |  |  |                  |  |            |                  |               |  |               |  |  |                 |  |            |                  |               |  |               |  |  |                 |  |            |                  |           |  |               |  |  |                  |  |  |                |   |            |            |  |            |            |               |            |            |               |            |            |               |
| <b>TPL</b>                                                                                                                                    | -127 SD140                                                                                                                                                                                                                                                                                                                                                                                                                                                                                                                                                                                                                                                                                                                                                                                                                                                                                                                                                                                                                                                                                                                                                                                                                                                                                                                                                                                                                         | <0.001 vs CPL                                                                                                                                                                                                                                                                                                                                                                                                                                                                                                                                                                                                                                                                                                                                                                                                                                                                                                                                                                                                                                                                                                                                                                                                                                                                                                                                                                                                                                                                                                                                                                                                                          |                                                                                                                                                                                                                                                                                                                                                                                                                                                                                                                                                                                                                                                                                                                                                                                                                                                                                                                                                                                                                                                                                                                                                                                                                                                                                                                                                                                                                                                                                                                                                                                                                                                                                                                                                                                                                                                                                                                                                                                                                                                                                                                                                                                                                                                                                                                                                                                                                                                        |            |         |               |            |         |           |            |                  |  |  |               |  |  |                  |  |            |                  |               |  |               |  |  |                 |  |            |                  |               |  |               |  |  |                 |  |            |                  |           |  |               |  |  |                  |  |  |                |   |            |            |  |            |            |               |            |            |               |            |            |               |

1  
2  
3  
4  
5  
6  
7  
8  
9  
10  
11  
12  
13  
14  
15  
16  
17  
18  
19  
20  
21  
22  
23  
24  
25  
26  
27  
28  
29  
30  
31  
32  
33  
34  
35  
36  
37  
38  
39  
40  
41  
42  
43  
44  
45  
46  
47  
48  
49

| Study                                                                                                                                                                             | Participants and baseline values                                                                                                                                                                                                                                                              | Intervention                                                                                                                                                                                                                                                                                         | Outcome (change from baseline at study end)                                                                                                                                                                                                                                                                                                                                                                                                                                                                                                                                                                                                                                                                                                                                                                                                                                                                                                                                                                                                                                                                                                                                                                                                                                                                                                                                                                                                                                                                                                                                                                                                                                                                                                                                            |  |                                            |   |                    |         |                                      |                    |         |                                                         |                    |         |                                      |                    |         |           |                                |  |  |            |                  |  |  |               |  |  |                  |  |            |                  |           |  |               |  |  |                 |  |            |                  |             |  |               |  |  |                 |  |            |                  |           |  |               |  |  |                  |  |            |  |  |  |          |   |            |            |  |            |            |              |            |            |             |            |            |           |
|-----------------------------------------------------------------------------------------------------------------------------------------------------------------------------------|-----------------------------------------------------------------------------------------------------------------------------------------------------------------------------------------------------------------------------------------------------------------------------------------------|------------------------------------------------------------------------------------------------------------------------------------------------------------------------------------------------------------------------------------------------------------------------------------------------------|----------------------------------------------------------------------------------------------------------------------------------------------------------------------------------------------------------------------------------------------------------------------------------------------------------------------------------------------------------------------------------------------------------------------------------------------------------------------------------------------------------------------------------------------------------------------------------------------------------------------------------------------------------------------------------------------------------------------------------------------------------------------------------------------------------------------------------------------------------------------------------------------------------------------------------------------------------------------------------------------------------------------------------------------------------------------------------------------------------------------------------------------------------------------------------------------------------------------------------------------------------------------------------------------------------------------------------------------------------------------------------------------------------------------------------------------------------------------------------------------------------------------------------------------------------------------------------------------------------------------------------------------------------------------------------------------------------------------------------------------------------------------------------------|--|--------------------------------------------|---|--------------------|---------|--------------------------------------|--------------------|---------|---------------------------------------------------------|--------------------|---------|--------------------------------------|--------------------|---------|-----------|--------------------------------|--|--|------------|------------------|--|--|---------------|--|--|------------------|--|------------|------------------|-----------|--|---------------|--|--|-----------------|--|------------|------------------|-------------|--|---------------|--|--|-----------------|--|------------|------------------|-----------|--|---------------|--|--|------------------|--|------------|--|--|--|----------|---|------------|------------|--|------------|------------|--------------|------------|------------|-------------|------------|------------|-----------|
|                                                                                                                                                                                   |                                                                                                                                                                                                                                                                                               | (Elman 2011): median injections 2 in RPL group, 3 in RDL group; in TPL group 68% of eyes received at least 1 injection; at least one focal/grid laser sessions between 1 and 2 years: 51% CPL, 40% RPL, 29% RDL, 52% TPL<br><b>Laser</b> Modified ETDRS protocol as used in prior DRCR.net protocols | <table border="1"> <thead> <tr> <th></th> <th>BCVA (letters)</th> <th>p</th> </tr> </thead> <tbody> <tr> <td><i>CPL (n=211)</i></td> <td>+3 SD15</td> <td></td> </tr> <tr> <td><i>RPL (n=136)</i></td> <td>+7 SD13</td> <td>0.03 vs CPL</td> </tr> <tr> <td><i>RDL (n=139)</i></td> <td>+9 SD14</td> <td>&lt;0.001 vs CPL</td> </tr> <tr> <td><i>TPL (n=142)</i></td> <td>+2 SD19</td> <td>NS vs CPL</td> </tr> </tbody> </table><br><table border="1"> <thead> <tr> <th colspan="3">BCVA gain categories (letters)</th> </tr> </thead> <tbody> <tr> <td><i>CPL</i></td> <td>+10 or more: 36%</td> <td></td> </tr> <tr> <td></td> <td>+9 to -9: 52%</td> <td></td> </tr> <tr> <td></td> <td>-10 or more: 13%</td> <td></td> </tr> <tr> <td><i>RPL</i></td> <td>+10 or more: 44%</td> <td>NS vs CPL</td> </tr> <tr> <td></td> <td>+9 to -9: 49%</td> <td></td> </tr> <tr> <td></td> <td>-10 or more: 7%</td> <td></td> </tr> <tr> <td><i>RDL</i></td> <td>+10 or more: 49%</td> <td>0.01 vs CPL</td> </tr> <tr> <td></td> <td>+9 to -9: 48%</td> <td></td> </tr> <tr> <td></td> <td>-10 or more: 3%</td> <td></td> </tr> <tr> <td><i>TPL</i></td> <td>+10 or more: 41%</td> <td>NS vs CPL</td> </tr> <tr> <td></td> <td>+9 to -9: 40%</td> <td></td> </tr> <tr> <td></td> <td>-10 or more: 19%</td> <td></td> </tr> </tbody> </table><br><table border="1"> <thead> <tr> <th colspan="3">CMT (OCT):</th> </tr> <tr> <th></th> <th>CMT (µm)</th> <th>p</th> </tr> </thead> <tbody> <tr> <td><i>CPL</i></td> <td>-138 SD149</td> <td></td> </tr> <tr> <td><i>RPL</i></td> <td>-141 SD155</td> <td>0.003 vs CPL</td> </tr> <tr> <td><i>RDL</i></td> <td>-150 SD143</td> <td>0.01 vs CPL</td> </tr> <tr> <td><i>TPL</i></td> <td>-107 SD145</td> <td>NS vs CPL</td> </tr> </tbody> </table> |  | BCVA (letters)                             | p | <i>CPL (n=211)</i> | +3 SD15 |                                      | <i>RPL (n=136)</i> | +7 SD13 | 0.03 vs CPL                                             | <i>RDL (n=139)</i> | +9 SD14 | <0.001 vs CPL                        | <i>TPL (n=142)</i> | +2 SD19 | NS vs CPL | BCVA gain categories (letters) |  |  | <i>CPL</i> | +10 or more: 36% |  |  | +9 to -9: 52% |  |  | -10 or more: 13% |  | <i>RPL</i> | +10 or more: 44% | NS vs CPL |  | +9 to -9: 49% |  |  | -10 or more: 7% |  | <i>RDL</i> | +10 or more: 49% | 0.01 vs CPL |  | +9 to -9: 48% |  |  | -10 or more: 3% |  | <i>TPL</i> | +10 or more: 41% | NS vs CPL |  | +9 to -9: 40% |  |  | -10 or more: 19% |  | CMT (OCT): |  |  |  | CMT (µm) | p | <i>CPL</i> | -138 SD149 |  | <i>RPL</i> | -141 SD155 | 0.003 vs CPL | <i>RDL</i> | -150 SD143 | 0.01 vs CPL | <i>TPL</i> | -107 SD145 | NS vs CPL |
|                                                                                                                                                                                   | BCVA (letters)                                                                                                                                                                                                                                                                                | p                                                                                                                                                                                                                                                                                                    |                                                                                                                                                                                                                                                                                                                                                                                                                                                                                                                                                                                                                                                                                                                                                                                                                                                                                                                                                                                                                                                                                                                                                                                                                                                                                                                                                                                                                                                                                                                                                                                                                                                                                                                                                                                        |  |                                            |   |                    |         |                                      |                    |         |                                                         |                    |         |                                      |                    |         |           |                                |  |  |            |                  |  |  |               |  |  |                  |  |            |                  |           |  |               |  |  |                 |  |            |                  |             |  |               |  |  |                 |  |            |                  |           |  |               |  |  |                  |  |            |  |  |  |          |   |            |            |  |            |            |              |            |            |             |            |            |           |
| <i>CPL (n=211)</i>                                                                                                                                                                | +3 SD15                                                                                                                                                                                                                                                                                       |                                                                                                                                                                                                                                                                                                      |                                                                                                                                                                                                                                                                                                                                                                                                                                                                                                                                                                                                                                                                                                                                                                                                                                                                                                                                                                                                                                                                                                                                                                                                                                                                                                                                                                                                                                                                                                                                                                                                                                                                                                                                                                                        |  |                                            |   |                    |         |                                      |                    |         |                                                         |                    |         |                                      |                    |         |           |                                |  |  |            |                  |  |  |               |  |  |                  |  |            |                  |           |  |               |  |  |                 |  |            |                  |             |  |               |  |  |                 |  |            |                  |           |  |               |  |  |                  |  |            |  |  |  |          |   |            |            |  |            |            |              |            |            |             |            |            |           |
| <i>RPL (n=136)</i>                                                                                                                                                                | +7 SD13                                                                                                                                                                                                                                                                                       | 0.03 vs CPL                                                                                                                                                                                                                                                                                          |                                                                                                                                                                                                                                                                                                                                                                                                                                                                                                                                                                                                                                                                                                                                                                                                                                                                                                                                                                                                                                                                                                                                                                                                                                                                                                                                                                                                                                                                                                                                                                                                                                                                                                                                                                                        |  |                                            |   |                    |         |                                      |                    |         |                                                         |                    |         |                                      |                    |         |           |                                |  |  |            |                  |  |  |               |  |  |                  |  |            |                  |           |  |               |  |  |                 |  |            |                  |             |  |               |  |  |                 |  |            |                  |           |  |               |  |  |                  |  |            |  |  |  |          |   |            |            |  |            |            |              |            |            |             |            |            |           |
| <i>RDL (n=139)</i>                                                                                                                                                                | +9 SD14                                                                                                                                                                                                                                                                                       | <0.001 vs CPL                                                                                                                                                                                                                                                                                        |                                                                                                                                                                                                                                                                                                                                                                                                                                                                                                                                                                                                                                                                                                                                                                                                                                                                                                                                                                                                                                                                                                                                                                                                                                                                                                                                                                                                                                                                                                                                                                                                                                                                                                                                                                                        |  |                                            |   |                    |         |                                      |                    |         |                                                         |                    |         |                                      |                    |         |           |                                |  |  |            |                  |  |  |               |  |  |                  |  |            |                  |           |  |               |  |  |                 |  |            |                  |             |  |               |  |  |                 |  |            |                  |           |  |               |  |  |                  |  |            |  |  |  |          |   |            |            |  |            |            |              |            |            |             |            |            |           |
| <i>TPL (n=142)</i>                                                                                                                                                                | +2 SD19                                                                                                                                                                                                                                                                                       | NS vs CPL                                                                                                                                                                                                                                                                                            |                                                                                                                                                                                                                                                                                                                                                                                                                                                                                                                                                                                                                                                                                                                                                                                                                                                                                                                                                                                                                                                                                                                                                                                                                                                                                                                                                                                                                                                                                                                                                                                                                                                                                                                                                                                        |  |                                            |   |                    |         |                                      |                    |         |                                                         |                    |         |                                      |                    |         |           |                                |  |  |            |                  |  |  |               |  |  |                  |  |            |                  |           |  |               |  |  |                 |  |            |                  |             |  |               |  |  |                 |  |            |                  |           |  |               |  |  |                  |  |            |  |  |  |          |   |            |            |  |            |            |              |            |            |             |            |            |           |
| BCVA gain categories (letters)                                                                                                                                                    |                                                                                                                                                                                                                                                                                               |                                                                                                                                                                                                                                                                                                      |                                                                                                                                                                                                                                                                                                                                                                                                                                                                                                                                                                                                                                                                                                                                                                                                                                                                                                                                                                                                                                                                                                                                                                                                                                                                                                                                                                                                                                                                                                                                                                                                                                                                                                                                                                                        |  |                                            |   |                    |         |                                      |                    |         |                                                         |                    |         |                                      |                    |         |           |                                |  |  |            |                  |  |  |               |  |  |                  |  |            |                  |           |  |               |  |  |                 |  |            |                  |             |  |               |  |  |                 |  |            |                  |           |  |               |  |  |                  |  |            |  |  |  |          |   |            |            |  |            |            |              |            |            |             |            |            |           |
| <i>CPL</i>                                                                                                                                                                        | +10 or more: 36%                                                                                                                                                                                                                                                                              |                                                                                                                                                                                                                                                                                                      |                                                                                                                                                                                                                                                                                                                                                                                                                                                                                                                                                                                                                                                                                                                                                                                                                                                                                                                                                                                                                                                                                                                                                                                                                                                                                                                                                                                                                                                                                                                                                                                                                                                                                                                                                                                        |  |                                            |   |                    |         |                                      |                    |         |                                                         |                    |         |                                      |                    |         |           |                                |  |  |            |                  |  |  |               |  |  |                  |  |            |                  |           |  |               |  |  |                 |  |            |                  |             |  |               |  |  |                 |  |            |                  |           |  |               |  |  |                  |  |            |  |  |  |          |   |            |            |  |            |            |              |            |            |             |            |            |           |
|                                                                                                                                                                                   | +9 to -9: 52%                                                                                                                                                                                                                                                                                 |                                                                                                                                                                                                                                                                                                      |                                                                                                                                                                                                                                                                                                                                                                                                                                                                                                                                                                                                                                                                                                                                                                                                                                                                                                                                                                                                                                                                                                                                                                                                                                                                                                                                                                                                                                                                                                                                                                                                                                                                                                                                                                                        |  |                                            |   |                    |         |                                      |                    |         |                                                         |                    |         |                                      |                    |         |           |                                |  |  |            |                  |  |  |               |  |  |                  |  |            |                  |           |  |               |  |  |                 |  |            |                  |             |  |               |  |  |                 |  |            |                  |           |  |               |  |  |                  |  |            |  |  |  |          |   |            |            |  |            |            |              |            |            |             |            |            |           |
|                                                                                                                                                                                   | -10 or more: 13%                                                                                                                                                                                                                                                                              |                                                                                                                                                                                                                                                                                                      |                                                                                                                                                                                                                                                                                                                                                                                                                                                                                                                                                                                                                                                                                                                                                                                                                                                                                                                                                                                                                                                                                                                                                                                                                                                                                                                                                                                                                                                                                                                                                                                                                                                                                                                                                                                        |  |                                            |   |                    |         |                                      |                    |         |                                                         |                    |         |                                      |                    |         |           |                                |  |  |            |                  |  |  |               |  |  |                  |  |            |                  |           |  |               |  |  |                 |  |            |                  |             |  |               |  |  |                 |  |            |                  |           |  |               |  |  |                  |  |            |  |  |  |          |   |            |            |  |            |            |              |            |            |             |            |            |           |
| <i>RPL</i>                                                                                                                                                                        | +10 or more: 44%                                                                                                                                                                                                                                                                              | NS vs CPL                                                                                                                                                                                                                                                                                            |                                                                                                                                                                                                                                                                                                                                                                                                                                                                                                                                                                                                                                                                                                                                                                                                                                                                                                                                                                                                                                                                                                                                                                                                                                                                                                                                                                                                                                                                                                                                                                                                                                                                                                                                                                                        |  |                                            |   |                    |         |                                      |                    |         |                                                         |                    |         |                                      |                    |         |           |                                |  |  |            |                  |  |  |               |  |  |                  |  |            |                  |           |  |               |  |  |                 |  |            |                  |             |  |               |  |  |                 |  |            |                  |           |  |               |  |  |                  |  |            |  |  |  |          |   |            |            |  |            |            |              |            |            |             |            |            |           |
|                                                                                                                                                                                   | +9 to -9: 49%                                                                                                                                                                                                                                                                                 |                                                                                                                                                                                                                                                                                                      |                                                                                                                                                                                                                                                                                                                                                                                                                                                                                                                                                                                                                                                                                                                                                                                                                                                                                                                                                                                                                                                                                                                                                                                                                                                                                                                                                                                                                                                                                                                                                                                                                                                                                                                                                                                        |  |                                            |   |                    |         |                                      |                    |         |                                                         |                    |         |                                      |                    |         |           |                                |  |  |            |                  |  |  |               |  |  |                  |  |            |                  |           |  |               |  |  |                 |  |            |                  |             |  |               |  |  |                 |  |            |                  |           |  |               |  |  |                  |  |            |  |  |  |          |   |            |            |  |            |            |              |            |            |             |            |            |           |
|                                                                                                                                                                                   | -10 or more: 7%                                                                                                                                                                                                                                                                               |                                                                                                                                                                                                                                                                                                      |                                                                                                                                                                                                                                                                                                                                                                                                                                                                                                                                                                                                                                                                                                                                                                                                                                                                                                                                                                                                                                                                                                                                                                                                                                                                                                                                                                                                                                                                                                                                                                                                                                                                                                                                                                                        |  |                                            |   |                    |         |                                      |                    |         |                                                         |                    |         |                                      |                    |         |           |                                |  |  |            |                  |  |  |               |  |  |                  |  |            |                  |           |  |               |  |  |                 |  |            |                  |             |  |               |  |  |                 |  |            |                  |           |  |               |  |  |                  |  |            |  |  |  |          |   |            |            |  |            |            |              |            |            |             |            |            |           |
| <i>RDL</i>                                                                                                                                                                        | +10 or more: 49%                                                                                                                                                                                                                                                                              | 0.01 vs CPL                                                                                                                                                                                                                                                                                          |                                                                                                                                                                                                                                                                                                                                                                                                                                                                                                                                                                                                                                                                                                                                                                                                                                                                                                                                                                                                                                                                                                                                                                                                                                                                                                                                                                                                                                                                                                                                                                                                                                                                                                                                                                                        |  |                                            |   |                    |         |                                      |                    |         |                                                         |                    |         |                                      |                    |         |           |                                |  |  |            |                  |  |  |               |  |  |                  |  |            |                  |           |  |               |  |  |                 |  |            |                  |             |  |               |  |  |                 |  |            |                  |           |  |               |  |  |                  |  |            |  |  |  |          |   |            |            |  |            |            |              |            |            |             |            |            |           |
|                                                                                                                                                                                   | +9 to -9: 48%                                                                                                                                                                                                                                                                                 |                                                                                                                                                                                                                                                                                                      |                                                                                                                                                                                                                                                                                                                                                                                                                                                                                                                                                                                                                                                                                                                                                                                                                                                                                                                                                                                                                                                                                                                                                                                                                                                                                                                                                                                                                                                                                                                                                                                                                                                                                                                                                                                        |  |                                            |   |                    |         |                                      |                    |         |                                                         |                    |         |                                      |                    |         |           |                                |  |  |            |                  |  |  |               |  |  |                  |  |            |                  |           |  |               |  |  |                 |  |            |                  |             |  |               |  |  |                 |  |            |                  |           |  |               |  |  |                  |  |            |  |  |  |          |   |            |            |  |            |            |              |            |            |             |            |            |           |
|                                                                                                                                                                                   | -10 or more: 3%                                                                                                                                                                                                                                                                               |                                                                                                                                                                                                                                                                                                      |                                                                                                                                                                                                                                                                                                                                                                                                                                                                                                                                                                                                                                                                                                                                                                                                                                                                                                                                                                                                                                                                                                                                                                                                                                                                                                                                                                                                                                                                                                                                                                                                                                                                                                                                                                                        |  |                                            |   |                    |         |                                      |                    |         |                                                         |                    |         |                                      |                    |         |           |                                |  |  |            |                  |  |  |               |  |  |                  |  |            |                  |           |  |               |  |  |                 |  |            |                  |             |  |               |  |  |                 |  |            |                  |           |  |               |  |  |                  |  |            |  |  |  |          |   |            |            |  |            |            |              |            |            |             |            |            |           |
| <i>TPL</i>                                                                                                                                                                        | +10 or more: 41%                                                                                                                                                                                                                                                                              | NS vs CPL                                                                                                                                                                                                                                                                                            |                                                                                                                                                                                                                                                                                                                                                                                                                                                                                                                                                                                                                                                                                                                                                                                                                                                                                                                                                                                                                                                                                                                                                                                                                                                                                                                                                                                                                                                                                                                                                                                                                                                                                                                                                                                        |  |                                            |   |                    |         |                                      |                    |         |                                                         |                    |         |                                      |                    |         |           |                                |  |  |            |                  |  |  |               |  |  |                  |  |            |                  |           |  |               |  |  |                 |  |            |                  |             |  |               |  |  |                 |  |            |                  |           |  |               |  |  |                  |  |            |  |  |  |          |   |            |            |  |            |            |              |            |            |             |            |            |           |
|                                                                                                                                                                                   | +9 to -9: 40%                                                                                                                                                                                                                                                                                 |                                                                                                                                                                                                                                                                                                      |                                                                                                                                                                                                                                                                                                                                                                                                                                                                                                                                                                                                                                                                                                                                                                                                                                                                                                                                                                                                                                                                                                                                                                                                                                                                                                                                                                                                                                                                                                                                                                                                                                                                                                                                                                                        |  |                                            |   |                    |         |                                      |                    |         |                                                         |                    |         |                                      |                    |         |           |                                |  |  |            |                  |  |  |               |  |  |                  |  |            |                  |           |  |               |  |  |                 |  |            |                  |             |  |               |  |  |                 |  |            |                  |           |  |               |  |  |                  |  |            |  |  |  |          |   |            |            |  |            |            |              |            |            |             |            |            |           |
|                                                                                                                                                                                   | -10 or more: 19%                                                                                                                                                                                                                                                                              |                                                                                                                                                                                                                                                                                                      |                                                                                                                                                                                                                                                                                                                                                                                                                                                                                                                                                                                                                                                                                                                                                                                                                                                                                                                                                                                                                                                                                                                                                                                                                                                                                                                                                                                                                                                                                                                                                                                                                                                                                                                                                                                        |  |                                            |   |                    |         |                                      |                    |         |                                                         |                    |         |                                      |                    |         |           |                                |  |  |            |                  |  |  |               |  |  |                  |  |            |                  |           |  |               |  |  |                 |  |            |                  |             |  |               |  |  |                 |  |            |                  |           |  |               |  |  |                  |  |            |  |  |  |          |   |            |            |  |            |            |              |            |            |             |            |            |           |
| CMT (OCT):                                                                                                                                                                        |                                                                                                                                                                                                                                                                                               |                                                                                                                                                                                                                                                                                                      |                                                                                                                                                                                                                                                                                                                                                                                                                                                                                                                                                                                                                                                                                                                                                                                                                                                                                                                                                                                                                                                                                                                                                                                                                                                                                                                                                                                                                                                                                                                                                                                                                                                                                                                                                                                        |  |                                            |   |                    |         |                                      |                    |         |                                                         |                    |         |                                      |                    |         |           |                                |  |  |            |                  |  |  |               |  |  |                  |  |            |                  |           |  |               |  |  |                 |  |            |                  |             |  |               |  |  |                 |  |            |                  |           |  |               |  |  |                  |  |            |  |  |  |          |   |            |            |  |            |            |              |            |            |             |            |            |           |
|                                                                                                                                                                                   | CMT (µm)                                                                                                                                                                                                                                                                                      | p                                                                                                                                                                                                                                                                                                    |                                                                                                                                                                                                                                                                                                                                                                                                                                                                                                                                                                                                                                                                                                                                                                                                                                                                                                                                                                                                                                                                                                                                                                                                                                                                                                                                                                                                                                                                                                                                                                                                                                                                                                                                                                                        |  |                                            |   |                    |         |                                      |                    |         |                                                         |                    |         |                                      |                    |         |           |                                |  |  |            |                  |  |  |               |  |  |                  |  |            |                  |           |  |               |  |  |                 |  |            |                  |             |  |               |  |  |                 |  |            |                  |           |  |               |  |  |                  |  |            |  |  |  |          |   |            |            |  |            |            |              |            |            |             |            |            |           |
| <i>CPL</i>                                                                                                                                                                        | -138 SD149                                                                                                                                                                                                                                                                                    |                                                                                                                                                                                                                                                                                                      |                                                                                                                                                                                                                                                                                                                                                                                                                                                                                                                                                                                                                                                                                                                                                                                                                                                                                                                                                                                                                                                                                                                                                                                                                                                                                                                                                                                                                                                                                                                                                                                                                                                                                                                                                                                        |  |                                            |   |                    |         |                                      |                    |         |                                                         |                    |         |                                      |                    |         |           |                                |  |  |            |                  |  |  |               |  |  |                  |  |            |                  |           |  |               |  |  |                 |  |            |                  |             |  |               |  |  |                 |  |            |                  |           |  |               |  |  |                  |  |            |  |  |  |          |   |            |            |  |            |            |              |            |            |             |            |            |           |
| <i>RPL</i>                                                                                                                                                                        | -141 SD155                                                                                                                                                                                                                                                                                    | 0.003 vs CPL                                                                                                                                                                                                                                                                                         |                                                                                                                                                                                                                                                                                                                                                                                                                                                                                                                                                                                                                                                                                                                                                                                                                                                                                                                                                                                                                                                                                                                                                                                                                                                                                                                                                                                                                                                                                                                                                                                                                                                                                                                                                                                        |  |                                            |   |                    |         |                                      |                    |         |                                                         |                    |         |                                      |                    |         |           |                                |  |  |            |                  |  |  |               |  |  |                  |  |            |                  |           |  |               |  |  |                 |  |            |                  |             |  |               |  |  |                 |  |            |                  |           |  |               |  |  |                  |  |            |  |  |  |          |   |            |            |  |            |            |              |            |            |             |            |            |           |
| <i>RDL</i>                                                                                                                                                                        | -150 SD143                                                                                                                                                                                                                                                                                    | 0.01 vs CPL                                                                                                                                                                                                                                                                                          |                                                                                                                                                                                                                                                                                                                                                                                                                                                                                                                                                                                                                                                                                                                                                                                                                                                                                                                                                                                                                                                                                                                                                                                                                                                                                                                                                                                                                                                                                                                                                                                                                                                                                                                                                                                        |  |                                            |   |                    |         |                                      |                    |         |                                                         |                    |         |                                      |                    |         |           |                                |  |  |            |                  |  |  |               |  |  |                  |  |            |                  |           |  |               |  |  |                 |  |            |                  |             |  |               |  |  |                 |  |            |                  |           |  |               |  |  |                  |  |            |  |  |  |          |   |            |            |  |            |            |              |            |            |             |            |            |           |
| <i>TPL</i>                                                                                                                                                                        | -107 SD145                                                                                                                                                                                                                                                                                    | NS vs CPL                                                                                                                                                                                                                                                                                            |                                                                                                                                                                                                                                                                                                                                                                                                                                                                                                                                                                                                                                                                                                                                                                                                                                                                                                                                                                                                                                                                                                                                                                                                                                                                                                                                                                                                                                                                                                                                                                                                                                                                                                                                                                                        |  |                                            |   |                    |         |                                      |                    |         |                                                         |                    |         |                                      |                    |         |           |                                |  |  |            |                  |  |  |               |  |  |                  |  |            |                  |           |  |               |  |  |                 |  |            |                  |             |  |               |  |  |                 |  |            |                  |           |  |               |  |  |                  |  |            |  |  |  |          |   |            |            |  |            |            |              |            |            |             |            |            |           |
| <b>Jorge 201 Brazil</b> [51]<br><br><b>Design:</b> Prospective RCT<br><b>Follow-up:</b> 24 and 48 weeks [To date, 73% and 56% of patients completed 24 and 48 weeks respectively] | N: 63 eyes of 47 patients<br><b>Inclusion criteria:</b> Refractory center-involving DMO<br><b>Exclusion criteria:</b> NR<br><b>Age:</b> NR<br><b>Sex:</b> NR<br><b>Diabetes type:</b> NR<br><b>HbA1c:</b> NR<br><b>Baseline VA:</b> NR<br><b>Baseline CMT:</b> NR<br><b>Comorbidities:</b> NR | <b>Group 1 (IVB 1.5 mg, n=NR):</b> injections at baseline and monthly if CSFT (central subfield thickness) measured by SDOCT (spectral domain OCT) >275 µm.<br><b>Group 2 (IVR 0.5 mg, n=NR) :</b> injections at baseline and monthly if CSFT >275 µm.                                               | At 48 weeks<br><table border="1"> <thead> <tr> <th></th> <th>Mean BCVA reduction from baseline (logMAR)</th> <th>p</th> </tr> </thead> <tbody> <tr> <td><i>IVB1.5</i></td> <td>-0.21</td> <td>vs baseline &lt;0.05 at all-time points</td> </tr> <tr> <td></td> <td></td> <td>vs IVR0.5: no significant difference at all time-points</td> </tr> <tr> <td><i>IVR0.5</i></td> <td>-0.21</td> <td>vs baseline &lt;0.05 at all time-points</td> </tr> </tbody> </table>                                                                                                                                                                                                                                                                                                                                                                                                                                                                                                                                                                                                                                                                                                                                                                                                                                                                                                                                                                                                                                                                                                                                                                                                                                                                                                                   |  | Mean BCVA reduction from baseline (logMAR) | p | <i>IVB1.5</i>      | -0.21   | vs baseline <0.05 at all-time points |                    |         | vs IVR0.5: no significant difference at all time-points | <i>IVR0.5</i>      | -0.21   | vs baseline <0.05 at all time-points |                    |         |           |                                |  |  |            |                  |  |  |               |  |  |                  |  |            |                  |           |  |               |  |  |                 |  |            |                  |             |  |               |  |  |                 |  |            |                  |           |  |               |  |  |                  |  |            |  |  |  |          |   |            |            |  |            |            |              |            |            |             |            |            |           |
|                                                                                                                                                                                   | Mean BCVA reduction from baseline (logMAR)                                                                                                                                                                                                                                                    | p                                                                                                                                                                                                                                                                                                    |                                                                                                                                                                                                                                                                                                                                                                                                                                                                                                                                                                                                                                                                                                                                                                                                                                                                                                                                                                                                                                                                                                                                                                                                                                                                                                                                                                                                                                                                                                                                                                                                                                                                                                                                                                                        |  |                                            |   |                    |         |                                      |                    |         |                                                         |                    |         |                                      |                    |         |           |                                |  |  |            |                  |  |  |               |  |  |                  |  |            |                  |           |  |               |  |  |                 |  |            |                  |             |  |               |  |  |                 |  |            |                  |           |  |               |  |  |                  |  |            |  |  |  |          |   |            |            |  |            |            |              |            |            |             |            |            |           |
| <i>IVB1.5</i>                                                                                                                                                                     | -0.21                                                                                                                                                                                                                                                                                         | vs baseline <0.05 at all-time points                                                                                                                                                                                                                                                                 |                                                                                                                                                                                                                                                                                                                                                                                                                                                                                                                                                                                                                                                                                                                                                                                                                                                                                                                                                                                                                                                                                                                                                                                                                                                                                                                                                                                                                                                                                                                                                                                                                                                                                                                                                                                        |  |                                            |   |                    |         |                                      |                    |         |                                                         |                    |         |                                      |                    |         |           |                                |  |  |            |                  |  |  |               |  |  |                  |  |            |                  |           |  |               |  |  |                 |  |            |                  |             |  |               |  |  |                 |  |            |                  |           |  |               |  |  |                  |  |            |  |  |  |          |   |            |            |  |            |            |              |            |            |             |            |            |           |
|                                                                                                                                                                                   |                                                                                                                                                                                                                                                                                               | vs IVR0.5: no significant difference at all time-points                                                                                                                                                                                                                                              |                                                                                                                                                                                                                                                                                                                                                                                                                                                                                                                                                                                                                                                                                                                                                                                                                                                                                                                                                                                                                                                                                                                                                                                                                                                                                                                                                                                                                                                                                                                                                                                                                                                                                                                                                                                        |  |                                            |   |                    |         |                                      |                    |         |                                                         |                    |         |                                      |                    |         |           |                                |  |  |            |                  |  |  |               |  |  |                  |  |            |                  |           |  |               |  |  |                 |  |            |                  |             |  |               |  |  |                 |  |            |                  |           |  |               |  |  |                  |  |            |  |  |  |          |   |            |            |  |            |            |              |            |            |             |            |            |           |
| <i>IVR0.5</i>                                                                                                                                                                     | -0.21                                                                                                                                                                                                                                                                                         | vs baseline <0.05 at all time-points                                                                                                                                                                                                                                                                 |                                                                                                                                                                                                                                                                                                                                                                                                                                                                                                                                                                                                                                                                                                                                                                                                                                                                                                                                                                                                                                                                                                                                                                                                                                                                                                                                                                                                                                                                                                                                                                                                                                                                                                                                                                                        |  |                                            |   |                    |         |                                      |                    |         |                                                         |                    |         |                                      |                    |         |           |                                |  |  |            |                  |  |  |               |  |  |                  |  |            |                  |           |  |               |  |  |                 |  |            |                  |             |  |               |  |  |                 |  |            |                  |           |  |               |  |  |                  |  |            |  |  |  |          |   |            |            |  |            |            |              |            |            |             |            |            |           |

1  
2  
3  
4  
5  
6  
7  
8  
9  
10  
11  
12  
13  
14  
15  
16  
17  
18  
19  
20  
21  
22  
23  
24  
25  
26  
27  
28  
29  
30  
31  
32  
33  
34  
35  
36  
37  
38  
39  
40  
41  
42  
43  
44  
45  
46  
47  
48  
49

| Study                                                                                                       | Participants and baseline values                                                                                                                                                                                                                                                                                                                                                                                                                                                                                                                                                                                                                                                                                                                                                                                                                                           | Intervention                                                                                                                                                                                                                                                                                                                                                                                                                                                                                                                                                                                                                 | Outcome (change from baseline at study end)                                                                                                                                                                                                                                                                                                                                                                                                                                                                                                                                                                                                                                |  |                                   |   |                |                      |                                      |               |                      |                                                                                               |       |  |                       |   |                |      |                           |            |      |            |      |
|-------------------------------------------------------------------------------------------------------------|----------------------------------------------------------------------------------------------------------------------------------------------------------------------------------------------------------------------------------------------------------------------------------------------------------------------------------------------------------------------------------------------------------------------------------------------------------------------------------------------------------------------------------------------------------------------------------------------------------------------------------------------------------------------------------------------------------------------------------------------------------------------------------------------------------------------------------------------------------------------------|------------------------------------------------------------------------------------------------------------------------------------------------------------------------------------------------------------------------------------------------------------------------------------------------------------------------------------------------------------------------------------------------------------------------------------------------------------------------------------------------------------------------------------------------------------------------------------------------------------------------------|----------------------------------------------------------------------------------------------------------------------------------------------------------------------------------------------------------------------------------------------------------------------------------------------------------------------------------------------------------------------------------------------------------------------------------------------------------------------------------------------------------------------------------------------------------------------------------------------------------------------------------------------------------------------------|--|-----------------------------------|---|----------------|----------------------|--------------------------------------|---------------|----------------------|-----------------------------------------------------------------------------------------------|-------|--|-----------------------|---|----------------|------|---------------------------|------------|------|------------|------|
|                                                                                                             |                                                                                                                                                                                                                                                                                                                                                                                                                                                                                                                                                                                                                                                                                                                                                                                                                                                                            |                                                                                                                                                                                                                                                                                                                                                                                                                                                                                                                                                                                                                              | <p>vs IVB1.5: no significant difference at all time-points</p> <hr/> <p><b>CSFT</b></p> <table border="1"> <thead> <tr> <th></th> <th>Mean CSFT reduction from baseline</th> <th>p</th> </tr> </thead> <tbody> <tr> <td><i>IVB1.5</i></td> <td>-129.6 <math>\mu\text{m}</math></td> <td>vs baseline &lt;0.05 at all-time points</td> </tr> <tr> <td><i>IVR0.5</i></td> <td>-137.9 <math>\mu\text{m}</math></td> <td>vs IVR0.5 no significant different at all-time points<br/>vs baseline &lt;0.05 at all-time points</td> </tr> </tbody> </table> <p>vs IVB1.5 no significant different at all-time points</p>                                                            |  | Mean CSFT reduction from baseline | p | <i>IVB1.5</i>  | -129.6 $\mu\text{m}$ | vs baseline <0.05 at all-time points | <i>IVR0.5</i> | -137.9 $\mu\text{m}$ | vs IVR0.5 no significant different at all-time points<br>vs baseline <0.05 at all-time points |       |  |                       |   |                |      |                           |            |      |            |      |
|                                                                                                             | Mean CSFT reduction from baseline                                                                                                                                                                                                                                                                                                                                                                                                                                                                                                                                                                                                                                                                                                                                                                                                                                          | p                                                                                                                                                                                                                                                                                                                                                                                                                                                                                                                                                                                                                            |                                                                                                                                                                                                                                                                                                                                                                                                                                                                                                                                                                                                                                                                            |  |                                   |   |                |                      |                                      |               |                      |                                                                                               |       |  |                       |   |                |      |                           |            |      |            |      |
| <i>IVB1.5</i>                                                                                               | -129.6 $\mu\text{m}$                                                                                                                                                                                                                                                                                                                                                                                                                                                                                                                                                                                                                                                                                                                                                                                                                                                       | vs baseline <0.05 at all-time points                                                                                                                                                                                                                                                                                                                                                                                                                                                                                                                                                                                         |                                                                                                                                                                                                                                                                                                                                                                                                                                                                                                                                                                                                                                                                            |  |                                   |   |                |                      |                                      |               |                      |                                                                                               |       |  |                       |   |                |      |                           |            |      |            |      |
| <i>IVR0.5</i>                                                                                               | -137.9 $\mu\text{m}$                                                                                                                                                                                                                                                                                                                                                                                                                                                                                                                                                                                                                                                                                                                                                                                                                                                       | vs IVR0.5 no significant different at all-time points<br>vs baseline <0.05 at all-time points                                                                                                                                                                                                                                                                                                                                                                                                                                                                                                                                |                                                                                                                                                                                                                                                                                                                                                                                                                                                                                                                                                                                                                                                                            |  |                                   |   |                |                      |                                      |               |                      |                                                                                               |       |  |                       |   |                |      |                           |            |      |            |      |
| <p><b>Lim 2012[55]</b><br/><b>Korea</b></p> <p><b>Design:</b> 3-arm RCT<br/><b>Follow-up:</b> 12 months</p> | <p><b>N: 111 eyes of 105 patients</b><br/><b>Inclusion criteria:</b> eyes with clinically significant DMO based on ETDRS and DMO with central macular thickness of at least 300 <math>\mu\text{m}</math> by optical coherence tomography (OCT).<br/><b>Exclusion criteria:</b> unstable medical status, including glycemic control and blood pressure; any previous treatment for DMO, including intravitreal, sub-Tenon injection or macular photocoagulation, history of vitreoretinal surgery, uncontrolled glaucoma; proliferative diabetic retinopathy with active neovascularization, previous panretinal photocoagulation, presence of vitreomacular traction, history of systemic corticosteroids within 6 months, contraindications for bevacizumab or triamcinolone acetonide.<br/><b>Age:</b> 60.4 SD 7.4 (range 48 to 70) years<br/><b>Sex:</b> 52% female</p> | <p><b>Group 1 (IVB/IVT, n=36):</b> IV injection of 1.25 mg (0.05 ml) IVB at 0 and 6 weeks and IV injection of 2 mg (0.05 ml) IVT at 0 weeks. Mean number of addition injection 1.28<br/><b>Group 2 (IVB, n=38):</b> IV injection of 1.25 mg (0.05 ml) IVB at 0 and 6 weeks. Mean number of injections 2.54.<br/><b>Group 3 (IVT, n=37):</b> IV injection of 2 mg (0.05 ml) IVT at 0 weeks. Mean number of injections 1.04</p> <p><b>Unclear if rescue laser was available</b></p> <p><b>IVB injections were repeated if CMT appeared &gt;300 <math>\mu\text{m}</math> on OCT in at least 6-weeks in all three groups</b></p> | <p>At 12 months</p> <table border="1"> <thead> <tr> <th></th> <th>BCVA (logMAR)</th> <th>p</th> </tr> </thead> <tbody> <tr> <td><i>IVB/IVT</i></td> <td>-0.15</td> <td rowspan="3">0.088<br/>(between groups)</td> </tr> <tr> <td><i>IVB</i></td> <td>-0.16</td> </tr> <tr> <td><i>IVT</i></td> <td>-0.16</td> </tr> </tbody> </table><br><table border="1"> <thead> <tr> <th></th> <th>CMT (<math>\mu\text{m}</math>)</th> <th>p</th> </tr> </thead> <tbody> <tr> <td><i>IVB/IVT</i></td> <td>-199</td> <td rowspan="3">0.132<br/>(between groups)</td> </tr> <tr> <td><i>IVB</i></td> <td>-179</td> </tr> <tr> <td><i>IVT</i></td> <td>-200</td> </tr> </tbody> </table> |  | BCVA (logMAR)                     | p | <i>IVB/IVT</i> | -0.15                | 0.088<br>(between groups)            | <i>IVB</i>    | -0.16                | <i>IVT</i>                                                                                    | -0.16 |  | CMT ( $\mu\text{m}$ ) | p | <i>IVB/IVT</i> | -199 | 0.132<br>(between groups) | <i>IVB</i> | -179 | <i>IVT</i> | -200 |
|                                                                                                             | BCVA (logMAR)                                                                                                                                                                                                                                                                                                                                                                                                                                                                                                                                                                                                                                                                                                                                                                                                                                                              | p                                                                                                                                                                                                                                                                                                                                                                                                                                                                                                                                                                                                                            |                                                                                                                                                                                                                                                                                                                                                                                                                                                                                                                                                                                                                                                                            |  |                                   |   |                |                      |                                      |               |                      |                                                                                               |       |  |                       |   |                |      |                           |            |      |            |      |
| <i>IVB/IVT</i>                                                                                              | -0.15                                                                                                                                                                                                                                                                                                                                                                                                                                                                                                                                                                                                                                                                                                                                                                                                                                                                      | 0.088<br>(between groups)                                                                                                                                                                                                                                                                                                                                                                                                                                                                                                                                                                                                    |                                                                                                                                                                                                                                                                                                                                                                                                                                                                                                                                                                                                                                                                            |  |                                   |   |                |                      |                                      |               |                      |                                                                                               |       |  |                       |   |                |      |                           |            |      |            |      |
| <i>IVB</i>                                                                                                  | -0.16                                                                                                                                                                                                                                                                                                                                                                                                                                                                                                                                                                                                                                                                                                                                                                                                                                                                      |                                                                                                                                                                                                                                                                                                                                                                                                                                                                                                                                                                                                                              |                                                                                                                                                                                                                                                                                                                                                                                                                                                                                                                                                                                                                                                                            |  |                                   |   |                |                      |                                      |               |                      |                                                                                               |       |  |                       |   |                |      |                           |            |      |            |      |
| <i>IVT</i>                                                                                                  | -0.16                                                                                                                                                                                                                                                                                                                                                                                                                                                                                                                                                                                                                                                                                                                                                                                                                                                                      |                                                                                                                                                                                                                                                                                                                                                                                                                                                                                                                                                                                                                              |                                                                                                                                                                                                                                                                                                                                                                                                                                                                                                                                                                                                                                                                            |  |                                   |   |                |                      |                                      |               |                      |                                                                                               |       |  |                       |   |                |      |                           |            |      |            |      |
|                                                                                                             | CMT ( $\mu\text{m}$ )                                                                                                                                                                                                                                                                                                                                                                                                                                                                                                                                                                                                                                                                                                                                                                                                                                                      | p                                                                                                                                                                                                                                                                                                                                                                                                                                                                                                                                                                                                                            |                                                                                                                                                                                                                                                                                                                                                                                                                                                                                                                                                                                                                                                                            |  |                                   |   |                |                      |                                      |               |                      |                                                                                               |       |  |                       |   |                |      |                           |            |      |            |      |
| <i>IVB/IVT</i>                                                                                              | -199                                                                                                                                                                                                                                                                                                                                                                                                                                                                                                                                                                                                                                                                                                                                                                                                                                                                       | 0.132<br>(between groups)                                                                                                                                                                                                                                                                                                                                                                                                                                                                                                                                                                                                    |                                                                                                                                                                                                                                                                                                                                                                                                                                                                                                                                                                                                                                                                            |  |                                   |   |                |                      |                                      |               |                      |                                                                                               |       |  |                       |   |                |      |                           |            |      |            |      |
| <i>IVB</i>                                                                                                  | -179                                                                                                                                                                                                                                                                                                                                                                                                                                                                                                                                                                                                                                                                                                                                                                                                                                                                       |                                                                                                                                                                                                                                                                                                                                                                                                                                                                                                                                                                                                                              |                                                                                                                                                                                                                                                                                                                                                                                                                                                                                                                                                                                                                                                                            |  |                                   |   |                |                      |                                      |               |                      |                                                                                               |       |  |                       |   |                |      |                           |            |      |            |      |
| <i>IVT</i>                                                                                                  | -200                                                                                                                                                                                                                                                                                                                                                                                                                                                                                                                                                                                                                                                                                                                                                                                                                                                                       |                                                                                                                                                                                                                                                                                                                                                                                                                                                                                                                                                                                                                              |                                                                                                                                                                                                                                                                                                                                                                                                                                                                                                                                                                                                                                                                            |  |                                   |   |                |                      |                                      |               |                      |                                                                                               |       |  |                       |   |                |      |                           |            |      |            |      |

| Study                                                                                                                                                                                                                                                                             | Participants and baseline values                                                                                                                                                                                                                                                                                                                                                                                                                                                                                                                                                                                                                                                                                                                                                                                                                                                                                                                                                                                                                          | Intervention                                                                                                                                                                                                                                                                                                                                                                                                                                                                                                                     | Outcome (change from baseline at study end)                                                                                                                                                                                                                                                                                                                                                                                                                                                                                                                                                                                                                                                                                                                                                                                                                                                                                                                                                                                                                                                                                                                                                                                                                                                                                                                                                                                                                                                                                                                                                                                                                                                                                                                                       |  |                   |   |            |                                      |                         |                |              |           |            |                                       |  |  |                      |   |            |                                                                                   |                   |                |                                                                                    |  |            |                                                                                    |  |  |                    |   |            |           |                                      |                |          |  |            |         |  |
|-----------------------------------------------------------------------------------------------------------------------------------------------------------------------------------------------------------------------------------------------------------------------------------|-----------------------------------------------------------------------------------------------------------------------------------------------------------------------------------------------------------------------------------------------------------------------------------------------------------------------------------------------------------------------------------------------------------------------------------------------------------------------------------------------------------------------------------------------------------------------------------------------------------------------------------------------------------------------------------------------------------------------------------------------------------------------------------------------------------------------------------------------------------------------------------------------------------------------------------------------------------------------------------------------------------------------------------------------------------|----------------------------------------------------------------------------------------------------------------------------------------------------------------------------------------------------------------------------------------------------------------------------------------------------------------------------------------------------------------------------------------------------------------------------------------------------------------------------------------------------------------------------------|-----------------------------------------------------------------------------------------------------------------------------------------------------------------------------------------------------------------------------------------------------------------------------------------------------------------------------------------------------------------------------------------------------------------------------------------------------------------------------------------------------------------------------------------------------------------------------------------------------------------------------------------------------------------------------------------------------------------------------------------------------------------------------------------------------------------------------------------------------------------------------------------------------------------------------------------------------------------------------------------------------------------------------------------------------------------------------------------------------------------------------------------------------------------------------------------------------------------------------------------------------------------------------------------------------------------------------------------------------------------------------------------------------------------------------------------------------------------------------------------------------------------------------------------------------------------------------------------------------------------------------------------------------------------------------------------------------------------------------------------------------------------------------------|--|-------------------|---|------------|--------------------------------------|-------------------------|----------------|--------------|-----------|------------|---------------------------------------|--|--|----------------------|---|------------|-----------------------------------------------------------------------------------|-------------------|----------------|------------------------------------------------------------------------------------|--|------------|------------------------------------------------------------------------------------|--|--|--------------------|---|------------|-----------|--------------------------------------|----------------|----------|--|------------|---------|--|
| <p><b>Soheilian 2007 / Soheilian 2009/ Soheilian 2011/ Soheilian 2012</b><br/>[37,41,54,141]<br/><b>Iran</b></p> <p><b>Design:</b> 3-arm RCT<br/><b>Follow-up:</b> 36 weeks</p> <p>[Soheilian 2007 reports 12 week results of the same trial, these were not considered here]</p> | <p><b>Diabetes type:</b> NR<br/><b>HbA1c:</b> 7.2 SD 1.2 to 7.4 SD1.2<br/><b>Baseline VA:</b> 0.62 SD 0.23 to 0.65 SD 0.28 logMAR<br/><b>Baseline CMT:</b> 447 SD 110 to 458 SD 92 <math>\mu</math>m<br/><b>Comorbidities:</b> NR</p> <p><b>N:</b> 150 eyes of 129 patients<br/><b>Inclusion criteria:</b> eyes with clinically significant DMO (ETDRS criteria)<br/><b>Exclusion criteria:</b> previous panretinal of focal laser photocoagulation, prior ocular surgery or injection, history of glaucoma or ocular hypertension, VA <math>\geq</math>20/40 or &lt;20/300, iris neovascularization, high risk PDR, significant media opacity, monocularly, pregnancy, serum creatinine <math>\geq</math>3 mg/dL, uncontrolled DM<br/><b>Age:</b> 61.2 SD6.1 years<br/><b>Sex:</b> 47.3% female<br/><b>Diabetes type:</b> not reported<br/><b>HbA1c:</b> not reported<br/><b>Baseline VA:</b> 0.55 to 0.73 SD0.26 to 0.28 logMAR<br/><b>Baseline CMT:</b> 300 to 359 SD118 to 149 <math>\mu</math>m<br/><b>Comorbidities:</b> 94% NPDR, 6% early PDR</p> | <p><b>Group 1 (IVB, n=50 eyes):</b> IV injection of bevacizumab 1.25 mg (0.05 ml) (retreatment IVB 14 eyes)<br/><b>Group 2 (IVB/IVT, n=50 eyes):</b> IV injection of combined bevacizumab (1.25 mg (0.05 ml)) and triamcinolone (2 mg (0.05 ml)), followed by two injections of bevacizumab alone (retreatment IVB/IVT 10 eyes)<br/><b>Group 3 (MPC, n=50 eyes):</b> focal or modified grid laser (retreatment MPC 3 eyes)</p> <p><b>Regimen for all groups:</b><br/>Retreatments performed at 12 week intervals as required</p> | <p><b>At 36 weeks</b></p> <p><b>BCVA (Snellen chart):</b></p> <table border="1"> <thead> <tr> <th></th> <th>BCVA (logMAR), SD</th> <th>p</th> </tr> </thead> <tbody> <tr> <td><b>IVB</b></td> <td>-0.28 SD0.25<br/>[+14 SD12.5 letters]</td> <td>0.053 vs IVB/IVT or MPC</td> </tr> <tr> <td><b>IVB/IVT</b></td> <td>-0.04 SD0.33</td> <td>NS vs MPC</td> </tr> <tr> <td><b>MPC</b></td> <td>+0.01 SD0.27<br/>[-0.5 SD13.5 letters]</td> <td></td> </tr> </tbody> </table> <p><b>Snellen line changes</b></p> <table border="1"> <thead> <tr> <th></th> <th>Snellen line changes</th> <th>p</th> </tr> </thead> <tbody> <tr> <td><b>IVB</b></td> <td>+2 lines or more: 37.0%<br/>stable within 2 lines: 59.3%<br/>-2 lines or more: 3.7%</td> <td>NS between groups</td> </tr> <tr> <td><b>IVB/IVT</b></td> <td>+2 lines or more: 25.0%<br/>stable within 2 lines: 54.2%<br/>-2 lines or more: 20.8%</td> <td></td> </tr> <tr> <td><b>MPC</b></td> <td>+2 lines or more: 14.8%<br/>stable within 2 lines: 66.7%<br/>-2 lines or more: 18.5%</td> <td></td> </tr> </tbody> </table> <p><b>CMT (OCT):</b></p> <table border="1"> <thead> <tr> <th></th> <th>CMT (<math>\mu</math>m), SD</th> <th>p</th> </tr> </thead> <tbody> <tr> <td><b>IVB</b></td> <td>-56 SD140</td> <td>0.044 vs baseline, NS between groups</td> </tr> <tr> <td><b>IVB/IVT</b></td> <td>-5 SD113</td> <td></td> </tr> <tr> <td><b>MPC</b></td> <td>-8 SD67</td> <td></td> </tr> </tbody> </table> <p>Subgroups:</p> <ul style="list-style-type: none"> <li>larger CMT reduction in subgroup with <math>\geq</math>400 <math>\mu</math>m at baseline (36 weeks: IVB -27.2 SD34.8%, IVB/IVT -8.8 SD35.9%, MPC -15.1 SD14.6%, <math>p &lt; 0.001</math> versus baseline in IVB and MPC groups only)</li> </ul> |  | BCVA (logMAR), SD | p | <b>IVB</b> | -0.28 SD0.25<br>[+14 SD12.5 letters] | 0.053 vs IVB/IVT or MPC | <b>IVB/IVT</b> | -0.04 SD0.33 | NS vs MPC | <b>MPC</b> | +0.01 SD0.27<br>[-0.5 SD13.5 letters] |  |  | Snellen line changes | p | <b>IVB</b> | +2 lines or more: 37.0%<br>stable within 2 lines: 59.3%<br>-2 lines or more: 3.7% | NS between groups | <b>IVB/IVT</b> | +2 lines or more: 25.0%<br>stable within 2 lines: 54.2%<br>-2 lines or more: 20.8% |  | <b>MPC</b> | +2 lines or more: 14.8%<br>stable within 2 lines: 66.7%<br>-2 lines or more: 18.5% |  |  | CMT ( $\mu$ m), SD | p | <b>IVB</b> | -56 SD140 | 0.044 vs baseline, NS between groups | <b>IVB/IVT</b> | -5 SD113 |  | <b>MPC</b> | -8 SD67 |  |
|                                                                                                                                                                                                                                                                                   | BCVA (logMAR), SD                                                                                                                                                                                                                                                                                                                                                                                                                                                                                                                                                                                                                                                                                                                                                                                                                                                                                                                                                                                                                                         | p                                                                                                                                                                                                                                                                                                                                                                                                                                                                                                                                |                                                                                                                                                                                                                                                                                                                                                                                                                                                                                                                                                                                                                                                                                                                                                                                                                                                                                                                                                                                                                                                                                                                                                                                                                                                                                                                                                                                                                                                                                                                                                                                                                                                                                                                                                                                   |  |                   |   |            |                                      |                         |                |              |           |            |                                       |  |  |                      |   |            |                                                                                   |                   |                |                                                                                    |  |            |                                                                                    |  |  |                    |   |            |           |                                      |                |          |  |            |         |  |
| <b>IVB</b>                                                                                                                                                                                                                                                                        | -0.28 SD0.25<br>[+14 SD12.5 letters]                                                                                                                                                                                                                                                                                                                                                                                                                                                                                                                                                                                                                                                                                                                                                                                                                                                                                                                                                                                                                      | 0.053 vs IVB/IVT or MPC                                                                                                                                                                                                                                                                                                                                                                                                                                                                                                          |                                                                                                                                                                                                                                                                                                                                                                                                                                                                                                                                                                                                                                                                                                                                                                                                                                                                                                                                                                                                                                                                                                                                                                                                                                                                                                                                                                                                                                                                                                                                                                                                                                                                                                                                                                                   |  |                   |   |            |                                      |                         |                |              |           |            |                                       |  |  |                      |   |            |                                                                                   |                   |                |                                                                                    |  |            |                                                                                    |  |  |                    |   |            |           |                                      |                |          |  |            |         |  |
| <b>IVB/IVT</b>                                                                                                                                                                                                                                                                    | -0.04 SD0.33                                                                                                                                                                                                                                                                                                                                                                                                                                                                                                                                                                                                                                                                                                                                                                                                                                                                                                                                                                                                                                              | NS vs MPC                                                                                                                                                                                                                                                                                                                                                                                                                                                                                                                        |                                                                                                                                                                                                                                                                                                                                                                                                                                                                                                                                                                                                                                                                                                                                                                                                                                                                                                                                                                                                                                                                                                                                                                                                                                                                                                                                                                                                                                                                                                                                                                                                                                                                                                                                                                                   |  |                   |   |            |                                      |                         |                |              |           |            |                                       |  |  |                      |   |            |                                                                                   |                   |                |                                                                                    |  |            |                                                                                    |  |  |                    |   |            |           |                                      |                |          |  |            |         |  |
| <b>MPC</b>                                                                                                                                                                                                                                                                        | +0.01 SD0.27<br>[-0.5 SD13.5 letters]                                                                                                                                                                                                                                                                                                                                                                                                                                                                                                                                                                                                                                                                                                                                                                                                                                                                                                                                                                                                                     |                                                                                                                                                                                                                                                                                                                                                                                                                                                                                                                                  |                                                                                                                                                                                                                                                                                                                                                                                                                                                                                                                                                                                                                                                                                                                                                                                                                                                                                                                                                                                                                                                                                                                                                                                                                                                                                                                                                                                                                                                                                                                                                                                                                                                                                                                                                                                   |  |                   |   |            |                                      |                         |                |              |           |            |                                       |  |  |                      |   |            |                                                                                   |                   |                |                                                                                    |  |            |                                                                                    |  |  |                    |   |            |           |                                      |                |          |  |            |         |  |
|                                                                                                                                                                                                                                                                                   | Snellen line changes                                                                                                                                                                                                                                                                                                                                                                                                                                                                                                                                                                                                                                                                                                                                                                                                                                                                                                                                                                                                                                      | p                                                                                                                                                                                                                                                                                                                                                                                                                                                                                                                                |                                                                                                                                                                                                                                                                                                                                                                                                                                                                                                                                                                                                                                                                                                                                                                                                                                                                                                                                                                                                                                                                                                                                                                                                                                                                                                                                                                                                                                                                                                                                                                                                                                                                                                                                                                                   |  |                   |   |            |                                      |                         |                |              |           |            |                                       |  |  |                      |   |            |                                                                                   |                   |                |                                                                                    |  |            |                                                                                    |  |  |                    |   |            |           |                                      |                |          |  |            |         |  |
| <b>IVB</b>                                                                                                                                                                                                                                                                        | +2 lines or more: 37.0%<br>stable within 2 lines: 59.3%<br>-2 lines or more: 3.7%                                                                                                                                                                                                                                                                                                                                                                                                                                                                                                                                                                                                                                                                                                                                                                                                                                                                                                                                                                         | NS between groups                                                                                                                                                                                                                                                                                                                                                                                                                                                                                                                |                                                                                                                                                                                                                                                                                                                                                                                                                                                                                                                                                                                                                                                                                                                                                                                                                                                                                                                                                                                                                                                                                                                                                                                                                                                                                                                                                                                                                                                                                                                                                                                                                                                                                                                                                                                   |  |                   |   |            |                                      |                         |                |              |           |            |                                       |  |  |                      |   |            |                                                                                   |                   |                |                                                                                    |  |            |                                                                                    |  |  |                    |   |            |           |                                      |                |          |  |            |         |  |
| <b>IVB/IVT</b>                                                                                                                                                                                                                                                                    | +2 lines or more: 25.0%<br>stable within 2 lines: 54.2%<br>-2 lines or more: 20.8%                                                                                                                                                                                                                                                                                                                                                                                                                                                                                                                                                                                                                                                                                                                                                                                                                                                                                                                                                                        |                                                                                                                                                                                                                                                                                                                                                                                                                                                                                                                                  |                                                                                                                                                                                                                                                                                                                                                                                                                                                                                                                                                                                                                                                                                                                                                                                                                                                                                                                                                                                                                                                                                                                                                                                                                                                                                                                                                                                                                                                                                                                                                                                                                                                                                                                                                                                   |  |                   |   |            |                                      |                         |                |              |           |            |                                       |  |  |                      |   |            |                                                                                   |                   |                |                                                                                    |  |            |                                                                                    |  |  |                    |   |            |           |                                      |                |          |  |            |         |  |
| <b>MPC</b>                                                                                                                                                                                                                                                                        | +2 lines or more: 14.8%<br>stable within 2 lines: 66.7%<br>-2 lines or more: 18.5%                                                                                                                                                                                                                                                                                                                                                                                                                                                                                                                                                                                                                                                                                                                                                                                                                                                                                                                                                                        |                                                                                                                                                                                                                                                                                                                                                                                                                                                                                                                                  |                                                                                                                                                                                                                                                                                                                                                                                                                                                                                                                                                                                                                                                                                                                                                                                                                                                                                                                                                                                                                                                                                                                                                                                                                                                                                                                                                                                                                                                                                                                                                                                                                                                                                                                                                                                   |  |                   |   |            |                                      |                         |                |              |           |            |                                       |  |  |                      |   |            |                                                                                   |                   |                |                                                                                    |  |            |                                                                                    |  |  |                    |   |            |           |                                      |                |          |  |            |         |  |
|                                                                                                                                                                                                                                                                                   | CMT ( $\mu$ m), SD                                                                                                                                                                                                                                                                                                                                                                                                                                                                                                                                                                                                                                                                                                                                                                                                                                                                                                                                                                                                                                        | p                                                                                                                                                                                                                                                                                                                                                                                                                                                                                                                                |                                                                                                                                                                                                                                                                                                                                                                                                                                                                                                                                                                                                                                                                                                                                                                                                                                                                                                                                                                                                                                                                                                                                                                                                                                                                                                                                                                                                                                                                                                                                                                                                                                                                                                                                                                                   |  |                   |   |            |                                      |                         |                |              |           |            |                                       |  |  |                      |   |            |                                                                                   |                   |                |                                                                                    |  |            |                                                                                    |  |  |                    |   |            |           |                                      |                |          |  |            |         |  |
| <b>IVB</b>                                                                                                                                                                                                                                                                        | -56 SD140                                                                                                                                                                                                                                                                                                                                                                                                                                                                                                                                                                                                                                                                                                                                                                                                                                                                                                                                                                                                                                                 | 0.044 vs baseline, NS between groups                                                                                                                                                                                                                                                                                                                                                                                                                                                                                             |                                                                                                                                                                                                                                                                                                                                                                                                                                                                                                                                                                                                                                                                                                                                                                                                                                                                                                                                                                                                                                                                                                                                                                                                                                                                                                                                                                                                                                                                                                                                                                                                                                                                                                                                                                                   |  |                   |   |            |                                      |                         |                |              |           |            |                                       |  |  |                      |   |            |                                                                                   |                   |                |                                                                                    |  |            |                                                                                    |  |  |                    |   |            |           |                                      |                |          |  |            |         |  |
| <b>IVB/IVT</b>                                                                                                                                                                                                                                                                    | -5 SD113                                                                                                                                                                                                                                                                                                                                                                                                                                                                                                                                                                                                                                                                                                                                                                                                                                                                                                                                                                                                                                                  |                                                                                                                                                                                                                                                                                                                                                                                                                                                                                                                                  |                                                                                                                                                                                                                                                                                                                                                                                                                                                                                                                                                                                                                                                                                                                                                                                                                                                                                                                                                                                                                                                                                                                                                                                                                                                                                                                                                                                                                                                                                                                                                                                                                                                                                                                                                                                   |  |                   |   |            |                                      |                         |                |              |           |            |                                       |  |  |                      |   |            |                                                                                   |                   |                |                                                                                    |  |            |                                                                                    |  |  |                    |   |            |           |                                      |                |          |  |            |         |  |
| <b>MPC</b>                                                                                                                                                                                                                                                                        | -8 SD67                                                                                                                                                                                                                                                                                                                                                                                                                                                                                                                                                                                                                                                                                                                                                                                                                                                                                                                                                                                                                                                   |                                                                                                                                                                                                                                                                                                                                                                                                                                                                                                                                  |                                                                                                                                                                                                                                                                                                                                                                                                                                                                                                                                                                                                                                                                                                                                                                                                                                                                                                                                                                                                                                                                                                                                                                                                                                                                                                                                                                                                                                                                                                                                                                                                                                                                                                                                                                                   |  |                   |   |            |                                      |                         |                |              |           |            |                                       |  |  |                      |   |            |                                                                                   |                   |                |                                                                                    |  |            |                                                                                    |  |  |                    |   |            |           |                                      |                |          |  |            |         |  |

Abbreviations: See table 2

**Table 89: Ranibizumab safety data**

|                              | READ-2 study[28,47]                         | RESOLVE study[36]                                    | RESTORE study[24]                               | RISE study[38]                         | RIDE study[38]                         |
|------------------------------|---------------------------------------------|------------------------------------------------------|-------------------------------------------------|----------------------------------------|----------------------------------------|
| Number of patients           | IVR: n=42; L: n=42; IVRL: n=42              | IVR0.3: n=51; IVR0.5: n=51; C: n=49                  | IVR: n=116; IVRL: n=118; L: n=111               | IVR0.3: 125; IVR0.5: 126; C: 123       | IVR0.3: 125; IVR0.5: 124; C: 127       |
| <b>Ocular adverse events</b> |                                             |                                                      |                                                 |                                        |                                        |
| Eye pain                     | NR                                          | IVR0.3: n=9 (18%); IVR0.5: n=9 (18%); C: n=10 (20%)  | IVR: n=13 (11%); IVRL: n=10 (8%); L: n=12 (11%) | IVR0.3: 26%; IVR0.5: 21%; C: 19%       | IVR0.3: 8%; IVR0.5: 12.9%; C: 7.1%     |
| Conjunctival hyperaemia      | NR                                          | NR                                                   | IVR: n=9 (8%); IVRL: n=6 (5%); L: n=6 (5%)      | NR                                     | NR                                     |
| Conjunctival haemorrhage     | NR                                          | IVR0.3: n=10 (20%); IVR0.5: n=13 (25%); C: n=7 (14%) | IVR: n=8 (7%); IVRL: n=10 (8%); L: n=0          | IVR0.3: 54%; IVR0.5: 52%; C: 32%       | IVR0.3: 40.8%; IVR0.5: 50.0%; C: 31.5% |
| IOP increase                 | NR                                          | IVR0.3: n=6 (12%); IVR0.5: n=15 (29%); C: n=1 (2%)   | IVR: n=1 (<1%); IVRL: n=1 (<1%)                 | IVR0.3: 20%; IVR0.5: 14%; C: 2%        | IVR0.3: 15.2%; IVR0.5: 18.5%; C: 11%   |
| Vitreous haemorrhage         | IVR: n=1 (2%); L: n=4 (10%); IVRL: n=3 (7%) | IVR0.3: n=1 (2%); IVR0.5: n=0; C: n=0                | NR                                              | IVR0.3: 3.2%; IVR0.5: 3.2%; C: 13%     | IVR0.3: 0.8%; IVR0.5: 2.4%; C: 15%     |
| Substantial worsening of DMO | L: n=1 (2%)                                 |                                                      | NR                                              | NR                                     | NR                                     |
| Retinal ischaemia            | NR                                          | IVR0.3: n=0; IVR0.5: n=1 (2%); C: n=0                | NR                                              | NR                                     | NR                                     |
| Retinal artery occlusion     | NR                                          | IVR0.3: n=0; IVR0.5: n=1 (2%); C: n=0                | NR                                              | NR                                     | NR                                     |
| Endophthalmitis              | NR                                          | IVR0.3: n=1 (2%); IVR0.5: n=1 (2%); C: n=0           | NR                                              | IVR0.3: 0.8%; IVR0.5: 0; C: 0          | IVR0.3 + IVR0.5: 1.2%; C: 0%           |
| Retinal detachment           | NR                                          | IVR0.3: n=0; IVR0.5: n=0; C: n=1 (2%)                | NR                                              | IVR0.3: 0.8%; IVR0.5: 0; C: 0.8%       | IVR0.3 + IVR0.5: 0.4%; C: 0%           |
| Neovascularisation           | NR                                          | NR                                                   | NR                                              | IVR0.3: 0; IVR0.5: 0; C: 0.8%          | IVR0.3: 0.8%; IVR0.5: 0.8%; C: 5.5%    |
| Traumatic cataract           | NR                                          | NR                                                   | NR                                              | IVR0.3: 0.8%; IVR0.5: 0.8%; C: 0       | IVR0.3 + IVR0.5: 0.4%; C: 0%           |
| Uveitis                      | NR                                          | NR                                                   | NR                                              | NR                                     | IVR0.3 + IVR0.5: 0.4%; C: 0%           |
| Macular oedema               | NR                                          | NR                                                   | NR                                              | IVR0.3: 16.8%; IVR0.5: 20.6%; C: 21.1% | IVR0.3: 19.2%; IVR0.5: 13.7%; C: 20.5% |
| Retinal exudates             | NR                                          | NR                                                   | NR                                              | IVR0.3: 19.2%; IVR0.5: 17.5%; C: 20.3% | IVR0.3: 16.0%; IVR0.5: 15.3%; C: 11.0% |
| Retinal haemorrhage          | NR                                          | NR                                                   | NR                                              | IVR0.3: 12.8%; IVR0.5: 12.7%; C: 20.3% | IVR0.3: 15.2%; IVR0.5: 22.6%; C: 18.9% |

|                                  |                                                              |                                                   |                                              |                                                                              |                                                                                                                               |
|----------------------------------|--------------------------------------------------------------|---------------------------------------------------|----------------------------------------------|------------------------------------------------------------------------------|-------------------------------------------------------------------------------------------------------------------------------|
| Cataract                         | NR                                                           | NR                                                | NR                                           | IVR0.3: 16.8%; IVR0.5: 11.9%; C: 14.6%                                       | IVR0.3: 20.0%; IVR0.5: 23.4%; C: 23.6%                                                                                        |
| Vitreous detachment              | NR                                                           | NR                                                | NR                                           | IVR0.3: 13.6%; IVR0.5: 11.1%; C: 15.4%                                       | IVR0.3: 8.8%; IVR0.5: 12.9%; C: 15.0%                                                                                         |
| Ocular hyperemia                 | NR                                                           | NR                                                | NR                                           | IVR0.3: 15.2%; IVR0.5: 11.1%; C: 10.6%                                       | IVR0.3: 3.2%; IVR0.5: 3.2%; C: 7.9%                                                                                           |
| Vitreous floaters                | NR                                                           | NR                                                | NR                                           | IVR0.3: 12.8%; IVR0.5: 14.3%; C: 5.7%                                        | IVR0.3: 7.2%; IVR0.5: 8.1%; C: 3.1%                                                                                           |
| Eye irritation                   | NR                                                           | NR                                                | NR                                           | IVR0.3: 10.4%; IVR0.5: 9.5%; C: 6.5%                                         | IVR0.3: 5.6%; IVR0.5: 5.6%; C: 3.1%                                                                                           |
| Foreign body sensation in eyes   | NR                                                           | NR                                                | NR                                           | IVR0.3: 12.8%; IVR0.5: 7.1%; C: 4.1%                                         | IVR0.3: 8.0%; IVR0.5: 2.4%; C: 5.5%                                                                                           |
| <b>Systematic adverse events</b> |                                                              |                                                   |                                              |                                                                              |                                                                                                                               |
| Arterial thromboembolic events   | Stroke in 1 pt (2%) in IVRL group- not related to study drug | IVR0.3: n=0; IVR0.5: n=3 (6%); C: n=2 (4%)        | IVR: n=6 (5%); IVRL: n=1 (<1%); L: n=1 (<1%) | IVR0.3: 3.2% (n=1 stroke); IVR0.5: 7.9% (n=5 strokes); C: 7.3% (n=2 strokes) | IVR0.3: 1.6% (stroke), 5.6% (heart attack); IVR0.5: 2.4% (stroke), 2.4% (heart attack); C: 1.6% (stroke), 5.6% (heart attack) |
| Hypertension                     | NR                                                           | IVR0.3: n=4 (8%); IVR0.5: n=5 (10%); C: n=5 (10%) | IVR: n=9 (8%); IVRL: n=6 (5%); L: n=9 (8%)   | Serious IVR0.3: 0.8%; IVR0.5: 3.2%; C: 0.8%                                  | Serious IVR0.3: 1.6%; IVR0.5: 1.6%; C: 0%                                                                                     |
| Non-ocular haemorrhage           | NR                                                           | IVR0.3: n=1 (2%); IVR0.5: n=1 (2%); C: n=0        | IVR: n=1 (<1%); IVRL: n=0; L: n=1 (<1%)      | NR                                                                           | NR                                                                                                                            |
| Proteinuria                      | NR                                                           | NR                                                | IVR: n=1 (<1%); IVRL: n=1 (<1%); L: n=0      | NR                                                                           | NR                                                                                                                            |
| Deaths                           | 1 (2%) due to CVA in IVRL group                              | NR                                                | IVR: n=2 (2%); IVRL: n=2 (2%); L: n=2 (2%)   | IVR0.3: 2.4%; IVR0.5: 4.0%; C: 0.8%                                          | IVR0.3: 3.2%; IVR0.5: 4.8%; C: 1.6%                                                                                           |

NR – not reported, IVR – intra-vitreous ranibizumab, IVRL – intra-vitreous ranibizumab plus laser, C – control, L – laser, IOP – intra-ocular pressure, DMO – diabetic macular oedema,

Table 910: Bevacizumab safety

|                                                        | BOLT study[23,52]                                              | Lam 2009[35]                                                                                                                                                               | Faghihi 2010[53]                      |
|--------------------------------------------------------|----------------------------------------------------------------|----------------------------------------------------------------------------------------------------------------------------------------------------------------------------|---------------------------------------|
| Number of patients                                     | MLT: n=38; IVB: n=42                                           | IVB1.25, n=26; IVB2.5, n=26                                                                                                                                                | IVB 1.25 n= 40 IVB 1.25 plus MLT n=40 |
| <b>Ocular adverse events</b>                           |                                                                |                                                                                                                                                                            | <b>Not reported</b>                   |
| Loss of _15 or _30 ETDRS letters                       | MLT: n=1 transient, 3 at 24 month analysis; IVB: n=4 transient | No significant ocular events (IOP increase, retinal tear, retinal detachment, endophthalmitis); no significant difference in change in cataract scores between groups      |                                       |
| Vitreous haemorrhage                                   | MLT: n=1; IVB: n=0                                             |                                                                                                                                                                            |                                       |
| Eye pain/irritation/watering during or after injection | MLT:n= 0; IVB: n=8                                             |                                                                                                                                                                            |                                       |
| Red eye after injection                                | MLT: n=0; IVB: n=8                                             |                                                                                                                                                                            |                                       |
| Endophthalmitis                                        | NR                                                             |                                                                                                                                                                            |                                       |
| Transient IOP increase                                 | ≥30 mm Hg - MLT: 0; IVB: n=4≥ 45 mm Hg - MLT: n=1; IVB: n=1    |                                                                                                                                                                            |                                       |
| Floater after injection                                | MLT: n= 0; IVB: n=2                                            |                                                                                                                                                                            |                                       |
| Corneal epithelial defect                              | MLT:n=0; IVB:n=1                                               |                                                                                                                                                                            |                                       |
| Vitreomacular traction with macular oedema             | MLT: n=1; IVB: n=0                                             |                                                                                                                                                                            |                                       |
| <b>Systematic adverse events</b>                       |                                                                |                                                                                                                                                                            |                                       |
| Anaemia                                                | MLT: n=1; IVB: n=0                                             | no systematic adverse effects (1 patient in 1.25 mg group with foot gangrene requiring amputation due to worsening diabetic neuropathy, considered unrelated to treatment) |                                       |
| Vomiting after FFA                                     | MLT: n=1; IVB: n=0                                             |                                                                                                                                                                            |                                       |
| Uncontrolled hypertension                              | MLT:n=0; IVB: n=1                                              |                                                                                                                                                                            |                                       |
| Polymyalgia rheumatica                                 | MLT:n=0; IVB: n=1                                              |                                                                                                                                                                            |                                       |
| Intermittent claudication                              | MLT:n=0; IVB: n=1                                              |                                                                                                                                                                            |                                       |
| Gastroenteritis                                        | MLT:n=0; IVB: n=1                                              |                                                                                                                                                                            |                                       |
| Fall                                                   | MLT:n=2; IVB: n=0                                              |                                                                                                                                                                            |                                       |
| Urinary tract infection                                | MLT:n=0; IVB: n=1                                              |                                                                                                                                                                            |                                       |
| Chest infection                                        | MLT:n=0; IVB: n=1                                              |                                                                                                                                                                            |                                       |
| Headaches, dizziness, tiredness                        | MLT:n=1; IVB: n=0                                              |                                                                                                                                                                            |                                       |
| Bell palsy                                             | MLT:n=1; IVB: n=0                                              |                                                                                                                                                                            |                                       |
| Admission for diabetic foot ulcer                      | MLT:n=1; IVB: n=1                                              |                                                                                                                                                                            |                                       |
| Admission for cholecystectomy                          | MLT:n=0; IVB: n=1                                              |                                                                                                                                                                            |                                       |
| Admission for fall/loss of consciousness               | MLT:n=1; IVB: n=0                                              |                                                                                                                                                                            |                                       |
| Angina-hospital admission                              | MLT:n=1; IVB: n=0                                              |                                                                                                                                                                            |                                       |
| Cerebrovascular accident                               | MLT:n=1; IVB: n=0                                              |                                                                                                                                                                            |                                       |
| Myocardial infarction                                  | MLT:n=0; IVB: n=2                                              |                                                                                                                                                                            |                                       |
| Coronary artery bypass graft                           | MLT:n=0; IVB: n=1                                              |                                                                                                                                                                            |                                       |
| Dyspnea, chest pain-admitted for hospital observation  | MLT:n=0; IVB: n=1                                              |                                                                                                                                                                            |                                       |



1  
2  
3  
4  
5  
6  
7  
8  
9  
10  
11  
12  
13  
14  
15  
16  
17  
18  
19  
20  
21  
22  
23  
24  
25  
26  
27  
28  
29  
30  
31  
32  
33  
34  
35  
36  
37  
38  
39  
40  
41  
42  
43  
44  
45  
46  
47  
48  
49

|       |    |  |  |
|-------|----|--|--|
| DEATH | NR |  |  |
|-------|----|--|--|

For peer review only

77

Table 11:0 Pegaptanib safety

|                                  | Cunningham 2005/Adamis 2006[39,57]                  | Sultan 2011[40]                |
|----------------------------------|-----------------------------------------------------|--------------------------------|
| Number of patients               | IVP0.3, n=44 eyes; IVP1, n=44 eyes; IVP3, n=42 eyes | IVP, n=133 eyes; C, n=127 eyes |
| <b>Ocular adverse events</b>     |                                                     |                                |
| Eye pain                         | Pegaptanib: 31%; C: 17%                             | IVP: 11.1%; C: 7.0%            |
| Vitreous haemorrhage             | Pegaptanib: 22%; C: 7%                              | IVP: 6.3%; C: 7.7%             |
| Punctuate keratitis              | Pegaptanib: 18%; C: 17%                             | IVP: 11.8%; C: 6.3%            |
| Cataract                         | Pegaptanib: 13%; C: 10%                             | IVP: 8.3%; C: 9.2%             |
| Eye discharge                    | Pegaptanib: 11%; C: 10%                             | NR                             |
| Conjunctival haemorrhage         | Pegaptanib: 10%; C: 0%                              | IVP: 22.2%; C: 14.1%           |
| Vitreous opacities               | Pegaptanib: 9%; C: 5%                               | NR                             |
| Blurred vision                   | Pegaptanib: 7%; C: 5%                               | NR                             |
| Other vitreous disorder          | Pegaptanib: 7%; C: 0%                               | NR                             |
| Other visual disturbance         | Pegaptanib: 7%; C: 0%                               | NR                             |
| Culture-negative endophthalmitis | Pegaptanib: n=1                                     | NR                             |
| IOP increase                     | NR                                                  | IVP: 17.4%; C: 6.3%            |
| Retinal haemorrhage              | NR                                                  | IVP: 6.3%; C: 10.6%            |
| Retinal exudates                 | NR                                                  | IVP: 6.3%; C: 5.6%             |
| Conjunctivitis                   | NR                                                  | IVP: 5.6%; C: 4.2%             |
| Lacrimation increased            | NR                                                  | IVP: 5.6%; C: 2.8%             |
| Diabetic retinal oedema          | NR                                                  | IVP: 11.1%; C: 17.6%           |
| Macular oedema                   | NR                                                  | IVP: 9.7%; C: 11.6%            |
| <b>Systemic adverse events</b>   |                                                     |                                |
| Non-ocular hypertension          | NR                                                  | IVP: 13.9%; C: 9.9%            |
| Cardiac disorders                | NR                                                  | IVP: 6.9%; C: 5.6%             |
| <b>DEATHS</b>                    | NR                                                  | IVP: n=4                       |

Table 121: aflibercept safety

|                              | DA VINCI 2010[30,58]                                                            |
|------------------------------|---------------------------------------------------------------------------------|
| Number of patients           | IVVTE (all doses) n=175, laser n = 44                                           |
| <b>Ocular adverse events</b> |                                                                                 |
| Conjunctival hemorrhage      | At 6 months: Laser 18.2%, IVVTE 18.9%<br>At 12 months: Laser 18.2%, IVVTE 26.9% |
| IOP increase                 | At 6 months: Laser 2.3%, IVVTE 9.7%<br>At 12 months: Laser 2.3%, IVVTE 9.7%     |
| Eye pain                     | At 6 months: Laser 4.5%, IVVTE 8.6%<br>At 12 months: Laser 4.5%, IVVTE 13.7%    |
| Ocular hyperaemia            | At 6 months: Laser 4.5%, IVVTE 6.3%<br>At 12 months: Laser 4.5%, IVVTE 7.4%     |
| Vitreous floaters            | At 6 months: Laser 4.5%, IVVTE 5.1%<br>At 12 months: Laser 4.5%, IVVTE 6.9%     |
| Endophthalmitis              | At 6 months: Laser 0%, IVVTE 1.1%<br>At 12 months: Laser 0%, IVVTE 1.1%         |
| Uveitis                      | At 6 months: Laser 0%, IVVTE 0.6%<br>At 12 months: Laser 0%, IVVTE 0.6%         |
| Diabetic retinal oedema      | At 6 months: Laser 2.3%, IVVTE 0%<br>At 12 months: Laser 2.3%, IVVTE 4.6%       |
| Visual acuity reduced        | At 6 months: Laser 2.3%, IVVTE 0%<br>At 12 months: Laser 2.3%, IVVTE 0%         |
| Vitreous hemorrhage          | At 6 months: Laser 2.3%, IVVTE 0%<br>At 12 months: Laser 6.8%, IVVTE 0%         |
| Corneal abrasion             | At 6 months: Laser 0%, IVVTE 0.6%<br>At 12 months: Laser 0%, IVVTE 4.6%         |
| Retinal tear                 | At 6 months: Laser 0%, IVVTE 0.6%<br>At 12 months: NR                           |
| <b>Systematic events</b>     |                                                                                 |
| Hypertension                 | At 6 months: Laser 6.8%, IVVTE 9.7%<br>At 12 months: Laser 0%, IVVTE 1.7%       |
| Myocardial infarction        | At 6 months: Laser 0%, IVVTE 1.1%<br>At 12 months: Laser 0%, IVVTE 1.7%         |
| Cerebrovascular event        | At 6 months: Laser 0%, IVVTE 1.1%<br>At 12 months: Laser 2.3%, IVVTE 1.7%       |
| Death                        | At 6 months: Laser 0%, IVVTE 1.7%<br>At 12 months: Laser 2.3%, IVVTE 4.0%       |

**Table 123: Dexamethasone safety**

|                              | Callanan 2011[44]                                          | Haller 2010[59]                                                                                                                                              |
|------------------------------|------------------------------------------------------------|--------------------------------------------------------------------------------------------------------------------------------------------------------------|
| Number of patients           |                                                            |                                                                                                                                                              |
| <b>Ocular adverse events</b> |                                                            |                                                                                                                                                              |
| IOP elevation                | DIL: 20% (p<0.001); 1% ≥10 mm Hg<br>L: 1.6% ; 0% ≥10 mm Hg |                                                                                                                                                              |
| Cataract                     | NR                                                         | NR                                                                                                                                                           |
| Anterior chamber cells       | NR                                                         | DDS350: 29.1%; DDS700: 26.4%; C: 1.8%                                                                                                                        |
| Anterior chamber flare       | NR                                                         | DDS350: 27.3%; DDS700: 20.8%; C: 8.8%                                                                                                                        |
| Vitreous haemorrhage         | NR                                                         | DDS350: 20.0%; DDS700: 22.6%; C: 5.3%                                                                                                                        |
| Eye pain                     | NR                                                         | DDS350: 18.2%; DDS700: 9.4%; C: 3.5%                                                                                                                         |
| Vitreous disorder            | NR                                                         | DDS350: 20.0%; DDS700: 15.1%; C: 3.5%                                                                                                                        |
| Increased IOP                | NR                                                         | DDS350: 14.5%; DDS700: 9.4%; C: 0%                                                                                                                           |
| Conjunctival haemorrhage     | NR                                                         | DDS350: 14.5%; DDS700: 7.5%; C: 0%                                                                                                                           |
| Vitreous floaters            | NR                                                         | DDS350: 7.3%; DDS700: 17.0%; C: 0%                                                                                                                           |
|                              |                                                            | No significant differences in: reduced VA, eye irritation, abnormal sensation in eye, macular oedema, eye pruritus, retinal hemorrhage, DR, nonocular events |

**Table 134: Fluocinolone safety**

|                                            | FAME study (Campochiaro 2011/2012)[29,60]                                                                                                                                                                                                                           | Pearson 2011[43]        |
|--------------------------------------------|---------------------------------------------------------------------------------------------------------------------------------------------------------------------------------------------------------------------------------------------------------------------|-------------------------|
| Number of patients                         |                                                                                                                                                                                                                                                                     |                         |
| <b>Ocular adverse events</b>               |                                                                                                                                                                                                                                                                     |                         |
| IOP at 12 months                           | NR                                                                                                                                                                                                                                                                  | NR                      |
| Progression of cataract                    | NR                                                                                                                                                                                                                                                                  | NR                      |
| Cataract                                   | NR                                                                                                                                                                                                                                                                  | SRFA: 55.9%; SOC: 21.7% |
| Transient vitreous floaters                | NR                                                                                                                                                                                                                                                                  | NR                      |
| Transient subconjunctival haemorrhage      | NR                                                                                                                                                                                                                                                                  | NR                      |
| Cataract surgery                           | SRFA0.2: 41.1% (74.9% of those without cataract surgery at baseline, 80.0% at 36 months); SRFA0.5: 50.9% (84.5% of those without cataract surgery at baseline, 87.2% at 36 months); C: 7% (23.1% of those without cataract surgery at baseline, 27.3% at 36 months) | NR                      |
| Glaucoma                                   | SRFA0.2: 1.6%; SRFA0.5: 2.3%; C: 0.5%                                                                                                                                                                                                                               | NR                      |
| Increased IOP                              | SRFA0.2: 3.2%; SRFA0.5: 3.3%; C: 0%                                                                                                                                                                                                                                 | SRFA: 69.3%; SOC: 11.6% |
| IOP >30 mmHg at any point during 36 months | SRFA0.2: 18.4%; SRFA0.5: 22.9%; C: 4.3%                                                                                                                                                                                                                             | NR                      |
| Trabeculectomy                             | SRFA0.2: 2.1%; SRFA0.5: 4.8%; C: 0%                                                                                                                                                                                                                                 | NR                      |
| Other glaucoma surgery                     | SRFA0.2: 1.3%; SRFA0.5: 1.3%; C: 0.5%                                                                                                                                                                                                                               | NR                      |
| Trabeculectomy                             | SRFA0.2: 0.8%; SRFA0.5: 2.3%; C: 0%                                                                                                                                                                                                                                 | NR                      |
| Vitreous haemorrhage                       | NR                                                                                                                                                                                                                                                                  | SRFA: 40.2%; SOC: 18.8% |
| Abnormal sensation in eye                  | NR                                                                                                                                                                                                                                                                  | SRFA: 37%; SOC: 11.6%   |
| Macular oedema                             | NR                                                                                                                                                                                                                                                                  | SRFA: 34.6%             |
| Eye pain                                   | NR                                                                                                                                                                                                                                                                  | SRFA: 26.8%; SOC: 15.9% |
| Eye irritation                             | NR                                                                                                                                                                                                                                                                  | SRFA: 22%; SOC: 10.1%   |
| Increased lacrimation                      | NR                                                                                                                                                                                                                                                                  | SRFA: 22%; SOC: 8.7%    |
| Photophobia                                | NR                                                                                                                                                                                                                                                                  | SRFA: 21.3%; SOC: 21.7% |
| Blurred vision                             | NR                                                                                                                                                                                                                                                                  | SRFA: 21.3%; SOC: 15.9% |
| Vitreous floaters                          | NR                                                                                                                                                                                                                                                                  | SRFA: 21.3%; SOC: 8.7%  |
| <b>Systemic adverse events</b>             |                                                                                                                                                                                                                                                                     |                         |
| Serious cardiovascular events              | SRFA0.2: 12.0%; SRFA0.5: 13.2%; C: 10.3%                                                                                                                                                                                                                            |                         |
| Pruritus                                   | NR                                                                                                                                                                                                                                                                  | SRFA: 38.6%; SOC: 21.7% |
| DEATHS                                     | NR                                                                                                                                                                                                                                                                  | NR                      |

**Table 145: Triamcinolone safety**

|                                    | DRCR Network 2008 (Ip 2008a / Ip 2008b / Beck 2009 / Bressler 2009) [22,61,63,64]                                                                                                                  | Gillies 2006 / 2007 / 2009 / Sutter 2004[32,136-138]                                       | Gillies 2011[33]            | Kim 2010[45] | Lam 2007[34]                                               | Ockrim 2008 / Sivaprasad 2008[42,62]                                                                   |
|------------------------------------|----------------------------------------------------------------------------------------------------------------------------------------------------------------------------------------------------|--------------------------------------------------------------------------------------------|-----------------------------|--------------|------------------------------------------------------------|--------------------------------------------------------------------------------------------------------|
| Number of patients                 |                                                                                                                                                                                                    |                                                                                            |                             |              |                                                            |                                                                                                        |
| <b>Ocular adverse events</b>       |                                                                                                                                                                                                    |                                                                                            |                             |              |                                                            |                                                                                                        |
|                                    | At 2 years (or 3 years when indicated)                                                                                                                                                             | At 2 years                                                                                 | -                           | Not reported | -                                                          | At 12 months                                                                                           |
| IOP $\geq$ 30 mm Hg                | IVT1: n=22; IVT4: n=53; L: n=3                                                                                                                                                                     | NR                                                                                         | NR                          |              | NR                                                         | IVT: IOP significantly higher than in L group (18.2 mm Hg, range 12 to 26 mm Hg); no cases of glaucoma |
| IOP >22 mm Hg                      | NR                                                                                                                                                                                                 | NR                                                                                         | NR                          |              | IVT: 37% (p=0.002 vs. L); IVTL: 36% (p=0.002 vs. L); L: 5% | NR                                                                                                     |
| IOP $\geq$ 10 mm Hg from baseline  | IVT1: n=41; IVT4: n=85; L: n=12                                                                                                                                                                    | NR                                                                                         | NR                          |              | NR                                                         | NR                                                                                                     |
| IOP $\geq$ 5 mm Hg                 | NR                                                                                                                                                                                                 | IVT: 68% (p=0.007 vs. C); C: 10%                                                           | NR                          |              | NR                                                         | NR                                                                                                     |
| IOP lowering medication used       | IVT1: n=31; IVT4: n=76; L: n=25                                                                                                                                                                    | IVT: 44% (p=0.0002 vs. C); C: 3%                                                           | IVTL: 64% (P<0.001); L: 24% |              | NR                                                         | NR                                                                                                     |
| Cataract surgery                   | IVT1: 23% (of those phakic at baseline, 46% by 3 years (p<0.001 between all groups); IVT4: 51% (of those phakic at baseline, 83% by 3 years); L: 13% (of those phakic at baseline, 31% by 3 years) | IVT: 56% (of phakic eyes over 3 years, p<0.001 vs. C); C: 8% (of phakic eyes over 3 years) |                             |              | NR                                                         | NR                                                                                                     |
| Ptoxis                             | NR                                                                                                                                                                                                 | NR                                                                                         | NR                          |              | NR                                                         | NR                                                                                                     |
| Retinal detachment                 | IVT1: n=2; IVT4: n=4; L: n=2                                                                                                                                                                       | NR                                                                                         | NR                          |              | None                                                       | NR                                                                                                     |
| Retinal vein occlusion             | IVT1: n=1; IVT4: n=2; L: n=3                                                                                                                                                                       | NR                                                                                         | NR                          |              | NR                                                         | NR                                                                                                     |
| Retinal artery occlusion           | IVT1: n=0; IVT4: n=0; L: n=1                                                                                                                                                                       | NR                                                                                         | NR                          |              | NR                                                         | NR                                                                                                     |
| Anterior ischemic optic neuropathy | IVT1: n=1; IVT4: n=0; L: n=0                                                                                                                                                                       | NR                                                                                         | NR                          |              | NR                                                         | NR                                                                                                     |
| Vitrectomy                         | IVT1: n=26; IVT4: n=19; L: n=31                                                                                                                                                                    | NR                                                                                         | NR                          |              | NR                                                         | NR                                                                                                     |
| Open angle glaucoma                | IVT1: n=2; IVT4: n=7; L: n=2                                                                                                                                                                       | NR                                                                                         | NR                          |              | NR                                                         | NR                                                                                                     |

82

|                                 |                                    |                              |                                                                                         |                                                                            |                                                                                 |
|---------------------------------|------------------------------------|------------------------------|-----------------------------------------------------------------------------------------|----------------------------------------------------------------------------|---------------------------------------------------------------------------------|
| Glaucoma filtering surgery      | IVT1: n=0; IVT4: n=2; L: n=0       | NR                           | NR                                                                                      | NR                                                                         | NR                                                                              |
| Laser trabeculoplasty           | IVT1: n=0; IVT4: n=1; L: n=0       | IVT: n=2; C: n=0             | IVTL: n=1                                                                               | NR                                                                         | NR                                                                              |
| Ciliary body destruction        | IVT1: n=0; IVT4: n=1; L: n=0       | NR                           | NR                                                                                      | NR                                                                         | NR                                                                              |
| Endophthalmitis                 | IVT1: n=0; IVT4: n=0; L: n=0       | (Infectious) IVT: n=1; C: NR | (Culture-negative) IVTL: n=1                                                            | None                                                                       | (sterile) IVT: n=1                                                              |
| pseudoendophthalmitis           | IVT1: n=0; IVT4: n=0; L: n=0       | NR                           | NR                                                                                      | NR                                                                         | NR                                                                              |
| Chemosis                        | NR                                 | NR                           | NR                                                                                      | NR                                                                         | NR                                                                              |
| % increase in cataract scores   | NR                                 | NR                           | NR                                                                                      | IVT: +1.0 SD1.1 (p=NS vs. L); IVTL: +1.3 SD1.9 (p=NS vs. L); L: +0.5 SD0.9 | NR                                                                              |
| Ocular hypertension (>21 mm Hg) | NR                                 | NR                           | NR                                                                                      | NR                                                                         | NR                                                                              |
| Cataract progression            | NR                                 | NR                           | Phakic eyes, progression by $\geq 2$ AREDS grade, IVTL: 64% (p<0.001); L: 11% (p<0.001) | NR                                                                         | NR                                                                              |
| Corneal decompensation          | NR                                 | IVT: NR; C: n=1              | NR                                                                                      | NR                                                                         | NR                                                                              |
| Cataract surgery                | NR                                 | NR                           | IVTL: 61% (p<0.001); L: 0%                                                              | NR                                                                         | IVT: n=2; L: n=1                                                                |
| Vitreous haemorrhage            | NR                                 | NR                           | NR                                                                                      | IVTL: n=1                                                                  |                                                                                 |
| Lens opacity                    | NR                                 | NR                           | NR                                                                                      | NR                                                                         | Significantly greater change in lens opacity in IVT group than in L group (1.9) |
| <b>DEATHS</b>                   | N=33, unrelated to study treatment | IVT: n=1; C: n=2             | IVTL: n=2; L: n=1                                                                       | NR                                                                         | NR                                                                              |

Table 156: Safety data in trials assessing more than one drug

|                                                   | Ahmadieh 2008[31]                                                                                                                  | ATEMD 2011 (Oliveira Neto 2011) [56] | DRCR Network 2010 (Elman 2010, Elman 2011)[21,46]   | Lim 2012[55]                | Soheilian 2007 / Soheilian 2009[37,41]                                                      |
|---------------------------------------------------|------------------------------------------------------------------------------------------------------------------------------------|--------------------------------------|-----------------------------------------------------|-----------------------------|---------------------------------------------------------------------------------------------|
| Number of patients                                |                                                                                                                                    |                                      |                                                     |                             |                                                                                             |
|                                                   | <b>Ocular adverse events</b>                                                                                                       |                                      |                                                     |                             |                                                                                             |
| Mild anterior chamber reaction                    | IVB: 19.5% (n=8 eyes), resolved after one week of no treatment; IVB/IVT: 18.9% (n=7 eyes), resolved after one week of no treatment | NR                                   | NR                                                  | NR                          | IVB: 20% (n=10 eyes), resolved after 1 week; IVB/IVT: 18% (n=9 eyes), resolved after 1 week |
| Marked anterior chamber reaction                  | IVB: n=1 (topical corticosteroid and cycloplegic drops)                                                                            | NR                                   | NR                                                  | NR                          | IVB: n=1 (topical corticosteroids and cycloplegic drops);                                   |
| Progression of fibrous proliferation              | IVB: n=1 with no sign of retinal traction                                                                                          | NR                                   | NR                                                  | NR                          | IVB: n=1 with no sign of retinal traction;                                                  |
| Vitreous haemorrhage                              | IVB/IVT: n=1 after third injection (excluded from study)                                                                           | NR                                   | NR                                                  | NR                          | NR                                                                                          |
| IOP rise                                          | IVB: 23, 22 and 28 mm Hg at 6, 12 and 18 weeks (anti-glaucoma drops)                                                               | NR                                   | IOP elevation more frequent with triamcinolone + PL | IVB/IVT: 8.3%<br>IVT: 10.8% | NR                                                                                          |
| IOP $\geq$ 10 mm Hg from baseline                 | NR                                                                                                                                 | NR                                   | CPL: n=16; RPL: n=10; RDL: n=5; TPL: n=70           | NR                          | NR                                                                                          |
| IOP $\geq$ 30 mm Hg from baseline                 | NR                                                                                                                                 | NR                                   | CPL: n=3; RPL: n=2; RDL: n=4; TPL: n=46             | NR                          | NR                                                                                          |
| Initiation of IOP lowering treatment at any visit | NR                                                                                                                                 | NR                                   | CPL: n=9; RPL: n=5; RDL: n=4; TPL: n=41             | NR                          | NR                                                                                          |
| Iris neovascularization                           | None                                                                                                                               | NR                                   | NR                                                  | NR                          | NR                                                                                          |
| Lens opacity                                      | None                                                                                                                               | NR                                   | NR                                                  | NR                          | Severe lens opacity<br>IVB/IVT: n=4 eyes; MPC: n=1 eye                                      |
| Endophthalmitis                                   | NR                                                                                                                                 | NR                                   | CPL: n=1; RPL: n=1; RDL: n=1; TPL: n=0              | NR                          | None                                                                                        |
| Pseudoendophthalmitis                             | NR                                                                                                                                 | NR                                   | CPL: n=1; RPL: n=0; RDL: n=0; TPL: n=1              | NR                          | NR                                                                                          |
| Ocular vascular event                             | NR                                                                                                                                 | NR                                   | CPL: n=1; RPL: n=1; RDL: n=0; TPL: n=2              | NR                          | NR                                                                                          |



|                                        |        |                                                     |                                                                                                                                                                  |    |                                                                                                          |
|----------------------------------------|--------|-----------------------------------------------------|------------------------------------------------------------------------------------------------------------------------------------------------------------------|----|----------------------------------------------------------------------------------------------------------|
| Retinal detachment                     | NR     | NR                                                  | CPL: n=0; RPL: n=0; RDL: n=1; TPL: n=0                                                                                                                           | NR | None                                                                                                     |
| Vitrectomy                             | NR     | NR                                                  | CPL: n=7; RPL: n=0; RDL: n=3; TPL: n=0                                                                                                                           | NR | NR                                                                                                       |
| Vitreous haemorrhage                   | NR     | NR                                                  | CPL: n=15; RPL: n=3; RDL: n=4; TPL: n=2                                                                                                                          | NR | None                                                                                                     |
| Cataract surgery                       | NR     | NR                                                  | CPL: n=11 (of those phakic at baseline); RPL: n=6 (of those phakic at baseline); RDL: n=8 (of those phakic at baseline); TPL: n=19 (of those phakic at baseline) | NR | NR                                                                                                       |
| Glaucoma surgery                       | NR     | NR                                                  | NR                                                                                                                                                               | NR | NR                                                                                                       |
| Retinal neovascularization             | NR     | NR                                                  | NR                                                                                                                                                               | NR | IVB: n=4 (all resolved); MPC: n=3 eyes (2 resolved)                                                      |
| Development of early PDR               | NR     | NR                                                  | NR                                                                                                                                                               | NR | IVB: n=1; IVB/IVT: n=4; MPC: n=3                                                                         |
| Progression to high-risk PDR           | NR     | NR                                                  | NR                                                                                                                                                               | NR | IVB: n=4; IVB/IVT: n=3; MP: n=3                                                                          |
| Ocular hypertension ( $\geq 23$ mm HG) | NR     | NR                                                  | NR                                                                                                                                                               | NR | IVB/IVT: 16% (n=8 of eyes), controlled medically in all except 1 that progressed to neovascular glaucoma |
| <b>Systemic adverse events</b>         |        |                                                     |                                                                                                                                                                  |    |                                                                                                          |
| Acute myocardial infarction            |        | N=1, considered not to be related to the study drug | No specific systemic adverse events that could be attributed to chance                                                                                           |    | No significant blood pressure increase, no thromboembolic events                                         |
| Deaths                                 | C: n=1 | N=1, considered not to be related to the study drug | CPL: n=8; RPL: n=5; RDL: n=3; TPL: n=2                                                                                                                           |    | IVB/IVT: n=2; MPC: n=2                                                                                   |

NR – not reported, IVB – intra-vitreous bevacizumab, IVT- intravitreal triamcinolone, IVR – intra-vitreous ranibizumab, IVRL – intra-vitreous ranibizumab plus laser, C – control, L – laser, IOP –intra-ocular pressure, PDR – proliferative diabetic retinopathy, DMO – diabetic macular oedema,

**Table 16: Study quality**

| Study (author and year)              | Adequate sequence generation | Allocation concealment | Masking                                                                   | Incomplete outcome data addressed                                              | Free of selective reporting | Free of other bias (eg, similarity at baseline; power assessment)                                                                                                        | Funder                                                              |
|--------------------------------------|------------------------------|------------------------|---------------------------------------------------------------------------|--------------------------------------------------------------------------------|-----------------------------|--------------------------------------------------------------------------------------------------------------------------------------------------------------------------|---------------------------------------------------------------------|
| <b>Anti-VEGFs</b>                    |                              |                        |                                                                           |                                                                                |                             |                                                                                                                                                                          |                                                                     |
| <b>Ranibizumab</b>                   |                              |                        |                                                                           |                                                                                |                             |                                                                                                                                                                          |                                                                     |
| READ-2 Study [28,47]                 | Unclear                      | Unclear                | Unclear                                                                   | Yes (91.3% completion)                                                         | Yes                         | Comparison groups similar at baseline; power analysis not mentioned                                                                                                      | Juvenile Diabetes Research Foundation; Genentech Inc.               |
| RESOLVE Study (Massin 2010)[36]      | Yes                          | Yes                    | Yes (patients and outcome assessors)                                      | Yes (82% completion in sham arm; 90.2% with ranibizumab)                       | Yes                         | Comparison groups similar at baseline; power analysis unclear                                                                                                            | Novartis Pharma, Switzerland                                        |
| RESTORE Study (Mitchell 2011)[24]    | Yes                          | Unclear                | Yes (patients, outcome assessors)                                         | Yes (87.2 to 88.2% completion)                                                 | Yes                         | Comparison groups similar at baseline; power analysis carried out (power adequate for VA changes)                                                                        | Novartis Pharma, Switzerland                                        |
| RISE and RIDE (Nguyen 2012)[38]      | Yes                          | Yes                    | Yes (patients, treating physician masked to assigned dose of ranibizumab) | Yes (2 year study completed by 83.2% of patients in RISE and by 84.6% in RIDE) | Yes                         | Comparison groups similar at baseline; ITT analysis; power analysis carried out (power adequate for primary endpoint)                                                    | Genentech Inc.                                                      |
| <b>Bevacizumab</b>                   |                              |                        |                                                                           |                                                                                |                             |                                                                                                                                                                          |                                                                     |
| BOLT Study (Michaelides 2010)[23,52] | Yes                          | Unclear                | Partial (outcome assessors, not patients)                                 | Yes (97.5% completion)                                                         | Yes                         | Comparison groups similar at baseline (except laser group had longer duration of clinically significant DMO); power analysis carried out (power adequate for VA changes) | Moorfields Special Trustees; National Institute for Health Research |
| Faghihi 2010[53]                     | Yes                          | Unclear                | Yes (patient)                                                             | Yes (100% completion)                                                          | Yes                         | Comparable groups at baseline                                                                                                                                            | Not specified                                                       |

Field Code Changed

| Study (author and year)              | Adequate sequence generation                 | Allocation concealment | Masking                                                         | Incomplete outcome data addressed | Free of selective reporting | Free of other bias (e.g. similarity at baseline, power assessment)                                                          | Funder                                                                          |
|--------------------------------------|----------------------------------------------|------------------------|-----------------------------------------------------------------|-----------------------------------|-----------------------------|-----------------------------------------------------------------------------------------------------------------------------|---------------------------------------------------------------------------------|
| Lam 2009[35]                         | Yes                                          | Yes                    | Yes (patients and technicians assessing BCVA, OCT and IOP)      | Yes (92.3% follow-up at 6 months) | Yes                         | Comparison groups similar at baseline; power analysis carried out (power adequate for CMT changes)                          | supported in part by the Action for Vision Eye Foundation Hong Kong (charity)   |
| <b>Pegaptanib</b>                    |                                              |                        |                                                                 |                                   |                             |                                                                                                                             |                                                                                 |
| Cunningham 2005/ Adams 2006[39,57]   | Yes                                          | Unclear                | Yes (patients and outcome assessors)                            | Yes (95% completion)              | Yes                         | Comparison groups similar at baseline; acknowledge lack of power to detect differences between doses of pegaptanib          | Eyeteck Pharmaceuticals Inc., New York, and Pfizer Inc., New York               |
| Sultan 2011[40]                      | Yes                                          | Unclear                | Yes (patients and outcome assessors)                            | Yes (69.9 to 72.8% completion)    | Yes                         | Comparison groups similar at baseline; power analysis carried out (power adequate for VA changes)                           | Pfizer Inc., New York                                                           |
| <b>Aflibercept</b>                   |                                              |                        |                                                                 |                                   |                             |                                                                                                                             |                                                                                 |
| De Vries 2010 [20,58]                | Unclear (predetermined randomization scheme) | Unclear                | Yes (patients)                                                  | Yes (85% completion)              | Yes                         | Comparison groups similar at baseline; power calculation completed                                                          | Regeneron Pharmaceuticals, Inc., New York                                       |
| <b>Steroids</b>                      |                                              |                        |                                                                 |                                   |                             |                                                                                                                             |                                                                                 |
| <b>Dexamethasone</b>                 |                                              |                        |                                                                 |                                   |                             |                                                                                                                             |                                                                                 |
| Haller 2010[59]                      | Yes                                          | Unclear                | Yes (patients to dexamethasone dose; outcome assessors)         | Yes (92% completion)              | Yes                         | Comparison groups similar at baseline; power analysis carried out, but study not powered to detect differences in subgroups | Ocular Therapeutix Inc.                                                         |
| <b>Fluocinolone</b>                  |                                              |                        |                                                                 |                                   |                             |                                                                                                                             |                                                                                 |
| FAME Study (Campochiaro 2011)[29,60] | Unclear                                      | Unclear                | Partial (patients; masking of outcome assessment not mentioned) | Yes (drop-out rate 19.0 to 22.7%) | Yes                         | Comparison groups similar at baseline; power analysis not mentioned                                                         | Alimera Sciences Inc., Atlanta, Georgia; Psivida Inc., Watertown, Massachusetts |

Field Code Changed

| Study (author and year)                           | Adequate sequence generation | Allocation concealment | Masking                                                                                                                              | Incomplete outcome data addressed              | Free of selective reporting | Free of other bias (e.g. similarity at baseline, power assessment)                                                               | Funder                                                                                                                                                                                          |
|---------------------------------------------------|------------------------------|------------------------|--------------------------------------------------------------------------------------------------------------------------------------|------------------------------------------------|-----------------------------|----------------------------------------------------------------------------------------------------------------------------------|-------------------------------------------------------------------------------------------------------------------------------------------------------------------------------------------------|
| Pearson 2011[43]                                  | Yes                          | Unclear                | Third party masked design (patient and investigator not masked)                                                                      | No losses to follow-up                         | Yes                         | Demographic characteristics were similar between implant and SOC groups; power calculation done, study adequately powered.       | Bausch & Lomb Inc., Rochester, New York                                                                                                                                                         |
| <i>Triamcinolone</i>                              |                              |                        |                                                                                                                                      |                                                |                             |                                                                                                                                  |                                                                                                                                                                                                 |
| DRCR Network 2008 [22,61,62,64]                   | Yes                          | Unclear                | Partial (patients to triamcinolone dose; outcome assessors not formally masked but generally not aware of participant's study group) | Yes (81 to 86% completion)                     | Yes                         | Comparison groups similar at baseline; power analysis carried out (power adequate for VA changes)                                | Cooperative agreement from the National Eye Institute, National Institute of Diabetes and Digestive and Kidney Diseases, National Institutes of Health, Department of Health and Human Services |
| Gillies 2006 /2007 /2009 /Sutter 2004[32,137-139] | Yes                          | Yes                    | Yes (patients, outcome assessors)                                                                                                    | Yes (91% completion intervention; 83% control) | Yes                         | Comparison groups similar at baseline (but limited demographic data); power analysis carried out (power adequate for VA changes) | Sydney Eye Hospital Foundation and Juvenile Diabetes Research Foundation, New York                                                                                                              |
| Gillies 2011[33]                                  | Yes                          | Yes                    | Yes (patients, outcome assessors)                                                                                                    | Yes (84.5% completion)                         | Yes                         | power analysis carried out (power adequate for VA changes)                                                                       | National Health and Medical Research Council, Canberra, Australia, and the Sydney Eye Hospital Foundation, Sydney, Australia                                                                    |
| Lam 2007[34]                                      | Yes                          | Yes                    | Partial (outcome assessors)                                                                                                          | No losses to follow-up                         | Yes                         | Comparison groups similar at baseline; power analysis carried out (power adequate for CMT changes)                               | Action for Vision Foundation, Hong Kong                                                                                                                                                         |
| Oskim 2008/Sviprasad 2008[42,62]                  | Yes                          | Unclear                | Unclear                                                                                                                              | Yes (94% completion)                           | Yes                         | Comparison groups similar at baseline; power analysis carried out (power adequate for VA changes)                                | Special Trustees of Moorfields Eye Hospital                                                                                                                                                     |
| Active comparator trials                          |                              |                        |                                                                                                                                      |                                                |                             |                                                                                                                                  |                                                                                                                                                                                                 |

Field Code Changed

Field Code Changed

Field Code Changed

Field Code Changed

1  
2  
3  
4  
5  
6  
7  
8  
9  
10  
11  
12  
13  
14  
15  
16  
17  
18  
19  
20  
21  
22  
23  
24  
25  
26  
27  
28  
29  
30  
31  
32  
33  
34  
35  
36  
37  
38  
39  
40  
41  
42  
43  
44  
45  
46  
47  
48  
49

| Study (author and year) | Adequate sequence generation | Allocation concealment | Masking                                                                                                   | Incomplete outcome data addressed          | Free of selective reporting | Free of other bias (e.g. similarity at baseline, power assessment)                                                                                                      | Funder                                                                                                                                                                                                                                                                                                                         |
|-------------------------|------------------------------|------------------------|-----------------------------------------------------------------------------------------------------------|--------------------------------------------|-----------------------------|-------------------------------------------------------------------------------------------------------------------------------------------------------------------------|--------------------------------------------------------------------------------------------------------------------------------------------------------------------------------------------------------------------------------------------------------------------------------------------------------------------------------|
| Ahmadieh 2008[31]       | Yes                          | Yes                    | Yes (patients and outcome assessors)                                                                      | Unclear                                    | Yes                         | CMT lower in control group at baseline (p<0.05); other baseline values similar; power analysis carried out (power adequate for CMT changes)                             | Not reported                                                                                                                                                                                                                                                                                                                   |
| DRCR Network [21,46]    | Yes                          | Unclear                | Yes (patients, except deferred laser group; outcome assessors); masking discontinued after the first year | Yes (1-year completion for 91.05% of eyes) | Yes                         | Comparison groups similar at baseline; power analysis carried out (power adequate for VA changes)                                                                       | Cooperative agreement from the National Eye Institute, National Institute of Diabetes and Digestive and Kidney Diseases, National Institutes of Health and Human Services; Ranibizumab provided by Genentech; triamcinolone provided by Allergan Inc.; companies also provided funds to defray the study's clinical site costs |
| Lim 2012[55]            | Yes                          | Unclear                | Yes (investigators only)                                                                                  | Yes (7.5% drop out after enrollment)       | Yes                         | Groups similar at baseline. The bevacizumab group received more injections.                                                                                             | Not reported                                                                                                                                                                                                                                                                                                                   |
| Soheilian [37,41]       | Yes                          | Yes                    | Yes (patients and outcome assessors)                                                                      | Unclear (36 week completion for 76 to 88%) | Yes                         | CMT significantly lower and VA significantly better in MPC group at baseline; other baseline values similar; power analysis carried out (power adequate for VA changes) | Ophthalmic Research Centre, Labbafinejad Medical Center, Tehran                                                                                                                                                                                                                                                                |

Field Code Changed

Field Code Changed

Field Code Changed

Field Code Changed

1  
2  
3  
4  
5  
6  
7  
8  
9  
10  
11  
12  
13  
14  
15  
16  
17  
18  
19  
20  
21  
22  
23  
24  
25  
26  
27  
28  
29  
30  
31  
32  
33  
34  
35  
36  
37  
38  
39  
40  
41  
42  
43  
44  
45  
46  
47  
48  
49

For peer review only

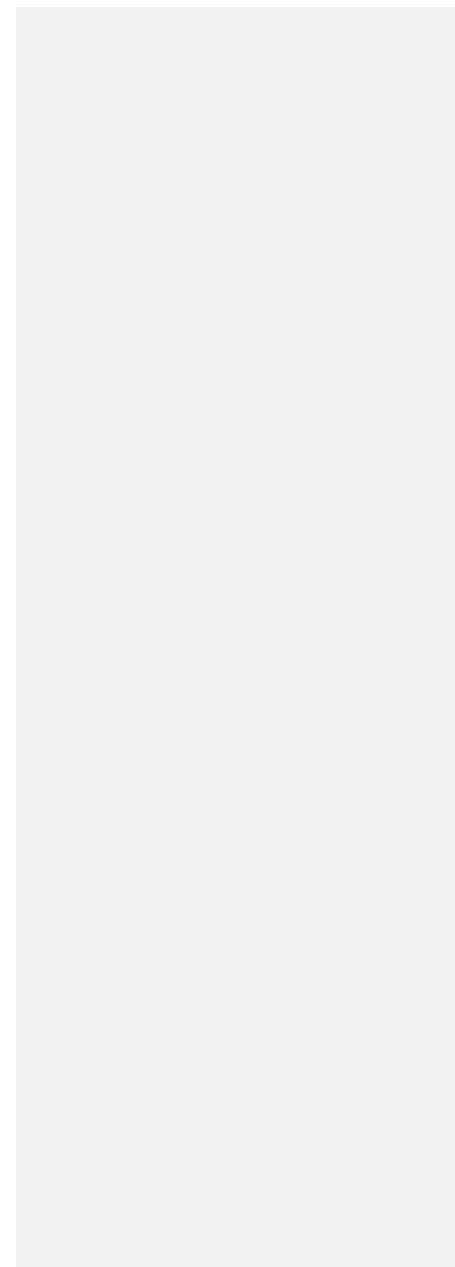



# PRISMA 2009 Checklist

| Section/topic                      | #  | Checklist item                                                                                                                                                                                                                                                                                              | Reported on page # |
|------------------------------------|----|-------------------------------------------------------------------------------------------------------------------------------------------------------------------------------------------------------------------------------------------------------------------------------------------------------------|--------------------|
| <b>TITLE</b>                       |    |                                                                                                                                                                                                                                                                                                             |                    |
| Title                              | 1  | Identify the report as a systematic review, meta-analysis, or both.                                                                                                                                                                                                                                         | 1                  |
| <b>ABSTRACT</b>                    |    |                                                                                                                                                                                                                                                                                                             |                    |
| Structured summary                 | 2  | Provide a structured summary including, as applicable: background; objectives; data sources; study eligibility criteria, participants, and interventions; study appraisal and synthesis methods; results; limitations; conclusions and implications of key findings; systematic review registration number. | 2                  |
| <b>INTRODUCTION</b>                |    |                                                                                                                                                                                                                                                                                                             |                    |
| Rationale                          | 3  | Describe the rationale for the review in the context of what is already known.                                                                                                                                                                                                                              | 5                  |
| Objectives                         | 4  | Provide an explicit statement of questions being addressed with reference to participants, interventions, comparisons, outcomes, and study design (PICOS).                                                                                                                                                  | 5                  |
| <b>METHODS</b>                     |    |                                                                                                                                                                                                                                                                                                             |                    |
| Protocol and registration          | 5  | Indicate if a review protocol exists, if and where it can be accessed (e.g., Web address), and, if available, provide registration information including registration number.                                                                                                                               | 1                  |
| Eligibility criteria               | 6  | Specify study characteristics (e.g., PICOS, length of follow-up) and report characteristics (e.g., years considered, language, publication status) used as criteria for eligibility, giving rationale.                                                                                                      | 6                  |
| Information sources                | 7  | Describe all information sources (e.g., databases with dates of coverage, contact with study authors to identify additional studies) in the search and date last searched.                                                                                                                                  | 6                  |
| Search                             | 8  | Present full electronic search strategy for at least one database, including any limits used, such that it could be repeated.                                                                                                                                                                               | Appendix 1         |
| Study selection                    | 9  | State the process for selecting studies (i.e., screening, eligibility, included in systematic review, and, if applicable, included in the meta-analysis).                                                                                                                                                   | 6                  |
| Data collection process            | 10 | Describe method of data extraction from reports (e.g., piloted forms, independently, in duplicate) and any processes for obtaining and confirming data from investigators.                                                                                                                                  | 6                  |
| Data items                         | 11 | List and define all variables for which data were sought (e.g., PICOS, funding sources) and any assumptions and simplifications made.                                                                                                                                                                       | 6-7                |
| Risk of bias in individual studies | 12 | Describe methods used for assessing risk of bias of individual studies (including specification of whether this was done at the study or outcome level), and how this information is to be used in any data synthesis.                                                                                      | 6                  |
| Summary measures                   | 13 | State the principal summary measures (e.g., risk ratio, difference in means).                                                                                                                                                                                                                               | 7                  |
| Synthesis of results               | 14 | Describe the methods of handling data and combining results of studies, if done, including measures of consistency (e.g., $I^2$ for each meta-analysis)                                                                                                                                                     | 7                  |

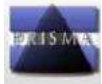

# PRISMA 2009 Checklist

Page 1 of 2

| Section/topic                 | #  | Checklist item                                                                                                                                                                                           | Reported on page # |
|-------------------------------|----|----------------------------------------------------------------------------------------------------------------------------------------------------------------------------------------------------------|--------------------|
| Risk of bias across studies   | 15 | Specify any assessment of risk of bias that may affect the cumulative evidence (e.g., publication bias, selective reporting within studies).                                                             | 6-7                |
| Additional analyses           | 16 | Describe methods of additional analyses (e.g., sensitivity or subgroup analyses, meta-regression), if done, indicating which were pre-specified.                                                         | 7                  |
| <b>RESULTS</b>                |    |                                                                                                                                                                                                          |                    |
| Study selection               | 17 | Give numbers of studies screened, assessed for eligibility, and included in the review, with reasons for exclusions at each stage, ideally with a flow diagram.                                          | 8                  |
| Study characteristics         | 18 | For each study, present characteristics for which data were extracted (e.g., study size, PICOS, follow-up period) and provide the citations.                                                             | Tables 2-7         |
| Risk of bias within studies   | 19 | Present data on risk of bias of each study and, if available, any outcome level assessment (see item 12).                                                                                                | 7-15               |
| Results of individual studies | 20 | For all outcomes considered (benefits or harms), present, for each study: (a) simple summary data for each intervention group (b) effect estimates and confidence intervals, ideally with a forest plot. | Figures 2-7        |
| Synthesis of results          | 21 | Present results of each meta-analysis done, including confidence intervals and measures of consistency.                                                                                                  | Figures 2-7        |
| Risk of bias across studies   | 22 | Present results of any assessment of risk of bias across studies (see Item 15).                                                                                                                          | Table 16           |
| Additional analysis           | 23 | Give results of additional analyses, if done (e.g., sensitivity or subgroup analyses, meta-regression [see Item 16]).                                                                                    | Figures 2-7        |
| <b>DISCUSSION</b>             |    |                                                                                                                                                                                                          |                    |
| Summary of evidence           | 24 | Summarize the main findings including the strength of evidence for each main outcome; consider their relevance to key groups (e.g., healthcare providers, users, and policy makers).                     | 17                 |
| Limitations                   | 25 | Discuss limitations at study and outcome level (e.g., risk of bias), and at review-level (e.g., incomplete retrieval of identified research, reporting bias).                                            | 17-18              |
| Conclusions                   | 26 | Provide a general interpretation of the results in the context of other evidence, and implications for future research.                                                                                  | 18-19              |
| <b>FUNDING</b>                |    |                                                                                                                                                                                                          |                    |
| Funding                       | 27 | Describe sources of funding for the systematic review and other support (e.g., supply of data); role of funders for the systematic review.                                                               | 1                  |

From: Moher D, Liberati A, Tetzlaff J, Altman DG, The PRISMA Group (2009). Preferred Reporting Items for Systematic Reviews and Meta-Analyses: The PRISMA Statement. PLoS Med 6(6): e1000097. doi:10.1371/journal.pmed1000097

For peer review only - <http://bmjopen.bmj.com/site/about/guidelines.xhtml>

For more information, visit: [www.prisma-statement.org](http://www.prisma-statement.org).



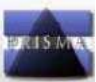

# PRISMA 2009 Checklist

- 1
- 2
- 3
- 4
- 5
- 6
- 7
- 8
- 9
- 10
- 11
- 12
- 13
- 14
- 15
- 16
- 17
- 18
- 19
- 20
- 21
- 22
- 23
- 24
- 25
- 26
- 27
- 28
- 29
- 30
- 31
- 32
- 33
- 34
- 35
- 36
- 37
- 38
- 39
- 40
- 41
- 42
- 43
- 44
- 45
- 46
- 47
- 48
- 49

For peer review only
